# Supplementary material
Source: MDPI journal article supplement (https://www.mdpi.com/2076-3417/11/1/54)
Supplement: s1 [file s1]

## Supporting Material

# Intra-cage Structure, Vibrations and Tetrahedral-Site Hopping of H<sub>2</sub> and D<sub>2</sub> in Doubly-Occupied 5<sup>12</sup>6<sup>4</sup> Cages in sII Clathrate Hydrate from Path-Integral and Classical Molecular Dynamics

Niall J. English\* and Christian J. Burnham

School of Chemical and Bioprocess Engineering, University College Dublin, Belfield, Dublin 4, Ireland

E-mail: niall.english@ucd.ie

## Accompanying Gaussian cube-file listing

cube5.cub: small-cage (dodecahedral) D<sub>2</sub> density (classical)

cube6.cub: large-cage (5-12-6-4) D<sub>2</sub> density (classical)

cube5p.cub: small-cage (dodecahedral) D<sub>2</sub> density (path integral)

cube6p.cub: large-cage (5-12-6-4) D<sub>2</sub> density (path integral)

## Proton-Velocity Spectra

The proton-velocity spectra in both the lattice and guests are presented below, including for the deuterated cases, sampled from classically-propagated MD at 100 K. The frequency modes obey the expected isotope effect quite well, in that doubling the mass serves to reduce the observed frequency mode by  $\sqrt{2}$ . This is evident in Fig. S1c, where the frequencies of the deuterated spectra are scaled by  $\sqrt{2}$ .

Fig. 1 depicts the translational-librational region, whilst Fig. 2 shows the full frequency range (up to bond stretch). In both cases, the units are arbitrary on the ordinate axes.

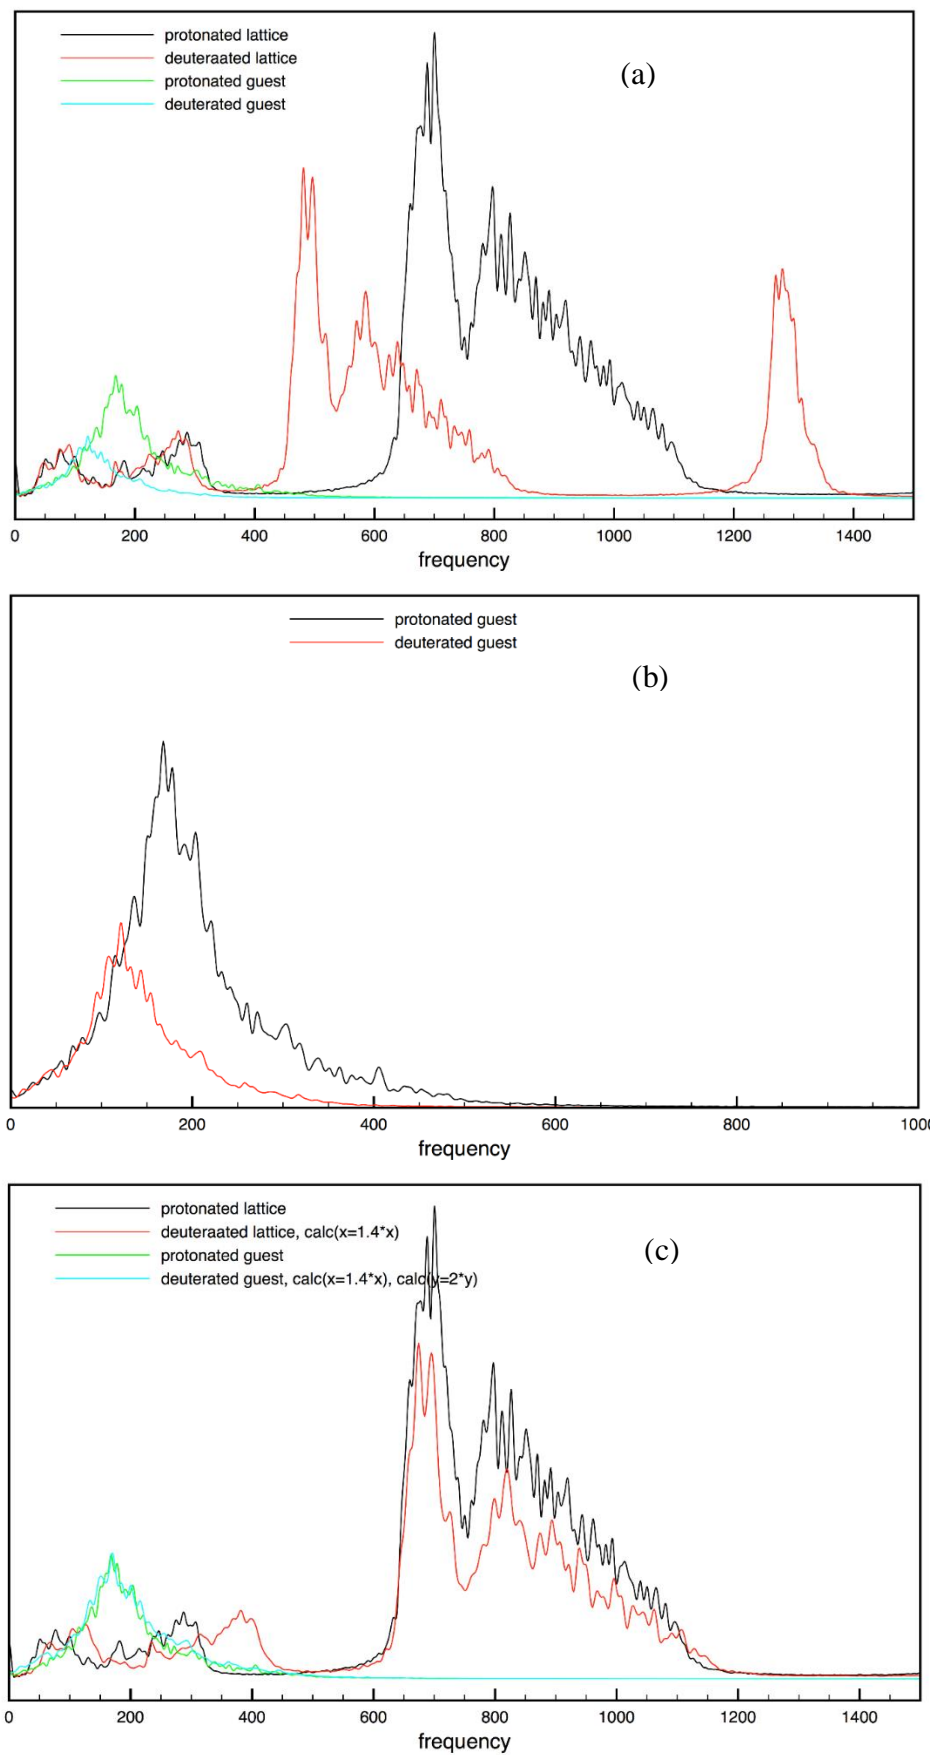

Fig. S1: Translational and librational region of the (a) lattice and (b) guest proton-velocity spectra. In (c), there is scaling by a factor of  $\sqrt{2}$  applied for the deuterated spectra, indicating the expected isotopic vibrational effect.

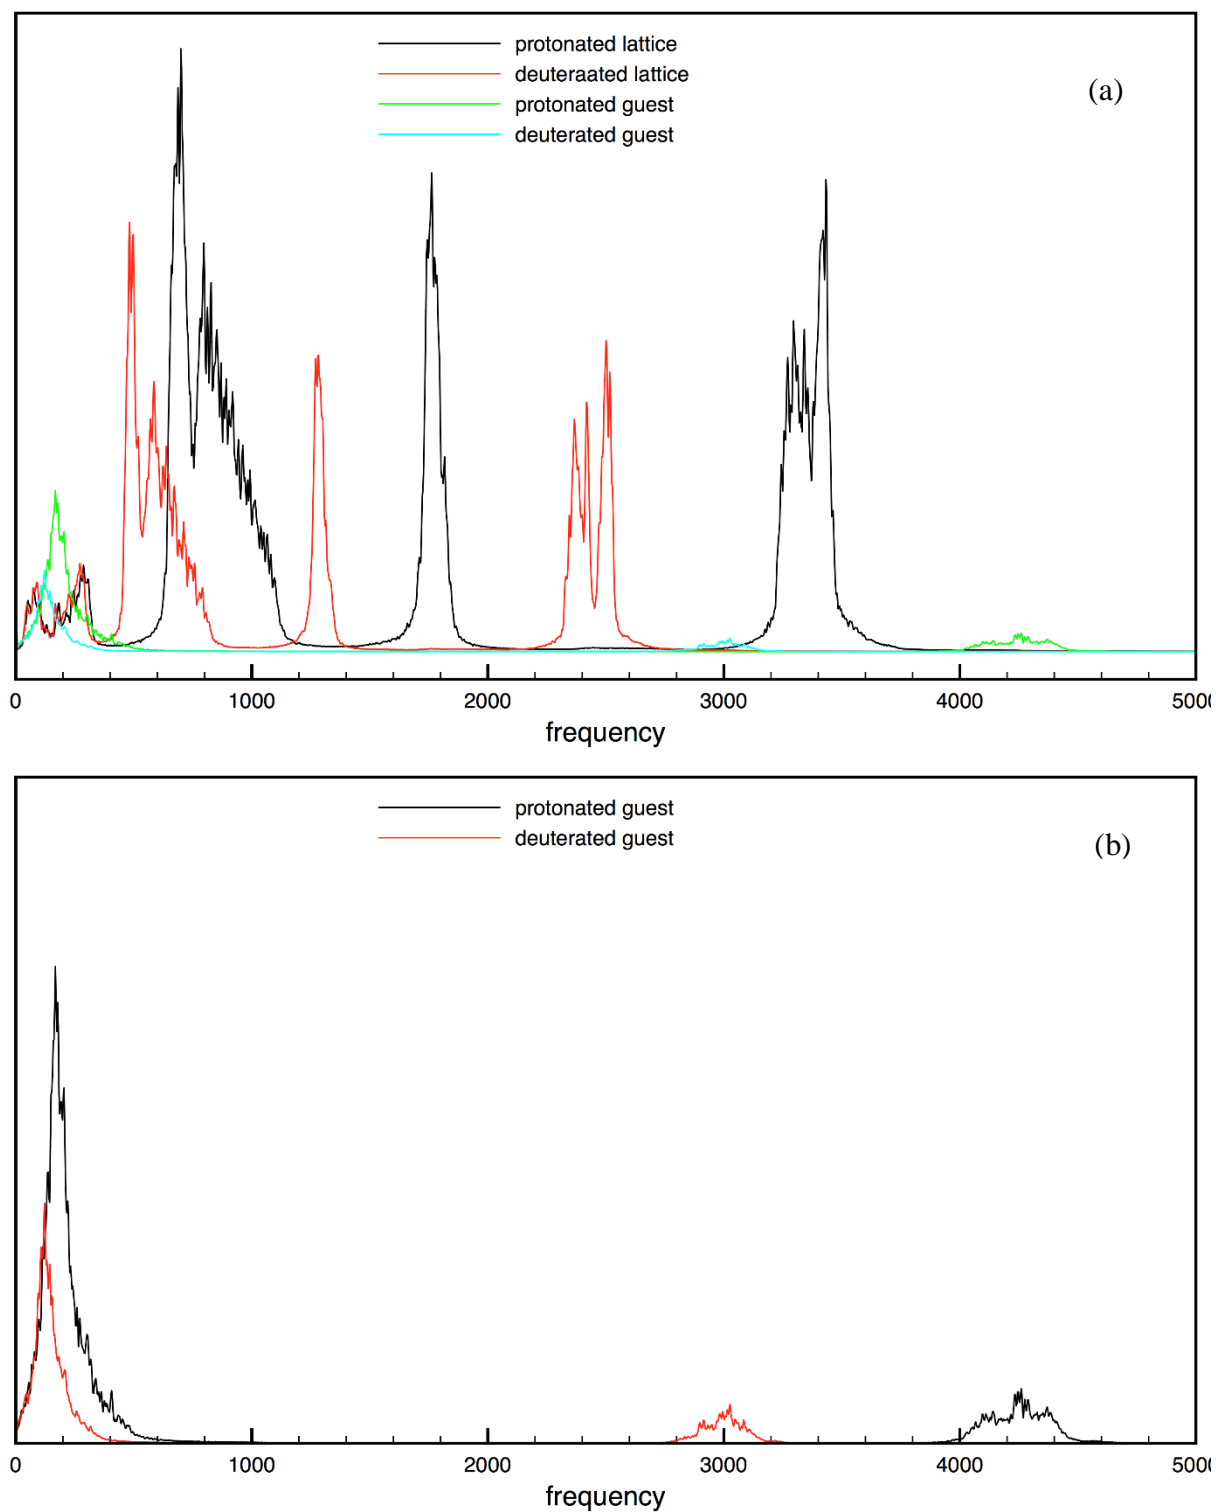

Fig. S2: Full frequency range, up to bond-stretch region, of the (a) lattice and (b) guest proton-velocity spectra.

# Temperature dependence of $\tau_1$ and $\tau_2$ bi-exponential times: Arrhenius plots

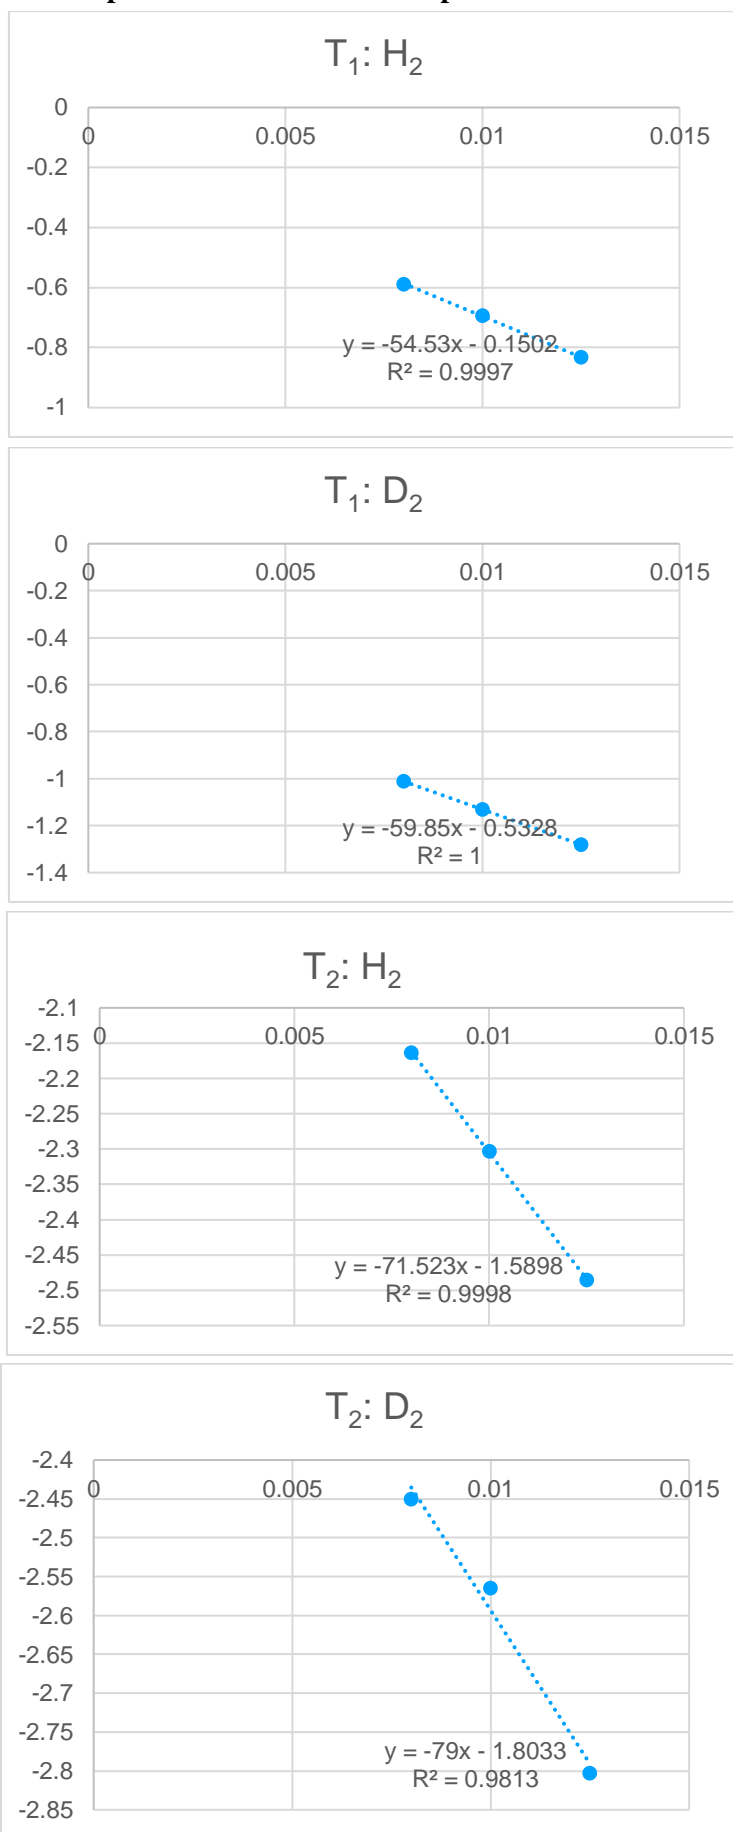

Fig. S3: Arrhenius plots for  $H_2$  and  $D_2$  at 80, 100 and 125 K. Activation energies are: 0.45, 0.50, 0.59, 0.66 kJ/mol for  $\tau_1$  ( $H_2$ ,  $D_2$ ) and  $\tau_2$  ( $H_2$ ,  $D_2$ ), respectively.
