# Supplementary material
Source: MDPI journal article supplement (https://www.mdpi.com/2076-3417/11/1/54)
Supplement: s1 [file s1]

Archive with 5 entries (5 files):
- applsci-1002633-supplementary.pdf
- cube5.cub
- cube5p.cub
- cube6.cub
- cube6p.cub
