# Supplementary material
Source: MDPI journal article supplement (https://www.mdpi.com/2076-3417/11/1/54)
Supplement: s1 [file s1 › cube5.cub]

 cube data
 Gaussian cube format
          20  -4.00000000      -4.00000000      -4.00000000    
          64  0.12500000000000000        0.00000000       0.00000000    
          64   0.00000000      0.12500000000000000        0.00000000    
          64   0.00000000       0.00000000      0.12500000000000000     
           8   0.00000000      -2.07932115      -1.97276700      -2.29387593    
           8   0.00000000       2.57476497      -2.21362805      -1.96726346    
           8   0.00000000      -2.07932115       2.27726197      -2.29387593    
           8   0.00000000      -2.07932115      -2.38401127       2.08618355    
           8   0.00000000      -1.20171297       3.10951341E-02  -3.64859223    
           8   0.00000000      -8.27104375E-02  -3.44043517      -1.46554470    
           8   0.00000000      -3.36651993      -1.60861683       1.81695260E-02
           8   0.00000000       1.37976837     -0.150253966      -3.04398751    
           8   0.00000000       8.35594907E-02  -3.75244761       1.07881391    
           8   0.00000000      -3.44887543       1.18188727     -0.192929804    
           8   0.00000000      -9.25951824E-02   3.47910786     -0.971088886    
           8   0.00000000      -2.52592993       2.10793495       1.96762836    
           8   0.00000000       2.06156039       2.02736568      -1.78186619    
           8   0.00000000       3.92802548      -1.07401597      0.240619898    
           8   0.00000000      -1.39689958       7.63945431E-02   3.04915285    
           8   0.00000000       2.11985850      -2.26859164       1.90588117    
           8   0.00000000       1.89247549       2.47682309       2.18984962    
           8   0.00000000     -0.444541454       3.58778286       1.62332189    
           8   0.00000000       3.46250343       1.65802848      0.285480410    
           8   0.00000000       1.29523230      -3.89175750E-02   3.21392608    
   0.00000000    
   0.00000000    
   0.00000000    
   0.00000000    
   0.00000000    
   0.00000000    
   0.00000000    
   0.00000000    
   0.00000000    
   0.00000000    
   0.00000000    
   0.00000000    
   0.00000000    
   0.00000000    
   0.00000000    
   0.00000000    
   0.00000000    
   0.00000000    
   0.00000000    
   0.00000000    
   0.00000000    
   0.00000000    
   0.00000000    
   0.00000000    
   0.00000000    
   0.00000000    
   0.00000000    
   0.00000000    
   0.00000000    
   0.00000000    
   0.00000000    
   0.00000000    
   0.00000000    
   0.00000000    
   0.00000000    
   0.00000000    
   0.00000000    
   0.00000000    
   0.00000000    
   0.00000000    
   0.00000000    
   0.00000000    
   0.00000000    
   0.00000000    
   0.00000000    
   0.00000000    
   0.00000000    
   0.00000000    
   0.00000000    
   0.00000000    
   0.00000000    
   0.00000000    
   0.00000000    
   0.00000000    
   0.00000000    
   0.00000000    
   0.00000000    
   0.00000000    
   0.00000000    
   0.00000000    
   0.00000000    
   0.00000000    
   0.00000000    
   0.00000000    
   0.00000000    
   0.00000000    
   0.00000000    
   0.00000000    
   0.00000000    
   0.00000000    
   0.00000000    
   0.00000000    
   0.00000000    
   0.00000000    
   0.00000000    
   0.00000000    
   0.00000000    
   0.00000000    
   0.00000000    
   0.00000000    
   0.00000000    
   0.00000000    
   0.00000000    
   0.00000000    
   0.00000000    
   0.00000000    
   0.00000000    
   0.00000000    
   0.00000000    
   0.00000000    
   0.00000000    
   0.00000000    
   0.00000000    
   0.00000000    
   0.00000000    
   0.00000000    
   0.00000000    
   0.00000000    
   0.00000000    
   0.00000000    
   0.00000000    
   0.00000000    
   0.00000000    
   0.00000000    
   0.00000000    
   0.00000000    
   0.00000000    
   0.00000000    
   0.00000000    
   0.00000000    
   0.00000000    
   0.00000000    
   0.00000000    
   0.00000000    
   0.00000000    
   0.00000000    
   0.00000000    
   0.00000000    
   0.00000000    
   0.00000000    
   0.00000000    
   0.00000000    
   0.00000000    
   0.00000000    
   0.00000000    
   0.00000000    
   0.00000000    
   0.00000000    
   0.00000000    
   0.00000000    
   0.00000000    
   0.00000000    
   0.00000000    
   0.00000000    
   0.00000000    
   0.00000000    
   0.00000000    
   0.00000000    
   0.00000000    
   0.00000000    
   0.00000000    
   0.00000000    
   0.00000000    
   0.00000000    
   0.00000000    
   0.00000000    
   0.00000000    
   0.00000000    
   0.00000000    
   0.00000000    
   0.00000000    
   0.00000000    
   0.00000000    
   0.00000000    
   0.00000000    
   0.00000000    
   0.00000000    
   0.00000000    
   0.00000000    
   0.00000000    
   0.00000000    
   0.00000000    
   0.00000000    
   0.00000000    
   0.00000000    
   0.00000000    
   0.00000000    
   0.00000000    
   0.00000000    
   0.00000000    
   0.00000000    
   0.00000000    
   0.00000000    
   0.00000000    
   0.00000000    
   0.00000000    
   0.00000000    
   0.00000000    
   0.00000000    
   0.00000000    
   0.00000000    
   0.00000000    
   0.00000000    
   0.00000000    
   0.00000000    
   0.00000000    
   0.00000000    
   0.00000000    
   0.00000000    
   0.00000000    
   0.00000000    
   0.00000000    
   0.00000000    
   0.00000000    
   0.00000000    
   0.00000000    
   0.00000000    
   0.00000000    
   0.00000000    
   0.00000000    
   0.00000000    
   0.00000000    
   0.00000000    
   0.00000000    
   0.00000000    
   0.00000000    
   0.00000000    
   0.00000000    
   0.00000000    
   0.00000000    
   0.00000000    
   0.00000000    
   0.00000000    
   0.00000000    
   0.00000000    
   0.00000000    
   0.00000000    
   0.00000000    
   0.00000000    
   0.00000000    
   0.00000000    
   0.00000000    
   0.00000000    
   0.00000000    
   0.00000000    
   0.00000000    
   0.00000000    
   0.00000000    
   0.00000000    
   0.00000000    
   0.00000000    
   0.00000000    
   0.00000000    
   0.00000000    
   0.00000000    
   0.00000000    
   0.00000000    
   0.00000000    
   0.00000000    
   0.00000000    
   0.00000000    
   0.00000000    
   0.00000000    
   0.00000000    
   0.00000000    
   0.00000000    
   0.00000000    
   0.00000000    
   0.00000000    
   0.00000000    
   0.00000000    
   0.00000000    
   0.00000000    
   0.00000000    
   0.00000000    
   0.00000000    
   0.00000000    
   0.00000000    
   0.00000000    
   0.00000000    
   0.00000000    
   0.00000000    
   0.00000000    
   0.00000000    
   0.00000000    
   0.00000000    
   0.00000000    
   0.00000000    
   0.00000000    
   0.00000000    
   0.00000000    
   0.00000000    
   0.00000000    
   0.00000000    
   0.00000000    
   0.00000000    
   0.00000000    
   0.00000000    
   0.00000000    
   0.00000000    
   0.00000000    
   0.00000000    
   0.00000000    
   0.00000000    
   0.00000000    
   0.00000000    
   0.00000000    
   0.00000000    
   0.00000000    
   0.00000000    
   0.00000000    
   0.00000000    
   0.00000000    
   0.00000000    
   0.00000000    
   0.00000000    
   0.00000000    
   0.00000000    
   0.00000000    
   0.00000000    
   0.00000000    
   0.00000000    
   0.00000000    
   0.00000000    
   0.00000000    
   0.00000000    
   0.00000000    
   0.00000000    
   0.00000000    
   0.00000000    
   0.00000000    
   0.00000000    
   0.00000000    
   0.00000000    
   0.00000000    
   0.00000000    
   0.00000000    
   0.00000000    
   0.00000000    
   0.00000000    
   0.00000000    
   0.00000000    
   0.00000000    
   0.00000000    
   0.00000000    
   0.00000000    
   0.00000000    
   0.00000000    
   0.00000000    
   0.00000000    
   0.00000000    
   0.00000000    
   0.00000000    
   0.00000000    
   0.00000000    
   0.00000000    
   0.00000000    
   0.00000000    
   0.00000000    
   0.00000000    
   0.00000000    
   0.00000000    
   0.00000000    
   0.00000000    
   0.00000000    
   0.00000000    
   0.00000000    
   0.00000000    
   0.00000000    
   0.00000000    
   0.00000000    
   0.00000000    
   0.00000000    
   0.00000000    
   0.00000000    
   0.00000000    
   0.00000000    
   0.00000000    
   0.00000000    
   0.00000000    
   0.00000000    
   0.00000000    
   0.00000000    
   0.00000000    
   0.00000000    
   0.00000000    
   0.00000000    
   0.00000000    
   0.00000000    
   0.00000000    
   0.00000000    
   0.00000000    
   0.00000000    
   0.00000000    
   0.00000000    
   0.00000000    
   0.00000000    
   0.00000000    
   0.00000000    
   0.00000000    
   0.00000000    
   0.00000000    
   0.00000000    
   0.00000000    
   0.00000000    
   0.00000000    
   0.00000000    
   0.00000000    
   0.00000000    
   0.00000000    
   0.00000000    
   0.00000000    
   0.00000000    
   0.00000000    
   0.00000000    
   0.00000000    
   0.00000000    
   0.00000000    
   0.00000000    
   0.00000000    
   0.00000000    
   0.00000000    
   0.00000000    
   0.00000000    
   0.00000000    
   0.00000000    
   0.00000000    
   0.00000000    
   0.00000000    
   0.00000000    
   0.00000000    
   0.00000000    
   0.00000000    
   0.00000000    
   0.00000000    
   0.00000000    
   0.00000000    
   0.00000000    
   0.00000000    
   0.00000000    
   0.00000000    
   0.00000000    
   0.00000000    
   0.00000000    
   0.00000000    
   0.00000000    
   0.00000000    
   0.00000000    
   0.00000000    
   0.00000000    
   0.00000000    
   0.00000000    
   0.00000000    
   0.00000000    
   0.00000000    
   0.00000000    
   0.00000000    
   0.00000000    
   0.00000000    
   0.00000000    
   0.00000000    
   0.00000000    
   0.00000000    
   0.00000000    
   0.00000000    
   0.00000000    
   0.00000000    
   0.00000000    
   0.00000000    
   0.00000000    
   0.00000000    
   0.00000000    
   0.00000000    
   0.00000000    
   0.00000000    
   0.00000000    
   0.00000000    
   0.00000000    
   0.00000000    
   0.00000000    
   0.00000000    
   0.00000000    
   0.00000000    
   0.00000000    
   0.00000000    
   0.00000000    
   0.00000000    
   0.00000000    
   0.00000000    
   0.00000000    
   0.00000000    
   0.00000000    
   0.00000000    
   0.00000000    
   0.00000000    
   0.00000000    
   0.00000000    
   0.00000000    
   0.00000000    
   0.00000000    
   0.00000000    
   0.00000000    
   0.00000000    
   0.00000000    
   0.00000000    
   0.00000000    
   0.00000000    
   0.00000000    
   0.00000000    
   0.00000000    
   0.00000000    
   0.00000000    
   0.00000000    
   0.00000000    
   0.00000000    
   0.00000000    
   0.00000000    
   0.00000000    
   0.00000000    
   0.00000000    
   0.00000000    
   0.00000000    
   0.00000000    
   0.00000000    
   0.00000000    
   0.00000000    
   0.00000000    
   0.00000000    
   0.00000000    
   0.00000000    
   0.00000000    
   0.00000000    
   0.00000000    
   0.00000000    
   0.00000000    
   0.00000000    
   0.00000000    
   0.00000000    
   0.00000000    
   0.00000000    
   0.00000000    
   0.00000000    
   0.00000000    
   0.00000000    
   0.00000000    
   0.00000000    
   0.00000000    
   0.00000000    
   0.00000000    
   0.00000000    
   0.00000000    
   0.00000000    
   0.00000000    
   0.00000000    
   0.00000000    
   0.00000000    
   0.00000000    
   0.00000000    
   0.00000000    
   0.00000000    
   0.00000000    
   0.00000000    
   0.00000000    
   0.00000000    
   0.00000000    
   0.00000000    
   0.00000000    
   0.00000000    
   0.00000000    
   0.00000000    
   0.00000000    
   0.00000000    
   0.00000000    
   0.00000000    
   0.00000000    
   0.00000000    
   0.00000000    
   0.00000000    
   0.00000000    
   0.00000000    
   0.00000000    
   0.00000000    
   0.00000000    
   0.00000000    
   0.00000000    
   0.00000000    
   0.00000000    
   0.00000000    
   0.00000000    
   0.00000000    
   0.00000000    
   0.00000000    
   0.00000000    
   0.00000000    
   0.00000000    
   0.00000000    
   0.00000000    
   0.00000000    
   0.00000000    
   0.00000000    
   0.00000000    
   0.00000000    
   0.00000000    
   0.00000000    
   0.00000000    
   0.00000000    
   0.00000000    
   0.00000000    
   0.00000000    
   0.00000000    
   0.00000000    
   0.00000000    
   0.00000000    
   0.00000000    
   0.00000000    
   0.00000000    
   0.00000000    
   0.00000000    
   0.00000000    
   0.00000000    
   0.00000000    
   0.00000000    
   0.00000000    
   0.00000000    
   0.00000000    
   0.00000000    
   0.00000000    
   0.00000000    
   0.00000000    
   0.00000000    
   0.00000000    
   0.00000000    
   0.00000000    
   0.00000000    
   0.00000000    
   0.00000000    
   0.00000000    
   0.00000000    
   0.00000000    
   0.00000000    
   0.00000000    
   0.00000000    
   0.00000000    
   0.00000000    
   0.00000000    
   0.00000000    
   0.00000000    
   0.00000000    
   0.00000000    
   0.00000000    
   0.00000000    
   0.00000000    
   0.00000000    
   0.00000000    
   0.00000000    
   0.00000000    
   0.00000000    
   0.00000000    
   0.00000000    
   0.00000000    
   0.00000000    
   0.00000000    
   0.00000000    
   0.00000000    
   0.00000000    
   0.00000000    
   0.00000000    
   0.00000000    
   0.00000000    
   0.00000000    
   0.00000000    
   0.00000000    
   0.00000000    
   0.00000000    
   0.00000000    
   0.00000000    
   0.00000000    
   0.00000000    
   0.00000000    
   0.00000000    
   0.00000000    
   0.00000000    
   0.00000000    
   0.00000000    
   0.00000000    
   0.00000000    
   0.00000000    
   0.00000000    
   0.00000000    
   0.00000000    
   0.00000000    
   0.00000000    
   0.00000000    
   0.00000000    
   0.00000000    
   0.00000000    
   0.00000000    
   0.00000000    
   0.00000000    
   0.00000000    
   0.00000000    
   0.00000000    
   0.00000000    
   0.00000000    
   0.00000000    
   0.00000000    
   0.00000000    
   0.00000000    
   0.00000000    
   0.00000000    
   0.00000000    
   0.00000000    
   0.00000000    
   0.00000000    
   0.00000000    
   0.00000000    
   0.00000000    
   0.00000000    
   0.00000000    
   0.00000000    
   0.00000000    
   0.00000000    
   0.00000000    
   0.00000000    
   0.00000000    
   0.00000000    
   0.00000000    
   0.00000000    
   0.00000000    
   0.00000000    
   0.00000000    
   0.00000000    
   0.00000000    
   0.00000000    
   0.00000000    
   0.00000000    
   0.00000000    
   0.00000000    
   0.00000000    
   0.00000000    
   0.00000000    
   0.00000000    
   0.00000000    
   0.00000000    
   0.00000000    
   0.00000000    
   0.00000000    
   0.00000000    
   0.00000000    
   0.00000000    
   0.00000000    
   0.00000000    
   0.00000000    
   0.00000000    
   0.00000000    
   0.00000000    
   0.00000000    
   0.00000000    
   0.00000000    
   0.00000000    
   0.00000000    
   0.00000000    
   0.00000000    
   0.00000000    
   0.00000000    
   0.00000000    
   0.00000000    
   0.00000000    
   0.00000000    
   0.00000000    
   0.00000000    
   0.00000000    
   0.00000000    
   0.00000000    
   0.00000000    
   0.00000000    
   0.00000000    
   0.00000000    
   0.00000000    
   0.00000000    
   0.00000000    
   0.00000000    
   0.00000000    
   0.00000000    
   0.00000000    
   0.00000000    
   0.00000000    
   0.00000000    
   0.00000000    
   0.00000000    
   0.00000000    
   0.00000000    
   0.00000000    
   0.00000000    
   0.00000000    
   0.00000000    
   0.00000000    
   0.00000000    
   0.00000000    
   0.00000000    
   0.00000000    
   0.00000000    
   0.00000000    
   0.00000000    
   0.00000000    
   0.00000000    
   0.00000000    
   0.00000000    
   0.00000000    
   0.00000000    
   0.00000000    
   0.00000000    
   0.00000000    
   0.00000000    
   0.00000000    
   0.00000000    
   0.00000000    
   0.00000000    
   0.00000000    
   0.00000000    
   0.00000000    
   0.00000000    
   0.00000000    
   0.00000000    
   0.00000000    
   0.00000000    
   0.00000000    
   0.00000000    
   0.00000000    
   0.00000000    
   0.00000000    
   0.00000000    
   0.00000000    
   0.00000000    
   0.00000000    
   0.00000000    
   0.00000000    
   0.00000000    
   0.00000000    
   0.00000000    
   0.00000000    
   0.00000000    
   0.00000000    
   0.00000000    
   0.00000000    
   0.00000000    
   0.00000000    
   0.00000000    
   0.00000000    
   0.00000000    
   0.00000000    
   0.00000000    
   0.00000000    
   0.00000000    
   0.00000000    
   0.00000000    
   0.00000000    
   0.00000000    
   0.00000000    
   0.00000000    
   0.00000000    
   0.00000000    
   0.00000000    
   0.00000000    
   0.00000000    
   0.00000000    
   0.00000000    
   0.00000000    
   0.00000000    
   0.00000000    
   0.00000000    
   0.00000000    
   0.00000000    
   0.00000000    
   0.00000000    
   0.00000000    
   0.00000000    
   0.00000000    
   0.00000000    
   0.00000000    
   0.00000000    
   0.00000000    
   0.00000000    
   0.00000000    
   0.00000000    
   0.00000000    
   0.00000000    
   0.00000000    
   0.00000000    
   0.00000000    
   0.00000000    
   0.00000000    
   0.00000000    
   0.00000000    
   0.00000000    
   0.00000000    
   0.00000000    
   0.00000000    
   0.00000000    
   0.00000000    
   0.00000000    
   0.00000000    
   0.00000000    
   0.00000000    
   0.00000000    
   0.00000000    
   0.00000000    
   0.00000000    
   0.00000000    
   0.00000000    
   0.00000000    
   0.00000000    
   0.00000000    
   0.00000000    
   0.00000000    
   0.00000000    
   0.00000000    
   0.00000000    
   0.00000000    
   0.00000000    
   0.00000000    
   0.00000000    
   0.00000000    
   0.00000000    
   0.00000000    
   0.00000000    
   0.00000000    
   0.00000000    
   0.00000000    
   0.00000000    
   0.00000000    
   0.00000000    
   0.00000000    
   0.00000000    
   0.00000000    
   0.00000000    
   0.00000000    
   0.00000000    
   0.00000000    
   0.00000000    
   0.00000000    
   0.00000000    
   0.00000000    
   0.00000000    
   0.00000000    
   0.00000000    
   0.00000000    
   0.00000000    
   0.00000000    
   0.00000000    
   0.00000000    
   0.00000000    
   0.00000000    
   0.00000000    
   0.00000000    
   0.00000000    
   0.00000000    
   0.00000000    
   0.00000000    
   0.00000000    
   0.00000000    
   0.00000000    
   0.00000000    
   0.00000000    
   0.00000000    
   0.00000000    
   0.00000000    
   0.00000000    
   0.00000000    
   0.00000000    
   0.00000000    
   0.00000000    
   0.00000000    
   0.00000000    
   0.00000000    
   0.00000000    
   0.00000000    
   0.00000000    
   0.00000000    
   0.00000000    
   0.00000000    
   0.00000000    
   0.00000000    
   0.00000000    
   0.00000000    
   0.00000000    
   0.00000000    
   0.00000000    
   0.00000000    
   0.00000000    
   0.00000000    
   0.00000000    
   0.00000000    
   0.00000000    
   0.00000000    
   0.00000000    
   0.00000000    
   0.00000000    
   0.00000000    
   0.00000000    
   0.00000000    
   0.00000000    
   0.00000000    
   0.00000000    
   0.00000000    
   0.00000000    
   0.00000000    
   0.00000000    
   0.00000000    
   0.00000000    
   0.00000000    
   0.00000000    
   0.00000000    
   0.00000000    
   0.00000000    
   0.00000000    
   0.00000000    
   0.00000000    
   0.00000000    
   0.00000000    
   0.00000000    
   0.00000000    
   0.00000000    
   0.00000000    
   0.00000000    
   0.00000000    
   0.00000000    
   0.00000000    
   0.00000000    
   0.00000000    
   0.00000000    
   0.00000000    
   0.00000000    
   0.00000000    
   0.00000000    
   0.00000000    
   0.00000000    
   0.00000000    
   0.00000000    
   0.00000000    
   0.00000000    
   0.00000000    
   0.00000000    
   0.00000000    
   0.00000000    
   0.00000000    
   0.00000000    
   0.00000000    
   0.00000000    
   0.00000000    
   0.00000000    
   0.00000000    
   0.00000000    
   0.00000000    
   0.00000000    
   0.00000000    
   0.00000000    
   0.00000000    
   0.00000000    
   0.00000000    
   0.00000000    
   0.00000000    
   0.00000000    
   0.00000000    
   0.00000000    
   0.00000000    
   0.00000000    
   0.00000000    
   0.00000000    
   0.00000000    
   0.00000000    
   0.00000000    
   0.00000000    
   0.00000000    
   0.00000000    
   0.00000000    
   0.00000000    
   0.00000000    
   0.00000000    
   0.00000000    
   0.00000000    
   0.00000000    
   0.00000000    
   0.00000000    
   0.00000000    
   0.00000000    
   0.00000000    
   0.00000000    
   0.00000000    
   0.00000000    
   0.00000000    
   0.00000000    
   0.00000000    
   0.00000000    
   0.00000000    
   0.00000000    
   0.00000000    
   0.00000000    
   0.00000000    
   0.00000000    
   0.00000000    
   0.00000000    
   0.00000000    
   0.00000000    
   0.00000000    
   0.00000000    
   0.00000000    
   0.00000000    
   0.00000000    
   0.00000000    
   0.00000000    
   0.00000000    
   0.00000000    
   0.00000000    
   0.00000000    
   0.00000000    
   0.00000000    
   0.00000000    
   0.00000000    
   0.00000000    
   0.00000000    
   0.00000000    
   0.00000000    
   0.00000000    
   0.00000000    
   0.00000000    
   0.00000000    
   0.00000000    
   0.00000000    
   0.00000000    
   0.00000000    
   0.00000000    
   0.00000000    
   0.00000000    
   0.00000000    
   0.00000000    
   0.00000000    
   0.00000000    
   0.00000000    
   0.00000000    
   0.00000000    
   0.00000000    
   0.00000000    
   0.00000000    
   0.00000000    
   0.00000000    
   0.00000000    
   0.00000000    
   0.00000000    
   0.00000000    
   0.00000000    
   0.00000000    
   0.00000000    
   0.00000000    
   0.00000000    
   0.00000000    
   0.00000000    
   0.00000000    
   0.00000000    
   0.00000000    
   0.00000000    
   0.00000000    
   0.00000000    
   0.00000000    
   0.00000000    
   0.00000000    
   0.00000000    
   0.00000000    
   0.00000000    
   0.00000000    
   0.00000000    
   0.00000000    
   0.00000000    
   0.00000000    
   0.00000000    
   0.00000000    
   0.00000000    
   0.00000000    
   0.00000000    
   0.00000000    
   0.00000000    
   0.00000000    
   0.00000000    
   0.00000000    
   0.00000000    
   0.00000000    
   0.00000000    
   0.00000000    
   0.00000000    
   0.00000000    
   0.00000000    
   0.00000000    
   0.00000000    
   0.00000000    
   0.00000000    
   0.00000000    
   0.00000000    
   0.00000000    
   0.00000000    
   0.00000000    
   0.00000000    
   0.00000000    
   0.00000000    
   0.00000000    
   0.00000000    
   0.00000000    
   0.00000000    
   0.00000000    
   0.00000000    
   0.00000000    
   0.00000000    
   0.00000000    
   0.00000000    
   0.00000000    
   0.00000000    
   0.00000000    
   0.00000000    
   0.00000000    
   0.00000000    
   0.00000000    
   0.00000000    
   0.00000000    
   0.00000000    
   0.00000000    
   0.00000000    
   0.00000000    
   0.00000000    
   0.00000000    
   0.00000000    
   0.00000000    
   0.00000000    
   0.00000000    
   0.00000000    
   0.00000000    
   0.00000000    
   0.00000000    
   0.00000000    
   0.00000000    
   0.00000000    
   0.00000000    
   0.00000000    
   0.00000000    
   0.00000000    
   0.00000000    
   0.00000000    
   0.00000000    
   0.00000000    
   0.00000000    
   0.00000000    
   0.00000000    
   0.00000000    
   0.00000000    
   0.00000000    
   0.00000000    
   0.00000000    
   0.00000000    
   0.00000000    
   0.00000000    
   0.00000000    
   0.00000000    
   0.00000000    
   0.00000000    
   0.00000000    
   0.00000000    
   0.00000000    
   0.00000000    
   0.00000000    
   0.00000000    
   0.00000000    
   0.00000000    
   0.00000000    
   0.00000000    
   0.00000000    
   0.00000000    
   0.00000000    
   0.00000000    
   0.00000000    
   0.00000000    
   0.00000000    
   0.00000000    
   0.00000000    
   0.00000000    
   0.00000000    
   0.00000000    
   0.00000000    
   0.00000000    
   0.00000000    
   0.00000000    
   0.00000000    
   0.00000000    
   0.00000000    
   0.00000000    
   0.00000000    
   0.00000000    
   0.00000000    
   0.00000000    
   0.00000000    
   0.00000000    
   0.00000000    
   0.00000000    
   0.00000000    
   0.00000000    
   0.00000000    
   0.00000000    
   0.00000000    
   0.00000000    
   0.00000000    
   0.00000000    
   0.00000000    
   0.00000000    
   0.00000000    
   0.00000000    
   0.00000000    
   0.00000000    
   0.00000000    
   0.00000000    
   0.00000000    
   0.00000000    
   0.00000000    
   0.00000000    
   0.00000000    
   0.00000000    
   0.00000000    
   0.00000000    
   0.00000000    
   0.00000000    
   0.00000000    
   0.00000000    
   0.00000000    
   0.00000000    
   0.00000000    
   0.00000000    
   0.00000000    
   0.00000000    
   0.00000000    
   0.00000000    
   0.00000000    
   0.00000000    
   0.00000000    
   0.00000000    
   0.00000000    
   0.00000000    
   0.00000000    
   0.00000000    
   0.00000000    
   0.00000000    
   0.00000000    
   0.00000000    
   0.00000000    
   0.00000000    
   0.00000000    
   0.00000000    
   0.00000000    
   0.00000000    
   0.00000000    
   0.00000000    
   0.00000000    
   0.00000000    
   0.00000000    
   0.00000000    
   0.00000000    
   0.00000000    
   0.00000000    
   0.00000000    
   0.00000000    
   0.00000000    
   0.00000000    
   0.00000000    
   0.00000000    
   0.00000000    
   0.00000000    
   0.00000000    
   0.00000000    
   0.00000000    
   0.00000000    
   0.00000000    
   0.00000000    
   0.00000000    
   0.00000000    
   0.00000000    
   0.00000000    
   0.00000000    
   0.00000000    
   0.00000000    
   0.00000000    
   0.00000000    
   0.00000000    
   0.00000000    
   0.00000000    
   0.00000000    
   0.00000000    
   0.00000000    
   0.00000000    
   0.00000000    
   0.00000000    
   0.00000000    
   0.00000000    
   0.00000000    
   0.00000000    
   0.00000000    
   0.00000000    
   0.00000000    
   0.00000000    
   0.00000000    
   0.00000000    
   0.00000000    
   0.00000000    
   0.00000000    
   0.00000000    
   0.00000000    
   0.00000000    
   0.00000000    
   0.00000000    
   0.00000000    
   0.00000000    
   0.00000000    
   0.00000000    
   0.00000000    
   0.00000000    
   0.00000000    
   0.00000000    
   0.00000000    
   0.00000000    
   0.00000000    
   0.00000000    
   0.00000000    
   0.00000000    
   0.00000000    
   0.00000000    
   0.00000000    
   0.00000000    
   0.00000000    
   0.00000000    
   0.00000000    
   0.00000000    
   0.00000000    
   0.00000000    
   0.00000000    
   0.00000000    
   0.00000000    
   0.00000000    
   0.00000000    
   0.00000000    
   0.00000000    
   0.00000000    
   0.00000000    
   0.00000000    
   0.00000000    
   0.00000000    
   0.00000000    
   0.00000000    
   0.00000000    
   0.00000000    
   0.00000000    
   0.00000000    
   0.00000000    
   0.00000000    
   0.00000000    
   0.00000000    
   0.00000000    
   0.00000000    
   0.00000000    
   0.00000000    
   0.00000000    
   0.00000000    
   0.00000000    
   0.00000000    
   0.00000000    
   0.00000000    
   0.00000000    
   0.00000000    
   0.00000000    
   0.00000000    
   0.00000000    
   0.00000000    
   0.00000000    
   0.00000000    
   0.00000000    
   0.00000000    
   0.00000000    
   0.00000000    
   0.00000000    
   0.00000000    
   0.00000000    
   0.00000000    
   0.00000000    
   0.00000000    
   0.00000000    
   0.00000000    
   0.00000000    
   0.00000000    
   0.00000000    
   0.00000000    
   0.00000000    
   0.00000000    
   0.00000000    
   0.00000000    
   0.00000000    
   0.00000000    
   0.00000000    
   0.00000000    
   0.00000000    
   0.00000000    
   0.00000000    
   0.00000000    
   0.00000000    
   0.00000000    
   0.00000000    
   0.00000000    
   0.00000000    
   0.00000000    
   0.00000000    
   0.00000000    
   0.00000000    
   0.00000000    
   0.00000000    
   0.00000000    
   0.00000000    
   0.00000000    
   0.00000000    
   0.00000000    
   0.00000000    
   0.00000000    
   0.00000000    
   0.00000000    
   0.00000000    
   0.00000000    
   0.00000000    
   0.00000000    
   0.00000000    
   0.00000000    
   0.00000000    
   0.00000000    
   0.00000000    
   0.00000000    
   0.00000000    
   0.00000000    
   0.00000000    
   0.00000000    
   0.00000000    
   0.00000000    
   0.00000000    
   0.00000000    
   0.00000000    
   0.00000000    
   0.00000000    
   0.00000000    
   0.00000000    
   0.00000000    
   0.00000000    
   0.00000000    
   0.00000000    
   0.00000000    
   0.00000000    
   0.00000000    
   0.00000000    
   0.00000000    
   0.00000000    
   0.00000000    
   0.00000000    
   0.00000000    
   0.00000000    
   0.00000000    
   0.00000000    
   0.00000000    
   0.00000000    
   0.00000000    
   0.00000000    
   0.00000000    
   0.00000000    
   0.00000000    
   0.00000000    
   0.00000000    
   0.00000000    
   0.00000000    
   0.00000000    
   0.00000000    
   0.00000000    
   0.00000000    
   0.00000000    
   0.00000000    
   0.00000000    
   0.00000000    
   0.00000000    
   0.00000000    
   0.00000000    
   0.00000000    
   0.00000000    
   0.00000000    
   0.00000000    
   0.00000000    
   0.00000000    
   0.00000000    
   0.00000000    
   0.00000000    
   0.00000000    
   0.00000000    
   0.00000000    
   0.00000000    
   0.00000000    
   0.00000000    
   0.00000000    
   0.00000000    
   0.00000000    
   0.00000000    
   0.00000000    
   0.00000000    
   0.00000000    
   0.00000000    
   0.00000000    
   0.00000000    
   0.00000000    
   0.00000000    
   0.00000000    
   0.00000000    
   0.00000000    
   0.00000000    
   0.00000000    
   0.00000000    
   0.00000000    
   0.00000000    
   0.00000000    
   0.00000000    
   0.00000000    
   0.00000000    
   0.00000000    
   0.00000000    
   0.00000000    
   0.00000000    
   0.00000000    
   0.00000000    
   0.00000000    
   0.00000000    
   0.00000000    
   0.00000000    
   0.00000000    
   0.00000000    
   0.00000000    
   0.00000000    
   0.00000000    
   0.00000000    
   0.00000000    
   0.00000000    
   0.00000000    
   0.00000000    
   0.00000000    
   0.00000000    
   0.00000000    
   0.00000000    
   0.00000000    
   0.00000000    
   0.00000000    
   0.00000000    
   0.00000000    
   0.00000000    
   0.00000000    
   0.00000000    
   0.00000000    
   0.00000000    
   0.00000000    
   0.00000000    
   0.00000000    
   0.00000000    
   0.00000000    
   0.00000000    
   0.00000000    
   0.00000000    
   0.00000000    
   0.00000000    
   0.00000000    
   0.00000000    
   0.00000000    
   0.00000000    
   0.00000000    
   0.00000000    
   0.00000000    
   0.00000000    
   0.00000000    
   0.00000000    
   0.00000000    
   0.00000000    
   0.00000000    
   0.00000000    
   0.00000000    
   0.00000000    
   0.00000000    
   0.00000000    
   0.00000000    
   0.00000000    
   0.00000000    
   0.00000000    
   0.00000000    
   0.00000000    
   0.00000000    
   0.00000000    
   0.00000000    
   0.00000000    
   0.00000000    
   0.00000000    
   0.00000000    
   0.00000000    
   0.00000000    
   0.00000000    
   0.00000000    
   0.00000000    
   0.00000000    
   0.00000000    
   0.00000000    
   0.00000000    
   0.00000000    
   0.00000000    
   0.00000000    
   0.00000000    
   0.00000000    
   1.00000000    
   1.00000000    
   0.00000000    
   1.00000000    
   0.00000000    
   0.00000000    
   0.00000000    
   0.00000000    
   0.00000000    
   0.00000000    
   0.00000000    
   0.00000000    
   0.00000000    
   0.00000000    
   0.00000000    
   0.00000000    
   0.00000000    
   0.00000000    
   0.00000000    
   0.00000000    
   0.00000000    
   0.00000000    
   0.00000000    
   0.00000000    
   0.00000000    
   0.00000000    
   0.00000000    
   0.00000000    
   0.00000000    
   0.00000000    
   0.00000000    
   0.00000000    
   0.00000000    
   0.00000000    
   0.00000000    
   0.00000000    
   0.00000000    
   0.00000000    
   0.00000000    
   0.00000000    
   0.00000000    
   0.00000000    
   0.00000000    
   0.00000000    
   0.00000000    
   0.00000000    
   0.00000000    
   0.00000000    
   0.00000000    
   0.00000000    
   0.00000000    
   0.00000000    
   0.00000000    
   0.00000000    
   0.00000000    
   0.00000000    
   0.00000000    
   0.00000000    
   0.00000000    
   0.00000000    
   0.00000000    
   0.00000000    
   0.00000000    
   0.00000000    
   1.00000000    
   0.00000000    
   0.00000000    
   0.00000000    
   0.00000000    
   0.00000000    
   0.00000000    
   0.00000000    
   0.00000000    
   0.00000000    
   1.00000000    
   0.00000000    
   0.00000000    
   0.00000000    
   0.00000000    
   0.00000000    
   0.00000000    
   0.00000000    
   0.00000000    
   0.00000000    
   0.00000000    
   0.00000000    
   0.00000000    
   0.00000000    
   0.00000000    
   0.00000000    
   0.00000000    
   0.00000000    
   0.00000000    
   0.00000000    
   0.00000000    
   0.00000000    
   0.00000000    
   0.00000000    
   0.00000000    
   0.00000000    
   0.00000000    
   0.00000000    
   0.00000000    
   0.00000000    
   0.00000000    
   0.00000000    
   0.00000000    
   0.00000000    
   0.00000000    
   0.00000000    
   0.00000000    
   0.00000000    
   0.00000000    
   0.00000000    
   0.00000000    
   0.00000000    
   0.00000000    
   0.00000000    
   0.00000000    
   0.00000000    
   0.00000000    
   0.00000000    
   0.00000000    
   1.00000000    
   0.00000000    
   0.00000000    
   2.00000000    
   1.00000000    
   1.00000000    
   0.00000000    
   1.00000000    
   0.00000000    
   0.00000000    
   0.00000000    
   0.00000000    
   0.00000000    
   0.00000000    
   0.00000000    
   0.00000000    
   0.00000000    
   0.00000000    
   0.00000000    
   0.00000000    
   0.00000000    
   0.00000000    
   0.00000000    
   0.00000000    
   0.00000000    
   0.00000000    
   0.00000000    
   0.00000000    
   0.00000000    
   0.00000000    
   0.00000000    
   0.00000000    
   0.00000000    
   0.00000000    
   0.00000000    
   0.00000000    
   0.00000000    
   0.00000000    
   0.00000000    
   0.00000000    
   0.00000000    
   0.00000000    
   0.00000000    
   0.00000000    
   0.00000000    
   0.00000000    
   0.00000000    
   0.00000000    
   0.00000000    
   0.00000000    
   0.00000000    
   0.00000000    
   0.00000000    
   0.00000000    
   0.00000000    
   0.00000000    
   0.00000000    
   0.00000000    
   0.00000000    
   0.00000000    
   0.00000000    
   0.00000000    
   0.00000000    
   0.00000000    
   0.00000000    
   0.00000000    
   1.00000000    
   0.00000000    
   0.00000000    
   0.00000000    
   1.00000000    
   0.00000000    
   0.00000000    
   0.00000000    
   0.00000000    
   0.00000000    
   0.00000000    
   0.00000000    
   0.00000000    
   0.00000000    
   0.00000000    
   0.00000000    
   0.00000000    
   0.00000000    
   0.00000000    
   0.00000000    
   0.00000000    
   0.00000000    
   0.00000000    
   0.00000000    
   0.00000000    
   0.00000000    
   0.00000000    
   0.00000000    
   0.00000000    
   0.00000000    
   0.00000000    
   0.00000000    
   0.00000000    
   0.00000000    
   0.00000000    
   0.00000000    
   0.00000000    
   0.00000000    
   0.00000000    
   0.00000000    
   0.00000000    
   0.00000000    
   0.00000000    
   0.00000000    
   0.00000000    
   0.00000000    
   0.00000000    
   0.00000000    
   0.00000000    
   0.00000000    
   0.00000000    
   0.00000000    
   0.00000000    
   0.00000000    
   0.00000000    
   0.00000000    
   0.00000000    
   0.00000000    
   0.00000000    
   0.00000000    
   0.00000000    
   0.00000000    
   0.00000000    
   0.00000000    
   0.00000000    
   1.00000000    
   1.00000000    
   0.00000000    
   0.00000000    
   0.00000000    
   0.00000000    
   0.00000000    
   0.00000000    
   0.00000000    
   0.00000000    
   1.00000000    
   0.00000000    
   0.00000000    
   0.00000000    
   0.00000000    
   0.00000000    
   0.00000000    
   0.00000000    
   0.00000000    
   0.00000000    
   0.00000000    
   0.00000000    
   0.00000000    
   0.00000000    
   0.00000000    
   0.00000000    
   0.00000000    
   0.00000000    
   0.00000000    
   0.00000000    
   0.00000000    
   0.00000000    
   0.00000000    
   0.00000000    
   0.00000000    
   0.00000000    
   0.00000000    
   0.00000000    
   0.00000000    
   0.00000000    
   0.00000000    
   0.00000000    
   0.00000000    
   0.00000000    
   0.00000000    
   0.00000000    
   0.00000000    
   0.00000000    
   0.00000000    
   0.00000000    
   0.00000000    
   0.00000000    
   0.00000000    
   0.00000000    
   0.00000000    
   0.00000000    
   0.00000000    
   0.00000000    
   0.00000000    
   0.00000000    
   0.00000000    
   0.00000000    
   0.00000000    
   0.00000000    
   0.00000000    
   0.00000000    
   0.00000000    
   0.00000000    
   0.00000000    
   0.00000000    
   0.00000000    
   1.00000000    
   0.00000000    
   0.00000000    
   0.00000000    
   1.00000000    
   0.00000000    
   0.00000000    
   0.00000000    
   0.00000000    
   0.00000000    
   0.00000000    
   0.00000000    
   0.00000000    
   0.00000000    
   0.00000000    
   0.00000000    
   0.00000000    
   0.00000000    
   0.00000000    
   0.00000000    
   0.00000000    
   0.00000000    
   0.00000000    
   0.00000000    
   0.00000000    
   0.00000000    
   0.00000000    
   0.00000000    
   0.00000000    
   0.00000000    
   0.00000000    
   0.00000000    
   0.00000000    
   0.00000000    
   0.00000000    
   0.00000000    
   0.00000000    
   0.00000000    
   0.00000000    
   0.00000000    
   0.00000000    
   0.00000000    
   0.00000000    
   0.00000000    
   0.00000000    
   0.00000000    
   0.00000000    
   0.00000000    
   0.00000000    
   0.00000000    
   0.00000000    
   0.00000000    
   0.00000000    
   1.00000000    
   0.00000000    
   0.00000000    
   0.00000000    
   0.00000000    
   0.00000000    
   0.00000000    
   0.00000000    
   0.00000000    
   0.00000000    
   1.00000000    
   0.00000000    
   0.00000000    
   0.00000000    
   0.00000000    
   0.00000000    
   0.00000000    
   0.00000000    
   0.00000000    
   0.00000000    
   0.00000000    
   0.00000000    
   0.00000000    
   0.00000000    
   0.00000000    
   0.00000000    
   0.00000000    
   0.00000000    
   0.00000000    
   0.00000000    
   0.00000000    
   0.00000000    
   0.00000000    
   0.00000000    
   0.00000000    
   0.00000000    
   0.00000000    
   0.00000000    
   0.00000000    
   0.00000000    
   0.00000000    
   0.00000000    
   0.00000000    
   0.00000000    
   0.00000000    
   0.00000000    
   0.00000000    
   0.00000000    
   0.00000000    
   0.00000000    
   0.00000000    
   0.00000000    
   0.00000000    
   0.00000000    
   0.00000000    
   0.00000000    
   0.00000000    
   0.00000000    
   0.00000000    
   0.00000000    
   0.00000000    
   0.00000000    
   0.00000000    
   0.00000000    
   0.00000000    
   0.00000000    
   0.00000000    
   0.00000000    
   1.00000000    
   0.00000000    
   1.00000000    
   1.00000000    
   0.00000000    
   0.00000000    
   0.00000000    
   1.00000000    
   0.00000000    
   0.00000000    
   0.00000000    
   0.00000000    
   0.00000000    
   0.00000000    
   0.00000000    
   0.00000000    
   0.00000000    
   0.00000000    
   0.00000000    
   0.00000000    
   0.00000000    
   0.00000000    
   0.00000000    
   0.00000000    
   0.00000000    
   0.00000000    
   0.00000000    
   0.00000000    
   0.00000000    
   0.00000000    
   0.00000000    
   0.00000000    
   0.00000000    
   0.00000000    
   0.00000000    
   0.00000000    
   0.00000000    
   0.00000000    
   0.00000000    
   0.00000000    
   0.00000000    
   0.00000000    
   0.00000000    
   0.00000000    
   0.00000000    
   0.00000000    
   0.00000000    
   0.00000000    
   0.00000000    
   0.00000000    
   0.00000000    
   0.00000000    
   0.00000000    
   0.00000000    
   0.00000000    
   0.00000000    
   0.00000000    
   0.00000000    
   0.00000000    
   0.00000000    
   0.00000000    
   0.00000000    
   0.00000000    
   0.00000000    
   0.00000000    
   0.00000000    
   0.00000000    
   0.00000000    
   0.00000000    
   1.00000000    
   0.00000000    
   0.00000000    
   0.00000000    
   0.00000000    
   0.00000000    
   0.00000000    
   0.00000000    
   0.00000000    
   0.00000000    
   0.00000000    
   0.00000000    
   0.00000000    
   0.00000000    
   0.00000000    
   0.00000000    
   0.00000000    
   0.00000000    
   0.00000000    
   0.00000000    
   0.00000000    
   0.00000000    
   0.00000000    
   0.00000000    
   0.00000000    
   0.00000000    
   0.00000000    
   0.00000000    
   0.00000000    
   0.00000000    
   0.00000000    
   0.00000000    
   0.00000000    
   0.00000000    
   0.00000000    
   0.00000000    
   0.00000000    
   0.00000000    
   0.00000000    
   0.00000000    
   0.00000000    
   0.00000000    
   0.00000000    
   0.00000000    
   0.00000000    
   0.00000000    
   0.00000000    
   0.00000000    
   0.00000000    
   0.00000000    
   0.00000000    
   0.00000000    
   0.00000000    
   0.00000000    
   0.00000000    
   0.00000000    
   0.00000000    
   0.00000000    
   2.00000000    
   0.00000000    
   0.00000000    
   0.00000000    
   0.00000000    
   0.00000000    
   1.00000000    
   0.00000000    
   0.00000000    
   1.00000000    
   0.00000000    
   0.00000000    
   0.00000000    
   0.00000000    
   0.00000000    
   0.00000000    
   0.00000000    
   0.00000000    
   0.00000000    
   0.00000000    
   0.00000000    
   0.00000000    
   0.00000000    
   0.00000000    
   0.00000000    
   0.00000000    
   0.00000000    
   0.00000000    
   0.00000000    
   0.00000000    
   0.00000000    
   0.00000000    
   0.00000000    
   0.00000000    
   0.00000000    
   0.00000000    
   0.00000000    
   0.00000000    
   0.00000000    
   0.00000000    
   0.00000000    
   0.00000000    
   0.00000000    
   0.00000000    
   0.00000000    
   0.00000000    
   0.00000000    
   0.00000000    
   0.00000000    
   0.00000000    
   0.00000000    
   0.00000000    
   0.00000000    
   0.00000000    
   0.00000000    
   0.00000000    
   0.00000000    
   0.00000000    
   0.00000000    
   0.00000000    
   0.00000000    
   0.00000000    
   0.00000000    
   0.00000000    
   0.00000000    
   1.00000000    
   0.00000000    
   0.00000000    
   0.00000000    
   0.00000000    
   1.00000000    
   1.00000000    
   0.00000000    
   0.00000000    
   0.00000000    
   0.00000000    
   0.00000000    
   0.00000000    
   0.00000000    
   0.00000000    
   0.00000000    
   0.00000000    
   0.00000000    
   0.00000000    
   0.00000000    
   0.00000000    
   0.00000000    
   0.00000000    
   0.00000000    
   0.00000000    
   0.00000000    
   0.00000000    
   0.00000000    
   0.00000000    
   0.00000000    
   0.00000000    
   0.00000000    
   0.00000000    
   0.00000000    
   0.00000000    
   0.00000000    
   0.00000000    
   0.00000000    
   0.00000000    
   0.00000000    
   0.00000000    
   0.00000000    
   0.00000000    
   0.00000000    
   0.00000000    
   0.00000000    
   0.00000000    
   0.00000000    
   0.00000000    
   0.00000000    
   0.00000000    
   0.00000000    
   0.00000000    
   0.00000000    
   0.00000000    
   0.00000000    
   0.00000000    
   0.00000000    
   0.00000000    
   0.00000000    
   0.00000000    
   0.00000000    
   0.00000000    
   0.00000000    
   0.00000000    
   0.00000000    
   0.00000000    
   1.00000000    
   0.00000000    
   0.00000000    
   0.00000000    
   0.00000000    
   1.00000000    
   0.00000000    
   0.00000000    
   0.00000000    
   0.00000000    
   0.00000000    
   0.00000000    
   0.00000000    
   0.00000000    
   0.00000000    
   0.00000000    
   0.00000000    
   0.00000000    
   0.00000000    
   0.00000000    
   0.00000000    
   0.00000000    
   0.00000000    
   0.00000000    
   0.00000000    
   0.00000000    
   0.00000000    
   0.00000000    
   0.00000000    
   0.00000000    
   0.00000000    
   0.00000000    
   0.00000000    
   0.00000000    
   0.00000000    
   0.00000000    
   0.00000000    
   0.00000000    
   0.00000000    
   0.00000000    
   0.00000000    
   0.00000000    
   0.00000000    
   0.00000000    
   0.00000000    
   0.00000000    
   0.00000000    
   0.00000000    
   0.00000000    
   0.00000000    
   0.00000000    
   0.00000000    
   0.00000000    
   0.00000000    
   0.00000000    
   0.00000000    
   0.00000000    
   0.00000000    
   0.00000000    
   0.00000000    
   0.00000000    
   0.00000000    
   0.00000000    
   1.00000000    
   1.00000000    
   0.00000000    
   0.00000000    
   0.00000000    
   0.00000000    
   0.00000000    
   0.00000000    
   0.00000000    
   0.00000000    
   0.00000000    
   0.00000000    
   0.00000000    
   0.00000000    
   0.00000000    
   0.00000000    
   0.00000000    
   0.00000000    
   0.00000000    
   0.00000000    
   0.00000000    
   0.00000000    
   0.00000000    
   0.00000000    
   0.00000000    
   0.00000000    
   0.00000000    
   0.00000000    
   0.00000000    
   0.00000000    
   0.00000000    
   0.00000000    
   0.00000000    
   0.00000000    
   0.00000000    
   0.00000000    
   0.00000000    
   0.00000000    
   0.00000000    
   0.00000000    
   0.00000000    
   0.00000000    
   0.00000000    
   0.00000000    
   0.00000000    
   0.00000000    
   0.00000000    
   0.00000000    
   0.00000000    
   0.00000000    
   0.00000000    
   0.00000000    
   0.00000000    
   0.00000000    
   0.00000000    
   0.00000000    
   0.00000000    
   0.00000000    
   0.00000000    
   0.00000000    
   0.00000000    
   0.00000000    
   0.00000000    
   0.00000000    
   0.00000000    
   1.00000000    
   0.00000000    
   0.00000000    
   0.00000000    
   0.00000000    
   0.00000000    
   0.00000000    
   0.00000000    
   0.00000000    
   0.00000000    
   0.00000000    
   0.00000000    
   0.00000000    
   0.00000000    
   0.00000000    
   0.00000000    
   0.00000000    
   0.00000000    
   0.00000000    
   0.00000000    
   0.00000000    
   0.00000000    
   0.00000000    
   0.00000000    
   0.00000000    
   0.00000000    
   0.00000000    
   0.00000000    
   0.00000000    
   0.00000000    
   0.00000000    
   0.00000000    
   0.00000000    
   0.00000000    
   0.00000000    
   0.00000000    
   0.00000000    
   0.00000000    
   0.00000000    
   0.00000000    
   0.00000000    
   0.00000000    
   0.00000000    
   0.00000000    
   0.00000000    
   0.00000000    
   0.00000000    
   0.00000000    
   0.00000000    
   0.00000000    
   0.00000000    
   0.00000000    
   0.00000000    
   0.00000000    
   0.00000000    
   0.00000000    
   0.00000000    
   0.00000000    
   0.00000000    
   0.00000000    
   0.00000000    
   0.00000000    
   0.00000000    
   0.00000000    
   0.00000000    
   0.00000000    
   0.00000000    
   0.00000000    
   0.00000000    
   0.00000000    
   0.00000000    
   0.00000000    
   0.00000000    
   0.00000000    
   0.00000000    
   0.00000000    
   0.00000000    
   0.00000000    
   0.00000000    
   0.00000000    
   0.00000000    
   0.00000000    
   0.00000000    
   0.00000000    
   0.00000000    
   0.00000000    
   0.00000000    
   0.00000000    
   0.00000000    
   0.00000000    
   0.00000000    
   0.00000000    
   0.00000000    
   0.00000000    
   0.00000000    
   0.00000000    
   0.00000000    
   0.00000000    
   0.00000000    
   0.00000000    
   0.00000000    
   0.00000000    
   0.00000000    
   0.00000000    
   0.00000000    
   0.00000000    
   0.00000000    
   0.00000000    
   0.00000000    
   0.00000000    
   0.00000000    
   0.00000000    
   0.00000000    
   0.00000000    
   0.00000000    
   0.00000000    
   0.00000000    
   0.00000000    
   0.00000000    
   0.00000000    
   0.00000000    
   0.00000000    
   0.00000000    
   0.00000000    
   0.00000000    
   0.00000000    
   0.00000000    
   0.00000000    
   0.00000000    
   0.00000000    
   0.00000000    
   0.00000000    
   0.00000000    
   0.00000000    
   0.00000000    
   0.00000000    
   0.00000000    
   0.00000000    
   0.00000000    
   0.00000000    
   0.00000000    
   0.00000000    
   0.00000000    
   0.00000000    
   0.00000000    
   0.00000000    
   0.00000000    
   0.00000000    
   0.00000000    
   0.00000000    
   0.00000000    
   0.00000000    
   0.00000000    
   0.00000000    
   0.00000000    
   0.00000000    
   0.00000000    
   0.00000000    
   0.00000000    
   0.00000000    
   0.00000000    
   0.00000000    
   0.00000000    
   0.00000000    
   0.00000000    
   0.00000000    
   0.00000000    
   0.00000000    
   0.00000000    
   0.00000000    
   0.00000000    
   0.00000000    
   0.00000000    
   0.00000000    
   0.00000000    
   0.00000000    
   0.00000000    
   0.00000000    
   0.00000000    
   0.00000000    
   0.00000000    
   0.00000000    
   0.00000000    
   0.00000000    
   0.00000000    
   0.00000000    
   0.00000000    
   0.00000000    
   0.00000000    
   0.00000000    
   0.00000000    
   0.00000000    
   0.00000000    
   0.00000000    
   0.00000000    
   0.00000000    
   0.00000000    
   0.00000000    
   0.00000000    
   0.00000000    
   0.00000000    
   0.00000000    
   0.00000000    
   0.00000000    
   0.00000000    
   0.00000000    
   0.00000000    
   0.00000000    
   0.00000000    
   0.00000000    
   0.00000000    
   0.00000000    
   0.00000000    
   0.00000000    
   0.00000000    
   0.00000000    
   0.00000000    
   0.00000000    
   0.00000000    
   0.00000000    
   0.00000000    
   0.00000000    
   0.00000000    
   0.00000000    
   0.00000000    
   0.00000000    
   0.00000000    
   0.00000000    
   0.00000000    
   0.00000000    
   0.00000000    
   0.00000000    
   0.00000000    
   0.00000000    
   0.00000000    
   0.00000000    
   0.00000000    
   0.00000000    
   0.00000000    
   0.00000000    
   0.00000000    
   0.00000000    
   0.00000000    
   0.00000000    
   0.00000000    
   0.00000000    
   0.00000000    
   0.00000000    
   0.00000000    
   0.00000000    
   0.00000000    
   0.00000000    
   0.00000000    
   0.00000000    
   0.00000000    
   0.00000000    
   0.00000000    
   0.00000000    
   0.00000000    
   0.00000000    
   0.00000000    
   0.00000000    
   0.00000000    
   0.00000000    
   0.00000000    
   0.00000000    
   0.00000000    
   0.00000000    
   0.00000000    
   0.00000000    
   0.00000000    
   0.00000000    
   0.00000000    
   0.00000000    
   0.00000000    
   0.00000000    
   0.00000000    
   0.00000000    
   0.00000000    
   0.00000000    
   0.00000000    
   0.00000000    
   0.00000000    
   0.00000000    
   0.00000000    
   0.00000000    
   0.00000000    
   0.00000000    
   0.00000000    
   0.00000000    
   0.00000000    
   0.00000000    
   0.00000000    
   0.00000000    
   0.00000000    
   0.00000000    
   0.00000000    
   0.00000000    
   0.00000000    
   0.00000000    
   0.00000000    
   0.00000000    
   0.00000000    
   0.00000000    
   0.00000000    
   0.00000000    
   0.00000000    
   0.00000000    
   0.00000000    
   0.00000000    
   0.00000000    
   0.00000000    
   0.00000000    
   0.00000000    
   0.00000000    
   0.00000000    
   0.00000000    
   0.00000000    
   0.00000000    
   0.00000000    
   0.00000000    
   0.00000000    
   0.00000000    
   0.00000000    
   0.00000000    
   0.00000000    
   0.00000000    
   0.00000000    
   0.00000000    
   0.00000000    
   0.00000000    
   0.00000000    
   0.00000000    
   0.00000000    
   0.00000000    
   0.00000000    
   0.00000000    
   0.00000000    
   0.00000000    
   0.00000000    
   0.00000000    
   0.00000000    
   0.00000000    
   0.00000000    
   0.00000000    
   0.00000000    
   0.00000000    
   0.00000000    
   0.00000000    
   0.00000000    
   0.00000000    
   0.00000000    
   0.00000000    
   0.00000000    
   0.00000000    
   0.00000000    
   0.00000000    
   0.00000000    
   0.00000000    
   0.00000000    
   0.00000000    
   0.00000000    
   0.00000000    
   0.00000000    
   0.00000000    
   0.00000000    
   0.00000000    
   0.00000000    
   0.00000000    
   0.00000000    
   0.00000000    
   0.00000000    
   0.00000000    
   0.00000000    
   0.00000000    
   0.00000000    
   0.00000000    
   0.00000000    
   0.00000000    
   0.00000000    
   0.00000000    
   0.00000000    
   0.00000000    
   0.00000000    
   0.00000000    
   0.00000000    
   0.00000000    
   0.00000000    
   0.00000000    
   0.00000000    
   0.00000000    
   0.00000000    
   0.00000000    
   0.00000000    
   0.00000000    
   0.00000000    
   0.00000000    
   0.00000000    
   0.00000000    
   0.00000000    
   0.00000000    
   0.00000000    
   0.00000000    
   0.00000000    
   0.00000000    
   0.00000000    
   0.00000000    
   0.00000000    
   0.00000000    
   0.00000000    
   0.00000000    
   0.00000000    
   0.00000000    
   0.00000000    
   0.00000000    
   0.00000000    
   0.00000000    
   0.00000000    
   0.00000000    
   0.00000000    
   0.00000000    
   0.00000000    
   0.00000000    
   0.00000000    
   0.00000000    
   0.00000000    
   0.00000000    
   0.00000000    
   0.00000000    
   0.00000000    
   0.00000000    
   0.00000000    
   0.00000000    
   0.00000000    
   0.00000000    
   0.00000000    
   0.00000000    
   0.00000000    
   0.00000000    
   0.00000000    
   0.00000000    
   0.00000000    
   0.00000000    
   0.00000000    
   0.00000000    
   0.00000000    
   0.00000000    
   0.00000000    
   0.00000000    
   0.00000000    
   0.00000000    
   0.00000000    
   0.00000000    
   0.00000000    
   0.00000000    
   0.00000000    
   0.00000000    
   0.00000000    
   0.00000000    
   0.00000000    
   0.00000000    
   0.00000000    
   0.00000000    
   0.00000000    
   0.00000000    
   0.00000000    
   0.00000000    
   0.00000000    
   0.00000000    
   0.00000000    
   0.00000000    
   0.00000000    
   0.00000000    
   0.00000000    
   0.00000000    
   0.00000000    
   0.00000000    
   0.00000000    
   0.00000000    
   0.00000000    
   0.00000000    
   0.00000000    
   0.00000000    
   0.00000000    
   0.00000000    
   0.00000000    
   0.00000000    
   0.00000000    
   0.00000000    
   0.00000000    
   0.00000000    
   0.00000000    
   0.00000000    
   0.00000000    
   0.00000000    
   0.00000000    
   0.00000000    
   0.00000000    
   0.00000000    
   0.00000000    
   0.00000000    
   0.00000000    
   0.00000000    
   0.00000000    
   0.00000000    
   0.00000000    
   0.00000000    
   0.00000000    
   0.00000000    
   0.00000000    
   0.00000000    
   0.00000000    
   0.00000000    
   0.00000000    
   0.00000000    
   0.00000000    
   0.00000000    
   0.00000000    
   0.00000000    
   0.00000000    
   0.00000000    
   0.00000000    
   0.00000000    
   0.00000000    
   0.00000000    
   0.00000000    
   0.00000000    
   0.00000000    
   0.00000000    
   0.00000000    
   0.00000000    
   0.00000000    
   0.00000000    
   0.00000000    
   0.00000000    
   0.00000000    
   0.00000000    
   0.00000000    
   0.00000000    
   0.00000000    
   0.00000000    
   0.00000000    
   0.00000000    
   0.00000000    
   0.00000000    
   0.00000000    
   0.00000000    
   0.00000000    
   0.00000000    
   0.00000000    
   0.00000000    
   0.00000000    
   0.00000000    
   0.00000000    
   0.00000000    
   0.00000000    
   0.00000000    
   0.00000000    
   0.00000000    
   0.00000000    
   0.00000000    
   0.00000000    
   0.00000000    
   0.00000000    
   0.00000000    
   0.00000000    
   0.00000000    
   0.00000000    
   0.00000000    
   0.00000000    
   0.00000000    
   0.00000000    
   0.00000000    
   0.00000000    
   0.00000000    
   0.00000000    
   0.00000000    
   0.00000000    
   0.00000000    
   0.00000000    
   0.00000000    
   0.00000000    
   0.00000000    
   0.00000000    
   0.00000000    
   0.00000000    
   0.00000000    
   0.00000000    
   0.00000000    
   0.00000000    
   0.00000000    
   0.00000000    
   0.00000000    
   0.00000000    
   0.00000000    
   0.00000000    
   0.00000000    
   0.00000000    
   0.00000000    
   0.00000000    
   0.00000000    
   0.00000000    
   0.00000000    
   0.00000000    
   0.00000000    
   0.00000000    
   0.00000000    
   0.00000000    
   0.00000000    
   0.00000000    
   0.00000000    
   0.00000000    
   0.00000000    
   0.00000000    
   0.00000000    
   0.00000000    
   0.00000000    
   0.00000000    
   0.00000000    
   0.00000000    
   0.00000000    
   0.00000000    
   0.00000000    
   0.00000000    
   0.00000000    
   0.00000000    
   0.00000000    
   0.00000000    
   0.00000000    
   0.00000000    
   0.00000000    
   0.00000000    
   0.00000000    
   0.00000000    
   0.00000000    
   0.00000000    
   0.00000000    
   0.00000000    
   0.00000000    
   0.00000000    
   0.00000000    
   0.00000000    
   0.00000000    
   0.00000000    
   0.00000000    
   0.00000000    
   0.00000000    
   0.00000000    
   0.00000000    
   0.00000000    
   0.00000000    
   0.00000000    
   0.00000000    
   0.00000000    
   0.00000000    
   0.00000000    
   0.00000000    
   0.00000000    
   0.00000000    
   0.00000000    
   0.00000000    
   0.00000000    
   0.00000000    
   0.00000000    
   0.00000000    
   0.00000000    
   0.00000000    
   0.00000000    
   0.00000000    
   0.00000000    
   0.00000000    
   0.00000000    
   0.00000000    
   0.00000000    
   0.00000000    
   0.00000000    
   0.00000000    
   0.00000000    
   0.00000000    
   0.00000000    
   0.00000000    
   0.00000000    
   0.00000000    
   0.00000000    
   0.00000000    
   0.00000000    
   0.00000000    
   0.00000000    
   0.00000000    
   0.00000000    
   0.00000000    
   0.00000000    
   0.00000000    
   0.00000000    
   0.00000000    
   0.00000000    
   0.00000000    
   0.00000000    
   0.00000000    
   0.00000000    
   0.00000000    
   0.00000000    
   0.00000000    
   0.00000000    
   0.00000000    
   0.00000000    
   0.00000000    
   0.00000000    
   0.00000000    
   0.00000000    
   0.00000000    
   0.00000000    
   0.00000000    
   0.00000000    
   0.00000000    
   0.00000000    
   0.00000000    
   0.00000000    
   0.00000000    
   0.00000000    
   0.00000000    
   0.00000000    
   0.00000000    
   0.00000000    
   0.00000000    
   0.00000000    
   0.00000000    
   0.00000000    
   0.00000000    
   0.00000000    
   0.00000000    
   0.00000000    
   0.00000000    
   0.00000000    
   0.00000000    
   0.00000000    
   0.00000000    
   0.00000000    
   0.00000000    
   0.00000000    
   0.00000000    
   0.00000000    
   0.00000000    
   0.00000000    
   0.00000000    
   0.00000000    
   0.00000000    
   0.00000000    
   0.00000000    
   0.00000000    
   0.00000000    
   0.00000000    
   0.00000000    
   0.00000000    
   0.00000000    
   0.00000000    
   0.00000000    
   0.00000000    
   0.00000000    
   0.00000000    
   0.00000000    
   0.00000000    
   0.00000000    
   0.00000000    
   0.00000000    
   0.00000000    
   0.00000000    
   0.00000000    
   0.00000000    
   0.00000000    
   0.00000000    
   0.00000000    
   0.00000000    
   0.00000000    
   0.00000000    
   0.00000000    
   0.00000000    
   0.00000000    
   0.00000000    
   0.00000000    
   0.00000000    
   0.00000000    
   0.00000000    
   0.00000000    
   0.00000000    
   0.00000000    
   0.00000000    
   0.00000000    
   0.00000000    
   0.00000000    
   0.00000000    
   0.00000000    
   0.00000000    
   0.00000000    
   0.00000000    
   0.00000000    
   0.00000000    
   0.00000000    
   0.00000000    
   0.00000000    
   0.00000000    
   0.00000000    
   0.00000000    
   0.00000000    
   0.00000000    
   0.00000000    
   0.00000000    
   0.00000000    
   0.00000000    
   0.00000000    
   0.00000000    
   0.00000000    
   0.00000000    
   0.00000000    
   0.00000000    
   0.00000000    
   0.00000000    
   0.00000000    
   0.00000000    
   0.00000000    
   0.00000000    
   0.00000000    
   0.00000000    
   0.00000000    
   0.00000000    
   0.00000000    
   0.00000000    
   0.00000000    
   0.00000000    
   0.00000000    
   0.00000000    
   0.00000000    
   0.00000000    
   0.00000000    
   0.00000000    
   0.00000000    
   0.00000000    
   0.00000000    
   0.00000000    
   0.00000000    
   0.00000000    
   0.00000000    
   0.00000000    
   0.00000000    
   0.00000000    
   0.00000000    
   0.00000000    
   0.00000000    
   0.00000000    
   0.00000000    
   0.00000000    
   0.00000000    
   0.00000000    
   0.00000000    
   0.00000000    
   0.00000000    
   0.00000000    
   0.00000000    
   0.00000000    
   0.00000000    
   0.00000000    
   0.00000000    
   0.00000000    
   0.00000000    
   0.00000000    
   0.00000000    
   0.00000000    
   0.00000000    
   0.00000000    
   0.00000000    
   0.00000000    
   0.00000000    
   0.00000000    
   0.00000000    
   0.00000000    
   0.00000000    
   0.00000000    
   0.00000000    
   0.00000000    
   0.00000000    
   0.00000000    
   0.00000000    
   0.00000000    
   0.00000000    
   0.00000000    
   0.00000000    
   0.00000000    
   0.00000000    
   0.00000000    
   0.00000000    
   0.00000000    
   0.00000000    
   0.00000000    
   0.00000000    
   0.00000000    
   0.00000000    
   0.00000000    
   0.00000000    
   0.00000000    
   0.00000000    
   0.00000000    
   0.00000000    
   0.00000000    
   0.00000000    
   0.00000000    
   0.00000000    
   0.00000000    
   0.00000000    
   0.00000000    
   0.00000000    
   0.00000000    
   0.00000000    
   0.00000000    
   0.00000000    
   0.00000000    
   0.00000000    
   0.00000000    
   0.00000000    
   0.00000000    
   0.00000000    
   0.00000000    
   0.00000000    
   0.00000000    
   0.00000000    
   0.00000000    
   0.00000000    
   0.00000000    
   0.00000000    
   0.00000000    
   0.00000000    
   0.00000000    
   0.00000000    
   0.00000000    
   0.00000000    
   0.00000000    
   0.00000000    
   0.00000000    
   0.00000000    
   0.00000000    
   0.00000000    
   0.00000000    
   0.00000000    
   0.00000000    
   0.00000000    
   0.00000000    
   0.00000000    
   0.00000000    
   0.00000000    
   0.00000000    
   0.00000000    
   0.00000000    
   0.00000000    
   0.00000000    
   0.00000000    
   0.00000000    
   0.00000000    
   0.00000000    
   0.00000000    
   0.00000000    
   0.00000000    
   0.00000000    
   0.00000000    
   0.00000000    
   0.00000000    
   0.00000000    
   0.00000000    
   0.00000000    
   0.00000000    
   0.00000000    
   0.00000000    
   0.00000000    
   0.00000000    
   0.00000000    
   0.00000000    
   0.00000000    
   0.00000000    
   0.00000000    
   0.00000000    
   0.00000000    
   0.00000000    
   0.00000000    
   0.00000000    
   0.00000000    
   0.00000000    
   0.00000000    
   0.00000000    
   0.00000000    
   0.00000000    
   0.00000000    
   0.00000000    
   0.00000000    
   0.00000000    
   0.00000000    
   0.00000000    
   0.00000000    
   0.00000000    
   0.00000000    
   0.00000000    
   0.00000000    
   0.00000000    
   0.00000000    
   0.00000000    
   0.00000000    
   0.00000000    
   0.00000000    
   0.00000000    
   0.00000000    
   0.00000000    
   0.00000000    
   0.00000000    
   0.00000000    
   0.00000000    
   0.00000000    
   0.00000000    
   0.00000000    
   0.00000000    
   0.00000000    
   0.00000000    
   0.00000000    
   0.00000000    
   0.00000000    
   0.00000000    
   0.00000000    
   0.00000000    
   0.00000000    
   0.00000000    
   0.00000000    
   0.00000000    
   0.00000000    
   0.00000000    
   0.00000000    
   0.00000000    
   0.00000000    
   0.00000000    
   0.00000000    
   0.00000000    
   0.00000000    
   0.00000000    
   0.00000000    
   0.00000000    
   0.00000000    
   0.00000000    
   0.00000000    
   0.00000000    
   0.00000000    
   0.00000000    
   0.00000000    
   0.00000000    
   0.00000000    
   0.00000000    
   0.00000000    
   0.00000000    
   0.00000000    
   0.00000000    
   0.00000000    
   0.00000000    
   0.00000000    
   0.00000000    
   0.00000000    
   0.00000000    
   0.00000000    
   0.00000000    
   0.00000000    
   0.00000000    
   0.00000000    
   0.00000000    
   0.00000000    
   0.00000000    
   0.00000000    
   0.00000000    
   0.00000000    
   0.00000000    
   0.00000000    
   0.00000000    
   0.00000000    
   0.00000000    
   0.00000000    
   0.00000000    
   0.00000000    
   0.00000000    
   0.00000000    
   0.00000000    
   0.00000000    
   0.00000000    
   0.00000000    
   0.00000000    
   0.00000000    
   0.00000000    
   0.00000000    
   0.00000000    
   0.00000000    
   0.00000000    
   0.00000000    
   0.00000000    
   0.00000000    
   0.00000000    
   0.00000000    
   0.00000000    
   0.00000000    
   0.00000000    
   0.00000000    
   0.00000000    
   0.00000000    
   0.00000000    
   0.00000000    
   0.00000000    
   0.00000000    
   0.00000000    
   0.00000000    
   0.00000000    
   0.00000000    
   0.00000000    
   0.00000000    
   0.00000000    
   0.00000000    
   0.00000000    
   0.00000000    
   0.00000000    
   0.00000000    
   0.00000000    
   0.00000000    
   0.00000000    
   0.00000000    
   0.00000000    
   0.00000000    
   0.00000000    
   0.00000000    
   0.00000000    
   0.00000000    
   0.00000000    
   0.00000000    
   0.00000000    
   0.00000000    
   0.00000000    
   0.00000000    
   0.00000000    
   0.00000000    
   0.00000000    
   0.00000000    
   0.00000000    
   0.00000000    
   0.00000000    
   0.00000000    
   0.00000000    
   0.00000000    
   0.00000000    
   0.00000000    
   0.00000000    
   0.00000000    
   0.00000000    
   0.00000000    
   0.00000000    
   0.00000000    
   0.00000000    
   0.00000000    
   0.00000000    
   0.00000000    
   0.00000000    
   0.00000000    
   0.00000000    
   0.00000000    
   0.00000000    
   0.00000000    
   0.00000000    
   0.00000000    
   0.00000000    
   0.00000000    
   0.00000000    
   0.00000000    
   0.00000000    
   0.00000000    
   0.00000000    
   0.00000000    
   0.00000000    
   0.00000000    
   0.00000000    
   0.00000000    
   0.00000000    
   0.00000000    
   0.00000000    
   0.00000000    
   0.00000000    
   0.00000000    
   0.00000000    
   0.00000000    
   0.00000000    
   0.00000000    
   0.00000000    
   0.00000000    
   0.00000000    
   0.00000000    
   0.00000000    
   0.00000000    
   0.00000000    
   0.00000000    
   0.00000000    
   0.00000000    
   0.00000000    
   0.00000000    
   0.00000000    
   0.00000000    
   0.00000000    
   0.00000000    
   0.00000000    
   0.00000000    
   0.00000000    
   0.00000000    
   0.00000000    
   0.00000000    
   0.00000000    
   0.00000000    
   0.00000000    
   0.00000000    
   0.00000000    
   0.00000000    
   0.00000000    
   0.00000000    
   0.00000000    
   0.00000000    
   0.00000000    
   0.00000000    
   0.00000000    
   0.00000000    
   0.00000000    
   0.00000000    
   0.00000000    
   0.00000000    
   0.00000000    
   0.00000000    
   0.00000000    
   0.00000000    
   0.00000000    
   0.00000000    
   0.00000000    
   0.00000000    
   0.00000000    
   0.00000000    
   0.00000000    
   0.00000000    
   0.00000000    
   0.00000000    
   0.00000000    
   0.00000000    
   0.00000000    
   0.00000000    
   0.00000000    
   0.00000000    
   0.00000000    
   0.00000000    
   0.00000000    
   0.00000000    
   0.00000000    
   0.00000000    
   0.00000000    
   0.00000000    
   0.00000000    
   0.00000000    
   0.00000000    
   0.00000000    
   0.00000000    
   0.00000000    
   0.00000000    
   0.00000000    
   0.00000000    
   0.00000000    
   0.00000000    
   0.00000000    
   0.00000000    
   0.00000000    
   0.00000000    
   0.00000000    
   0.00000000    
   0.00000000    
   0.00000000    
   0.00000000    
   0.00000000    
   0.00000000    
   0.00000000    
   0.00000000    
   0.00000000    
   0.00000000    
   0.00000000    
   0.00000000    
   0.00000000    
   0.00000000    
   0.00000000    
   0.00000000    
   0.00000000    
   0.00000000    
   0.00000000    
   0.00000000    
   0.00000000    
   0.00000000    
   0.00000000    
   0.00000000    
   0.00000000    
   0.00000000    
   0.00000000    
   0.00000000    
   0.00000000    
   0.00000000    
   0.00000000    
   0.00000000    
   0.00000000    
   0.00000000    
   0.00000000    
   0.00000000    
   0.00000000    
   0.00000000    
   0.00000000    
   0.00000000    
   0.00000000    
   0.00000000    
   0.00000000    
   0.00000000    
   0.00000000    
   0.00000000    
   0.00000000    
   0.00000000    
   0.00000000    
   0.00000000    
   0.00000000    
   0.00000000    
   0.00000000    
   0.00000000    
   0.00000000    
   0.00000000    
   0.00000000    
   0.00000000    
   0.00000000    
   0.00000000    
   0.00000000    
   0.00000000    
   0.00000000    
   0.00000000    
   0.00000000    
   0.00000000    
   0.00000000    
   0.00000000    
   0.00000000    
   0.00000000    
   0.00000000    
   0.00000000    
   0.00000000    
   0.00000000    
   0.00000000    
   0.00000000    
   0.00000000    
   0.00000000    
   0.00000000    
   0.00000000    
   0.00000000    
   0.00000000    
   0.00000000    
   0.00000000    
   0.00000000    
   0.00000000    
   0.00000000    
   0.00000000    
   0.00000000    
   0.00000000    
   0.00000000    
   0.00000000    
   0.00000000    
   0.00000000    
   0.00000000    
   0.00000000    
   0.00000000    
   0.00000000    
   0.00000000    
   0.00000000    
   0.00000000    
   0.00000000    
   0.00000000    
   0.00000000    
   0.00000000    
   0.00000000    
   0.00000000    
   0.00000000    
   0.00000000    
   0.00000000    
   0.00000000    
   0.00000000    
   0.00000000    
   0.00000000    
   0.00000000    
   0.00000000    
   0.00000000    
   0.00000000    
   0.00000000    
   0.00000000    
   0.00000000    
   0.00000000    
   0.00000000    
   0.00000000    
   0.00000000    
   0.00000000    
   0.00000000    
   0.00000000    
   0.00000000    
   0.00000000    
   0.00000000    
   0.00000000    
   0.00000000    
   0.00000000    
   0.00000000    
   0.00000000    
   0.00000000    
   0.00000000    
   0.00000000    
   0.00000000    
   0.00000000    
   0.00000000    
   0.00000000    
   0.00000000    
   0.00000000    
   0.00000000    
   0.00000000    
   0.00000000    
   0.00000000    
   0.00000000    
   0.00000000    
   0.00000000    
   0.00000000    
   0.00000000    
   0.00000000    
   0.00000000    
   0.00000000    
   0.00000000    
   0.00000000    
   0.00000000    
   0.00000000    
   0.00000000    
   0.00000000    
   0.00000000    
   0.00000000    
   0.00000000    
   0.00000000    
   0.00000000    
   0.00000000    
   0.00000000    
   0.00000000    
   0.00000000    
   0.00000000    
   0.00000000    
   0.00000000    
   0.00000000    
   0.00000000    
   0.00000000    
   0.00000000    
   0.00000000    
   0.00000000    
   0.00000000    
   0.00000000    
   0.00000000    
   0.00000000    
   0.00000000    
   0.00000000    
   0.00000000    
   0.00000000    
   0.00000000    
   0.00000000    
   0.00000000    
   0.00000000    
   0.00000000    
   0.00000000    
   0.00000000    
   0.00000000    
   0.00000000    
   0.00000000    
   0.00000000    
   0.00000000    
   0.00000000    
   0.00000000    
   0.00000000    
   0.00000000    
   0.00000000    
   0.00000000    
   0.00000000    
   0.00000000    
   0.00000000    
   0.00000000    
   0.00000000    
   0.00000000    
   0.00000000    
   0.00000000    
   0.00000000    
   0.00000000    
   0.00000000    
   0.00000000    
   0.00000000    
   0.00000000    
   0.00000000    
   0.00000000    
   0.00000000    
   0.00000000    
   0.00000000    
   0.00000000    
   0.00000000    
   0.00000000    
   0.00000000    
   0.00000000    
   0.00000000    
   0.00000000    
   0.00000000    
   0.00000000    
   0.00000000    
   0.00000000    
   0.00000000    
   0.00000000    
   0.00000000    
   0.00000000    
   0.00000000    
   0.00000000    
   0.00000000    
   0.00000000    
   0.00000000    
   0.00000000    
   0.00000000    
   0.00000000    
   0.00000000    
   0.00000000    
   0.00000000    
   0.00000000    
   0.00000000    
   0.00000000    
   0.00000000    
   0.00000000    
   0.00000000    
   0.00000000    
   0.00000000    
   0.00000000    
   0.00000000    
   0.00000000    
   0.00000000    
   0.00000000    
   0.00000000    
   0.00000000    
   0.00000000    
   0.00000000    
   0.00000000    
   0.00000000    
   0.00000000    
   0.00000000    
   0.00000000    
   0.00000000    
   0.00000000    
   0.00000000    
   0.00000000    
   0.00000000    
   0.00000000    
   0.00000000    
   0.00000000    
   0.00000000    
   0.00000000    
   0.00000000    
   0.00000000    
   0.00000000    
   0.00000000    
   0.00000000    
   0.00000000    
   0.00000000    
   0.00000000    
   0.00000000    
   0.00000000    
   0.00000000    
   0.00000000    
   0.00000000    
   0.00000000    
   0.00000000    
   0.00000000    
   0.00000000    
   0.00000000    
   0.00000000    
   0.00000000    
   0.00000000    
   0.00000000    
   0.00000000    
   0.00000000    
   0.00000000    
   0.00000000    
   0.00000000    
   0.00000000    
   0.00000000    
   0.00000000    
   0.00000000    
   0.00000000    
   0.00000000    
   0.00000000    
   0.00000000    
   0.00000000    
   0.00000000    
   0.00000000    
   0.00000000    
   0.00000000    
   0.00000000    
   0.00000000    
   0.00000000    
   0.00000000    
   0.00000000    
   0.00000000    
   0.00000000    
   0.00000000    
   0.00000000    
   0.00000000    
   0.00000000    
   0.00000000    
   0.00000000    
   0.00000000    
   0.00000000    
   0.00000000    
   0.00000000    
   0.00000000    
   0.00000000    
   0.00000000    
   0.00000000    
   0.00000000    
   0.00000000    
   0.00000000    
   0.00000000    
   0.00000000    
   0.00000000    
   0.00000000    
   0.00000000    
   0.00000000    
   0.00000000    
   0.00000000    
   0.00000000    
   0.00000000    
   0.00000000    
   0.00000000    
   0.00000000    
   0.00000000    
   0.00000000    
   0.00000000    
   0.00000000    
   0.00000000    
   0.00000000    
   0.00000000    
   0.00000000    
   0.00000000    
   0.00000000    
   0.00000000    
   0.00000000    
   0.00000000    
   0.00000000    
   0.00000000    
   0.00000000    
   0.00000000    
   0.00000000    
   0.00000000    
   0.00000000    
   0.00000000    
   0.00000000    
   0.00000000    
   0.00000000    
   0.00000000    
   0.00000000    
   0.00000000    
   0.00000000    
   0.00000000    
   0.00000000    
   0.00000000    
   0.00000000    
   0.00000000    
   0.00000000    
   0.00000000    
   0.00000000    
   0.00000000    
   0.00000000    
   0.00000000    
   0.00000000    
   0.00000000    
   0.00000000    
   0.00000000    
   0.00000000    
   0.00000000    
   0.00000000    
   0.00000000    
   0.00000000    
   0.00000000    
   0.00000000    
   0.00000000    
   0.00000000    
   0.00000000    
   0.00000000    
   0.00000000    
   0.00000000    
   0.00000000    
   0.00000000    
   0.00000000    
   0.00000000    
   0.00000000    
   0.00000000    
   0.00000000    
   0.00000000    
   0.00000000    
   0.00000000    
   0.00000000    
   0.00000000    
   0.00000000    
   0.00000000    
   0.00000000    
   0.00000000    
   0.00000000    
   0.00000000    
   0.00000000    
   0.00000000    
   0.00000000    
   0.00000000    
   0.00000000    
   0.00000000    
   0.00000000    
   0.00000000    
   0.00000000    
   0.00000000    
   0.00000000    
   0.00000000    
   0.00000000    
   0.00000000    
   0.00000000    
   0.00000000    
   0.00000000    
   0.00000000    
   0.00000000    
   0.00000000    
   0.00000000    
   0.00000000    
   0.00000000    
   0.00000000    
   0.00000000    
   0.00000000    
   0.00000000    
   0.00000000    
   0.00000000    
   0.00000000    
   0.00000000    
   0.00000000    
   0.00000000    
   0.00000000    
   0.00000000    
   0.00000000    
   0.00000000    
   0.00000000    
   0.00000000    
   0.00000000    
   0.00000000    
   0.00000000    
   0.00000000    
   0.00000000    
   0.00000000    
   0.00000000    
   0.00000000    
   0.00000000    
   0.00000000    
   0.00000000    
   0.00000000    
   0.00000000    
   0.00000000    
   0.00000000    
   0.00000000    
   0.00000000    
   0.00000000    
   0.00000000    
   0.00000000    
   0.00000000    
   0.00000000    
   0.00000000    
   0.00000000    
   0.00000000    
   0.00000000    
   0.00000000    
   0.00000000    
   0.00000000    
   0.00000000    
   0.00000000    
   0.00000000    
   0.00000000    
   0.00000000    
   0.00000000    
   0.00000000    
   0.00000000    
   0.00000000    
   0.00000000    
   0.00000000    
   0.00000000    
   0.00000000    
   0.00000000    
   0.00000000    
   0.00000000    
   0.00000000    
   0.00000000    
   0.00000000    
   0.00000000    
   0.00000000    
   0.00000000    
   0.00000000    
   0.00000000    
   0.00000000    
   0.00000000    
   0.00000000    
   0.00000000    
   0.00000000    
   0.00000000    
   0.00000000    
   0.00000000    
   0.00000000    
   0.00000000    
   0.00000000    
   0.00000000    
   0.00000000    
   0.00000000    
   0.00000000    
   0.00000000    
   0.00000000    
   0.00000000    
   0.00000000    
   0.00000000    
   0.00000000    
   0.00000000    
   0.00000000    
   0.00000000    
   0.00000000    
   0.00000000    
   0.00000000    
   0.00000000    
   0.00000000    
   0.00000000    
   0.00000000    
   0.00000000    
   0.00000000    
   0.00000000    
   0.00000000    
   0.00000000    
   0.00000000    
   0.00000000    
   0.00000000    
   0.00000000    
   0.00000000    
   0.00000000    
   0.00000000    
   0.00000000    
   0.00000000    
   0.00000000    
   0.00000000    
   0.00000000    
   0.00000000    
   0.00000000    
   0.00000000    
   0.00000000    
   0.00000000    
   0.00000000    
   0.00000000    
   0.00000000    
   0.00000000    
   0.00000000    
   0.00000000    
   0.00000000    
   0.00000000    
   0.00000000    
   0.00000000    
   0.00000000    
   0.00000000    
   0.00000000    
   0.00000000    
   0.00000000    
   0.00000000    
   0.00000000    
   0.00000000    
   0.00000000    
   0.00000000    
   0.00000000    
   0.00000000    
   0.00000000    
   0.00000000    
   0.00000000    
   0.00000000    
   0.00000000    
   0.00000000    
   0.00000000    
   0.00000000    
   0.00000000    
   0.00000000    
   0.00000000    
   0.00000000    
   0.00000000    
   0.00000000    
   0.00000000    
   0.00000000    
   0.00000000    
   0.00000000    
   0.00000000    
   0.00000000    
   0.00000000    
   0.00000000    
   0.00000000    
   0.00000000    
   0.00000000    
   0.00000000    
   0.00000000    
   0.00000000    
   0.00000000    
   0.00000000    
   0.00000000    
   0.00000000    
   0.00000000    
   0.00000000    
   0.00000000    
   0.00000000    
   0.00000000    
   0.00000000    
   0.00000000    
   0.00000000    
   0.00000000    
   0.00000000    
   0.00000000    
   0.00000000    
   0.00000000    
   0.00000000    
   0.00000000    
   0.00000000    
   0.00000000    
   0.00000000    
   0.00000000    
   0.00000000    
   0.00000000    
   0.00000000    
   0.00000000    
   0.00000000    
   0.00000000    
   0.00000000    
   0.00000000    
   0.00000000    
   0.00000000    
   0.00000000    
   0.00000000    
   0.00000000    
   0.00000000    
   0.00000000    
   0.00000000    
   0.00000000    
   0.00000000    
   0.00000000    
   0.00000000    
   0.00000000    
   0.00000000    
   0.00000000    
   0.00000000    
   0.00000000    
   0.00000000    
   0.00000000    
   0.00000000    
   0.00000000    
   0.00000000    
   0.00000000    
   0.00000000    
   0.00000000    
   0.00000000    
   0.00000000    
   0.00000000    
   0.00000000    
   0.00000000    
   0.00000000    
   0.00000000    
   0.00000000    
   0.00000000    
   0.00000000    
   0.00000000    
   0.00000000    
   0.00000000    
   0.00000000    
   0.00000000    
   0.00000000    
   0.00000000    
   0.00000000    
   0.00000000    
   0.00000000    
   0.00000000    
   0.00000000    
   0.00000000    
   0.00000000    
   0.00000000    
   0.00000000    
   0.00000000    
   0.00000000    
   0.00000000    
   0.00000000    
   0.00000000    
   0.00000000    
   0.00000000    
   0.00000000    
   0.00000000    
   0.00000000    
   0.00000000    
   0.00000000    
   0.00000000    
   0.00000000    
   0.00000000    
   0.00000000    
   0.00000000    
   0.00000000    
   0.00000000    
   0.00000000    
   0.00000000    
   0.00000000    
   0.00000000    
   0.00000000    
   0.00000000    
   0.00000000    
   0.00000000    
   0.00000000    
   0.00000000    
   0.00000000    
   0.00000000    
   0.00000000    
   0.00000000    
   0.00000000    
   0.00000000    
   0.00000000    
   0.00000000    
   0.00000000    
   0.00000000    
   0.00000000    
   0.00000000    
   0.00000000    
   0.00000000    
   0.00000000    
   0.00000000    
   0.00000000    
   0.00000000    
   0.00000000    
   0.00000000    
   0.00000000    
   0.00000000    
   0.00000000    
   0.00000000    
   0.00000000    
   0.00000000    
   0.00000000    
   0.00000000    
   0.00000000    
   0.00000000    
   0.00000000    
   0.00000000    
   0.00000000    
   0.00000000    
   0.00000000    
   0.00000000    
   0.00000000    
   0.00000000    
   0.00000000    
   0.00000000    
   0.00000000    
   0.00000000    
   0.00000000    
   0.00000000    
   0.00000000    
   0.00000000    
   0.00000000    
   0.00000000    
   0.00000000    
   0.00000000    
   0.00000000    
   0.00000000    
   0.00000000    
   0.00000000    
   0.00000000    
   0.00000000    
   0.00000000    
   0.00000000    
   0.00000000    
   0.00000000    
   0.00000000    
   0.00000000    
   0.00000000    
   0.00000000    
   0.00000000    
   0.00000000    
   0.00000000    
   0.00000000    
   0.00000000    
   0.00000000    
   0.00000000    
   0.00000000    
   0.00000000    
   0.00000000    
   0.00000000    
   0.00000000    
   0.00000000    
   0.00000000    
   0.00000000    
   0.00000000    
   0.00000000    
   0.00000000    
   0.00000000    
   0.00000000    
   0.00000000    
   0.00000000    
   0.00000000    
   0.00000000    
   0.00000000    
   0.00000000    
   0.00000000    
   0.00000000    
   0.00000000    
   0.00000000    
   0.00000000    
   0.00000000    
   0.00000000    
   0.00000000    
   0.00000000    
   0.00000000    
   0.00000000    
   0.00000000    
   0.00000000    
   0.00000000    
   0.00000000    
   0.00000000    
   0.00000000    
   0.00000000    
   0.00000000    
   0.00000000    
   0.00000000    
   0.00000000    
   0.00000000    
   0.00000000    
   0.00000000    
   0.00000000    
   0.00000000    
   0.00000000    
   0.00000000    
   0.00000000    
   0.00000000    
   0.00000000    
   0.00000000    
   0.00000000    
   0.00000000    
   0.00000000    
   0.00000000    
   0.00000000    
   0.00000000    
   0.00000000    
   0.00000000    
   0.00000000    
   0.00000000    
   0.00000000    
   0.00000000    
   0.00000000    
   0.00000000    
   0.00000000    
   0.00000000    
   0.00000000    
   0.00000000    
   0.00000000    
   0.00000000    
   0.00000000    
   0.00000000    
   0.00000000    
   0.00000000    
   0.00000000    
   0.00000000    
   0.00000000    
   0.00000000    
   0.00000000    
   0.00000000    
   0.00000000    
   0.00000000    
   0.00000000    
   0.00000000    
   0.00000000    
   0.00000000    
   0.00000000    
   0.00000000    
   0.00000000    
   0.00000000    
   0.00000000    
   0.00000000    
   0.00000000    
   0.00000000    
   0.00000000    
   0.00000000    
   0.00000000    
   0.00000000    
   0.00000000    
   0.00000000    
   0.00000000    
   0.00000000    
   0.00000000    
   0.00000000    
   0.00000000    
   0.00000000    
   0.00000000    
   0.00000000    
   0.00000000    
   0.00000000    
   0.00000000    
   0.00000000    
   0.00000000    
   0.00000000    
   0.00000000    
   0.00000000    
   0.00000000    
   0.00000000    
   0.00000000    
   0.00000000    
   0.00000000    
   0.00000000    
   0.00000000    
   0.00000000    
   0.00000000    
   0.00000000    
   0.00000000    
   0.00000000    
   0.00000000    
   0.00000000    
   0.00000000    
   0.00000000    
   0.00000000    
   0.00000000    
   0.00000000    
   0.00000000    
   0.00000000    
   0.00000000    
   0.00000000    
   0.00000000    
   0.00000000    
   0.00000000    
   0.00000000    
   0.00000000    
   0.00000000    
   0.00000000    
   0.00000000    
   0.00000000    
   0.00000000    
   0.00000000    
   0.00000000    
   0.00000000    
   0.00000000    
   0.00000000    
   0.00000000    
   0.00000000    
   0.00000000    
   0.00000000    
   0.00000000    
   0.00000000    
   0.00000000    
   0.00000000    
   0.00000000    
   0.00000000    
   0.00000000    
   0.00000000    
   0.00000000    
   0.00000000    
   0.00000000    
   0.00000000    
   0.00000000    
   0.00000000    
   0.00000000    
   0.00000000    
   0.00000000    
   0.00000000    
   0.00000000    
   0.00000000    
   0.00000000    
   0.00000000    
   0.00000000    
   0.00000000    
   0.00000000    
   0.00000000    
   0.00000000    
   0.00000000    
   0.00000000    
   0.00000000    
   0.00000000    
   0.00000000    
   0.00000000    
   0.00000000    
   0.00000000    
   0.00000000    
   0.00000000    
   0.00000000    
   0.00000000    
   0.00000000    
   0.00000000    
   0.00000000    
   0.00000000    
   0.00000000    
   0.00000000    
   0.00000000    
   0.00000000    
   0.00000000    
   0.00000000    
   0.00000000    
   0.00000000    
   0.00000000    
   0.00000000    
   0.00000000    
   0.00000000    
   0.00000000    
   0.00000000    
   0.00000000    
   0.00000000    
   0.00000000    
   0.00000000    
   0.00000000    
   0.00000000    
   0.00000000    
   0.00000000    
   0.00000000    
   0.00000000    
   0.00000000    
   0.00000000    
   0.00000000    
   0.00000000    
   0.00000000    
   0.00000000    
   0.00000000    
   0.00000000    
   0.00000000    
   0.00000000    
   0.00000000    
   0.00000000    
   0.00000000    
   0.00000000    
   0.00000000    
   0.00000000    
   0.00000000    
   0.00000000    
   0.00000000    
   0.00000000    
   0.00000000    
   0.00000000    
   0.00000000    
   0.00000000    
   0.00000000    
   0.00000000    
   0.00000000    
   0.00000000    
   0.00000000    
   0.00000000    
   0.00000000    
   0.00000000    
   0.00000000    
   0.00000000    
   0.00000000    
   0.00000000    
   0.00000000    
   0.00000000    
   0.00000000    
   0.00000000    
   0.00000000    
   0.00000000    
   0.00000000    
   0.00000000    
   0.00000000    
   0.00000000    
   0.00000000    
   0.00000000    
   0.00000000    
   0.00000000    
   0.00000000    
   0.00000000    
   0.00000000    
   0.00000000    
   0.00000000    
   0.00000000    
   0.00000000    
   0.00000000    
   0.00000000    
   0.00000000    
   0.00000000    
   0.00000000    
   0.00000000    
   0.00000000    
   0.00000000    
   0.00000000    
   0.00000000    
   0.00000000    
   0.00000000    
   0.00000000    
   0.00000000    
   0.00000000    
   0.00000000    
   0.00000000    
   0.00000000    
   0.00000000    
   0.00000000    
   0.00000000    
   0.00000000    
   0.00000000    
   0.00000000    
   0.00000000    
   0.00000000    
   0.00000000    
   0.00000000    
   0.00000000    
   0.00000000    
   0.00000000    
   0.00000000    
   0.00000000    
   0.00000000    
   0.00000000    
   0.00000000    
   0.00000000    
   0.00000000    
   0.00000000    
   0.00000000    
   0.00000000    
   0.00000000    
   0.00000000    
   0.00000000    
   0.00000000    
   0.00000000    
   0.00000000    
   0.00000000    
   0.00000000    
   0.00000000    
   0.00000000    
   0.00000000    
   0.00000000    
   0.00000000    
   0.00000000    
   0.00000000    
   0.00000000    
   0.00000000    
   0.00000000    
   0.00000000    
   0.00000000    
   0.00000000    
   0.00000000    
   0.00000000    
   0.00000000    
   0.00000000    
   0.00000000    
   0.00000000    
   0.00000000    
   0.00000000    
   0.00000000    
   0.00000000    
   0.00000000    
   0.00000000    
   0.00000000    
   0.00000000    
   0.00000000    
   0.00000000    
   0.00000000    
   0.00000000    
   0.00000000    
   0.00000000    
   0.00000000    
   0.00000000    
   0.00000000    
   0.00000000    
   0.00000000    
   0.00000000    
   0.00000000    
   0.00000000    
   0.00000000    
   0.00000000    
   0.00000000    
   0.00000000    
   0.00000000    
   0.00000000    
   0.00000000    
   0.00000000    
   0.00000000    
   0.00000000    
   0.00000000    
   0.00000000    
   0.00000000    
   0.00000000    
   0.00000000    
   0.00000000    
   0.00000000    
   0.00000000    
   0.00000000    
   0.00000000    
   0.00000000    
   0.00000000    
   0.00000000    
   0.00000000    
   0.00000000    
   0.00000000    
   0.00000000    
   0.00000000    
   0.00000000    
   0.00000000    
   0.00000000    
   0.00000000    
   0.00000000    
   0.00000000    
   0.00000000    
   0.00000000    
   0.00000000    
   0.00000000    
   0.00000000    
   0.00000000    
   0.00000000    
   0.00000000    
   0.00000000    
   0.00000000    
   0.00000000    
   0.00000000    
   0.00000000    
   0.00000000    
   0.00000000    
   0.00000000    
   0.00000000    
   0.00000000    
   0.00000000    
   0.00000000    
   0.00000000    
   0.00000000    
   0.00000000    
   0.00000000    
   0.00000000    
   0.00000000    
   0.00000000    
   0.00000000    
   0.00000000    
   0.00000000    
   0.00000000    
   0.00000000    
   0.00000000    
   0.00000000    
   0.00000000    
   0.00000000    
   0.00000000    
   0.00000000    
   0.00000000    
   0.00000000    
   0.00000000    
   0.00000000    
   0.00000000    
   0.00000000    
   0.00000000    
   0.00000000    
   0.00000000    
   0.00000000    
   0.00000000    
   0.00000000    
   0.00000000    
   0.00000000    
   0.00000000    
   0.00000000    
   0.00000000    
   0.00000000    
   0.00000000    
   0.00000000    
   0.00000000    
   0.00000000    
   0.00000000    
   0.00000000    
   0.00000000    
   0.00000000    
   0.00000000    
   0.00000000    
   0.00000000    
   0.00000000    
   0.00000000    
   0.00000000    
   0.00000000    
   0.00000000    
   0.00000000    
   0.00000000    
   0.00000000    
   0.00000000    
   0.00000000    
   0.00000000    
   0.00000000    
   0.00000000    
   0.00000000    
   0.00000000    
   0.00000000    
   0.00000000    
   0.00000000    
   0.00000000    
   0.00000000    
   0.00000000    
   0.00000000    
   0.00000000    
   0.00000000    
   0.00000000    
   0.00000000    
   0.00000000    
   0.00000000    
   0.00000000    
   0.00000000    
   0.00000000    
   0.00000000    
   0.00000000    
   0.00000000    
   0.00000000    
   0.00000000    
   0.00000000    
   0.00000000    
   0.00000000    
   0.00000000    
   0.00000000    
   0.00000000    
   0.00000000    
   0.00000000    
   0.00000000    
   0.00000000    
   0.00000000    
   0.00000000    
   0.00000000    
   0.00000000    
   0.00000000    
   0.00000000    
   0.00000000    
   0.00000000    
   0.00000000    
   0.00000000    
   0.00000000    
   0.00000000    
   0.00000000    
   0.00000000    
   0.00000000    
   0.00000000    
   0.00000000    
   0.00000000    
   0.00000000    
   0.00000000    
   0.00000000    
   0.00000000    
   0.00000000    
   0.00000000    
   0.00000000    
   0.00000000    
   0.00000000    
   0.00000000    
   0.00000000    
   0.00000000    
   0.00000000    
   0.00000000    
   0.00000000    
   0.00000000    
   0.00000000    
   0.00000000    
   0.00000000    
   0.00000000    
   0.00000000    
   0.00000000    
   0.00000000    
   0.00000000    
   0.00000000    
   0.00000000    
   0.00000000    
   0.00000000    
   0.00000000    
   0.00000000    
   0.00000000    
   0.00000000    
   0.00000000    
   0.00000000    
   0.00000000    
   0.00000000    
   0.00000000    
   0.00000000    
   0.00000000    
   0.00000000    
   0.00000000    
   0.00000000    
   0.00000000    
   0.00000000    
   0.00000000    
   0.00000000    
   0.00000000    
   0.00000000    
   0.00000000    
   0.00000000    
   0.00000000    
   0.00000000    
   0.00000000    
   0.00000000    
   0.00000000    
   0.00000000    
   0.00000000    
   0.00000000    
   0.00000000    
   0.00000000    
   0.00000000    
   0.00000000    
   0.00000000    
   0.00000000    
   0.00000000    
   0.00000000    
   0.00000000    
   0.00000000    
   0.00000000    
   0.00000000    
   0.00000000    
   0.00000000    
   0.00000000    
   0.00000000    
   0.00000000    
   0.00000000    
   0.00000000    
   0.00000000    
   0.00000000    
   0.00000000    
   0.00000000    
   0.00000000    
   0.00000000    
   0.00000000    
   0.00000000    
   0.00000000    
   0.00000000    
   0.00000000    
   0.00000000    
   0.00000000    
   0.00000000    
   0.00000000    
   0.00000000    
   0.00000000    
   0.00000000    
   0.00000000    
   0.00000000    
   0.00000000    
   0.00000000    
   0.00000000    
   0.00000000    
   0.00000000    
   0.00000000    
   0.00000000    
   0.00000000    
   0.00000000    
   0.00000000    
   0.00000000    
   0.00000000    
   0.00000000    
   0.00000000    
   0.00000000    
   0.00000000    
   0.00000000    
   0.00000000    
   0.00000000    
   0.00000000    
   0.00000000    
   0.00000000    
   0.00000000    
   0.00000000    
   0.00000000    
   0.00000000    
   0.00000000    
   0.00000000    
   0.00000000    
   0.00000000    
   0.00000000    
   0.00000000    
   0.00000000    
   0.00000000    
   0.00000000    
   0.00000000    
   0.00000000    
   0.00000000    
   0.00000000    
   0.00000000    
   0.00000000    
   0.00000000    
   0.00000000    
   0.00000000    
   0.00000000    
   0.00000000    
   0.00000000    
   0.00000000    
   0.00000000    
   0.00000000    
   0.00000000    
   0.00000000    
   0.00000000    
   0.00000000    
   0.00000000    
   0.00000000    
   0.00000000    
   0.00000000    
   0.00000000    
   0.00000000    
   0.00000000    
   0.00000000    
   0.00000000    
   0.00000000    
   0.00000000    
   0.00000000    
   0.00000000    
   0.00000000    
   0.00000000    
   0.00000000    
   0.00000000    
   0.00000000    
   0.00000000    
   0.00000000    
   0.00000000    
   0.00000000    
   0.00000000    
   0.00000000    
   0.00000000    
   0.00000000    
   0.00000000    
   0.00000000    
   0.00000000    
   0.00000000    
   0.00000000    
   0.00000000    
   0.00000000    
   0.00000000    
   0.00000000    
   0.00000000    
   0.00000000    
   0.00000000    
   0.00000000    
   0.00000000    
   0.00000000    
   0.00000000    
   0.00000000    
   0.00000000    
   0.00000000    
   0.00000000    
   0.00000000    
   0.00000000    
   0.00000000    
   0.00000000    
   0.00000000    
   0.00000000    
   0.00000000    
   0.00000000    
   0.00000000    
   0.00000000    
   0.00000000    
   0.00000000    
   0.00000000    
   0.00000000    
   0.00000000    
   0.00000000    
   0.00000000    
   0.00000000    
   0.00000000    
   0.00000000    
   0.00000000    
   0.00000000    
   0.00000000    
   0.00000000    
   0.00000000    
   0.00000000    
   0.00000000    
   0.00000000    
   0.00000000    
   0.00000000    
   0.00000000    
   0.00000000    
   0.00000000    
   0.00000000    
   0.00000000    
   0.00000000    
   0.00000000    
   0.00000000    
   0.00000000    
   0.00000000    
   0.00000000    
   0.00000000    
   0.00000000    
   0.00000000    
   0.00000000    
   0.00000000    
   0.00000000    
   0.00000000    
   0.00000000    
   0.00000000    
   0.00000000    
   0.00000000    
   0.00000000    
   0.00000000    
   0.00000000    
   0.00000000    
   0.00000000    
   0.00000000    
   0.00000000    
   0.00000000    
   0.00000000    
   1.00000000    
   0.00000000    
   0.00000000    
   0.00000000    
   0.00000000    
   0.00000000    
   0.00000000    
   0.00000000    
   0.00000000    
   0.00000000    
   0.00000000    
   0.00000000    
   0.00000000    
   0.00000000    
   0.00000000    
   0.00000000    
   0.00000000    
   0.00000000    
   0.00000000    
   0.00000000    
   0.00000000    
   0.00000000    
   0.00000000    
   0.00000000    
   0.00000000    
   0.00000000    
   0.00000000    
   0.00000000    
   0.00000000    
   0.00000000    
   0.00000000    
   0.00000000    
   0.00000000    
   0.00000000    
   0.00000000    
   0.00000000    
   0.00000000    
   0.00000000    
   0.00000000    
   0.00000000    
   0.00000000    
   0.00000000    
   0.00000000    
   0.00000000    
   0.00000000    
   0.00000000    
   0.00000000    
   0.00000000    
   0.00000000    
   0.00000000    
   0.00000000    
   0.00000000    
   0.00000000    
   0.00000000    
   0.00000000    
   0.00000000    
   0.00000000    
   0.00000000    
   0.00000000    
   0.00000000    
   0.00000000    
   0.00000000    
   0.00000000    
   1.00000000    
   0.00000000    
   0.00000000    
   0.00000000    
   0.00000000    
   0.00000000    
   0.00000000    
   0.00000000    
   0.00000000    
   0.00000000    
   0.00000000    
   0.00000000    
   0.00000000    
   0.00000000    
   0.00000000    
   0.00000000    
   0.00000000    
   0.00000000    
   0.00000000    
   0.00000000    
   0.00000000    
   0.00000000    
   0.00000000    
   0.00000000    
   0.00000000    
   0.00000000    
   0.00000000    
   0.00000000    
   0.00000000    
   0.00000000    
   0.00000000    
   0.00000000    
   0.00000000    
   0.00000000    
   0.00000000    
   0.00000000    
   0.00000000    
   0.00000000    
   0.00000000    
   0.00000000    
   0.00000000    
   0.00000000    
   0.00000000    
   0.00000000    
   0.00000000    
   0.00000000    
   0.00000000    
   0.00000000    
   0.00000000    
   0.00000000    
   0.00000000    
   0.00000000    
   0.00000000    
   0.00000000    
   0.00000000    
   0.00000000    
   0.00000000    
   0.00000000    
   0.00000000    
   0.00000000    
   0.00000000    
   0.00000000    
   0.00000000    
   0.00000000    
   0.00000000    
   0.00000000    
   0.00000000    
   0.00000000    
   0.00000000    
   0.00000000    
   0.00000000    
   0.00000000    
   0.00000000    
   0.00000000    
   0.00000000    
   0.00000000    
   0.00000000    
   0.00000000    
   0.00000000    
   0.00000000    
   0.00000000    
   0.00000000    
   0.00000000    
   0.00000000    
   0.00000000    
   0.00000000    
   0.00000000    
   0.00000000    
   0.00000000    
   0.00000000    
   0.00000000    
   0.00000000    
   0.00000000    
   0.00000000    
   0.00000000    
   0.00000000    
   0.00000000    
   0.00000000    
   0.00000000    
   0.00000000    
   0.00000000    
   0.00000000    
   0.00000000    
   0.00000000    
   0.00000000    
   0.00000000    
   0.00000000    
   0.00000000    
   0.00000000    
   0.00000000    
   0.00000000    
   0.00000000    
   0.00000000    
   0.00000000    
   0.00000000    
   0.00000000    
   0.00000000    
   0.00000000    
   0.00000000    
   0.00000000    
   0.00000000    
   0.00000000    
   0.00000000    
   0.00000000    
   0.00000000    
   0.00000000    
   0.00000000    
   0.00000000    
   0.00000000    
   0.00000000    
   0.00000000    
   0.00000000    
   2.00000000    
   0.00000000    
   0.00000000    
   0.00000000    
   0.00000000    
   0.00000000    
   0.00000000    
   0.00000000    
   0.00000000    
   0.00000000    
   0.00000000    
   0.00000000    
   0.00000000    
   0.00000000    
   0.00000000    
   0.00000000    
   0.00000000    
   0.00000000    
   0.00000000    
   0.00000000    
   0.00000000    
   0.00000000    
   0.00000000    
   0.00000000    
   0.00000000    
   0.00000000    
   0.00000000    
   0.00000000    
   0.00000000    
   0.00000000    
   0.00000000    
   0.00000000    
   0.00000000    
   0.00000000    
   0.00000000    
   0.00000000    
   0.00000000    
   0.00000000    
   0.00000000    
   0.00000000    
   0.00000000    
   0.00000000    
   0.00000000    
   0.00000000    
   0.00000000    
   0.00000000    
   0.00000000    
   0.00000000    
   0.00000000    
   0.00000000    
   0.00000000    
   0.00000000    
   0.00000000    
   0.00000000    
   0.00000000    
   1.00000000    
   0.00000000    
   0.00000000    
   0.00000000    
   0.00000000    
   1.00000000    
   0.00000000    
   0.00000000    
   0.00000000    
   0.00000000    
   0.00000000    
   2.00000000    
   0.00000000    
   0.00000000    
   0.00000000    
   0.00000000    
   0.00000000    
   0.00000000    
   0.00000000    
   0.00000000    
   0.00000000    
   0.00000000    
   0.00000000    
   0.00000000    
   0.00000000    
   0.00000000    
   0.00000000    
   0.00000000    
   0.00000000    
   0.00000000    
   0.00000000    
   0.00000000    
   0.00000000    
   0.00000000    
   0.00000000    
   0.00000000    
   0.00000000    
   0.00000000    
   0.00000000    
   0.00000000    
   0.00000000    
   0.00000000    
   0.00000000    
   0.00000000    
   0.00000000    
   0.00000000    
   0.00000000    
   0.00000000    
   0.00000000    
   0.00000000    
   0.00000000    
   0.00000000    
   0.00000000    
   0.00000000    
   0.00000000    
   0.00000000    
   0.00000000    
   0.00000000    
   0.00000000    
   0.00000000    
   0.00000000    
   0.00000000    
   0.00000000    
   0.00000000    
   1.00000000    
   0.00000000    
   0.00000000    
   0.00000000    
   0.00000000    
   0.00000000    
   0.00000000    
   0.00000000    
   0.00000000    
   0.00000000    
   0.00000000    
   0.00000000    
   0.00000000    
   0.00000000    
   0.00000000    
   0.00000000    
   0.00000000    
   0.00000000    
   0.00000000    
   0.00000000    
   0.00000000    
   0.00000000    
   0.00000000    
   0.00000000    
   0.00000000    
   0.00000000    
   0.00000000    
   0.00000000    
   0.00000000    
   0.00000000    
   0.00000000    
   0.00000000    
   0.00000000    
   0.00000000    
   0.00000000    
   0.00000000    
   0.00000000    
   0.00000000    
   0.00000000    
   0.00000000    
   0.00000000    
   0.00000000    
   0.00000000    
   0.00000000    
   0.00000000    
   0.00000000    
   0.00000000    
   0.00000000    
   0.00000000    
   0.00000000    
   0.00000000    
   0.00000000    
   0.00000000    
   0.00000000    
   0.00000000    
   0.00000000    
   0.00000000    
   0.00000000    
   0.00000000    
   0.00000000    
   0.00000000    
   0.00000000    
   0.00000000    
   0.00000000    
   0.00000000    
   1.00000000    
   0.00000000    
   0.00000000    
   0.00000000    
   0.00000000    
   0.00000000    
   1.00000000    
   0.00000000    
   1.00000000    
   0.00000000    
   0.00000000    
   0.00000000    
   1.00000000    
   0.00000000    
   0.00000000    
   0.00000000    
   0.00000000    
   0.00000000    
   0.00000000    
   0.00000000    
   0.00000000    
   0.00000000    
   0.00000000    
   0.00000000    
   0.00000000    
   0.00000000    
   0.00000000    
   0.00000000    
   0.00000000    
   0.00000000    
   0.00000000    
   0.00000000    
   0.00000000    
   0.00000000    
   0.00000000    
   0.00000000    
   0.00000000    
   0.00000000    
   0.00000000    
   0.00000000    
   0.00000000    
   0.00000000    
   0.00000000    
   0.00000000    
   0.00000000    
   0.00000000    
   0.00000000    
   0.00000000    
   0.00000000    
   0.00000000    
   0.00000000    
   0.00000000    
   0.00000000    
   0.00000000    
   0.00000000    
   0.00000000    
   0.00000000    
   0.00000000    
   0.00000000    
   0.00000000    
   0.00000000    
   0.00000000    
   0.00000000    
   0.00000000    
   0.00000000    
   0.00000000    
   0.00000000    
   1.00000000    
   0.00000000    
   1.00000000    
   0.00000000    
   0.00000000    
   0.00000000    
   0.00000000    
   1.00000000    
   0.00000000    
   0.00000000    
   0.00000000    
   1.00000000    
   0.00000000    
   0.00000000    
   0.00000000    
   0.00000000    
   0.00000000    
   0.00000000    
   0.00000000    
   0.00000000    
   0.00000000    
   0.00000000    
   0.00000000    
   0.00000000    
   0.00000000    
   0.00000000    
   0.00000000    
   0.00000000    
   0.00000000    
   0.00000000    
   0.00000000    
   0.00000000    
   0.00000000    
   0.00000000    
   0.00000000    
   0.00000000    
   0.00000000    
   0.00000000    
   0.00000000    
   0.00000000    
   0.00000000    
   0.00000000    
   0.00000000    
   0.00000000    
   0.00000000    
   0.00000000    
   0.00000000    
   0.00000000    
   0.00000000    
   0.00000000    
   0.00000000    
   0.00000000    
   0.00000000    
   0.00000000    
   0.00000000    
   0.00000000    
   0.00000000    
   0.00000000    
   0.00000000    
   0.00000000    
   0.00000000    
   3.00000000    
   0.00000000    
   0.00000000    
   0.00000000    
   0.00000000    
   1.00000000    
   0.00000000    
   0.00000000    
   0.00000000    
   0.00000000    
   0.00000000    
   0.00000000    
   0.00000000    
   0.00000000    
   0.00000000    
   0.00000000    
   0.00000000    
   0.00000000    
   0.00000000    
   0.00000000    
   0.00000000    
   0.00000000    
   0.00000000    
   0.00000000    
   0.00000000    
   0.00000000    
   0.00000000    
   0.00000000    
   0.00000000    
   0.00000000    
   0.00000000    
   0.00000000    
   0.00000000    
   0.00000000    
   0.00000000    
   0.00000000    
   0.00000000    
   0.00000000    
   0.00000000    
   0.00000000    
   0.00000000    
   0.00000000    
   0.00000000    
   0.00000000    
   0.00000000    
   0.00000000    
   0.00000000    
   0.00000000    
   0.00000000    
   0.00000000    
   0.00000000    
   0.00000000    
   0.00000000    
   0.00000000    
   0.00000000    
   0.00000000    
   0.00000000    
   0.00000000    
   0.00000000    
   0.00000000    
   0.00000000    
   0.00000000    
   0.00000000    
   0.00000000    
   1.00000000    
   0.00000000    
   0.00000000    
   0.00000000    
   0.00000000    
   0.00000000    
   0.00000000    
   0.00000000    
   1.00000000    
   1.00000000    
   0.00000000    
   0.00000000    
   0.00000000    
   0.00000000    
   0.00000000    
   0.00000000    
   0.00000000    
   0.00000000    
   0.00000000    
   0.00000000    
   0.00000000    
   0.00000000    
   0.00000000    
   0.00000000    
   0.00000000    
   0.00000000    
   0.00000000    
   0.00000000    
   0.00000000    
   0.00000000    
   0.00000000    
   0.00000000    
   0.00000000    
   0.00000000    
   0.00000000    
   0.00000000    
   0.00000000    
   0.00000000    
   0.00000000    
   0.00000000    
   0.00000000    
   0.00000000    
   0.00000000    
   0.00000000    
   0.00000000    
   0.00000000    
   0.00000000    
   0.00000000    
   0.00000000    
   0.00000000    
   0.00000000    
   0.00000000    
   0.00000000    
   0.00000000    
   0.00000000    
   0.00000000    
   0.00000000    
   0.00000000    
   0.00000000    
   0.00000000    
   1.00000000    
   0.00000000    
   0.00000000    
   2.00000000    
   0.00000000    
   1.00000000    
   2.00000000    
   0.00000000    
   0.00000000    
   0.00000000    
   0.00000000    
   0.00000000    
   0.00000000    
   1.00000000    
   0.00000000    
   0.00000000    
   0.00000000    
   0.00000000    
   0.00000000    
   1.00000000    
   0.00000000    
   0.00000000    
   0.00000000    
   0.00000000    
   0.00000000    
   0.00000000    
   0.00000000    
   0.00000000    
   0.00000000    
   0.00000000    
   0.00000000    
   0.00000000    
   0.00000000    
   0.00000000    
   0.00000000    
   0.00000000    
   0.00000000    
   0.00000000    
   0.00000000    
   0.00000000    
   0.00000000    
   0.00000000    
   0.00000000    
   0.00000000    
   0.00000000    
   0.00000000    
   0.00000000    
   0.00000000    
   0.00000000    
   0.00000000    
   0.00000000    
   0.00000000    
   0.00000000    
   0.00000000    
   0.00000000    
   0.00000000    
   0.00000000    
   0.00000000    
   0.00000000    
   0.00000000    
   0.00000000    
   0.00000000    
   0.00000000    
   0.00000000    
   0.00000000    
   0.00000000    
   0.00000000    
   1.00000000    
   0.00000000    
   0.00000000    
   0.00000000    
   1.00000000    
   0.00000000    
   0.00000000    
   0.00000000    
   0.00000000    
   0.00000000    
   0.00000000    
   1.00000000    
   1.00000000    
   0.00000000    
   0.00000000    
   0.00000000    
   0.00000000    
   0.00000000    
   0.00000000    
   0.00000000    
   0.00000000    
   0.00000000    
   0.00000000    
   0.00000000    
   0.00000000    
   0.00000000    
   0.00000000    
   0.00000000    
   0.00000000    
   0.00000000    
   0.00000000    
   0.00000000    
   0.00000000    
   0.00000000    
   0.00000000    
   0.00000000    
   0.00000000    
   0.00000000    
   0.00000000    
   0.00000000    
   0.00000000    
   0.00000000    
   0.00000000    
   0.00000000    
   0.00000000    
   0.00000000    
   0.00000000    
   0.00000000    
   0.00000000    
   0.00000000    
   0.00000000    
   0.00000000    
   0.00000000    
   0.00000000    
   0.00000000    
   0.00000000    
   0.00000000    
   0.00000000    
   0.00000000    
   0.00000000    
   0.00000000    
   0.00000000    
   1.00000000    
   0.00000000    
   0.00000000    
   0.00000000    
   0.00000000    
   0.00000000    
   0.00000000    
   0.00000000    
   0.00000000    
   0.00000000    
   0.00000000    
   1.00000000    
   0.00000000    
   1.00000000    
   0.00000000    
   1.00000000    
   1.00000000    
   0.00000000    
   0.00000000    
   0.00000000    
   0.00000000    
   0.00000000    
   0.00000000    
   0.00000000    
   0.00000000    
   0.00000000    
   0.00000000    
   0.00000000    
   0.00000000    
   0.00000000    
   0.00000000    
   0.00000000    
   0.00000000    
   0.00000000    
   0.00000000    
   0.00000000    
   0.00000000    
   0.00000000    
   0.00000000    
   0.00000000    
   0.00000000    
   0.00000000    
   0.00000000    
   0.00000000    
   0.00000000    
   0.00000000    
   0.00000000    
   0.00000000    
   0.00000000    
   0.00000000    
   0.00000000    
   0.00000000    
   0.00000000    
   0.00000000    
   0.00000000    
   0.00000000    
   0.00000000    
   0.00000000    
   0.00000000    
   0.00000000    
   0.00000000    
   1.00000000    
   0.00000000    
   0.00000000    
   0.00000000    
   0.00000000    
   0.00000000    
   1.00000000    
   1.00000000    
   0.00000000    
   0.00000000    
   0.00000000    
   0.00000000    
   0.00000000    
   0.00000000    
   0.00000000    
   0.00000000    
   0.00000000    
   0.00000000    
   1.00000000    
   1.00000000    
   0.00000000    
   0.00000000    
   0.00000000    
   0.00000000    
   0.00000000    
   0.00000000    
   0.00000000    
   0.00000000    
   0.00000000    
   0.00000000    
   0.00000000    
   0.00000000    
   0.00000000    
   0.00000000    
   0.00000000    
   0.00000000    
   0.00000000    
   0.00000000    
   0.00000000    
   0.00000000    
   0.00000000    
   0.00000000    
   0.00000000    
   0.00000000    
   0.00000000    
   0.00000000    
   0.00000000    
   0.00000000    
   0.00000000    
   0.00000000    
   0.00000000    
   0.00000000    
   0.00000000    
   0.00000000    
   0.00000000    
   0.00000000    
   0.00000000    
   0.00000000    
   0.00000000    
   0.00000000    
   0.00000000    
   0.00000000    
   0.00000000    
   0.00000000    
   0.00000000    
   0.00000000    
   0.00000000    
   0.00000000    
   0.00000000    
   0.00000000    
   0.00000000    
   0.00000000    
   0.00000000    
   0.00000000    
   0.00000000    
   0.00000000    
   0.00000000    
   1.00000000    
   0.00000000    
   2.00000000    
   1.00000000    
   0.00000000    
   0.00000000    
   0.00000000    
   1.00000000    
   2.00000000    
   0.00000000    
   0.00000000    
   0.00000000    
   0.00000000    
   0.00000000    
   0.00000000    
   0.00000000    
   0.00000000    
   0.00000000    
   0.00000000    
   0.00000000    
   0.00000000    
   0.00000000    
   0.00000000    
   0.00000000    
   0.00000000    
   0.00000000    
   0.00000000    
   0.00000000    
   0.00000000    
   0.00000000    
   0.00000000    
   0.00000000    
   0.00000000    
   0.00000000    
   0.00000000    
   0.00000000    
   0.00000000    
   0.00000000    
   0.00000000    
   0.00000000    
   0.00000000    
   0.00000000    
   0.00000000    
   0.00000000    
   0.00000000    
   0.00000000    
   0.00000000    
   0.00000000    
   0.00000000    
   0.00000000    
   0.00000000    
   0.00000000    
   0.00000000    
   1.00000000    
   0.00000000    
   0.00000000    
   0.00000000    
   0.00000000    
   0.00000000    
   0.00000000    
   0.00000000    
   0.00000000    
   0.00000000    
   0.00000000    
   0.00000000    
   0.00000000    
   0.00000000    
   0.00000000    
   0.00000000    
   0.00000000    
   0.00000000    
   0.00000000    
   0.00000000    
   0.00000000    
   0.00000000    
   0.00000000    
   0.00000000    
   0.00000000    
   0.00000000    
   0.00000000    
   0.00000000    
   0.00000000    
   0.00000000    
   0.00000000    
   0.00000000    
   0.00000000    
   0.00000000    
   0.00000000    
   0.00000000    
   0.00000000    
   0.00000000    
   0.00000000    
   0.00000000    
   0.00000000    
   0.00000000    
   0.00000000    
   0.00000000    
   0.00000000    
   0.00000000    
   0.00000000    
   0.00000000    
   0.00000000    
   0.00000000    
   0.00000000    
   0.00000000    
   0.00000000    
   0.00000000    
   0.00000000    
   0.00000000    
   0.00000000    
   0.00000000    
   0.00000000    
   0.00000000    
   0.00000000    
   0.00000000    
   0.00000000    
   0.00000000    
   0.00000000    
   0.00000000    
   1.00000000    
   0.00000000    
   0.00000000    
   0.00000000    
   0.00000000    
   1.00000000    
   0.00000000    
   0.00000000    
   0.00000000    
   0.00000000    
   0.00000000    
   0.00000000    
   0.00000000    
   1.00000000    
   0.00000000    
   1.00000000    
   1.00000000    
   0.00000000    
   0.00000000    
   0.00000000    
   0.00000000    
   0.00000000    
   0.00000000    
   0.00000000    
   0.00000000    
   0.00000000    
   0.00000000    
   0.00000000    
   0.00000000    
   0.00000000    
   0.00000000    
   0.00000000    
   0.00000000    
   0.00000000    
   0.00000000    
   0.00000000    
   0.00000000    
   0.00000000    
   0.00000000    
   0.00000000    
   0.00000000    
   0.00000000    
   0.00000000    
   0.00000000    
   0.00000000    
   0.00000000    
   0.00000000    
   0.00000000    
   0.00000000    
   0.00000000    
   0.00000000    
   0.00000000    
   0.00000000    
   0.00000000    
   0.00000000    
   0.00000000    
   0.00000000    
   0.00000000    
   0.00000000    
   0.00000000    
   0.00000000    
   0.00000000    
   0.00000000    
   0.00000000    
   0.00000000    
   0.00000000    
   0.00000000    
   0.00000000    
   0.00000000    
   0.00000000    
   1.00000000    
   0.00000000    
   0.00000000    
   0.00000000    
   0.00000000    
   0.00000000    
   0.00000000    
   0.00000000    
   0.00000000    
   2.00000000    
   0.00000000    
   0.00000000    
   0.00000000    
   0.00000000    
   0.00000000    
   0.00000000    
   0.00000000    
   0.00000000    
   0.00000000    
   0.00000000    
   0.00000000    
   0.00000000    
   0.00000000    
   0.00000000    
   0.00000000    
   0.00000000    
   0.00000000    
   0.00000000    
   0.00000000    
   0.00000000    
   0.00000000    
   0.00000000    
   0.00000000    
   0.00000000    
   0.00000000    
   0.00000000    
   0.00000000    
   0.00000000    
   0.00000000    
   0.00000000    
   0.00000000    
   0.00000000    
   0.00000000    
   0.00000000    
   0.00000000    
   0.00000000    
   0.00000000    
   0.00000000    
   0.00000000    
   0.00000000    
   0.00000000    
   0.00000000    
   0.00000000    
   0.00000000    
   0.00000000    
   0.00000000    
   0.00000000    
   1.00000000    
   0.00000000    
   0.00000000    
   0.00000000    
   0.00000000    
   0.00000000    
   0.00000000    
   0.00000000    
   0.00000000    
   0.00000000    
   0.00000000    
   1.00000000    
   0.00000000    
   0.00000000    
   0.00000000    
   0.00000000    
   1.00000000    
   0.00000000    
   0.00000000    
   0.00000000    
   0.00000000    
   0.00000000    
   0.00000000    
   0.00000000    
   0.00000000    
   0.00000000    
   0.00000000    
   0.00000000    
   0.00000000    
   0.00000000    
   0.00000000    
   0.00000000    
   0.00000000    
   0.00000000    
   0.00000000    
   0.00000000    
   0.00000000    
   0.00000000    
   0.00000000    
   0.00000000    
   0.00000000    
   0.00000000    
   0.00000000    
   0.00000000    
   0.00000000    
   0.00000000    
   0.00000000    
   0.00000000    
   0.00000000    
   0.00000000    
   0.00000000    
   0.00000000    
   0.00000000    
   0.00000000    
   0.00000000    
   0.00000000    
   0.00000000    
   0.00000000    
   0.00000000    
   0.00000000    
   0.00000000    
   0.00000000    
   0.00000000    
   0.00000000    
   0.00000000    
   0.00000000    
   0.00000000    
   0.00000000    
   0.00000000    
   0.00000000    
   2.00000000    
   1.00000000    
   0.00000000    
   0.00000000    
   1.00000000    
   0.00000000    
   0.00000000    
   0.00000000    
   0.00000000    
   0.00000000    
   0.00000000    
   0.00000000    
   0.00000000    
   0.00000000    
   0.00000000    
   0.00000000    
   0.00000000    
   0.00000000    
   0.00000000    
   0.00000000    
   0.00000000    
   0.00000000    
   0.00000000    
   0.00000000    
   0.00000000    
   0.00000000    
   0.00000000    
   0.00000000    
   0.00000000    
   0.00000000    
   0.00000000    
   0.00000000    
   0.00000000    
   0.00000000    
   0.00000000    
   0.00000000    
   0.00000000    
   0.00000000    
   0.00000000    
   0.00000000    
   0.00000000    
   0.00000000    
   0.00000000    
   0.00000000    
   0.00000000    
   0.00000000    
   0.00000000    
   0.00000000    
   0.00000000    
   0.00000000    
   0.00000000    
   0.00000000    
   0.00000000    
   0.00000000    
   0.00000000    
   0.00000000    
   0.00000000    
   0.00000000    
   0.00000000    
   0.00000000    
   0.00000000    
   0.00000000    
   0.00000000    
   0.00000000    
   0.00000000    
   0.00000000    
   0.00000000    
   0.00000000    
   0.00000000    
   0.00000000    
   0.00000000    
   0.00000000    
   1.00000000    
   0.00000000    
   0.00000000    
   0.00000000    
   0.00000000    
   0.00000000    
   0.00000000    
   0.00000000    
   0.00000000    
   0.00000000    
   0.00000000    
   0.00000000    
   0.00000000    
   0.00000000    
   0.00000000    
   0.00000000    
   0.00000000    
   0.00000000    
   0.00000000    
   0.00000000    
   0.00000000    
   0.00000000    
   0.00000000    
   0.00000000    
   0.00000000    
   0.00000000    
   0.00000000    
   0.00000000    
   0.00000000    
   0.00000000    
   0.00000000    
   0.00000000    
   0.00000000    
   0.00000000    
   0.00000000    
   0.00000000    
   0.00000000    
   0.00000000    
   0.00000000    
   0.00000000    
   0.00000000    
   0.00000000    
   0.00000000    
   0.00000000    
   0.00000000    
   0.00000000    
   0.00000000    
   0.00000000    
   0.00000000    
   0.00000000    
   0.00000000    
   0.00000000    
   0.00000000    
   0.00000000    
   0.00000000    
   0.00000000    
   0.00000000    
   0.00000000    
   0.00000000    
   0.00000000    
   0.00000000    
   0.00000000    
   0.00000000    
   0.00000000    
   0.00000000    
   0.00000000    
   0.00000000    
   0.00000000    
   0.00000000    
   0.00000000    
   0.00000000    
   0.00000000    
   0.00000000    
   0.00000000    
   0.00000000    
   0.00000000    
   0.00000000    
   0.00000000    
   0.00000000    
   0.00000000    
   0.00000000    
   0.00000000    
   0.00000000    
   0.00000000    
   0.00000000    
   0.00000000    
   0.00000000    
   0.00000000    
   0.00000000    
   0.00000000    
   0.00000000    
   0.00000000    
   0.00000000    
   0.00000000    
   0.00000000    
   0.00000000    
   0.00000000    
   0.00000000    
   0.00000000    
   0.00000000    
   0.00000000    
   0.00000000    
   0.00000000    
   0.00000000    
   0.00000000    
   0.00000000    
   0.00000000    
   0.00000000    
   0.00000000    
   0.00000000    
   0.00000000    
   0.00000000    
   0.00000000    
   0.00000000    
   0.00000000    
   0.00000000    
   0.00000000    
   0.00000000    
   0.00000000    
   0.00000000    
   0.00000000    
   0.00000000    
   0.00000000    
   0.00000000    
   0.00000000    
   0.00000000    
   0.00000000    
   0.00000000    
   0.00000000    
   0.00000000    
   0.00000000    
   0.00000000    
   0.00000000    
   0.00000000    
   0.00000000    
   0.00000000    
   0.00000000    
   0.00000000    
   0.00000000    
   0.00000000    
   0.00000000    
   0.00000000    
   0.00000000    
   0.00000000    
   0.00000000    
   0.00000000    
   0.00000000    
   0.00000000    
   0.00000000    
   0.00000000    
   0.00000000    
   0.00000000    
   0.00000000    
   0.00000000    
   0.00000000    
   0.00000000    
   0.00000000    
   0.00000000    
   0.00000000    
   0.00000000    
   0.00000000    
   0.00000000    
   0.00000000    
   0.00000000    
   0.00000000    
   0.00000000    
   0.00000000    
   0.00000000    
   0.00000000    
   0.00000000    
   0.00000000    
   0.00000000    
   0.00000000    
   0.00000000    
   0.00000000    
   0.00000000    
   0.00000000    
   0.00000000    
   0.00000000    
   0.00000000    
   0.00000000    
   0.00000000    
   0.00000000    
   0.00000000    
   0.00000000    
   0.00000000    
   0.00000000    
   0.00000000    
   0.00000000    
   0.00000000    
   0.00000000    
   0.00000000    
   0.00000000    
   0.00000000    
   0.00000000    
   0.00000000    
   0.00000000    
   0.00000000    
   0.00000000    
   0.00000000    
   0.00000000    
   0.00000000    
   0.00000000    
   0.00000000    
   0.00000000    
   0.00000000    
   0.00000000    
   0.00000000    
   0.00000000    
   0.00000000    
   0.00000000    
   0.00000000    
   0.00000000    
   0.00000000    
   0.00000000    
   0.00000000    
   0.00000000    
   0.00000000    
   0.00000000    
   0.00000000    
   0.00000000    
   0.00000000    
   0.00000000    
   0.00000000    
   0.00000000    
   0.00000000    
   0.00000000    
   0.00000000    
   0.00000000    
   0.00000000    
   0.00000000    
   0.00000000    
   0.00000000    
   0.00000000    
   0.00000000    
   0.00000000    
   0.00000000    
   0.00000000    
   0.00000000    
   0.00000000    
   0.00000000    
   0.00000000    
   0.00000000    
   0.00000000    
   0.00000000    
   0.00000000    
   0.00000000    
   0.00000000    
   0.00000000    
   0.00000000    
   0.00000000    
   0.00000000    
   0.00000000    
   0.00000000    
   0.00000000    
   0.00000000    
   0.00000000    
   0.00000000    
   0.00000000    
   0.00000000    
   0.00000000    
   0.00000000    
   0.00000000    
   0.00000000    
   0.00000000    
   0.00000000    
   0.00000000    
   0.00000000    
   0.00000000    
   0.00000000    
   0.00000000    
   0.00000000    
   0.00000000    
   0.00000000    
   0.00000000    
   0.00000000    
   0.00000000    
   0.00000000    
   0.00000000    
   0.00000000    
   0.00000000    
   0.00000000    
   0.00000000    
   0.00000000    
   0.00000000    
   0.00000000    
   0.00000000    
   0.00000000    
   0.00000000    
   0.00000000    
   0.00000000    
   0.00000000    
   0.00000000    
   0.00000000    
   0.00000000    
   0.00000000    
   0.00000000    
   0.00000000    
   0.00000000    
   0.00000000    
   0.00000000    
   0.00000000    
   0.00000000    
   0.00000000    
   0.00000000    
   0.00000000    
   0.00000000    
   0.00000000    
   0.00000000    
   0.00000000    
   0.00000000    
   0.00000000    
   0.00000000    
   0.00000000    
   0.00000000    
   0.00000000    
   0.00000000    
   0.00000000    
   0.00000000    
   0.00000000    
   0.00000000    
   0.00000000    
   0.00000000    
   0.00000000    
   0.00000000    
   0.00000000    
   0.00000000    
   0.00000000    
   0.00000000    
   0.00000000    
   0.00000000    
   0.00000000    
   0.00000000    
   0.00000000    
   0.00000000    
   0.00000000    
   0.00000000    
   0.00000000    
   0.00000000    
   0.00000000    
   0.00000000    
   0.00000000    
   0.00000000    
   0.00000000    
   0.00000000    
   0.00000000    
   0.00000000    
   0.00000000    
   0.00000000    
   0.00000000    
   0.00000000    
   0.00000000    
   0.00000000    
   0.00000000    
   0.00000000    
   0.00000000    
   0.00000000    
   0.00000000    
   0.00000000    
   0.00000000    
   0.00000000    
   0.00000000    
   0.00000000    
   0.00000000    
   0.00000000    
   0.00000000    
   0.00000000    
   0.00000000    
   0.00000000    
   0.00000000    
   0.00000000    
   0.00000000    
   0.00000000    
   0.00000000    
   0.00000000    
   0.00000000    
   0.00000000    
   0.00000000    
   0.00000000    
   0.00000000    
   0.00000000    
   0.00000000    
   0.00000000    
   0.00000000    
   0.00000000    
   0.00000000    
   0.00000000    
   0.00000000    
   0.00000000    
   0.00000000    
   0.00000000    
   0.00000000    
   0.00000000    
   0.00000000    
   0.00000000    
   0.00000000    
   0.00000000    
   0.00000000    
   0.00000000    
   0.00000000    
   0.00000000    
   0.00000000    
   0.00000000    
   0.00000000    
   0.00000000    
   0.00000000    
   0.00000000    
   0.00000000    
   0.00000000    
   0.00000000    
   0.00000000    
   0.00000000    
   0.00000000    
   0.00000000    
   0.00000000    
   0.00000000    
   0.00000000    
   0.00000000    
   0.00000000    
   0.00000000    
   0.00000000    
   0.00000000    
   0.00000000    
   0.00000000    
   0.00000000    
   0.00000000    
   0.00000000    
   0.00000000    
   0.00000000    
   0.00000000    
   0.00000000    
   0.00000000    
   0.00000000    
   0.00000000    
   0.00000000    
   0.00000000    
   0.00000000    
   0.00000000    
   0.00000000    
   0.00000000    
   0.00000000    
   0.00000000    
   0.00000000    
   0.00000000    
   0.00000000    
   0.00000000    
   0.00000000    
   0.00000000    
   0.00000000    
   0.00000000    
   0.00000000    
   0.00000000    
   0.00000000    
   0.00000000    
   0.00000000    
   0.00000000    
   0.00000000    
   0.00000000    
   0.00000000    
   0.00000000    
   0.00000000    
   0.00000000    
   0.00000000    
   0.00000000    
   0.00000000    
   0.00000000    
   0.00000000    
   0.00000000    
   0.00000000    
   0.00000000    
   0.00000000    
   0.00000000    
   0.00000000    
   0.00000000    
   0.00000000    
   0.00000000    
   0.00000000    
   0.00000000    
   0.00000000    
   0.00000000    
   0.00000000    
   0.00000000    
   0.00000000    
   0.00000000    
   0.00000000    
   0.00000000    
   0.00000000    
   0.00000000    
   0.00000000    
   0.00000000    
   0.00000000    
   0.00000000    
   0.00000000    
   0.00000000    
   0.00000000    
   0.00000000    
   0.00000000    
   0.00000000    
   0.00000000    
   0.00000000    
   0.00000000    
   0.00000000    
   0.00000000    
   0.00000000    
   0.00000000    
   0.00000000    
   0.00000000    
   0.00000000    
   0.00000000    
   0.00000000    
   0.00000000    
   0.00000000    
   0.00000000    
   0.00000000    
   0.00000000    
   0.00000000    
   0.00000000    
   0.00000000    
   0.00000000    
   0.00000000    
   0.00000000    
   0.00000000    
   0.00000000    
   0.00000000    
   0.00000000    
   0.00000000    
   0.00000000    
   0.00000000    
   0.00000000    
   0.00000000    
   0.00000000    
   0.00000000    
   0.00000000    
   0.00000000    
   0.00000000    
   0.00000000    
   0.00000000    
   0.00000000    
   0.00000000    
   0.00000000    
   0.00000000    
   0.00000000    
   0.00000000    
   0.00000000    
   0.00000000    
   0.00000000    
   0.00000000    
   0.00000000    
   0.00000000    
   0.00000000    
   0.00000000    
   0.00000000    
   0.00000000    
   0.00000000    
   0.00000000    
   0.00000000    
   0.00000000    
   0.00000000    
   0.00000000    
   0.00000000    
   0.00000000    
   0.00000000    
   0.00000000    
   0.00000000    
   0.00000000    
   0.00000000    
   0.00000000    
   0.00000000    
   0.00000000    
   0.00000000    
   0.00000000    
   0.00000000    
   0.00000000    
   0.00000000    
   0.00000000    
   0.00000000    
   0.00000000    
   0.00000000    
   0.00000000    
   0.00000000    
   0.00000000    
   0.00000000    
   0.00000000    
   0.00000000    
   0.00000000    
   0.00000000    
   0.00000000    
   0.00000000    
   0.00000000    
   0.00000000    
   0.00000000    
   0.00000000    
   0.00000000    
   0.00000000    
   0.00000000    
   0.00000000    
   0.00000000    
   0.00000000    
   0.00000000    
   0.00000000    
   0.00000000    
   0.00000000    
   0.00000000    
   0.00000000    
   0.00000000    
   0.00000000    
   0.00000000    
   0.00000000    
   0.00000000    
   0.00000000    
   0.00000000    
   0.00000000    
   0.00000000    
   0.00000000    
   0.00000000    
   0.00000000    
   0.00000000    
   0.00000000    
   0.00000000    
   0.00000000    
   0.00000000    
   0.00000000    
   0.00000000    
   0.00000000    
   0.00000000    
   0.00000000    
   0.00000000    
   0.00000000    
   0.00000000    
   0.00000000    
   0.00000000    
   0.00000000    
   0.00000000    
   0.00000000    
   0.00000000    
   0.00000000    
   0.00000000    
   0.00000000    
   0.00000000    
   0.00000000    
   0.00000000    
   0.00000000    
   0.00000000    
   0.00000000    
   0.00000000    
   0.00000000    
   0.00000000    
   0.00000000    
   0.00000000    
   0.00000000    
   0.00000000    
   0.00000000    
   0.00000000    
   0.00000000    
   0.00000000    
   0.00000000    
   0.00000000    
   0.00000000    
   0.00000000    
   0.00000000    
   0.00000000    
   0.00000000    
   0.00000000    
   0.00000000    
   0.00000000    
   0.00000000    
   0.00000000    
   0.00000000    
   0.00000000    
   0.00000000    
   0.00000000    
   0.00000000    
   0.00000000    
   0.00000000    
   0.00000000    
   0.00000000    
   0.00000000    
   0.00000000    
   0.00000000    
   0.00000000    
   0.00000000    
   0.00000000    
   0.00000000    
   0.00000000    
   0.00000000    
   0.00000000    
   0.00000000    
   0.00000000    
   0.00000000    
   0.00000000    
   0.00000000    
   0.00000000    
   0.00000000    
   0.00000000    
   0.00000000    
   0.00000000    
   0.00000000    
   0.00000000    
   0.00000000    
   0.00000000    
   0.00000000    
   0.00000000    
   0.00000000    
   0.00000000    
   0.00000000    
   0.00000000    
   0.00000000    
   0.00000000    
   0.00000000    
   0.00000000    
   0.00000000    
   0.00000000    
   0.00000000    
   0.00000000    
   0.00000000    
   0.00000000    
   0.00000000    
   0.00000000    
   0.00000000    
   0.00000000    
   0.00000000    
   0.00000000    
   0.00000000    
   0.00000000    
   0.00000000    
   0.00000000    
   0.00000000    
   0.00000000    
   0.00000000    
   0.00000000    
   0.00000000    
   0.00000000    
   0.00000000    
   0.00000000    
   0.00000000    
   0.00000000    
   0.00000000    
   0.00000000    
   0.00000000    
   0.00000000    
   0.00000000    
   0.00000000    
   0.00000000    
   0.00000000    
   0.00000000    
   0.00000000    
   0.00000000    
   0.00000000    
   0.00000000    
   0.00000000    
   0.00000000    
   0.00000000    
   0.00000000    
   0.00000000    
   0.00000000    
   0.00000000    
   0.00000000    
   0.00000000    
   0.00000000    
   0.00000000    
   0.00000000    
   0.00000000    
   0.00000000    
   0.00000000    
   0.00000000    
   0.00000000    
   0.00000000    
   0.00000000    
   0.00000000    
   0.00000000    
   0.00000000    
   0.00000000    
   0.00000000    
   0.00000000    
   0.00000000    
   0.00000000    
   0.00000000    
   0.00000000    
   0.00000000    
   0.00000000    
   0.00000000    
   0.00000000    
   0.00000000    
   0.00000000    
   0.00000000    
   0.00000000    
   0.00000000    
   0.00000000    
   0.00000000    
   0.00000000    
   0.00000000    
   0.00000000    
   0.00000000    
   0.00000000    
   0.00000000    
   0.00000000    
   0.00000000    
   0.00000000    
   0.00000000    
   0.00000000    
   0.00000000    
   0.00000000    
   0.00000000    
   0.00000000    
   0.00000000    
   0.00000000    
   0.00000000    
   0.00000000    
   0.00000000    
   0.00000000    
   0.00000000    
   0.00000000    
   0.00000000    
   0.00000000    
   0.00000000    
   0.00000000    
   0.00000000    
   0.00000000    
   0.00000000    
   0.00000000    
   0.00000000    
   0.00000000    
   0.00000000    
   0.00000000    
   0.00000000    
   0.00000000    
   0.00000000    
   0.00000000    
   0.00000000    
   0.00000000    
   0.00000000    
   0.00000000    
   0.00000000    
   0.00000000    
   0.00000000    
   0.00000000    
   0.00000000    
   0.00000000    
   0.00000000    
   0.00000000    
   0.00000000    
   0.00000000    
   0.00000000    
   0.00000000    
   0.00000000    
   0.00000000    
   0.00000000    
   0.00000000    
   0.00000000    
   0.00000000    
   0.00000000    
   0.00000000    
   0.00000000    
   0.00000000    
   0.00000000    
   0.00000000    
   0.00000000    
   0.00000000    
   0.00000000    
   0.00000000    
   0.00000000    
   0.00000000    
   0.00000000    
   0.00000000    
   0.00000000    
   0.00000000    
   0.00000000    
   0.00000000    
   0.00000000    
   0.00000000    
   0.00000000    
   0.00000000    
   0.00000000    
   0.00000000    
   0.00000000    
   0.00000000    
   0.00000000    
   0.00000000    
   0.00000000    
   0.00000000    
   0.00000000    
   0.00000000    
   0.00000000    
   0.00000000    
   0.00000000    
   0.00000000    
   0.00000000    
   0.00000000    
   0.00000000    
   0.00000000    
   0.00000000    
   0.00000000    
   0.00000000    
   0.00000000    
   0.00000000    
   0.00000000    
   0.00000000    
   0.00000000    
   0.00000000    
   0.00000000    
   0.00000000    
   0.00000000    
   0.00000000    
   0.00000000    
   0.00000000    
   0.00000000    
   0.00000000    
   0.00000000    
   0.00000000    
   0.00000000    
   0.00000000    
   0.00000000    
   0.00000000    
   0.00000000    
   0.00000000    
   0.00000000    
   0.00000000    
   0.00000000    
   0.00000000    
   0.00000000    
   0.00000000    
   0.00000000    
   0.00000000    
   0.00000000    
   0.00000000    
   0.00000000    
   0.00000000    
   0.00000000    
   0.00000000    
   0.00000000    
   0.00000000    
   0.00000000    
   0.00000000    
   0.00000000    
   0.00000000    
   0.00000000    
   0.00000000    
   0.00000000    
   0.00000000    
   0.00000000    
   0.00000000    
   0.00000000    
   0.00000000    
   0.00000000    
   0.00000000    
   0.00000000    
   0.00000000    
   0.00000000    
   0.00000000    
   0.00000000    
   0.00000000    
   0.00000000    
   0.00000000    
   0.00000000    
   0.00000000    
   0.00000000    
   0.00000000    
   0.00000000    
   0.00000000    
   0.00000000    
   0.00000000    
   0.00000000    
   0.00000000    
   0.00000000    
   0.00000000    
   0.00000000    
   0.00000000    
   0.00000000    
   0.00000000    
   0.00000000    
   0.00000000    
   0.00000000    
   0.00000000    
   0.00000000    
   0.00000000    
   0.00000000    
   0.00000000    
   0.00000000    
   0.00000000    
   0.00000000    
   0.00000000    
   0.00000000    
   0.00000000    
   0.00000000    
   0.00000000    
   0.00000000    
   0.00000000    
   0.00000000    
   0.00000000    
   0.00000000    
   0.00000000    
   0.00000000    
   0.00000000    
   0.00000000    
   0.00000000    
   0.00000000    
   0.00000000    
   0.00000000    
   0.00000000    
   0.00000000    
   0.00000000    
   0.00000000    
   0.00000000    
   0.00000000    
   0.00000000    
   0.00000000    
   0.00000000    
   0.00000000    
   0.00000000    
   0.00000000    
   0.00000000    
   0.00000000    
   0.00000000    
   0.00000000    
   0.00000000    
   0.00000000    
   0.00000000    
   0.00000000    
   0.00000000    
   0.00000000    
   0.00000000    
   0.00000000    
   0.00000000    
   0.00000000    
   0.00000000    
   0.00000000    
   0.00000000    
   0.00000000    
   0.00000000    
   0.00000000    
   0.00000000    
   0.00000000    
   0.00000000    
   0.00000000    
   0.00000000    
   0.00000000    
   0.00000000    
   0.00000000    
   0.00000000    
   0.00000000    
   0.00000000    
   0.00000000    
   0.00000000    
   0.00000000    
   0.00000000    
   0.00000000    
   0.00000000    
   0.00000000    
   0.00000000    
   0.00000000    
   0.00000000    
   0.00000000    
   0.00000000    
   0.00000000    
   0.00000000    
   0.00000000    
   0.00000000    
   0.00000000    
   0.00000000    
   0.00000000    
   0.00000000    
   0.00000000    
   0.00000000    
   0.00000000    
   0.00000000    
   0.00000000    
   0.00000000    
   0.00000000    
   0.00000000    
   0.00000000    
   0.00000000    
   0.00000000    
   0.00000000    
   0.00000000    
   0.00000000    
   0.00000000    
   0.00000000    
   0.00000000    
   0.00000000    
   0.00000000    
   0.00000000    
   0.00000000    
   0.00000000    
   0.00000000    
   0.00000000    
   0.00000000    
   0.00000000    
   0.00000000    
   0.00000000    
   0.00000000    
   0.00000000    
   0.00000000    
   0.00000000    
   0.00000000    
   0.00000000    
   0.00000000    
   0.00000000    
   0.00000000    
   0.00000000    
   0.00000000    
   0.00000000    
   0.00000000    
   0.00000000    
   0.00000000    
   0.00000000    
   0.00000000    
   0.00000000    
   0.00000000    
   0.00000000    
   0.00000000    
   0.00000000    
   0.00000000    
   0.00000000    
   0.00000000    
   0.00000000    
   0.00000000    
   0.00000000    
   0.00000000    
   0.00000000    
   0.00000000    
   0.00000000    
   0.00000000    
   0.00000000    
   0.00000000    
   0.00000000    
   0.00000000    
   0.00000000    
   0.00000000    
   0.00000000    
   0.00000000    
   0.00000000    
   0.00000000    
   0.00000000    
   0.00000000    
   0.00000000    
   0.00000000    
   0.00000000    
   0.00000000    
   0.00000000    
   0.00000000    
   0.00000000    
   0.00000000    
   0.00000000    
   0.00000000    
   0.00000000    
   0.00000000    
   0.00000000    
   0.00000000    
   0.00000000    
   0.00000000    
   0.00000000    
   0.00000000    
   0.00000000    
   0.00000000    
   0.00000000    
   0.00000000    
   0.00000000    
   0.00000000    
   0.00000000    
   0.00000000    
   0.00000000    
   0.00000000    
   0.00000000    
   0.00000000    
   0.00000000    
   0.00000000    
   0.00000000    
   0.00000000    
   0.00000000    
   0.00000000    
   0.00000000    
   0.00000000    
   0.00000000    
   0.00000000    
   0.00000000    
   0.00000000    
   0.00000000    
   0.00000000    
   0.00000000    
   0.00000000    
   0.00000000    
   0.00000000    
   0.00000000    
   0.00000000    
   0.00000000    
   0.00000000    
   0.00000000    
   0.00000000    
   0.00000000    
   0.00000000    
   0.00000000    
   0.00000000    
   0.00000000    
   0.00000000    
   0.00000000    
   0.00000000    
   0.00000000    
   0.00000000    
   0.00000000    
   0.00000000    
   0.00000000    
   0.00000000    
   0.00000000    
   0.00000000    
   0.00000000    
   0.00000000    
   0.00000000    
   0.00000000    
   0.00000000    
   0.00000000    
   0.00000000    
   0.00000000    
   0.00000000    
   0.00000000    
   0.00000000    
   0.00000000    
   0.00000000    
   0.00000000    
   0.00000000    
   0.00000000    
   0.00000000    
   0.00000000    
   0.00000000    
   0.00000000    
   0.00000000    
   0.00000000    
   0.00000000    
   0.00000000    
   0.00000000    
   0.00000000    
   0.00000000    
   0.00000000    
   0.00000000    
   0.00000000    
   0.00000000    
   0.00000000    
   0.00000000    
   0.00000000    
   0.00000000    
   0.00000000    
   0.00000000    
   0.00000000    
   0.00000000    
   0.00000000    
   0.00000000    
   0.00000000    
   0.00000000    
   0.00000000    
   0.00000000    
   0.00000000    
   0.00000000    
   0.00000000    
   0.00000000    
   0.00000000    
   0.00000000    
   0.00000000    
   0.00000000    
   0.00000000    
   0.00000000    
   0.00000000    
   0.00000000    
   0.00000000    
   0.00000000    
   0.00000000    
   0.00000000    
   0.00000000    
   0.00000000    
   0.00000000    
   0.00000000    
   0.00000000    
   0.00000000    
   0.00000000    
   0.00000000    
   0.00000000    
   0.00000000    
   0.00000000    
   0.00000000    
   0.00000000    
   0.00000000    
   0.00000000    
   0.00000000    
   0.00000000    
   0.00000000    
   0.00000000    
   0.00000000    
   0.00000000    
   0.00000000    
   0.00000000    
   0.00000000    
   0.00000000    
   0.00000000    
   0.00000000    
   0.00000000    
   0.00000000    
   0.00000000    
   0.00000000    
   0.00000000    
   0.00000000    
   0.00000000    
   0.00000000    
   0.00000000    
   0.00000000    
   0.00000000    
   0.00000000    
   0.00000000    
   0.00000000    
   0.00000000    
   0.00000000    
   0.00000000    
   0.00000000    
   0.00000000    
   0.00000000    
   0.00000000    
   0.00000000    
   0.00000000    
   0.00000000    
   0.00000000    
   0.00000000    
   0.00000000    
   0.00000000    
   0.00000000    
   0.00000000    
   0.00000000    
   0.00000000    
   0.00000000    
   0.00000000    
   0.00000000    
   0.00000000    
   0.00000000    
   0.00000000    
   0.00000000    
   0.00000000    
   0.00000000    
   0.00000000    
   0.00000000    
   0.00000000    
   0.00000000    
   0.00000000    
   0.00000000    
   0.00000000    
   0.00000000    
   0.00000000    
   0.00000000    
   0.00000000    
   0.00000000    
   0.00000000    
   0.00000000    
   0.00000000    
   0.00000000    
   0.00000000    
   0.00000000    
   0.00000000    
   0.00000000    
   0.00000000    
   0.00000000    
   0.00000000    
   0.00000000    
   0.00000000    
   0.00000000    
   0.00000000    
   0.00000000    
   0.00000000    
   0.00000000    
   0.00000000    
   0.00000000    
   0.00000000    
   0.00000000    
   0.00000000    
   0.00000000    
   0.00000000    
   0.00000000    
   0.00000000    
   0.00000000    
   0.00000000    
   0.00000000    
   0.00000000    
   0.00000000    
   0.00000000    
   0.00000000    
   0.00000000    
   0.00000000    
   0.00000000    
   0.00000000    
   0.00000000    
   0.00000000    
   0.00000000    
   0.00000000    
   0.00000000    
   0.00000000    
   0.00000000    
   0.00000000    
   0.00000000    
   0.00000000    
   0.00000000    
   0.00000000    
   0.00000000    
   0.00000000    
   0.00000000    
   0.00000000    
   0.00000000    
   0.00000000    
   0.00000000    
   0.00000000    
   0.00000000    
   0.00000000    
   0.00000000    
   0.00000000    
   0.00000000    
   0.00000000    
   0.00000000    
   0.00000000    
   0.00000000    
   0.00000000    
   0.00000000    
   0.00000000    
   0.00000000    
   0.00000000    
   0.00000000    
   0.00000000    
   0.00000000    
   0.00000000    
   0.00000000    
   0.00000000    
   0.00000000    
   0.00000000    
   0.00000000    
   0.00000000    
   0.00000000    
   0.00000000    
   0.00000000    
   0.00000000    
   0.00000000    
   0.00000000    
   0.00000000    
   0.00000000    
   0.00000000    
   0.00000000    
   0.00000000    
   0.00000000    
   0.00000000    
   0.00000000    
   0.00000000    
   0.00000000    
   0.00000000    
   0.00000000    
   0.00000000    
   0.00000000    
   0.00000000    
   0.00000000    
   0.00000000    
   0.00000000    
   0.00000000    
   0.00000000    
   0.00000000    
   0.00000000    
   0.00000000    
   0.00000000    
   0.00000000    
   0.00000000    
   0.00000000    
   0.00000000    
   0.00000000    
   0.00000000    
   0.00000000    
   0.00000000    
   0.00000000    
   0.00000000    
   0.00000000    
   0.00000000    
   0.00000000    
   0.00000000    
   0.00000000    
   0.00000000    
   0.00000000    
   0.00000000    
   0.00000000    
   0.00000000    
   0.00000000    
   0.00000000    
   0.00000000    
   0.00000000    
   0.00000000    
   0.00000000    
   0.00000000    
   0.00000000    
   0.00000000    
   0.00000000    
   0.00000000    
   0.00000000    
   0.00000000    
   0.00000000    
   0.00000000    
   0.00000000    
   0.00000000    
   0.00000000    
   0.00000000    
   0.00000000    
   0.00000000    
   0.00000000    
   0.00000000    
   0.00000000    
   0.00000000    
   0.00000000    
   0.00000000    
   0.00000000    
   0.00000000    
   0.00000000    
   0.00000000    
   0.00000000    
   0.00000000    
   0.00000000    
   0.00000000    
   0.00000000    
   0.00000000    
   0.00000000    
   0.00000000    
   0.00000000    
   0.00000000    
   0.00000000    
   0.00000000    
   0.00000000    
   0.00000000    
   0.00000000    
   0.00000000    
   0.00000000    
   0.00000000    
   0.00000000    
   0.00000000    
   0.00000000    
   0.00000000    
   0.00000000    
   0.00000000    
   0.00000000    
   0.00000000    
   0.00000000    
   0.00000000    
   0.00000000    
   0.00000000    
   0.00000000    
   0.00000000    
   0.00000000    
   0.00000000    
   0.00000000    
   0.00000000    
   0.00000000    
   0.00000000    
   0.00000000    
   0.00000000    
   0.00000000    
   0.00000000    
   0.00000000    
   0.00000000    
   0.00000000    
   0.00000000    
   0.00000000    
   0.00000000    
   0.00000000    
   0.00000000    
   0.00000000    
   0.00000000    
   0.00000000    
   0.00000000    
   0.00000000    
   0.00000000    
   0.00000000    
   0.00000000    
   0.00000000    
   0.00000000    
   0.00000000    
   0.00000000    
   0.00000000    
   0.00000000    
   0.00000000    
   0.00000000    
   0.00000000    
   0.00000000    
   0.00000000    
   0.00000000    
   0.00000000    
   0.00000000    
   0.00000000    
   0.00000000    
   0.00000000    
   0.00000000    
   0.00000000    
   0.00000000    
   0.00000000    
   0.00000000    
   0.00000000    
   0.00000000    
   0.00000000    
   0.00000000    
   0.00000000    
   0.00000000    
   0.00000000    
   0.00000000    
   0.00000000    
   0.00000000    
   0.00000000    
   0.00000000    
   0.00000000    
   0.00000000    
   0.00000000    
   0.00000000    
   0.00000000    
   0.00000000    
   0.00000000    
   0.00000000    
   0.00000000    
   0.00000000    
   0.00000000    
   0.00000000    
   0.00000000    
   0.00000000    
   0.00000000    
   0.00000000    
   0.00000000    
   0.00000000    
   0.00000000    
   0.00000000    
   0.00000000    
   0.00000000    
   0.00000000    
   0.00000000    
   0.00000000    
   0.00000000    
   0.00000000    
   0.00000000    
   0.00000000    
   0.00000000    
   0.00000000    
   0.00000000    
   0.00000000    
   0.00000000    
   0.00000000    
   0.00000000    
   0.00000000    
   0.00000000    
   0.00000000    
   0.00000000    
   0.00000000    
   0.00000000    
   0.00000000    
   0.00000000    
   0.00000000    
   0.00000000    
   0.00000000    
   0.00000000    
   0.00000000    
   0.00000000    
   0.00000000    
   0.00000000    
   0.00000000    
   0.00000000    
   0.00000000    
   0.00000000    
   0.00000000    
   0.00000000    
   0.00000000    
   0.00000000    
   0.00000000    
   0.00000000    
   0.00000000    
   0.00000000    
   0.00000000    
   0.00000000    
   0.00000000    
   0.00000000    
   0.00000000    
   0.00000000    
   0.00000000    
   0.00000000    
   0.00000000    
   0.00000000    
   0.00000000    
   0.00000000    
   0.00000000    
   0.00000000    
   0.00000000    
   0.00000000    
   0.00000000    
   0.00000000    
   0.00000000    
   0.00000000    
   0.00000000    
   0.00000000    
   0.00000000    
   0.00000000    
   0.00000000    
   0.00000000    
   0.00000000    
   0.00000000    
   0.00000000    
   0.00000000    
   0.00000000    
   0.00000000    
   0.00000000    
   0.00000000    
   0.00000000    
   0.00000000    
   0.00000000    
   0.00000000    
   0.00000000    
   0.00000000    
   0.00000000    
   0.00000000    
   0.00000000    
   0.00000000    
   0.00000000    
   0.00000000    
   0.00000000    
   0.00000000    
   0.00000000    
   0.00000000    
   0.00000000    
   0.00000000    
   0.00000000    
   0.00000000    
   0.00000000    
   0.00000000    
   0.00000000    
   0.00000000    
   0.00000000    
   0.00000000    
   0.00000000    
   0.00000000    
   0.00000000    
   0.00000000    
   0.00000000    
   0.00000000    
   0.00000000    
   0.00000000    
   0.00000000    
   0.00000000    
   0.00000000    
   0.00000000    
   0.00000000    
   0.00000000    
   0.00000000    
   0.00000000    
   0.00000000    
   0.00000000    
   0.00000000    
   0.00000000    
   0.00000000    
   0.00000000    
   0.00000000    
   0.00000000    
   0.00000000    
   0.00000000    
   0.00000000    
   0.00000000    
   0.00000000    
   0.00000000    
   0.00000000    
   0.00000000    
   0.00000000    
   0.00000000    
   0.00000000    
   0.00000000    
   0.00000000    
   0.00000000    
   0.00000000    
   0.00000000    
   0.00000000    
   0.00000000    
   0.00000000    
   0.00000000    
   0.00000000    
   0.00000000    
   0.00000000    
   0.00000000    
   0.00000000    
   0.00000000    
   0.00000000    
   0.00000000    
   0.00000000    
   0.00000000    
   0.00000000    
   0.00000000    
   0.00000000    
   0.00000000    
   0.00000000    
   0.00000000    
   0.00000000    
   0.00000000    
   0.00000000    
   0.00000000    
   0.00000000    
   0.00000000    
   0.00000000    
   0.00000000    
   0.00000000    
   0.00000000    
   0.00000000    
   0.00000000    
   0.00000000    
   0.00000000    
   0.00000000    
   0.00000000    
   0.00000000    
   0.00000000    
   0.00000000    
   0.00000000    
   0.00000000    
   0.00000000    
   0.00000000    
   0.00000000    
   0.00000000    
   0.00000000    
   0.00000000    
   0.00000000    
   0.00000000    
   0.00000000    
   0.00000000    
   0.00000000    
   0.00000000    
   0.00000000    
   0.00000000    
   0.00000000    
   0.00000000    
   0.00000000    
   0.00000000    
   0.00000000    
   0.00000000    
   0.00000000    
   0.00000000    
   0.00000000    
   0.00000000    
   0.00000000    
   0.00000000    
   0.00000000    
   0.00000000    
   0.00000000    
   0.00000000    
   0.00000000    
   0.00000000    
   0.00000000    
   0.00000000    
   0.00000000    
   0.00000000    
   0.00000000    
   0.00000000    
   0.00000000    
   0.00000000    
   0.00000000    
   0.00000000    
   0.00000000    
   0.00000000    
   0.00000000    
   0.00000000    
   0.00000000    
   0.00000000    
   0.00000000    
   0.00000000    
   0.00000000    
   0.00000000    
   0.00000000    
   0.00000000    
   0.00000000    
   0.00000000    
   0.00000000    
   0.00000000    
   0.00000000    
   0.00000000    
   0.00000000    
   0.00000000    
   0.00000000    
   0.00000000    
   0.00000000    
   0.00000000    
   0.00000000    
   0.00000000    
   0.00000000    
   0.00000000    
   0.00000000    
   0.00000000    
   0.00000000    
   0.00000000    
   0.00000000    
   0.00000000    
   0.00000000    
   0.00000000    
   0.00000000    
   0.00000000    
   0.00000000    
   0.00000000    
   0.00000000    
   0.00000000    
   0.00000000    
   0.00000000    
   0.00000000    
   0.00000000    
   0.00000000    
   0.00000000    
   0.00000000    
   0.00000000    
   0.00000000    
   0.00000000    
   0.00000000    
   0.00000000    
   0.00000000    
   0.00000000    
   0.00000000    
   0.00000000    
   0.00000000    
   0.00000000    
   0.00000000    
   0.00000000    
   0.00000000    
   0.00000000    
   0.00000000    
   0.00000000    
   0.00000000    
   0.00000000    
   0.00000000    
   0.00000000    
   0.00000000    
   0.00000000    
   0.00000000    
   0.00000000    
   0.00000000    
   0.00000000    
   0.00000000    
   0.00000000    
   0.00000000    
   0.00000000    
   0.00000000    
   0.00000000    
   0.00000000    
   0.00000000    
   0.00000000    
   0.00000000    
   0.00000000    
   0.00000000    
   0.00000000    
   0.00000000    
   0.00000000    
   0.00000000    
   0.00000000    
   0.00000000    
   0.00000000    
   0.00000000    
   0.00000000    
   0.00000000    
   0.00000000    
   0.00000000    
   0.00000000    
   0.00000000    
   0.00000000    
   0.00000000    
   0.00000000    
   0.00000000    
   0.00000000    
   0.00000000    
   0.00000000    
   0.00000000    
   0.00000000    
   0.00000000    
   0.00000000    
   0.00000000    
   0.00000000    
   0.00000000    
   0.00000000    
   0.00000000    
   0.00000000    
   0.00000000    
   0.00000000    
   0.00000000    
   0.00000000    
   0.00000000    
   0.00000000    
   0.00000000    
   0.00000000    
   0.00000000    
   0.00000000    
   0.00000000    
   0.00000000    
   0.00000000    
   0.00000000    
   0.00000000    
   0.00000000    
   0.00000000    
   0.00000000    
   0.00000000    
   0.00000000    
   0.00000000    
   0.00000000    
   0.00000000    
   0.00000000    
   0.00000000    
   0.00000000    
   0.00000000    
   0.00000000    
   0.00000000    
   0.00000000    
   0.00000000    
   0.00000000    
   0.00000000    
   0.00000000    
   0.00000000    
   0.00000000    
   0.00000000    
   0.00000000    
   0.00000000    
   0.00000000    
   0.00000000    
   0.00000000    
   0.00000000    
   0.00000000    
   0.00000000    
   0.00000000    
   0.00000000    
   0.00000000    
   0.00000000    
   0.00000000    
   0.00000000    
   0.00000000    
   0.00000000    
   0.00000000    
   0.00000000    
   0.00000000    
   0.00000000    
   0.00000000    
   0.00000000    
   0.00000000    
   0.00000000    
   0.00000000    
   0.00000000    
   0.00000000    
   0.00000000    
   0.00000000    
   0.00000000    
   0.00000000    
   0.00000000    
   0.00000000    
   0.00000000    
   0.00000000    
   0.00000000    
   0.00000000    
   0.00000000    
   0.00000000    
   0.00000000    
   0.00000000    
   0.00000000    
   0.00000000    
   0.00000000    
   0.00000000    
   0.00000000    
   0.00000000    
   0.00000000    
   0.00000000    
   0.00000000    
   0.00000000    
   0.00000000    
   0.00000000    
   0.00000000    
   0.00000000    
   0.00000000    
   0.00000000    
   0.00000000    
   0.00000000    
   0.00000000    
   0.00000000    
   0.00000000    
   0.00000000    
   0.00000000    
   0.00000000    
   0.00000000    
   0.00000000    
   0.00000000    
   0.00000000    
   0.00000000    
   0.00000000    
   0.00000000    
   0.00000000    
   0.00000000    
   0.00000000    
   0.00000000    
   0.00000000    
   0.00000000    
   0.00000000    
   0.00000000    
   0.00000000    
   0.00000000    
   0.00000000    
   0.00000000    
   0.00000000    
   0.00000000    
   0.00000000    
   0.00000000    
   0.00000000    
   0.00000000    
   0.00000000    
   0.00000000    
   0.00000000    
   0.00000000    
   0.00000000    
   0.00000000    
   0.00000000    
   0.00000000    
   0.00000000    
   0.00000000    
   0.00000000    
   0.00000000    
   0.00000000    
   0.00000000    
   0.00000000    
   0.00000000    
   0.00000000    
   0.00000000    
   0.00000000    
   0.00000000    
   0.00000000    
   0.00000000    
   0.00000000    
   0.00000000    
   0.00000000    
   0.00000000    
   0.00000000    
   0.00000000    
   0.00000000    
   0.00000000    
   0.00000000    
   0.00000000    
   0.00000000    
   0.00000000    
   0.00000000    
   0.00000000    
   0.00000000    
   0.00000000    
   0.00000000    
   0.00000000    
   0.00000000    
   0.00000000    
   0.00000000    
   0.00000000    
   0.00000000    
   0.00000000    
   0.00000000    
   0.00000000    
   0.00000000    
   0.00000000    
   0.00000000    
   0.00000000    
   0.00000000    
   0.00000000    
   0.00000000    
   0.00000000    
   0.00000000    
   0.00000000    
   0.00000000    
   0.00000000    
   0.00000000    
   0.00000000    
   0.00000000    
   0.00000000    
   0.00000000    
   0.00000000    
   0.00000000    
   0.00000000    
   0.00000000    
   0.00000000    
   0.00000000    
   0.00000000    
   0.00000000    
   0.00000000    
   0.00000000    
   0.00000000    
   0.00000000    
   0.00000000    
   0.00000000    
   0.00000000    
   0.00000000    
   0.00000000    
   0.00000000    
   0.00000000    
   0.00000000    
   0.00000000    
   0.00000000    
   0.00000000    
   0.00000000    
   0.00000000    
   0.00000000    
   0.00000000    
   0.00000000    
   0.00000000    
   0.00000000    
   0.00000000    
   0.00000000    
   0.00000000    
   0.00000000    
   0.00000000    
   0.00000000    
   0.00000000    
   0.00000000    
   0.00000000    
   0.00000000    
   0.00000000    
   0.00000000    
   0.00000000    
   0.00000000    
   0.00000000    
   0.00000000    
   0.00000000    
   0.00000000    
   0.00000000    
   0.00000000    
   0.00000000    
   0.00000000    
   0.00000000    
   0.00000000    
   0.00000000    
   0.00000000    
   0.00000000    
   0.00000000    
   0.00000000    
   0.00000000    
   0.00000000    
   0.00000000    
   0.00000000    
   0.00000000    
   0.00000000    
   0.00000000    
   0.00000000    
   0.00000000    
   0.00000000    
   0.00000000    
   0.00000000    
   0.00000000    
   0.00000000    
   0.00000000    
   0.00000000    
   0.00000000    
   0.00000000    
   0.00000000    
   0.00000000    
   0.00000000    
   0.00000000    
   0.00000000    
   0.00000000    
   0.00000000    
   0.00000000    
   0.00000000    
   0.00000000    
   0.00000000    
   0.00000000    
   0.00000000    
   0.00000000    
   0.00000000    
   0.00000000    
   0.00000000    
   0.00000000    
   0.00000000    
   0.00000000    
   0.00000000    
   0.00000000    
   0.00000000    
   0.00000000    
   0.00000000    
   0.00000000    
   0.00000000    
   0.00000000    
   0.00000000    
   0.00000000    
   0.00000000    
   0.00000000    
   0.00000000    
   0.00000000    
   0.00000000    
   0.00000000    
   0.00000000    
   0.00000000    
   0.00000000    
   0.00000000    
   0.00000000    
   0.00000000    
   0.00000000    
   0.00000000    
   0.00000000    
   0.00000000    
   0.00000000    
   0.00000000    
   0.00000000    
   0.00000000    
   0.00000000    
   0.00000000    
   0.00000000    
   0.00000000    
   0.00000000    
   0.00000000    
   0.00000000    
   0.00000000    
   0.00000000    
   0.00000000    
   0.00000000    
   0.00000000    
   0.00000000    
   0.00000000    
   0.00000000    
   0.00000000    
   0.00000000    
   0.00000000    
   0.00000000    
   0.00000000    
   0.00000000    
   0.00000000    
   0.00000000    
   0.00000000    
   0.00000000    
   0.00000000    
   0.00000000    
   0.00000000    
   0.00000000    
   0.00000000    
   0.00000000    
   0.00000000    
   0.00000000    
   0.00000000    
   0.00000000    
   0.00000000    
   0.00000000    
   0.00000000    
   0.00000000    
   0.00000000    
   0.00000000    
   0.00000000    
   0.00000000    
   0.00000000    
   0.00000000    
   0.00000000    
   0.00000000    
   0.00000000    
   0.00000000    
   0.00000000    
   0.00000000    
   0.00000000    
   0.00000000    
   0.00000000    
   0.00000000    
   0.00000000    
   0.00000000    
   0.00000000    
   0.00000000    
   0.00000000    
   0.00000000    
   0.00000000    
   0.00000000    
   0.00000000    
   0.00000000    
   0.00000000    
   0.00000000    
   0.00000000    
   0.00000000    
   0.00000000    
   0.00000000    
   0.00000000    
   0.00000000    
   0.00000000    
   0.00000000    
   0.00000000    
   0.00000000    
   0.00000000    
   0.00000000    
   0.00000000    
   0.00000000    
   0.00000000    
   0.00000000    
   0.00000000    
   0.00000000    
   0.00000000    
   0.00000000    
   0.00000000    
   0.00000000    
   0.00000000    
   0.00000000    
   0.00000000    
   0.00000000    
   0.00000000    
   0.00000000    
   0.00000000    
   0.00000000    
   0.00000000    
   0.00000000    
   0.00000000    
   0.00000000    
   0.00000000    
   0.00000000    
   0.00000000    
   0.00000000    
   0.00000000    
   0.00000000    
   0.00000000    
   0.00000000    
   0.00000000    
   0.00000000    
   0.00000000    
   0.00000000    
   0.00000000    
   0.00000000    
   0.00000000    
   0.00000000    
   0.00000000    
   0.00000000    
   0.00000000    
   0.00000000    
   0.00000000    
   0.00000000    
   0.00000000    
   0.00000000    
   0.00000000    
   0.00000000    
   0.00000000    
   0.00000000    
   0.00000000    
   0.00000000    
   0.00000000    
   0.00000000    
   0.00000000    
   0.00000000    
   0.00000000    
   0.00000000    
   0.00000000    
   0.00000000    
   0.00000000    
   0.00000000    
   0.00000000    
   0.00000000    
   0.00000000    
   0.00000000    
   0.00000000    
   0.00000000    
   0.00000000    
   0.00000000    
   0.00000000    
   0.00000000    
   0.00000000    
   0.00000000    
   0.00000000    
   0.00000000    
   0.00000000    
   0.00000000    
   0.00000000    
   0.00000000    
   0.00000000    
   0.00000000    
   0.00000000    
   0.00000000    
   0.00000000    
   0.00000000    
   0.00000000    
   0.00000000    
   0.00000000    
   0.00000000    
   0.00000000    
   0.00000000    
   0.00000000    
   0.00000000    
   0.00000000    
   0.00000000    
   0.00000000    
   0.00000000    
   0.00000000    
   0.00000000    
   0.00000000    
   0.00000000    
   0.00000000    
   0.00000000    
   0.00000000    
   0.00000000    
   0.00000000    
   0.00000000    
   0.00000000    
   0.00000000    
   0.00000000    
   0.00000000    
   0.00000000    
   0.00000000    
   0.00000000    
   0.00000000    
   0.00000000    
   0.00000000    
   0.00000000    
   0.00000000    
   0.00000000    
   0.00000000    
   0.00000000    
   0.00000000    
   0.00000000    
   0.00000000    
   0.00000000    
   0.00000000    
   0.00000000    
   0.00000000    
   0.00000000    
   0.00000000    
   0.00000000    
   0.00000000    
   0.00000000    
   0.00000000    
   0.00000000    
   0.00000000    
   0.00000000    
   0.00000000    
   0.00000000    
   0.00000000    
   0.00000000    
   0.00000000    
   0.00000000    
   0.00000000    
   0.00000000    
   0.00000000    
   0.00000000    
   0.00000000    
   0.00000000    
   0.00000000    
   0.00000000    
   0.00000000    
   0.00000000    
   0.00000000    
   0.00000000    
   0.00000000    
   0.00000000    
   0.00000000    
   0.00000000    
   0.00000000    
   0.00000000    
   0.00000000    
   0.00000000    
   0.00000000    
   0.00000000    
   0.00000000    
   0.00000000    
   0.00000000    
   0.00000000    
   0.00000000    
   0.00000000    
   0.00000000    
   0.00000000    
   0.00000000    
   0.00000000    
   0.00000000    
   0.00000000    
   0.00000000    
   0.00000000    
   0.00000000    
   0.00000000    
   0.00000000    
   0.00000000    
   0.00000000    
   0.00000000    
   0.00000000    
   0.00000000    
   0.00000000    
   0.00000000    
   0.00000000    
   0.00000000    
   0.00000000    
   0.00000000    
   0.00000000    
   0.00000000    
   0.00000000    
   0.00000000    
   0.00000000    
   0.00000000    
   0.00000000    
   0.00000000    
   0.00000000    
   0.00000000    
   0.00000000    
   0.00000000    
   0.00000000    
   0.00000000    
   0.00000000    
   0.00000000    
   0.00000000    
   0.00000000    
   0.00000000    
   0.00000000    
   0.00000000    
   0.00000000    
   0.00000000    
   0.00000000    
   0.00000000    
   0.00000000    
   0.00000000    
   0.00000000    
   0.00000000    
   0.00000000    
   0.00000000    
   0.00000000    
   0.00000000    
   0.00000000    
   0.00000000    
   0.00000000    
   0.00000000    
   0.00000000    
   0.00000000    
   0.00000000    
   0.00000000    
   0.00000000    
   0.00000000    
   0.00000000    
   0.00000000    
   0.00000000    
   0.00000000    
   0.00000000    
   0.00000000    
   0.00000000    
   0.00000000    
   0.00000000    
   0.00000000    
   0.00000000    
   0.00000000    
   0.00000000    
   0.00000000    
   0.00000000    
   0.00000000    
   0.00000000    
   0.00000000    
   0.00000000    
   0.00000000    
   0.00000000    
   0.00000000    
   0.00000000    
   0.00000000    
   0.00000000    
   0.00000000    
   0.00000000    
   0.00000000    
   0.00000000    
   0.00000000    
   0.00000000    
   0.00000000    
   0.00000000    
   0.00000000    
   0.00000000    
   0.00000000    
   0.00000000    
   0.00000000    
   0.00000000    
   0.00000000    
   0.00000000    
   0.00000000    
   0.00000000    
   0.00000000    
   0.00000000    
   0.00000000    
   0.00000000    
   0.00000000    
   0.00000000    
   0.00000000    
   0.00000000    
   0.00000000    
   0.00000000    
   0.00000000    
   0.00000000    
   0.00000000    
   0.00000000    
   0.00000000    
   0.00000000    
   0.00000000    
   0.00000000    
   0.00000000    
   0.00000000    
   0.00000000    
   0.00000000    
   0.00000000    
   0.00000000    
   0.00000000    
   0.00000000    
   0.00000000    
   0.00000000    
   0.00000000    
   0.00000000    
   0.00000000    
   0.00000000    
   0.00000000    
   0.00000000    
   0.00000000    
   0.00000000    
   2.00000000    
   0.00000000    
   0.00000000    
   0.00000000    
   1.00000000    
   0.00000000    
   0.00000000    
   0.00000000    
   0.00000000    
   0.00000000    
   0.00000000    
   0.00000000    
   0.00000000    
   0.00000000    
   0.00000000    
   0.00000000    
   0.00000000    
   0.00000000    
   0.00000000    
   0.00000000    
   0.00000000    
   0.00000000    
   0.00000000    
   0.00000000    
   0.00000000    
   0.00000000    
   0.00000000    
   0.00000000    
   0.00000000    
   0.00000000    
   0.00000000    
   0.00000000    
   0.00000000    
   0.00000000    
   0.00000000    
   0.00000000    
   0.00000000    
   0.00000000    
   0.00000000    
   0.00000000    
   0.00000000    
   0.00000000    
   0.00000000    
   0.00000000    
   0.00000000    
   0.00000000    
   0.00000000    
   0.00000000    
   0.00000000    
   0.00000000    
   0.00000000    
   0.00000000    
   0.00000000    
   0.00000000    
   0.00000000    
   0.00000000    
   0.00000000    
   0.00000000    
   0.00000000    
   0.00000000    
   0.00000000    
   0.00000000    
   0.00000000    
   0.00000000    
   0.00000000    
   0.00000000    
   0.00000000    
   0.00000000    
   1.00000000    
   0.00000000    
   0.00000000    
   0.00000000    
   0.00000000    
   0.00000000    
   0.00000000    
   0.00000000    
   0.00000000    
   0.00000000    
   0.00000000    
   0.00000000    
   0.00000000    
   0.00000000    
   0.00000000    
   0.00000000    
   0.00000000    
   0.00000000    
   0.00000000    
   0.00000000    
   0.00000000    
   0.00000000    
   0.00000000    
   0.00000000    
   0.00000000    
   0.00000000    
   0.00000000    
   0.00000000    
   0.00000000    
   0.00000000    
   0.00000000    
   0.00000000    
   0.00000000    
   0.00000000    
   0.00000000    
   0.00000000    
   0.00000000    
   0.00000000    
   0.00000000    
   0.00000000    
   0.00000000    
   0.00000000    
   0.00000000    
   0.00000000    
   0.00000000    
   0.00000000    
   0.00000000    
   0.00000000    
   0.00000000    
   0.00000000    
   0.00000000    
   0.00000000    
   0.00000000    
   0.00000000    
   0.00000000    
   2.00000000    
   0.00000000    
   0.00000000    
   1.00000000    
   0.00000000    
   0.00000000    
   0.00000000    
   0.00000000    
   0.00000000    
   0.00000000    
   0.00000000    
   0.00000000    
   0.00000000    
   0.00000000    
   0.00000000    
   0.00000000    
   0.00000000    
   0.00000000    
   0.00000000    
   0.00000000    
   0.00000000    
   0.00000000    
   0.00000000    
   0.00000000    
   0.00000000    
   0.00000000    
   0.00000000    
   0.00000000    
   0.00000000    
   0.00000000    
   0.00000000    
   0.00000000    
   0.00000000    
   0.00000000    
   0.00000000    
   0.00000000    
   0.00000000    
   0.00000000    
   0.00000000    
   0.00000000    
   0.00000000    
   0.00000000    
   0.00000000    
   0.00000000    
   0.00000000    
   0.00000000    
   0.00000000    
   0.00000000    
   0.00000000    
   0.00000000    
   0.00000000    
   0.00000000    
   0.00000000    
   0.00000000    
   0.00000000    
   0.00000000    
   0.00000000    
   0.00000000    
   0.00000000    
   0.00000000    
   0.00000000    
   0.00000000    
   0.00000000    
   0.00000000    
   0.00000000    
   0.00000000    
   0.00000000    
   0.00000000    
   0.00000000    
   0.00000000    
   0.00000000    
   0.00000000    
   0.00000000    
   1.00000000    
   1.00000000    
   0.00000000    
   0.00000000    
   0.00000000    
   1.00000000    
   0.00000000    
   0.00000000    
   0.00000000    
   0.00000000    
   0.00000000    
   0.00000000    
   0.00000000    
   0.00000000    
   0.00000000    
   0.00000000    
   0.00000000    
   0.00000000    
   0.00000000    
   0.00000000    
   0.00000000    
   0.00000000    
   0.00000000    
   0.00000000    
   0.00000000    
   0.00000000    
   0.00000000    
   0.00000000    
   0.00000000    
   0.00000000    
   0.00000000    
   0.00000000    
   0.00000000    
   0.00000000    
   0.00000000    
   0.00000000    
   0.00000000    
   0.00000000    
   0.00000000    
   0.00000000    
   0.00000000    
   0.00000000    
   0.00000000    
   0.00000000    
   0.00000000    
   0.00000000    
   0.00000000    
   0.00000000    
   0.00000000    
   0.00000000    
   0.00000000    
   0.00000000    
   0.00000000    
   0.00000000    
   0.00000000    
   0.00000000    
   1.00000000    
   0.00000000    
   1.00000000    
   0.00000000    
   0.00000000    
   1.00000000    
   0.00000000    
   0.00000000    
   0.00000000    
   0.00000000    
   0.00000000    
   0.00000000    
   0.00000000    
   0.00000000    
   0.00000000    
   0.00000000    
   0.00000000    
   0.00000000    
   0.00000000    
   0.00000000    
   0.00000000    
   0.00000000    
   0.00000000    
   0.00000000    
   0.00000000    
   0.00000000    
   0.00000000    
   0.00000000    
   0.00000000    
   0.00000000    
   0.00000000    
   0.00000000    
   0.00000000    
   0.00000000    
   0.00000000    
   0.00000000    
   0.00000000    
   0.00000000    
   0.00000000    
   0.00000000    
   0.00000000    
   0.00000000    
   0.00000000    
   0.00000000    
   0.00000000    
   0.00000000    
   0.00000000    
   0.00000000    
   0.00000000    
   0.00000000    
   0.00000000    
   0.00000000    
   0.00000000    
   0.00000000    
   0.00000000    
   0.00000000    
   0.00000000    
   0.00000000    
   0.00000000    
   0.00000000    
   0.00000000    
   0.00000000    
   0.00000000    
   0.00000000    
   0.00000000    
   0.00000000    
   0.00000000    
   0.00000000    
   0.00000000    
   1.00000000    
   0.00000000    
   0.00000000    
   0.00000000    
   0.00000000    
   0.00000000    
   0.00000000    
   0.00000000    
   0.00000000    
   0.00000000    
   0.00000000    
   0.00000000    
   0.00000000    
   0.00000000    
   0.00000000    
   0.00000000    
   0.00000000    
   0.00000000    
   0.00000000    
   0.00000000    
   0.00000000    
   0.00000000    
   0.00000000    
   0.00000000    
   0.00000000    
   0.00000000    
   0.00000000    
   0.00000000    
   0.00000000    
   0.00000000    
   0.00000000    
   0.00000000    
   0.00000000    
   0.00000000    
   0.00000000    
   0.00000000    
   0.00000000    
   0.00000000    
   0.00000000    
   0.00000000    
   0.00000000    
   0.00000000    
   0.00000000    
   0.00000000    
   0.00000000    
   0.00000000    
   0.00000000    
   0.00000000    
   0.00000000    
   0.00000000    
   0.00000000    
   0.00000000    
   0.00000000    
   0.00000000    
   0.00000000    
   0.00000000    
   0.00000000    
   0.00000000    
   0.00000000    
   0.00000000    
   0.00000000    
   1.00000000    
   1.00000000    
   0.00000000    
   1.00000000    
   1.00000000    
   0.00000000    
   0.00000000    
   0.00000000    
   1.00000000    
   0.00000000    
   0.00000000    
   0.00000000    
   0.00000000    
   0.00000000    
   0.00000000    
   0.00000000    
   0.00000000    
   0.00000000    
   0.00000000    
   0.00000000    
   0.00000000    
   0.00000000    
   0.00000000    
   0.00000000    
   0.00000000    
   0.00000000    
   0.00000000    
   0.00000000    
   0.00000000    
   0.00000000    
   0.00000000    
   0.00000000    
   0.00000000    
   0.00000000    
   0.00000000    
   0.00000000    
   0.00000000    
   0.00000000    
   0.00000000    
   0.00000000    
   0.00000000    
   0.00000000    
   0.00000000    
   0.00000000    
   0.00000000    
   0.00000000    
   0.00000000    
   0.00000000    
   0.00000000    
   0.00000000    
   0.00000000    
   0.00000000    
   0.00000000    
   0.00000000    
   0.00000000    
   0.00000000    
   0.00000000    
   0.00000000    
   0.00000000    
   0.00000000    
   0.00000000    
   0.00000000    
   0.00000000    
   0.00000000    
   0.00000000    
   0.00000000    
   0.00000000    
   1.00000000    
   0.00000000    
   0.00000000    
   0.00000000    
   0.00000000    
   0.00000000    
   1.00000000    
   0.00000000    
   0.00000000    
   1.00000000    
   1.00000000    
   0.00000000    
   0.00000000    
   0.00000000    
   0.00000000    
   0.00000000    
   0.00000000    
   0.00000000    
   0.00000000    
   0.00000000    
   0.00000000    
   0.00000000    
   0.00000000    
   0.00000000    
   0.00000000    
   0.00000000    
   0.00000000    
   0.00000000    
   0.00000000    
   0.00000000    
   0.00000000    
   0.00000000    
   0.00000000    
   0.00000000    
   0.00000000    
   0.00000000    
   0.00000000    
   0.00000000    
   0.00000000    
   0.00000000    
   0.00000000    
   0.00000000    
   0.00000000    
   0.00000000    
   0.00000000    
   0.00000000    
   0.00000000    
   0.00000000    
   0.00000000    
   0.00000000    
   0.00000000    
   0.00000000    
   0.00000000    
   0.00000000    
   0.00000000    
   0.00000000    
   0.00000000    
   1.00000000    
   1.00000000    
   0.00000000    
   0.00000000    
   0.00000000    
   0.00000000    
   0.00000000    
   1.00000000    
   0.00000000    
   0.00000000    
   1.00000000    
   0.00000000    
   1.00000000    
   0.00000000    
   0.00000000    
   0.00000000    
   0.00000000    
   0.00000000    
   0.00000000    
   0.00000000    
   0.00000000    
   0.00000000    
   0.00000000    
   0.00000000    
   0.00000000    
   0.00000000    
   0.00000000    
   0.00000000    
   0.00000000    
   0.00000000    
   0.00000000    
   0.00000000    
   0.00000000    
   0.00000000    
   0.00000000    
   0.00000000    
   0.00000000    
   0.00000000    
   0.00000000    
   0.00000000    
   0.00000000    
   0.00000000    
   0.00000000    
   0.00000000    
   0.00000000    
   0.00000000    
   0.00000000    
   0.00000000    
   0.00000000    
   0.00000000    
   0.00000000    
   0.00000000    
   0.00000000    
   0.00000000    
   0.00000000    
   0.00000000    
   0.00000000    
   0.00000000    
   0.00000000    
   0.00000000    
   0.00000000    
   0.00000000    
   1.00000000    
   0.00000000    
   0.00000000    
   1.00000000    
   0.00000000    
   0.00000000    
   0.00000000    
   0.00000000    
   1.00000000    
   1.00000000    
   0.00000000    
   0.00000000    
   1.00000000    
   1.00000000    
   1.00000000    
   0.00000000    
   0.00000000    
   2.00000000    
   0.00000000    
   1.00000000    
   0.00000000    
   0.00000000    
   0.00000000    
   0.00000000    
   0.00000000    
   0.00000000    
   0.00000000    
   0.00000000    
   0.00000000    
   0.00000000    
   0.00000000    
   0.00000000    
   0.00000000    
   0.00000000    
   0.00000000    
   0.00000000    
   0.00000000    
   0.00000000    
   0.00000000    
   0.00000000    
   0.00000000    
   0.00000000    
   0.00000000    
   0.00000000    
   0.00000000    
   0.00000000    
   0.00000000    
   0.00000000    
   0.00000000    
   0.00000000    
   0.00000000    
   0.00000000    
   0.00000000    
   0.00000000    
   0.00000000    
   0.00000000    
   0.00000000    
   0.00000000    
   0.00000000    
   0.00000000    
   1.00000000    
   1.00000000    
   0.00000000    
   0.00000000    
   0.00000000    
   0.00000000    
   0.00000000    
   0.00000000    
   0.00000000    
   0.00000000    
   0.00000000    
   1.00000000    
   0.00000000    
   0.00000000    
   0.00000000    
   0.00000000    
   0.00000000    
   0.00000000    
   0.00000000    
   0.00000000    
   0.00000000    
   0.00000000    
   0.00000000    
   1.00000000    
   0.00000000    
   1.00000000    
   0.00000000    
   0.00000000    
   0.00000000    
   0.00000000    
   0.00000000    
   0.00000000    
   0.00000000    
   0.00000000    
   0.00000000    
   0.00000000    
   0.00000000    
   0.00000000    
   0.00000000    
   0.00000000    
   0.00000000    
   0.00000000    
   0.00000000    
   0.00000000    
   0.00000000    
   0.00000000    
   0.00000000    
   0.00000000    
   0.00000000    
   0.00000000    
   0.00000000    
   0.00000000    
   0.00000000    
   0.00000000    
   0.00000000    
   0.00000000    
   0.00000000    
   0.00000000    
   0.00000000    
   0.00000000    
   0.00000000    
   0.00000000    
   0.00000000    
   0.00000000    
   0.00000000    
   0.00000000    
   1.00000000    
   0.00000000    
   0.00000000    
   0.00000000    
   0.00000000    
   0.00000000    
   0.00000000    
   0.00000000    
   0.00000000    
   0.00000000    
   0.00000000    
   0.00000000    
   0.00000000    
   1.00000000    
   1.00000000    
   1.00000000    
   1.00000000    
   0.00000000    
   0.00000000    
   1.00000000    
   0.00000000    
   0.00000000    
   0.00000000    
   0.00000000    
   0.00000000    
   0.00000000    
   0.00000000    
   0.00000000    
   0.00000000    
   0.00000000    
   0.00000000    
   0.00000000    
   0.00000000    
   0.00000000    
   0.00000000    
   0.00000000    
   0.00000000    
   0.00000000    
   0.00000000    
   0.00000000    
   0.00000000    
   0.00000000    
   0.00000000    
   0.00000000    
   0.00000000    
   0.00000000    
   0.00000000    
   0.00000000    
   0.00000000    
   0.00000000    
   0.00000000    
   0.00000000    
   0.00000000    
   0.00000000    
   0.00000000    
   0.00000000    
   0.00000000    
   0.00000000    
   0.00000000    
   0.00000000    
   0.00000000    
   0.00000000    
   1.00000000    
   0.00000000    
   1.00000000    
   0.00000000    
   0.00000000    
   0.00000000    
   0.00000000    
   1.00000000    
   0.00000000    
   0.00000000    
   0.00000000    
   1.00000000    
   0.00000000    
   0.00000000    
   0.00000000    
   0.00000000    
   1.00000000    
   0.00000000    
   0.00000000    
   0.00000000    
   0.00000000    
   0.00000000    
   0.00000000    
   0.00000000    
   0.00000000    
   2.00000000    
   0.00000000    
   0.00000000    
   0.00000000    
   0.00000000    
   0.00000000    
   0.00000000    
   0.00000000    
   0.00000000    
   0.00000000    
   0.00000000    
   0.00000000    
   0.00000000    
   0.00000000    
   0.00000000    
   0.00000000    
   0.00000000    
   0.00000000    
   0.00000000    
   0.00000000    
   0.00000000    
   0.00000000    
   0.00000000    
   0.00000000    
   0.00000000    
   0.00000000    
   0.00000000    
   0.00000000    
   0.00000000    
   0.00000000    
   0.00000000    
   0.00000000    
   0.00000000    
   0.00000000    
   0.00000000    
   0.00000000    
   0.00000000    
   0.00000000    
   0.00000000    
   0.00000000    
   0.00000000    
   0.00000000    
   0.00000000    
   0.00000000    
   1.00000000    
   0.00000000    
   0.00000000    
   0.00000000    
   1.00000000    
   0.00000000    
   0.00000000    
   0.00000000    
   0.00000000    
   0.00000000    
   0.00000000    
   0.00000000    
   0.00000000    
   0.00000000    
   0.00000000    
   0.00000000    
   0.00000000    
   0.00000000    
   0.00000000    
   0.00000000    
   0.00000000    
   0.00000000    
   0.00000000    
   0.00000000    
   0.00000000    
   0.00000000    
   0.00000000    
   0.00000000    
   0.00000000    
   0.00000000    
   0.00000000    
   0.00000000    
   0.00000000    
   0.00000000    
   0.00000000    
   0.00000000    
   0.00000000    
   0.00000000    
   0.00000000    
   0.00000000    
   0.00000000    
   0.00000000    
   0.00000000    
   0.00000000    
   0.00000000    
   0.00000000    
   0.00000000    
   0.00000000    
   0.00000000    
   0.00000000    
   0.00000000    
   0.00000000    
   0.00000000    
   0.00000000    
   0.00000000    
   0.00000000    
   0.00000000    
   0.00000000    
   0.00000000    
   0.00000000    
   0.00000000    
   0.00000000    
   0.00000000    
   0.00000000    
   1.00000000    
   0.00000000    
   0.00000000    
   0.00000000    
   0.00000000    
   0.00000000    
   0.00000000    
   1.00000000    
   1.00000000    
   1.00000000    
   0.00000000    
   0.00000000    
   0.00000000    
   0.00000000    
   1.00000000    
   0.00000000    
   0.00000000    
   0.00000000    
   1.00000000    
   0.00000000    
   0.00000000    
   0.00000000    
   0.00000000    
   0.00000000    
   0.00000000    
   0.00000000    
   0.00000000    
   0.00000000    
   0.00000000    
   0.00000000    
   0.00000000    
   0.00000000    
   0.00000000    
   0.00000000    
   0.00000000    
   0.00000000    
   0.00000000    
   0.00000000    
   0.00000000    
   0.00000000    
   0.00000000    
   0.00000000    
   0.00000000    
   0.00000000    
   0.00000000    
   0.00000000    
   0.00000000    
   0.00000000    
   0.00000000    
   0.00000000    
   0.00000000    
   0.00000000    
   0.00000000    
   0.00000000    
   0.00000000    
   0.00000000    
   0.00000000    
   0.00000000    
   0.00000000    
   0.00000000    
   1.00000000    
   0.00000000    
   1.00000000    
   0.00000000    
   0.00000000    
   0.00000000    
   0.00000000    
   0.00000000    
   0.00000000    
   0.00000000    
   0.00000000    
   1.00000000    
   1.00000000    
   0.00000000    
   0.00000000    
   0.00000000    
   0.00000000    
   0.00000000    
   1.00000000    
   0.00000000    
   1.00000000    
   0.00000000    
   0.00000000    
   1.00000000    
   0.00000000    
   0.00000000    
   0.00000000    
   0.00000000    
   0.00000000    
   0.00000000    
   0.00000000    
   0.00000000    
   0.00000000    
   0.00000000    
   0.00000000    
   0.00000000    
   0.00000000    
   0.00000000    
   0.00000000    
   0.00000000    
   0.00000000    
   0.00000000    
   0.00000000    
   0.00000000    
   0.00000000    
   0.00000000    
   0.00000000    
   0.00000000    
   0.00000000    
   0.00000000    
   0.00000000    
   0.00000000    
   0.00000000    
   0.00000000    
   0.00000000    
   0.00000000    
   0.00000000    
   0.00000000    
   0.00000000    
   0.00000000    
   0.00000000    
   0.00000000    
   0.00000000    
   0.00000000    
   0.00000000    
   0.00000000    
   0.00000000    
   0.00000000    
   0.00000000    
   0.00000000    
   0.00000000    
   0.00000000    
   0.00000000    
   1.00000000    
   1.00000000    
   0.00000000    
   0.00000000    
   0.00000000    
   1.00000000    
   0.00000000    
   0.00000000    
   0.00000000    
   0.00000000    
   0.00000000    
   0.00000000    
   0.00000000    
   0.00000000    
   0.00000000    
   0.00000000    
   0.00000000    
   0.00000000    
   0.00000000    
   0.00000000    
   0.00000000    
   0.00000000    
   0.00000000    
   0.00000000    
   0.00000000    
   0.00000000    
   0.00000000    
   0.00000000    
   0.00000000    
   0.00000000    
   0.00000000    
   0.00000000    
   0.00000000    
   0.00000000    
   0.00000000    
   0.00000000    
   0.00000000    
   0.00000000    
   0.00000000    
   0.00000000    
   0.00000000    
   0.00000000    
   0.00000000    
   0.00000000    
   0.00000000    
   0.00000000    
   0.00000000    
   0.00000000    
   0.00000000    
   0.00000000    
   0.00000000    
   0.00000000    
   0.00000000    
   0.00000000    
   0.00000000    
   0.00000000    
   0.00000000    
   1.00000000    
   0.00000000    
   1.00000000    
   0.00000000    
   0.00000000    
   0.00000000    
   0.00000000    
   0.00000000    
   1.00000000    
   0.00000000    
   0.00000000    
   0.00000000    
   0.00000000    
   0.00000000    
   0.00000000    
   0.00000000    
   0.00000000    
   0.00000000    
   1.00000000    
   0.00000000    
   0.00000000    
   0.00000000    
   0.00000000    
   0.00000000    
   0.00000000    
   0.00000000    
   0.00000000    
   0.00000000    
   0.00000000    
   0.00000000    
   0.00000000    
   0.00000000    
   0.00000000    
   0.00000000    
   0.00000000    
   0.00000000    
   0.00000000    
   0.00000000    
   0.00000000    
   0.00000000    
   0.00000000    
   0.00000000    
   0.00000000    
   0.00000000    
   0.00000000    
   0.00000000    
   0.00000000    
   0.00000000    
   0.00000000    
   0.00000000    
   0.00000000    
   0.00000000    
   0.00000000    
   0.00000000    
   0.00000000    
   0.00000000    
   0.00000000    
   0.00000000    
   0.00000000    
   0.00000000    
   0.00000000    
   0.00000000    
   0.00000000    
   0.00000000    
   1.00000000    
   0.00000000    
   0.00000000    
   0.00000000    
   1.00000000    
   0.00000000    
   0.00000000    
   0.00000000    
   0.00000000    
   0.00000000    
   1.00000000    
   0.00000000    
   1.00000000    
   0.00000000    
   2.00000000    
   0.00000000    
   0.00000000    
   0.00000000    
   1.00000000    
   0.00000000    
   0.00000000    
   2.00000000    
   0.00000000    
   0.00000000    
   0.00000000    
   0.00000000    
   0.00000000    
   0.00000000    
   0.00000000    
   0.00000000    
   0.00000000    
   0.00000000    
   0.00000000    
   0.00000000    
   0.00000000    
   0.00000000    
   0.00000000    
   0.00000000    
   0.00000000    
   0.00000000    
   0.00000000    
   0.00000000    
   0.00000000    
   0.00000000    
   0.00000000    
   0.00000000    
   0.00000000    
   0.00000000    
   0.00000000    
   0.00000000    
   0.00000000    
   0.00000000    
   0.00000000    
   0.00000000    
   0.00000000    
   0.00000000    
   0.00000000    
   0.00000000    
   0.00000000    
   0.00000000    
   0.00000000    
   0.00000000    
   0.00000000    
   0.00000000    
   0.00000000    
   1.00000000    
   1.00000000    
   0.00000000    
   3.00000000    
   1.00000000    
   0.00000000    
   0.00000000    
   1.00000000    
   0.00000000    
   0.00000000    
   0.00000000    
   0.00000000    
   0.00000000    
   0.00000000    
   1.00000000    
   0.00000000    
   0.00000000    
   0.00000000    
   0.00000000    
   0.00000000    
   0.00000000    
   0.00000000    
   0.00000000    
   0.00000000    
   0.00000000    
   0.00000000    
   0.00000000    
   0.00000000    
   0.00000000    
   0.00000000    
   0.00000000    
   0.00000000    
   0.00000000    
   0.00000000    
   0.00000000    
   0.00000000    
   0.00000000    
   0.00000000    
   0.00000000    
   0.00000000    
   0.00000000    
   0.00000000    
   0.00000000    
   0.00000000    
   0.00000000    
   0.00000000    
   0.00000000    
   0.00000000    
   0.00000000    
   0.00000000    
   0.00000000    
   0.00000000    
   0.00000000    
   0.00000000    
   0.00000000    
   0.00000000    
   0.00000000    
   0.00000000    
   0.00000000    
   0.00000000    
   0.00000000    
   0.00000000    
   0.00000000    
   0.00000000    
   0.00000000    
   0.00000000    
   0.00000000    
   0.00000000    
   0.00000000    
   0.00000000    
   1.00000000    
   0.00000000    
   0.00000000    
   0.00000000    
   0.00000000    
   1.00000000    
   1.00000000    
   0.00000000    
   0.00000000    
   0.00000000    
   0.00000000    
   0.00000000    
   0.00000000    
   1.00000000    
   1.00000000    
   0.00000000    
   0.00000000    
   0.00000000    
   0.00000000    
   0.00000000    
   0.00000000    
   0.00000000    
   0.00000000    
   0.00000000    
   0.00000000    
   0.00000000    
   0.00000000    
   0.00000000    
   0.00000000    
   0.00000000    
   0.00000000    
   0.00000000    
   0.00000000    
   0.00000000    
   0.00000000    
   0.00000000    
   0.00000000    
   0.00000000    
   0.00000000    
   0.00000000    
   0.00000000    
   0.00000000    
   0.00000000    
   0.00000000    
   0.00000000    
   0.00000000    
   0.00000000    
   0.00000000    
   0.00000000    
   0.00000000    
   0.00000000    
   0.00000000    
   0.00000000    
   0.00000000    
   0.00000000    
   0.00000000    
   1.00000000    
   0.00000000    
   0.00000000    
   0.00000000    
   0.00000000    
   0.00000000    
   0.00000000    
   1.00000000    
   0.00000000    
   1.00000000    
   1.00000000    
   0.00000000    
   0.00000000    
   2.00000000    
   1.00000000    
   1.00000000    
   1.00000000    
   1.00000000    
   1.00000000    
   1.00000000    
   0.00000000    
   1.00000000    
   0.00000000    
   0.00000000    
   0.00000000    
   0.00000000    
   0.00000000    
   0.00000000    
   0.00000000    
   0.00000000    
   0.00000000    
   0.00000000    
   0.00000000    
   0.00000000    
   0.00000000    
   0.00000000    
   0.00000000    
   0.00000000    
   0.00000000    
   0.00000000    
   0.00000000    
   0.00000000    
   0.00000000    
   0.00000000    
   0.00000000    
   0.00000000    
   0.00000000    
   0.00000000    
   0.00000000    
   0.00000000    
   0.00000000    
   0.00000000    
   0.00000000    
   0.00000000    
   0.00000000    
   0.00000000    
   0.00000000    
   0.00000000    
   0.00000000    
   0.00000000    
   0.00000000    
   0.00000000    
   0.00000000    
   0.00000000    
   0.00000000    
   0.00000000    
   0.00000000    
   0.00000000    
   0.00000000    
   0.00000000    
   0.00000000    
   0.00000000    
   0.00000000    
   0.00000000    
   0.00000000    
   1.00000000    
   0.00000000    
   0.00000000    
   0.00000000    
   0.00000000    
   0.00000000    
   0.00000000    
   0.00000000    
   1.00000000    
   0.00000000    
   0.00000000    
   0.00000000    
   0.00000000    
   0.00000000    
   0.00000000    
   0.00000000    
   0.00000000    
   0.00000000    
   0.00000000    
   0.00000000    
   0.00000000    
   0.00000000    
   0.00000000    
   0.00000000    
   0.00000000    
   0.00000000    
   0.00000000    
   0.00000000    
   0.00000000    
   0.00000000    
   0.00000000    
   0.00000000    
   0.00000000    
   0.00000000    
   0.00000000    
   0.00000000    
   0.00000000    
   0.00000000    
   0.00000000    
   0.00000000    
   0.00000000    
   0.00000000    
   0.00000000    
   0.00000000    
   0.00000000    
   0.00000000    
   0.00000000    
   0.00000000    
   0.00000000    
   0.00000000    
   0.00000000    
   0.00000000    
   0.00000000    
   0.00000000    
   0.00000000    
   0.00000000    
   0.00000000    
   1.00000000    
   0.00000000    
   0.00000000    
   0.00000000    
   0.00000000    
   0.00000000    
   0.00000000    
   0.00000000    
   0.00000000    
   0.00000000    
   0.00000000    
   0.00000000    
   0.00000000    
   0.00000000    
   0.00000000    
   0.00000000    
   1.00000000    
   0.00000000    
   0.00000000    
   0.00000000    
   0.00000000    
   0.00000000    
   0.00000000    
   0.00000000    
   0.00000000    
   0.00000000    
   0.00000000    
   0.00000000    
   0.00000000    
   0.00000000    
   0.00000000    
   0.00000000    
   0.00000000    
   0.00000000    
   0.00000000    
   0.00000000    
   0.00000000    
   0.00000000    
   0.00000000    
   0.00000000    
   0.00000000    
   0.00000000    
   0.00000000    
   0.00000000    
   0.00000000    
   0.00000000    
   0.00000000    
   0.00000000    
   0.00000000    
   0.00000000    
   0.00000000    
   0.00000000    
   0.00000000    
   0.00000000    
   0.00000000    
   0.00000000    
   0.00000000    
   0.00000000    
   0.00000000    
   0.00000000    
   0.00000000    
   0.00000000    
   0.00000000    
   0.00000000    
   0.00000000    
   0.00000000    
   0.00000000    
   0.00000000    
   1.00000000    
   0.00000000    
   0.00000000    
   0.00000000    
   0.00000000    
   1.00000000    
   0.00000000    
   0.00000000    
   0.00000000    
   0.00000000    
   0.00000000    
   0.00000000    
   0.00000000    
   0.00000000    
   0.00000000    
   0.00000000    
   0.00000000    
   0.00000000    
   0.00000000    
   0.00000000    
   0.00000000    
   0.00000000    
   0.00000000    
   0.00000000    
   0.00000000    
   0.00000000    
   0.00000000    
   0.00000000    
   0.00000000    
   0.00000000    
   0.00000000    
   0.00000000    
   0.00000000    
   0.00000000    
   0.00000000    
   0.00000000    
   0.00000000    
   0.00000000    
   0.00000000    
   0.00000000    
   0.00000000    
   0.00000000    
   0.00000000    
   0.00000000    
   0.00000000    
   0.00000000    
   0.00000000    
   0.00000000    
   0.00000000    
   0.00000000    
   0.00000000    
   0.00000000    
   0.00000000    
   0.00000000    
   0.00000000    
   0.00000000    
   0.00000000    
   0.00000000    
   0.00000000    
   0.00000000    
   0.00000000    
   0.00000000    
   1.00000000    
   1.00000000    
   0.00000000    
   0.00000000    
   1.00000000    
   0.00000000    
   0.00000000    
   0.00000000    
   0.00000000    
   0.00000000    
   0.00000000    
   0.00000000    
   0.00000000    
   0.00000000    
   0.00000000    
   0.00000000    
   0.00000000    
   0.00000000    
   0.00000000    
   0.00000000    
   0.00000000    
   0.00000000    
   0.00000000    
   0.00000000    
   0.00000000    
   0.00000000    
   0.00000000    
   0.00000000    
   0.00000000    
   0.00000000    
   0.00000000    
   0.00000000    
   0.00000000    
   0.00000000    
   0.00000000    
   0.00000000    
   0.00000000    
   0.00000000    
   0.00000000    
   0.00000000    
   0.00000000    
   0.00000000    
   0.00000000    
   0.00000000    
   0.00000000    
   0.00000000    
   0.00000000    
   0.00000000    
   0.00000000    
   0.00000000    
   0.00000000    
   0.00000000    
   0.00000000    
   0.00000000    
   0.00000000    
   0.00000000    
   0.00000000    
   0.00000000    
   0.00000000    
   0.00000000    
   0.00000000    
   0.00000000    
   0.00000000    
   0.00000000    
   0.00000000    
   0.00000000    
   0.00000000    
   0.00000000    
   0.00000000    
   1.00000000    
   0.00000000    
   0.00000000    
   0.00000000    
   0.00000000    
   0.00000000    
   0.00000000    
   0.00000000    
   0.00000000    
   0.00000000    
   0.00000000    
   0.00000000    
   0.00000000    
   0.00000000    
   0.00000000    
   0.00000000    
   0.00000000    
   0.00000000    
   0.00000000    
   0.00000000    
   0.00000000    
   0.00000000    
   0.00000000    
   0.00000000    
   0.00000000    
   0.00000000    
   0.00000000    
   0.00000000    
   0.00000000    
   0.00000000    
   0.00000000    
   0.00000000    
   0.00000000    
   0.00000000    
   0.00000000    
   0.00000000    
   0.00000000    
   0.00000000    
   0.00000000    
   0.00000000    
   0.00000000    
   0.00000000    
   0.00000000    
   0.00000000    
   0.00000000    
   0.00000000    
   0.00000000    
   0.00000000    
   0.00000000    
   0.00000000    
   0.00000000    
   0.00000000    
   0.00000000    
   0.00000000    
   0.00000000    
   0.00000000    
   0.00000000    
   0.00000000    
   0.00000000    
   0.00000000    
   0.00000000    
   0.00000000    
   0.00000000    
   0.00000000    
   0.00000000    
   0.00000000    
   0.00000000    
   0.00000000    
   0.00000000    
   0.00000000    
   0.00000000    
   0.00000000    
   0.00000000    
   0.00000000    
   0.00000000    
   0.00000000    
   0.00000000    
   0.00000000    
   0.00000000    
   0.00000000    
   0.00000000    
   0.00000000    
   0.00000000    
   0.00000000    
   0.00000000    
   0.00000000    
   0.00000000    
   0.00000000    
   0.00000000    
   0.00000000    
   0.00000000    
   0.00000000    
   0.00000000    
   0.00000000    
   0.00000000    
   0.00000000    
   0.00000000    
   0.00000000    
   0.00000000    
   0.00000000    
   0.00000000    
   0.00000000    
   0.00000000    
   0.00000000    
   0.00000000    
   0.00000000    
   0.00000000    
   0.00000000    
   0.00000000    
   0.00000000    
   0.00000000    
   0.00000000    
   0.00000000    
   0.00000000    
   0.00000000    
   0.00000000    
   0.00000000    
   0.00000000    
   0.00000000    
   0.00000000    
   0.00000000    
   0.00000000    
   0.00000000    
   0.00000000    
   0.00000000    
   0.00000000    
   0.00000000    
   0.00000000    
   0.00000000    
   0.00000000    
   0.00000000    
   0.00000000    
   0.00000000    
   0.00000000    
   0.00000000    
   0.00000000    
   0.00000000    
   0.00000000    
   0.00000000    
   0.00000000    
   0.00000000    
   0.00000000    
   0.00000000    
   0.00000000    
   0.00000000    
   0.00000000    
   0.00000000    
   0.00000000    
   0.00000000    
   0.00000000    
   0.00000000    
   0.00000000    
   0.00000000    
   0.00000000    
   0.00000000    
   0.00000000    
   0.00000000    
   0.00000000    
   0.00000000    
   0.00000000    
   0.00000000    
   0.00000000    
   0.00000000    
   0.00000000    
   0.00000000    
   0.00000000    
   0.00000000    
   0.00000000    
   0.00000000    
   0.00000000    
   0.00000000    
   0.00000000    
   0.00000000    
   0.00000000    
   0.00000000    
   0.00000000    
   0.00000000    
   0.00000000    
   0.00000000    
   0.00000000    
   0.00000000    
   0.00000000    
   0.00000000    
   0.00000000    
   0.00000000    
   0.00000000    
   0.00000000    
   0.00000000    
   0.00000000    
   0.00000000    
   0.00000000    
   0.00000000    
   0.00000000    
   0.00000000    
   0.00000000    
   0.00000000    
   0.00000000    
   0.00000000    
   0.00000000    
   0.00000000    
   0.00000000    
   0.00000000    
   0.00000000    
   0.00000000    
   0.00000000    
   0.00000000    
   0.00000000    
   0.00000000    
   0.00000000    
   0.00000000    
   0.00000000    
   0.00000000    
   0.00000000    
   0.00000000    
   0.00000000    
   0.00000000    
   0.00000000    
   0.00000000    
   0.00000000    
   0.00000000    
   0.00000000    
   0.00000000    
   0.00000000    
   0.00000000    
   0.00000000    
   0.00000000    
   0.00000000    
   0.00000000    
   0.00000000    
   0.00000000    
   0.00000000    
   0.00000000    
   0.00000000    
   0.00000000    
   0.00000000    
   0.00000000    
   0.00000000    
   0.00000000    
   0.00000000    
   0.00000000    
   0.00000000    
   0.00000000    
   0.00000000    
   0.00000000    
   0.00000000    
   0.00000000    
   0.00000000    
   0.00000000    
   0.00000000    
   0.00000000    
   0.00000000    
   0.00000000    
   0.00000000    
   0.00000000    
   0.00000000    
   0.00000000    
   0.00000000    
   0.00000000    
   0.00000000    
   0.00000000    
   0.00000000    
   0.00000000    
   0.00000000    
   0.00000000    
   0.00000000    
   0.00000000    
   0.00000000    
   0.00000000    
   0.00000000    
   0.00000000    
   0.00000000    
   0.00000000    
   0.00000000    
   0.00000000    
   0.00000000    
   0.00000000    
   0.00000000    
   0.00000000    
   0.00000000    
   0.00000000    
   0.00000000    
   0.00000000    
   0.00000000    
   0.00000000    
   0.00000000    
   0.00000000    
   0.00000000    
   0.00000000    
   0.00000000    
   0.00000000    
   0.00000000    
   0.00000000    
   0.00000000    
   0.00000000    
   0.00000000    
   0.00000000    
   0.00000000    
   0.00000000    
   0.00000000    
   0.00000000    
   0.00000000    
   0.00000000    
   0.00000000    
   0.00000000    
   0.00000000    
   0.00000000    
   0.00000000    
   0.00000000    
   0.00000000    
   0.00000000    
   0.00000000    
   0.00000000    
   0.00000000    
   0.00000000    
   0.00000000    
   0.00000000    
   0.00000000    
   0.00000000    
   0.00000000    
   0.00000000    
   0.00000000    
   0.00000000    
   0.00000000    
   0.00000000    
   0.00000000    
   0.00000000    
   0.00000000    
   0.00000000    
   0.00000000    
   0.00000000    
   0.00000000    
   0.00000000    
   0.00000000    
   0.00000000    
   0.00000000    
   0.00000000    
   0.00000000    
   0.00000000    
   0.00000000    
   0.00000000    
   0.00000000    
   0.00000000    
   0.00000000    
   0.00000000    
   0.00000000    
   0.00000000    
   0.00000000    
   0.00000000    
   0.00000000    
   0.00000000    
   0.00000000    
   0.00000000    
   0.00000000    
   0.00000000    
   0.00000000    
   0.00000000    
   0.00000000    
   0.00000000    
   0.00000000    
   0.00000000    
   0.00000000    
   0.00000000    
   0.00000000    
   0.00000000    
   0.00000000    
   0.00000000    
   0.00000000    
   0.00000000    
   0.00000000    
   0.00000000    
   0.00000000    
   0.00000000    
   0.00000000    
   0.00000000    
   0.00000000    
   0.00000000    
   0.00000000    
   0.00000000    
   0.00000000    
   0.00000000    
   0.00000000    
   0.00000000    
   0.00000000    
   0.00000000    
   0.00000000    
   0.00000000    
   0.00000000    
   0.00000000    
   0.00000000    
   0.00000000    
   0.00000000    
   0.00000000    
   0.00000000    
   0.00000000    
   0.00000000    
   0.00000000    
   0.00000000    
   0.00000000    
   0.00000000    
   0.00000000    
   0.00000000    
   0.00000000    
   0.00000000    
   0.00000000    
   0.00000000    
   0.00000000    
   0.00000000    
   0.00000000    
   0.00000000    
   0.00000000    
   0.00000000    
   0.00000000    
   0.00000000    
   0.00000000    
   0.00000000    
   0.00000000    
   0.00000000    
   0.00000000    
   0.00000000    
   0.00000000    
   0.00000000    
   0.00000000    
   0.00000000    
   0.00000000    
   0.00000000    
   0.00000000    
   0.00000000    
   0.00000000    
   0.00000000    
   0.00000000    
   0.00000000    
   0.00000000    
   0.00000000    
   0.00000000    
   0.00000000    
   0.00000000    
   0.00000000    
   0.00000000    
   0.00000000    
   0.00000000    
   0.00000000    
   0.00000000    
   0.00000000    
   0.00000000    
   0.00000000    
   0.00000000    
   0.00000000    
   0.00000000    
   0.00000000    
   0.00000000    
   0.00000000    
   0.00000000    
   0.00000000    
   0.00000000    
   0.00000000    
   0.00000000    
   0.00000000    
   0.00000000    
   0.00000000    
   0.00000000    
   0.00000000    
   0.00000000    
   0.00000000    
   0.00000000    
   0.00000000    
   0.00000000    
   0.00000000    
   0.00000000    
   0.00000000    
   0.00000000    
   0.00000000    
   0.00000000    
   0.00000000    
   0.00000000    
   0.00000000    
   0.00000000    
   0.00000000    
   0.00000000    
   0.00000000    
   0.00000000    
   0.00000000    
   0.00000000    
   0.00000000    
   0.00000000    
   0.00000000    
   0.00000000    
   0.00000000    
   0.00000000    
   0.00000000    
   0.00000000    
   0.00000000    
   0.00000000    
   0.00000000    
   0.00000000    
   0.00000000    
   0.00000000    
   0.00000000    
   0.00000000    
   0.00000000    
   0.00000000    
   0.00000000    
   0.00000000    
   0.00000000    
   0.00000000    
   0.00000000    
   0.00000000    
   0.00000000    
   0.00000000    
   0.00000000    
   0.00000000    
   0.00000000    
   0.00000000    
   0.00000000    
   0.00000000    
   0.00000000    
   0.00000000    
   0.00000000    
   0.00000000    
   0.00000000    
   0.00000000    
   0.00000000    
   0.00000000    
   0.00000000    
   0.00000000    
   0.00000000    
   0.00000000    
   0.00000000    
   0.00000000    
   0.00000000    
   0.00000000    
   0.00000000    
   0.00000000    
   0.00000000    
   0.00000000    
   0.00000000    
   0.00000000    
   0.00000000    
   0.00000000    
   0.00000000    
   0.00000000    
   0.00000000    
   0.00000000    
   0.00000000    
   0.00000000    
   0.00000000    
   0.00000000    
   0.00000000    
   0.00000000    
   0.00000000    
   0.00000000    
   0.00000000    
   0.00000000    
   0.00000000    
   0.00000000    
   0.00000000    
   0.00000000    
   0.00000000    
   0.00000000    
   0.00000000    
   0.00000000    
   0.00000000    
   0.00000000    
   0.00000000    
   0.00000000    
   0.00000000    
   0.00000000    
   0.00000000    
   0.00000000    
   0.00000000    
   0.00000000    
   0.00000000    
   0.00000000    
   0.00000000    
   0.00000000    
   0.00000000    
   0.00000000    
   0.00000000    
   0.00000000    
   0.00000000    
   0.00000000    
   0.00000000    
   0.00000000    
   0.00000000    
   0.00000000    
   0.00000000    
   0.00000000    
   0.00000000    
   0.00000000    
   0.00000000    
   0.00000000    
   0.00000000    
   0.00000000    
   0.00000000    
   0.00000000    
   0.00000000    
   0.00000000    
   0.00000000    
   0.00000000    
   0.00000000    
   0.00000000    
   0.00000000    
   0.00000000    
   0.00000000    
   0.00000000    
   0.00000000    
   0.00000000    
   0.00000000    
   0.00000000    
   0.00000000    
   0.00000000    
   0.00000000    
   0.00000000    
   0.00000000    
   0.00000000    
   0.00000000    
   0.00000000    
   0.00000000    
   0.00000000    
   0.00000000    
   0.00000000    
   0.00000000    
   0.00000000    
   0.00000000    
   0.00000000    
   0.00000000    
   0.00000000    
   0.00000000    
   0.00000000    
   0.00000000    
   0.00000000    
   0.00000000    
   0.00000000    
   0.00000000    
   0.00000000    
   0.00000000    
   0.00000000    
   0.00000000    
   0.00000000    
   0.00000000    
   0.00000000    
   0.00000000    
   0.00000000    
   0.00000000    
   0.00000000    
   0.00000000    
   0.00000000    
   0.00000000    
   0.00000000    
   0.00000000    
   0.00000000    
   0.00000000    
   0.00000000    
   0.00000000    
   0.00000000    
   0.00000000    
   0.00000000    
   0.00000000    
   0.00000000    
   0.00000000    
   0.00000000    
   0.00000000    
   0.00000000    
   0.00000000    
   0.00000000    
   0.00000000    
   0.00000000    
   0.00000000    
   0.00000000    
   0.00000000    
   0.00000000    
   0.00000000    
   0.00000000    
   0.00000000    
   0.00000000    
   0.00000000    
   0.00000000    
   0.00000000    
   0.00000000    
   0.00000000    
   0.00000000    
   0.00000000    
   0.00000000    
   0.00000000    
   0.00000000    
   0.00000000    
   0.00000000    
   0.00000000    
   0.00000000    
   0.00000000    
   0.00000000    
   0.00000000    
   0.00000000    
   0.00000000    
   0.00000000    
   0.00000000    
   0.00000000    
   0.00000000    
   0.00000000    
   0.00000000    
   0.00000000    
   0.00000000    
   0.00000000    
   0.00000000    
   0.00000000    
   0.00000000    
   0.00000000    
   0.00000000    
   0.00000000    
   0.00000000    
   0.00000000    
   0.00000000    
   0.00000000    
   0.00000000    
   0.00000000    
   0.00000000    
   0.00000000    
   0.00000000    
   0.00000000    
   0.00000000    
   0.00000000    
   0.00000000    
   0.00000000    
   0.00000000    
   0.00000000    
   0.00000000    
   0.00000000    
   0.00000000    
   0.00000000    
   0.00000000    
   0.00000000    
   0.00000000    
   0.00000000    
   0.00000000    
   0.00000000    
   0.00000000    
   0.00000000    
   0.00000000    
   0.00000000    
   0.00000000    
   0.00000000    
   0.00000000    
   0.00000000    
   0.00000000    
   0.00000000    
   0.00000000    
   0.00000000    
   0.00000000    
   0.00000000    
   0.00000000    
   0.00000000    
   0.00000000    
   0.00000000    
   0.00000000    
   0.00000000    
   0.00000000    
   0.00000000    
   0.00000000    
   0.00000000    
   0.00000000    
   0.00000000    
   0.00000000    
   0.00000000    
   0.00000000    
   0.00000000    
   0.00000000    
   0.00000000    
   0.00000000    
   0.00000000    
   0.00000000    
   0.00000000    
   0.00000000    
   0.00000000    
   0.00000000    
   0.00000000    
   0.00000000    
   0.00000000    
   0.00000000    
   0.00000000    
   0.00000000    
   0.00000000    
   0.00000000    
   0.00000000    
   0.00000000    
   0.00000000    
   0.00000000    
   0.00000000    
   0.00000000    
   0.00000000    
   0.00000000    
   0.00000000    
   0.00000000    
   0.00000000    
   0.00000000    
   0.00000000    
   0.00000000    
   0.00000000    
   0.00000000    
   0.00000000    
   0.00000000    
   0.00000000    
   0.00000000    
   0.00000000    
   0.00000000    
   0.00000000    
   0.00000000    
   0.00000000    
   0.00000000    
   0.00000000    
   0.00000000    
   0.00000000    
   0.00000000    
   0.00000000    
   0.00000000    
   0.00000000    
   0.00000000    
   0.00000000    
   0.00000000    
   0.00000000    
   0.00000000    
   0.00000000    
   0.00000000    
   0.00000000    
   0.00000000    
   0.00000000    
   0.00000000    
   0.00000000    
   0.00000000    
   0.00000000    
   0.00000000    
   0.00000000    
   0.00000000    
   0.00000000    
   0.00000000    
   0.00000000    
   0.00000000    
   0.00000000    
   0.00000000    
   0.00000000    
   0.00000000    
   0.00000000    
   0.00000000    
   0.00000000    
   0.00000000    
   0.00000000    
   0.00000000    
   0.00000000    
   0.00000000    
   0.00000000    
   0.00000000    
   0.00000000    
   0.00000000    
   0.00000000    
   0.00000000    
   0.00000000    
   0.00000000    
   0.00000000    
   0.00000000    
   0.00000000    
   0.00000000    
   0.00000000    
   0.00000000    
   0.00000000    
   0.00000000    
   0.00000000    
   0.00000000    
   0.00000000    
   0.00000000    
   0.00000000    
   0.00000000    
   0.00000000    
   0.00000000    
   0.00000000    
   0.00000000    
   0.00000000    
   0.00000000    
   0.00000000    
   0.00000000    
   0.00000000    
   0.00000000    
   0.00000000    
   0.00000000    
   0.00000000    
   0.00000000    
   0.00000000    
   0.00000000    
   0.00000000    
   0.00000000    
   0.00000000    
   0.00000000    
   0.00000000    
   0.00000000    
   0.00000000    
   0.00000000    
   0.00000000    
   0.00000000    
   0.00000000    
   0.00000000    
   0.00000000    
   0.00000000    
   0.00000000    
   0.00000000    
   0.00000000    
   0.00000000    
   0.00000000    
   0.00000000    
   0.00000000    
   0.00000000    
   0.00000000    
   0.00000000    
   0.00000000    
   0.00000000    
   0.00000000    
   0.00000000    
   0.00000000    
   0.00000000    
   0.00000000    
   0.00000000    
   0.00000000    
   0.00000000    
   0.00000000    
   0.00000000    
   0.00000000    
   0.00000000    
   0.00000000    
   0.00000000    
   0.00000000    
   0.00000000    
   0.00000000    
   0.00000000    
   0.00000000    
   0.00000000    
   0.00000000    
   0.00000000    
   0.00000000    
   0.00000000    
   0.00000000    
   0.00000000    
   0.00000000    
   0.00000000    
   0.00000000    
   0.00000000    
   0.00000000    
   0.00000000    
   0.00000000    
   0.00000000    
   0.00000000    
   0.00000000    
   0.00000000    
   0.00000000    
   0.00000000    
   0.00000000    
   0.00000000    
   0.00000000    
   0.00000000    
   0.00000000    
   0.00000000    
   0.00000000    
   0.00000000    
   0.00000000    
   0.00000000    
   0.00000000    
   0.00000000    
   0.00000000    
   0.00000000    
   0.00000000    
   0.00000000    
   0.00000000    
   0.00000000    
   0.00000000    
   0.00000000    
   0.00000000    
   0.00000000    
   0.00000000    
   0.00000000    
   0.00000000    
   0.00000000    
   0.00000000    
   0.00000000    
   0.00000000    
   0.00000000    
   0.00000000    
   0.00000000    
   0.00000000    
   0.00000000    
   0.00000000    
   0.00000000    
   0.00000000    
   0.00000000    
   0.00000000    
   0.00000000    
   0.00000000    
   0.00000000    
   0.00000000    
   0.00000000    
   0.00000000    
   0.00000000    
   0.00000000    
   0.00000000    
   0.00000000    
   0.00000000    
   0.00000000    
   0.00000000    
   0.00000000    
   0.00000000    
   0.00000000    
   0.00000000    
   0.00000000    
   0.00000000    
   0.00000000    
   0.00000000    
   0.00000000    
   0.00000000    
   0.00000000    
   0.00000000    
   0.00000000    
   0.00000000    
   0.00000000    
   0.00000000    
   0.00000000    
   0.00000000    
   0.00000000    
   0.00000000    
   0.00000000    
   0.00000000    
   0.00000000    
   0.00000000    
   0.00000000    
   0.00000000    
   0.00000000    
   0.00000000    
   0.00000000    
   0.00000000    
   0.00000000    
   0.00000000    
   0.00000000    
   0.00000000    
   0.00000000    
   0.00000000    
   0.00000000    
   0.00000000    
   0.00000000    
   0.00000000    
   0.00000000    
   0.00000000    
   0.00000000    
   0.00000000    
   0.00000000    
   0.00000000    
   0.00000000    
   0.00000000    
   0.00000000    
   0.00000000    
   0.00000000    
   0.00000000    
   0.00000000    
   0.00000000    
   0.00000000    
   0.00000000    
   0.00000000    
   0.00000000    
   0.00000000    
   0.00000000    
   0.00000000    
   0.00000000    
   0.00000000    
   0.00000000    
   0.00000000    
   0.00000000    
   0.00000000    
   0.00000000    
   0.00000000    
   0.00000000    
   0.00000000    
   0.00000000    
   0.00000000    
   0.00000000    
   0.00000000    
   0.00000000    
   0.00000000    
   0.00000000    
   0.00000000    
   0.00000000    
   0.00000000    
   0.00000000    
   0.00000000    
   0.00000000    
   0.00000000    
   0.00000000    
   0.00000000    
   0.00000000    
   0.00000000    
   0.00000000    
   0.00000000    
   0.00000000    
   0.00000000    
   0.00000000    
   0.00000000    
   0.00000000    
   0.00000000    
   0.00000000    
   0.00000000    
   0.00000000    
   0.00000000    
   0.00000000    
   0.00000000    
   0.00000000    
   0.00000000    
   0.00000000    
   0.00000000    
   0.00000000    
   0.00000000    
   0.00000000    
   0.00000000    
   0.00000000    
   0.00000000    
   0.00000000    
   0.00000000    
   0.00000000    
   0.00000000    
   0.00000000    
   0.00000000    
   0.00000000    
   0.00000000    
   0.00000000    
   0.00000000    
   0.00000000    
   0.00000000    
   0.00000000    
   0.00000000    
   0.00000000    
   0.00000000    
   0.00000000    
   0.00000000    
   0.00000000    
   0.00000000    
   0.00000000    
   0.00000000    
   0.00000000    
   0.00000000    
   0.00000000    
   0.00000000    
   0.00000000    
   0.00000000    
   0.00000000    
   0.00000000    
   0.00000000    
   0.00000000    
   0.00000000    
   0.00000000    
   0.00000000    
   0.00000000    
   0.00000000    
   0.00000000    
   0.00000000    
   0.00000000    
   0.00000000    
   0.00000000    
   0.00000000    
   0.00000000    
   0.00000000    
   0.00000000    
   0.00000000    
   0.00000000    
   0.00000000    
   0.00000000    
   0.00000000    
   0.00000000    
   0.00000000    
   0.00000000    
   0.00000000    
   0.00000000    
   0.00000000    
   0.00000000    
   0.00000000    
   0.00000000    
   0.00000000    
   0.00000000    
   0.00000000    
   0.00000000    
   0.00000000    
   0.00000000    
   0.00000000    
   0.00000000    
   0.00000000    
   0.00000000    
   0.00000000    
   0.00000000    
   0.00000000    
   0.00000000    
   0.00000000    
   0.00000000    
   0.00000000    
   0.00000000    
   0.00000000    
   0.00000000    
   0.00000000    
   0.00000000    
   0.00000000    
   0.00000000    
   0.00000000    
   0.00000000    
   0.00000000    
   0.00000000    
   0.00000000    
   0.00000000    
   0.00000000    
   0.00000000    
   0.00000000    
   0.00000000    
   0.00000000    
   0.00000000    
   0.00000000    
   0.00000000    
   0.00000000    
   0.00000000    
   0.00000000    
   0.00000000    
   0.00000000    
   0.00000000    
   0.00000000    
   0.00000000    
   0.00000000    
   0.00000000    
   0.00000000    
   0.00000000    
   0.00000000    
   0.00000000    
   0.00000000    
   0.00000000    
   0.00000000    
   0.00000000    
   0.00000000    
   0.00000000    
   0.00000000    
   0.00000000    
   0.00000000    
   0.00000000    
   0.00000000    
   0.00000000    
   0.00000000    
   0.00000000    
   0.00000000    
   0.00000000    
   0.00000000    
   0.00000000    
   0.00000000    
   0.00000000    
   0.00000000    
   0.00000000    
   0.00000000    
   0.00000000    
   0.00000000    
   0.00000000    
   0.00000000    
   0.00000000    
   0.00000000    
   0.00000000    
   0.00000000    
   0.00000000    
   0.00000000    
   0.00000000    
   0.00000000    
   0.00000000    
   0.00000000    
   0.00000000    
   0.00000000    
   0.00000000    
   0.00000000    
   0.00000000    
   0.00000000    
   0.00000000    
   0.00000000    
   0.00000000    
   0.00000000    
   0.00000000    
   0.00000000    
   0.00000000    
   0.00000000    
   0.00000000    
   0.00000000    
   0.00000000    
   0.00000000    
   0.00000000    
   0.00000000    
   0.00000000    
   0.00000000    
   0.00000000    
   0.00000000    
   0.00000000    
   0.00000000    
   0.00000000    
   0.00000000    
   0.00000000    
   0.00000000    
   0.00000000    
   0.00000000    
   0.00000000    
   0.00000000    
   0.00000000    
   0.00000000    
   0.00000000    
   0.00000000    
   0.00000000    
   0.00000000    
   0.00000000    
   0.00000000    
   0.00000000    
   0.00000000    
   0.00000000    
   0.00000000    
   0.00000000    
   0.00000000    
   0.00000000    
   0.00000000    
   0.00000000    
   0.00000000    
   0.00000000    
   0.00000000    
   0.00000000    
   0.00000000    
   0.00000000    
   0.00000000    
   0.00000000    
   0.00000000    
   0.00000000    
   0.00000000    
   0.00000000    
   0.00000000    
   0.00000000    
   0.00000000    
   0.00000000    
   0.00000000    
   0.00000000    
   0.00000000    
   0.00000000    
   0.00000000    
   0.00000000    
   0.00000000    
   0.00000000    
   0.00000000    
   0.00000000    
   0.00000000    
   0.00000000    
   0.00000000    
   0.00000000    
   0.00000000    
   0.00000000    
   0.00000000    
   0.00000000    
   0.00000000    
   0.00000000    
   0.00000000    
   0.00000000    
   0.00000000    
   0.00000000    
   0.00000000    
   0.00000000    
   0.00000000    
   0.00000000    
   0.00000000    
   0.00000000    
   0.00000000    
   0.00000000    
   0.00000000    
   0.00000000    
   0.00000000    
   0.00000000    
   0.00000000    
   0.00000000    
   0.00000000    
   0.00000000    
   0.00000000    
   0.00000000    
   0.00000000    
   0.00000000    
   0.00000000    
   0.00000000    
   0.00000000    
   0.00000000    
   0.00000000    
   0.00000000    
   0.00000000    
   0.00000000    
   0.00000000    
   0.00000000    
   0.00000000    
   0.00000000    
   0.00000000    
   0.00000000    
   0.00000000    
   0.00000000    
   0.00000000    
   0.00000000    
   0.00000000    
   0.00000000    
   0.00000000    
   0.00000000    
   0.00000000    
   0.00000000    
   0.00000000    
   0.00000000    
   0.00000000    
   0.00000000    
   0.00000000    
   0.00000000    
   0.00000000    
   0.00000000    
   0.00000000    
   0.00000000    
   0.00000000    
   0.00000000    
   0.00000000    
   0.00000000    
   0.00000000    
   0.00000000    
   0.00000000    
   0.00000000    
   0.00000000    
   0.00000000    
   0.00000000    
   0.00000000    
   0.00000000    
   0.00000000    
   0.00000000    
   0.00000000    
   0.00000000    
   0.00000000    
   0.00000000    
   0.00000000    
   0.00000000    
   0.00000000    
   0.00000000    
   0.00000000    
   0.00000000    
   0.00000000    
   0.00000000    
   0.00000000    
   0.00000000    
   0.00000000    
   0.00000000    
   0.00000000    
   0.00000000    
   0.00000000    
   0.00000000    
   0.00000000    
   0.00000000    
   0.00000000    
   0.00000000    
   0.00000000    
   0.00000000    
   0.00000000    
   0.00000000    
   0.00000000    
   0.00000000    
   0.00000000    
   0.00000000    
   0.00000000    
   0.00000000    
   0.00000000    
   0.00000000    
   0.00000000    
   0.00000000    
   0.00000000    
   0.00000000    
   0.00000000    
   0.00000000    
   0.00000000    
   0.00000000    
   0.00000000    
   0.00000000    
   0.00000000    
   0.00000000    
   0.00000000    
   0.00000000    
   0.00000000    
   0.00000000    
   0.00000000    
   0.00000000    
   0.00000000    
   0.00000000    
   0.00000000    
   0.00000000    
   0.00000000    
   0.00000000    
   0.00000000    
   0.00000000    
   0.00000000    
   0.00000000    
   0.00000000    
   0.00000000    
   0.00000000    
   0.00000000    
   0.00000000    
   0.00000000    
   0.00000000    
   0.00000000    
   0.00000000    
   0.00000000    
   0.00000000    
   0.00000000    
   0.00000000    
   0.00000000    
   0.00000000    
   0.00000000    
   0.00000000    
   0.00000000    
   0.00000000    
   0.00000000    
   0.00000000    
   0.00000000    
   0.00000000    
   0.00000000    
   0.00000000    
   0.00000000    
   0.00000000    
   0.00000000    
   0.00000000    
   0.00000000    
   0.00000000    
   0.00000000    
   0.00000000    
   0.00000000    
   0.00000000    
   0.00000000    
   0.00000000    
   0.00000000    
   0.00000000    
   0.00000000    
   0.00000000    
   0.00000000    
   0.00000000    
   0.00000000    
   0.00000000    
   0.00000000    
   0.00000000    
   0.00000000    
   0.00000000    
   0.00000000    
   0.00000000    
   0.00000000    
   0.00000000    
   0.00000000    
   0.00000000    
   0.00000000    
   0.00000000    
   0.00000000    
   0.00000000    
   0.00000000    
   0.00000000    
   0.00000000    
   0.00000000    
   0.00000000    
   0.00000000    
   0.00000000    
   0.00000000    
   0.00000000    
   0.00000000    
   0.00000000    
   0.00000000    
   0.00000000    
   0.00000000    
   0.00000000    
   0.00000000    
   0.00000000    
   0.00000000    
   0.00000000    
   0.00000000    
   0.00000000    
   0.00000000    
   0.00000000    
   0.00000000    
   0.00000000    
   0.00000000    
   0.00000000    
   0.00000000    
   0.00000000    
   0.00000000    
   0.00000000    
   0.00000000    
   0.00000000    
   0.00000000    
   0.00000000    
   0.00000000    
   0.00000000    
   0.00000000    
   0.00000000    
   0.00000000    
   0.00000000    
   0.00000000    
   0.00000000    
   0.00000000    
   0.00000000    
   0.00000000    
   0.00000000    
   0.00000000    
   0.00000000    
   0.00000000    
   0.00000000    
   0.00000000    
   0.00000000    
   0.00000000    
   0.00000000    
   0.00000000    
   0.00000000    
   0.00000000    
   0.00000000    
   0.00000000    
   0.00000000    
   0.00000000    
   0.00000000    
   0.00000000    
   0.00000000    
   0.00000000    
   0.00000000    
   0.00000000    
   0.00000000    
   0.00000000    
   0.00000000    
   0.00000000    
   0.00000000    
   0.00000000    
   0.00000000    
   0.00000000    
   0.00000000    
   0.00000000    
   0.00000000    
   0.00000000    
   0.00000000    
   0.00000000    
   0.00000000    
   0.00000000    
   0.00000000    
   0.00000000    
   0.00000000    
   0.00000000    
   0.00000000    
   0.00000000    
   0.00000000    
   0.00000000    
   0.00000000    
   0.00000000    
   0.00000000    
   0.00000000    
   0.00000000    
   0.00000000    
   0.00000000    
   0.00000000    
   0.00000000    
   0.00000000    
   0.00000000    
   0.00000000    
   0.00000000    
   0.00000000    
   0.00000000    
   0.00000000    
   0.00000000    
   0.00000000    
   0.00000000    
   0.00000000    
   0.00000000    
   0.00000000    
   0.00000000    
   0.00000000    
   0.00000000    
   0.00000000    
   0.00000000    
   0.00000000    
   0.00000000    
   0.00000000    
   0.00000000    
   0.00000000    
   0.00000000    
   0.00000000    
   0.00000000    
   0.00000000    
   0.00000000    
   0.00000000    
   0.00000000    
   0.00000000    
   0.00000000    
   0.00000000    
   0.00000000    
   0.00000000    
   0.00000000    
   0.00000000    
   0.00000000    
   0.00000000    
   0.00000000    
   0.00000000    
   0.00000000    
   0.00000000    
   0.00000000    
   0.00000000    
   0.00000000    
   0.00000000    
   0.00000000    
   0.00000000    
   0.00000000    
   0.00000000    
   0.00000000    
   0.00000000    
   0.00000000    
   0.00000000    
   0.00000000    
   0.00000000    
   0.00000000    
   0.00000000    
   0.00000000    
   0.00000000    
   0.00000000    
   0.00000000    
   0.00000000    
   0.00000000    
   0.00000000    
   0.00000000    
   0.00000000    
   0.00000000    
   0.00000000    
   0.00000000    
   0.00000000    
   0.00000000    
   0.00000000    
   0.00000000    
   0.00000000    
   0.00000000    
   0.00000000    
   0.00000000    
   0.00000000    
   0.00000000    
   0.00000000    
   0.00000000    
   0.00000000    
   0.00000000    
   0.00000000    
   0.00000000    
   0.00000000    
   0.00000000    
   0.00000000    
   0.00000000    
   0.00000000    
   0.00000000    
   0.00000000    
   0.00000000    
   0.00000000    
   0.00000000    
   0.00000000    
   0.00000000    
   0.00000000    
   0.00000000    
   0.00000000    
   0.00000000    
   0.00000000    
   0.00000000    
   0.00000000    
   0.00000000    
   0.00000000    
   0.00000000    
   0.00000000    
   0.00000000    
   0.00000000    
   0.00000000    
   0.00000000    
   0.00000000    
   0.00000000    
   0.00000000    
   0.00000000    
   0.00000000    
   0.00000000    
   0.00000000    
   0.00000000    
   0.00000000    
   0.00000000    
   0.00000000    
   0.00000000    
   0.00000000    
   0.00000000    
   0.00000000    
   0.00000000    
   0.00000000    
   0.00000000    
   0.00000000    
   0.00000000    
   0.00000000    
   0.00000000    
   0.00000000    
   0.00000000    
   0.00000000    
   0.00000000    
   0.00000000    
   0.00000000    
   0.00000000    
   0.00000000    
   0.00000000    
   0.00000000    
   0.00000000    
   0.00000000    
   0.00000000    
   0.00000000    
   0.00000000    
   0.00000000    
   0.00000000    
   0.00000000    
   0.00000000    
   0.00000000    
   0.00000000    
   0.00000000    
   0.00000000    
   0.00000000    
   0.00000000    
   0.00000000    
   0.00000000    
   0.00000000    
   0.00000000    
   0.00000000    
   0.00000000    
   0.00000000    
   0.00000000    
   0.00000000    
   0.00000000    
   0.00000000    
   0.00000000    
   0.00000000    
   0.00000000    
   0.00000000    
   0.00000000    
   0.00000000    
   0.00000000    
   0.00000000    
   0.00000000    
   0.00000000    
   0.00000000    
   0.00000000    
   0.00000000    
   0.00000000    
   0.00000000    
   0.00000000    
   0.00000000    
   0.00000000    
   0.00000000    
   0.00000000    
   0.00000000    
   0.00000000    
   0.00000000    
   0.00000000    
   0.00000000    
   0.00000000    
   0.00000000    
   0.00000000    
   0.00000000    
   0.00000000    
   0.00000000    
   0.00000000    
   0.00000000    
   0.00000000    
   0.00000000    
   0.00000000    
   0.00000000    
   0.00000000    
   0.00000000    
   0.00000000    
   0.00000000    
   0.00000000    
   0.00000000    
   0.00000000    
   0.00000000    
   0.00000000    
   0.00000000    
   0.00000000    
   0.00000000    
   0.00000000    
   0.00000000    
   0.00000000    
   0.00000000    
   0.00000000    
   0.00000000    
   0.00000000    
   0.00000000    
   0.00000000    
   0.00000000    
   0.00000000    
   0.00000000    
   0.00000000    
   0.00000000    
   0.00000000    
   0.00000000    
   0.00000000    
   0.00000000    
   0.00000000    
   0.00000000    
   0.00000000    
   0.00000000    
   0.00000000    
   0.00000000    
   0.00000000    
   0.00000000    
   0.00000000    
   0.00000000    
   0.00000000    
   0.00000000    
   0.00000000    
   0.00000000    
   0.00000000    
   0.00000000    
   0.00000000    
   0.00000000    
   0.00000000    
   0.00000000    
   0.00000000    
   0.00000000    
   0.00000000    
   0.00000000    
   0.00000000    
   0.00000000    
   0.00000000    
   0.00000000    
   0.00000000    
   0.00000000    
   0.00000000    
   0.00000000    
   0.00000000    
   0.00000000    
   0.00000000    
   0.00000000    
   0.00000000    
   0.00000000    
   0.00000000    
   0.00000000    
   0.00000000    
   0.00000000    
   0.00000000    
   0.00000000    
   0.00000000    
   0.00000000    
   0.00000000    
   0.00000000    
   0.00000000    
   0.00000000    
   0.00000000    
   0.00000000    
   0.00000000    
   0.00000000    
   0.00000000    
   0.00000000    
   0.00000000    
   0.00000000    
   0.00000000    
   0.00000000    
   0.00000000    
   0.00000000    
   0.00000000    
   0.00000000    
   0.00000000    
   0.00000000    
   0.00000000    
   0.00000000    
   0.00000000    
   0.00000000    
   0.00000000    
   0.00000000    
   0.00000000    
   0.00000000    
   0.00000000    
   0.00000000    
   0.00000000    
   0.00000000    
   0.00000000    
   0.00000000    
   0.00000000    
   0.00000000    
   0.00000000    
   0.00000000    
   0.00000000    
   0.00000000    
   0.00000000    
   0.00000000    
   0.00000000    
   0.00000000    
   0.00000000    
   0.00000000    
   0.00000000    
   0.00000000    
   0.00000000    
   0.00000000    
   0.00000000    
   0.00000000    
   0.00000000    
   0.00000000    
   0.00000000    
   0.00000000    
   0.00000000    
   0.00000000    
   0.00000000    
   0.00000000    
   0.00000000    
   0.00000000    
   0.00000000    
   0.00000000    
   0.00000000    
   0.00000000    
   0.00000000    
   0.00000000    
   0.00000000    
   0.00000000    
   0.00000000    
   0.00000000    
   0.00000000    
   0.00000000    
   0.00000000    
   0.00000000    
   0.00000000    
   0.00000000    
   0.00000000    
   0.00000000    
   0.00000000    
   0.00000000    
   0.00000000    
   0.00000000    
   0.00000000    
   0.00000000    
   0.00000000    
   0.00000000    
   0.00000000    
   0.00000000    
   0.00000000    
   0.00000000    
   0.00000000    
   0.00000000    
   0.00000000    
   0.00000000    
   0.00000000    
   0.00000000    
   0.00000000    
   0.00000000    
   0.00000000    
   0.00000000    
   0.00000000    
   0.00000000    
   0.00000000    
   0.00000000    
   0.00000000    
   0.00000000    
   0.00000000    
   0.00000000    
   0.00000000    
   0.00000000    
   0.00000000    
   0.00000000    
   0.00000000    
   0.00000000    
   0.00000000    
   0.00000000    
   0.00000000    
   0.00000000    
   0.00000000    
   0.00000000    
   0.00000000    
   0.00000000    
   0.00000000    
   0.00000000    
   0.00000000    
   0.00000000    
   0.00000000    
   0.00000000    
   0.00000000    
   0.00000000    
   0.00000000    
   0.00000000    
   0.00000000    
   0.00000000    
   0.00000000    
   0.00000000    
   0.00000000    
   0.00000000    
   0.00000000    
   0.00000000    
   0.00000000    
   0.00000000    
   0.00000000    
   0.00000000    
   0.00000000    
   0.00000000    
   0.00000000    
   0.00000000    
   0.00000000    
   0.00000000    
   0.00000000    
   0.00000000    
   0.00000000    
   0.00000000    
   0.00000000    
   0.00000000    
   0.00000000    
   0.00000000    
   0.00000000    
   0.00000000    
   0.00000000    
   0.00000000    
   0.00000000    
   0.00000000    
   0.00000000    
   0.00000000    
   0.00000000    
   0.00000000    
   0.00000000    
   0.00000000    
   0.00000000    
   0.00000000    
   0.00000000    
   0.00000000    
   0.00000000    
   0.00000000    
   0.00000000    
   0.00000000    
   0.00000000    
   0.00000000    
   0.00000000    
   0.00000000    
   0.00000000    
   0.00000000    
   0.00000000    
   0.00000000    
   0.00000000    
   0.00000000    
   0.00000000    
   0.00000000    
   0.00000000    
   0.00000000    
   0.00000000    
   0.00000000    
   0.00000000    
   0.00000000    
   0.00000000    
   0.00000000    
   0.00000000    
   0.00000000    
   0.00000000    
   0.00000000    
   0.00000000    
   0.00000000    
   0.00000000    
   0.00000000    
   0.00000000    
   0.00000000    
   0.00000000    
   0.00000000    
   0.00000000    
   0.00000000    
   0.00000000    
   0.00000000    
   0.00000000    
   0.00000000    
   0.00000000    
   0.00000000    
   0.00000000    
   0.00000000    
   0.00000000    
   0.00000000    
   0.00000000    
   0.00000000    
   0.00000000    
   0.00000000    
   0.00000000    
   0.00000000    
   0.00000000    
   0.00000000    
   0.00000000    
   0.00000000    
   0.00000000    
   0.00000000    
   0.00000000    
   0.00000000    
   0.00000000    
   0.00000000    
   0.00000000    
   0.00000000    
   0.00000000    
   0.00000000    
   0.00000000    
   0.00000000    
   0.00000000    
   0.00000000    
   0.00000000    
   0.00000000    
   0.00000000    
   0.00000000    
   0.00000000    
   0.00000000    
   0.00000000    
   0.00000000    
   0.00000000    
   0.00000000    
   0.00000000    
   0.00000000    
   0.00000000    
   0.00000000    
   0.00000000    
   0.00000000    
   0.00000000    
   0.00000000    
   0.00000000    
   0.00000000    
   0.00000000    
   0.00000000    
   0.00000000    
   0.00000000    
   0.00000000    
   0.00000000    
   0.00000000    
   0.00000000    
   0.00000000    
   0.00000000    
   0.00000000    
   0.00000000    
   0.00000000    
   0.00000000    
   0.00000000    
   0.00000000    
   0.00000000    
   0.00000000    
   0.00000000    
   0.00000000    
   0.00000000    
   0.00000000    
   0.00000000    
   0.00000000    
   0.00000000    
   0.00000000    
   0.00000000    
   0.00000000    
   0.00000000    
   0.00000000    
   0.00000000    
   0.00000000    
   0.00000000    
   0.00000000    
   0.00000000    
   0.00000000    
   0.00000000    
   0.00000000    
   0.00000000    
   0.00000000    
   0.00000000    
   1.00000000    
   0.00000000    
   0.00000000    
   0.00000000    
   0.00000000    
   0.00000000    
   0.00000000    
   0.00000000    
   0.00000000    
   0.00000000    
   0.00000000    
   0.00000000    
   0.00000000    
   0.00000000    
   0.00000000    
   0.00000000    
   0.00000000    
   0.00000000    
   0.00000000    
   0.00000000    
   0.00000000    
   0.00000000    
   0.00000000    
   0.00000000    
   0.00000000    
   0.00000000    
   0.00000000    
   0.00000000    
   0.00000000    
   0.00000000    
   0.00000000    
   0.00000000    
   0.00000000    
   0.00000000    
   0.00000000    
   0.00000000    
   0.00000000    
   0.00000000    
   0.00000000    
   0.00000000    
   0.00000000    
   0.00000000    
   0.00000000    
   0.00000000    
   0.00000000    
   0.00000000    
   0.00000000    
   0.00000000    
   0.00000000    
   0.00000000    
   0.00000000    
   0.00000000    
   0.00000000    
   0.00000000    
   0.00000000    
   0.00000000    
   0.00000000    
   0.00000000    
   0.00000000    
   0.00000000    
   0.00000000    
   0.00000000    
   0.00000000    
   0.00000000    
   0.00000000    
   0.00000000    
   0.00000000    
   0.00000000    
   0.00000000    
   0.00000000    
   0.00000000    
   0.00000000    
   0.00000000    
   0.00000000    
   0.00000000    
   0.00000000    
   0.00000000    
   0.00000000    
   0.00000000    
   0.00000000    
   0.00000000    
   0.00000000    
   0.00000000    
   0.00000000    
   0.00000000    
   0.00000000    
   0.00000000    
   0.00000000    
   0.00000000    
   0.00000000    
   0.00000000    
   0.00000000    
   0.00000000    
   0.00000000    
   0.00000000    
   0.00000000    
   0.00000000    
   0.00000000    
   0.00000000    
   0.00000000    
   0.00000000    
   0.00000000    
   0.00000000    
   0.00000000    
   0.00000000    
   0.00000000    
   0.00000000    
   0.00000000    
   0.00000000    
   0.00000000    
   0.00000000    
   0.00000000    
   0.00000000    
   0.00000000    
   0.00000000    
   0.00000000    
   0.00000000    
   0.00000000    
   0.00000000    
   0.00000000    
   0.00000000    
   0.00000000    
   0.00000000    
   0.00000000    
   0.00000000    
   0.00000000    
   1.00000000    
   0.00000000    
   0.00000000    
   0.00000000    
   0.00000000    
   0.00000000    
   0.00000000    
   0.00000000    
   0.00000000    
   0.00000000    
   0.00000000    
   0.00000000    
   0.00000000    
   0.00000000    
   0.00000000    
   0.00000000    
   0.00000000    
   0.00000000    
   0.00000000    
   0.00000000    
   0.00000000    
   0.00000000    
   0.00000000    
   0.00000000    
   0.00000000    
   0.00000000    
   0.00000000    
   0.00000000    
   0.00000000    
   0.00000000    
   0.00000000    
   0.00000000    
   0.00000000    
   0.00000000    
   0.00000000    
   0.00000000    
   0.00000000    
   0.00000000    
   0.00000000    
   0.00000000    
   0.00000000    
   0.00000000    
   0.00000000    
   0.00000000    
   0.00000000    
   0.00000000    
   0.00000000    
   0.00000000    
   0.00000000    
   0.00000000    
   0.00000000    
   0.00000000    
   0.00000000    
   0.00000000    
   0.00000000    
   0.00000000    
   0.00000000    
   0.00000000    
   0.00000000    
   0.00000000    
   0.00000000    
   0.00000000    
   1.00000000    
   0.00000000    
   0.00000000    
   0.00000000    
   0.00000000    
   0.00000000    
   0.00000000    
   1.00000000    
   0.00000000    
   0.00000000    
   0.00000000    
   0.00000000    
   0.00000000    
   0.00000000    
   0.00000000    
   0.00000000    
   0.00000000    
   0.00000000    
   0.00000000    
   0.00000000    
   0.00000000    
   0.00000000    
   0.00000000    
   0.00000000    
   0.00000000    
   0.00000000    
   0.00000000    
   0.00000000    
   0.00000000    
   0.00000000    
   0.00000000    
   0.00000000    
   0.00000000    
   0.00000000    
   0.00000000    
   0.00000000    
   0.00000000    
   0.00000000    
   0.00000000    
   0.00000000    
   0.00000000    
   0.00000000    
   0.00000000    
   0.00000000    
   0.00000000    
   0.00000000    
   0.00000000    
   0.00000000    
   0.00000000    
   0.00000000    
   0.00000000    
   0.00000000    
   0.00000000    
   0.00000000    
   0.00000000    
   0.00000000    
   0.00000000    
   0.00000000    
   0.00000000    
   1.00000000    
   0.00000000    
   0.00000000    
   0.00000000    
   0.00000000    
   0.00000000    
   0.00000000    
   0.00000000    
   0.00000000    
   0.00000000    
   0.00000000    
   0.00000000    
   0.00000000    
   0.00000000    
   0.00000000    
   0.00000000    
   0.00000000    
   0.00000000    
   0.00000000    
   0.00000000    
   0.00000000    
   0.00000000    
   0.00000000    
   0.00000000    
   0.00000000    
   0.00000000    
   0.00000000    
   0.00000000    
   0.00000000    
   0.00000000    
   0.00000000    
   0.00000000    
   0.00000000    
   0.00000000    
   0.00000000    
   0.00000000    
   0.00000000    
   0.00000000    
   0.00000000    
   0.00000000    
   0.00000000    
   0.00000000    
   0.00000000    
   0.00000000    
   0.00000000    
   0.00000000    
   0.00000000    
   0.00000000    
   0.00000000    
   0.00000000    
   0.00000000    
   0.00000000    
   0.00000000    
   0.00000000    
   0.00000000    
   0.00000000    
   0.00000000    
   0.00000000    
   0.00000000    
   0.00000000    
   0.00000000    
   0.00000000    
   0.00000000    
   2.00000000    
   0.00000000    
   0.00000000    
   1.00000000    
   0.00000000    
   0.00000000    
   0.00000000    
   0.00000000    
   0.00000000    
   0.00000000    
   0.00000000    
   0.00000000    
   0.00000000    
   0.00000000    
   0.00000000    
   0.00000000    
   0.00000000    
   0.00000000    
   0.00000000    
   0.00000000    
   0.00000000    
   0.00000000    
   0.00000000    
   0.00000000    
   0.00000000    
   0.00000000    
   0.00000000    
   0.00000000    
   0.00000000    
   0.00000000    
   0.00000000    
   0.00000000    
   0.00000000    
   0.00000000    
   0.00000000    
   0.00000000    
   0.00000000    
   0.00000000    
   0.00000000    
   0.00000000    
   0.00000000    
   0.00000000    
   0.00000000    
   0.00000000    
   0.00000000    
   0.00000000    
   0.00000000    
   0.00000000    
   0.00000000    
   0.00000000    
   0.00000000    
   0.00000000    
   0.00000000    
   0.00000000    
   0.00000000    
   0.00000000    
   0.00000000    
   0.00000000    
   0.00000000    
   0.00000000    
   1.00000000    
   0.00000000    
   1.00000000    
   0.00000000    
   0.00000000    
   1.00000000    
   0.00000000    
   0.00000000    
   0.00000000    
   0.00000000    
   0.00000000    
   0.00000000    
   0.00000000    
   1.00000000    
   0.00000000    
   0.00000000    
   0.00000000    
   0.00000000    
   0.00000000    
   0.00000000    
   0.00000000    
   0.00000000    
   0.00000000    
   0.00000000    
   0.00000000    
   0.00000000    
   0.00000000    
   0.00000000    
   0.00000000    
   0.00000000    
   0.00000000    
   0.00000000    
   0.00000000    
   0.00000000    
   0.00000000    
   0.00000000    
   0.00000000    
   0.00000000    
   0.00000000    
   0.00000000    
   0.00000000    
   0.00000000    
   0.00000000    
   0.00000000    
   0.00000000    
   0.00000000    
   0.00000000    
   0.00000000    
   0.00000000    
   0.00000000    
   0.00000000    
   0.00000000    
   0.00000000    
   0.00000000    
   0.00000000    
   0.00000000    
   0.00000000    
   0.00000000    
   0.00000000    
   0.00000000    
   0.00000000    
   0.00000000    
   0.00000000    
   0.00000000    
   0.00000000    
   1.00000000    
   0.00000000    
   0.00000000    
   1.00000000    
   0.00000000    
   0.00000000    
   0.00000000    
   1.00000000    
   0.00000000    
   1.00000000    
   0.00000000    
   0.00000000    
   0.00000000    
   1.00000000    
   1.00000000    
   0.00000000    
   0.00000000    
   0.00000000    
   0.00000000    
   0.00000000    
   0.00000000    
   0.00000000    
   0.00000000    
   0.00000000    
   0.00000000    
   0.00000000    
   0.00000000    
   0.00000000    
   0.00000000    
   0.00000000    
   0.00000000    
   0.00000000    
   0.00000000    
   0.00000000    
   0.00000000    
   0.00000000    
   0.00000000    
   0.00000000    
   0.00000000    
   0.00000000    
   0.00000000    
   0.00000000    
   0.00000000    
   0.00000000    
   0.00000000    
   0.00000000    
   0.00000000    
   0.00000000    
   0.00000000    
   0.00000000    
   0.00000000    
   0.00000000    
   0.00000000    
   0.00000000    
   0.00000000    
   0.00000000    
   0.00000000    
   0.00000000    
   0.00000000    
   0.00000000    
   0.00000000    
   0.00000000    
   0.00000000    
   1.00000000    
   0.00000000    
   0.00000000    
   0.00000000    
   1.00000000    
   0.00000000    
   0.00000000    
   0.00000000    
   0.00000000    
   0.00000000    
   0.00000000    
   1.00000000    
   0.00000000    
   1.00000000    
   2.00000000    
   0.00000000    
   0.00000000    
   1.00000000    
   0.00000000    
   0.00000000    
   1.00000000    
   0.00000000    
   0.00000000    
   0.00000000    
   1.00000000    
   0.00000000    
   0.00000000    
   0.00000000    
   0.00000000    
   0.00000000    
   0.00000000    
   0.00000000    
   0.00000000    
   0.00000000    
   0.00000000    
   0.00000000    
   0.00000000    
   0.00000000    
   0.00000000    
   0.00000000    
   0.00000000    
   0.00000000    
   0.00000000    
   0.00000000    
   0.00000000    
   0.00000000    
   0.00000000    
   0.00000000    
   0.00000000    
   0.00000000    
   0.00000000    
   0.00000000    
   0.00000000    
   0.00000000    
   0.00000000    
   0.00000000    
   0.00000000    
   0.00000000    
   0.00000000    
   0.00000000    
   0.00000000    
   0.00000000    
   0.00000000    
   0.00000000    
   0.00000000    
   0.00000000    
   0.00000000    
   0.00000000    
   0.00000000    
   1.00000000    
   0.00000000    
   0.00000000    
   0.00000000    
   2.00000000    
   0.00000000    
   0.00000000    
   1.00000000    
   0.00000000    
   0.00000000    
   0.00000000    
   0.00000000    
   0.00000000    
   1.00000000    
   0.00000000    
   0.00000000    
   0.00000000    
   0.00000000    
   1.00000000    
   0.00000000    
   0.00000000    
   0.00000000    
   0.00000000    
   0.00000000    
   0.00000000    
   0.00000000    
   0.00000000    
   0.00000000    
   0.00000000    
   0.00000000    
   0.00000000    
   0.00000000    
   0.00000000    
   0.00000000    
   0.00000000    
   0.00000000    
   0.00000000    
   0.00000000    
   0.00000000    
   0.00000000    
   0.00000000    
   0.00000000    
   0.00000000    
   0.00000000    
   0.00000000    
   0.00000000    
   0.00000000    
   0.00000000    
   0.00000000    
   0.00000000    
   0.00000000    
   0.00000000    
   0.00000000    
   0.00000000    
   0.00000000    
   0.00000000    
   0.00000000    
   0.00000000    
   0.00000000    
   0.00000000    
   0.00000000    
   2.00000000    
   0.00000000    
   0.00000000    
   0.00000000    
   0.00000000    
   0.00000000    
   0.00000000    
   1.00000000    
   0.00000000    
   1.00000000    
   0.00000000    
   0.00000000    
   0.00000000    
   0.00000000    
   0.00000000    
   1.00000000    
   0.00000000    
   0.00000000    
   0.00000000    
   0.00000000    
   0.00000000    
   0.00000000    
   0.00000000    
   0.00000000    
   0.00000000    
   0.00000000    
   0.00000000    
   0.00000000    
   0.00000000    
   0.00000000    
   0.00000000    
   0.00000000    
   0.00000000    
   0.00000000    
   0.00000000    
   0.00000000    
   0.00000000    
   0.00000000    
   0.00000000    
   0.00000000    
   0.00000000    
   0.00000000    
   0.00000000    
   0.00000000    
   0.00000000    
   0.00000000    
   0.00000000    
   0.00000000    
   0.00000000    
   0.00000000    
   0.00000000    
   0.00000000    
   0.00000000    
   0.00000000    
   0.00000000    
   0.00000000    
   0.00000000    
   0.00000000    
   0.00000000    
   0.00000000    
   0.00000000    
   0.00000000    
   1.00000000    
   0.00000000    
   0.00000000    
   0.00000000    
   0.00000000    
   1.00000000    
   0.00000000    
   0.00000000    
   0.00000000    
   0.00000000    
   0.00000000    
   2.00000000    
   0.00000000    
   0.00000000    
   1.00000000    
   0.00000000    
   0.00000000    
   0.00000000    
   0.00000000    
   1.00000000    
   0.00000000    
   1.00000000    
   0.00000000    
   1.00000000    
   0.00000000    
   0.00000000    
   1.00000000    
   0.00000000    
   0.00000000    
   0.00000000    
   0.00000000    
   0.00000000    
   0.00000000    
   0.00000000    
   0.00000000    
   0.00000000    
   0.00000000    
   0.00000000    
   0.00000000    
   0.00000000    
   0.00000000    
   0.00000000    
   0.00000000    
   0.00000000    
   0.00000000    
   0.00000000    
   0.00000000    
   0.00000000    
   0.00000000    
   0.00000000    
   0.00000000    
   0.00000000    
   0.00000000    
   0.00000000    
   0.00000000    
   0.00000000    
   0.00000000    
   0.00000000    
   0.00000000    
   0.00000000    
   0.00000000    
   0.00000000    
   0.00000000    
   0.00000000    
   0.00000000    
   0.00000000    
   1.00000000    
   1.00000000    
   0.00000000    
   0.00000000    
   0.00000000    
   1.00000000    
   0.00000000    
   0.00000000    
   0.00000000    
   1.00000000    
   0.00000000    
   2.00000000    
   1.00000000    
   0.00000000    
   0.00000000    
   0.00000000    
   2.00000000    
   1.00000000    
   0.00000000    
   1.00000000    
   0.00000000    
   1.00000000    
   0.00000000    
   0.00000000    
   0.00000000    
   0.00000000    
   0.00000000    
   0.00000000    
   0.00000000    
   0.00000000    
   0.00000000    
   0.00000000    
   0.00000000    
   0.00000000    
   0.00000000    
   0.00000000    
   0.00000000    
   0.00000000    
   0.00000000    
   0.00000000    
   0.00000000    
   0.00000000    
   0.00000000    
   0.00000000    
   0.00000000    
   0.00000000    
   0.00000000    
   0.00000000    
   0.00000000    
   0.00000000    
   0.00000000    
   0.00000000    
   0.00000000    
   0.00000000    
   0.00000000    
   0.00000000    
   0.00000000    
   0.00000000    
   0.00000000    
   0.00000000    
   0.00000000    
   0.00000000    
   0.00000000    
   1.00000000    
   1.00000000    
   0.00000000    
   0.00000000    
   1.00000000    
   1.00000000    
   0.00000000    
   1.00000000    
   0.00000000    
   0.00000000    
   0.00000000    
   2.00000000    
   0.00000000    
   0.00000000    
   0.00000000    
   0.00000000    
   0.00000000    
   0.00000000    
   1.00000000    
   2.00000000    
   1.00000000    
   0.00000000    
   0.00000000    
   0.00000000    
   0.00000000    
   0.00000000    
   0.00000000    
   0.00000000    
   0.00000000    
   0.00000000    
   0.00000000    
   0.00000000    
   0.00000000    
   0.00000000    
   0.00000000    
   0.00000000    
   0.00000000    
   0.00000000    
   0.00000000    
   0.00000000    
   0.00000000    
   0.00000000    
   0.00000000    
   0.00000000    
   0.00000000    
   0.00000000    
   0.00000000    
   0.00000000    
   0.00000000    
   0.00000000    
   0.00000000    
   0.00000000    
   0.00000000    
   0.00000000    
   0.00000000    
   0.00000000    
   0.00000000    
   0.00000000    
   0.00000000    
   0.00000000    
   0.00000000    
   0.00000000    
   0.00000000    
   0.00000000    
   1.00000000    
   0.00000000    
   0.00000000    
   0.00000000    
   0.00000000    
   0.00000000    
   0.00000000    
   0.00000000    
   1.00000000    
   0.00000000    
   0.00000000    
   0.00000000    
   0.00000000    
   1.00000000    
   1.00000000    
   0.00000000    
   0.00000000    
   0.00000000    
   0.00000000    
   0.00000000    
   0.00000000    
   0.00000000    
   0.00000000    
   0.00000000    
   0.00000000    
   0.00000000    
   0.00000000    
   0.00000000    
   0.00000000    
   0.00000000    
   0.00000000    
   0.00000000    
   0.00000000    
   0.00000000    
   0.00000000    
   0.00000000    
   0.00000000    
   0.00000000    
   0.00000000    
   0.00000000    
   0.00000000    
   0.00000000    
   0.00000000    
   0.00000000    
   0.00000000    
   0.00000000    
   0.00000000    
   0.00000000    
   0.00000000    
   0.00000000    
   0.00000000    
   0.00000000    
   0.00000000    
   0.00000000    
   0.00000000    
   0.00000000    
   0.00000000    
   0.00000000    
   0.00000000    
   0.00000000    
   0.00000000    
   0.00000000    
   0.00000000    
   0.00000000    
   0.00000000    
   0.00000000    
   0.00000000    
   0.00000000    
   0.00000000    
   0.00000000    
   1.00000000    
   0.00000000    
   0.00000000    
   0.00000000    
   0.00000000    
   1.00000000    
   0.00000000    
   0.00000000    
   0.00000000    
   0.00000000    
   0.00000000    
   0.00000000    
   0.00000000    
   1.00000000    
   0.00000000    
   0.00000000    
   0.00000000    
   0.00000000    
   0.00000000    
   0.00000000    
   0.00000000    
   0.00000000    
   0.00000000    
   0.00000000    
   0.00000000    
   0.00000000    
   0.00000000    
   0.00000000    
   0.00000000    
   0.00000000    
   0.00000000    
   0.00000000    
   0.00000000    
   0.00000000    
   0.00000000    
   0.00000000    
   0.00000000    
   0.00000000    
   0.00000000    
   0.00000000    
   0.00000000    
   0.00000000    
   0.00000000    
   0.00000000    
   0.00000000    
   0.00000000    
   0.00000000    
   0.00000000    
   0.00000000    
   0.00000000    
   0.00000000    
   0.00000000    
   0.00000000    
   0.00000000    
   0.00000000    
   0.00000000    
   0.00000000    
   0.00000000    
   0.00000000    
   0.00000000    
   0.00000000    
   0.00000000    
   0.00000000    
   1.00000000    
   0.00000000    
   0.00000000    
   0.00000000    
   0.00000000    
   0.00000000    
   0.00000000    
   0.00000000    
   0.00000000    
   0.00000000    
   0.00000000    
   0.00000000    
   1.00000000    
   1.00000000    
   0.00000000    
   0.00000000    
   1.00000000    
   1.00000000    
   0.00000000    
   0.00000000    
   0.00000000    
   1.00000000    
   0.00000000    
   0.00000000    
   0.00000000    
   0.00000000    
   0.00000000    
   0.00000000    
   0.00000000    
   0.00000000    
   0.00000000    
   0.00000000    
   0.00000000    
   0.00000000    
   0.00000000    
   0.00000000    
   0.00000000    
   0.00000000    
   0.00000000    
   0.00000000    
   0.00000000    
   0.00000000    
   0.00000000    
   0.00000000    
   0.00000000    
   0.00000000    
   0.00000000    
   0.00000000    
   0.00000000    
   0.00000000    
   0.00000000    
   0.00000000    
   0.00000000    
   0.00000000    
   0.00000000    
   0.00000000    
   0.00000000    
   0.00000000    
   0.00000000    
   0.00000000    
   1.00000000    
   0.00000000    
   0.00000000    
   0.00000000    
   0.00000000    
   1.00000000    
   0.00000000    
   0.00000000    
   1.00000000    
   1.00000000    
   1.00000000    
   1.00000000    
   1.00000000    
   1.00000000    
   2.00000000    
   1.00000000    
   0.00000000    
   0.00000000    
   0.00000000    
   0.00000000    
   2.00000000    
   1.00000000    
   1.00000000    
   0.00000000    
   0.00000000    
   0.00000000    
   0.00000000    
   0.00000000    
   0.00000000    
   0.00000000    
   0.00000000    
   0.00000000    
   0.00000000    
   0.00000000    
   0.00000000    
   0.00000000    
   0.00000000    
   0.00000000    
   0.00000000    
   0.00000000    
   0.00000000    
   0.00000000    
   0.00000000    
   0.00000000    
   0.00000000    
   0.00000000    
   0.00000000    
   0.00000000    
   0.00000000    
   0.00000000    
   0.00000000    
   0.00000000    
   0.00000000    
   0.00000000    
   0.00000000    
   0.00000000    
   0.00000000    
   0.00000000    
   0.00000000    
   0.00000000    
   0.00000000    
   0.00000000    
   0.00000000    
   0.00000000    
   0.00000000    
   1.00000000    
   0.00000000    
   0.00000000    
   0.00000000    
   0.00000000    
   0.00000000    
   1.00000000    
   1.00000000    
   0.00000000    
   0.00000000    
   0.00000000    
   0.00000000    
   0.00000000    
   0.00000000    
   2.00000000    
   1.00000000    
   0.00000000    
   0.00000000    
   0.00000000    
   0.00000000    
   0.00000000    
   0.00000000    
   0.00000000    
   0.00000000    
   0.00000000    
   0.00000000    
   0.00000000    
   0.00000000    
   0.00000000    
   0.00000000    
   0.00000000    
   0.00000000    
   0.00000000    
   0.00000000    
   0.00000000    
   0.00000000    
   0.00000000    
   0.00000000    
   0.00000000    
   0.00000000    
   0.00000000    
   0.00000000    
   0.00000000    
   0.00000000    
   0.00000000    
   0.00000000    
   0.00000000    
   0.00000000    
   0.00000000    
   0.00000000    
   0.00000000    
   0.00000000    
   0.00000000    
   0.00000000    
   0.00000000    
   0.00000000    
   0.00000000    
   0.00000000    
   0.00000000    
   0.00000000    
   0.00000000    
   0.00000000    
   0.00000000    
   0.00000000    
   1.00000000    
   2.00000000    
   3.00000000    
   1.00000000    
   1.00000000    
   0.00000000    
   0.00000000    
   0.00000000    
   0.00000000    
   2.00000000    
   0.00000000    
   0.00000000    
   1.00000000    
   1.00000000    
   0.00000000    
   0.00000000    
   0.00000000    
   0.00000000    
   0.00000000    
   0.00000000    
   1.00000000    
   0.00000000    
   0.00000000    
   0.00000000    
   0.00000000    
   0.00000000    
   0.00000000    
   0.00000000    
   0.00000000    
   0.00000000    
   0.00000000    
   0.00000000    
   0.00000000    
   0.00000000    
   0.00000000    
   0.00000000    
   0.00000000    
   0.00000000    
   0.00000000    
   0.00000000    
   0.00000000    
   0.00000000    
   0.00000000    
   0.00000000    
   0.00000000    
   0.00000000    
   0.00000000    
   0.00000000    
   0.00000000    
   0.00000000    
   0.00000000    
   0.00000000    
   0.00000000    
   0.00000000    
   0.00000000    
   0.00000000    
   0.00000000    
   0.00000000    
   0.00000000    
   0.00000000    
   0.00000000    
   0.00000000    
   0.00000000    
   1.00000000    
   0.00000000    
   0.00000000    
   1.00000000    
   0.00000000    
   0.00000000    
   0.00000000    
   0.00000000    
   1.00000000    
   0.00000000    
   0.00000000    
   0.00000000    
   0.00000000    
   0.00000000    
   1.00000000    
   1.00000000    
   1.00000000    
   0.00000000    
   0.00000000    
   0.00000000    
   0.00000000    
   1.00000000    
   0.00000000    
   0.00000000    
   0.00000000    
   0.00000000    
   0.00000000    
   0.00000000    
   0.00000000    
   0.00000000    
   0.00000000    
   0.00000000    
   0.00000000    
   0.00000000    
   0.00000000    
   0.00000000    
   0.00000000    
   0.00000000    
   0.00000000    
   0.00000000    
   0.00000000    
   0.00000000    
   0.00000000    
   0.00000000    
   0.00000000    
   0.00000000    
   0.00000000    
   0.00000000    
   0.00000000    
   0.00000000    
   0.00000000    
   0.00000000    
   0.00000000    
   0.00000000    
   0.00000000    
   0.00000000    
   0.00000000    
   0.00000000    
   0.00000000    
   0.00000000    
   0.00000000    
   0.00000000    
   1.00000000    
   0.00000000    
   0.00000000    
   0.00000000    
   1.00000000    
   0.00000000    
   0.00000000    
   0.00000000    
   0.00000000    
   1.00000000    
   0.00000000    
   1.00000000    
   0.00000000    
   0.00000000    
   0.00000000    
   0.00000000    
   0.00000000    
   0.00000000    
   1.00000000    
   0.00000000    
   2.00000000    
   0.00000000    
   0.00000000    
   0.00000000    
   0.00000000    
   0.00000000    
   0.00000000    
   0.00000000    
   0.00000000    
   0.00000000    
   0.00000000    
   0.00000000    
   0.00000000    
   0.00000000    
   0.00000000    
   0.00000000    
   0.00000000    
   0.00000000    
   0.00000000    
   0.00000000    
   0.00000000    
   0.00000000    
   0.00000000    
   0.00000000    
   0.00000000    
   0.00000000    
   0.00000000    
   0.00000000    
   0.00000000    
   0.00000000    
   0.00000000    
   0.00000000    
   0.00000000    
   0.00000000    
   0.00000000    
   0.00000000    
   0.00000000    
   0.00000000    
   0.00000000    
   0.00000000    
   0.00000000    
   0.00000000    
   0.00000000    
   0.00000000    
   0.00000000    
   0.00000000    
   0.00000000    
   0.00000000    
   0.00000000    
   0.00000000    
   0.00000000    
   1.00000000    
   0.00000000    
   0.00000000    
   0.00000000    
   0.00000000    
   0.00000000    
   1.00000000    
   2.00000000    
   0.00000000    
   0.00000000    
   1.00000000    
   0.00000000    
   0.00000000    
   0.00000000    
   0.00000000    
   1.00000000    
   0.00000000    
   1.00000000    
   0.00000000    
   0.00000000    
   0.00000000    
   0.00000000    
   0.00000000    
   0.00000000    
   0.00000000    
   0.00000000    
   0.00000000    
   0.00000000    
   0.00000000    
   0.00000000    
   0.00000000    
   0.00000000    
   0.00000000    
   0.00000000    
   0.00000000    
   0.00000000    
   0.00000000    
   0.00000000    
   0.00000000    
   0.00000000    
   0.00000000    
   0.00000000    
   0.00000000    
   0.00000000    
   0.00000000    
   0.00000000    
   0.00000000    
   0.00000000    
   0.00000000    
   0.00000000    
   0.00000000    
   0.00000000    
   0.00000000    
   0.00000000    
   0.00000000    
   0.00000000    
   0.00000000    
   0.00000000    
   0.00000000    
   0.00000000    
   0.00000000    
   0.00000000    
   1.00000000    
   0.00000000    
   0.00000000    
   0.00000000    
   1.00000000    
   0.00000000    
   0.00000000    
   0.00000000    
   0.00000000    
   2.00000000    
   0.00000000    
   2.00000000    
   1.00000000    
   1.00000000    
   0.00000000    
   0.00000000    
   0.00000000    
   0.00000000    
   1.00000000    
   0.00000000    
   0.00000000    
   0.00000000    
   0.00000000    
   0.00000000    
   0.00000000    
   0.00000000    
   0.00000000    
   0.00000000    
   0.00000000    
   0.00000000    
   0.00000000    
   0.00000000    
   0.00000000    
   0.00000000    
   0.00000000    
   0.00000000    
   0.00000000    
   0.00000000    
   0.00000000    
   0.00000000    
   0.00000000    
   0.00000000    
   0.00000000    
   0.00000000    
   0.00000000    
   0.00000000    
   0.00000000    
   0.00000000    
   0.00000000    
   0.00000000    
   0.00000000    
   0.00000000    
   0.00000000    
   0.00000000    
   0.00000000    
   0.00000000    
   0.00000000    
   0.00000000    
   0.00000000    
   0.00000000    
   0.00000000    
   1.00000000    
   0.00000000    
   0.00000000    
   0.00000000    
   1.00000000    
   0.00000000    
   0.00000000    
   0.00000000    
   0.00000000    
   0.00000000    
   1.00000000    
   0.00000000    
   0.00000000    
   3.00000000    
   1.00000000    
   0.00000000    
   0.00000000    
   1.00000000    
   0.00000000    
   0.00000000    
   1.00000000    
   0.00000000    
   1.00000000    
   0.00000000    
   0.00000000    
   0.00000000    
   0.00000000    
   0.00000000    
   0.00000000    
   0.00000000    
   0.00000000    
   0.00000000    
   0.00000000    
   0.00000000    
   0.00000000    
   0.00000000    
   0.00000000    
   0.00000000    
   0.00000000    
   0.00000000    
   0.00000000    
   0.00000000    
   0.00000000    
   0.00000000    
   0.00000000    
   0.00000000    
   0.00000000    
   0.00000000    
   0.00000000    
   0.00000000    
   0.00000000    
   0.00000000    
   0.00000000    
   0.00000000    
   0.00000000    
   0.00000000    
   0.00000000    
   0.00000000    
   0.00000000    
   0.00000000    
   0.00000000    
   0.00000000    
   0.00000000    
   0.00000000    
   0.00000000    
   0.00000000    
   0.00000000    
   1.00000000    
   2.00000000    
   0.00000000    
   1.00000000    
   1.00000000    
   0.00000000    
   0.00000000    
   0.00000000    
   2.00000000    
   0.00000000    
   0.00000000    
   1.00000000    
   0.00000000    
   0.00000000    
   0.00000000    
   2.00000000    
   0.00000000    
   1.00000000    
   0.00000000    
   0.00000000    
   0.00000000    
   0.00000000    
   0.00000000    
   0.00000000    
   0.00000000    
   0.00000000    
   0.00000000    
   0.00000000    
   0.00000000    
   0.00000000    
   0.00000000    
   0.00000000    
   0.00000000    
   0.00000000    
   0.00000000    
   0.00000000    
   0.00000000    
   0.00000000    
   0.00000000    
   0.00000000    
   0.00000000    
   0.00000000    
   0.00000000    
   0.00000000    
   0.00000000    
   0.00000000    
   0.00000000    
   0.00000000    
   0.00000000    
   0.00000000    
   0.00000000    
   0.00000000    
   0.00000000    
   0.00000000    
   0.00000000    
   0.00000000    
   0.00000000    
   0.00000000    
   0.00000000    
   0.00000000    
   1.00000000    
   0.00000000    
   0.00000000    
   1.00000000    
   0.00000000    
   0.00000000    
   0.00000000    
   1.00000000    
   0.00000000    
   0.00000000    
   0.00000000    
   2.00000000    
   0.00000000    
   0.00000000    
   0.00000000    
   1.00000000    
   0.00000000    
   1.00000000    
   2.00000000    
   1.00000000    
   1.00000000    
   0.00000000    
   0.00000000    
   0.00000000    
   0.00000000    
   0.00000000    
   0.00000000    
   0.00000000    
   0.00000000    
   0.00000000    
   0.00000000    
   0.00000000    
   0.00000000    
   0.00000000    
   0.00000000    
   0.00000000    
   0.00000000    
   0.00000000    
   0.00000000    
   0.00000000    
   0.00000000    
   0.00000000    
   0.00000000    
   0.00000000    
   0.00000000    
   0.00000000    
   0.00000000    
   0.00000000    
   0.00000000    
   0.00000000    
   0.00000000    
   0.00000000    
   0.00000000    
   0.00000000    
   0.00000000    
   0.00000000    
   0.00000000    
   0.00000000    
   0.00000000    
   0.00000000    
   0.00000000    
   0.00000000    
   0.00000000    
   0.00000000    
   0.00000000    
   1.00000000    
   0.00000000    
   0.00000000    
   0.00000000    
   0.00000000    
   0.00000000    
   0.00000000    
   0.00000000    
   0.00000000    
   1.00000000    
   0.00000000    
   1.00000000    
   0.00000000    
   0.00000000    
   0.00000000    
   0.00000000    
   0.00000000    
   0.00000000    
   0.00000000    
   1.00000000    
   0.00000000    
   0.00000000    
   0.00000000    
   0.00000000    
   0.00000000    
   0.00000000    
   0.00000000    
   0.00000000    
   0.00000000    
   0.00000000    
   0.00000000    
   0.00000000    
   0.00000000    
   0.00000000    
   0.00000000    
   0.00000000    
   0.00000000    
   0.00000000    
   0.00000000    
   0.00000000    
   0.00000000    
   0.00000000    
   0.00000000    
   0.00000000    
   0.00000000    
   0.00000000    
   0.00000000    
   0.00000000    
   0.00000000    
   0.00000000    
   0.00000000    
   0.00000000    
   0.00000000    
   0.00000000    
   0.00000000    
   0.00000000    
   0.00000000    
   0.00000000    
   0.00000000    
   0.00000000    
   0.00000000    
   0.00000000    
   0.00000000    
   0.00000000    
   0.00000000    
   0.00000000    
   0.00000000    
   0.00000000    
   1.00000000    
   0.00000000    
   0.00000000    
   1.00000000    
   0.00000000    
   0.00000000    
   0.00000000    
   0.00000000    
   0.00000000    
   1.00000000    
   1.00000000    
   0.00000000    
   0.00000000    
   0.00000000    
   0.00000000    
   0.00000000    
   0.00000000    
   0.00000000    
   0.00000000    
   0.00000000    
   0.00000000    
   0.00000000    
   0.00000000    
   0.00000000    
   0.00000000    
   0.00000000    
   0.00000000    
   0.00000000    
   0.00000000    
   0.00000000    
   0.00000000    
   0.00000000    
   0.00000000    
   0.00000000    
   0.00000000    
   0.00000000    
   0.00000000    
   0.00000000    
   0.00000000    
   0.00000000    
   0.00000000    
   0.00000000    
   0.00000000    
   0.00000000    
   0.00000000    
   0.00000000    
   0.00000000    
   0.00000000    
   0.00000000    
   0.00000000    
   0.00000000    
   0.00000000    
   0.00000000    
   0.00000000    
   0.00000000    
   0.00000000    
   0.00000000    
   0.00000000    
   0.00000000    
   0.00000000    
   0.00000000    
   0.00000000    
   0.00000000    
   1.00000000    
   0.00000000    
   1.00000000    
   0.00000000    
   0.00000000    
   1.00000000    
   0.00000000    
   0.00000000    
   0.00000000    
   0.00000000    
   0.00000000    
   0.00000000    
   1.00000000    
   0.00000000    
   0.00000000    
   0.00000000    
   0.00000000    
   0.00000000    
   0.00000000    
   0.00000000    
   0.00000000    
   0.00000000    
   0.00000000    
   0.00000000    
   0.00000000    
   0.00000000    
   0.00000000    
   0.00000000    
   0.00000000    
   0.00000000    
   0.00000000    
   0.00000000    
   0.00000000    
   0.00000000    
   0.00000000    
   0.00000000    
   0.00000000    
   0.00000000    
   0.00000000    
   0.00000000    
   0.00000000    
   0.00000000    
   0.00000000    
   0.00000000    
   0.00000000    
   0.00000000    
   0.00000000    
   0.00000000    
   0.00000000    
   0.00000000    
   0.00000000    
   0.00000000    
   0.00000000    
   0.00000000    
   0.00000000    
   0.00000000    
   0.00000000    
   0.00000000    
   0.00000000    
   0.00000000    
   0.00000000    
   0.00000000    
   0.00000000    
   0.00000000    
   0.00000000    
   0.00000000    
   0.00000000    
   0.00000000    
   2.00000000    
   0.00000000    
   1.00000000    
   0.00000000    
   0.00000000    
   0.00000000    
   0.00000000    
   0.00000000    
   0.00000000    
   0.00000000    
   0.00000000    
   0.00000000    
   0.00000000    
   0.00000000    
   0.00000000    
   0.00000000    
   0.00000000    
   0.00000000    
   0.00000000    
   0.00000000    
   0.00000000    
   0.00000000    
   0.00000000    
   0.00000000    
   0.00000000    
   0.00000000    
   0.00000000    
   0.00000000    
   0.00000000    
   0.00000000    
   0.00000000    
   0.00000000    
   0.00000000    
   0.00000000    
   0.00000000    
   0.00000000    
   0.00000000    
   0.00000000    
   0.00000000    
   0.00000000    
   0.00000000    
   0.00000000    
   0.00000000    
   0.00000000    
   0.00000000    
   0.00000000    
   0.00000000    
   0.00000000    
   0.00000000    
   0.00000000    
   0.00000000    
   0.00000000    
   0.00000000    
   0.00000000    
   0.00000000    
   0.00000000    
   0.00000000    
   0.00000000    
   0.00000000    
   0.00000000    
   0.00000000    
   0.00000000    
   0.00000000    
   0.00000000    
   0.00000000    
   0.00000000    
   0.00000000    
   1.00000000    
   0.00000000    
   0.00000000    
   0.00000000    
   0.00000000    
   0.00000000    
   0.00000000    
   0.00000000    
   0.00000000    
   0.00000000    
   0.00000000    
   0.00000000    
   0.00000000    
   0.00000000    
   0.00000000    
   0.00000000    
   0.00000000    
   0.00000000    
   0.00000000    
   0.00000000    
   0.00000000    
   0.00000000    
   0.00000000    
   0.00000000    
   0.00000000    
   0.00000000    
   0.00000000    
   0.00000000    
   0.00000000    
   0.00000000    
   0.00000000    
   0.00000000    
   0.00000000    
   0.00000000    
   0.00000000    
   0.00000000    
   0.00000000    
   0.00000000    
   0.00000000    
   0.00000000    
   0.00000000    
   0.00000000    
   0.00000000    
   0.00000000    
   0.00000000    
   0.00000000    
   0.00000000    
   0.00000000    
   0.00000000    
   0.00000000    
   0.00000000    
   0.00000000    
   0.00000000    
   0.00000000    
   0.00000000    
   0.00000000    
   0.00000000    
   0.00000000    
   0.00000000    
   0.00000000    
   0.00000000    
   0.00000000    
   0.00000000    
   0.00000000    
   0.00000000    
   0.00000000    
   0.00000000    
   0.00000000    
   0.00000000    
   0.00000000    
   0.00000000    
   0.00000000    
   0.00000000    
   0.00000000    
   0.00000000    
   0.00000000    
   0.00000000    
   0.00000000    
   0.00000000    
   0.00000000    
   0.00000000    
   0.00000000    
   0.00000000    
   0.00000000    
   0.00000000    
   0.00000000    
   0.00000000    
   0.00000000    
   0.00000000    
   0.00000000    
   0.00000000    
   0.00000000    
   0.00000000    
   0.00000000    
   0.00000000    
   0.00000000    
   0.00000000    
   0.00000000    
   0.00000000    
   0.00000000    
   0.00000000    
   0.00000000    
   0.00000000    
   0.00000000    
   0.00000000    
   0.00000000    
   0.00000000    
   0.00000000    
   0.00000000    
   0.00000000    
   0.00000000    
   0.00000000    
   0.00000000    
   0.00000000    
   0.00000000    
   0.00000000    
   0.00000000    
   0.00000000    
   0.00000000    
   0.00000000    
   0.00000000    
   0.00000000    
   0.00000000    
   0.00000000    
   0.00000000    
   0.00000000    
   0.00000000    
   0.00000000    
   0.00000000    
   0.00000000    
   0.00000000    
   0.00000000    
   0.00000000    
   0.00000000    
   0.00000000    
   0.00000000    
   0.00000000    
   0.00000000    
   0.00000000    
   0.00000000    
   0.00000000    
   0.00000000    
   0.00000000    
   0.00000000    
   0.00000000    
   0.00000000    
   0.00000000    
   0.00000000    
   0.00000000    
   0.00000000    
   0.00000000    
   0.00000000    
   0.00000000    
   0.00000000    
   0.00000000    
   0.00000000    
   0.00000000    
   0.00000000    
   0.00000000    
   0.00000000    
   0.00000000    
   0.00000000    
   0.00000000    
   0.00000000    
   0.00000000    
   0.00000000    
   0.00000000    
   0.00000000    
   0.00000000    
   0.00000000    
   0.00000000    
   0.00000000    
   0.00000000    
   0.00000000    
   0.00000000    
   0.00000000    
   0.00000000    
   0.00000000    
   0.00000000    
   0.00000000    
   0.00000000    
   0.00000000    
   0.00000000    
   0.00000000    
   0.00000000    
   0.00000000    
   0.00000000    
   0.00000000    
   0.00000000    
   0.00000000    
   0.00000000    
   0.00000000    
   0.00000000    
   0.00000000    
   0.00000000    
   0.00000000    
   0.00000000    
   0.00000000    
   0.00000000    
   0.00000000    
   0.00000000    
   0.00000000    
   0.00000000    
   0.00000000    
   0.00000000    
   0.00000000    
   0.00000000    
   0.00000000    
   0.00000000    
   0.00000000    
   0.00000000    
   0.00000000    
   0.00000000    
   0.00000000    
   0.00000000    
   0.00000000    
   0.00000000    
   0.00000000    
   0.00000000    
   0.00000000    
   0.00000000    
   0.00000000    
   0.00000000    
   0.00000000    
   0.00000000    
   0.00000000    
   0.00000000    
   0.00000000    
   0.00000000    
   0.00000000    
   0.00000000    
   0.00000000    
   0.00000000    
   0.00000000    
   0.00000000    
   0.00000000    
   0.00000000    
   0.00000000    
   0.00000000    
   0.00000000    
   0.00000000    
   0.00000000    
   0.00000000    
   0.00000000    
   0.00000000    
   0.00000000    
   0.00000000    
   0.00000000    
   0.00000000    
   0.00000000    
   0.00000000    
   0.00000000    
   0.00000000    
   0.00000000    
   0.00000000    
   0.00000000    
   0.00000000    
   0.00000000    
   0.00000000    
   0.00000000    
   0.00000000    
   0.00000000    
   0.00000000    
   0.00000000    
   0.00000000    
   0.00000000    
   0.00000000    
   0.00000000    
   0.00000000    
   0.00000000    
   0.00000000    
   0.00000000    
   0.00000000    
   0.00000000    
   0.00000000    
   0.00000000    
   0.00000000    
   0.00000000    
   0.00000000    
   0.00000000    
   0.00000000    
   0.00000000    
   0.00000000    
   0.00000000    
   0.00000000    
   0.00000000    
   0.00000000    
   0.00000000    
   0.00000000    
   0.00000000    
   0.00000000    
   0.00000000    
   0.00000000    
   0.00000000    
   0.00000000    
   0.00000000    
   0.00000000    
   0.00000000    
   0.00000000    
   0.00000000    
   0.00000000    
   0.00000000    
   0.00000000    
   0.00000000    
   0.00000000    
   0.00000000    
   0.00000000    
   0.00000000    
   0.00000000    
   0.00000000    
   0.00000000    
   0.00000000    
   0.00000000    
   0.00000000    
   0.00000000    
   0.00000000    
   0.00000000    
   0.00000000    
   0.00000000    
   0.00000000    
   0.00000000    
   0.00000000    
   0.00000000    
   0.00000000    
   0.00000000    
   0.00000000    
   0.00000000    
   0.00000000    
   0.00000000    
   0.00000000    
   0.00000000    
   0.00000000    
   0.00000000    
   0.00000000    
   0.00000000    
   0.00000000    
   0.00000000    
   0.00000000    
   0.00000000    
   0.00000000    
   0.00000000    
   0.00000000    
   0.00000000    
   0.00000000    
   0.00000000    
   0.00000000    
   0.00000000    
   0.00000000    
   0.00000000    
   0.00000000    
   0.00000000    
   0.00000000    
   0.00000000    
   0.00000000    
   0.00000000    
   0.00000000    
   0.00000000    
   0.00000000    
   0.00000000    
   0.00000000    
   0.00000000    
   0.00000000    
   0.00000000    
   0.00000000    
   0.00000000    
   0.00000000    
   0.00000000    
   0.00000000    
   0.00000000    
   0.00000000    
   0.00000000    
   0.00000000    
   0.00000000    
   0.00000000    
   0.00000000    
   0.00000000    
   0.00000000    
   0.00000000    
   0.00000000    
   0.00000000    
   0.00000000    
   0.00000000    
   0.00000000    
   0.00000000    
   0.00000000    
   0.00000000    
   0.00000000    
   0.00000000    
   0.00000000    
   0.00000000    
   0.00000000    
   0.00000000    
   0.00000000    
   0.00000000    
   0.00000000    
   0.00000000    
   0.00000000    
   0.00000000    
   0.00000000    
   0.00000000    
   0.00000000    
   0.00000000    
   0.00000000    
   0.00000000    
   0.00000000    
   0.00000000    
   0.00000000    
   0.00000000    
   0.00000000    
   0.00000000    
   0.00000000    
   0.00000000    
   0.00000000    
   0.00000000    
   0.00000000    
   0.00000000    
   0.00000000    
   0.00000000    
   0.00000000    
   0.00000000    
   0.00000000    
   0.00000000    
   0.00000000    
   0.00000000    
   0.00000000    
   0.00000000    
   0.00000000    
   0.00000000    
   0.00000000    
   0.00000000    
   0.00000000    
   0.00000000    
   0.00000000    
   0.00000000    
   0.00000000    
   0.00000000    
   0.00000000    
   0.00000000    
   0.00000000    
   0.00000000    
   0.00000000    
   0.00000000    
   0.00000000    
   0.00000000    
   0.00000000    
   0.00000000    
   0.00000000    
   0.00000000    
   0.00000000    
   0.00000000    
   0.00000000    
   0.00000000    
   0.00000000    
   0.00000000    
   0.00000000    
   0.00000000    
   0.00000000    
   0.00000000    
   0.00000000    
   0.00000000    
   0.00000000    
   0.00000000    
   0.00000000    
   0.00000000    
   0.00000000    
   0.00000000    
   0.00000000    
   0.00000000    
   0.00000000    
   0.00000000    
   0.00000000    
   0.00000000    
   0.00000000    
   0.00000000    
   0.00000000    
   0.00000000    
   0.00000000    
   0.00000000    
   0.00000000    
   0.00000000    
   0.00000000    
   0.00000000    
   0.00000000    
   0.00000000    
   0.00000000    
   0.00000000    
   0.00000000    
   0.00000000    
   0.00000000    
   0.00000000    
   0.00000000    
   0.00000000    
   0.00000000    
   0.00000000    
   0.00000000    
   0.00000000    
   0.00000000    
   0.00000000    
   0.00000000    
   0.00000000    
   0.00000000    
   0.00000000    
   0.00000000    
   0.00000000    
   0.00000000    
   0.00000000    
   0.00000000    
   0.00000000    
   0.00000000    
   0.00000000    
   0.00000000    
   0.00000000    
   0.00000000    
   0.00000000    
   0.00000000    
   0.00000000    
   0.00000000    
   0.00000000    
   0.00000000    
   0.00000000    
   0.00000000    
   0.00000000    
   0.00000000    
   0.00000000    
   0.00000000    
   0.00000000    
   0.00000000    
   0.00000000    
   0.00000000    
   0.00000000    
   0.00000000    
   0.00000000    
   0.00000000    
   0.00000000    
   0.00000000    
   0.00000000    
   0.00000000    
   0.00000000    
   0.00000000    
   0.00000000    
   0.00000000    
   0.00000000    
   0.00000000    
   0.00000000    
   0.00000000    
   0.00000000    
   0.00000000    
   0.00000000    
   0.00000000    
   0.00000000    
   0.00000000    
   0.00000000    
   0.00000000    
   0.00000000    
   0.00000000    
   0.00000000    
   0.00000000    
   0.00000000    
   0.00000000    
   0.00000000    
   0.00000000    
   0.00000000    
   0.00000000    
   0.00000000    
   0.00000000    
   0.00000000    
   0.00000000    
   0.00000000    
   0.00000000    
   0.00000000    
   0.00000000    
   0.00000000    
   0.00000000    
   0.00000000    
   0.00000000    
   0.00000000    
   0.00000000    
   0.00000000    
   0.00000000    
   0.00000000    
   0.00000000    
   0.00000000    
   0.00000000    
   0.00000000    
   0.00000000    
   0.00000000    
   0.00000000    
   0.00000000    
   0.00000000    
   0.00000000    
   0.00000000    
   0.00000000    
   0.00000000    
   0.00000000    
   0.00000000    
   0.00000000    
   0.00000000    
   0.00000000    
   0.00000000    
   0.00000000    
   0.00000000    
   0.00000000    
   0.00000000    
   0.00000000    
   0.00000000    
   0.00000000    
   0.00000000    
   0.00000000    
   0.00000000    
   0.00000000    
   0.00000000    
   0.00000000    
   0.00000000    
   0.00000000    
   0.00000000    
   0.00000000    
   0.00000000    
   0.00000000    
   0.00000000    
   0.00000000    
   0.00000000    
   0.00000000    
   0.00000000    
   0.00000000    
   0.00000000    
   0.00000000    
   0.00000000    
   0.00000000    
   0.00000000    
   0.00000000    
   0.00000000    
   0.00000000    
   0.00000000    
   0.00000000    
   0.00000000    
   0.00000000    
   0.00000000    
   0.00000000    
   0.00000000    
   0.00000000    
   0.00000000    
   0.00000000    
   0.00000000    
   0.00000000    
   0.00000000    
   0.00000000    
   0.00000000    
   0.00000000    
   0.00000000    
   0.00000000    
   0.00000000    
   0.00000000    
   0.00000000    
   0.00000000    
   0.00000000    
   0.00000000    
   0.00000000    
   0.00000000    
   0.00000000    
   0.00000000    
   0.00000000    
   0.00000000    
   0.00000000    
   0.00000000    
   0.00000000    
   0.00000000    
   0.00000000    
   0.00000000    
   0.00000000    
   0.00000000    
   0.00000000    
   0.00000000    
   0.00000000    
   0.00000000    
   0.00000000    
   0.00000000    
   0.00000000    
   0.00000000    
   0.00000000    
   0.00000000    
   0.00000000    
   0.00000000    
   0.00000000    
   0.00000000    
   0.00000000    
   0.00000000    
   0.00000000    
   0.00000000    
   0.00000000    
   0.00000000    
   0.00000000    
   0.00000000    
   0.00000000    
   0.00000000    
   0.00000000    
   0.00000000    
   0.00000000    
   0.00000000    
   0.00000000    
   0.00000000    
   0.00000000    
   0.00000000    
   0.00000000    
   0.00000000    
   0.00000000    
   0.00000000    
   0.00000000    
   0.00000000    
   0.00000000    
   0.00000000    
   0.00000000    
   0.00000000    
   0.00000000    
   0.00000000    
   0.00000000    
   0.00000000    
   0.00000000    
   0.00000000    
   0.00000000    
   0.00000000    
   0.00000000    
   0.00000000    
   0.00000000    
   0.00000000    
   0.00000000    
   0.00000000    
   0.00000000    
   0.00000000    
   0.00000000    
   0.00000000    
   0.00000000    
   0.00000000    
   0.00000000    
   0.00000000    
   0.00000000    
   0.00000000    
   0.00000000    
   0.00000000    
   0.00000000    
   0.00000000    
   0.00000000    
   0.00000000    
   0.00000000    
   0.00000000    
   0.00000000    
   0.00000000    
   0.00000000    
   0.00000000    
   0.00000000    
   0.00000000    
   0.00000000    
   0.00000000    
   0.00000000    
   0.00000000    
   0.00000000    
   0.00000000    
   0.00000000    
   0.00000000    
   0.00000000    
   0.00000000    
   0.00000000    
   0.00000000    
   0.00000000    
   0.00000000    
   0.00000000    
   0.00000000    
   0.00000000    
   0.00000000    
   0.00000000    
   0.00000000    
   0.00000000    
   0.00000000    
   0.00000000    
   0.00000000    
   0.00000000    
   0.00000000    
   0.00000000    
   0.00000000    
   0.00000000    
   0.00000000    
   0.00000000    
   0.00000000    
   0.00000000    
   0.00000000    
   0.00000000    
   0.00000000    
   0.00000000    
   0.00000000    
   0.00000000    
   0.00000000    
   0.00000000    
   0.00000000    
   0.00000000    
   0.00000000    
   0.00000000    
   0.00000000    
   0.00000000    
   0.00000000    
   0.00000000    
   0.00000000    
   0.00000000    
   0.00000000    
   0.00000000    
   0.00000000    
   0.00000000    
   0.00000000    
   0.00000000    
   0.00000000    
   0.00000000    
   0.00000000    
   0.00000000    
   0.00000000    
   0.00000000    
   0.00000000    
   0.00000000    
   0.00000000    
   0.00000000    
   0.00000000    
   0.00000000    
   0.00000000    
   0.00000000    
   0.00000000    
   0.00000000    
   0.00000000    
   0.00000000    
   0.00000000    
   0.00000000    
   0.00000000    
   0.00000000    
   0.00000000    
   0.00000000    
   0.00000000    
   0.00000000    
   0.00000000    
   0.00000000    
   0.00000000    
   0.00000000    
   0.00000000    
   0.00000000    
   0.00000000    
   0.00000000    
   0.00000000    
   0.00000000    
   0.00000000    
   0.00000000    
   0.00000000    
   0.00000000    
   0.00000000    
   0.00000000    
   0.00000000    
   0.00000000    
   0.00000000    
   0.00000000    
   0.00000000    
   0.00000000    
   0.00000000    
   0.00000000    
   0.00000000    
   0.00000000    
   0.00000000    
   0.00000000    
   0.00000000    
   0.00000000    
   0.00000000    
   0.00000000    
   0.00000000    
   0.00000000    
   0.00000000    
   0.00000000    
   0.00000000    
   0.00000000    
   0.00000000    
   0.00000000    
   0.00000000    
   0.00000000    
   0.00000000    
   0.00000000    
   0.00000000    
   0.00000000    
   0.00000000    
   0.00000000    
   0.00000000    
   0.00000000    
   0.00000000    
   0.00000000    
   0.00000000    
   0.00000000    
   0.00000000    
   0.00000000    
   0.00000000    
   0.00000000    
   0.00000000    
   0.00000000    
   0.00000000    
   0.00000000    
   0.00000000    
   0.00000000    
   0.00000000    
   0.00000000    
   0.00000000    
   0.00000000    
   0.00000000    
   0.00000000    
   0.00000000    
   0.00000000    
   0.00000000    
   0.00000000    
   0.00000000    
   0.00000000    
   0.00000000    
   0.00000000    
   0.00000000    
   0.00000000    
   0.00000000    
   0.00000000    
   0.00000000    
   0.00000000    
   0.00000000    
   0.00000000    
   0.00000000    
   0.00000000    
   0.00000000    
   0.00000000    
   0.00000000    
   0.00000000    
   0.00000000    
   0.00000000    
   0.00000000    
   0.00000000    
   0.00000000    
   0.00000000    
   0.00000000    
   0.00000000    
   0.00000000    
   0.00000000    
   0.00000000    
   0.00000000    
   0.00000000    
   0.00000000    
   0.00000000    
   0.00000000    
   0.00000000    
   0.00000000    
   0.00000000    
   0.00000000    
   0.00000000    
   0.00000000    
   0.00000000    
   0.00000000    
   0.00000000    
   0.00000000    
   0.00000000    
   0.00000000    
   0.00000000    
   0.00000000    
   0.00000000    
   0.00000000    
   0.00000000    
   0.00000000    
   0.00000000    
   0.00000000    
   0.00000000    
   0.00000000    
   0.00000000    
   0.00000000    
   0.00000000    
   0.00000000    
   0.00000000    
   0.00000000    
   0.00000000    
   0.00000000    
   0.00000000    
   0.00000000    
   0.00000000    
   0.00000000    
   0.00000000    
   0.00000000    
   0.00000000    
   0.00000000    
   0.00000000    
   0.00000000    
   0.00000000    
   0.00000000    
   0.00000000    
   0.00000000    
   0.00000000    
   0.00000000    
   0.00000000    
   0.00000000    
   0.00000000    
   0.00000000    
   0.00000000    
   0.00000000    
   0.00000000    
   0.00000000    
   0.00000000    
   0.00000000    
   0.00000000    
   0.00000000    
   0.00000000    
   0.00000000    
   0.00000000    
   0.00000000    
   0.00000000    
   0.00000000    
   0.00000000    
   0.00000000    
   0.00000000    
   0.00000000    
   0.00000000    
   0.00000000    
   0.00000000    
   0.00000000    
   0.00000000    
   0.00000000    
   0.00000000    
   0.00000000    
   0.00000000    
   0.00000000    
   0.00000000    
   0.00000000    
   0.00000000    
   0.00000000    
   0.00000000    
   0.00000000    
   0.00000000    
   0.00000000    
   0.00000000    
   0.00000000    
   0.00000000    
   0.00000000    
   0.00000000    
   0.00000000    
   0.00000000    
   0.00000000    
   0.00000000    
   0.00000000    
   0.00000000    
   0.00000000    
   0.00000000    
   0.00000000    
   0.00000000    
   0.00000000    
   0.00000000    
   0.00000000    
   0.00000000    
   0.00000000    
   0.00000000    
   0.00000000    
   0.00000000    
   0.00000000    
   0.00000000    
   0.00000000    
   0.00000000    
   0.00000000    
   0.00000000    
   0.00000000    
   0.00000000    
   0.00000000    
   0.00000000    
   0.00000000    
   0.00000000    
   0.00000000    
   0.00000000    
   0.00000000    
   0.00000000    
   0.00000000    
   0.00000000    
   0.00000000    
   0.00000000    
   0.00000000    
   0.00000000    
   0.00000000    
   0.00000000    
   0.00000000    
   0.00000000    
   0.00000000    
   0.00000000    
   0.00000000    
   0.00000000    
   0.00000000    
   0.00000000    
   0.00000000    
   0.00000000    
   0.00000000    
   0.00000000    
   0.00000000    
   0.00000000    
   0.00000000    
   0.00000000    
   0.00000000    
   0.00000000    
   0.00000000    
   0.00000000    
   0.00000000    
   0.00000000    
   0.00000000    
   0.00000000    
   0.00000000    
   0.00000000    
   0.00000000    
   0.00000000    
   0.00000000    
   0.00000000    
   0.00000000    
   0.00000000    
   0.00000000    
   0.00000000    
   0.00000000    
   0.00000000    
   0.00000000    
   0.00000000    
   0.00000000    
   0.00000000    
   0.00000000    
   0.00000000    
   0.00000000    
   0.00000000    
   0.00000000    
   0.00000000    
   0.00000000    
   0.00000000    
   0.00000000    
   0.00000000    
   0.00000000    
   0.00000000    
   0.00000000    
   0.00000000    
   0.00000000    
   0.00000000    
   0.00000000    
   0.00000000    
   0.00000000    
   0.00000000    
   0.00000000    
   0.00000000    
   0.00000000    
   0.00000000    
   0.00000000    
   0.00000000    
   0.00000000    
   0.00000000    
   0.00000000    
   0.00000000    
   0.00000000    
   0.00000000    
   0.00000000    
   0.00000000    
   0.00000000    
   0.00000000    
   0.00000000    
   0.00000000    
   0.00000000    
   0.00000000    
   0.00000000    
   0.00000000    
   0.00000000    
   0.00000000    
   0.00000000    
   0.00000000    
   0.00000000    
   0.00000000    
   0.00000000    
   0.00000000    
   0.00000000    
   0.00000000    
   0.00000000    
   0.00000000    
   0.00000000    
   0.00000000    
   0.00000000    
   0.00000000    
   0.00000000    
   0.00000000    
   0.00000000    
   0.00000000    
   0.00000000    
   0.00000000    
   0.00000000    
   0.00000000    
   0.00000000    
   0.00000000    
   0.00000000    
   0.00000000    
   0.00000000    
   0.00000000    
   0.00000000    
   0.00000000    
   0.00000000    
   0.00000000    
   0.00000000    
   0.00000000    
   0.00000000    
   0.00000000    
   0.00000000    
   0.00000000    
   0.00000000    
   0.00000000    
   0.00000000    
   0.00000000    
   0.00000000    
   0.00000000    
   0.00000000    
   0.00000000    
   0.00000000    
   0.00000000    
   0.00000000    
   0.00000000    
   0.00000000    
   0.00000000    
   0.00000000    
   0.00000000    
   0.00000000    
   0.00000000    
   0.00000000    
   0.00000000    
   0.00000000    
   0.00000000    
   0.00000000    
   0.00000000    
   0.00000000    
   0.00000000    
   0.00000000    
   0.00000000    
   0.00000000    
   0.00000000    
   0.00000000    
   0.00000000    
   0.00000000    
   0.00000000    
   0.00000000    
   0.00000000    
   0.00000000    
   0.00000000    
   0.00000000    
   0.00000000    
   0.00000000    
   0.00000000    
   0.00000000    
   0.00000000    
   0.00000000    
   0.00000000    
   0.00000000    
   0.00000000    
   0.00000000    
   0.00000000    
   0.00000000    
   0.00000000    
   0.00000000    
   0.00000000    
   0.00000000    
   0.00000000    
   0.00000000    
   0.00000000    
   0.00000000    
   0.00000000    
   0.00000000    
   0.00000000    
   0.00000000    
   0.00000000    
   0.00000000    
   0.00000000    
   0.00000000    
   0.00000000    
   0.00000000    
   0.00000000    
   0.00000000    
   0.00000000    
   0.00000000    
   0.00000000    
   0.00000000    
   0.00000000    
   0.00000000    
   0.00000000    
   0.00000000    
   0.00000000    
   0.00000000    
   0.00000000    
   0.00000000    
   0.00000000    
   0.00000000    
   0.00000000    
   0.00000000    
   0.00000000    
   0.00000000    
   0.00000000    
   0.00000000    
   0.00000000    
   0.00000000    
   0.00000000    
   0.00000000    
   0.00000000    
   0.00000000    
   0.00000000    
   0.00000000    
   0.00000000    
   0.00000000    
   0.00000000    
   0.00000000    
   0.00000000    
   0.00000000    
   0.00000000    
   0.00000000    
   0.00000000    
   0.00000000    
   0.00000000    
   0.00000000    
   0.00000000    
   0.00000000    
   0.00000000    
   0.00000000    
   0.00000000    
   0.00000000    
   0.00000000    
   0.00000000    
   0.00000000    
   0.00000000    
   0.00000000    
   0.00000000    
   0.00000000    
   0.00000000    
   0.00000000    
   0.00000000    
   0.00000000    
   0.00000000    
   0.00000000    
   0.00000000    
   0.00000000    
   0.00000000    
   0.00000000    
   0.00000000    
   0.00000000    
   0.00000000    
   0.00000000    
   0.00000000    
   0.00000000    
   0.00000000    
   0.00000000    
   0.00000000    
   0.00000000    
   0.00000000    
   0.00000000    
   0.00000000    
   0.00000000    
   0.00000000    
   0.00000000    
   0.00000000    
   0.00000000    
   0.00000000    
   0.00000000    
   0.00000000    
   0.00000000    
   0.00000000    
   0.00000000    
   0.00000000    
   0.00000000    
   0.00000000    
   0.00000000    
   0.00000000    
   0.00000000    
   0.00000000    
   0.00000000    
   0.00000000    
   0.00000000    
   0.00000000    
   0.00000000    
   0.00000000    
   0.00000000    
   0.00000000    
   0.00000000    
   0.00000000    
   0.00000000    
   0.00000000    
   0.00000000    
   0.00000000    
   0.00000000    
   0.00000000    
   0.00000000    
   0.00000000    
   0.00000000    
   0.00000000    
   0.00000000    
   0.00000000    
   0.00000000    
   0.00000000    
   0.00000000    
   0.00000000    
   0.00000000    
   0.00000000    
   0.00000000    
   0.00000000    
   0.00000000    
   0.00000000    
   0.00000000    
   0.00000000    
   0.00000000    
   0.00000000    
   0.00000000    
   0.00000000    
   0.00000000    
   0.00000000    
   0.00000000    
   0.00000000    
   0.00000000    
   0.00000000    
   0.00000000    
   0.00000000    
   0.00000000    
   0.00000000    
   0.00000000    
   0.00000000    
   0.00000000    
   0.00000000    
   0.00000000    
   0.00000000    
   0.00000000    
   0.00000000    
   0.00000000    
   0.00000000    
   0.00000000    
   0.00000000    
   0.00000000    
   0.00000000    
   0.00000000    
   0.00000000    
   0.00000000    
   0.00000000    
   0.00000000    
   0.00000000    
   0.00000000    
   0.00000000    
   0.00000000    
   0.00000000    
   0.00000000    
   0.00000000    
   0.00000000    
   0.00000000    
   0.00000000    
   0.00000000    
   0.00000000    
   0.00000000    
   0.00000000    
   0.00000000    
   0.00000000    
   0.00000000    
   0.00000000    
   0.00000000    
   0.00000000    
   0.00000000    
   0.00000000    
   0.00000000    
   0.00000000    
   0.00000000    
   0.00000000    
   0.00000000    
   0.00000000    
   0.00000000    
   0.00000000    
   0.00000000    
   0.00000000    
   0.00000000    
   0.00000000    
   0.00000000    
   0.00000000    
   0.00000000    
   0.00000000    
   0.00000000    
   0.00000000    
   0.00000000    
   0.00000000    
   0.00000000    
   0.00000000    
   0.00000000    
   0.00000000    
   0.00000000    
   0.00000000    
   0.00000000    
   0.00000000    
   0.00000000    
   0.00000000    
   0.00000000    
   0.00000000    
   0.00000000    
   0.00000000    
   0.00000000    
   0.00000000    
   0.00000000    
   0.00000000    
   0.00000000    
   0.00000000    
   0.00000000    
   0.00000000    
   0.00000000    
   0.00000000    
   0.00000000    
   0.00000000    
   0.00000000    
   0.00000000    
   0.00000000    
   0.00000000    
   0.00000000    
   0.00000000    
   0.00000000    
   0.00000000    
   0.00000000    
   0.00000000    
   0.00000000    
   0.00000000    
   0.00000000    
   0.00000000    
   0.00000000    
   0.00000000    
   0.00000000    
   0.00000000    
   0.00000000    
   0.00000000    
   0.00000000    
   0.00000000    
   0.00000000    
   0.00000000    
   0.00000000    
   0.00000000    
   0.00000000    
   0.00000000    
   0.00000000    
   0.00000000    
   0.00000000    
   0.00000000    
   0.00000000    
   0.00000000    
   0.00000000    
   0.00000000    
   0.00000000    
   0.00000000    
   0.00000000    
   0.00000000    
   0.00000000    
   0.00000000    
   0.00000000    
   0.00000000    
   0.00000000    
   0.00000000    
   0.00000000    
   0.00000000    
   0.00000000    
   0.00000000    
   0.00000000    
   0.00000000    
   0.00000000    
   0.00000000    
   0.00000000    
   0.00000000    
   0.00000000    
   0.00000000    
   0.00000000    
   0.00000000    
   0.00000000    
   0.00000000    
   0.00000000    
   0.00000000    
   0.00000000    
   0.00000000    
   0.00000000    
   0.00000000    
   0.00000000    
   0.00000000    
   0.00000000    
   0.00000000    
   0.00000000    
   0.00000000    
   0.00000000    
   0.00000000    
   0.00000000    
   0.00000000    
   0.00000000    
   0.00000000    
   0.00000000    
   0.00000000    
   0.00000000    
   0.00000000    
   0.00000000    
   0.00000000    
   0.00000000    
   0.00000000    
   0.00000000    
   0.00000000    
   0.00000000    
   0.00000000    
   0.00000000    
   0.00000000    
   0.00000000    
   0.00000000    
   0.00000000    
   0.00000000    
   0.00000000    
   0.00000000    
   0.00000000    
   0.00000000    
   0.00000000    
   0.00000000    
   0.00000000    
   0.00000000    
   0.00000000    
   0.00000000    
   0.00000000    
   0.00000000    
   0.00000000    
   0.00000000    
   0.00000000    
   0.00000000    
   0.00000000    
   0.00000000    
   0.00000000    
   0.00000000    
   0.00000000    
   0.00000000    
   0.00000000    
   0.00000000    
   0.00000000    
   0.00000000    
   0.00000000    
   0.00000000    
   0.00000000    
   0.00000000    
   0.00000000    
   0.00000000    
   0.00000000    
   0.00000000    
   0.00000000    
   0.00000000    
   0.00000000    
   0.00000000    
   0.00000000    
   0.00000000    
   0.00000000    
   0.00000000    
   0.00000000    
   0.00000000    
   0.00000000    
   0.00000000    
   0.00000000    
   0.00000000    
   0.00000000    
   0.00000000    
   0.00000000    
   0.00000000    
   0.00000000    
   0.00000000    
   0.00000000    
   0.00000000    
   0.00000000    
   0.00000000    
   0.00000000    
   0.00000000    
   0.00000000    
   0.00000000    
   0.00000000    
   0.00000000    
   0.00000000    
   0.00000000    
   0.00000000    
   0.00000000    
   0.00000000    
   0.00000000    
   0.00000000    
   0.00000000    
   0.00000000    
   0.00000000    
   0.00000000    
   0.00000000    
   0.00000000    
   0.00000000    
   0.00000000    
   0.00000000    
   0.00000000    
   0.00000000    
   0.00000000    
   0.00000000    
   0.00000000    
   0.00000000    
   0.00000000    
   0.00000000    
   0.00000000    
   0.00000000    
   0.00000000    
   0.00000000    
   0.00000000    
   0.00000000    
   0.00000000    
   0.00000000    
   0.00000000    
   0.00000000    
   0.00000000    
   0.00000000    
   0.00000000    
   0.00000000    
   0.00000000    
   0.00000000    
   0.00000000    
   0.00000000    
   0.00000000    
   0.00000000    
   0.00000000    
   0.00000000    
   0.00000000    
   0.00000000    
   0.00000000    
   0.00000000    
   0.00000000    
   0.00000000    
   0.00000000    
   0.00000000    
   0.00000000    
   0.00000000    
   0.00000000    
   0.00000000    
   0.00000000    
   0.00000000    
   0.00000000    
   0.00000000    
   0.00000000    
   0.00000000    
   0.00000000    
   0.00000000    
   0.00000000    
   0.00000000    
   0.00000000    
   0.00000000    
   0.00000000    
   0.00000000    
   0.00000000    
   0.00000000    
   0.00000000    
   0.00000000    
   0.00000000    
   0.00000000    
   0.00000000    
   0.00000000    
   0.00000000    
   0.00000000    
   0.00000000    
   0.00000000    
   0.00000000    
   0.00000000    
   0.00000000    
   0.00000000    
   0.00000000    
   0.00000000    
   0.00000000    
   0.00000000    
   0.00000000    
   0.00000000    
   0.00000000    
   0.00000000    
   0.00000000    
   0.00000000    
   0.00000000    
   0.00000000    
   0.00000000    
   0.00000000    
   0.00000000    
   0.00000000    
   0.00000000    
   0.00000000    
   0.00000000    
   0.00000000    
   0.00000000    
   0.00000000    
   0.00000000    
   0.00000000    
   0.00000000    
   0.00000000    
   0.00000000    
   0.00000000    
   0.00000000    
   0.00000000    
   0.00000000    
   0.00000000    
   0.00000000    
   0.00000000    
   0.00000000    
   0.00000000    
   0.00000000    
   0.00000000    
   0.00000000    
   0.00000000    
   0.00000000    
   0.00000000    
   0.00000000    
   0.00000000    
   0.00000000    
   0.00000000    
   0.00000000    
   0.00000000    
   0.00000000    
   0.00000000    
   0.00000000    
   0.00000000    
   0.00000000    
   0.00000000    
   0.00000000    
   0.00000000    
   0.00000000    
   0.00000000    
   0.00000000    
   0.00000000    
   0.00000000    
   0.00000000    
   0.00000000    
   0.00000000    
   0.00000000    
   0.00000000    
   0.00000000    
   0.00000000    
   0.00000000    
   0.00000000    
   0.00000000    
   0.00000000    
   0.00000000    
   0.00000000    
   0.00000000    
   0.00000000    
   0.00000000    
   0.00000000    
   0.00000000    
   0.00000000    
   0.00000000    
   0.00000000    
   0.00000000    
   0.00000000    
   0.00000000    
   0.00000000    
   0.00000000    
   0.00000000    
   0.00000000    
   0.00000000    
   0.00000000    
   0.00000000    
   0.00000000    
   0.00000000    
   0.00000000    
   0.00000000    
   0.00000000    
   0.00000000    
   0.00000000    
   0.00000000    
   0.00000000    
   0.00000000    
   0.00000000    
   0.00000000    
   0.00000000    
   0.00000000    
   0.00000000    
   0.00000000    
   0.00000000    
   0.00000000    
   0.00000000    
   0.00000000    
   0.00000000    
   0.00000000    
   0.00000000    
   0.00000000    
   0.00000000    
   0.00000000    
   0.00000000    
   0.00000000    
   0.00000000    
   0.00000000    
   0.00000000    
   0.00000000    
   0.00000000    
   0.00000000    
   0.00000000    
   0.00000000    
   0.00000000    
   0.00000000    
   0.00000000    
   0.00000000    
   0.00000000    
   0.00000000    
   0.00000000    
   0.00000000    
   0.00000000    
   0.00000000    
   0.00000000    
   0.00000000    
   0.00000000    
   0.00000000    
   0.00000000    
   0.00000000    
   0.00000000    
   0.00000000    
   0.00000000    
   0.00000000    
   0.00000000    
   0.00000000    
   0.00000000    
   0.00000000    
   0.00000000    
   0.00000000    
   0.00000000    
   0.00000000    
   0.00000000    
   0.00000000    
   0.00000000    
   0.00000000    
   0.00000000    
   0.00000000    
   0.00000000    
   0.00000000    
   0.00000000    
   0.00000000    
   0.00000000    
   0.00000000    
   0.00000000    
   0.00000000    
   0.00000000    
   0.00000000    
   0.00000000    
   0.00000000    
   0.00000000    
   0.00000000    
   0.00000000    
   0.00000000    
   0.00000000    
   0.00000000    
   0.00000000    
   0.00000000    
   0.00000000    
   0.00000000    
   0.00000000    
   0.00000000    
   0.00000000    
   0.00000000    
   0.00000000    
   0.00000000    
   0.00000000    
   0.00000000    
   0.00000000    
   0.00000000    
   0.00000000    
   0.00000000    
   0.00000000    
   0.00000000    
   0.00000000    
   0.00000000    
   0.00000000    
   0.00000000    
   0.00000000    
   0.00000000    
   0.00000000    
   0.00000000    
   0.00000000    
   0.00000000    
   0.00000000    
   0.00000000    
   0.00000000    
   0.00000000    
   0.00000000    
   0.00000000    
   0.00000000    
   0.00000000    
   0.00000000    
   0.00000000    
   0.00000000    
   0.00000000    
   0.00000000    
   0.00000000    
   0.00000000    
   0.00000000    
   0.00000000    
   0.00000000    
   0.00000000    
   0.00000000    
   0.00000000    
   0.00000000    
   0.00000000    
   0.00000000    
   0.00000000    
   0.00000000    
   0.00000000    
   0.00000000    
   0.00000000    
   0.00000000    
   0.00000000    
   0.00000000    
   0.00000000    
   0.00000000    
   0.00000000    
   0.00000000    
   0.00000000    
   0.00000000    
   0.00000000    
   0.00000000    
   0.00000000    
   0.00000000    
   0.00000000    
   0.00000000    
   0.00000000    
   0.00000000    
   0.00000000    
   0.00000000    
   0.00000000    
   0.00000000    
   0.00000000    
   0.00000000    
   0.00000000    
   0.00000000    
   0.00000000    
   0.00000000    
   0.00000000    
   0.00000000    
   0.00000000    
   0.00000000    
   0.00000000    
   0.00000000    
   0.00000000    
   0.00000000    
   0.00000000    
   0.00000000    
   0.00000000    
   0.00000000    
   0.00000000    
   0.00000000    
   0.00000000    
   0.00000000    
   0.00000000    
   0.00000000    
   0.00000000    
   0.00000000    
   0.00000000    
   0.00000000    
   0.00000000    
   0.00000000    
   0.00000000    
   0.00000000    
   0.00000000    
   0.00000000    
   0.00000000    
   0.00000000    
   0.00000000    
   0.00000000    
   0.00000000    
   0.00000000    
   0.00000000    
   0.00000000    
   0.00000000    
   0.00000000    
   1.00000000    
   0.00000000    
   1.00000000    
   0.00000000    
   0.00000000    
   0.00000000    
   0.00000000    
   0.00000000    
   0.00000000    
   0.00000000    
   0.00000000    
   0.00000000    
   0.00000000    
   0.00000000    
   0.00000000    
   0.00000000    
   0.00000000    
   0.00000000    
   0.00000000    
   0.00000000    
   0.00000000    
   0.00000000    
   0.00000000    
   0.00000000    
   0.00000000    
   0.00000000    
   0.00000000    
   0.00000000    
   0.00000000    
   0.00000000    
   0.00000000    
   0.00000000    
   0.00000000    
   0.00000000    
   0.00000000    
   0.00000000    
   0.00000000    
   0.00000000    
   0.00000000    
   0.00000000    
   0.00000000    
   0.00000000    
   0.00000000    
   0.00000000    
   0.00000000    
   0.00000000    
   0.00000000    
   0.00000000    
   0.00000000    
   0.00000000    
   0.00000000    
   0.00000000    
   0.00000000    
   0.00000000    
   0.00000000    
   0.00000000    
   0.00000000    
   1.00000000    
   0.00000000    
   1.00000000    
   0.00000000    
   0.00000000    
   0.00000000    
   0.00000000    
   0.00000000    
   0.00000000    
   0.00000000    
   0.00000000    
   0.00000000    
   0.00000000    
   0.00000000    
   0.00000000    
   0.00000000    
   0.00000000    
   0.00000000    
   0.00000000    
   0.00000000    
   0.00000000    
   0.00000000    
   0.00000000    
   0.00000000    
   0.00000000    
   0.00000000    
   0.00000000    
   0.00000000    
   0.00000000    
   0.00000000    
   0.00000000    
   0.00000000    
   0.00000000    
   0.00000000    
   0.00000000    
   0.00000000    
   0.00000000    
   0.00000000    
   0.00000000    
   0.00000000    
   0.00000000    
   0.00000000    
   0.00000000    
   0.00000000    
   0.00000000    
   0.00000000    
   0.00000000    
   0.00000000    
   0.00000000    
   0.00000000    
   0.00000000    
   0.00000000    
   0.00000000    
   0.00000000    
   0.00000000    
   0.00000000    
   0.00000000    
   0.00000000    
   0.00000000    
   0.00000000    
   0.00000000    
   0.00000000    
   0.00000000    
   1.00000000    
   1.00000000    
   0.00000000    
   0.00000000    
   0.00000000    
   0.00000000    
   0.00000000    
   0.00000000    
   0.00000000    
   0.00000000    
   0.00000000    
   0.00000000    
   0.00000000    
   0.00000000    
   0.00000000    
   1.00000000    
   1.00000000    
   0.00000000    
   0.00000000    
   0.00000000    
   0.00000000    
   0.00000000    
   0.00000000    
   0.00000000    
   0.00000000    
   0.00000000    
   0.00000000    
   0.00000000    
   0.00000000    
   0.00000000    
   0.00000000    
   0.00000000    
   0.00000000    
   0.00000000    
   0.00000000    
   0.00000000    
   0.00000000    
   0.00000000    
   0.00000000    
   0.00000000    
   0.00000000    
   0.00000000    
   0.00000000    
   0.00000000    
   0.00000000    
   0.00000000    
   0.00000000    
   0.00000000    
   0.00000000    
   0.00000000    
   0.00000000    
   0.00000000    
   0.00000000    
   0.00000000    
   0.00000000    
   0.00000000    
   0.00000000    
   0.00000000    
   0.00000000    
   0.00000000    
   0.00000000    
   0.00000000    
   0.00000000    
   0.00000000    
   0.00000000    
   1.00000000    
   0.00000000    
   1.00000000    
   0.00000000    
   0.00000000    
   0.00000000    
   0.00000000    
   0.00000000    
   0.00000000    
   0.00000000    
   0.00000000    
   0.00000000    
   0.00000000    
   0.00000000    
   0.00000000    
   0.00000000    
   0.00000000    
   0.00000000    
   0.00000000    
   0.00000000    
   0.00000000    
   0.00000000    
   0.00000000    
   0.00000000    
   0.00000000    
   0.00000000    
   0.00000000    
   0.00000000    
   0.00000000    
   0.00000000    
   0.00000000    
   0.00000000    
   0.00000000    
   0.00000000    
   0.00000000    
   0.00000000    
   0.00000000    
   0.00000000    
   0.00000000    
   0.00000000    
   0.00000000    
   0.00000000    
   0.00000000    
   0.00000000    
   0.00000000    
   0.00000000    
   0.00000000    
   0.00000000    
   0.00000000    
   0.00000000    
   0.00000000    
   0.00000000    
   0.00000000    
   0.00000000    
   0.00000000    
   0.00000000    
   0.00000000    
   0.00000000    
   0.00000000    
   0.00000000    
   1.00000000    
   0.00000000    
   0.00000000    
   0.00000000    
   0.00000000    
   0.00000000    
   1.00000000    
   0.00000000    
   0.00000000    
   0.00000000    
   0.00000000    
   1.00000000    
   0.00000000    
   0.00000000    
   0.00000000    
   0.00000000    
   0.00000000    
   1.00000000    
   0.00000000    
   0.00000000    
   0.00000000    
   1.00000000    
   0.00000000    
   0.00000000    
   0.00000000    
   0.00000000    
   0.00000000    
   0.00000000    
   0.00000000    
   0.00000000    
   0.00000000    
   0.00000000    
   0.00000000    
   0.00000000    
   0.00000000    
   0.00000000    
   0.00000000    
   0.00000000    
   0.00000000    
   0.00000000    
   0.00000000    
   0.00000000    
   0.00000000    
   0.00000000    
   0.00000000    
   0.00000000    
   0.00000000    
   0.00000000    
   0.00000000    
   0.00000000    
   0.00000000    
   0.00000000    
   0.00000000    
   0.00000000    
   0.00000000    
   0.00000000    
   0.00000000    
   0.00000000    
   0.00000000    
   0.00000000    
   0.00000000    
   0.00000000    
   0.00000000    
   0.00000000    
   0.00000000    
   0.00000000    
   2.00000000    
   0.00000000    
   0.00000000    
   1.00000000    
   0.00000000    
   0.00000000    
   0.00000000    
   0.00000000    
   1.00000000    
   0.00000000    
   1.00000000    
   0.00000000    
   1.00000000    
   0.00000000    
   0.00000000    
   0.00000000    
   0.00000000    
   0.00000000    
   0.00000000    
   0.00000000    
   0.00000000    
   0.00000000    
   0.00000000    
   0.00000000    
   0.00000000    
   0.00000000    
   0.00000000    
   0.00000000    
   0.00000000    
   0.00000000    
   0.00000000    
   0.00000000    
   0.00000000    
   0.00000000    
   0.00000000    
   0.00000000    
   0.00000000    
   0.00000000    
   0.00000000    
   0.00000000    
   0.00000000    
   0.00000000    
   0.00000000    
   0.00000000    
   0.00000000    
   0.00000000    
   0.00000000    
   0.00000000    
   0.00000000    
   0.00000000    
   0.00000000    
   0.00000000    
   0.00000000    
   0.00000000    
   0.00000000    
   0.00000000    
   0.00000000    
   0.00000000    
   0.00000000    
   0.00000000    
   0.00000000    
   0.00000000    
   0.00000000    
   0.00000000    
   1.00000000    
   2.00000000    
   0.00000000    
   0.00000000    
   0.00000000    
   0.00000000    
   0.00000000    
   0.00000000    
   0.00000000    
   0.00000000    
   0.00000000    
   2.00000000    
   0.00000000    
   0.00000000    
   0.00000000    
   0.00000000    
   0.00000000    
   0.00000000    
   1.00000000    
   0.00000000    
   0.00000000    
   0.00000000    
   0.00000000    
   0.00000000    
   0.00000000    
   0.00000000    
   0.00000000    
   0.00000000    
   0.00000000    
   0.00000000    
   0.00000000    
   0.00000000    
   0.00000000    
   0.00000000    
   0.00000000    
   0.00000000    
   0.00000000    
   0.00000000    
   0.00000000    
   0.00000000    
   0.00000000    
   0.00000000    
   0.00000000    
   0.00000000    
   0.00000000    
   0.00000000    
   0.00000000    
   0.00000000    
   0.00000000    
   0.00000000    
   0.00000000    
   0.00000000    
   0.00000000    
   0.00000000    
   0.00000000    
   0.00000000    
   0.00000000    
   0.00000000    
   0.00000000    
   0.00000000    
   1.00000000    
   0.00000000    
   1.00000000    
   0.00000000    
   0.00000000    
   1.00000000    
   0.00000000    
   0.00000000    
   0.00000000    
   1.00000000    
   1.00000000    
   1.00000000    
   0.00000000    
   0.00000000    
   1.00000000    
   0.00000000    
   0.00000000    
   1.00000000    
   0.00000000    
   2.00000000    
   2.00000000    
   0.00000000    
   0.00000000    
   0.00000000    
   0.00000000    
   0.00000000    
   0.00000000    
   0.00000000    
   0.00000000    
   0.00000000    
   0.00000000    
   0.00000000    
   0.00000000    
   0.00000000    
   0.00000000    
   0.00000000    
   0.00000000    
   0.00000000    
   0.00000000    
   0.00000000    
   0.00000000    
   0.00000000    
   0.00000000    
   0.00000000    
   0.00000000    
   0.00000000    
   0.00000000    
   0.00000000    
   0.00000000    
   0.00000000    
   0.00000000    
   0.00000000    
   0.00000000    
   0.00000000    
   0.00000000    
   0.00000000    
   0.00000000    
   0.00000000    
   0.00000000    
   0.00000000    
   0.00000000    
   0.00000000    
   0.00000000    
   0.00000000    
   1.00000000    
   0.00000000    
   0.00000000    
   0.00000000    
   0.00000000    
   0.00000000    
   0.00000000    
   0.00000000    
   2.00000000    
   0.00000000    
   1.00000000    
   0.00000000    
   0.00000000    
   0.00000000    
   0.00000000    
   1.00000000    
   1.00000000    
   1.00000000    
   0.00000000    
   0.00000000    
   1.00000000    
   0.00000000    
   0.00000000    
   0.00000000    
   0.00000000    
   2.00000000    
   0.00000000    
   0.00000000    
   0.00000000    
   0.00000000    
   0.00000000    
   0.00000000    
   0.00000000    
   0.00000000    
   0.00000000    
   0.00000000    
   0.00000000    
   0.00000000    
   0.00000000    
   0.00000000    
   0.00000000    
   0.00000000    
   0.00000000    
   0.00000000    
   0.00000000    
   0.00000000    
   0.00000000    
   0.00000000    
   0.00000000    
   0.00000000    
   0.00000000    
   0.00000000    
   0.00000000    
   0.00000000    
   0.00000000    
   0.00000000    
   0.00000000    
   0.00000000    
   0.00000000    
   0.00000000    
   0.00000000    
   0.00000000    
   1.00000000    
   0.00000000    
   0.00000000    
   1.00000000    
   2.00000000    
   1.00000000    
   0.00000000    
   0.00000000    
   0.00000000    
   0.00000000    
   0.00000000    
   0.00000000    
   1.00000000    
   0.00000000    
   0.00000000    
   0.00000000    
   0.00000000    
   1.00000000    
   1.00000000    
   0.00000000    
   1.00000000    
   2.00000000    
   0.00000000    
   0.00000000    
   0.00000000    
   0.00000000    
   1.00000000    
   2.00000000    
   2.00000000    
   0.00000000    
   0.00000000    
   0.00000000    
   0.00000000    
   0.00000000    
   0.00000000    
   0.00000000    
   0.00000000    
   0.00000000    
   0.00000000    
   0.00000000    
   0.00000000    
   0.00000000    
   0.00000000    
   0.00000000    
   0.00000000    
   0.00000000    
   0.00000000    
   0.00000000    
   0.00000000    
   0.00000000    
   0.00000000    
   0.00000000    
   0.00000000    
   0.00000000    
   0.00000000    
   0.00000000    
   0.00000000    
   0.00000000    
   0.00000000    
   0.00000000    
   0.00000000    
   0.00000000    
   0.00000000    
   0.00000000    
   0.00000000    
   1.00000000    
   0.00000000    
   0.00000000    
   1.00000000    
   0.00000000    
   1.00000000    
   0.00000000    
   0.00000000    
   0.00000000    
   1.00000000    
   1.00000000    
   3.00000000    
   0.00000000    
   0.00000000    
   0.00000000    
   1.00000000    
   0.00000000    
   1.00000000    
   1.00000000    
   0.00000000    
   0.00000000    
   1.00000000    
   0.00000000    
   2.00000000    
   2.00000000    
   1.00000000    
   0.00000000    
   0.00000000    
   1.00000000    
   0.00000000    
   0.00000000    
   0.00000000    
   0.00000000    
   0.00000000    
   0.00000000    
   0.00000000    
   0.00000000    
   0.00000000    
   0.00000000    
   0.00000000    
   0.00000000    
   0.00000000    
   0.00000000    
   0.00000000    
   0.00000000    
   0.00000000    
   0.00000000    
   0.00000000    
   0.00000000    
   0.00000000    
   0.00000000    
   0.00000000    
   0.00000000    
   0.00000000    
   0.00000000    
   0.00000000    
   0.00000000    
   0.00000000    
   0.00000000    
   0.00000000    
   0.00000000    
   0.00000000    
   0.00000000    
   0.00000000    
   0.00000000    
   0.00000000    
   0.00000000    
   0.00000000    
   0.00000000    
   0.00000000    
   1.00000000    
   0.00000000    
   1.00000000    
   0.00000000    
   0.00000000    
   0.00000000    
   1.00000000    
   0.00000000    
   0.00000000    
   0.00000000    
   3.00000000    
   1.00000000    
   0.00000000    
   0.00000000    
   0.00000000    
   1.00000000    
   0.00000000    
   0.00000000    
   0.00000000    
   0.00000000    
   0.00000000    
   0.00000000    
   0.00000000    
   0.00000000    
   0.00000000    
   0.00000000    
   0.00000000    
   0.00000000    
   0.00000000    
   0.00000000    
   0.00000000    
   0.00000000    
   0.00000000    
   0.00000000    
   0.00000000    
   0.00000000    
   0.00000000    
   0.00000000    
   0.00000000    
   0.00000000    
   0.00000000    
   0.00000000    
   0.00000000    
   0.00000000    
   0.00000000    
   0.00000000    
   0.00000000    
   0.00000000    
   0.00000000    
   0.00000000    
   0.00000000    
   0.00000000    
   0.00000000    
   0.00000000    
   0.00000000    
   0.00000000    
   1.00000000    
   0.00000000    
   0.00000000    
   1.00000000    
   0.00000000    
   1.00000000    
   1.00000000    
   0.00000000    
   0.00000000    
   0.00000000    
   1.00000000    
   0.00000000    
   0.00000000    
   0.00000000    
   1.00000000    
   0.00000000    
   0.00000000    
   0.00000000    
   0.00000000    
   0.00000000    
   0.00000000    
   0.00000000    
   0.00000000    
   0.00000000    
   0.00000000    
   0.00000000    
   0.00000000    
   2.00000000    
   0.00000000    
   0.00000000    
   1.00000000    
   1.00000000    
   0.00000000    
   0.00000000    
   0.00000000    
   0.00000000    
   0.00000000    
   0.00000000    
   0.00000000    
   0.00000000    
   0.00000000    
   0.00000000    
   0.00000000    
   0.00000000    
   0.00000000    
   0.00000000    
   0.00000000    
   0.00000000    
   0.00000000    
   0.00000000    
   0.00000000    
   0.00000000    
   0.00000000    
   0.00000000    
   0.00000000    
   0.00000000    
   0.00000000    
   0.00000000    
   0.00000000    
   0.00000000    
   0.00000000    
   0.00000000    
   0.00000000    
   0.00000000    
   0.00000000    
   0.00000000    
   1.00000000    
   0.00000000    
   1.00000000    
   1.00000000    
   1.00000000    
   0.00000000    
   0.00000000    
   1.00000000    
   3.00000000    
   0.00000000    
   0.00000000    
   0.00000000    
   0.00000000    
   1.00000000    
   0.00000000    
   0.00000000    
   0.00000000    
   0.00000000    
   0.00000000    
   0.00000000    
   0.00000000    
   0.00000000    
   1.00000000    
   0.00000000    
   0.00000000    
   0.00000000    
   0.00000000    
   0.00000000    
   1.00000000    
   1.00000000    
   0.00000000    
   0.00000000    
   0.00000000    
   0.00000000    
   0.00000000    
   0.00000000    
   0.00000000    
   0.00000000    
   0.00000000    
   0.00000000    
   0.00000000    
   0.00000000    
   0.00000000    
   0.00000000    
   0.00000000    
   0.00000000    
   0.00000000    
   0.00000000    
   0.00000000    
   0.00000000    
   0.00000000    
   0.00000000    
   0.00000000    
   0.00000000    
   0.00000000    
   0.00000000    
   0.00000000    
   0.00000000    
   0.00000000    
   0.00000000    
   0.00000000    
   0.00000000    
   0.00000000    
   0.00000000    
   0.00000000    
   0.00000000    
   1.00000000    
   1.00000000    
   0.00000000    
   1.00000000    
   1.00000000    
   0.00000000    
   1.00000000    
   0.00000000    
   0.00000000    
   0.00000000    
   1.00000000    
   0.00000000    
   2.00000000    
   0.00000000    
   0.00000000    
   0.00000000    
   1.00000000    
   0.00000000    
   2.00000000    
   1.00000000    
   0.00000000    
   0.00000000    
   1.00000000    
   1.00000000    
   0.00000000    
   0.00000000    
   0.00000000    
   0.00000000    
   0.00000000    
   0.00000000    
   0.00000000    
   0.00000000    
   0.00000000    
   0.00000000    
   0.00000000    
   0.00000000    
   0.00000000    
   0.00000000    
   0.00000000    
   0.00000000    
   0.00000000    
   0.00000000    
   0.00000000    
   0.00000000    
   0.00000000    
   0.00000000    
   0.00000000    
   0.00000000    
   0.00000000    
   0.00000000    
   0.00000000    
   0.00000000    
   0.00000000    
   0.00000000    
   0.00000000    
   0.00000000    
   0.00000000    
   0.00000000    
   0.00000000    
   0.00000000    
   0.00000000    
   0.00000000    
   0.00000000    
   1.00000000    
   0.00000000    
   0.00000000    
   0.00000000    
   2.00000000    
   2.00000000    
   0.00000000    
   0.00000000    
   1.00000000    
   2.00000000    
   1.00000000    
   1.00000000    
   0.00000000    
   3.00000000    
   0.00000000    
   1.00000000    
   0.00000000    
   0.00000000    
   0.00000000    
   0.00000000    
   1.00000000    
   1.00000000    
   0.00000000    
   0.00000000    
   1.00000000    
   0.00000000    
   0.00000000    
   0.00000000    
   0.00000000    
   0.00000000    
   0.00000000    
   0.00000000    
   0.00000000    
   0.00000000    
   0.00000000    
   0.00000000    
   0.00000000    
   0.00000000    
   0.00000000    
   0.00000000    
   0.00000000    
   0.00000000    
   0.00000000    
   0.00000000    
   0.00000000    
   0.00000000    
   0.00000000    
   0.00000000    
   0.00000000    
   0.00000000    
   0.00000000    
   0.00000000    
   0.00000000    
   0.00000000    
   0.00000000    
   0.00000000    
   0.00000000    
   0.00000000    
   0.00000000    
   0.00000000    
   0.00000000    
   0.00000000    
   2.00000000    
   0.00000000    
   0.00000000    
   0.00000000    
   0.00000000    
   0.00000000    
   0.00000000    
   0.00000000    
   1.00000000    
   0.00000000    
   2.00000000    
   1.00000000    
   2.00000000    
   1.00000000    
   0.00000000    
   0.00000000    
   0.00000000    
   4.00000000    
   1.00000000    
   1.00000000    
   2.00000000    
   0.00000000    
   0.00000000    
   0.00000000    
   0.00000000    
   1.00000000    
   1.00000000    
   1.00000000    
   0.00000000    
   0.00000000    
   0.00000000    
   0.00000000    
   0.00000000    
   0.00000000    
   0.00000000    
   0.00000000    
   0.00000000    
   0.00000000    
   0.00000000    
   0.00000000    
   0.00000000    
   0.00000000    
   0.00000000    
   0.00000000    
   0.00000000    
   0.00000000    
   0.00000000    
   0.00000000    
   0.00000000    
   0.00000000    
   0.00000000    
   0.00000000    
   0.00000000    
   0.00000000    
   0.00000000    
   0.00000000    
   0.00000000    
   0.00000000    
   0.00000000    
   0.00000000    
   0.00000000    
   0.00000000    
   0.00000000    
   0.00000000    
   0.00000000    
   0.00000000    
   0.00000000    
   0.00000000    
   0.00000000    
   0.00000000    
   0.00000000    
   1.00000000    
   1.00000000    
   0.00000000    
   0.00000000    
   2.00000000    
   0.00000000    
   2.00000000    
   2.00000000    
   0.00000000    
   0.00000000    
   1.00000000    
   0.00000000    
   2.00000000    
   2.00000000    
   0.00000000    
   0.00000000    
   1.00000000    
   0.00000000    
   0.00000000    
   0.00000000    
   0.00000000    
   0.00000000    
   0.00000000    
   0.00000000    
   0.00000000    
   0.00000000    
   0.00000000    
   0.00000000    
   0.00000000    
   0.00000000    
   0.00000000    
   0.00000000    
   0.00000000    
   0.00000000    
   0.00000000    
   0.00000000    
   0.00000000    
   0.00000000    
   0.00000000    
   0.00000000    
   0.00000000    
   0.00000000    
   0.00000000    
   0.00000000    
   0.00000000    
   0.00000000    
   0.00000000    
   0.00000000    
   0.00000000    
   0.00000000    
   0.00000000    
   0.00000000    
   0.00000000    
   0.00000000    
   0.00000000    
   0.00000000    
   1.00000000    
   0.00000000    
   1.00000000    
   0.00000000    
   0.00000000    
   1.00000000    
   0.00000000    
   0.00000000    
   1.00000000    
   2.00000000    
   0.00000000    
   0.00000000    
   0.00000000    
   0.00000000    
   2.00000000    
   1.00000000    
   0.00000000    
   1.00000000    
   0.00000000    
   0.00000000    
   0.00000000    
   0.00000000    
   0.00000000    
   0.00000000    
   0.00000000    
   1.00000000    
   0.00000000    
   1.00000000    
   0.00000000    
   0.00000000    
   0.00000000    
   0.00000000    
   0.00000000    
   0.00000000    
   0.00000000    
   0.00000000    
   0.00000000    
   0.00000000    
   0.00000000    
   0.00000000    
   0.00000000    
   0.00000000    
   0.00000000    
   0.00000000    
   0.00000000    
   0.00000000    
   0.00000000    
   0.00000000    
   0.00000000    
   0.00000000    
   0.00000000    
   0.00000000    
   0.00000000    
   0.00000000    
   0.00000000    
   0.00000000    
   0.00000000    
   0.00000000    
   0.00000000    
   0.00000000    
   0.00000000    
   0.00000000    
   0.00000000    
   0.00000000    
   0.00000000    
   0.00000000    
   1.00000000    
   0.00000000    
   0.00000000    
   0.00000000    
   0.00000000    
   0.00000000    
   1.00000000    
   0.00000000    
   1.00000000    
   1.00000000    
   0.00000000    
   0.00000000    
   0.00000000    
   0.00000000    
   1.00000000    
   2.00000000    
   1.00000000    
   0.00000000    
   0.00000000    
   1.00000000    
   0.00000000    
   0.00000000    
   1.00000000    
   1.00000000    
   1.00000000    
   1.00000000    
   0.00000000    
   0.00000000    
   1.00000000    
   0.00000000    
   0.00000000    
   0.00000000    
   0.00000000    
   0.00000000    
   0.00000000    
   0.00000000    
   0.00000000    
   0.00000000    
   0.00000000    
   0.00000000    
   0.00000000    
   0.00000000    
   0.00000000    
   0.00000000    
   0.00000000    
   0.00000000    
   0.00000000    
   0.00000000    
   0.00000000    
   0.00000000    
   0.00000000    
   0.00000000    
   0.00000000    
   0.00000000    
   0.00000000    
   0.00000000    
   0.00000000    
   0.00000000    
   0.00000000    
   0.00000000    
   0.00000000    
   0.00000000    
   0.00000000    
   0.00000000    
   1.00000000    
   0.00000000    
   0.00000000    
   0.00000000    
   1.00000000    
   0.00000000    
   1.00000000    
   0.00000000    
   0.00000000    
   0.00000000    
   0.00000000    
   1.00000000    
   0.00000000    
   1.00000000    
   0.00000000    
   0.00000000    
   0.00000000    
   0.00000000    
   0.00000000    
   0.00000000    
   3.00000000    
   1.00000000    
   0.00000000    
   0.00000000    
   2.00000000    
   0.00000000    
   0.00000000    
   0.00000000    
   0.00000000    
   0.00000000    
   0.00000000    
   0.00000000    
   0.00000000    
   0.00000000    
   0.00000000    
   0.00000000    
   0.00000000    
   0.00000000    
   0.00000000    
   0.00000000    
   0.00000000    
   0.00000000    
   0.00000000    
   0.00000000    
   0.00000000    
   0.00000000    
   0.00000000    
   0.00000000    
   0.00000000    
   0.00000000    
   0.00000000    
   0.00000000    
   0.00000000    
   0.00000000    
   0.00000000    
   0.00000000    
   0.00000000    
   0.00000000    
   0.00000000    
   0.00000000    
   0.00000000    
   0.00000000    
   0.00000000    
   0.00000000    
   0.00000000    
   0.00000000    
   0.00000000    
   0.00000000    
   0.00000000    
   0.00000000    
   0.00000000    
   0.00000000    
   0.00000000    
   0.00000000    
   0.00000000    
   0.00000000    
   1.00000000    
   0.00000000    
   0.00000000    
   0.00000000    
   0.00000000    
   0.00000000    
   1.00000000    
   0.00000000    
   0.00000000    
   0.00000000    
   1.00000000    
   1.00000000    
   0.00000000    
   0.00000000    
   1.00000000    
   0.00000000    
   0.00000000    
   1.00000000    
   0.00000000    
   1.00000000    
   0.00000000    
   0.00000000    
   0.00000000    
   0.00000000    
   0.00000000    
   0.00000000    
   0.00000000    
   0.00000000    
   0.00000000    
   0.00000000    
   0.00000000    
   0.00000000    
   0.00000000    
   0.00000000    
   0.00000000    
   0.00000000    
   0.00000000    
   0.00000000    
   0.00000000    
   0.00000000    
   0.00000000    
   0.00000000    
   0.00000000    
   0.00000000    
   0.00000000    
   0.00000000    
   0.00000000    
   0.00000000    
   0.00000000    
   0.00000000    
   0.00000000    
   0.00000000    
   0.00000000    
   0.00000000    
   0.00000000    
   0.00000000    
   0.00000000    
   1.00000000    
   1.00000000    
   0.00000000    
   0.00000000    
   0.00000000    
   1.00000000    
   0.00000000    
   0.00000000    
   1.00000000    
   0.00000000    
   1.00000000    
   1.00000000    
   1.00000000    
   0.00000000    
   0.00000000    
   0.00000000    
   1.00000000    
   1.00000000    
   0.00000000    
   0.00000000    
   1.00000000    
   0.00000000    
   1.00000000    
   0.00000000    
   0.00000000    
   0.00000000    
   0.00000000    
   0.00000000    
   0.00000000    
   0.00000000    
   0.00000000    
   0.00000000    
   0.00000000    
   0.00000000    
   0.00000000    
   0.00000000    
   0.00000000    
   0.00000000    
   0.00000000    
   0.00000000    
   0.00000000    
   0.00000000    
   0.00000000    
   0.00000000    
   0.00000000    
   0.00000000    
   0.00000000    
   0.00000000    
   0.00000000    
   0.00000000    
   0.00000000    
   0.00000000    
   0.00000000    
   0.00000000    
   0.00000000    
   0.00000000    
   0.00000000    
   0.00000000    
   0.00000000    
   0.00000000    
   1.00000000    
   2.00000000    
   0.00000000    
   0.00000000    
   0.00000000    
   0.00000000    
   1.00000000    
   0.00000000    
   1.00000000    
   0.00000000    
   0.00000000    
   0.00000000    
   1.00000000    
   0.00000000    
   3.00000000    
   0.00000000    
   0.00000000    
   1.00000000    
   0.00000000    
   1.00000000    
   0.00000000    
   0.00000000    
   0.00000000    
   1.00000000    
   1.00000000    
   1.00000000    
   0.00000000    
   2.00000000    
   0.00000000    
   0.00000000    
   0.00000000    
   0.00000000    
   0.00000000    
   0.00000000    
   0.00000000    
   0.00000000    
   0.00000000    
   0.00000000    
   0.00000000    
   0.00000000    
   0.00000000    
   0.00000000    
   0.00000000    
   0.00000000    
   0.00000000    
   0.00000000    
   0.00000000    
   0.00000000    
   0.00000000    
   0.00000000    
   0.00000000    
   0.00000000    
   0.00000000    
   0.00000000    
   0.00000000    
   0.00000000    
   0.00000000    
   0.00000000    
   0.00000000    
   0.00000000    
   0.00000000    
   0.00000000    
   0.00000000    
   0.00000000    
   0.00000000    
   0.00000000    
   0.00000000    
   0.00000000    
   0.00000000    
   0.00000000    
   0.00000000    
   0.00000000    
   1.00000000    
   1.00000000    
   0.00000000    
   1.00000000    
   0.00000000    
   0.00000000    
   1.00000000    
   0.00000000    
   1.00000000    
   1.00000000    
   0.00000000    
   1.00000000    
   1.00000000    
   0.00000000    
   0.00000000    
   1.00000000    
   0.00000000    
   0.00000000    
   1.00000000    
   0.00000000    
   0.00000000    
   0.00000000    
   0.00000000    
   0.00000000    
   0.00000000    
   0.00000000    
   0.00000000    
   0.00000000    
   0.00000000    
   0.00000000    
   0.00000000    
   0.00000000    
   0.00000000    
   0.00000000    
   0.00000000    
   0.00000000    
   0.00000000    
   0.00000000    
   0.00000000    
   0.00000000    
   0.00000000    
   0.00000000    
   0.00000000    
   0.00000000    
   0.00000000    
   0.00000000    
   0.00000000    
   0.00000000    
   0.00000000    
   0.00000000    
   0.00000000    
   0.00000000    
   0.00000000    
   0.00000000    
   0.00000000    
   0.00000000    
   0.00000000    
   0.00000000    
   0.00000000    
   0.00000000    
   0.00000000    
   0.00000000    
   0.00000000    
   0.00000000    
   0.00000000    
   0.00000000    
   0.00000000    
   0.00000000    
   0.00000000    
   3.00000000    
   0.00000000    
   0.00000000    
   0.00000000    
   2.00000000    
   1.00000000    
   2.00000000    
   0.00000000    
   1.00000000    
   1.00000000    
   0.00000000    
   0.00000000    
   0.00000000    
   2.00000000    
   0.00000000    
   0.00000000    
   0.00000000    
   0.00000000    
   0.00000000    
   0.00000000    
   0.00000000    
   0.00000000    
   0.00000000    
   0.00000000    
   0.00000000    
   0.00000000    
   0.00000000    
   0.00000000    
   0.00000000    
   0.00000000    
   0.00000000    
   0.00000000    
   0.00000000    
   0.00000000    
   0.00000000    
   0.00000000    
   0.00000000    
   0.00000000    
   0.00000000    
   0.00000000    
   0.00000000    
   0.00000000    
   0.00000000    
   0.00000000    
   0.00000000    
   0.00000000    
   0.00000000    
   0.00000000    
   0.00000000    
   0.00000000    
   0.00000000    
   0.00000000    
   0.00000000    
   0.00000000    
   0.00000000    
   0.00000000    
   0.00000000    
   0.00000000    
   0.00000000    
   0.00000000    
   2.00000000    
   0.00000000    
   0.00000000    
   0.00000000    
   2.00000000    
   2.00000000    
   0.00000000    
   2.00000000    
   1.00000000    
   0.00000000    
   1.00000000    
   0.00000000    
   0.00000000    
   0.00000000    
   1.00000000    
   0.00000000    
   0.00000000    
   0.00000000    
   0.00000000    
   0.00000000    
   0.00000000    
   0.00000000    
   0.00000000    
   0.00000000    
   0.00000000    
   0.00000000    
   0.00000000    
   0.00000000    
   0.00000000    
   0.00000000    
   0.00000000    
   0.00000000    
   0.00000000    
   0.00000000    
   0.00000000    
   0.00000000    
   0.00000000    
   0.00000000    
   0.00000000    
   0.00000000    
   0.00000000    
   0.00000000    
   0.00000000    
   0.00000000    
   0.00000000    
   0.00000000    
   0.00000000    
   0.00000000    
   0.00000000    
   0.00000000    
   0.00000000    
   0.00000000    
   0.00000000    
   0.00000000    
   0.00000000    
   1.00000000    
   0.00000000    
   0.00000000    
   1.00000000    
   1.00000000    
   0.00000000    
   1.00000000    
   0.00000000    
   1.00000000    
   1.00000000    
   0.00000000    
   0.00000000    
   1.00000000    
   0.00000000    
   2.00000000    
   0.00000000    
   0.00000000    
   0.00000000    
   0.00000000    
   2.00000000    
   3.00000000    
   1.00000000    
   1.00000000    
   0.00000000    
   0.00000000    
   0.00000000    
   1.00000000    
   0.00000000    
   0.00000000    
   0.00000000    
   0.00000000    
   0.00000000    
   0.00000000    
   0.00000000    
   0.00000000    
   0.00000000    
   0.00000000    
   0.00000000    
   0.00000000    
   0.00000000    
   0.00000000    
   0.00000000    
   0.00000000    
   0.00000000    
   0.00000000    
   0.00000000    
   0.00000000    
   0.00000000    
   0.00000000    
   0.00000000    
   0.00000000    
   0.00000000    
   0.00000000    
   0.00000000    
   0.00000000    
   0.00000000    
   0.00000000    
   0.00000000    
   0.00000000    
   0.00000000    
   0.00000000    
   0.00000000    
   0.00000000    
   0.00000000    
   0.00000000    
   0.00000000    
   0.00000000    
   0.00000000    
   0.00000000    
   0.00000000    
   0.00000000    
   0.00000000    
   0.00000000    
   0.00000000    
   0.00000000    
   0.00000000    
   0.00000000    
   0.00000000    
   1.00000000    
   2.00000000    
   3.00000000    
   0.00000000    
   1.00000000    
   1.00000000    
   0.00000000    
   0.00000000    
   0.00000000    
   0.00000000    
   0.00000000    
   0.00000000    
   0.00000000    
   0.00000000    
   0.00000000    
   0.00000000    
   0.00000000    
   0.00000000    
   0.00000000    
   0.00000000    
   0.00000000    
   0.00000000    
   0.00000000    
   0.00000000    
   0.00000000    
   0.00000000    
   0.00000000    
   0.00000000    
   0.00000000    
   0.00000000    
   0.00000000    
   0.00000000    
   0.00000000    
   0.00000000    
   0.00000000    
   0.00000000    
   0.00000000    
   0.00000000    
   0.00000000    
   0.00000000    
   0.00000000    
   0.00000000    
   0.00000000    
   0.00000000    
   0.00000000    
   0.00000000    
   0.00000000    
   0.00000000    
   0.00000000    
   0.00000000    
   0.00000000    
   0.00000000    
   0.00000000    
   1.00000000    
   0.00000000    
   1.00000000    
   1.00000000    
   0.00000000    
   1.00000000    
   0.00000000    
   1.00000000    
   1.00000000    
   2.00000000    
   0.00000000    
   0.00000000    
   0.00000000    
   0.00000000    
   0.00000000    
   0.00000000    
   0.00000000    
   1.00000000    
   0.00000000    
   0.00000000    
   0.00000000    
   0.00000000    
   0.00000000    
   1.00000000    
   0.00000000    
   0.00000000    
   0.00000000    
   0.00000000    
   0.00000000    
   0.00000000    
   0.00000000    
   0.00000000    
   0.00000000    
   0.00000000    
   0.00000000    
   0.00000000    
   0.00000000    
   0.00000000    
   0.00000000    
   0.00000000    
   0.00000000    
   0.00000000    
   0.00000000    
   0.00000000    
   0.00000000    
   0.00000000    
   0.00000000    
   0.00000000    
   0.00000000    
   0.00000000    
   0.00000000    
   0.00000000    
   0.00000000    
   0.00000000    
   0.00000000    
   0.00000000    
   0.00000000    
   0.00000000    
   0.00000000    
   0.00000000    
   0.00000000    
   0.00000000    
   0.00000000    
   0.00000000    
   0.00000000    
   0.00000000    
   0.00000000    
   0.00000000    
   0.00000000    
   0.00000000    
   0.00000000    
   1.00000000    
   0.00000000    
   0.00000000    
   0.00000000    
   0.00000000    
   0.00000000    
   0.00000000    
   0.00000000    
   1.00000000    
   0.00000000    
   0.00000000    
   0.00000000    
   1.00000000    
   0.00000000    
   0.00000000    
   0.00000000    
   0.00000000    
   0.00000000    
   0.00000000    
   0.00000000    
   0.00000000    
   0.00000000    
   0.00000000    
   0.00000000    
   0.00000000    
   0.00000000    
   0.00000000    
   0.00000000    
   0.00000000    
   0.00000000    
   0.00000000    
   0.00000000    
   0.00000000    
   0.00000000    
   0.00000000    
   0.00000000    
   0.00000000    
   0.00000000    
   0.00000000    
   0.00000000    
   0.00000000    
   0.00000000    
   0.00000000    
   0.00000000    
   0.00000000    
   0.00000000    
   0.00000000    
   0.00000000    
   0.00000000    
   0.00000000    
   0.00000000    
   0.00000000    
   0.00000000    
   0.00000000    
   0.00000000    
   0.00000000    
   0.00000000    
   0.00000000    
   2.00000000    
   0.00000000    
   0.00000000    
   0.00000000    
   1.00000000    
   0.00000000    
   0.00000000    
   1.00000000    
   0.00000000    
   0.00000000    
   1.00000000    
   0.00000000    
   0.00000000    
   1.00000000    
   0.00000000    
   0.00000000    
   0.00000000    
   0.00000000    
   0.00000000    
   0.00000000    
   0.00000000    
   0.00000000    
   0.00000000    
   0.00000000    
   0.00000000    
   0.00000000    
   0.00000000    
   0.00000000    
   0.00000000    
   0.00000000    
   0.00000000    
   0.00000000    
   0.00000000    
   0.00000000    
   0.00000000    
   0.00000000    
   0.00000000    
   0.00000000    
   0.00000000    
   0.00000000    
   0.00000000    
   0.00000000    
   0.00000000    
   0.00000000    
   0.00000000    
   0.00000000    
   0.00000000    
   0.00000000    
   0.00000000    
   0.00000000    
   0.00000000    
   0.00000000    
   0.00000000    
   0.00000000    
   0.00000000    
   0.00000000    
   0.00000000    
   0.00000000    
   0.00000000    
   0.00000000    
   0.00000000    
   0.00000000    
   0.00000000    
   0.00000000    
   0.00000000    
   0.00000000    
   0.00000000    
   1.00000000    
   0.00000000    
   1.00000000    
   0.00000000    
   0.00000000    
   0.00000000    
   0.00000000    
   0.00000000    
   0.00000000    
   1.00000000    
   2.00000000    
   1.00000000    
   0.00000000    
   0.00000000    
   0.00000000    
   0.00000000    
   0.00000000    
   0.00000000    
   0.00000000    
   0.00000000    
   0.00000000    
   0.00000000    
   0.00000000    
   0.00000000    
   0.00000000    
   0.00000000    
   0.00000000    
   0.00000000    
   0.00000000    
   0.00000000    
   0.00000000    
   0.00000000    
   0.00000000    
   0.00000000    
   0.00000000    
   0.00000000    
   0.00000000    
   0.00000000    
   0.00000000    
   0.00000000    
   0.00000000    
   0.00000000    
   0.00000000    
   0.00000000    
   0.00000000    
   0.00000000    
   0.00000000    
   0.00000000    
   0.00000000    
   0.00000000    
   0.00000000    
   0.00000000    
   0.00000000    
   0.00000000    
   0.00000000    
   0.00000000    
   0.00000000    
   0.00000000    
   0.00000000    
   0.00000000    
   0.00000000    
   0.00000000    
   0.00000000    
   1.00000000    
   0.00000000    
   0.00000000    
   0.00000000    
   1.00000000    
   0.00000000    
   0.00000000    
   0.00000000    
   0.00000000    
   1.00000000    
   1.00000000    
   0.00000000    
   0.00000000    
   0.00000000    
   0.00000000    
   0.00000000    
   0.00000000    
   0.00000000    
   0.00000000    
   0.00000000    
   0.00000000    
   0.00000000    
   0.00000000    
   0.00000000    
   0.00000000    
   0.00000000    
   0.00000000    
   0.00000000    
   0.00000000    
   0.00000000    
   0.00000000    
   0.00000000    
   0.00000000    
   0.00000000    
   0.00000000    
   0.00000000    
   0.00000000    
   0.00000000    
   0.00000000    
   0.00000000    
   0.00000000    
   0.00000000    
   0.00000000    
   0.00000000    
   0.00000000    
   0.00000000    
   0.00000000    
   0.00000000    
   0.00000000    
   0.00000000    
   0.00000000    
   0.00000000    
   0.00000000    
   0.00000000    
   0.00000000    
   0.00000000    
   0.00000000    
   0.00000000    
   0.00000000    
   0.00000000    
   0.00000000    
   0.00000000    
   0.00000000    
   0.00000000    
   0.00000000    
   0.00000000    
   0.00000000    
   0.00000000    
   0.00000000    
   0.00000000    
   0.00000000    
   0.00000000    
   0.00000000    
   0.00000000    
   0.00000000    
   0.00000000    
   0.00000000    
   0.00000000    
   0.00000000    
   0.00000000    
   0.00000000    
   0.00000000    
   0.00000000    
   0.00000000    
   0.00000000    
   0.00000000    
   0.00000000    
   0.00000000    
   0.00000000    
   0.00000000    
   0.00000000    
   0.00000000    
   0.00000000    
   0.00000000    
   0.00000000    
   0.00000000    
   0.00000000    
   0.00000000    
   0.00000000    
   0.00000000    
   0.00000000    
   0.00000000    
   0.00000000    
   0.00000000    
   0.00000000    
   0.00000000    
   0.00000000    
   0.00000000    
   0.00000000    
   0.00000000    
   0.00000000    
   0.00000000    
   0.00000000    
   0.00000000    
   0.00000000    
   0.00000000    
   0.00000000    
   0.00000000    
   0.00000000    
   0.00000000    
   0.00000000    
   0.00000000    
   0.00000000    
   0.00000000    
   0.00000000    
   0.00000000    
   0.00000000    
   0.00000000    
   0.00000000    
   0.00000000    
   0.00000000    
   0.00000000    
   0.00000000    
   0.00000000    
   0.00000000    
   0.00000000    
   0.00000000    
   0.00000000    
   0.00000000    
   0.00000000    
   0.00000000    
   0.00000000    
   0.00000000    
   0.00000000    
   0.00000000    
   0.00000000    
   0.00000000    
   0.00000000    
   0.00000000    
   0.00000000    
   0.00000000    
   0.00000000    
   0.00000000    
   0.00000000    
   0.00000000    
   0.00000000    
   0.00000000    
   0.00000000    
   0.00000000    
   0.00000000    
   0.00000000    
   0.00000000    
   0.00000000    
   0.00000000    
   0.00000000    
   0.00000000    
   0.00000000    
   0.00000000    
   0.00000000    
   0.00000000    
   0.00000000    
   0.00000000    
   0.00000000    
   0.00000000    
   0.00000000    
   0.00000000    
   0.00000000    
   0.00000000    
   0.00000000    
   0.00000000    
   0.00000000    
   0.00000000    
   0.00000000    
   0.00000000    
   0.00000000    
   0.00000000    
   0.00000000    
   0.00000000    
   0.00000000    
   0.00000000    
   0.00000000    
   0.00000000    
   0.00000000    
   0.00000000    
   0.00000000    
   0.00000000    
   0.00000000    
   0.00000000    
   0.00000000    
   0.00000000    
   0.00000000    
   0.00000000    
   0.00000000    
   0.00000000    
   0.00000000    
   0.00000000    
   0.00000000    
   0.00000000    
   0.00000000    
   0.00000000    
   0.00000000    
   0.00000000    
   0.00000000    
   0.00000000    
   0.00000000    
   0.00000000    
   0.00000000    
   0.00000000    
   0.00000000    
   0.00000000    
   0.00000000    
   0.00000000    
   0.00000000    
   0.00000000    
   0.00000000    
   0.00000000    
   0.00000000    
   0.00000000    
   0.00000000    
   0.00000000    
   0.00000000    
   0.00000000    
   0.00000000    
   0.00000000    
   0.00000000    
   0.00000000    
   0.00000000    
   0.00000000    
   0.00000000    
   0.00000000    
   0.00000000    
   0.00000000    
   0.00000000    
   0.00000000    
   0.00000000    
   0.00000000    
   0.00000000    
   0.00000000    
   0.00000000    
   0.00000000    
   0.00000000    
   0.00000000    
   0.00000000    
   0.00000000    
   0.00000000    
   0.00000000    
   0.00000000    
   0.00000000    
   0.00000000    
   0.00000000    
   0.00000000    
   0.00000000    
   0.00000000    
   0.00000000    
   0.00000000    
   0.00000000    
   0.00000000    
   0.00000000    
   0.00000000    
   0.00000000    
   0.00000000    
   0.00000000    
   0.00000000    
   0.00000000    
   0.00000000    
   0.00000000    
   0.00000000    
   0.00000000    
   0.00000000    
   0.00000000    
   0.00000000    
   0.00000000    
   0.00000000    
   0.00000000    
   0.00000000    
   0.00000000    
   0.00000000    
   0.00000000    
   0.00000000    
   0.00000000    
   0.00000000    
   0.00000000    
   0.00000000    
   0.00000000    
   0.00000000    
   0.00000000    
   0.00000000    
   0.00000000    
   0.00000000    
   0.00000000    
   0.00000000    
   0.00000000    
   0.00000000    
   0.00000000    
   0.00000000    
   0.00000000    
   0.00000000    
   0.00000000    
   0.00000000    
   0.00000000    
   0.00000000    
   0.00000000    
   0.00000000    
   0.00000000    
   0.00000000    
   0.00000000    
   0.00000000    
   0.00000000    
   0.00000000    
   0.00000000    
   0.00000000    
   0.00000000    
   0.00000000    
   0.00000000    
   0.00000000    
   0.00000000    
   0.00000000    
   0.00000000    
   0.00000000    
   0.00000000    
   0.00000000    
   0.00000000    
   0.00000000    
   0.00000000    
   0.00000000    
   0.00000000    
   0.00000000    
   0.00000000    
   0.00000000    
   0.00000000    
   0.00000000    
   0.00000000    
   0.00000000    
   0.00000000    
   0.00000000    
   0.00000000    
   0.00000000    
   0.00000000    
   0.00000000    
   0.00000000    
   0.00000000    
   0.00000000    
   0.00000000    
   0.00000000    
   0.00000000    
   0.00000000    
   0.00000000    
   0.00000000    
   0.00000000    
   0.00000000    
   0.00000000    
   0.00000000    
   0.00000000    
   0.00000000    
   0.00000000    
   0.00000000    
   0.00000000    
   0.00000000    
   0.00000000    
   0.00000000    
   0.00000000    
   0.00000000    
   0.00000000    
   0.00000000    
   0.00000000    
   0.00000000    
   0.00000000    
   0.00000000    
   0.00000000    
   0.00000000    
   0.00000000    
   0.00000000    
   0.00000000    
   0.00000000    
   0.00000000    
   0.00000000    
   0.00000000    
   0.00000000    
   0.00000000    
   0.00000000    
   0.00000000    
   0.00000000    
   0.00000000    
   0.00000000    
   0.00000000    
   0.00000000    
   0.00000000    
   0.00000000    
   0.00000000    
   0.00000000    
   0.00000000    
   0.00000000    
   0.00000000    
   0.00000000    
   0.00000000    
   0.00000000    
   0.00000000    
   0.00000000    
   0.00000000    
   0.00000000    
   0.00000000    
   0.00000000    
   0.00000000    
   0.00000000    
   0.00000000    
   0.00000000    
   0.00000000    
   0.00000000    
   0.00000000    
   0.00000000    
   0.00000000    
   0.00000000    
   0.00000000    
   0.00000000    
   0.00000000    
   0.00000000    
   0.00000000    
   0.00000000    
   0.00000000    
   0.00000000    
   0.00000000    
   0.00000000    
   0.00000000    
   0.00000000    
   0.00000000    
   0.00000000    
   0.00000000    
   0.00000000    
   0.00000000    
   0.00000000    
   0.00000000    
   0.00000000    
   0.00000000    
   0.00000000    
   0.00000000    
   0.00000000    
   0.00000000    
   0.00000000    
   0.00000000    
   0.00000000    
   0.00000000    
   0.00000000    
   0.00000000    
   0.00000000    
   0.00000000    
   0.00000000    
   0.00000000    
   0.00000000    
   0.00000000    
   0.00000000    
   0.00000000    
   0.00000000    
   0.00000000    
   0.00000000    
   0.00000000    
   0.00000000    
   0.00000000    
   0.00000000    
   0.00000000    
   0.00000000    
   0.00000000    
   0.00000000    
   0.00000000    
   0.00000000    
   0.00000000    
   0.00000000    
   0.00000000    
   0.00000000    
   0.00000000    
   0.00000000    
   0.00000000    
   0.00000000    
   0.00000000    
   0.00000000    
   0.00000000    
   0.00000000    
   0.00000000    
   0.00000000    
   0.00000000    
   0.00000000    
   0.00000000    
   0.00000000    
   0.00000000    
   0.00000000    
   0.00000000    
   0.00000000    
   0.00000000    
   0.00000000    
   0.00000000    
   0.00000000    
   0.00000000    
   0.00000000    
   0.00000000    
   0.00000000    
   0.00000000    
   0.00000000    
   0.00000000    
   0.00000000    
   0.00000000    
   0.00000000    
   0.00000000    
   0.00000000    
   0.00000000    
   0.00000000    
   0.00000000    
   0.00000000    
   0.00000000    
   0.00000000    
   0.00000000    
   0.00000000    
   0.00000000    
   0.00000000    
   0.00000000    
   0.00000000    
   0.00000000    
   0.00000000    
   0.00000000    
   0.00000000    
   0.00000000    
   0.00000000    
   0.00000000    
   0.00000000    
   0.00000000    
   0.00000000    
   0.00000000    
   0.00000000    
   0.00000000    
   0.00000000    
   0.00000000    
   0.00000000    
   0.00000000    
   0.00000000    
   0.00000000    
   0.00000000    
   0.00000000    
   0.00000000    
   0.00000000    
   0.00000000    
   0.00000000    
   0.00000000    
   0.00000000    
   0.00000000    
   0.00000000    
   0.00000000    
   0.00000000    
   0.00000000    
   0.00000000    
   0.00000000    
   0.00000000    
   0.00000000    
   0.00000000    
   0.00000000    
   0.00000000    
   0.00000000    
   0.00000000    
   0.00000000    
   0.00000000    
   0.00000000    
   0.00000000    
   0.00000000    
   0.00000000    
   0.00000000    
   0.00000000    
   0.00000000    
   0.00000000    
   0.00000000    
   0.00000000    
   0.00000000    
   0.00000000    
   0.00000000    
   0.00000000    
   0.00000000    
   0.00000000    
   0.00000000    
   0.00000000    
   0.00000000    
   0.00000000    
   0.00000000    
   0.00000000    
   0.00000000    
   0.00000000    
   0.00000000    
   0.00000000    
   0.00000000    
   0.00000000    
   0.00000000    
   0.00000000    
   0.00000000    
   0.00000000    
   0.00000000    
   0.00000000    
   0.00000000    
   0.00000000    
   0.00000000    
   0.00000000    
   0.00000000    
   0.00000000    
   0.00000000    
   0.00000000    
   0.00000000    
   0.00000000    
   0.00000000    
   0.00000000    
   0.00000000    
   0.00000000    
   0.00000000    
   0.00000000    
   0.00000000    
   0.00000000    
   0.00000000    
   0.00000000    
   0.00000000    
   0.00000000    
   0.00000000    
   0.00000000    
   0.00000000    
   0.00000000    
   0.00000000    
   0.00000000    
   0.00000000    
   0.00000000    
   0.00000000    
   0.00000000    
   0.00000000    
   0.00000000    
   0.00000000    
   0.00000000    
   0.00000000    
   0.00000000    
   0.00000000    
   0.00000000    
   0.00000000    
   0.00000000    
   0.00000000    
   0.00000000    
   0.00000000    
   0.00000000    
   0.00000000    
   0.00000000    
   0.00000000    
   0.00000000    
   0.00000000    
   0.00000000    
   0.00000000    
   0.00000000    
   0.00000000    
   0.00000000    
   0.00000000    
   0.00000000    
   0.00000000    
   0.00000000    
   0.00000000    
   0.00000000    
   0.00000000    
   0.00000000    
   0.00000000    
   0.00000000    
   0.00000000    
   0.00000000    
   0.00000000    
   0.00000000    
   0.00000000    
   0.00000000    
   0.00000000    
   0.00000000    
   0.00000000    
   0.00000000    
   0.00000000    
   0.00000000    
   0.00000000    
   0.00000000    
   0.00000000    
   0.00000000    
   0.00000000    
   0.00000000    
   0.00000000    
   0.00000000    
   0.00000000    
   0.00000000    
   0.00000000    
   0.00000000    
   0.00000000    
   0.00000000    
   0.00000000    
   0.00000000    
   0.00000000    
   0.00000000    
   0.00000000    
   0.00000000    
   0.00000000    
   0.00000000    
   0.00000000    
   0.00000000    
   0.00000000    
   0.00000000    
   0.00000000    
   0.00000000    
   0.00000000    
   0.00000000    
   0.00000000    
   0.00000000    
   0.00000000    
   0.00000000    
   0.00000000    
   0.00000000    
   0.00000000    
   0.00000000    
   0.00000000    
   0.00000000    
   0.00000000    
   0.00000000    
   0.00000000    
   0.00000000    
   0.00000000    
   0.00000000    
   0.00000000    
   0.00000000    
   0.00000000    
   0.00000000    
   0.00000000    
   0.00000000    
   0.00000000    
   0.00000000    
   0.00000000    
   0.00000000    
   0.00000000    
   0.00000000    
   0.00000000    
   0.00000000    
   0.00000000    
   0.00000000    
   0.00000000    
   0.00000000    
   0.00000000    
   0.00000000    
   0.00000000    
   0.00000000    
   0.00000000    
   0.00000000    
   0.00000000    
   0.00000000    
   0.00000000    
   0.00000000    
   0.00000000    
   0.00000000    
   0.00000000    
   0.00000000    
   0.00000000    
   0.00000000    
   0.00000000    
   0.00000000    
   0.00000000    
   0.00000000    
   0.00000000    
   0.00000000    
   0.00000000    
   0.00000000    
   0.00000000    
   0.00000000    
   0.00000000    
   0.00000000    
   0.00000000    
   0.00000000    
   0.00000000    
   0.00000000    
   0.00000000    
   0.00000000    
   0.00000000    
   0.00000000    
   0.00000000    
   0.00000000    
   0.00000000    
   0.00000000    
   0.00000000    
   0.00000000    
   0.00000000    
   0.00000000    
   0.00000000    
   0.00000000    
   0.00000000    
   0.00000000    
   0.00000000    
   0.00000000    
   0.00000000    
   0.00000000    
   0.00000000    
   0.00000000    
   0.00000000    
   0.00000000    
   0.00000000    
   0.00000000    
   0.00000000    
   0.00000000    
   0.00000000    
   0.00000000    
   0.00000000    
   0.00000000    
   0.00000000    
   0.00000000    
   0.00000000    
   0.00000000    
   0.00000000    
   0.00000000    
   0.00000000    
   0.00000000    
   0.00000000    
   0.00000000    
   0.00000000    
   0.00000000    
   0.00000000    
   0.00000000    
   0.00000000    
   0.00000000    
   0.00000000    
   0.00000000    
   0.00000000    
   0.00000000    
   0.00000000    
   0.00000000    
   0.00000000    
   0.00000000    
   0.00000000    
   0.00000000    
   0.00000000    
   0.00000000    
   0.00000000    
   0.00000000    
   0.00000000    
   0.00000000    
   0.00000000    
   0.00000000    
   0.00000000    
   0.00000000    
   0.00000000    
   0.00000000    
   0.00000000    
   0.00000000    
   0.00000000    
   0.00000000    
   0.00000000    
   0.00000000    
   0.00000000    
   0.00000000    
   0.00000000    
   0.00000000    
   0.00000000    
   0.00000000    
   0.00000000    
   0.00000000    
   0.00000000    
   0.00000000    
   0.00000000    
   0.00000000    
   0.00000000    
   0.00000000    
   0.00000000    
   0.00000000    
   0.00000000    
   0.00000000    
   0.00000000    
   0.00000000    
   0.00000000    
   0.00000000    
   0.00000000    
   0.00000000    
   0.00000000    
   0.00000000    
   0.00000000    
   0.00000000    
   0.00000000    
   0.00000000    
   0.00000000    
   0.00000000    
   0.00000000    
   0.00000000    
   0.00000000    
   0.00000000    
   0.00000000    
   0.00000000    
   0.00000000    
   0.00000000    
   0.00000000    
   0.00000000    
   0.00000000    
   0.00000000    
   0.00000000    
   0.00000000    
   0.00000000    
   0.00000000    
   0.00000000    
   0.00000000    
   0.00000000    
   0.00000000    
   0.00000000    
   0.00000000    
   0.00000000    
   0.00000000    
   0.00000000    
   0.00000000    
   0.00000000    
   0.00000000    
   0.00000000    
   0.00000000    
   0.00000000    
   0.00000000    
   0.00000000    
   0.00000000    
   0.00000000    
   0.00000000    
   0.00000000    
   0.00000000    
   0.00000000    
   0.00000000    
   0.00000000    
   0.00000000    
   0.00000000    
   0.00000000    
   0.00000000    
   0.00000000    
   0.00000000    
   0.00000000    
   0.00000000    
   0.00000000    
   0.00000000    
   0.00000000    
   0.00000000    
   0.00000000    
   0.00000000    
   0.00000000    
   0.00000000    
   0.00000000    
   0.00000000    
   0.00000000    
   0.00000000    
   0.00000000    
   0.00000000    
   0.00000000    
   0.00000000    
   0.00000000    
   0.00000000    
   0.00000000    
   0.00000000    
   0.00000000    
   0.00000000    
   0.00000000    
   0.00000000    
   0.00000000    
   0.00000000    
   0.00000000    
   0.00000000    
   0.00000000    
   0.00000000    
   0.00000000    
   0.00000000    
   0.00000000    
   0.00000000    
   0.00000000    
   0.00000000    
   0.00000000    
   0.00000000    
   0.00000000    
   0.00000000    
   0.00000000    
   0.00000000    
   0.00000000    
   0.00000000    
   0.00000000    
   0.00000000    
   0.00000000    
   0.00000000    
   0.00000000    
   0.00000000    
   0.00000000    
   0.00000000    
   0.00000000    
   0.00000000    
   0.00000000    
   0.00000000    
   0.00000000    
   0.00000000    
   0.00000000    
   0.00000000    
   0.00000000    
   0.00000000    
   0.00000000    
   0.00000000    
   0.00000000    
   0.00000000    
   0.00000000    
   0.00000000    
   0.00000000    
   0.00000000    
   0.00000000    
   0.00000000    
   0.00000000    
   0.00000000    
   0.00000000    
   0.00000000    
   0.00000000    
   0.00000000    
   0.00000000    
   0.00000000    
   0.00000000    
   0.00000000    
   0.00000000    
   0.00000000    
   0.00000000    
   0.00000000    
   0.00000000    
   0.00000000    
   0.00000000    
   0.00000000    
   0.00000000    
   0.00000000    
   0.00000000    
   0.00000000    
   0.00000000    
   0.00000000    
   0.00000000    
   0.00000000    
   0.00000000    
   0.00000000    
   0.00000000    
   0.00000000    
   0.00000000    
   0.00000000    
   0.00000000    
   0.00000000    
   0.00000000    
   0.00000000    
   0.00000000    
   0.00000000    
   0.00000000    
   0.00000000    
   0.00000000    
   0.00000000    
   0.00000000    
   0.00000000    
   0.00000000    
   0.00000000    
   0.00000000    
   0.00000000    
   0.00000000    
   0.00000000    
   0.00000000    
   0.00000000    
   0.00000000    
   0.00000000    
   0.00000000    
   0.00000000    
   0.00000000    
   0.00000000    
   0.00000000    
   0.00000000    
   0.00000000    
   0.00000000    
   0.00000000    
   0.00000000    
   0.00000000    
   0.00000000    
   0.00000000    
   0.00000000    
   0.00000000    
   0.00000000    
   0.00000000    
   0.00000000    
   0.00000000    
   0.00000000    
   0.00000000    
   0.00000000    
   0.00000000    
   0.00000000    
   0.00000000    
   0.00000000    
   0.00000000    
   0.00000000    
   0.00000000    
   0.00000000    
   0.00000000    
   0.00000000    
   0.00000000    
   0.00000000    
   0.00000000    
   0.00000000    
   0.00000000    
   0.00000000    
   0.00000000    
   0.00000000    
   0.00000000    
   0.00000000    
   0.00000000    
   0.00000000    
   0.00000000    
   0.00000000    
   0.00000000    
   0.00000000    
   0.00000000    
   0.00000000    
   0.00000000    
   0.00000000    
   0.00000000    
   0.00000000    
   0.00000000    
   0.00000000    
   0.00000000    
   0.00000000    
   0.00000000    
   0.00000000    
   0.00000000    
   0.00000000    
   0.00000000    
   0.00000000    
   0.00000000    
   0.00000000    
   0.00000000    
   0.00000000    
   0.00000000    
   0.00000000    
   0.00000000    
   0.00000000    
   0.00000000    
   0.00000000    
   0.00000000    
   0.00000000    
   0.00000000    
   0.00000000    
   0.00000000    
   0.00000000    
   0.00000000    
   0.00000000    
   0.00000000    
   0.00000000    
   0.00000000    
   0.00000000    
   0.00000000    
   0.00000000    
   0.00000000    
   0.00000000    
   0.00000000    
   0.00000000    
   0.00000000    
   0.00000000    
   0.00000000    
   0.00000000    
   0.00000000    
   0.00000000    
   0.00000000    
   0.00000000    
   0.00000000    
   0.00000000    
   0.00000000    
   0.00000000    
   0.00000000    
   0.00000000    
   0.00000000    
   0.00000000    
   0.00000000    
   0.00000000    
   0.00000000    
   0.00000000    
   0.00000000    
   0.00000000    
   0.00000000    
   0.00000000    
   0.00000000    
   0.00000000    
   0.00000000    
   0.00000000    
   0.00000000    
   0.00000000    
   0.00000000    
   0.00000000    
   0.00000000    
   0.00000000    
   0.00000000    
   0.00000000    
   0.00000000    
   0.00000000    
   0.00000000    
   0.00000000    
   0.00000000    
   0.00000000    
   0.00000000    
   0.00000000    
   0.00000000    
   0.00000000    
   0.00000000    
   0.00000000    
   0.00000000    
   0.00000000    
   0.00000000    
   0.00000000    
   0.00000000    
   0.00000000    
   0.00000000    
   0.00000000    
   0.00000000    
   0.00000000    
   0.00000000    
   0.00000000    
   0.00000000    
   0.00000000    
   0.00000000    
   0.00000000    
   0.00000000    
   0.00000000    
   0.00000000    
   0.00000000    
   0.00000000    
   0.00000000    
   0.00000000    
   0.00000000    
   0.00000000    
   0.00000000    
   0.00000000    
   0.00000000    
   0.00000000    
   0.00000000    
   0.00000000    
   0.00000000    
   0.00000000    
   0.00000000    
   0.00000000    
   0.00000000    
   0.00000000    
   0.00000000    
   0.00000000    
   0.00000000    
   0.00000000    
   0.00000000    
   0.00000000    
   0.00000000    
   0.00000000    
   0.00000000    
   0.00000000    
   0.00000000    
   0.00000000    
   0.00000000    
   0.00000000    
   0.00000000    
   0.00000000    
   0.00000000    
   0.00000000    
   0.00000000    
   0.00000000    
   0.00000000    
   0.00000000    
   0.00000000    
   0.00000000    
   0.00000000    
   0.00000000    
   0.00000000    
   0.00000000    
   0.00000000    
   0.00000000    
   0.00000000    
   0.00000000    
   0.00000000    
   0.00000000    
   0.00000000    
   0.00000000    
   0.00000000    
   0.00000000    
   0.00000000    
   0.00000000    
   0.00000000    
   0.00000000    
   0.00000000    
   0.00000000    
   0.00000000    
   0.00000000    
   0.00000000    
   0.00000000    
   0.00000000    
   0.00000000    
   0.00000000    
   0.00000000    
   0.00000000    
   0.00000000    
   0.00000000    
   0.00000000    
   0.00000000    
   0.00000000    
   0.00000000    
   0.00000000    
   0.00000000    
   0.00000000    
   0.00000000    
   0.00000000    
   0.00000000    
   0.00000000    
   0.00000000    
   0.00000000    
   0.00000000    
   0.00000000    
   0.00000000    
   0.00000000    
   0.00000000    
   0.00000000    
   0.00000000    
   0.00000000    
   0.00000000    
   0.00000000    
   0.00000000    
   0.00000000    
   0.00000000    
   0.00000000    
   0.00000000    
   0.00000000    
   0.00000000    
   0.00000000    
   0.00000000    
   0.00000000    
   0.00000000    
   0.00000000    
   0.00000000    
   0.00000000    
   0.00000000    
   0.00000000    
   0.00000000    
   0.00000000    
   0.00000000    
   0.00000000    
   0.00000000    
   0.00000000    
   0.00000000    
   0.00000000    
   0.00000000    
   0.00000000    
   0.00000000    
   0.00000000    
   0.00000000    
   0.00000000    
   0.00000000    
   0.00000000    
   0.00000000    
   0.00000000    
   0.00000000    
   0.00000000    
   0.00000000    
   0.00000000    
   0.00000000    
   0.00000000    
   0.00000000    
   0.00000000    
   0.00000000    
   0.00000000    
   0.00000000    
   0.00000000    
   0.00000000    
   0.00000000    
   0.00000000    
   0.00000000    
   0.00000000    
   0.00000000    
   0.00000000    
   0.00000000    
   0.00000000    
   0.00000000    
   0.00000000    
   0.00000000    
   0.00000000    
   0.00000000    
   0.00000000    
   0.00000000    
   0.00000000    
   0.00000000    
   0.00000000    
   0.00000000    
   0.00000000    
   0.00000000    
   0.00000000    
   0.00000000    
   0.00000000    
   0.00000000    
   0.00000000    
   0.00000000    
   0.00000000    
   0.00000000    
   0.00000000    
   0.00000000    
   0.00000000    
   0.00000000    
   0.00000000    
   0.00000000    
   0.00000000    
   0.00000000    
   0.00000000    
   0.00000000    
   0.00000000    
   0.00000000    
   0.00000000    
   0.00000000    
   0.00000000    
   0.00000000    
   0.00000000    
   0.00000000    
   0.00000000    
   0.00000000    
   0.00000000    
   0.00000000    
   0.00000000    
   0.00000000    
   0.00000000    
   0.00000000    
   0.00000000    
   0.00000000    
   0.00000000    
   0.00000000    
   0.00000000    
   0.00000000    
   0.00000000    
   0.00000000    
   0.00000000    
   0.00000000    
   0.00000000    
   0.00000000    
   0.00000000    
   0.00000000    
   0.00000000    
   0.00000000    
   0.00000000    
   0.00000000    
   0.00000000    
   0.00000000    
   0.00000000    
   0.00000000    
   0.00000000    
   0.00000000    
   0.00000000    
   0.00000000    
   0.00000000    
   0.00000000    
   0.00000000    
   0.00000000    
   0.00000000    
   0.00000000    
   0.00000000    
   0.00000000    
   0.00000000    
   0.00000000    
   0.00000000    
   0.00000000    
   0.00000000    
   0.00000000    
   0.00000000    
   0.00000000    
   0.00000000    
   0.00000000    
   0.00000000    
   0.00000000    
   0.00000000    
   0.00000000    
   0.00000000    
   0.00000000    
   0.00000000    
   0.00000000    
   0.00000000    
   0.00000000    
   0.00000000    
   0.00000000    
   0.00000000    
   0.00000000    
   0.00000000    
   0.00000000    
   0.00000000    
   0.00000000    
   0.00000000    
   0.00000000    
   0.00000000    
   0.00000000    
   0.00000000    
   0.00000000    
   0.00000000    
   0.00000000    
   0.00000000    
   0.00000000    
   0.00000000    
   0.00000000    
   0.00000000    
   0.00000000    
   0.00000000    
   0.00000000    
   0.00000000    
   0.00000000    
   0.00000000    
   0.00000000    
   0.00000000    
   0.00000000    
   0.00000000    
   0.00000000    
   0.00000000    
   0.00000000    
   0.00000000    
   0.00000000    
   0.00000000    
   0.00000000    
   0.00000000    
   0.00000000    
   0.00000000    
   0.00000000    
   0.00000000    
   0.00000000    
   0.00000000    
   0.00000000    
   0.00000000    
   0.00000000    
   0.00000000    
   0.00000000    
   0.00000000    
   0.00000000    
   0.00000000    
   0.00000000    
   0.00000000    
   0.00000000    
   0.00000000    
   0.00000000    
   0.00000000    
   0.00000000    
   0.00000000    
   0.00000000    
   0.00000000    
   0.00000000    
   0.00000000    
   0.00000000    
   0.00000000    
   0.00000000    
   0.00000000    
   0.00000000    
   0.00000000    
   0.00000000    
   0.00000000    
   0.00000000    
   0.00000000    
   0.00000000    
   0.00000000    
   0.00000000    
   0.00000000    
   0.00000000    
   0.00000000    
   0.00000000    
   0.00000000    
   0.00000000    
   0.00000000    
   0.00000000    
   0.00000000    
   0.00000000    
   0.00000000    
   0.00000000    
   0.00000000    
   0.00000000    
   0.00000000    
   0.00000000    
   0.00000000    
   0.00000000    
   0.00000000    
   0.00000000    
   0.00000000    
   0.00000000    
   0.00000000    
   0.00000000    
   0.00000000    
   0.00000000    
   0.00000000    
   0.00000000    
   0.00000000    
   0.00000000    
   0.00000000    
   0.00000000    
   0.00000000    
   0.00000000    
   0.00000000    
   0.00000000    
   0.00000000    
   0.00000000    
   0.00000000    
   0.00000000    
   0.00000000    
   0.00000000    
   0.00000000    
   0.00000000    
   0.00000000    
   0.00000000    
   0.00000000    
   0.00000000    
   0.00000000    
   0.00000000    
   0.00000000    
   0.00000000    
   0.00000000    
   0.00000000    
   0.00000000    
   0.00000000    
   0.00000000    
   0.00000000    
   0.00000000    
   0.00000000    
   0.00000000    
   0.00000000    
   0.00000000    
   0.00000000    
   0.00000000    
   0.00000000    
   0.00000000    
   0.00000000    
   0.00000000    
   0.00000000    
   0.00000000    
   0.00000000    
   0.00000000    
   0.00000000    
   0.00000000    
   0.00000000    
   0.00000000    
   0.00000000    
   0.00000000    
   0.00000000    
   0.00000000    
   0.00000000    
   0.00000000    
   0.00000000    
   0.00000000    
   0.00000000    
   0.00000000    
   0.00000000    
   0.00000000    
   0.00000000    
   0.00000000    
   0.00000000    
   0.00000000    
   0.00000000    
   0.00000000    
   0.00000000    
   0.00000000    
   0.00000000    
   0.00000000    
   0.00000000    
   0.00000000    
   0.00000000    
   0.00000000    
   0.00000000    
   0.00000000    
   0.00000000    
   0.00000000    
   0.00000000    
   0.00000000    
   0.00000000    
   0.00000000    
   0.00000000    
   0.00000000    
   0.00000000    
   0.00000000    
   0.00000000    
   0.00000000    
   0.00000000    
   0.00000000    
   0.00000000    
   0.00000000    
   0.00000000    
   0.00000000    
   0.00000000    
   0.00000000    
   0.00000000    
   0.00000000    
   0.00000000    
   0.00000000    
   0.00000000    
   0.00000000    
   0.00000000    
   0.00000000    
   0.00000000    
   0.00000000    
   0.00000000    
   0.00000000    
   0.00000000    
   0.00000000    
   0.00000000    
   0.00000000    
   0.00000000    
   0.00000000    
   0.00000000    
   0.00000000    
   0.00000000    
   0.00000000    
   0.00000000    
   0.00000000    
   0.00000000    
   0.00000000    
   0.00000000    
   0.00000000    
   0.00000000    
   0.00000000    
   0.00000000    
   0.00000000    
   0.00000000    
   0.00000000    
   0.00000000    
   0.00000000    
   0.00000000    
   0.00000000    
   0.00000000    
   0.00000000    
   0.00000000    
   0.00000000    
   0.00000000    
   0.00000000    
   0.00000000    
   0.00000000    
   0.00000000    
   0.00000000    
   0.00000000    
   0.00000000    
   0.00000000    
   0.00000000    
   0.00000000    
   0.00000000    
   0.00000000    
   0.00000000    
   0.00000000    
   0.00000000    
   0.00000000    
   0.00000000    
   0.00000000    
   0.00000000    
   0.00000000    
   0.00000000    
   0.00000000    
   0.00000000    
   0.00000000    
   0.00000000    
   0.00000000    
   0.00000000    
   0.00000000    
   0.00000000    
   0.00000000    
   0.00000000    
   0.00000000    
   0.00000000    
   0.00000000    
   0.00000000    
   0.00000000    
   0.00000000    
   0.00000000    
   0.00000000    
   0.00000000    
   0.00000000    
   0.00000000    
   0.00000000    
   0.00000000    
   0.00000000    
   0.00000000    
   0.00000000    
   0.00000000    
   0.00000000    
   0.00000000    
   0.00000000    
   0.00000000    
   0.00000000    
   0.00000000    
   0.00000000    
   0.00000000    
   0.00000000    
   0.00000000    
   0.00000000    
   0.00000000    
   0.00000000    
   0.00000000    
   0.00000000    
   0.00000000    
   0.00000000    
   0.00000000    
   0.00000000    
   0.00000000    
   0.00000000    
   0.00000000    
   0.00000000    
   0.00000000    
   0.00000000    
   0.00000000    
   0.00000000    
   0.00000000    
   0.00000000    
   0.00000000    
   0.00000000    
   0.00000000    
   0.00000000    
   0.00000000    
   0.00000000    
   0.00000000    
   0.00000000    
   0.00000000    
   0.00000000    
   0.00000000    
   0.00000000    
   0.00000000    
   0.00000000    
   0.00000000    
   0.00000000    
   0.00000000    
   0.00000000    
   0.00000000    
   0.00000000    
   0.00000000    
   0.00000000    
   0.00000000    
   0.00000000    
   0.00000000    
   0.00000000    
   0.00000000    
   0.00000000    
   0.00000000    
   0.00000000    
   0.00000000    
   0.00000000    
   0.00000000    
   0.00000000    
   0.00000000    
   0.00000000    
   0.00000000    
   0.00000000    
   0.00000000    
   0.00000000    
   0.00000000    
   0.00000000    
   0.00000000    
   0.00000000    
   0.00000000    
   0.00000000    
   0.00000000    
   0.00000000    
   0.00000000    
   0.00000000    
   0.00000000    
   0.00000000    
   0.00000000    
   0.00000000    
   0.00000000    
   0.00000000    
   0.00000000    
   0.00000000    
   0.00000000    
   0.00000000    
   0.00000000    
   0.00000000    
   0.00000000    
   0.00000000    
   0.00000000    
   0.00000000    
   0.00000000    
   0.00000000    
   0.00000000    
   0.00000000    
   0.00000000    
   0.00000000    
   0.00000000    
   0.00000000    
   0.00000000    
   0.00000000    
   0.00000000    
   0.00000000    
   0.00000000    
   0.00000000    
   0.00000000    
   0.00000000    
   0.00000000    
   0.00000000    
   0.00000000    
   0.00000000    
   0.00000000    
   0.00000000    
   0.00000000    
   0.00000000    
   0.00000000    
   0.00000000    
   0.00000000    
   0.00000000    
   0.00000000    
   0.00000000    
   0.00000000    
   0.00000000    
   0.00000000    
   0.00000000    
   0.00000000    
   0.00000000    
   0.00000000    
   0.00000000    
   0.00000000    
   0.00000000    
   0.00000000    
   0.00000000    
   0.00000000    
   0.00000000    
   0.00000000    
   0.00000000    
   0.00000000    
   0.00000000    
   0.00000000    
   0.00000000    
   0.00000000    
   0.00000000    
   0.00000000    
   0.00000000    
   0.00000000    
   0.00000000    
   0.00000000    
   0.00000000    
   0.00000000    
   0.00000000    
   0.00000000    
   0.00000000    
   0.00000000    
   0.00000000    
   0.00000000    
   0.00000000    
   1.00000000    
   0.00000000    
   0.00000000    
   0.00000000    
   0.00000000    
   0.00000000    
   0.00000000    
   0.00000000    
   0.00000000    
   0.00000000    
   0.00000000    
   0.00000000    
   0.00000000    
   0.00000000    
   0.00000000    
   0.00000000    
   0.00000000    
   0.00000000    
   0.00000000    
   0.00000000    
   0.00000000    
   0.00000000    
   0.00000000    
   0.00000000    
   0.00000000    
   0.00000000    
   0.00000000    
   0.00000000    
   0.00000000    
   0.00000000    
   0.00000000    
   0.00000000    
   0.00000000    
   0.00000000    
   0.00000000    
   0.00000000    
   0.00000000    
   0.00000000    
   0.00000000    
   0.00000000    
   0.00000000    
   0.00000000    
   0.00000000    
   0.00000000    
   0.00000000    
   0.00000000    
   0.00000000    
   0.00000000    
   0.00000000    
   0.00000000    
   0.00000000    
   0.00000000    
   0.00000000    
   0.00000000    
   0.00000000    
   0.00000000    
   0.00000000    
   0.00000000    
   0.00000000    
   1.00000000    
   0.00000000    
   0.00000000    
   0.00000000    
   1.00000000    
   0.00000000    
   0.00000000    
   0.00000000    
   0.00000000    
   0.00000000    
   0.00000000    
   1.00000000    
   0.00000000    
   0.00000000    
   0.00000000    
   1.00000000    
   0.00000000    
   0.00000000    
   0.00000000    
   0.00000000    
   0.00000000    
   0.00000000    
   0.00000000    
   0.00000000    
   0.00000000    
   0.00000000    
   0.00000000    
   0.00000000    
   0.00000000    
   0.00000000    
   0.00000000    
   0.00000000    
   0.00000000    
   0.00000000    
   0.00000000    
   0.00000000    
   0.00000000    
   0.00000000    
   0.00000000    
   0.00000000    
   0.00000000    
   0.00000000    
   0.00000000    
   0.00000000    
   0.00000000    
   0.00000000    
   0.00000000    
   0.00000000    
   0.00000000    
   0.00000000    
   0.00000000    
   0.00000000    
   0.00000000    
   0.00000000    
   0.00000000    
   0.00000000    
   0.00000000    
   0.00000000    
   0.00000000    
   0.00000000    
   0.00000000    
   0.00000000    
   0.00000000    
   0.00000000    
   0.00000000    
   0.00000000    
   1.00000000    
   1.00000000    
   0.00000000    
   0.00000000    
   1.00000000    
   0.00000000    
   0.00000000    
   0.00000000    
   0.00000000    
   1.00000000    
   0.00000000    
   0.00000000    
   0.00000000    
   1.00000000    
   1.00000000    
   0.00000000    
   0.00000000    
   0.00000000    
   0.00000000    
   0.00000000    
   0.00000000    
   0.00000000    
   0.00000000    
   0.00000000    
   0.00000000    
   0.00000000    
   0.00000000    
   0.00000000    
   0.00000000    
   0.00000000    
   0.00000000    
   0.00000000    
   0.00000000    
   0.00000000    
   0.00000000    
   0.00000000    
   0.00000000    
   0.00000000    
   0.00000000    
   0.00000000    
   0.00000000    
   0.00000000    
   0.00000000    
   0.00000000    
   0.00000000    
   0.00000000    
   0.00000000    
   0.00000000    
   0.00000000    
   0.00000000    
   0.00000000    
   0.00000000    
   0.00000000    
   0.00000000    
   0.00000000    
   0.00000000    
   0.00000000    
   0.00000000    
   0.00000000    
   0.00000000    
   0.00000000    
   1.00000000    
   0.00000000    
   0.00000000    
   0.00000000    
   0.00000000    
   0.00000000    
   0.00000000    
   0.00000000    
   0.00000000    
   0.00000000    
   1.00000000    
   0.00000000    
   0.00000000    
   1.00000000    
   0.00000000    
   0.00000000    
   1.00000000    
   0.00000000    
   1.00000000    
   2.00000000    
   0.00000000    
   0.00000000    
   0.00000000    
   0.00000000    
   0.00000000    
   0.00000000    
   0.00000000    
   0.00000000    
   0.00000000    
   0.00000000    
   0.00000000    
   0.00000000    
   0.00000000    
   0.00000000    
   0.00000000    
   0.00000000    
   0.00000000    
   0.00000000    
   0.00000000    
   0.00000000    
   0.00000000    
   0.00000000    
   0.00000000    
   0.00000000    
   0.00000000    
   0.00000000    
   0.00000000    
   0.00000000    
   0.00000000    
   0.00000000    
   0.00000000    
   0.00000000    
   0.00000000    
   0.00000000    
   0.00000000    
   0.00000000    
   0.00000000    
   0.00000000    
   0.00000000    
   0.00000000    
   0.00000000    
   0.00000000    
   0.00000000    
   0.00000000    
   0.00000000    
   0.00000000    
   0.00000000    
   0.00000000    
   0.00000000    
   0.00000000    
   0.00000000    
   0.00000000    
   0.00000000    
   1.00000000    
   0.00000000    
   2.00000000    
   0.00000000    
   1.00000000    
   0.00000000    
   0.00000000    
   0.00000000    
   0.00000000    
   0.00000000    
   0.00000000    
   0.00000000    
   0.00000000    
   0.00000000    
   0.00000000    
   0.00000000    
   0.00000000    
   0.00000000    
   0.00000000    
   0.00000000    
   0.00000000    
   0.00000000    
   0.00000000    
   0.00000000    
   0.00000000    
   0.00000000    
   0.00000000    
   0.00000000    
   0.00000000    
   0.00000000    
   0.00000000    
   0.00000000    
   0.00000000    
   0.00000000    
   0.00000000    
   0.00000000    
   0.00000000    
   0.00000000    
   0.00000000    
   0.00000000    
   0.00000000    
   0.00000000    
   0.00000000    
   0.00000000    
   0.00000000    
   0.00000000    
   0.00000000    
   0.00000000    
   0.00000000    
   0.00000000    
   0.00000000    
   2.00000000    
   1.00000000    
   0.00000000    
   1.00000000    
   1.00000000    
   0.00000000    
   0.00000000    
   1.00000000    
   2.00000000    
   0.00000000    
   0.00000000    
   0.00000000    
   1.00000000    
   0.00000000    
   0.00000000    
   0.00000000    
   1.00000000    
   0.00000000    
   0.00000000    
   0.00000000    
   0.00000000    
   1.00000000    
   1.00000000    
   1.00000000    
   1.00000000    
   0.00000000    
   0.00000000    
   0.00000000    
   0.00000000    
   0.00000000    
   0.00000000    
   0.00000000    
   0.00000000    
   0.00000000    
   0.00000000    
   0.00000000    
   0.00000000    
   0.00000000    
   0.00000000    
   0.00000000    
   0.00000000    
   0.00000000    
   0.00000000    
   0.00000000    
   0.00000000    
   0.00000000    
   0.00000000    
   0.00000000    
   0.00000000    
   0.00000000    
   0.00000000    
   0.00000000    
   0.00000000    
   0.00000000    
   0.00000000    
   0.00000000    
   0.00000000    
   0.00000000    
   0.00000000    
   0.00000000    
   0.00000000    
   0.00000000    
   0.00000000    
   0.00000000    
   0.00000000    
   1.00000000    
   1.00000000    
   0.00000000    
   0.00000000    
   1.00000000    
   0.00000000    
   1.00000000    
   2.00000000    
   1.00000000    
   0.00000000    
   0.00000000    
   1.00000000    
   0.00000000    
   0.00000000    
   1.00000000    
   0.00000000    
   1.00000000    
   0.00000000    
   0.00000000    
   0.00000000    
   0.00000000    
   0.00000000    
   0.00000000    
   1.00000000    
   0.00000000    
   0.00000000    
   0.00000000    
   0.00000000    
   0.00000000    
   0.00000000    
   0.00000000    
   0.00000000    
   0.00000000    
   0.00000000    
   0.00000000    
   0.00000000    
   0.00000000    
   0.00000000    
   0.00000000    
   0.00000000    
   0.00000000    
   0.00000000    
   0.00000000    
   0.00000000    
   0.00000000    
   0.00000000    
   0.00000000    
   0.00000000    
   0.00000000    
   0.00000000    
   0.00000000    
   0.00000000    
   0.00000000    
   0.00000000    
   0.00000000    
   0.00000000    
   0.00000000    
   0.00000000    
   0.00000000    
   0.00000000    
   0.00000000    
   0.00000000    
   0.00000000    
   0.00000000    
   0.00000000    
   0.00000000    
   1.00000000    
   0.00000000    
   0.00000000    
   0.00000000    
   1.00000000    
   0.00000000    
   1.00000000    
   1.00000000    
   0.00000000    
   0.00000000    
   1.00000000    
   1.00000000    
   0.00000000    
   0.00000000    
   0.00000000    
   0.00000000    
   1.00000000    
   0.00000000    
   0.00000000    
   0.00000000    
   1.00000000    
   0.00000000    
   0.00000000    
   0.00000000    
   0.00000000    
   0.00000000    
   0.00000000    
   0.00000000    
   0.00000000    
   0.00000000    
   0.00000000    
   0.00000000    
   0.00000000    
   0.00000000    
   0.00000000    
   0.00000000    
   0.00000000    
   0.00000000    
   0.00000000    
   0.00000000    
   0.00000000    
   0.00000000    
   0.00000000    
   0.00000000    
   0.00000000    
   0.00000000    
   0.00000000    
   0.00000000    
   0.00000000    
   0.00000000    
   0.00000000    
   0.00000000    
   0.00000000    
   0.00000000    
   0.00000000    
   0.00000000    
   0.00000000    
   0.00000000    
   0.00000000    
   0.00000000    
   0.00000000    
   0.00000000    
   0.00000000    
   1.00000000    
   0.00000000    
   1.00000000    
   0.00000000    
   0.00000000    
   2.00000000    
   2.00000000    
   1.00000000    
   0.00000000    
   1.00000000    
   0.00000000    
   1.00000000    
   1.00000000    
   0.00000000    
   0.00000000    
   1.00000000    
   0.00000000    
   0.00000000    
   0.00000000    
   0.00000000    
   0.00000000    
   0.00000000    
   1.00000000    
   0.00000000    
   0.00000000    
   1.00000000    
   0.00000000    
   0.00000000    
   0.00000000    
   0.00000000    
   0.00000000    
   0.00000000    
   0.00000000    
   0.00000000    
   0.00000000    
   0.00000000    
   0.00000000    
   0.00000000    
   0.00000000    
   0.00000000    
   0.00000000    
   0.00000000    
   0.00000000    
   0.00000000    
   0.00000000    
   0.00000000    
   0.00000000    
   0.00000000    
   0.00000000    
   0.00000000    
   0.00000000    
   0.00000000    
   0.00000000    
   0.00000000    
   0.00000000    
   0.00000000    
   0.00000000    
   0.00000000    
   0.00000000    
   0.00000000    
   0.00000000    
   0.00000000    
   0.00000000    
   0.00000000    
   0.00000000    
   0.00000000    
   1.00000000    
   0.00000000    
   1.00000000    
   0.00000000    
   0.00000000    
   0.00000000    
   1.00000000    
   0.00000000    
   1.00000000    
   0.00000000    
   0.00000000    
   1.00000000    
   0.00000000    
   1.00000000    
   0.00000000    
   0.00000000    
   0.00000000    
   2.00000000    
   1.00000000    
   0.00000000    
   0.00000000    
   1.00000000    
   0.00000000    
   1.00000000    
   1.00000000    
   0.00000000    
   0.00000000    
   0.00000000    
   0.00000000    
   0.00000000    
   0.00000000    
   0.00000000    
   0.00000000    
   0.00000000    
   0.00000000    
   0.00000000    
   0.00000000    
   0.00000000    
   0.00000000    
   0.00000000    
   0.00000000    
   0.00000000    
   0.00000000    
   0.00000000    
   0.00000000    
   0.00000000    
   0.00000000    
   0.00000000    
   0.00000000    
   0.00000000    
   0.00000000    
   0.00000000    
   0.00000000    
   0.00000000    
   0.00000000    
   0.00000000    
   0.00000000    
   0.00000000    
   0.00000000    
   0.00000000    
   1.00000000    
   1.00000000    
   0.00000000    
   0.00000000    
   2.00000000    
   0.00000000    
   1.00000000    
   0.00000000    
   0.00000000    
   0.00000000    
   2.00000000    
   0.00000000    
   0.00000000    
   1.00000000    
   0.00000000    
   1.00000000    
   1.00000000    
   0.00000000    
   0.00000000    
   0.00000000    
   0.00000000    
   0.00000000    
   0.00000000    
   0.00000000    
   0.00000000    
   1.00000000    
   0.00000000    
   0.00000000    
   1.00000000    
   0.00000000    
   0.00000000    
   0.00000000    
   0.00000000    
   0.00000000    
   0.00000000    
   0.00000000    
   0.00000000    
   0.00000000    
   0.00000000    
   0.00000000    
   0.00000000    
   0.00000000    
   0.00000000    
   0.00000000    
   0.00000000    
   0.00000000    
   0.00000000    
   0.00000000    
   0.00000000    
   0.00000000    
   0.00000000    
   0.00000000    
   0.00000000    
   0.00000000    
   0.00000000    
   0.00000000    
   0.00000000    
   0.00000000    
   0.00000000    
   0.00000000    
   0.00000000    
   0.00000000    
   0.00000000    
   0.00000000    
   0.00000000    
   1.00000000    
   0.00000000    
   0.00000000    
   0.00000000    
   1.00000000    
   0.00000000    
   0.00000000    
   1.00000000    
   0.00000000    
   0.00000000    
   0.00000000    
   1.00000000    
   1.00000000    
   3.00000000    
   1.00000000    
   0.00000000    
   0.00000000    
   0.00000000    
   0.00000000    
   1.00000000    
   0.00000000    
   0.00000000    
   0.00000000    
   0.00000000    
   0.00000000    
   0.00000000    
   0.00000000    
   0.00000000    
   0.00000000    
   0.00000000    
   0.00000000    
   0.00000000    
   0.00000000    
   0.00000000    
   0.00000000    
   0.00000000    
   0.00000000    
   0.00000000    
   0.00000000    
   0.00000000    
   0.00000000    
   0.00000000    
   0.00000000    
   0.00000000    
   0.00000000    
   0.00000000    
   0.00000000    
   0.00000000    
   0.00000000    
   0.00000000    
   0.00000000    
   0.00000000    
   0.00000000    
   0.00000000    
   0.00000000    
   0.00000000    
   0.00000000    
   0.00000000    
   0.00000000    
   0.00000000    
   0.00000000    
   0.00000000    
   0.00000000    
   0.00000000    
   0.00000000    
   0.00000000    
   2.00000000    
   1.00000000    
   0.00000000    
   0.00000000    
   2.00000000    
   0.00000000    
   0.00000000    
   2.00000000    
   1.00000000    
   0.00000000    
   0.00000000    
   0.00000000    
   1.00000000
[truncated: 4,320,541 more chars]
