# Supplementary material
Source: MDPI journal article supplement (https://www.mdpi.com/2076-3417/11/1/54)
Supplement: s1 [file s1 › cube5p.cub]

 cube data
 Gaussian cube format
          20  -4.00000000      -4.00000000      -4.00000000    
          64  0.12500000000000000        0.00000000       0.00000000    
          64   0.00000000      0.12500000000000000        0.00000000    
          64   0.00000000       0.00000000      0.12500000000000000     
           8   0.00000000      -2.07932115      -1.97276711      -2.29387617    
           8   0.00000000       2.57476521      -2.21362805      -1.96726370    
           8   0.00000000      -2.07932115       2.27726173      -2.29387617    
           8   0.00000000      -2.07932138      -2.38401151       2.08618379    
           8   0.00000000      -1.20171297       3.10951751E-02  -3.64859271    
           8   0.00000000      -8.27104002E-02  -3.44043541      -1.46554494    
           8   0.00000000      -3.36652017      -1.60861695       1.81694999E-02
           8   0.00000000       1.37976849     -0.150253922      -3.04398775    
           8   0.00000000       8.35595876E-02  -3.75244808       1.07881427    
           8   0.00000000      -3.44887567       1.18188679     -0.192929953    
           8   0.00000000      -9.25951228E-02   3.47910762     -0.971089065    
           8   0.00000000      -2.52592993       2.10793447       1.96762824    
           8   0.00000000       2.06156063       2.02736545      -1.78186655    
           8   0.00000000       3.92802572      -1.07401609      0.240620136    
           8   0.00000000      -1.39689970       7.63944834E-02   3.04915333    
           8   0.00000000       2.11985850      -2.26859164       1.90588129    
           8   0.00000000       1.89247549       2.47682333       2.18984962    
           8   0.00000000     -0.444541633       3.58778310       1.62332165    
           8   0.00000000       3.46250367       1.65802824      0.285480142    
           8   0.00000000       1.29523242      -3.89175527E-02   3.21392655    
   0.00000000    
   0.00000000    
   0.00000000    
   0.00000000    
   0.00000000    
   0.00000000    
   0.00000000    
   0.00000000    
   0.00000000    
   0.00000000    
   0.00000000    
   0.00000000    
   0.00000000    
   0.00000000    
   0.00000000    
   0.00000000    
   0.00000000    
   0.00000000    
   0.00000000    
   0.00000000    
   0.00000000    
   0.00000000    
   0.00000000    
   0.00000000    
   0.00000000    
   0.00000000    
   0.00000000    
   0.00000000    
   0.00000000    
   0.00000000    
   0.00000000    
   0.00000000    
   0.00000000    
   0.00000000    
   0.00000000    
   0.00000000    
   0.00000000    
   0.00000000    
   0.00000000    
   0.00000000    
   0.00000000    
   0.00000000    
   0.00000000    
   0.00000000    
   0.00000000    
   0.00000000    
   0.00000000    
   0.00000000    
   0.00000000    
   0.00000000    
   0.00000000    
   0.00000000    
   0.00000000    
   0.00000000    
   0.00000000    
   0.00000000    
   0.00000000    
   0.00000000    
   0.00000000    
   0.00000000    
   0.00000000    
   0.00000000    
   0.00000000    
   0.00000000    
   0.00000000    
   0.00000000    
   0.00000000    
   0.00000000    
   0.00000000    
   0.00000000    
   0.00000000    
   0.00000000    
   0.00000000    
   0.00000000    
   0.00000000    
   0.00000000    
   0.00000000    
   0.00000000    
   0.00000000    
   0.00000000    
   0.00000000    
   0.00000000    
   0.00000000    
   0.00000000    
   0.00000000    
   0.00000000    
   0.00000000    
   0.00000000    
   0.00000000    
   0.00000000    
   0.00000000    
   0.00000000    
   0.00000000    
   0.00000000    
   0.00000000    
   0.00000000    
   0.00000000    
   0.00000000    
   0.00000000    
   0.00000000    
   0.00000000    
   0.00000000    
   0.00000000    
   0.00000000    
   0.00000000    
   0.00000000    
   0.00000000    
   0.00000000    
   0.00000000    
   0.00000000    
   0.00000000    
   0.00000000    
   0.00000000    
   0.00000000    
   0.00000000    
   0.00000000    
   0.00000000    
   0.00000000    
   0.00000000    
   0.00000000    
   0.00000000    
   0.00000000    
   0.00000000    
   0.00000000    
   0.00000000    
   0.00000000    
   0.00000000    
   0.00000000    
   0.00000000    
   0.00000000    
   0.00000000    
   0.00000000    
   0.00000000    
   0.00000000    
   0.00000000    
   0.00000000    
   0.00000000    
   0.00000000    
   0.00000000    
   0.00000000    
   0.00000000    
   0.00000000    
   0.00000000    
   0.00000000    
   0.00000000    
   0.00000000    
   0.00000000    
   0.00000000    
   0.00000000    
   0.00000000    
   0.00000000    
   0.00000000    
   0.00000000    
   0.00000000    
   0.00000000    
   0.00000000    
   0.00000000    
   0.00000000    
   0.00000000    
   0.00000000    
   0.00000000    
   0.00000000    
   0.00000000    
   0.00000000    
   0.00000000    
   0.00000000    
   0.00000000    
   0.00000000    
   0.00000000    
   0.00000000    
   0.00000000    
   0.00000000    
   0.00000000    
   0.00000000    
   0.00000000    
   0.00000000    
   0.00000000    
   0.00000000    
   0.00000000    
   0.00000000    
   0.00000000    
   0.00000000    
   0.00000000    
   0.00000000    
   0.00000000    
   0.00000000    
   0.00000000    
   0.00000000    
   0.00000000    
   0.00000000    
   0.00000000    
   0.00000000    
   0.00000000    
   0.00000000    
   0.00000000    
   0.00000000    
   0.00000000    
   0.00000000    
   0.00000000    
   0.00000000    
   0.00000000    
   0.00000000    
   0.00000000    
   0.00000000    
   0.00000000    
   0.00000000    
   0.00000000    
   0.00000000    
   0.00000000    
   0.00000000    
   0.00000000    
   0.00000000    
   0.00000000    
   0.00000000    
   0.00000000    
   0.00000000    
   0.00000000    
   0.00000000    
   0.00000000    
   0.00000000    
   0.00000000    
   0.00000000    
   0.00000000    
   0.00000000    
   0.00000000    
   0.00000000    
   0.00000000    
   0.00000000    
   0.00000000    
   0.00000000    
   0.00000000    
   0.00000000    
   0.00000000    
   0.00000000    
   0.00000000    
   0.00000000    
   0.00000000    
   0.00000000    
   0.00000000    
   0.00000000    
   0.00000000    
   0.00000000    
   0.00000000    
   0.00000000    
   0.00000000    
   0.00000000    
   0.00000000    
   0.00000000    
   0.00000000    
   0.00000000    
   0.00000000    
   0.00000000    
   0.00000000    
   0.00000000    
   0.00000000    
   0.00000000    
   0.00000000    
   0.00000000    
   0.00000000    
   0.00000000    
   0.00000000    
   0.00000000    
   0.00000000    
   0.00000000    
   0.00000000    
   0.00000000    
   0.00000000    
   0.00000000    
   0.00000000    
   0.00000000    
   0.00000000    
   0.00000000    
   0.00000000    
   0.00000000    
   0.00000000    
   0.00000000    
   0.00000000    
   0.00000000    
   0.00000000    
   0.00000000    
   0.00000000    
   0.00000000    
   0.00000000    
   0.00000000    
   0.00000000    
   0.00000000    
   0.00000000    
   0.00000000    
   0.00000000    
   0.00000000    
   0.00000000    
   0.00000000    
   0.00000000    
   0.00000000    
   0.00000000    
   0.00000000    
   0.00000000    
   0.00000000    
   0.00000000    
   0.00000000    
   0.00000000    
   0.00000000    
   0.00000000    
   0.00000000    
   0.00000000    
   0.00000000    
   0.00000000    
   0.00000000    
   0.00000000    
   0.00000000    
   0.00000000    
   0.00000000    
   0.00000000    
   0.00000000    
   0.00000000    
   0.00000000    
   0.00000000    
   0.00000000    
   0.00000000    
   0.00000000    
   0.00000000    
   0.00000000    
   0.00000000    
   0.00000000    
   0.00000000    
   0.00000000    
   0.00000000    
   0.00000000    
   0.00000000    
   0.00000000    
   0.00000000    
   0.00000000    
   0.00000000    
   0.00000000    
   0.00000000    
   0.00000000    
   0.00000000    
   0.00000000    
   0.00000000    
   0.00000000    
   0.00000000    
   0.00000000    
   0.00000000    
   0.00000000    
   0.00000000    
   0.00000000    
   0.00000000    
   0.00000000    
   0.00000000    
   0.00000000    
   0.00000000    
   0.00000000    
   0.00000000    
   0.00000000    
   0.00000000    
   0.00000000    
   0.00000000    
   0.00000000    
   0.00000000    
   0.00000000    
   0.00000000    
   0.00000000    
   0.00000000    
   0.00000000    
   0.00000000    
   0.00000000    
   0.00000000    
   0.00000000    
   0.00000000    
   0.00000000    
   0.00000000    
   0.00000000    
   0.00000000    
   0.00000000    
   0.00000000    
   0.00000000    
   0.00000000    
   0.00000000    
   0.00000000    
   0.00000000    
   0.00000000    
   0.00000000    
   0.00000000    
   0.00000000    
   0.00000000    
   0.00000000    
   0.00000000    
   0.00000000    
   0.00000000    
   0.00000000    
   0.00000000    
   0.00000000    
   0.00000000    
   0.00000000    
   0.00000000    
   0.00000000    
   0.00000000    
   0.00000000    
   0.00000000    
   0.00000000    
   0.00000000    
   0.00000000    
   0.00000000    
   0.00000000    
   0.00000000    
   0.00000000    
   0.00000000    
   0.00000000    
   0.00000000    
   0.00000000    
   0.00000000    
   0.00000000    
   0.00000000    
   0.00000000    
   0.00000000    
   0.00000000    
   0.00000000    
   0.00000000    
   0.00000000    
   0.00000000    
   0.00000000    
   0.00000000    
   0.00000000    
   0.00000000    
   0.00000000    
   0.00000000    
   0.00000000    
   0.00000000    
   0.00000000    
   0.00000000    
   0.00000000    
   0.00000000    
   0.00000000    
   0.00000000    
   0.00000000    
   0.00000000    
   0.00000000    
   0.00000000    
   0.00000000    
   0.00000000    
   0.00000000    
   0.00000000    
   0.00000000    
   0.00000000    
   0.00000000    
   0.00000000    
   0.00000000    
   0.00000000    
   0.00000000    
   0.00000000    
   0.00000000    
   0.00000000    
   0.00000000    
   0.00000000    
   0.00000000    
   0.00000000    
   0.00000000    
   0.00000000    
   0.00000000    
   0.00000000    
   0.00000000    
   0.00000000    
   0.00000000    
   0.00000000    
   0.00000000    
   0.00000000    
   0.00000000    
   0.00000000    
   0.00000000    
   0.00000000    
   0.00000000    
   0.00000000    
   0.00000000    
   0.00000000    
   0.00000000    
   0.00000000    
   0.00000000    
   0.00000000    
   0.00000000    
   0.00000000    
   0.00000000    
   0.00000000    
   0.00000000    
   0.00000000    
   0.00000000    
   0.00000000    
   0.00000000    
   0.00000000    
   0.00000000    
   0.00000000    
   0.00000000    
   0.00000000    
   0.00000000    
   0.00000000    
   0.00000000    
   0.00000000    
   0.00000000    
   0.00000000    
   0.00000000    
   0.00000000    
   0.00000000    
   0.00000000    
   0.00000000    
   0.00000000    
   0.00000000    
   0.00000000    
   0.00000000    
   0.00000000    
   0.00000000    
   0.00000000    
   0.00000000    
   0.00000000    
   0.00000000    
   0.00000000    
   0.00000000    
   0.00000000    
   0.00000000    
   0.00000000    
   0.00000000    
   0.00000000    
   0.00000000    
   0.00000000    
   0.00000000    
   0.00000000    
   0.00000000    
   0.00000000    
   0.00000000    
   0.00000000    
   0.00000000    
   0.00000000    
   0.00000000    
   0.00000000    
   0.00000000    
   0.00000000    
   0.00000000    
   0.00000000    
   0.00000000    
   0.00000000    
   0.00000000    
   0.00000000    
   0.00000000    
   0.00000000    
   0.00000000    
   0.00000000    
   0.00000000    
   0.00000000    
   0.00000000    
   0.00000000    
   0.00000000    
   0.00000000    
   0.00000000    
   0.00000000    
   0.00000000    
   0.00000000    
   0.00000000    
   0.00000000    
   0.00000000    
   0.00000000    
   0.00000000    
   0.00000000    
   0.00000000    
   0.00000000    
   0.00000000    
   0.00000000    
   0.00000000    
   0.00000000    
   0.00000000    
   0.00000000    
   0.00000000    
   0.00000000    
   0.00000000    
   0.00000000    
   0.00000000    
   0.00000000    
   0.00000000    
   0.00000000    
   0.00000000    
   0.00000000    
   0.00000000    
   0.00000000    
   0.00000000    
   0.00000000    
   0.00000000    
   0.00000000    
   0.00000000    
   0.00000000    
   0.00000000    
   0.00000000    
   0.00000000    
   0.00000000    
   0.00000000    
   0.00000000    
   0.00000000    
   0.00000000    
   0.00000000    
   0.00000000    
   0.00000000    
   0.00000000    
   0.00000000    
   0.00000000    
   0.00000000    
   0.00000000    
   0.00000000    
   0.00000000    
   0.00000000    
   0.00000000    
   0.00000000    
   0.00000000    
   0.00000000    
   0.00000000    
   0.00000000    
   0.00000000    
   0.00000000    
   0.00000000    
   0.00000000    
   0.00000000    
   0.00000000    
   0.00000000    
   0.00000000    
   0.00000000    
   0.00000000    
   0.00000000    
   0.00000000    
   0.00000000    
   0.00000000    
   0.00000000    
   0.00000000    
   0.00000000    
   0.00000000    
   0.00000000    
   0.00000000    
   0.00000000    
   0.00000000    
   0.00000000    
   0.00000000    
   0.00000000    
   0.00000000    
   0.00000000    
   0.00000000    
   0.00000000    
   0.00000000    
   0.00000000    
   0.00000000    
   0.00000000    
   0.00000000    
   0.00000000    
   0.00000000    
   0.00000000    
   0.00000000    
   0.00000000    
   0.00000000    
   0.00000000    
   0.00000000    
   0.00000000    
   0.00000000    
   0.00000000    
   0.00000000    
   0.00000000    
   0.00000000    
   0.00000000    
   0.00000000    
   0.00000000    
   0.00000000    
   0.00000000    
   0.00000000    
   0.00000000    
   0.00000000    
   0.00000000    
   0.00000000    
   0.00000000    
   0.00000000    
   0.00000000    
   0.00000000    
   0.00000000    
   0.00000000    
   0.00000000    
   0.00000000    
   0.00000000    
   0.00000000    
   0.00000000    
   0.00000000    
   0.00000000    
   0.00000000    
   0.00000000    
   0.00000000    
   0.00000000    
   0.00000000    
   0.00000000    
   0.00000000    
   0.00000000    
   0.00000000    
   0.00000000    
   0.00000000    
   0.00000000    
   0.00000000    
   0.00000000    
   0.00000000    
   0.00000000    
   0.00000000    
   0.00000000    
   0.00000000    
   0.00000000    
   0.00000000    
   0.00000000    
   0.00000000    
   0.00000000    
   0.00000000    
   0.00000000    
   0.00000000    
   0.00000000    
   0.00000000    
   0.00000000    
   0.00000000    
   0.00000000    
   0.00000000    
   0.00000000    
   0.00000000    
   0.00000000    
   0.00000000    
   0.00000000    
   0.00000000    
   0.00000000    
   0.00000000    
   0.00000000    
   0.00000000    
   0.00000000    
   0.00000000    
   0.00000000    
   0.00000000    
   0.00000000    
   0.00000000    
   0.00000000    
   0.00000000    
   0.00000000    
   0.00000000    
   0.00000000    
   0.00000000    
   0.00000000    
   0.00000000    
   0.00000000    
   0.00000000    
   0.00000000    
   0.00000000    
   0.00000000    
   0.00000000    
   0.00000000    
   0.00000000    
   0.00000000    
   0.00000000    
   0.00000000    
   0.00000000    
   0.00000000    
   0.00000000    
   0.00000000    
   0.00000000    
   0.00000000    
   0.00000000    
   0.00000000    
   0.00000000    
   0.00000000    
   0.00000000    
   0.00000000    
   0.00000000    
   0.00000000    
   0.00000000    
   0.00000000    
   0.00000000    
   0.00000000    
   0.00000000    
   0.00000000    
   0.00000000    
   0.00000000    
   0.00000000    
   0.00000000    
   0.00000000    
   0.00000000    
   0.00000000    
   0.00000000    
   0.00000000    
   0.00000000    
   0.00000000    
   0.00000000    
   0.00000000    
   0.00000000    
   0.00000000    
   0.00000000    
   0.00000000    
   0.00000000    
   0.00000000    
   0.00000000    
   0.00000000    
   0.00000000    
   0.00000000    
   0.00000000    
   0.00000000    
   0.00000000    
   0.00000000    
   0.00000000    
   0.00000000    
   0.00000000    
   0.00000000    
   0.00000000    
   0.00000000    
   0.00000000    
   0.00000000    
   0.00000000    
   0.00000000    
   0.00000000    
   0.00000000    
   0.00000000    
   0.00000000    
   0.00000000    
   0.00000000    
   0.00000000    
   0.00000000    
   0.00000000    
   0.00000000    
   0.00000000    
   0.00000000    
   0.00000000    
   0.00000000    
   0.00000000    
   0.00000000    
   0.00000000    
   0.00000000    
   0.00000000    
   0.00000000    
   0.00000000    
   0.00000000    
   0.00000000    
   0.00000000    
   0.00000000    
   0.00000000    
   0.00000000    
   0.00000000    
   0.00000000    
   0.00000000    
   0.00000000    
   0.00000000    
   0.00000000    
   0.00000000    
   0.00000000    
   0.00000000    
   0.00000000    
   0.00000000    
   0.00000000    
   0.00000000    
   0.00000000    
   0.00000000    
   0.00000000    
   0.00000000    
   0.00000000    
   0.00000000    
   0.00000000    
   0.00000000    
   0.00000000    
   0.00000000    
   0.00000000    
   0.00000000    
   0.00000000    
   0.00000000    
   0.00000000    
   0.00000000    
   0.00000000    
   0.00000000    
   0.00000000    
   0.00000000    
   0.00000000    
   0.00000000    
   0.00000000    
   0.00000000    
   0.00000000    
   0.00000000    
   0.00000000    
   0.00000000    
   0.00000000    
   0.00000000    
   0.00000000    
   0.00000000    
   0.00000000    
   0.00000000    
   0.00000000    
   0.00000000    
   0.00000000    
   0.00000000    
   0.00000000    
   0.00000000    
   0.00000000    
   0.00000000    
   0.00000000    
   0.00000000    
   0.00000000    
   0.00000000    
   0.00000000    
   0.00000000    
   0.00000000    
   0.00000000    
   0.00000000    
   0.00000000    
   0.00000000    
   0.00000000    
   0.00000000    
   0.00000000    
   0.00000000    
   0.00000000    
   0.00000000    
   0.00000000    
   0.00000000    
   0.00000000    
   0.00000000    
   0.00000000    
   0.00000000    
   0.00000000    
   0.00000000    
   0.00000000    
   0.00000000    
   0.00000000    
   0.00000000    
   0.00000000    
   0.00000000    
   0.00000000    
   0.00000000    
   0.00000000    
   0.00000000    
   0.00000000    
   0.00000000    
   0.00000000    
   0.00000000    
   0.00000000    
   0.00000000    
   0.00000000    
   0.00000000    
   0.00000000    
   0.00000000    
   0.00000000    
   0.00000000    
   0.00000000    
   0.00000000    
   0.00000000    
   0.00000000    
   0.00000000    
   0.00000000    
   0.00000000    
   0.00000000    
   0.00000000    
   0.00000000    
   0.00000000    
   0.00000000    
   0.00000000    
   0.00000000    
   0.00000000    
   0.00000000    
   0.00000000    
   0.00000000    
   0.00000000    
   0.00000000    
   0.00000000    
   0.00000000    
   0.00000000    
   0.00000000    
   0.00000000    
   0.00000000    
   0.00000000    
   0.00000000    
   0.00000000    
   0.00000000    
   0.00000000    
   0.00000000    
   0.00000000    
   0.00000000    
   0.00000000    
   0.00000000    
   0.00000000    
   0.00000000    
   0.00000000    
   0.00000000    
   0.00000000    
   0.00000000    
   0.00000000    
   0.00000000    
   0.00000000    
   0.00000000    
   0.00000000    
   0.00000000    
   0.00000000    
   0.00000000    
   0.00000000    
   0.00000000    
   0.00000000    
   0.00000000    
   0.00000000    
   0.00000000    
   0.00000000    
   0.00000000    
   0.00000000    
   0.00000000    
   0.00000000    
   0.00000000    
   0.00000000    
   0.00000000    
   0.00000000    
   0.00000000    
   0.00000000    
   0.00000000    
   0.00000000    
   0.00000000    
   0.00000000    
   0.00000000    
   0.00000000    
   0.00000000    
   0.00000000    
   0.00000000    
   0.00000000    
   0.00000000    
   0.00000000    
   0.00000000    
   0.00000000    
   0.00000000    
   0.00000000    
   0.00000000    
   0.00000000    
   0.00000000    
   0.00000000    
   0.00000000    
   0.00000000    
   0.00000000    
   0.00000000    
   0.00000000    
   0.00000000    
   0.00000000    
   0.00000000    
   0.00000000    
   0.00000000    
   0.00000000    
   0.00000000    
   0.00000000    
   0.00000000    
   0.00000000    
   0.00000000    
   0.00000000    
   0.00000000    
   0.00000000    
   0.00000000    
   0.00000000    
   0.00000000    
   0.00000000    
   0.00000000    
   0.00000000    
   0.00000000    
   0.00000000    
   0.00000000    
   0.00000000    
   0.00000000    
   0.00000000    
   0.00000000    
   0.00000000    
   0.00000000    
   0.00000000    
   0.00000000    
   0.00000000    
   0.00000000    
   0.00000000    
   0.00000000    
   0.00000000    
   0.00000000    
   0.00000000    
   0.00000000    
   0.00000000    
   0.00000000    
   0.00000000    
   0.00000000    
   0.00000000    
   0.00000000    
   0.00000000    
   0.00000000    
   0.00000000    
   0.00000000    
   0.00000000    
   0.00000000    
   0.00000000    
   0.00000000    
   0.00000000    
   0.00000000    
   0.00000000    
   0.00000000    
   0.00000000    
   0.00000000    
   0.00000000    
   0.00000000    
   0.00000000    
   0.00000000    
   0.00000000    
   0.00000000    
   0.00000000    
   0.00000000    
   0.00000000    
   0.00000000    
   0.00000000    
   0.00000000    
   0.00000000    
   0.00000000    
   0.00000000    
   0.00000000    
   0.00000000    
   0.00000000    
   0.00000000    
   0.00000000    
   0.00000000    
   0.00000000    
   0.00000000    
   0.00000000    
   0.00000000    
   0.00000000    
   0.00000000    
   0.00000000    
   0.00000000    
   0.00000000    
   0.00000000    
   0.00000000    
   0.00000000    
   0.00000000    
   0.00000000    
   0.00000000    
   0.00000000    
   0.00000000    
   0.00000000    
   0.00000000    
   0.00000000    
   0.00000000    
   0.00000000    
   0.00000000    
   0.00000000    
   0.00000000    
   0.00000000    
   0.00000000    
   0.00000000    
   0.00000000    
   0.00000000    
   0.00000000    
   0.00000000    
   0.00000000    
   0.00000000    
   0.00000000    
   0.00000000    
   0.00000000    
   0.00000000    
   0.00000000    
   0.00000000    
   0.00000000    
   0.00000000    
   0.00000000    
   0.00000000    
   0.00000000    
   0.00000000    
   0.00000000    
   0.00000000    
   0.00000000    
   0.00000000    
   0.00000000    
   0.00000000    
   0.00000000    
   0.00000000    
   0.00000000    
   0.00000000    
   0.00000000    
   0.00000000    
   0.00000000    
   0.00000000    
   0.00000000    
   0.00000000    
   0.00000000    
   0.00000000    
   0.00000000    
   0.00000000    
   0.00000000    
   0.00000000    
   0.00000000    
   0.00000000    
   0.00000000    
   0.00000000    
   0.00000000    
   0.00000000    
   0.00000000    
   0.00000000    
   0.00000000    
   0.00000000    
   0.00000000    
   0.00000000    
   0.00000000    
   0.00000000    
   0.00000000    
   0.00000000    
   0.00000000    
   0.00000000    
   0.00000000    
   0.00000000    
   0.00000000    
   0.00000000    
   0.00000000    
   0.00000000    
   0.00000000    
   0.00000000    
   0.00000000    
   0.00000000    
   0.00000000    
   0.00000000    
   0.00000000    
   0.00000000    
   0.00000000    
   0.00000000    
   0.00000000    
   0.00000000    
   0.00000000    
   0.00000000    
   0.00000000    
   0.00000000    
   0.00000000    
   0.00000000    
   0.00000000    
   0.00000000    
   0.00000000    
   0.00000000    
   0.00000000    
   0.00000000    
   0.00000000    
   0.00000000    
   0.00000000    
   0.00000000    
   0.00000000    
   0.00000000    
   0.00000000    
   0.00000000    
   0.00000000    
   0.00000000    
   0.00000000    
   0.00000000    
   0.00000000    
   0.00000000    
   0.00000000    
   0.00000000    
   0.00000000    
   0.00000000    
   0.00000000    
   0.00000000    
   0.00000000    
   0.00000000    
   0.00000000    
   0.00000000    
   0.00000000    
   0.00000000    
   0.00000000    
   0.00000000    
   0.00000000    
   0.00000000    
   0.00000000    
   0.00000000    
   0.00000000    
   0.00000000    
   0.00000000    
   0.00000000    
   0.00000000    
   0.00000000    
   0.00000000    
   0.00000000    
   0.00000000    
   0.00000000    
   0.00000000    
   0.00000000    
   0.00000000    
   0.00000000    
   0.00000000    
   0.00000000    
   0.00000000    
   0.00000000    
   0.00000000    
   0.00000000    
   0.00000000    
   0.00000000    
   0.00000000    
   0.00000000    
   0.00000000    
   0.00000000    
   0.00000000    
   0.00000000    
   0.00000000    
   0.00000000    
   0.00000000    
   0.00000000    
   0.00000000    
   0.00000000    
   0.00000000    
   0.00000000    
   0.00000000    
   0.00000000    
   0.00000000    
   0.00000000    
   0.00000000    
   0.00000000    
   0.00000000    
   0.00000000    
   0.00000000    
   0.00000000    
   0.00000000    
   0.00000000    
   0.00000000    
   0.00000000    
   0.00000000    
   0.00000000    
   0.00000000    
   0.00000000    
   0.00000000    
   0.00000000    
   0.00000000    
   0.00000000    
   0.00000000    
   0.00000000    
   0.00000000    
   0.00000000    
   0.00000000    
   0.00000000    
   0.00000000    
   0.00000000    
   0.00000000    
   0.00000000    
   0.00000000    
   0.00000000    
   0.00000000    
   0.00000000    
   0.00000000    
   0.00000000    
   0.00000000    
   0.00000000    
   0.00000000    
   0.00000000    
   0.00000000    
   0.00000000    
   0.00000000    
   0.00000000    
   0.00000000    
   0.00000000    
   0.00000000    
   0.00000000    
   0.00000000    
   0.00000000    
   0.00000000    
   0.00000000    
   0.00000000    
   0.00000000    
   0.00000000    
   0.00000000    
   0.00000000    
   0.00000000    
   0.00000000    
   0.00000000    
   0.00000000    
   0.00000000    
   0.00000000    
   0.00000000    
   0.00000000    
   0.00000000    
   0.00000000    
   0.00000000    
   0.00000000    
   0.00000000    
   0.00000000    
   0.00000000    
   0.00000000    
   0.00000000    
   0.00000000    
   0.00000000    
   0.00000000    
   0.00000000    
   0.00000000    
   0.00000000    
   0.00000000    
   0.00000000    
   0.00000000    
   0.00000000    
   0.00000000    
   0.00000000    
   0.00000000    
   0.00000000    
   0.00000000    
   0.00000000    
   0.00000000    
   0.00000000    
   0.00000000    
   0.00000000    
   0.00000000    
   0.00000000    
   0.00000000    
   0.00000000    
   0.00000000    
   0.00000000    
   0.00000000    
   0.00000000    
   0.00000000    
   0.00000000    
   0.00000000    
   0.00000000    
   0.00000000    
   0.00000000    
   0.00000000    
   0.00000000    
   0.00000000    
   0.00000000    
   0.00000000    
   0.00000000    
   0.00000000    
   0.00000000    
   0.00000000    
   0.00000000    
   0.00000000    
   0.00000000    
   0.00000000    
   0.00000000    
   0.00000000    
   0.00000000    
   0.00000000    
   0.00000000    
   0.00000000    
   0.00000000    
   0.00000000    
   0.00000000    
   0.00000000    
   0.00000000    
   0.00000000    
   0.00000000    
   0.00000000    
   0.00000000    
   0.00000000    
   0.00000000    
   0.00000000    
   0.00000000    
   0.00000000    
   0.00000000    
   0.00000000    
   0.00000000    
   0.00000000    
   0.00000000    
   0.00000000    
   0.00000000    
   0.00000000    
   0.00000000    
   0.00000000    
   0.00000000    
   0.00000000    
   0.00000000    
   0.00000000    
   0.00000000    
   0.00000000    
   0.00000000    
   0.00000000    
   0.00000000    
   0.00000000    
   0.00000000    
   0.00000000    
   0.00000000    
   0.00000000    
   0.00000000    
   0.00000000    
   0.00000000    
   0.00000000    
   0.00000000    
   0.00000000    
   0.00000000    
   0.00000000    
   0.00000000    
   0.00000000    
   0.00000000    
   0.00000000    
   0.00000000    
   0.00000000    
   0.00000000    
   0.00000000    
   0.00000000    
   0.00000000    
   0.00000000    
   0.00000000    
   0.00000000    
   0.00000000    
   0.00000000    
   0.00000000    
   0.00000000    
   0.00000000    
   0.00000000    
   0.00000000    
   0.00000000    
   0.00000000    
   0.00000000    
   0.00000000    
   0.00000000    
   0.00000000    
   0.00000000    
   0.00000000    
   0.00000000    
   0.00000000    
   0.00000000    
   0.00000000    
   0.00000000    
   0.00000000    
   0.00000000    
   0.00000000    
   0.00000000    
   0.00000000    
   0.00000000    
   0.00000000    
   0.00000000    
   0.00000000    
   0.00000000    
   0.00000000    
   0.00000000    
   0.00000000    
   0.00000000    
   0.00000000    
   0.00000000    
   0.00000000    
   0.00000000    
   0.00000000    
   0.00000000    
   0.00000000    
   0.00000000    
   0.00000000    
   0.00000000    
   0.00000000    
   0.00000000    
   0.00000000    
   0.00000000    
   0.00000000    
   0.00000000    
   0.00000000    
   0.00000000    
   0.00000000    
   0.00000000    
   0.00000000    
   0.00000000    
   0.00000000    
   0.00000000    
   0.00000000    
   0.00000000    
   0.00000000    
   0.00000000    
   0.00000000    
   0.00000000    
   0.00000000    
   0.00000000    
   0.00000000    
   0.00000000    
   0.00000000    
   0.00000000    
   0.00000000    
   0.00000000    
   0.00000000    
   0.00000000    
   0.00000000    
   0.00000000    
   0.00000000    
   0.00000000    
   0.00000000    
   0.00000000    
   0.00000000    
   0.00000000    
   0.00000000    
   0.00000000    
   1.00000000    
   0.00000000    
   0.00000000    
   0.00000000    
   0.00000000    
   0.00000000    
   0.00000000    
   0.00000000    
   0.00000000    
   0.00000000    
   0.00000000    
   0.00000000    
   0.00000000    
   0.00000000    
   0.00000000    
   0.00000000    
   0.00000000    
   0.00000000    
   0.00000000    
   0.00000000    
   0.00000000    
   0.00000000    
   0.00000000    
   0.00000000    
   0.00000000    
   0.00000000    
   0.00000000    
   0.00000000    
   0.00000000    
   0.00000000    
   0.00000000    
   0.00000000    
   0.00000000    
   0.00000000    
   0.00000000    
   0.00000000    
   0.00000000    
   0.00000000    
   0.00000000    
   0.00000000    
   0.00000000    
   0.00000000    
   0.00000000    
   0.00000000    
   0.00000000    
   0.00000000    
   0.00000000    
   0.00000000    
   0.00000000    
   0.00000000    
   0.00000000    
   0.00000000    
   0.00000000    
   0.00000000    
   0.00000000    
   0.00000000    
   0.00000000    
   0.00000000    
   0.00000000    
   0.00000000    
   0.00000000    
   0.00000000    
   0.00000000    
   0.00000000    
   0.00000000    
   2.00000000    
   0.00000000    
   0.00000000    
   0.00000000    
   0.00000000    
   0.00000000    
   0.00000000    
   0.00000000    
   0.00000000    
   0.00000000    
   0.00000000    
   0.00000000    
   0.00000000    
   0.00000000    
   0.00000000    
   0.00000000    
   0.00000000    
   0.00000000    
   0.00000000    
   0.00000000    
   0.00000000    
   0.00000000    
   0.00000000    
   0.00000000    
   0.00000000    
   0.00000000    
   0.00000000    
   0.00000000    
   0.00000000    
   0.00000000    
   0.00000000    
   0.00000000    
   0.00000000    
   0.00000000    
   0.00000000    
   0.00000000    
   0.00000000    
   0.00000000    
   0.00000000    
   0.00000000    
   0.00000000    
   0.00000000    
   0.00000000    
   0.00000000    
   0.00000000    
   0.00000000    
   0.00000000    
   0.00000000    
   0.00000000    
   0.00000000    
   0.00000000    
   0.00000000    
   0.00000000    
   0.00000000    
   0.00000000    
   0.00000000    
   0.00000000    
   0.00000000    
   0.00000000    
   0.00000000    
   0.00000000    
   0.00000000    
   0.00000000    
   1.00000000    
   0.00000000    
   0.00000000    
   0.00000000    
   1.00000000    
   0.00000000    
   1.00000000    
   0.00000000    
   1.00000000    
   0.00000000    
   1.00000000    
   0.00000000    
   0.00000000    
   0.00000000    
   0.00000000    
   0.00000000    
   0.00000000    
   0.00000000    
   0.00000000    
   0.00000000    
   0.00000000    
   0.00000000    
   0.00000000    
   0.00000000    
   0.00000000    
   0.00000000    
   0.00000000    
   0.00000000    
   0.00000000    
   0.00000000    
   0.00000000    
   0.00000000    
   0.00000000    
   0.00000000    
   0.00000000    
   0.00000000    
   0.00000000    
   0.00000000    
   0.00000000    
   0.00000000    
   0.00000000    
   0.00000000    
   0.00000000    
   0.00000000    
   0.00000000    
   0.00000000    
   0.00000000    
   0.00000000    
   0.00000000    
   0.00000000    
   0.00000000    
   0.00000000    
   0.00000000    
   0.00000000    
   0.00000000    
   0.00000000    
   0.00000000    
   0.00000000    
   0.00000000    
   0.00000000    
   0.00000000    
   0.00000000    
   1.00000000    
   0.00000000    
   0.00000000    
   1.00000000    
   0.00000000    
   1.00000000    
   0.00000000    
   0.00000000    
   2.00000000    
   3.00000000    
   0.00000000    
   1.00000000    
   1.00000000    
   0.00000000    
   0.00000000    
   0.00000000    
   0.00000000    
   0.00000000    
   0.00000000    
   0.00000000    
   0.00000000    
   0.00000000    
   0.00000000    
   0.00000000    
   0.00000000    
   0.00000000    
   0.00000000    
   0.00000000    
   0.00000000    
   0.00000000    
   0.00000000    
   0.00000000    
   0.00000000    
   0.00000000    
   0.00000000    
   0.00000000    
   0.00000000    
   0.00000000    
   0.00000000    
   0.00000000    
   0.00000000    
   0.00000000    
   0.00000000    
   0.00000000    
   0.00000000    
   0.00000000    
   0.00000000    
   0.00000000    
   0.00000000    
   0.00000000    
   0.00000000    
   0.00000000    
   0.00000000    
   0.00000000    
   0.00000000    
   0.00000000    
   0.00000000    
   0.00000000    
   0.00000000    
   0.00000000    
   0.00000000    
   0.00000000    
   1.00000000    
   1.00000000    
   0.00000000    
   1.00000000    
   2.00000000    
   1.00000000    
   2.00000000    
   2.00000000    
   2.00000000    
   0.00000000    
   1.00000000    
   1.00000000    
   0.00000000    
   0.00000000    
   0.00000000    
   0.00000000    
   0.00000000    
   0.00000000    
   0.00000000    
   0.00000000    
   0.00000000    
   0.00000000    
   0.00000000    
   0.00000000    
   0.00000000    
   0.00000000    
   0.00000000    
   0.00000000    
   0.00000000    
   0.00000000    
   0.00000000    
   0.00000000    
   0.00000000    
   0.00000000    
   0.00000000    
   0.00000000    
   0.00000000    
   0.00000000    
   0.00000000    
   0.00000000    
   0.00000000    
   0.00000000    
   0.00000000    
   0.00000000    
   0.00000000    
   0.00000000    
   0.00000000    
   0.00000000    
   0.00000000    
   0.00000000    
   0.00000000    
   0.00000000    
   0.00000000    
   0.00000000    
   0.00000000    
   0.00000000    
   0.00000000    
   0.00000000    
   0.00000000    
   0.00000000    
   0.00000000    
   0.00000000    
   0.00000000    
   0.00000000    
   0.00000000    
   1.00000000    
   0.00000000    
   2.00000000    
   1.00000000    
   0.00000000    
   0.00000000    
   0.00000000    
   0.00000000    
   0.00000000    
   0.00000000    
   0.00000000    
   2.00000000    
   0.00000000    
   0.00000000    
   0.00000000    
   0.00000000    
   0.00000000    
   0.00000000    
   0.00000000    
   0.00000000    
   0.00000000    
   0.00000000    
   0.00000000    
   0.00000000    
   0.00000000    
   0.00000000    
   0.00000000    
   0.00000000    
   0.00000000    
   0.00000000    
   0.00000000    
   0.00000000    
   0.00000000    
   0.00000000    
   0.00000000    
   0.00000000    
   0.00000000    
   0.00000000    
   0.00000000    
   0.00000000    
   0.00000000    
   0.00000000    
   0.00000000    
   0.00000000    
   0.00000000    
   0.00000000    
   0.00000000    
   0.00000000    
   0.00000000    
   0.00000000    
   0.00000000    
   0.00000000    
   0.00000000    
   0.00000000    
   0.00000000    
   0.00000000    
   0.00000000    
   0.00000000    
   0.00000000    
   0.00000000    
   0.00000000    
   0.00000000    
   0.00000000    
   1.00000000    
   0.00000000    
   0.00000000    
   1.00000000    
   0.00000000    
   1.00000000    
   0.00000000    
   0.00000000    
   0.00000000    
   0.00000000    
   2.00000000    
   3.00000000    
   1.00000000    
   0.00000000    
   0.00000000    
   0.00000000    
   0.00000000    
   0.00000000    
   0.00000000    
   0.00000000    
   0.00000000    
   0.00000000    
   0.00000000    
   0.00000000    
   0.00000000    
   0.00000000    
   0.00000000    
   0.00000000    
   0.00000000    
   0.00000000    
   0.00000000    
   0.00000000    
   0.00000000    
   0.00000000    
   0.00000000    
   0.00000000    
   0.00000000    
   0.00000000    
   0.00000000    
   0.00000000    
   0.00000000    
   0.00000000    
   0.00000000    
   0.00000000    
   0.00000000    
   0.00000000    
   0.00000000    
   0.00000000    
   0.00000000    
   0.00000000    
   0.00000000    
   0.00000000    
   0.00000000    
   0.00000000    
   0.00000000    
   0.00000000    
   0.00000000    
   0.00000000    
   0.00000000    
   0.00000000    
   0.00000000    
   0.00000000    
   0.00000000    
   0.00000000    
   2.00000000    
   0.00000000    
   0.00000000    
   0.00000000    
   0.00000000    
   0.00000000    
   1.00000000    
   0.00000000    
   0.00000000    
   0.00000000    
   0.00000000    
   0.00000000    
   1.00000000    
   2.00000000    
   0.00000000    
   0.00000000    
   0.00000000    
   0.00000000    
   0.00000000    
   0.00000000    
   0.00000000    
   0.00000000    
   0.00000000    
   0.00000000    
   0.00000000    
   0.00000000    
   0.00000000    
   0.00000000    
   0.00000000    
   0.00000000    
   0.00000000    
   0.00000000    
   0.00000000    
   0.00000000    
   0.00000000    
   0.00000000    
   0.00000000    
   0.00000000    
   0.00000000    
   0.00000000    
   0.00000000    
   0.00000000    
   0.00000000    
   0.00000000    
   0.00000000    
   0.00000000    
   0.00000000    
   0.00000000    
   0.00000000    
   0.00000000    
   0.00000000    
   0.00000000    
   0.00000000    
   0.00000000    
   0.00000000    
   0.00000000    
   0.00000000    
   0.00000000    
   0.00000000    
   0.00000000    
   0.00000000    
   0.00000000    
   0.00000000    
   0.00000000    
   0.00000000    
   0.00000000    
   0.00000000    
   0.00000000    
   0.00000000    
   1.00000000    
   0.00000000    
   0.00000000    
   1.00000000    
   0.00000000    
   0.00000000    
   0.00000000    
   0.00000000    
   1.00000000    
   0.00000000    
   0.00000000    
   0.00000000    
   0.00000000    
   0.00000000    
   0.00000000    
   0.00000000    
   0.00000000    
   0.00000000    
   0.00000000    
   0.00000000    
   0.00000000    
   0.00000000    
   0.00000000    
   0.00000000    
   0.00000000    
   0.00000000    
   0.00000000    
   0.00000000    
   0.00000000    
   0.00000000    
   0.00000000    
   0.00000000    
   0.00000000    
   0.00000000    
   0.00000000    
   0.00000000    
   0.00000000    
   0.00000000    
   0.00000000    
   0.00000000    
   0.00000000    
   0.00000000    
   0.00000000    
   0.00000000    
   0.00000000    
   0.00000000    
   0.00000000    
   0.00000000    
   0.00000000    
   0.00000000    
   0.00000000    
   0.00000000    
   0.00000000    
   0.00000000    
   0.00000000    
   0.00000000    
   0.00000000    
   0.00000000    
   0.00000000    
   0.00000000    
   0.00000000    
   0.00000000    
   0.00000000    
   0.00000000    
   1.00000000    
   2.00000000    
   0.00000000    
   1.00000000    
   0.00000000    
   2.00000000    
   0.00000000    
   2.00000000    
   0.00000000    
   0.00000000    
   0.00000000    
   0.00000000    
   0.00000000    
   0.00000000    
   0.00000000    
   0.00000000    
   0.00000000    
   0.00000000    
   0.00000000    
   0.00000000    
   0.00000000    
   0.00000000    
   0.00000000    
   0.00000000    
   0.00000000    
   0.00000000    
   0.00000000    
   0.00000000    
   0.00000000    
   0.00000000    
   0.00000000    
   0.00000000    
   0.00000000    
   0.00000000    
   0.00000000    
   0.00000000    
   0.00000000    
   0.00000000    
   0.00000000    
   0.00000000    
   0.00000000    
   0.00000000    
   0.00000000    
   0.00000000    
   0.00000000    
   0.00000000    
   0.00000000    
   0.00000000    
   0.00000000    
   0.00000000    
   0.00000000    
   0.00000000    
   0.00000000    
   0.00000000    
   0.00000000    
   0.00000000    
   0.00000000    
   0.00000000    
   0.00000000    
   0.00000000    
   1.00000000    
   1.00000000    
   2.00000000    
   1.00000000    
   1.00000000    
   1.00000000    
   0.00000000    
   1.00000000    
   0.00000000    
   0.00000000    
   0.00000000    
   1.00000000    
   1.00000000    
   0.00000000    
   0.00000000    
   0.00000000    
   0.00000000    
   0.00000000    
   0.00000000    
   0.00000000    
   0.00000000    
   0.00000000    
   0.00000000    
   0.00000000    
   0.00000000    
   0.00000000    
   0.00000000    
   0.00000000    
   0.00000000    
   0.00000000    
   0.00000000    
   0.00000000    
   0.00000000    
   0.00000000    
   0.00000000    
   0.00000000    
   0.00000000    
   0.00000000    
   0.00000000    
   0.00000000    
   0.00000000    
   0.00000000    
   0.00000000    
   0.00000000    
   0.00000000    
   0.00000000    
   0.00000000    
   0.00000000    
   0.00000000    
   0.00000000    
   0.00000000    
   0.00000000    
   0.00000000    
   0.00000000    
   0.00000000    
   0.00000000    
   0.00000000    
   0.00000000    
   0.00000000    
   0.00000000    
   0.00000000    
   0.00000000    
   0.00000000    
   0.00000000    
   0.00000000    
   0.00000000    
   1.00000000    
   0.00000000    
   0.00000000    
   3.00000000    
   0.00000000    
   1.00000000    
   0.00000000    
   0.00000000    
   0.00000000    
   0.00000000    
   1.00000000    
   0.00000000    
   0.00000000    
   0.00000000    
   0.00000000    
   0.00000000    
   0.00000000    
   0.00000000    
   0.00000000    
   0.00000000    
   0.00000000    
   0.00000000    
   0.00000000    
   0.00000000    
   0.00000000    
   0.00000000    
   0.00000000    
   0.00000000    
   0.00000000    
   0.00000000    
   0.00000000    
   0.00000000    
   0.00000000    
   0.00000000    
   0.00000000    
   0.00000000    
   0.00000000    
   0.00000000    
   0.00000000    
   0.00000000    
   0.00000000    
   0.00000000    
   0.00000000    
   0.00000000    
   0.00000000    
   0.00000000    
   0.00000000    
   0.00000000    
   0.00000000    
   0.00000000    
   0.00000000    
   0.00000000    
   0.00000000    
   0.00000000    
   0.00000000    
   0.00000000    
   0.00000000    
   0.00000000    
   0.00000000    
   0.00000000    
   0.00000000    
   0.00000000    
   0.00000000    
   1.00000000    
   0.00000000    
   0.00000000    
   1.00000000    
   0.00000000    
   2.00000000    
   1.00000000    
   1.00000000    
   0.00000000    
   0.00000000    
   1.00000000    
   0.00000000    
   0.00000000    
   0.00000000    
   0.00000000    
   0.00000000    
   0.00000000    
   0.00000000    
   0.00000000    
   0.00000000    
   0.00000000    
   0.00000000    
   0.00000000    
   0.00000000    
   0.00000000    
   0.00000000    
   0.00000000    
   0.00000000    
   0.00000000    
   0.00000000    
   0.00000000    
   0.00000000    
   0.00000000    
   0.00000000    
   0.00000000    
   0.00000000    
   0.00000000    
   0.00000000    
   0.00000000    
   0.00000000    
   0.00000000    
   0.00000000    
   0.00000000    
   0.00000000    
   0.00000000    
   0.00000000    
   0.00000000    
   0.00000000    
   0.00000000    
   0.00000000    
   0.00000000    
   0.00000000    
   0.00000000    
   0.00000000    
   0.00000000    
   0.00000000    
   0.00000000    
   0.00000000    
   0.00000000    
   0.00000000    
   0.00000000    
   0.00000000    
   0.00000000    
   1.00000000    
   0.00000000    
   2.00000000    
   0.00000000    
   0.00000000    
   1.00000000    
   1.00000000    
   2.00000000    
   0.00000000    
   0.00000000    
   0.00000000    
   0.00000000    
   0.00000000    
   0.00000000    
   0.00000000    
   0.00000000    
   0.00000000    
   0.00000000    
   0.00000000    
   0.00000000    
   0.00000000    
   0.00000000    
   0.00000000    
   0.00000000    
   0.00000000    
   0.00000000    
   0.00000000    
   0.00000000    
   0.00000000    
   0.00000000    
   0.00000000    
   0.00000000    
   0.00000000    
   0.00000000    
   0.00000000    
   0.00000000    
   0.00000000    
   0.00000000    
   0.00000000    
   0.00000000    
   0.00000000    
   0.00000000    
   0.00000000    
   0.00000000    
   0.00000000    
   0.00000000    
   0.00000000    
   0.00000000    
   0.00000000    
   0.00000000    
   0.00000000    
   0.00000000    
   0.00000000    
   0.00000000    
   0.00000000    
   0.00000000    
   0.00000000    
   0.00000000    
   0.00000000    
   0.00000000    
   0.00000000    
   0.00000000    
   0.00000000    
   0.00000000    
   0.00000000    
   0.00000000    
   1.00000000    
   0.00000000    
   0.00000000    
   0.00000000    
   0.00000000    
   0.00000000    
   0.00000000    
   0.00000000    
   0.00000000    
   0.00000000    
   0.00000000    
   0.00000000    
   0.00000000    
   0.00000000    
   0.00000000    
   0.00000000    
   0.00000000    
   0.00000000    
   0.00000000    
   0.00000000    
   0.00000000    
   0.00000000    
   0.00000000    
   0.00000000    
   0.00000000    
   0.00000000    
   0.00000000    
   0.00000000    
   0.00000000    
   0.00000000    
   0.00000000    
   0.00000000    
   0.00000000    
   0.00000000    
   0.00000000    
   0.00000000    
   0.00000000    
   0.00000000    
   0.00000000    
   0.00000000    
   0.00000000    
   0.00000000    
   0.00000000    
   0.00000000    
   0.00000000    
   0.00000000    
   0.00000000    
   0.00000000    
   0.00000000    
   0.00000000    
   0.00000000    
   0.00000000    
   0.00000000    
   0.00000000    
   0.00000000    
   0.00000000    
   0.00000000    
   0.00000000    
   0.00000000    
   0.00000000    
   0.00000000    
   0.00000000    
   0.00000000    
   0.00000000    
   0.00000000    
   0.00000000    
   0.00000000    
   0.00000000    
   0.00000000    
   1.00000000    
   0.00000000    
   1.00000000    
   0.00000000    
   0.00000000    
   0.00000000    
   0.00000000    
   0.00000000    
   0.00000000    
   0.00000000    
   0.00000000    
   0.00000000    
   0.00000000    
   0.00000000    
   0.00000000    
   0.00000000    
   0.00000000    
   0.00000000    
   0.00000000    
   0.00000000    
   0.00000000    
   0.00000000    
   0.00000000    
   0.00000000    
   0.00000000    
   0.00000000    
   0.00000000    
   0.00000000    
   0.00000000    
   0.00000000    
   0.00000000    
   0.00000000    
   0.00000000    
   0.00000000    
   0.00000000    
   0.00000000    
   0.00000000    
   0.00000000    
   0.00000000    
   0.00000000    
   0.00000000    
   0.00000000    
   0.00000000    
   0.00000000    
   0.00000000    
   0.00000000    
   0.00000000    
   0.00000000    
   0.00000000    
   0.00000000    
   0.00000000    
   0.00000000    
   0.00000000    
   0.00000000    
   0.00000000    
   0.00000000    
   0.00000000    
   0.00000000    
   0.00000000    
   0.00000000    
   0.00000000    
   0.00000000    
   0.00000000    
   0.00000000    
   0.00000000    
   0.00000000    
   0.00000000    
   0.00000000    
   0.00000000    
   0.00000000    
   0.00000000    
   0.00000000    
   0.00000000    
   0.00000000    
   0.00000000    
   0.00000000    
   0.00000000    
   0.00000000    
   0.00000000    
   0.00000000    
   0.00000000    
   0.00000000    
   0.00000000    
   0.00000000    
   0.00000000    
   0.00000000    
   0.00000000    
   0.00000000    
   0.00000000    
   0.00000000    
   0.00000000    
   0.00000000    
   0.00000000    
   0.00000000    
   0.00000000    
   0.00000000    
   0.00000000    
   0.00000000    
   0.00000000    
   0.00000000    
   0.00000000    
   0.00000000    
   0.00000000    
   0.00000000    
   0.00000000    
   0.00000000    
   0.00000000    
   0.00000000    
   0.00000000    
   0.00000000    
   0.00000000    
   0.00000000    
   0.00000000    
   0.00000000    
   0.00000000    
   0.00000000    
   0.00000000    
   0.00000000    
   0.00000000    
   0.00000000    
   0.00000000    
   0.00000000    
   0.00000000    
   0.00000000    
   0.00000000    
   0.00000000    
   0.00000000    
   0.00000000    
   0.00000000    
   0.00000000    
   0.00000000    
   0.00000000    
   0.00000000    
   0.00000000    
   0.00000000    
   0.00000000    
   0.00000000    
   0.00000000    
   0.00000000    
   0.00000000    
   0.00000000    
   0.00000000    
   0.00000000    
   0.00000000    
   0.00000000    
   0.00000000    
   0.00000000    
   0.00000000    
   0.00000000    
   0.00000000    
   0.00000000    
   0.00000000    
   0.00000000    
   0.00000000    
   0.00000000    
   0.00000000    
   0.00000000    
   0.00000000    
   0.00000000    
   0.00000000    
   0.00000000    
   0.00000000    
   0.00000000    
   0.00000000    
   0.00000000    
   0.00000000    
   0.00000000    
   0.00000000    
   0.00000000    
   0.00000000    
   0.00000000    
   0.00000000    
   0.00000000    
   0.00000000    
   0.00000000    
   0.00000000    
   0.00000000    
   0.00000000    
   0.00000000    
   0.00000000    
   0.00000000    
   0.00000000    
   0.00000000    
   0.00000000    
   0.00000000    
   0.00000000    
   0.00000000    
   0.00000000    
   0.00000000    
   0.00000000    
   0.00000000    
   0.00000000    
   0.00000000    
   0.00000000    
   0.00000000    
   0.00000000    
   0.00000000    
   0.00000000    
   0.00000000    
   0.00000000    
   0.00000000    
   0.00000000    
   0.00000000    
   0.00000000    
   0.00000000    
   0.00000000    
   0.00000000    
   0.00000000    
   0.00000000    
   0.00000000    
   0.00000000    
   0.00000000    
   0.00000000    
   0.00000000    
   0.00000000    
   0.00000000    
   0.00000000    
   0.00000000    
   0.00000000    
   0.00000000    
   0.00000000    
   0.00000000    
   0.00000000    
   0.00000000    
   0.00000000    
   0.00000000    
   0.00000000    
   0.00000000    
   0.00000000    
   0.00000000    
   0.00000000    
   0.00000000    
   0.00000000    
   0.00000000    
   0.00000000    
   0.00000000    
   0.00000000    
   0.00000000    
   0.00000000    
   0.00000000    
   0.00000000    
   0.00000000    
   0.00000000    
   0.00000000    
   0.00000000    
   0.00000000    
   0.00000000    
   0.00000000    
   0.00000000    
   0.00000000    
   0.00000000    
   0.00000000    
   0.00000000    
   0.00000000    
   0.00000000    
   0.00000000    
   0.00000000    
   0.00000000    
   0.00000000    
   0.00000000    
   0.00000000    
   0.00000000    
   0.00000000    
   0.00000000    
   0.00000000    
   0.00000000    
   0.00000000    
   0.00000000    
   0.00000000    
   0.00000000    
   0.00000000    
   0.00000000    
   0.00000000    
   0.00000000    
   0.00000000    
   0.00000000    
   0.00000000    
   0.00000000    
   0.00000000    
   0.00000000    
   0.00000000    
   0.00000000    
   0.00000000    
   0.00000000    
   0.00000000    
   0.00000000    
   0.00000000    
   0.00000000    
   0.00000000    
   0.00000000    
   0.00000000    
   0.00000000    
   0.00000000    
   0.00000000    
   0.00000000    
   0.00000000    
   0.00000000    
   0.00000000    
   0.00000000    
   0.00000000    
   0.00000000    
   0.00000000    
   0.00000000    
   0.00000000    
   0.00000000    
   0.00000000    
   0.00000000    
   0.00000000    
   0.00000000    
   0.00000000    
   0.00000000    
   0.00000000    
   0.00000000    
   0.00000000    
   0.00000000    
   0.00000000    
   0.00000000    
   0.00000000    
   0.00000000    
   0.00000000    
   0.00000000    
   0.00000000    
   0.00000000    
   0.00000000    
   0.00000000    
   0.00000000    
   0.00000000    
   0.00000000    
   0.00000000    
   0.00000000    
   0.00000000    
   0.00000000    
   0.00000000    
   0.00000000    
   0.00000000    
   0.00000000    
   0.00000000    
   0.00000000    
   0.00000000    
   0.00000000    
   0.00000000    
   0.00000000    
   0.00000000    
   0.00000000    
   0.00000000    
   0.00000000    
   0.00000000    
   0.00000000    
   0.00000000    
   0.00000000    
   0.00000000    
   0.00000000    
   0.00000000    
   0.00000000    
   0.00000000    
   0.00000000    
   0.00000000    
   0.00000000    
   0.00000000    
   0.00000000    
   0.00000000    
   0.00000000    
   0.00000000    
   0.00000000    
   0.00000000    
   0.00000000    
   0.00000000    
   0.00000000    
   0.00000000    
   0.00000000    
   0.00000000    
   0.00000000    
   0.00000000    
   0.00000000    
   0.00000000    
   0.00000000    
   0.00000000    
   0.00000000    
   0.00000000    
   0.00000000    
   0.00000000    
   0.00000000    
   0.00000000    
   0.00000000    
   0.00000000    
   0.00000000    
   0.00000000    
   0.00000000    
   0.00000000    
   0.00000000    
   0.00000000    
   0.00000000    
   0.00000000    
   0.00000000    
   0.00000000    
   0.00000000    
   0.00000000    
   0.00000000    
   0.00000000    
   0.00000000    
   0.00000000    
   0.00000000    
   0.00000000    
   0.00000000    
   0.00000000    
   0.00000000    
   0.00000000    
   0.00000000    
   0.00000000    
   0.00000000    
   0.00000000    
   0.00000000    
   0.00000000    
   0.00000000    
   0.00000000    
   0.00000000    
   0.00000000    
   0.00000000    
   0.00000000    
   0.00000000    
   0.00000000    
   0.00000000    
   0.00000000    
   0.00000000    
   0.00000000    
   0.00000000    
   0.00000000    
   0.00000000    
   0.00000000    
   0.00000000    
   0.00000000    
   0.00000000    
   0.00000000    
   0.00000000    
   0.00000000    
   0.00000000    
   0.00000000    
   0.00000000    
   0.00000000    
   0.00000000    
   0.00000000    
   0.00000000    
   0.00000000    
   0.00000000    
   0.00000000    
   0.00000000    
   0.00000000    
   0.00000000    
   0.00000000    
   0.00000000    
   0.00000000    
   0.00000000    
   0.00000000    
   0.00000000    
   0.00000000    
   0.00000000    
   0.00000000    
   0.00000000    
   0.00000000    
   0.00000000    
   0.00000000    
   0.00000000    
   0.00000000    
   0.00000000    
   0.00000000    
   0.00000000    
   0.00000000    
   0.00000000    
   0.00000000    
   0.00000000    
   0.00000000    
   0.00000000    
   0.00000000    
   0.00000000    
   0.00000000    
   0.00000000    
   0.00000000    
   0.00000000    
   0.00000000    
   0.00000000    
   0.00000000    
   0.00000000    
   0.00000000    
   0.00000000    
   0.00000000    
   0.00000000    
   0.00000000    
   0.00000000    
   0.00000000    
   0.00000000    
   0.00000000    
   0.00000000    
   0.00000000    
   0.00000000    
   0.00000000    
   0.00000000    
   0.00000000    
   0.00000000    
   0.00000000    
   0.00000000    
   0.00000000    
   0.00000000    
   0.00000000    
   0.00000000    
   0.00000000    
   0.00000000    
   0.00000000    
   0.00000000    
   0.00000000    
   0.00000000    
   0.00000000    
   0.00000000    
   0.00000000    
   0.00000000    
   0.00000000    
   0.00000000    
   0.00000000    
   0.00000000    
   0.00000000    
   0.00000000    
   0.00000000    
   0.00000000    
   0.00000000    
   0.00000000    
   0.00000000    
   0.00000000    
   0.00000000    
   0.00000000    
   0.00000000    
   0.00000000    
   0.00000000    
   0.00000000    
   0.00000000    
   0.00000000    
   0.00000000    
   0.00000000    
   0.00000000    
   0.00000000    
   0.00000000    
   0.00000000    
   0.00000000    
   0.00000000    
   0.00000000    
   0.00000000    
   0.00000000    
   0.00000000    
   0.00000000    
   0.00000000    
   0.00000000    
   0.00000000    
   0.00000000    
   0.00000000    
   0.00000000    
   0.00000000    
   0.00000000    
   0.00000000    
   0.00000000    
   0.00000000    
   0.00000000    
   0.00000000    
   0.00000000    
   0.00000000    
   0.00000000    
   0.00000000    
   0.00000000    
   0.00000000    
   0.00000000    
   0.00000000    
   0.00000000    
   0.00000000    
   0.00000000    
   0.00000000    
   0.00000000    
   0.00000000    
   0.00000000    
   0.00000000    
   0.00000000    
   0.00000000    
   0.00000000    
   0.00000000    
   0.00000000    
   0.00000000    
   0.00000000    
   0.00000000    
   0.00000000    
   0.00000000    
   0.00000000    
   0.00000000    
   0.00000000    
   0.00000000    
   0.00000000    
   0.00000000    
   0.00000000    
   0.00000000    
   0.00000000    
   0.00000000    
   0.00000000    
   0.00000000    
   0.00000000    
   0.00000000    
   0.00000000    
   0.00000000    
   0.00000000    
   0.00000000    
   0.00000000    
   0.00000000    
   0.00000000    
   0.00000000    
   0.00000000    
   0.00000000    
   0.00000000    
   0.00000000    
   0.00000000    
   0.00000000    
   0.00000000    
   0.00000000    
   0.00000000    
   0.00000000    
   0.00000000    
   0.00000000    
   0.00000000    
   0.00000000    
   0.00000000    
   0.00000000    
   0.00000000    
   0.00000000    
   0.00000000    
   0.00000000    
   0.00000000    
   0.00000000    
   0.00000000    
   0.00000000    
   0.00000000    
   0.00000000    
   0.00000000    
   0.00000000    
   0.00000000    
   0.00000000    
   0.00000000    
   0.00000000    
   0.00000000    
   0.00000000    
   0.00000000    
   0.00000000    
   0.00000000    
   0.00000000    
   0.00000000    
   0.00000000    
   0.00000000    
   0.00000000    
   0.00000000    
   0.00000000    
   0.00000000    
   0.00000000    
   0.00000000    
   0.00000000    
   0.00000000    
   0.00000000    
   0.00000000    
   0.00000000    
   0.00000000    
   0.00000000    
   0.00000000    
   0.00000000    
   0.00000000    
   0.00000000    
   0.00000000    
   0.00000000    
   0.00000000    
   0.00000000    
   0.00000000    
   0.00000000    
   0.00000000    
   0.00000000    
   0.00000000    
   0.00000000    
   0.00000000    
   0.00000000    
   0.00000000    
   0.00000000    
   0.00000000    
   0.00000000    
   0.00000000    
   0.00000000    
   0.00000000    
   0.00000000    
   0.00000000    
   0.00000000    
   0.00000000    
   0.00000000    
   0.00000000    
   0.00000000    
   0.00000000    
   0.00000000    
   0.00000000    
   0.00000000    
   0.00000000    
   0.00000000    
   0.00000000    
   0.00000000    
   0.00000000    
   0.00000000    
   0.00000000    
   0.00000000    
   0.00000000    
   0.00000000    
   0.00000000    
   0.00000000    
   0.00000000    
   0.00000000    
   0.00000000    
   0.00000000    
   0.00000000    
   0.00000000    
   0.00000000    
   0.00000000    
   0.00000000    
   0.00000000    
   0.00000000    
   0.00000000    
   0.00000000    
   0.00000000    
   0.00000000    
   0.00000000    
   0.00000000    
   0.00000000    
   0.00000000    
   0.00000000    
   0.00000000    
   0.00000000    
   0.00000000    
   0.00000000    
   0.00000000    
   0.00000000    
   0.00000000    
   0.00000000    
   0.00000000    
   0.00000000    
   0.00000000    
   0.00000000    
   0.00000000    
   0.00000000    
   0.00000000    
   0.00000000    
   0.00000000    
   0.00000000    
   0.00000000    
   0.00000000    
   0.00000000    
   0.00000000    
   0.00000000    
   0.00000000    
   0.00000000    
   0.00000000    
   0.00000000    
   0.00000000    
   0.00000000    
   0.00000000    
   0.00000000    
   0.00000000    
   0.00000000    
   0.00000000    
   0.00000000    
   0.00000000    
   0.00000000    
   0.00000000    
   0.00000000    
   0.00000000    
   0.00000000    
   0.00000000    
   0.00000000    
   0.00000000    
   0.00000000    
   0.00000000    
   0.00000000    
   0.00000000    
   0.00000000    
   0.00000000    
   0.00000000    
   0.00000000    
   0.00000000    
   0.00000000    
   0.00000000    
   0.00000000    
   0.00000000    
   0.00000000    
   0.00000000    
   0.00000000    
   0.00000000    
   0.00000000    
   0.00000000    
   0.00000000    
   0.00000000    
   0.00000000    
   0.00000000    
   0.00000000    
   0.00000000    
   0.00000000    
   0.00000000    
   0.00000000    
   0.00000000    
   0.00000000    
   0.00000000    
   0.00000000    
   0.00000000    
   0.00000000    
   0.00000000    
   0.00000000    
   0.00000000    
   0.00000000    
   0.00000000    
   0.00000000    
   0.00000000    
   0.00000000    
   0.00000000    
   0.00000000    
   0.00000000    
   0.00000000    
   0.00000000    
   0.00000000    
   0.00000000    
   0.00000000    
   0.00000000    
   0.00000000    
   0.00000000    
   0.00000000    
   0.00000000    
   0.00000000    
   0.00000000    
   0.00000000    
   0.00000000    
   0.00000000    
   0.00000000    
   0.00000000    
   0.00000000    
   0.00000000    
   0.00000000    
   0.00000000    
   0.00000000    
   0.00000000    
   0.00000000    
   0.00000000    
   0.00000000    
   0.00000000    
   0.00000000    
   0.00000000    
   0.00000000    
   0.00000000    
   0.00000000    
   0.00000000    
   0.00000000    
   0.00000000    
   0.00000000    
   0.00000000    
   0.00000000    
   0.00000000    
   0.00000000    
   0.00000000    
   0.00000000    
   0.00000000    
   0.00000000    
   0.00000000    
   0.00000000    
   0.00000000    
   0.00000000    
   0.00000000    
   0.00000000    
   0.00000000    
   0.00000000    
   0.00000000    
   0.00000000    
   0.00000000    
   0.00000000    
   0.00000000    
   0.00000000    
   0.00000000    
   0.00000000    
   0.00000000    
   0.00000000    
   0.00000000    
   0.00000000    
   0.00000000    
   0.00000000    
   0.00000000    
   0.00000000    
   0.00000000    
   0.00000000    
   0.00000000    
   0.00000000    
   0.00000000    
   0.00000000    
   0.00000000    
   0.00000000    
   0.00000000    
   0.00000000    
   0.00000000    
   0.00000000    
   0.00000000    
   0.00000000    
   0.00000000    
   0.00000000    
   0.00000000    
   0.00000000    
   0.00000000    
   0.00000000    
   0.00000000    
   0.00000000    
   0.00000000    
   0.00000000    
   0.00000000    
   0.00000000    
   0.00000000    
   0.00000000    
   0.00000000    
   0.00000000    
   0.00000000    
   0.00000000    
   0.00000000    
   0.00000000    
   0.00000000    
   0.00000000    
   0.00000000    
   0.00000000    
   0.00000000    
   0.00000000    
   0.00000000    
   0.00000000    
   0.00000000    
   0.00000000    
   0.00000000    
   0.00000000    
   0.00000000    
   0.00000000    
   0.00000000    
   0.00000000    
   0.00000000    
   0.00000000    
   0.00000000    
   0.00000000    
   0.00000000    
   0.00000000    
   0.00000000    
   0.00000000    
   0.00000000    
   0.00000000    
   0.00000000    
   0.00000000    
   0.00000000    
   0.00000000    
   0.00000000    
   0.00000000    
   0.00000000    
   0.00000000    
   0.00000000    
   0.00000000    
   0.00000000    
   0.00000000    
   0.00000000    
   0.00000000    
   0.00000000    
   0.00000000    
   0.00000000    
   0.00000000    
   0.00000000    
   0.00000000    
   0.00000000    
   0.00000000    
   0.00000000    
   0.00000000    
   0.00000000    
   0.00000000    
   0.00000000    
   0.00000000    
   0.00000000    
   0.00000000    
   0.00000000    
   0.00000000    
   0.00000000    
   0.00000000    
   0.00000000    
   0.00000000    
   0.00000000    
   0.00000000    
   0.00000000    
   0.00000000    
   0.00000000    
   0.00000000    
   0.00000000    
   0.00000000    
   0.00000000    
   0.00000000    
   0.00000000    
   0.00000000    
   0.00000000    
   0.00000000    
   0.00000000    
   0.00000000    
   0.00000000    
   0.00000000    
   0.00000000    
   0.00000000    
   0.00000000    
   0.00000000    
   0.00000000    
   0.00000000    
   0.00000000    
   0.00000000    
   0.00000000    
   0.00000000    
   0.00000000    
   0.00000000    
   0.00000000    
   0.00000000    
   0.00000000    
   0.00000000    
   0.00000000    
   0.00000000    
   0.00000000    
   0.00000000    
   0.00000000    
   0.00000000    
   0.00000000    
   0.00000000    
   0.00000000    
   0.00000000    
   0.00000000    
   0.00000000    
   0.00000000    
   0.00000000    
   0.00000000    
   0.00000000    
   0.00000000    
   0.00000000    
   0.00000000    
   0.00000000    
   0.00000000    
   0.00000000    
   0.00000000    
   0.00000000    
   0.00000000    
   0.00000000    
   0.00000000    
   0.00000000    
   0.00000000    
   0.00000000    
   0.00000000    
   0.00000000    
   0.00000000    
   0.00000000    
   0.00000000    
   0.00000000    
   0.00000000    
   0.00000000    
   0.00000000    
   0.00000000    
   0.00000000    
   0.00000000    
   0.00000000    
   0.00000000    
   0.00000000    
   0.00000000    
   0.00000000    
   0.00000000    
   0.00000000    
   0.00000000    
   0.00000000    
   0.00000000    
   0.00000000    
   0.00000000    
   0.00000000    
   0.00000000    
   0.00000000    
   0.00000000    
   0.00000000    
   0.00000000    
   0.00000000    
   0.00000000    
   0.00000000    
   0.00000000    
   0.00000000    
   0.00000000    
   0.00000000    
   0.00000000    
   0.00000000    
   0.00000000    
   0.00000000    
   0.00000000    
   0.00000000    
   0.00000000    
   0.00000000    
   0.00000000    
   0.00000000    
   0.00000000    
   0.00000000    
   0.00000000    
   0.00000000    
   0.00000000    
   0.00000000    
   0.00000000    
   0.00000000    
   0.00000000    
   0.00000000    
   0.00000000    
   0.00000000    
   0.00000000    
   0.00000000    
   0.00000000    
   0.00000000    
   0.00000000    
   0.00000000    
   0.00000000    
   0.00000000    
   0.00000000    
   0.00000000    
   0.00000000    
   0.00000000    
   0.00000000    
   0.00000000    
   0.00000000    
   0.00000000    
   0.00000000    
   0.00000000    
   0.00000000    
   0.00000000    
   0.00000000    
   0.00000000    
   0.00000000    
   0.00000000    
   0.00000000    
   0.00000000    
   0.00000000    
   0.00000000    
   0.00000000    
   0.00000000    
   0.00000000    
   0.00000000    
   0.00000000    
   0.00000000    
   0.00000000    
   0.00000000    
   0.00000000    
   0.00000000    
   0.00000000    
   0.00000000    
   0.00000000    
   0.00000000    
   0.00000000    
   0.00000000    
   0.00000000    
   0.00000000    
   0.00000000    
   0.00000000    
   0.00000000    
   0.00000000    
   0.00000000    
   0.00000000    
   0.00000000    
   0.00000000    
   0.00000000    
   0.00000000    
   0.00000000    
   0.00000000    
   0.00000000    
   0.00000000    
   0.00000000    
   0.00000000    
   0.00000000    
   0.00000000    
   0.00000000    
   0.00000000    
   0.00000000    
   0.00000000    
   0.00000000    
   0.00000000    
   0.00000000    
   0.00000000    
   0.00000000    
   0.00000000    
   0.00000000    
   0.00000000    
   0.00000000    
   0.00000000    
   0.00000000    
   0.00000000    
   0.00000000    
   0.00000000    
   0.00000000    
   0.00000000    
   0.00000000    
   0.00000000    
   0.00000000    
   0.00000000    
   0.00000000    
   0.00000000    
   0.00000000    
   0.00000000    
   0.00000000    
   0.00000000    
   0.00000000    
   0.00000000    
   0.00000000    
   0.00000000    
   0.00000000    
   0.00000000    
   0.00000000    
   0.00000000    
   0.00000000    
   0.00000000    
   0.00000000    
   0.00000000    
   0.00000000    
   0.00000000    
   0.00000000    
   0.00000000    
   0.00000000    
   0.00000000    
   0.00000000    
   0.00000000    
   0.00000000    
   0.00000000    
   0.00000000    
   0.00000000    
   0.00000000    
   0.00000000    
   0.00000000    
   0.00000000    
   0.00000000    
   0.00000000    
   0.00000000    
   0.00000000    
   0.00000000    
   0.00000000    
   0.00000000    
   0.00000000    
   0.00000000    
   0.00000000    
   0.00000000    
   0.00000000    
   0.00000000    
   0.00000000    
   0.00000000    
   0.00000000    
   0.00000000    
   0.00000000    
   0.00000000    
   0.00000000    
   0.00000000    
   0.00000000    
   0.00000000    
   0.00000000    
   0.00000000    
   0.00000000    
   0.00000000    
   0.00000000    
   0.00000000    
   0.00000000    
   0.00000000    
   0.00000000    
   0.00000000    
   0.00000000    
   0.00000000    
   0.00000000    
   0.00000000    
   0.00000000    
   0.00000000    
   0.00000000    
   0.00000000    
   0.00000000    
   0.00000000    
   0.00000000    
   0.00000000    
   0.00000000    
   0.00000000    
   0.00000000    
   0.00000000    
   0.00000000    
   0.00000000    
   0.00000000    
   0.00000000    
   0.00000000    
   0.00000000    
   0.00000000    
   0.00000000    
   0.00000000    
   0.00000000    
   0.00000000    
   0.00000000    
   0.00000000    
   0.00000000    
   0.00000000    
   0.00000000    
   0.00000000    
   0.00000000    
   0.00000000    
   0.00000000    
   0.00000000    
   0.00000000    
   0.00000000    
   0.00000000    
   0.00000000    
   0.00000000    
   0.00000000    
   0.00000000    
   0.00000000    
   0.00000000    
   0.00000000    
   0.00000000    
   0.00000000    
   0.00000000    
   0.00000000    
   0.00000000    
   0.00000000    
   0.00000000    
   0.00000000    
   0.00000000    
   0.00000000    
   0.00000000    
   0.00000000    
   0.00000000    
   0.00000000    
   0.00000000    
   0.00000000    
   0.00000000    
   0.00000000    
   0.00000000    
   0.00000000    
   0.00000000    
   0.00000000    
   0.00000000    
   0.00000000    
   0.00000000    
   0.00000000    
   0.00000000    
   0.00000000    
   0.00000000    
   0.00000000    
   0.00000000    
   0.00000000    
   0.00000000    
   0.00000000    
   0.00000000    
   0.00000000    
   0.00000000    
   0.00000000    
   0.00000000    
   0.00000000    
   0.00000000    
   0.00000000    
   0.00000000    
   0.00000000    
   0.00000000    
   0.00000000    
   0.00000000    
   0.00000000    
   0.00000000    
   0.00000000    
   0.00000000    
   0.00000000    
   0.00000000    
   0.00000000    
   0.00000000    
   0.00000000    
   0.00000000    
   0.00000000    
   0.00000000    
   0.00000000    
   0.00000000    
   0.00000000    
   0.00000000    
   0.00000000    
   0.00000000    
   0.00000000    
   0.00000000    
   0.00000000    
   0.00000000    
   0.00000000    
   0.00000000    
   0.00000000    
   0.00000000    
   0.00000000    
   0.00000000    
   0.00000000    
   0.00000000    
   0.00000000    
   0.00000000    
   0.00000000    
   0.00000000    
   0.00000000    
   0.00000000    
   0.00000000    
   0.00000000    
   0.00000000    
   0.00000000    
   0.00000000    
   0.00000000    
   0.00000000    
   0.00000000    
   0.00000000    
   0.00000000    
   0.00000000    
   0.00000000    
   0.00000000    
   0.00000000    
   0.00000000    
   0.00000000    
   0.00000000    
   0.00000000    
   0.00000000    
   0.00000000    
   0.00000000    
   0.00000000    
   0.00000000    
   0.00000000    
   0.00000000    
   0.00000000    
   0.00000000    
   0.00000000    
   0.00000000    
   0.00000000    
   0.00000000    
   0.00000000    
   0.00000000    
   0.00000000    
   0.00000000    
   0.00000000    
   0.00000000    
   0.00000000    
   0.00000000    
   0.00000000    
   0.00000000    
   0.00000000    
   0.00000000    
   0.00000000    
   0.00000000    
   0.00000000    
   0.00000000    
   0.00000000    
   0.00000000    
   0.00000000    
   0.00000000    
   0.00000000    
   0.00000000    
   0.00000000    
   0.00000000    
   0.00000000    
   0.00000000    
   0.00000000    
   0.00000000    
   0.00000000    
   0.00000000    
   0.00000000    
   0.00000000    
   0.00000000    
   0.00000000    
   0.00000000    
   0.00000000    
   0.00000000    
   0.00000000    
   0.00000000    
   0.00000000    
   0.00000000    
   0.00000000    
   0.00000000    
   0.00000000    
   0.00000000    
   0.00000000    
   0.00000000    
   0.00000000    
   0.00000000    
   0.00000000    
   0.00000000    
   0.00000000    
   0.00000000    
   0.00000000    
   0.00000000    
   0.00000000    
   0.00000000    
   0.00000000    
   0.00000000    
   0.00000000    
   0.00000000    
   0.00000000    
   0.00000000    
   0.00000000    
   0.00000000    
   0.00000000    
   0.00000000    
   0.00000000    
   0.00000000    
   0.00000000    
   0.00000000    
   0.00000000    
   0.00000000    
   0.00000000    
   0.00000000    
   0.00000000    
   0.00000000    
   0.00000000    
   0.00000000    
   0.00000000    
   0.00000000    
   0.00000000    
   0.00000000    
   0.00000000    
   0.00000000    
   0.00000000    
   0.00000000    
   0.00000000    
   0.00000000    
   0.00000000    
   0.00000000    
   0.00000000    
   0.00000000    
   0.00000000    
   0.00000000    
   0.00000000    
   0.00000000    
   0.00000000    
   0.00000000    
   0.00000000    
   0.00000000    
   0.00000000    
   0.00000000    
   0.00000000    
   0.00000000    
   0.00000000    
   0.00000000    
   0.00000000    
   0.00000000    
   0.00000000    
   0.00000000    
   0.00000000    
   0.00000000    
   0.00000000    
   0.00000000    
   0.00000000    
   0.00000000    
   0.00000000    
   0.00000000    
   0.00000000    
   0.00000000    
   0.00000000    
   0.00000000    
   0.00000000    
   0.00000000    
   0.00000000    
   0.00000000    
   0.00000000    
   0.00000000    
   0.00000000    
   0.00000000    
   0.00000000    
   0.00000000    
   0.00000000    
   0.00000000    
   0.00000000    
   0.00000000    
   0.00000000    
   0.00000000    
   0.00000000    
   0.00000000    
   0.00000000    
   0.00000000    
   0.00000000    
   0.00000000    
   0.00000000    
   0.00000000    
   0.00000000    
   0.00000000    
   0.00000000    
   0.00000000    
   0.00000000    
   0.00000000    
   0.00000000    
   0.00000000    
   0.00000000    
   0.00000000    
   0.00000000    
   0.00000000    
   0.00000000    
   0.00000000    
   0.00000000    
   0.00000000    
   0.00000000    
   0.00000000    
   0.00000000    
   0.00000000    
   0.00000000    
   0.00000000    
   0.00000000    
   0.00000000    
   0.00000000    
   0.00000000    
   0.00000000    
   0.00000000    
   0.00000000    
   0.00000000    
   0.00000000    
   0.00000000    
   0.00000000    
   0.00000000    
   0.00000000    
   0.00000000    
   0.00000000    
   0.00000000    
   0.00000000    
   0.00000000    
   0.00000000    
   0.00000000    
   0.00000000    
   0.00000000    
   0.00000000    
   0.00000000    
   0.00000000    
   0.00000000    
   0.00000000    
   0.00000000    
   0.00000000    
   0.00000000    
   0.00000000    
   0.00000000    
   0.00000000    
   0.00000000    
   0.00000000    
   0.00000000    
   0.00000000    
   0.00000000    
   0.00000000    
   0.00000000    
   0.00000000    
   0.00000000    
   0.00000000    
   0.00000000    
   0.00000000    
   0.00000000    
   0.00000000    
   0.00000000    
   0.00000000    
   0.00000000    
   0.00000000    
   0.00000000    
   0.00000000    
   0.00000000    
   0.00000000    
   0.00000000    
   0.00000000    
   0.00000000    
   0.00000000    
   0.00000000    
   0.00000000    
   0.00000000    
   0.00000000    
   0.00000000    
   0.00000000    
   0.00000000    
   0.00000000    
   0.00000000    
   0.00000000    
   0.00000000    
   0.00000000    
   0.00000000    
   0.00000000    
   0.00000000    
   0.00000000    
   0.00000000    
   0.00000000    
   0.00000000    
   0.00000000    
   0.00000000    
   0.00000000    
   0.00000000    
   0.00000000    
   0.00000000    
   0.00000000    
   0.00000000    
   0.00000000    
   0.00000000    
   0.00000000    
   0.00000000    
   0.00000000    
   0.00000000    
   0.00000000    
   0.00000000    
   0.00000000    
   0.00000000    
   0.00000000    
   0.00000000    
   0.00000000    
   0.00000000    
   0.00000000    
   0.00000000    
   0.00000000    
   0.00000000    
   0.00000000    
   0.00000000    
   0.00000000    
   0.00000000    
   0.00000000    
   0.00000000    
   0.00000000    
   0.00000000    
   0.00000000    
   0.00000000    
   0.00000000    
   0.00000000    
   0.00000000    
   0.00000000    
   0.00000000    
   0.00000000    
   0.00000000    
   0.00000000    
   0.00000000    
   0.00000000    
   0.00000000    
   0.00000000    
   0.00000000    
   0.00000000    
   0.00000000    
   0.00000000    
   0.00000000    
   0.00000000    
   0.00000000    
   0.00000000    
   0.00000000    
   0.00000000    
   0.00000000    
   0.00000000    
   0.00000000    
   0.00000000    
   0.00000000    
   0.00000000    
   0.00000000    
   0.00000000    
   0.00000000    
   0.00000000    
   0.00000000    
   0.00000000    
   0.00000000    
   0.00000000    
   0.00000000    
   0.00000000    
   0.00000000    
   0.00000000    
   0.00000000    
   0.00000000    
   0.00000000    
   0.00000000    
   0.00000000    
   0.00000000    
   0.00000000    
   0.00000000    
   0.00000000    
   0.00000000    
   0.00000000    
   0.00000000    
   0.00000000    
   0.00000000    
   0.00000000    
   0.00000000    
   0.00000000    
   0.00000000    
   0.00000000    
   0.00000000    
   0.00000000    
   0.00000000    
   0.00000000    
   0.00000000    
   0.00000000    
   0.00000000    
   0.00000000    
   0.00000000    
   0.00000000    
   0.00000000    
   0.00000000    
   0.00000000    
   0.00000000    
   0.00000000    
   0.00000000    
   0.00000000    
   0.00000000    
   0.00000000    
   0.00000000    
   0.00000000    
   0.00000000    
   0.00000000    
   0.00000000    
   0.00000000    
   0.00000000    
   0.00000000    
   0.00000000    
   0.00000000    
   0.00000000    
   0.00000000    
   0.00000000    
   0.00000000    
   0.00000000    
   0.00000000    
   0.00000000    
   0.00000000    
   0.00000000    
   0.00000000    
   0.00000000    
   0.00000000    
   0.00000000    
   0.00000000    
   0.00000000    
   0.00000000    
   0.00000000    
   0.00000000    
   0.00000000    
   0.00000000    
   0.00000000    
   0.00000000    
   0.00000000    
   0.00000000    
   0.00000000    
   0.00000000    
   0.00000000    
   0.00000000    
   0.00000000    
   0.00000000    
   0.00000000    
   0.00000000    
   0.00000000    
   0.00000000    
   0.00000000    
   0.00000000    
   0.00000000    
   0.00000000    
   0.00000000    
   0.00000000    
   0.00000000    
   0.00000000    
   0.00000000    
   0.00000000    
   0.00000000    
   0.00000000    
   0.00000000    
   0.00000000    
   0.00000000    
   0.00000000    
   0.00000000    
   0.00000000    
   0.00000000    
   0.00000000    
   0.00000000    
   0.00000000    
   0.00000000    
   0.00000000    
   0.00000000    
   0.00000000    
   0.00000000    
   0.00000000    
   0.00000000    
   0.00000000    
   0.00000000    
   0.00000000    
   0.00000000    
   0.00000000    
   0.00000000    
   0.00000000    
   0.00000000    
   0.00000000    
   0.00000000    
   0.00000000    
   0.00000000    
   0.00000000    
   0.00000000    
   0.00000000    
   0.00000000    
   0.00000000    
   0.00000000    
   0.00000000    
   0.00000000    
   0.00000000    
   0.00000000    
   0.00000000    
   0.00000000    
   0.00000000    
   0.00000000    
   0.00000000    
   0.00000000    
   0.00000000    
   0.00000000    
   0.00000000    
   0.00000000    
   0.00000000    
   0.00000000    
   0.00000000    
   0.00000000    
   0.00000000    
   0.00000000    
   0.00000000    
   0.00000000    
   0.00000000    
   0.00000000    
   0.00000000    
   0.00000000    
   0.00000000    
   0.00000000    
   0.00000000    
   0.00000000    
   0.00000000    
   0.00000000    
   0.00000000    
   0.00000000    
   0.00000000    
   0.00000000    
   0.00000000    
   0.00000000    
   0.00000000    
   0.00000000    
   0.00000000    
   0.00000000    
   0.00000000    
   0.00000000    
   0.00000000    
   0.00000000    
   0.00000000    
   0.00000000    
   0.00000000    
   0.00000000    
   0.00000000    
   0.00000000    
   0.00000000    
   0.00000000    
   0.00000000    
   0.00000000    
   0.00000000    
   0.00000000    
   0.00000000    
   0.00000000    
   0.00000000    
   0.00000000    
   0.00000000    
   0.00000000    
   0.00000000    
   0.00000000    
   0.00000000    
   0.00000000    
   0.00000000    
   0.00000000    
   0.00000000    
   0.00000000    
   0.00000000    
   0.00000000    
   0.00000000    
   0.00000000    
   0.00000000    
   0.00000000    
   0.00000000    
   0.00000000    
   0.00000000    
   0.00000000    
   0.00000000    
   0.00000000    
   0.00000000    
   0.00000000    
   0.00000000    
   0.00000000    
   0.00000000    
   0.00000000    
   0.00000000    
   0.00000000    
   0.00000000    
   0.00000000    
   0.00000000    
   0.00000000    
   0.00000000    
   0.00000000    
   0.00000000    
   0.00000000    
   0.00000000    
   0.00000000    
   0.00000000    
   0.00000000    
   0.00000000    
   0.00000000    
   0.00000000    
   0.00000000    
   0.00000000    
   0.00000000    
   0.00000000    
   0.00000000    
   0.00000000    
   0.00000000    
   0.00000000    
   0.00000000    
   0.00000000    
   0.00000000    
   0.00000000    
   0.00000000    
   0.00000000    
   0.00000000    
   0.00000000    
   0.00000000    
   0.00000000    
   0.00000000    
   0.00000000    
   0.00000000    
   0.00000000    
   0.00000000    
   0.00000000    
   0.00000000    
   0.00000000    
   0.00000000    
   0.00000000    
   0.00000000    
   0.00000000    
   0.00000000    
   0.00000000    
   0.00000000    
   0.00000000    
   0.00000000    
   0.00000000    
   0.00000000    
   0.00000000    
   0.00000000    
   0.00000000    
   0.00000000    
   0.00000000    
   0.00000000    
   0.00000000    
   0.00000000    
   0.00000000    
   0.00000000    
   0.00000000    
   0.00000000    
   0.00000000    
   0.00000000    
   0.00000000    
   0.00000000    
   0.00000000    
   0.00000000    
   0.00000000    
   0.00000000    
   0.00000000    
   0.00000000    
   0.00000000    
   0.00000000    
   0.00000000    
   0.00000000    
   0.00000000    
   0.00000000    
   0.00000000    
   0.00000000    
   0.00000000    
   0.00000000    
   0.00000000    
   0.00000000    
   0.00000000    
   0.00000000    
   0.00000000    
   0.00000000    
   0.00000000    
   0.00000000    
   0.00000000    
   0.00000000    
   0.00000000    
   0.00000000    
   0.00000000    
   0.00000000    
   0.00000000    
   0.00000000    
   0.00000000    
   0.00000000    
   0.00000000    
   0.00000000    
   0.00000000    
   0.00000000    
   0.00000000    
   0.00000000    
   0.00000000    
   0.00000000    
   0.00000000    
   0.00000000    
   0.00000000    
   0.00000000    
   0.00000000    
   0.00000000    
   0.00000000    
   0.00000000    
   0.00000000    
   0.00000000    
   0.00000000    
   0.00000000    
   0.00000000    
   0.00000000    
   0.00000000    
   0.00000000    
   0.00000000    
   0.00000000    
   0.00000000    
   0.00000000    
   0.00000000    
   0.00000000    
   0.00000000    
   0.00000000    
   0.00000000    
   0.00000000    
   0.00000000    
   0.00000000    
   0.00000000    
   0.00000000    
   0.00000000    
   0.00000000    
   0.00000000    
   0.00000000    
   0.00000000    
   0.00000000    
   0.00000000    
   0.00000000    
   0.00000000    
   0.00000000    
   0.00000000    
   0.00000000    
   0.00000000    
   0.00000000    
   0.00000000    
   0.00000000    
   0.00000000    
   0.00000000    
   0.00000000    
   0.00000000    
   0.00000000    
   0.00000000    
   0.00000000    
   0.00000000    
   0.00000000    
   0.00000000    
   0.00000000    
   0.00000000    
   0.00000000    
   0.00000000    
   0.00000000    
   0.00000000    
   0.00000000    
   0.00000000    
   0.00000000    
   0.00000000    
   0.00000000    
   0.00000000    
   0.00000000    
   0.00000000    
   0.00000000    
   0.00000000    
   0.00000000    
   0.00000000    
   0.00000000    
   0.00000000    
   0.00000000    
   0.00000000    
   0.00000000    
   0.00000000    
   0.00000000    
   0.00000000    
   0.00000000    
   0.00000000    
   0.00000000    
   0.00000000    
   0.00000000    
   0.00000000    
   0.00000000    
   0.00000000    
   0.00000000    
   0.00000000    
   0.00000000    
   0.00000000    
   0.00000000    
   0.00000000    
   0.00000000    
   0.00000000    
   0.00000000    
   0.00000000    
   0.00000000    
   0.00000000    
   0.00000000    
   0.00000000    
   0.00000000    
   0.00000000    
   0.00000000    
   0.00000000    
   0.00000000    
   0.00000000    
   0.00000000    
   0.00000000    
   0.00000000    
   0.00000000    
   0.00000000    
   0.00000000    
   0.00000000    
   0.00000000    
   0.00000000    
   0.00000000    
   0.00000000    
   0.00000000    
   0.00000000    
   0.00000000    
   0.00000000    
   0.00000000    
   0.00000000    
   0.00000000    
   0.00000000    
   0.00000000    
   0.00000000    
   0.00000000    
   0.00000000    
   0.00000000    
   0.00000000    
   0.00000000    
   0.00000000    
   0.00000000    
   0.00000000    
   0.00000000    
   0.00000000    
   0.00000000    
   0.00000000    
   0.00000000    
   0.00000000    
   0.00000000    
   0.00000000    
   0.00000000    
   0.00000000    
   0.00000000    
   0.00000000    
   0.00000000    
   0.00000000    
   0.00000000    
   0.00000000    
   0.00000000    
   0.00000000    
   0.00000000    
   0.00000000    
   0.00000000    
   0.00000000    
   0.00000000    
   0.00000000    
   0.00000000    
   0.00000000    
   0.00000000    
   0.00000000    
   0.00000000    
   0.00000000    
   0.00000000    
   0.00000000    
   0.00000000    
   0.00000000    
   0.00000000    
   0.00000000    
   0.00000000    
   0.00000000    
   0.00000000    
   0.00000000    
   0.00000000    
   0.00000000    
   0.00000000    
   0.00000000    
   0.00000000    
   0.00000000    
   0.00000000    
   0.00000000    
   0.00000000    
   0.00000000    
   0.00000000    
   0.00000000    
   0.00000000    
   0.00000000    
   0.00000000    
   0.00000000    
   0.00000000    
   0.00000000    
   0.00000000    
   0.00000000    
   0.00000000    
   0.00000000    
   0.00000000    
   0.00000000    
   0.00000000    
   0.00000000    
   0.00000000    
   0.00000000    
   0.00000000    
   0.00000000    
   0.00000000    
   0.00000000    
   0.00000000    
   0.00000000    
   0.00000000    
   0.00000000    
   0.00000000    
   0.00000000    
   0.00000000    
   0.00000000    
   0.00000000    
   0.00000000    
   0.00000000    
   0.00000000    
   0.00000000    
   0.00000000    
   0.00000000    
   0.00000000    
   0.00000000    
   0.00000000    
   0.00000000    
   0.00000000    
   0.00000000    
   0.00000000    
   0.00000000    
   0.00000000    
   0.00000000    
   0.00000000    
   0.00000000    
   0.00000000    
   0.00000000    
   0.00000000    
   0.00000000    
   0.00000000    
   0.00000000    
   0.00000000    
   0.00000000    
   0.00000000    
   0.00000000    
   0.00000000    
   0.00000000    
   0.00000000    
   0.00000000    
   0.00000000    
   0.00000000    
   0.00000000    
   0.00000000    
   0.00000000    
   0.00000000    
   0.00000000    
   0.00000000    
   0.00000000    
   0.00000000    
   0.00000000    
   0.00000000    
   0.00000000    
   0.00000000    
   0.00000000    
   0.00000000    
   0.00000000    
   0.00000000    
   0.00000000    
   0.00000000    
   0.00000000    
   0.00000000    
   0.00000000    
   0.00000000    
   0.00000000    
   0.00000000    
   0.00000000    
   0.00000000    
   0.00000000    
   0.00000000    
   0.00000000    
   0.00000000    
   0.00000000    
   0.00000000    
   0.00000000    
   0.00000000    
   0.00000000    
   0.00000000    
   0.00000000    
   0.00000000    
   0.00000000    
   0.00000000    
   0.00000000    
   0.00000000    
   0.00000000    
   0.00000000    
   0.00000000    
   0.00000000    
   0.00000000    
   0.00000000    
   0.00000000    
   0.00000000    
   0.00000000    
   0.00000000    
   0.00000000    
   0.00000000    
   0.00000000    
   0.00000000    
   0.00000000    
   0.00000000    
   0.00000000    
   0.00000000    
   0.00000000    
   0.00000000    
   0.00000000    
   0.00000000    
   0.00000000    
   0.00000000    
   0.00000000    
   0.00000000    
   0.00000000    
   0.00000000    
   0.00000000    
   0.00000000    
   0.00000000    
   0.00000000    
   0.00000000    
   0.00000000    
   0.00000000    
   0.00000000    
   0.00000000    
   0.00000000    
   0.00000000    
   0.00000000    
   0.00000000    
   0.00000000    
   0.00000000    
   0.00000000    
   0.00000000    
   0.00000000    
   0.00000000    
   0.00000000    
   0.00000000    
   0.00000000    
   0.00000000    
   0.00000000    
   0.00000000    
   0.00000000    
   0.00000000    
   0.00000000    
   0.00000000    
   0.00000000    
   0.00000000    
   0.00000000    
   0.00000000    
   0.00000000    
   0.00000000    
   0.00000000    
   0.00000000    
   0.00000000    
   0.00000000    
   0.00000000    
   0.00000000    
   0.00000000    
   0.00000000    
   0.00000000    
   0.00000000    
   0.00000000    
   0.00000000    
   0.00000000    
   0.00000000    
   0.00000000    
   0.00000000    
   0.00000000    
   0.00000000    
   0.00000000    
   0.00000000    
   0.00000000    
   0.00000000    
   0.00000000    
   0.00000000    
   0.00000000    
   0.00000000    
   0.00000000    
   0.00000000    
   0.00000000    
   0.00000000    
   0.00000000    
   0.00000000    
   0.00000000    
   0.00000000    
   0.00000000    
   0.00000000    
   0.00000000    
   0.00000000    
   0.00000000    
   0.00000000    
   0.00000000    
   0.00000000    
   0.00000000    
   0.00000000    
   0.00000000    
   0.00000000    
   0.00000000    
   0.00000000    
   0.00000000    
   0.00000000    
   0.00000000    
   0.00000000    
   0.00000000    
   0.00000000    
   0.00000000    
   0.00000000    
   0.00000000    
   0.00000000    
   0.00000000    
   0.00000000    
   0.00000000    
   0.00000000    
   0.00000000    
   0.00000000    
   0.00000000    
   0.00000000    
   0.00000000    
   0.00000000    
   0.00000000    
   0.00000000    
   0.00000000    
   0.00000000    
   0.00000000    
   0.00000000    
   0.00000000    
   0.00000000    
   0.00000000    
   0.00000000    
   0.00000000    
   0.00000000    
   0.00000000    
   0.00000000    
   0.00000000    
   0.00000000    
   0.00000000    
   0.00000000    
   0.00000000    
   0.00000000    
   0.00000000    
   0.00000000    
   0.00000000    
   0.00000000    
   0.00000000    
   0.00000000    
   0.00000000    
   0.00000000    
   0.00000000    
   0.00000000    
   0.00000000    
   0.00000000    
   0.00000000    
   0.00000000    
   0.00000000    
   0.00000000    
   0.00000000    
   0.00000000    
   0.00000000    
   0.00000000    
   0.00000000    
   0.00000000    
   0.00000000    
   0.00000000    
   0.00000000    
   0.00000000    
   0.00000000    
   0.00000000    
   0.00000000    
   0.00000000    
   0.00000000    
   0.00000000    
   0.00000000    
   0.00000000    
   0.00000000    
   0.00000000    
   0.00000000    
   0.00000000    
   0.00000000    
   0.00000000    
   0.00000000    
   0.00000000    
   0.00000000    
   0.00000000    
   0.00000000    
   0.00000000    
   0.00000000    
   0.00000000    
   0.00000000    
   0.00000000    
   0.00000000    
   0.00000000    
   0.00000000    
   0.00000000    
   0.00000000    
   0.00000000    
   0.00000000    
   0.00000000    
   0.00000000    
   0.00000000    
   0.00000000    
   0.00000000    
   0.00000000    
   0.00000000    
   0.00000000    
   0.00000000    
   0.00000000    
   0.00000000    
   0.00000000    
   0.00000000    
   0.00000000    
   0.00000000    
   0.00000000    
   0.00000000    
   0.00000000    
   0.00000000    
   0.00000000    
   0.00000000    
   0.00000000    
   0.00000000    
   0.00000000    
   0.00000000    
   0.00000000    
   0.00000000    
   0.00000000    
   0.00000000    
   0.00000000    
   0.00000000    
   0.00000000    
   0.00000000    
   0.00000000    
   0.00000000    
   0.00000000    
   0.00000000    
   0.00000000    
   0.00000000    
   0.00000000    
   0.00000000    
   0.00000000    
   0.00000000    
   0.00000000    
   0.00000000    
   0.00000000    
   0.00000000    
   0.00000000    
   0.00000000    
   0.00000000    
   0.00000000    
   0.00000000    
   0.00000000    
   0.00000000    
   0.00000000    
   0.00000000    
   0.00000000    
   0.00000000    
   0.00000000    
   0.00000000    
   0.00000000    
   0.00000000    
   0.00000000    
   0.00000000    
   0.00000000    
   0.00000000    
   0.00000000    
   0.00000000    
   0.00000000    
   0.00000000    
   0.00000000    
   0.00000000    
   0.00000000    
   0.00000000    
   0.00000000    
   0.00000000    
   0.00000000    
   0.00000000    
   0.00000000    
   0.00000000    
   0.00000000    
   0.00000000    
   0.00000000    
   0.00000000    
   0.00000000    
   0.00000000    
   0.00000000    
   0.00000000    
   0.00000000    
   0.00000000    
   0.00000000    
   0.00000000    
   0.00000000    
   0.00000000    
   0.00000000    
   0.00000000    
   0.00000000    
   0.00000000    
   0.00000000    
   0.00000000    
   0.00000000    
   0.00000000    
   0.00000000    
   0.00000000    
   0.00000000    
   0.00000000    
   0.00000000    
   0.00000000    
   0.00000000    
   0.00000000    
   0.00000000    
   0.00000000    
   0.00000000    
   0.00000000    
   0.00000000    
   0.00000000    
   0.00000000    
   0.00000000    
   0.00000000    
   0.00000000    
   0.00000000    
   0.00000000    
   0.00000000    
   0.00000000    
   0.00000000    
   0.00000000    
   0.00000000    
   0.00000000    
   0.00000000    
   0.00000000    
   0.00000000    
   0.00000000    
   0.00000000    
   0.00000000    
   0.00000000    
   0.00000000    
   0.00000000    
   0.00000000    
   0.00000000    
   0.00000000    
   0.00000000    
   0.00000000    
   0.00000000    
   0.00000000    
   0.00000000    
   0.00000000    
   0.00000000    
   0.00000000    
   0.00000000    
   0.00000000    
   0.00000000    
   0.00000000    
   0.00000000    
   0.00000000    
   0.00000000    
   0.00000000    
   0.00000000    
   0.00000000    
   0.00000000    
   0.00000000    
   0.00000000    
   0.00000000    
   0.00000000    
   0.00000000    
   0.00000000    
   0.00000000    
   0.00000000    
   0.00000000    
   0.00000000    
   0.00000000    
   0.00000000    
   0.00000000    
   0.00000000    
   0.00000000    
   0.00000000    
   0.00000000    
   0.00000000    
   0.00000000    
   0.00000000    
   0.00000000    
   0.00000000    
   0.00000000    
   0.00000000    
   0.00000000    
   0.00000000    
   0.00000000    
   0.00000000    
   0.00000000    
   0.00000000    
   0.00000000    
   0.00000000    
   0.00000000    
   0.00000000    
   0.00000000    
   0.00000000    
   0.00000000    
   0.00000000    
   0.00000000    
   0.00000000    
   0.00000000    
   0.00000000    
   0.00000000    
   0.00000000    
   0.00000000    
   0.00000000    
   0.00000000    
   0.00000000    
   0.00000000    
   0.00000000    
   0.00000000    
   0.00000000    
   0.00000000    
   0.00000000    
   0.00000000    
   0.00000000    
   0.00000000    
   0.00000000    
   0.00000000    
   0.00000000    
   0.00000000    
   0.00000000    
   0.00000000    
   0.00000000    
   0.00000000    
   0.00000000    
   0.00000000    
   0.00000000    
   0.00000000    
   0.00000000    
   0.00000000    
   0.00000000    
   0.00000000    
   0.00000000    
   0.00000000    
   0.00000000    
   0.00000000    
   0.00000000    
   0.00000000    
   0.00000000    
   0.00000000    
   0.00000000    
   0.00000000    
   0.00000000    
   0.00000000    
   0.00000000    
   0.00000000    
   0.00000000    
   0.00000000    
   0.00000000    
   0.00000000    
   0.00000000    
   0.00000000    
   0.00000000    
   0.00000000    
   0.00000000    
   0.00000000    
   0.00000000    
   0.00000000    
   0.00000000    
   0.00000000    
   0.00000000    
   0.00000000    
   0.00000000    
   0.00000000    
   0.00000000    
   0.00000000    
   0.00000000    
   0.00000000    
   0.00000000    
   0.00000000    
   0.00000000    
   0.00000000    
   0.00000000    
   0.00000000    
   0.00000000    
   0.00000000    
   0.00000000    
   0.00000000    
   0.00000000    
   0.00000000    
   0.00000000    
   0.00000000    
   0.00000000    
   0.00000000    
   0.00000000    
   0.00000000    
   0.00000000    
   0.00000000    
   0.00000000    
   0.00000000    
   0.00000000    
   0.00000000    
   0.00000000    
   0.00000000    
   0.00000000    
   0.00000000    
   0.00000000    
   0.00000000    
   0.00000000    
   0.00000000    
   0.00000000    
   0.00000000    
   0.00000000    
   0.00000000    
   0.00000000    
   0.00000000    
   0.00000000    
   1.00000000    
   0.00000000    
   0.00000000    
   0.00000000    
   0.00000000    
   0.00000000    
   0.00000000    
   0.00000000    
   0.00000000    
   0.00000000    
   0.00000000    
   0.00000000    
   0.00000000    
   0.00000000    
   0.00000000    
   0.00000000    
   0.00000000    
   0.00000000    
   0.00000000    
   0.00000000    
   0.00000000    
   0.00000000    
   0.00000000    
   0.00000000    
   0.00000000    
   0.00000000    
   0.00000000    
   0.00000000    
   0.00000000    
   0.00000000    
   0.00000000    
   0.00000000    
   0.00000000    
   0.00000000    
   0.00000000    
   0.00000000    
   0.00000000    
   0.00000000    
   0.00000000    
   0.00000000    
   0.00000000    
   0.00000000    
   0.00000000    
   0.00000000    
   0.00000000    
   0.00000000    
   0.00000000    
   0.00000000    
   0.00000000    
   0.00000000    
   0.00000000    
   0.00000000    
   0.00000000    
   2.00000000    
   1.00000000    
   1.00000000    
   0.00000000    
   0.00000000    
   1.00000000    
   0.00000000    
   1.00000000    
   0.00000000    
   0.00000000    
   1.00000000    
   0.00000000    
   0.00000000    
   0.00000000    
   0.00000000    
   0.00000000    
   0.00000000    
   0.00000000    
   0.00000000    
   0.00000000    
   0.00000000    
   0.00000000    
   0.00000000    
   0.00000000    
   0.00000000    
   0.00000000    
   0.00000000    
   0.00000000    
   0.00000000    
   0.00000000    
   0.00000000    
   0.00000000    
   0.00000000    
   0.00000000    
   0.00000000    
   0.00000000    
   0.00000000    
   0.00000000    
   0.00000000    
   0.00000000    
   0.00000000    
   0.00000000    
   0.00000000    
   0.00000000    
   0.00000000    
   0.00000000    
   0.00000000    
   0.00000000    
   0.00000000    
   0.00000000    
   0.00000000    
   0.00000000    
   0.00000000    
   0.00000000    
   0.00000000    
   0.00000000    
   0.00000000    
   0.00000000    
   0.00000000    
   0.00000000    
   0.00000000    
   0.00000000    
   0.00000000    
   0.00000000    
   0.00000000    
   0.00000000    
   1.00000000    
   0.00000000    
   0.00000000    
   0.00000000    
   1.00000000    
   0.00000000    
   1.00000000    
   0.00000000    
   0.00000000    
   0.00000000    
   0.00000000    
   0.00000000    
   0.00000000    
   0.00000000    
   0.00000000    
   0.00000000    
   0.00000000    
   0.00000000    
   0.00000000    
   0.00000000    
   0.00000000    
   0.00000000    
   0.00000000    
   0.00000000    
   0.00000000    
   0.00000000    
   0.00000000    
   0.00000000    
   0.00000000    
   0.00000000    
   0.00000000    
   0.00000000    
   0.00000000    
   0.00000000    
   0.00000000    
   0.00000000    
   0.00000000    
   0.00000000    
   0.00000000    
   0.00000000    
   0.00000000    
   0.00000000    
   0.00000000    
   0.00000000    
   0.00000000    
   0.00000000    
   0.00000000    
   0.00000000    
   0.00000000    
   0.00000000    
   0.00000000    
   0.00000000    
   0.00000000    
   0.00000000    
   0.00000000    
   0.00000000    
   0.00000000    
   0.00000000    
   0.00000000    
   0.00000000    
   1.00000000    
   0.00000000    
   0.00000000    
   0.00000000    
   0.00000000    
   0.00000000    
   0.00000000    
   3.00000000    
   0.00000000    
   1.00000000    
   1.00000000    
   1.00000000    
   1.00000000    
   0.00000000    
   1.00000000    
   0.00000000    
   0.00000000    
   0.00000000    
   0.00000000    
   0.00000000    
   0.00000000    
   0.00000000    
   0.00000000    
   0.00000000    
   0.00000000    
   0.00000000    
   0.00000000    
   0.00000000    
   0.00000000    
   0.00000000    
   0.00000000    
   0.00000000    
   0.00000000    
   0.00000000    
   0.00000000    
   0.00000000    
   0.00000000    
   0.00000000    
   0.00000000    
   0.00000000    
   0.00000000    
   0.00000000    
   0.00000000    
   0.00000000    
   0.00000000    
   0.00000000    
   0.00000000    
   0.00000000    
   0.00000000    
   0.00000000    
   0.00000000    
   0.00000000    
   0.00000000    
   0.00000000    
   0.00000000    
   0.00000000    
   0.00000000    
   0.00000000    
   0.00000000    
   0.00000000    
   0.00000000    
   0.00000000    
   0.00000000    
   1.00000000    
   1.00000000    
   1.00000000    
   1.00000000    
   0.00000000    
   0.00000000    
   2.00000000    
   0.00000000    
   0.00000000    
   0.00000000    
   0.00000000    
   0.00000000    
   1.00000000    
   0.00000000    
   0.00000000    
   0.00000000    
   1.00000000    
   0.00000000    
   0.00000000    
   0.00000000    
   0.00000000    
   0.00000000    
   0.00000000    
   0.00000000    
   0.00000000    
   0.00000000    
   0.00000000    
   0.00000000    
   0.00000000    
   0.00000000    
   0.00000000    
   0.00000000    
   0.00000000    
   0.00000000    
   0.00000000    
   0.00000000    
   0.00000000    
   0.00000000    
   0.00000000    
   0.00000000    
   0.00000000    
   0.00000000    
   0.00000000    
   0.00000000    
   0.00000000    
   0.00000000    
   0.00000000    
   0.00000000    
   0.00000000    
   0.00000000    
   0.00000000    
   0.00000000    
   0.00000000    
   0.00000000    
   0.00000000    
   0.00000000    
   0.00000000    
   0.00000000    
   0.00000000    
   0.00000000    
   0.00000000    
   0.00000000    
   0.00000000    
   0.00000000    
   1.00000000    
   0.00000000    
   0.00000000    
   0.00000000    
   0.00000000    
   1.00000000    
   1.00000000    
   2.00000000    
   1.00000000    
   4.00000000    
   0.00000000    
   1.00000000    
   1.00000000    
   0.00000000    
   0.00000000    
   1.00000000    
   0.00000000    
   0.00000000    
   0.00000000    
   0.00000000    
   0.00000000    
   0.00000000    
   0.00000000    
   0.00000000    
   0.00000000    
   0.00000000    
   0.00000000    
   0.00000000    
   0.00000000    
   0.00000000    
   0.00000000    
   0.00000000    
   0.00000000    
   0.00000000    
   0.00000000    
   0.00000000    
   0.00000000    
   0.00000000    
   0.00000000    
   0.00000000    
   0.00000000    
   0.00000000    
   0.00000000    
   0.00000000    
   0.00000000    
   0.00000000    
   0.00000000    
   0.00000000    
   0.00000000    
   0.00000000    
   0.00000000    
   0.00000000    
   0.00000000    
   0.00000000    
   0.00000000    
   0.00000000    
   0.00000000    
   0.00000000    
   0.00000000    
   0.00000000    
   0.00000000    
   0.00000000    
   0.00000000    
   0.00000000    
   2.00000000    
   1.00000000    
   0.00000000    
   0.00000000    
   1.00000000    
   0.00000000    
   0.00000000    
   0.00000000    
   1.00000000    
   1.00000000    
   0.00000000    
   0.00000000    
   0.00000000    
   1.00000000    
   2.00000000    
   1.00000000    
   0.00000000    
   0.00000000    
   0.00000000    
   0.00000000    
   0.00000000    
   0.00000000    
   0.00000000    
   0.00000000    
   0.00000000    
   0.00000000    
   0.00000000    
   0.00000000    
   0.00000000    
   0.00000000    
   0.00000000    
   0.00000000    
   0.00000000    
   0.00000000    
   0.00000000    
   0.00000000    
   0.00000000    
   0.00000000    
   0.00000000    
   0.00000000    
   0.00000000    
   0.00000000    
   0.00000000    
   0.00000000    
   0.00000000    
   0.00000000    
   0.00000000    
   0.00000000    
   0.00000000    
   0.00000000    
   0.00000000    
   0.00000000    
   0.00000000    
   0.00000000    
   0.00000000    
   0.00000000    
   0.00000000    
   0.00000000    
   0.00000000    
   0.00000000    
   0.00000000    
   0.00000000    
   1.00000000    
   1.00000000    
   1.00000000    
   0.00000000    
   0.00000000    
   1.00000000    
   0.00000000    
   0.00000000    
   1.00000000    
   0.00000000    
   0.00000000    
   2.00000000    
   2.00000000    
   0.00000000    
   0.00000000    
   0.00000000    
   1.00000000    
   0.00000000    
   0.00000000    
   2.00000000    
   1.00000000    
   0.00000000    
   0.00000000    
   0.00000000    
   0.00000000    
   0.00000000    
   0.00000000    
   0.00000000    
   0.00000000    
   0.00000000    
   0.00000000    
   0.00000000    
   0.00000000    
   0.00000000    
   0.00000000    
   0.00000000    
   0.00000000    
   0.00000000    
   0.00000000    
   0.00000000    
   0.00000000    
   0.00000000    
   0.00000000    
   0.00000000    
   0.00000000    
   0.00000000    
   0.00000000    
   0.00000000    
   0.00000000    
   0.00000000    
   0.00000000    
   0.00000000    
   0.00000000    
   0.00000000    
   0.00000000    
   0.00000000    
   0.00000000    
   0.00000000    
   0.00000000    
   0.00000000    
   0.00000000    
   0.00000000    
   0.00000000    
   0.00000000    
   0.00000000    
   0.00000000    
   0.00000000    
   0.00000000    
   0.00000000    
   0.00000000    
   2.00000000    
   0.00000000    
   4.00000000    
   1.00000000    
   1.00000000    
   1.00000000    
   0.00000000    
   1.00000000    
   1.00000000    
   2.00000000    
   1.00000000    
   3.00000000    
   0.00000000    
   2.00000000    
   0.00000000    
   0.00000000    
   0.00000000    
   0.00000000    
   0.00000000    
   0.00000000    
   0.00000000    
   0.00000000    
   0.00000000    
   0.00000000    
   0.00000000    
   0.00000000    
   0.00000000    
   0.00000000    
   0.00000000    
   0.00000000    
   0.00000000    
   0.00000000    
   0.00000000    
   0.00000000    
   0.00000000    
   0.00000000    
   0.00000000    
   0.00000000    
   0.00000000    
   0.00000000    
   0.00000000    
   0.00000000    
   0.00000000    
   0.00000000    
   0.00000000    
   0.00000000    
   0.00000000    
   0.00000000    
   0.00000000    
   0.00000000    
   0.00000000    
   0.00000000    
   0.00000000    
   0.00000000    
   0.00000000    
   0.00000000    
   0.00000000    
   0.00000000    
   0.00000000    
   0.00000000    
   0.00000000    
   0.00000000    
   2.00000000    
   0.00000000    
   0.00000000    
   2.00000000    
   0.00000000    
   2.00000000    
   2.00000000    
   0.00000000    
   0.00000000    
   0.00000000    
   1.00000000    
   0.00000000    
   0.00000000    
   0.00000000    
   1.00000000    
   0.00000000    
   1.00000000    
   1.00000000    
   0.00000000    
   0.00000000    
   0.00000000    
   0.00000000    
   0.00000000    
   0.00000000    
   0.00000000    
   0.00000000    
   0.00000000    
   0.00000000    
   0.00000000    
   0.00000000    
   0.00000000    
   0.00000000    
   0.00000000    
   0.00000000    
   0.00000000    
   0.00000000    
   0.00000000    
   0.00000000    
   0.00000000    
   0.00000000    
   0.00000000    
   0.00000000    
   0.00000000    
   0.00000000    
   0.00000000    
   0.00000000    
   0.00000000    
   0.00000000    
   0.00000000    
   0.00000000    
   0.00000000    
   0.00000000    
   0.00000000    
   0.00000000    
   0.00000000    
   0.00000000    
   0.00000000    
   0.00000000    
   0.00000000    
   0.00000000    
   1.00000000    
   0.00000000    
   0.00000000    
   0.00000000    
   2.00000000    
   0.00000000    
   0.00000000    
   1.00000000    
   0.00000000    
   0.00000000    
   1.00000000    
   0.00000000    
   0.00000000    
   0.00000000    
   1.00000000    
   0.00000000    
   0.00000000    
   1.00000000    
   1.00000000    
   0.00000000    
   1.00000000    
   0.00000000    
   0.00000000    
   0.00000000    
   0.00000000    
   0.00000000    
   0.00000000    
   0.00000000    
   0.00000000    
   0.00000000    
   0.00000000    
   0.00000000    
   0.00000000    
   0.00000000    
   0.00000000    
   0.00000000    
   0.00000000    
   0.00000000    
   0.00000000    
   0.00000000    
   0.00000000    
   0.00000000    
   0.00000000    
   0.00000000    
   0.00000000    
   0.00000000    
   0.00000000    
   0.00000000    
   0.00000000    
   0.00000000    
   0.00000000    
   0.00000000    
   0.00000000    
   0.00000000    
   0.00000000    
   0.00000000    
   0.00000000    
   0.00000000    
   0.00000000    
   0.00000000    
   0.00000000    
   0.00000000    
   0.00000000    
   0.00000000    
   0.00000000    
   0.00000000    
   0.00000000    
   0.00000000    
   1.00000000    
   2.00000000    
   0.00000000    
   0.00000000    
   0.00000000    
   2.00000000    
   3.00000000    
   0.00000000    
   1.00000000    
   2.00000000    
   1.00000000    
   0.00000000    
   0.00000000    
   0.00000000    
   1.00000000    
   1.00000000    
   1.00000000    
   1.00000000    
   0.00000000    
   0.00000000    
   0.00000000    
   0.00000000    
   0.00000000    
   0.00000000    
   0.00000000    
   0.00000000    
   0.00000000    
   0.00000000    
   0.00000000    
   0.00000000    
   0.00000000    
   0.00000000    
   0.00000000    
   0.00000000    
   0.00000000    
   0.00000000    
   0.00000000    
   0.00000000    
   0.00000000    
   0.00000000    
   0.00000000    
   0.00000000    
   0.00000000    
   0.00000000    
   0.00000000    
   0.00000000    
   0.00000000    
   0.00000000    
   0.00000000    
   0.00000000    
   0.00000000    
   0.00000000    
   0.00000000    
   0.00000000    
   0.00000000    
   0.00000000    
   0.00000000    
   0.00000000    
   0.00000000    
   0.00000000    
   0.00000000    
   0.00000000    
   1.00000000    
   0.00000000    
   0.00000000    
   2.00000000    
   2.00000000    
   1.00000000    
   1.00000000    
   1.00000000    
   1.00000000    
   0.00000000    
   0.00000000    
   1.00000000    
   1.00000000    
   1.00000000    
   0.00000000    
   2.00000000    
   1.00000000    
   0.00000000    
   0.00000000    
   0.00000000    
   0.00000000    
   0.00000000    
   0.00000000    
   0.00000000    
   0.00000000    
   0.00000000    
   0.00000000    
   0.00000000    
   0.00000000    
   0.00000000    
   0.00000000    
   0.00000000    
   0.00000000    
   0.00000000    
   0.00000000    
   0.00000000    
   0.00000000    
   0.00000000    
   0.00000000    
   0.00000000    
   0.00000000    
   0.00000000    
   0.00000000    
   0.00000000    
   0.00000000    
   0.00000000    
   0.00000000    
   0.00000000    
   0.00000000    
   0.00000000    
   0.00000000    
   0.00000000    
   0.00000000    
   0.00000000    
   0.00000000    
   0.00000000    
   0.00000000    
   0.00000000    
   0.00000000    
   0.00000000    
   0.00000000    
   0.00000000    
   0.00000000    
   0.00000000    
   0.00000000    
   2.00000000    
   0.00000000    
   0.00000000    
   1.00000000    
   1.00000000    
   1.00000000    
   1.00000000    
   1.00000000    
   0.00000000    
   1.00000000    
   0.00000000    
   0.00000000    
   0.00000000    
   0.00000000    
   0.00000000    
   3.00000000    
   1.00000000    
   0.00000000    
   0.00000000    
   0.00000000    
   0.00000000    
   0.00000000    
   0.00000000    
   0.00000000    
   0.00000000    
   0.00000000    
   0.00000000    
   0.00000000    
   0.00000000    
   0.00000000    
   0.00000000    
   0.00000000    
   0.00000000    
   0.00000000    
   0.00000000    
   0.00000000    
   0.00000000    
   0.00000000    
   0.00000000    
   0.00000000    
   0.00000000    
   0.00000000    
   0.00000000    
   0.00000000    
   0.00000000    
   0.00000000    
   0.00000000    
   0.00000000    
   0.00000000    
   0.00000000    
   0.00000000    
   0.00000000    
   0.00000000    
   0.00000000    
   0.00000000    
   0.00000000    
   0.00000000    
   0.00000000    
   0.00000000    
   0.00000000    
   0.00000000    
   0.00000000    
   0.00000000    
   1.00000000    
   0.00000000    
   2.00000000    
   0.00000000    
   4.00000000    
   1.00000000    
   0.00000000    
   0.00000000    
   3.00000000    
   0.00000000    
   1.00000000    
   0.00000000    
   1.00000000    
   3.00000000    
   1.00000000    
   1.00000000    
   0.00000000    
   2.00000000    
   1.00000000    
   0.00000000    
   0.00000000    
   0.00000000    
   0.00000000    
   0.00000000    
   0.00000000    
   0.00000000    
   0.00000000    
   0.00000000    
   0.00000000    
   0.00000000    
   0.00000000    
   0.00000000    
   0.00000000    
   0.00000000    
   0.00000000    
   0.00000000    
   0.00000000    
   0.00000000    
   0.00000000    
   0.00000000    
   0.00000000    
   0.00000000    
   0.00000000    
   0.00000000    
   0.00000000    
   0.00000000    
   0.00000000    
   0.00000000    
   0.00000000    
   0.00000000    
   0.00000000    
   0.00000000    
   0.00000000    
   0.00000000    
   0.00000000    
   0.00000000    
   0.00000000    
   0.00000000    
   0.00000000    
   0.00000000    
   0.00000000    
   0.00000000    
   0.00000000    
   0.00000000    
   0.00000000    
   1.00000000    
   0.00000000    
   2.00000000    
   1.00000000    
   1.00000000    
   1.00000000    
   1.00000000    
   2.00000000    
   0.00000000    
   1.00000000    
   1.00000000    
   1.00000000    
   1.00000000    
   1.00000000    
   0.00000000    
   2.00000000    
   0.00000000    
   0.00000000    
   0.00000000    
   0.00000000    
   0.00000000    
   0.00000000    
   0.00000000    
   0.00000000    
   0.00000000    
   0.00000000    
   0.00000000    
   0.00000000    
   0.00000000    
   0.00000000    
   0.00000000    
   0.00000000    
   0.00000000    
   0.00000000    
   0.00000000    
   0.00000000    
   0.00000000    
   0.00000000    
   0.00000000    
   0.00000000    
   0.00000000    
   0.00000000    
   0.00000000    
   0.00000000    
   0.00000000    
   0.00000000    
   0.00000000    
   0.00000000    
   0.00000000    
   0.00000000    
   0.00000000    
   0.00000000    
   0.00000000    
   0.00000000    
   0.00000000    
   0.00000000    
   0.00000000    
   0.00000000    
   0.00000000    
   0.00000000    
   0.00000000    
   0.00000000    
   1.00000000    
   0.00000000    
   0.00000000    
   0.00000000    
   0.00000000    
   0.00000000    
   0.00000000    
   1.00000000    
   0.00000000    
   0.00000000    
   3.00000000    
   0.00000000    
   1.00000000    
   2.00000000    
   0.00000000    
   0.00000000    
   0.00000000    
   1.00000000    
   0.00000000    
   1.00000000    
   0.00000000    
   0.00000000    
   0.00000000    
   0.00000000    
   0.00000000    
   0.00000000    
   0.00000000    
   0.00000000    
   0.00000000    
   0.00000000    
   0.00000000    
   0.00000000    
   0.00000000    
   0.00000000    
   0.00000000    
   0.00000000    
   0.00000000    
   0.00000000    
   0.00000000    
   0.00000000    
   0.00000000    
   0.00000000    
   0.00000000    
   0.00000000    
   0.00000000    
   0.00000000    
   0.00000000    
   0.00000000    
   0.00000000    
   0.00000000    
   0.00000000    
   0.00000000    
   0.00000000    
   0.00000000    
   0.00000000    
   0.00000000    
   0.00000000    
   0.00000000    
   0.00000000    
   0.00000000    
   0.00000000    
   0.00000000    
   0.00000000    
   0.00000000    
   0.00000000    
   1.00000000    
   0.00000000    
   1.00000000    
   0.00000000    
   1.00000000    
   2.00000000    
   1.00000000    
   1.00000000    
   0.00000000    
   1.00000000    
   0.00000000    
   0.00000000    
   1.00000000    
   1.00000000    
   0.00000000    
   1.00000000    
   1.00000000    
   0.00000000    
   0.00000000    
   0.00000000    
   0.00000000    
   0.00000000    
   0.00000000    
   0.00000000    
   0.00000000    
   0.00000000    
   0.00000000    
   0.00000000    
   0.00000000    
   0.00000000    
   0.00000000    
   0.00000000    
   0.00000000    
   0.00000000    
   0.00000000    
   0.00000000    
   0.00000000    
   0.00000000    
   0.00000000    
   0.00000000    
   0.00000000    
   0.00000000    
   0.00000000    
   0.00000000    
   0.00000000    
   0.00000000    
   0.00000000    
   0.00000000    
   0.00000000    
   0.00000000    
   0.00000000    
   0.00000000    
   0.00000000    
   0.00000000    
   0.00000000    
   0.00000000    
   0.00000000    
   0.00000000    
   0.00000000    
   0.00000000    
   0.00000000    
   0.00000000    
   0.00000000    
   0.00000000    
   0.00000000    
   1.00000000    
   1.00000000    
   2.00000000    
   3.00000000    
   2.00000000    
   1.00000000    
   3.00000000    
   1.00000000    
   3.00000000    
   2.00000000    
   1.00000000    
   0.00000000    
   1.00000000    
   1.00000000    
   2.00000000    
   0.00000000    
   0.00000000    
   0.00000000    
   0.00000000    
   0.00000000    
   0.00000000    
   0.00000000    
   0.00000000    
   0.00000000    
   0.00000000    
   0.00000000    
   0.00000000    
   0.00000000    
   0.00000000    
   0.00000000    
   0.00000000    
   0.00000000    
   0.00000000    
   0.00000000    
   0.00000000    
   0.00000000    
   0.00000000    
   0.00000000    
   0.00000000    
   0.00000000    
   0.00000000    
   0.00000000    
   0.00000000    
   0.00000000    
   0.00000000    
   0.00000000    
   0.00000000    
   0.00000000    
   0.00000000    
   0.00000000    
   0.00000000    
   0.00000000    
   0.00000000    
   0.00000000    
   0.00000000    
   0.00000000    
   0.00000000    
   0.00000000    
   0.00000000    
   0.00000000    
   0.00000000    
   0.00000000    
   0.00000000    
   1.00000000    
   0.00000000    
   1.00000000    
   5.00000000    
   0.00000000    
   4.00000000    
   1.00000000    
   1.00000000    
   2.00000000    
   0.00000000    
   0.00000000    
   1.00000000    
   0.00000000    
   0.00000000    
   0.00000000    
   0.00000000    
   0.00000000    
   0.00000000    
   0.00000000    
   0.00000000    
   0.00000000    
   0.00000000    
   0.00000000    
   0.00000000    
   0.00000000    
   0.00000000    
   0.00000000    
   0.00000000    
   0.00000000    
   0.00000000    
   0.00000000    
   0.00000000    
   0.00000000    
   0.00000000    
   0.00000000    
   0.00000000    
   0.00000000    
   0.00000000    
   0.00000000    
   0.00000000    
   0.00000000    
   0.00000000    
   0.00000000    
   0.00000000    
   0.00000000    
   0.00000000    
   0.00000000    
   0.00000000    
   0.00000000    
   0.00000000    
   0.00000000    
   0.00000000    
   0.00000000    
   0.00000000    
   0.00000000    
   0.00000000    
   0.00000000    
   0.00000000    
   0.00000000    
   0.00000000    
   0.00000000    
   0.00000000    
   0.00000000    
   0.00000000    
   0.00000000    
   0.00000000    
   2.00000000    
   3.00000000    
   2.00000000    
   4.00000000    
   2.00000000    
   6.00000000    
   1.00000000    
   1.00000000    
   3.00000000    
   1.00000000    
   1.00000000    
   2.00000000    
   0.00000000    
   0.00000000    
   0.00000000    
   0.00000000    
   0.00000000    
   0.00000000    
   0.00000000    
   0.00000000    
   0.00000000    
   0.00000000    
   0.00000000    
   0.00000000    
   0.00000000    
   0.00000000    
   0.00000000    
   0.00000000    
   0.00000000    
   0.00000000    
   0.00000000    
   0.00000000    
   0.00000000    
   0.00000000    
   0.00000000    
   0.00000000    
   0.00000000    
   0.00000000    
   0.00000000    
   0.00000000    
   0.00000000    
   0.00000000    
   0.00000000    
   0.00000000    
   0.00000000    
   0.00000000    
   0.00000000    
   0.00000000    
   0.00000000    
   0.00000000    
   0.00000000    
   0.00000000    
   0.00000000    
   0.00000000    
   0.00000000    
   0.00000000    
   0.00000000    
   0.00000000    
   0.00000000    
   0.00000000    
   0.00000000    
   0.00000000    
   0.00000000    
   0.00000000    
   0.00000000    
   0.00000000    
   1.00000000    
   1.00000000    
   1.00000000    
   3.00000000    
   1.00000000    
   3.00000000    
   2.00000000    
   1.00000000    
   1.00000000    
   0.00000000    
   0.00000000    
   0.00000000    
   0.00000000    
   0.00000000    
   0.00000000    
   0.00000000    
   0.00000000    
   0.00000000    
   0.00000000    
   0.00000000    
   0.00000000    
   0.00000000    
   0.00000000    
   0.00000000    
   0.00000000    
   0.00000000    
   0.00000000    
   0.00000000    
   0.00000000    
   0.00000000    
   0.00000000    
   0.00000000    
   0.00000000    
   0.00000000    
   0.00000000    
   0.00000000    
   0.00000000    
   0.00000000    
   0.00000000    
   0.00000000    
   0.00000000    
   0.00000000    
   0.00000000    
   0.00000000    
   0.00000000    
   0.00000000    
   0.00000000    
   0.00000000    
   0.00000000    
   0.00000000    
   0.00000000    
   0.00000000    
   0.00000000    
   0.00000000    
   0.00000000    
   0.00000000    
   0.00000000    
   0.00000000    
   0.00000000    
   0.00000000    
   0.00000000    
   0.00000000    
   0.00000000    
   0.00000000    
   0.00000000    
   0.00000000    
   3.00000000    
   2.00000000    
   3.00000000    
   0.00000000    
   1.00000000    
   0.00000000    
   0.00000000    
   0.00000000    
   0.00000000    
   0.00000000    
   0.00000000    
   0.00000000    
   0.00000000    
   0.00000000    
   0.00000000    
   0.00000000    
   0.00000000    
   0.00000000    
   0.00000000    
   0.00000000    
   0.00000000    
   0.00000000    
   0.00000000    
   0.00000000    
   0.00000000    
   0.00000000    
   0.00000000    
   0.00000000    
   0.00000000    
   0.00000000    
   0.00000000    
   0.00000000    
   0.00000000    
   0.00000000    
   0.00000000    
   0.00000000    
   0.00000000    
   0.00000000    
   0.00000000    
   0.00000000    
   0.00000000    
   0.00000000    
   0.00000000    
   0.00000000    
   0.00000000    
   0.00000000    
   0.00000000    
   0.00000000    
   0.00000000    
   0.00000000    
   0.00000000    
   0.00000000    
   0.00000000    
   0.00000000    
   0.00000000    
   0.00000000    
   0.00000000    
   0.00000000    
   0.00000000    
   0.00000000    
   0.00000000    
   0.00000000    
   0.00000000    
   0.00000000    
   0.00000000    
   0.00000000    
   1.00000000    
   0.00000000    
   0.00000000    
   0.00000000    
   0.00000000    
   0.00000000    
   0.00000000    
   0.00000000    
   0.00000000    
   0.00000000    
   0.00000000    
   0.00000000    
   0.00000000    
   0.00000000    
   0.00000000    
   0.00000000    
   0.00000000    
   0.00000000    
   0.00000000    
   0.00000000    
   0.00000000    
   0.00000000    
   0.00000000    
   0.00000000    
   0.00000000    
   0.00000000    
   0.00000000    
   0.00000000    
   0.00000000    
   0.00000000    
   0.00000000    
   0.00000000    
   0.00000000    
   0.00000000    
   0.00000000    
   0.00000000    
   0.00000000    
   0.00000000    
   0.00000000    
   0.00000000    
   0.00000000    
   0.00000000    
   0.00000000    
   0.00000000    
   0.00000000    
   0.00000000    
   0.00000000    
   0.00000000    
   0.00000000    
   0.00000000    
   0.00000000    
   0.00000000    
   0.00000000    
   0.00000000    
   0.00000000    
   0.00000000    
   0.00000000    
   0.00000000    
   0.00000000    
   0.00000000    
   0.00000000    
   0.00000000    
   0.00000000    
   0.00000000    
   0.00000000    
   0.00000000    
   0.00000000    
   0.00000000    
   0.00000000    
   0.00000000    
   0.00000000    
   0.00000000    
   0.00000000    
   0.00000000    
   0.00000000    
   0.00000000    
   0.00000000    
   0.00000000    
   0.00000000    
   0.00000000    
   0.00000000    
   0.00000000    
   0.00000000    
   0.00000000    
   0.00000000    
   0.00000000    
   0.00000000    
   0.00000000    
   0.00000000    
   0.00000000    
   0.00000000    
   0.00000000    
   0.00000000    
   0.00000000    
   0.00000000    
   0.00000000    
   0.00000000    
   0.00000000    
   0.00000000    
   0.00000000    
   0.00000000    
   0.00000000    
   0.00000000    
   0.00000000    
   0.00000000    
   0.00000000    
   0.00000000    
   0.00000000    
   0.00000000    
   0.00000000    
   0.00000000    
   0.00000000    
   0.00000000    
   0.00000000    
   0.00000000    
   0.00000000    
   0.00000000    
   0.00000000    
   0.00000000    
   0.00000000    
   0.00000000    
   0.00000000    
   0.00000000    
   0.00000000    
   0.00000000    
   0.00000000    
   0.00000000    
   0.00000000    
   0.00000000    
   0.00000000    
   0.00000000    
   0.00000000    
   0.00000000    
   0.00000000    
   0.00000000    
   0.00000000    
   0.00000000    
   0.00000000    
   0.00000000    
   0.00000000    
   0.00000000    
   0.00000000    
   0.00000000    
   0.00000000    
   0.00000000    
   0.00000000    
   0.00000000    
   0.00000000    
   0.00000000    
   0.00000000    
   0.00000000    
   0.00000000    
   0.00000000    
   0.00000000    
   0.00000000    
   0.00000000    
   0.00000000    
   0.00000000    
   0.00000000    
   0.00000000    
   0.00000000    
   0.00000000    
   0.00000000    
   0.00000000    
   0.00000000    
   0.00000000    
   0.00000000    
   0.00000000    
   0.00000000    
   0.00000000    
   0.00000000    
   0.00000000    
   0.00000000    
   0.00000000    
   0.00000000    
   0.00000000    
   0.00000000    
   0.00000000    
   0.00000000    
   0.00000000    
   0.00000000    
   0.00000000    
   0.00000000    
   0.00000000    
   0.00000000    
   0.00000000    
   0.00000000    
   0.00000000    
   0.00000000    
   0.00000000    
   0.00000000    
   0.00000000    
   0.00000000    
   0.00000000    
   0.00000000    
   0.00000000    
   0.00000000    
   0.00000000    
   0.00000000    
   0.00000000    
   0.00000000    
   0.00000000    
   0.00000000    
   0.00000000    
   0.00000000    
   0.00000000    
   0.00000000    
   0.00000000    
   0.00000000    
   0.00000000    
   0.00000000    
   0.00000000    
   0.00000000    
   0.00000000    
   0.00000000    
   0.00000000    
   0.00000000    
   0.00000000    
   0.00000000    
   0.00000000    
   0.00000000    
   0.00000000    
   0.00000000    
   0.00000000    
   0.00000000    
   0.00000000    
   0.00000000    
   0.00000000    
   0.00000000    
   0.00000000    
   0.00000000    
   0.00000000    
   0.00000000    
   0.00000000    
   0.00000000    
   0.00000000    
   0.00000000    
   0.00000000    
   0.00000000    
   0.00000000    
   0.00000000    
   0.00000000    
   0.00000000    
   0.00000000    
   0.00000000    
   0.00000000    
   0.00000000    
   0.00000000    
   0.00000000    
   0.00000000    
   0.00000000    
   0.00000000    
   0.00000000    
   0.00000000    
   0.00000000    
   0.00000000    
   0.00000000    
   0.00000000    
   0.00000000    
   0.00000000    
   0.00000000    
   0.00000000    
   0.00000000    
   0.00000000    
   0.00000000    
   0.00000000    
   0.00000000    
   0.00000000    
   0.00000000    
   0.00000000    
   0.00000000    
   0.00000000    
   0.00000000    
   0.00000000    
   0.00000000    
   0.00000000    
   0.00000000    
   0.00000000    
   0.00000000    
   0.00000000    
   0.00000000    
   0.00000000    
   0.00000000    
   0.00000000    
   0.00000000    
   0.00000000    
   0.00000000    
   0.00000000    
   0.00000000    
   0.00000000    
   0.00000000    
   0.00000000    
   0.00000000    
   0.00000000    
   0.00000000    
   0.00000000    
   0.00000000    
   0.00000000    
   0.00000000    
   0.00000000    
   0.00000000    
   0.00000000    
   0.00000000    
   0.00000000    
   0.00000000    
   0.00000000    
   0.00000000    
   0.00000000    
   0.00000000    
   0.00000000    
   0.00000000    
   0.00000000    
   0.00000000    
   0.00000000    
   0.00000000    
   0.00000000    
   0.00000000    
   0.00000000    
   0.00000000    
   0.00000000    
   0.00000000    
   0.00000000    
   0.00000000    
   0.00000000    
   0.00000000    
   0.00000000    
   0.00000000    
   0.00000000    
   0.00000000    
   0.00000000    
   0.00000000    
   0.00000000    
   0.00000000    
   0.00000000    
   0.00000000    
   0.00000000    
   0.00000000    
   0.00000000    
   0.00000000    
   0.00000000    
   0.00000000    
   0.00000000    
   0.00000000    
   0.00000000    
   0.00000000    
   0.00000000    
   0.00000000    
   0.00000000    
   0.00000000    
   0.00000000    
   0.00000000    
   0.00000000    
   0.00000000    
   0.00000000    
   0.00000000    
   0.00000000    
   0.00000000    
   0.00000000    
   0.00000000    
   0.00000000    
   0.00000000    
   0.00000000    
   0.00000000    
   0.00000000    
   0.00000000    
   0.00000000    
   0.00000000    
   0.00000000    
   0.00000000    
   0.00000000    
   0.00000000    
   0.00000000    
   0.00000000    
   0.00000000    
   0.00000000    
   0.00000000    
   0.00000000    
   0.00000000    
   0.00000000    
   0.00000000    
   0.00000000    
   0.00000000    
   0.00000000    
   0.00000000    
   0.00000000    
   0.00000000    
   0.00000000    
   0.00000000    
   0.00000000    
   0.00000000    
   0.00000000    
   0.00000000    
   0.00000000    
   0.00000000    
   0.00000000    
   0.00000000    
   0.00000000    
   0.00000000    
   0.00000000    
   0.00000000    
   0.00000000    
   0.00000000    
   0.00000000    
   0.00000000    
   0.00000000    
   0.00000000    
   0.00000000    
   0.00000000    
   0.00000000    
   0.00000000    
   0.00000000    
   0.00000000    
   0.00000000    
   0.00000000    
   0.00000000    
   0.00000000    
   0.00000000    
   0.00000000    
   0.00000000    
   0.00000000    
   0.00000000    
   0.00000000    
   0.00000000    
   0.00000000    
   0.00000000    
   0.00000000    
   0.00000000    
   0.00000000    
   0.00000000    
   0.00000000    
   0.00000000    
   0.00000000    
   0.00000000    
   0.00000000    
   0.00000000    
   0.00000000    
   0.00000000    
   0.00000000    
   0.00000000    
   0.00000000    
   0.00000000    
   0.00000000    
   0.00000000    
   0.00000000    
   0.00000000    
   0.00000000    
   0.00000000    
   0.00000000    
   0.00000000    
   0.00000000    
   0.00000000    
   0.00000000    
   0.00000000    
   0.00000000    
   0.00000000    
   0.00000000    
   0.00000000    
   0.00000000    
   0.00000000    
   0.00000000    
   0.00000000    
   0.00000000    
   0.00000000    
   0.00000000    
   0.00000000    
   0.00000000    
   0.00000000    
   0.00000000    
   0.00000000    
   0.00000000    
   0.00000000    
   0.00000000    
   0.00000000    
   0.00000000    
   0.00000000    
   0.00000000    
   0.00000000    
   0.00000000    
   0.00000000    
   0.00000000    
   0.00000000    
   0.00000000    
   0.00000000    
   0.00000000    
   0.00000000    
   0.00000000    
   0.00000000    
   0.00000000    
   0.00000000    
   0.00000000    
   0.00000000    
   0.00000000    
   0.00000000    
   0.00000000    
   0.00000000    
   0.00000000    
   0.00000000    
   0.00000000    
   0.00000000    
   0.00000000    
   0.00000000    
   0.00000000    
   0.00000000    
   0.00000000    
   0.00000000    
   0.00000000    
   0.00000000    
   0.00000000    
   0.00000000    
   0.00000000    
   0.00000000    
   0.00000000    
   0.00000000    
   0.00000000    
   0.00000000    
   0.00000000    
   0.00000000    
   0.00000000    
   0.00000000    
   0.00000000    
   0.00000000    
   0.00000000    
   0.00000000    
   0.00000000    
   0.00000000    
   0.00000000    
   0.00000000    
   0.00000000    
   0.00000000    
   0.00000000    
   0.00000000    
   0.00000000    
   0.00000000    
   0.00000000    
   0.00000000    
   0.00000000    
   0.00000000    
   0.00000000    
   0.00000000    
   0.00000000    
   0.00000000    
   0.00000000    
   0.00000000    
   0.00000000    
   0.00000000    
   0.00000000    
   0.00000000    
   0.00000000    
   0.00000000    
   0.00000000    
   0.00000000    
   0.00000000    
   0.00000000    
   0.00000000    
   0.00000000    
   0.00000000    
   0.00000000    
   0.00000000    
   0.00000000    
   0.00000000    
   0.00000000    
   0.00000000    
   0.00000000    
   0.00000000    
   0.00000000    
   0.00000000    
   0.00000000    
   0.00000000    
   0.00000000    
   0.00000000    
   0.00000000    
   0.00000000    
   0.00000000    
   0.00000000    
   0.00000000    
   0.00000000    
   0.00000000    
   0.00000000    
   0.00000000    
   0.00000000    
   0.00000000    
   0.00000000    
   0.00000000    
   0.00000000    
   0.00000000    
   0.00000000    
   0.00000000    
   0.00000000    
   0.00000000    
   0.00000000    
   0.00000000    
   0.00000000    
   0.00000000    
   0.00000000    
   0.00000000    
   0.00000000    
   0.00000000    
   0.00000000    
   0.00000000    
   0.00000000    
   0.00000000    
   0.00000000    
   0.00000000    
   0.00000000    
   0.00000000    
   0.00000000    
   0.00000000    
   0.00000000    
   0.00000000    
   0.00000000    
   0.00000000    
   0.00000000    
   0.00000000    
   0.00000000    
   0.00000000    
   0.00000000    
   0.00000000    
   0.00000000    
   0.00000000    
   0.00000000    
   0.00000000    
   0.00000000    
   0.00000000    
   0.00000000    
   0.00000000    
   0.00000000    
   0.00000000    
   0.00000000    
   0.00000000    
   0.00000000    
   0.00000000    
   0.00000000    
   0.00000000    
   0.00000000    
   0.00000000    
   0.00000000    
   0.00000000    
   0.00000000    
   0.00000000    
   0.00000000    
   0.00000000    
   0.00000000    
   0.00000000    
   0.00000000    
   0.00000000    
   0.00000000    
   0.00000000    
   0.00000000    
   0.00000000    
   0.00000000    
   0.00000000    
   0.00000000    
   0.00000000    
   0.00000000    
   0.00000000    
   0.00000000    
   0.00000000    
   0.00000000    
   0.00000000    
   0.00000000    
   0.00000000    
   0.00000000    
   0.00000000    
   0.00000000    
   0.00000000    
   0.00000000    
   0.00000000    
   0.00000000    
   0.00000000    
   0.00000000    
   0.00000000    
   0.00000000    
   0.00000000    
   0.00000000    
   0.00000000    
   0.00000000    
   0.00000000    
   0.00000000    
   0.00000000    
   0.00000000    
   0.00000000    
   0.00000000    
   0.00000000    
   0.00000000    
   0.00000000    
   0.00000000    
   0.00000000    
   0.00000000    
   0.00000000    
   0.00000000    
   0.00000000    
   0.00000000    
   0.00000000    
   0.00000000    
   0.00000000    
   0.00000000    
   0.00000000    
   0.00000000    
   0.00000000    
   0.00000000    
   0.00000000    
   0.00000000    
   0.00000000    
   0.00000000    
   0.00000000    
   0.00000000    
   0.00000000    
   0.00000000    
   0.00000000    
   0.00000000    
   0.00000000    
   0.00000000    
   0.00000000    
   0.00000000    
   0.00000000    
   0.00000000    
   0.00000000    
   0.00000000    
   0.00000000    
   0.00000000    
   0.00000000    
   0.00000000    
   0.00000000    
   0.00000000    
   0.00000000    
   0.00000000    
   0.00000000    
   0.00000000    
   0.00000000    
   0.00000000    
   0.00000000    
   0.00000000    
   0.00000000    
   0.00000000    
   0.00000000    
   0.00000000    
   0.00000000    
   0.00000000    
   0.00000000    
   0.00000000    
   0.00000000    
   0.00000000    
   0.00000000    
   0.00000000    
   0.00000000    
   0.00000000    
   0.00000000    
   0.00000000    
   0.00000000    
   0.00000000    
   0.00000000    
   0.00000000    
   0.00000000    
   0.00000000    
   0.00000000    
   0.00000000    
   0.00000000    
   0.00000000    
   0.00000000    
   0.00000000    
   0.00000000    
   0.00000000    
   0.00000000    
   0.00000000    
   0.00000000    
   0.00000000    
   0.00000000    
   0.00000000    
   0.00000000    
   0.00000000    
   0.00000000    
   0.00000000    
   0.00000000    
   0.00000000    
   0.00000000    
   0.00000000    
   0.00000000    
   0.00000000    
   0.00000000    
   0.00000000    
   0.00000000    
   0.00000000    
   0.00000000    
   0.00000000    
   0.00000000    
   0.00000000    
   0.00000000    
   0.00000000    
   0.00000000    
   0.00000000    
   0.00000000    
   0.00000000    
   0.00000000    
   0.00000000    
   0.00000000    
   0.00000000    
   0.00000000    
   0.00000000    
   0.00000000    
   0.00000000    
   0.00000000    
   0.00000000    
   0.00000000    
   0.00000000    
   0.00000000    
   0.00000000    
   0.00000000    
   0.00000000    
   0.00000000    
   0.00000000    
   0.00000000    
   0.00000000    
   0.00000000    
   0.00000000    
   0.00000000    
   0.00000000    
   0.00000000    
   0.00000000    
   0.00000000    
   0.00000000    
   0.00000000    
   0.00000000    
   0.00000000    
   0.00000000    
   0.00000000    
   0.00000000    
   0.00000000    
   0.00000000    
   0.00000000    
   0.00000000    
   0.00000000    
   0.00000000    
   0.00000000    
   0.00000000    
   0.00000000    
   0.00000000    
   0.00000000    
   0.00000000    
   0.00000000    
   0.00000000    
   0.00000000    
   0.00000000    
   0.00000000    
   0.00000000    
   0.00000000    
   0.00000000    
   0.00000000    
   0.00000000    
   0.00000000    
   0.00000000    
   0.00000000    
   0.00000000    
   0.00000000    
   0.00000000    
   0.00000000    
   0.00000000    
   0.00000000    
   0.00000000    
   0.00000000    
   0.00000000    
   0.00000000    
   0.00000000    
   0.00000000    
   0.00000000    
   0.00000000    
   0.00000000    
   0.00000000    
   0.00000000    
   0.00000000    
   0.00000000    
   0.00000000    
   0.00000000    
   0.00000000    
   0.00000000    
   0.00000000    
   0.00000000    
   0.00000000    
   0.00000000    
   0.00000000    
   0.00000000    
   0.00000000    
   0.00000000    
   0.00000000    
   0.00000000    
   0.00000000    
   0.00000000    
   0.00000000    
   0.00000000    
   0.00000000    
   0.00000000    
   0.00000000    
   0.00000000    
   0.00000000    
   0.00000000    
   0.00000000    
   0.00000000    
   0.00000000    
   0.00000000    
   0.00000000    
   0.00000000    
   0.00000000    
   0.00000000    
   0.00000000    
   0.00000000    
   0.00000000    
   0.00000000    
   0.00000000    
   0.00000000    
   0.00000000    
   0.00000000    
   0.00000000    
   0.00000000    
   0.00000000    
   0.00000000    
   0.00000000    
   0.00000000    
   0.00000000    
   0.00000000    
   0.00000000    
   0.00000000    
   0.00000000    
   0.00000000    
   0.00000000    
   0.00000000    
   0.00000000    
   0.00000000    
   0.00000000    
   0.00000000    
   0.00000000    
   0.00000000    
   0.00000000    
   0.00000000    
   0.00000000    
   0.00000000    
   0.00000000    
   0.00000000    
   0.00000000    
   0.00000000    
   0.00000000    
   0.00000000    
   0.00000000    
   0.00000000    
   0.00000000    
   0.00000000    
   0.00000000    
   0.00000000    
   0.00000000    
   0.00000000    
   0.00000000    
   0.00000000    
   0.00000000    
   0.00000000    
   0.00000000    
   0.00000000    
   0.00000000    
   0.00000000    
   0.00000000    
   0.00000000    
   0.00000000    
   0.00000000    
   0.00000000    
   0.00000000    
   0.00000000    
   0.00000000    
   0.00000000    
   0.00000000    
   0.00000000    
   0.00000000    
   0.00000000    
   0.00000000    
   0.00000000    
   0.00000000    
   0.00000000    
   0.00000000    
   0.00000000    
   0.00000000    
   0.00000000    
   0.00000000    
   0.00000000    
   0.00000000    
   0.00000000    
   0.00000000    
   0.00000000    
   0.00000000    
   0.00000000    
   0.00000000    
   0.00000000    
   0.00000000    
   0.00000000    
   0.00000000    
   0.00000000    
   0.00000000    
   0.00000000    
   0.00000000    
   0.00000000    
   0.00000000    
   0.00000000    
   0.00000000    
   0.00000000    
   0.00000000    
   0.00000000    
   0.00000000    
   0.00000000    
   0.00000000    
   0.00000000    
   0.00000000    
   0.00000000    
   0.00000000    
   0.00000000    
   0.00000000    
   0.00000000    
   0.00000000    
   0.00000000    
   0.00000000    
   0.00000000    
   0.00000000    
   0.00000000    
   0.00000000    
   0.00000000    
   0.00000000    
   0.00000000    
   0.00000000    
   0.00000000    
   0.00000000    
   0.00000000    
   0.00000000    
   0.00000000    
   0.00000000    
   0.00000000    
   0.00000000    
   0.00000000    
   0.00000000    
   0.00000000    
   0.00000000    
   0.00000000    
   0.00000000    
   0.00000000    
   0.00000000    
   0.00000000    
   0.00000000    
   0.00000000    
   0.00000000    
   0.00000000    
   0.00000000    
   0.00000000    
   0.00000000    
   0.00000000    
   0.00000000    
   0.00000000    
   0.00000000    
   0.00000000    
   0.00000000    
   0.00000000    
   0.00000000    
   0.00000000    
   0.00000000    
   0.00000000    
   0.00000000    
   0.00000000    
   0.00000000    
   0.00000000    
   0.00000000    
   0.00000000    
   0.00000000    
   0.00000000    
   0.00000000    
   0.00000000    
   0.00000000    
   0.00000000    
   0.00000000    
   0.00000000    
   0.00000000    
   0.00000000    
   0.00000000    
   0.00000000    
   0.00000000    
   0.00000000    
   0.00000000    
   0.00000000    
   0.00000000    
   0.00000000    
   0.00000000    
   0.00000000    
   0.00000000    
   0.00000000    
   0.00000000    
   0.00000000    
   0.00000000    
   0.00000000    
   0.00000000    
   0.00000000    
   0.00000000    
   0.00000000    
   0.00000000    
   0.00000000    
   0.00000000    
   0.00000000    
   0.00000000    
   0.00000000    
   0.00000000    
   0.00000000    
   0.00000000    
   0.00000000    
   0.00000000    
   0.00000000    
   0.00000000    
   0.00000000    
   0.00000000    
   0.00000000    
   0.00000000    
   0.00000000    
   0.00000000    
   0.00000000    
   0.00000000    
   0.00000000    
   0.00000000    
   0.00000000    
   0.00000000    
   0.00000000    
   0.00000000    
   0.00000000    
   0.00000000    
   0.00000000    
   0.00000000    
   0.00000000    
   0.00000000    
   0.00000000    
   0.00000000    
   0.00000000    
   0.00000000    
   0.00000000    
   0.00000000    
   0.00000000    
   0.00000000    
   0.00000000    
   0.00000000    
   0.00000000    
   0.00000000    
   0.00000000    
   0.00000000    
   0.00000000    
   0.00000000    
   0.00000000    
   0.00000000    
   0.00000000    
   0.00000000    
   0.00000000    
   0.00000000    
   0.00000000    
   0.00000000    
   0.00000000    
   0.00000000    
   0.00000000    
   0.00000000    
   0.00000000    
   0.00000000    
   0.00000000    
   0.00000000    
   0.00000000    
   0.00000000    
   0.00000000    
   0.00000000    
   0.00000000    
   0.00000000    
   0.00000000    
   0.00000000    
   0.00000000    
   0.00000000    
   0.00000000    
   0.00000000    
   0.00000000    
   0.00000000    
   0.00000000    
   0.00000000    
   0.00000000    
   0.00000000    
   0.00000000    
   0.00000000    
   0.00000000    
   0.00000000    
   0.00000000    
   0.00000000    
   0.00000000    
   0.00000000    
   0.00000000    
   0.00000000    
   0.00000000    
   0.00000000    
   0.00000000    
   0.00000000    
   0.00000000    
   0.00000000    
   0.00000000    
   0.00000000    
   0.00000000    
   0.00000000    
   0.00000000    
   0.00000000    
   0.00000000    
   0.00000000    
   0.00000000    
   0.00000000    
   0.00000000    
   0.00000000    
   0.00000000    
   0.00000000    
   0.00000000    
   0.00000000    
   0.00000000    
   0.00000000    
   0.00000000    
   0.00000000    
   0.00000000    
   0.00000000    
   0.00000000    
   0.00000000    
   0.00000000    
   0.00000000    
   0.00000000    
   0.00000000    
   0.00000000    
   0.00000000    
   0.00000000    
   0.00000000    
   0.00000000    
   0.00000000    
   0.00000000    
   0.00000000    
   0.00000000    
   0.00000000    
   0.00000000    
   0.00000000    
   0.00000000    
   0.00000000    
   0.00000000    
   0.00000000    
   0.00000000    
   0.00000000    
   0.00000000    
   0.00000000    
   0.00000000    
   0.00000000    
   0.00000000    
   0.00000000    
   0.00000000    
   0.00000000    
   0.00000000    
   0.00000000    
   0.00000000    
   0.00000000    
   0.00000000    
   0.00000000    
   0.00000000    
   0.00000000    
   0.00000000    
   0.00000000    
   0.00000000    
   0.00000000    
   0.00000000    
   0.00000000    
   0.00000000    
   0.00000000    
   0.00000000    
   0.00000000    
   0.00000000    
   0.00000000    
   0.00000000    
   0.00000000    
   0.00000000    
   0.00000000    
   0.00000000    
   0.00000000    
   0.00000000    
   0.00000000    
   0.00000000    
   0.00000000    
   0.00000000    
   0.00000000    
   0.00000000    
   0.00000000    
   0.00000000    
   0.00000000    
   0.00000000    
   0.00000000    
   0.00000000    
   0.00000000    
   0.00000000    
   0.00000000    
   0.00000000    
   0.00000000    
   0.00000000    
   0.00000000    
   0.00000000    
   0.00000000    
   0.00000000    
   0.00000000    
   0.00000000    
   0.00000000    
   0.00000000    
   0.00000000    
   0.00000000    
   0.00000000    
   0.00000000    
   0.00000000    
   0.00000000    
   0.00000000    
   0.00000000    
   0.00000000    
   0.00000000    
   0.00000000    
   0.00000000    
   0.00000000    
   0.00000000    
   0.00000000    
   0.00000000    
   0.00000000    
   0.00000000    
   0.00000000    
   0.00000000    
   0.00000000    
   0.00000000    
   0.00000000    
   0.00000000    
   0.00000000    
   0.00000000    
   0.00000000    
   0.00000000    
   0.00000000    
   0.00000000    
   0.00000000    
   0.00000000    
   0.00000000    
   0.00000000    
   0.00000000    
   0.00000000    
   0.00000000    
   0.00000000    
   0.00000000    
   0.00000000    
   0.00000000    
   0.00000000    
   0.00000000    
   0.00000000    
   0.00000000    
   0.00000000    
   0.00000000    
   0.00000000    
   0.00000000    
   0.00000000    
   0.00000000    
   0.00000000    
   0.00000000    
   0.00000000    
   0.00000000    
   0.00000000    
   0.00000000    
   0.00000000    
   0.00000000    
   0.00000000    
   0.00000000    
   0.00000000    
   0.00000000    
   0.00000000    
   0.00000000    
   0.00000000    
   0.00000000    
   0.00000000    
   0.00000000    
   0.00000000    
   0.00000000    
   0.00000000    
   0.00000000    
   0.00000000    
   0.00000000    
   0.00000000    
   0.00000000    
   0.00000000    
   0.00000000    
   0.00000000    
   0.00000000    
   0.00000000    
   0.00000000    
   0.00000000    
   0.00000000    
   0.00000000    
   0.00000000    
   0.00000000    
   0.00000000    
   0.00000000    
   0.00000000    
   0.00000000    
   0.00000000    
   0.00000000    
   0.00000000    
   0.00000000    
   0.00000000    
   0.00000000    
   0.00000000    
   0.00000000    
   0.00000000    
   0.00000000    
   0.00000000    
   0.00000000    
   0.00000000    
   0.00000000    
   0.00000000    
   0.00000000    
   0.00000000    
   0.00000000    
   0.00000000    
   0.00000000    
   0.00000000    
   0.00000000    
   0.00000000    
   0.00000000    
   0.00000000    
   0.00000000    
   0.00000000    
   0.00000000    
   0.00000000    
   0.00000000    
   0.00000000    
   0.00000000    
   0.00000000    
   0.00000000    
   0.00000000    
   0.00000000    
   0.00000000    
   0.00000000    
   0.00000000    
   0.00000000    
   0.00000000    
   0.00000000    
   0.00000000    
   0.00000000    
   0.00000000    
   0.00000000    
   0.00000000    
   0.00000000    
   0.00000000    
   0.00000000    
   0.00000000    
   0.00000000    
   0.00000000    
   0.00000000    
   0.00000000    
   0.00000000    
   0.00000000    
   0.00000000    
   0.00000000    
   0.00000000    
   0.00000000    
   0.00000000    
   0.00000000    
   0.00000000    
   0.00000000    
   0.00000000    
   0.00000000    
   0.00000000    
   0.00000000    
   0.00000000    
   0.00000000    
   0.00000000    
   0.00000000    
   0.00000000    
   0.00000000    
   0.00000000    
   0.00000000    
   0.00000000    
   0.00000000    
   0.00000000    
   0.00000000    
   0.00000000    
   0.00000000    
   0.00000000    
   0.00000000    
   0.00000000    
   0.00000000    
   0.00000000    
   0.00000000    
   0.00000000    
   0.00000000    
   0.00000000    
   0.00000000    
   0.00000000    
   0.00000000    
   0.00000000    
   0.00000000    
   0.00000000    
   0.00000000    
   0.00000000    
   0.00000000    
   0.00000000    
   0.00000000    
   0.00000000    
   0.00000000    
   0.00000000    
   0.00000000    
   0.00000000    
   0.00000000    
   0.00000000    
   0.00000000    
   0.00000000    
   0.00000000    
   0.00000000    
   0.00000000    
   0.00000000    
   0.00000000    
   0.00000000    
   0.00000000    
   0.00000000    
   0.00000000    
   0.00000000    
   0.00000000    
   0.00000000    
   0.00000000    
   0.00000000    
   0.00000000    
   0.00000000    
   0.00000000    
   0.00000000    
   0.00000000    
   0.00000000    
   0.00000000    
   0.00000000    
   0.00000000    
   0.00000000    
   0.00000000    
   0.00000000    
   0.00000000    
   0.00000000    
   0.00000000    
   0.00000000    
   0.00000000    
   0.00000000    
   0.00000000    
   0.00000000    
   0.00000000    
   0.00000000    
   0.00000000    
   0.00000000    
   0.00000000    
   0.00000000    
   0.00000000    
   0.00000000    
   0.00000000    
   0.00000000    
   0.00000000    
   0.00000000    
   0.00000000    
   0.00000000    
   0.00000000    
   0.00000000    
   0.00000000    
   0.00000000    
   0.00000000    
   0.00000000    
   0.00000000    
   0.00000000    
   0.00000000    
   0.00000000    
   0.00000000    
   0.00000000    
   0.00000000    
   0.00000000    
   0.00000000    
   0.00000000    
   0.00000000    
   0.00000000    
   0.00000000    
   0.00000000    
   0.00000000    
   0.00000000    
   0.00000000    
   0.00000000    
   0.00000000    
   0.00000000    
   0.00000000    
   0.00000000    
   0.00000000    
   0.00000000    
   0.00000000    
   0.00000000    
   0.00000000    
   0.00000000    
   0.00000000    
   0.00000000    
   0.00000000    
   0.00000000    
   0.00000000    
   0.00000000    
   0.00000000    
   0.00000000    
   0.00000000    
   0.00000000    
   0.00000000    
   0.00000000    
   0.00000000    
   0.00000000    
   0.00000000    
   0.00000000    
   0.00000000    
   0.00000000    
   0.00000000    
   0.00000000    
   0.00000000    
   0.00000000    
   0.00000000    
   0.00000000    
   0.00000000    
   0.00000000    
   0.00000000    
   0.00000000    
   0.00000000    
   0.00000000    
   0.00000000    
   0.00000000    
   0.00000000    
   0.00000000    
   0.00000000    
   0.00000000    
   0.00000000    
   0.00000000    
   0.00000000    
   0.00000000    
   0.00000000    
   0.00000000    
   0.00000000    
   0.00000000    
   0.00000000    
   0.00000000    
   0.00000000    
   0.00000000    
   0.00000000    
   0.00000000    
   0.00000000    
   0.00000000    
   0.00000000    
   0.00000000    
   0.00000000    
   0.00000000    
   0.00000000    
   0.00000000    
   0.00000000    
   0.00000000    
   0.00000000    
   0.00000000    
   0.00000000    
   0.00000000    
   0.00000000    
   0.00000000    
   0.00000000    
   0.00000000    
   0.00000000    
   0.00000000    
   0.00000000    
   0.00000000    
   0.00000000    
   0.00000000    
   0.00000000    
   0.00000000    
   0.00000000    
   0.00000000    
   0.00000000    
   0.00000000    
   0.00000000    
   0.00000000    
   0.00000000    
   0.00000000    
   0.00000000    
   0.00000000    
   0.00000000    
   0.00000000    
   0.00000000    
   0.00000000    
   0.00000000    
   0.00000000    
   0.00000000    
   0.00000000    
   0.00000000    
   0.00000000    
   0.00000000    
   0.00000000    
   0.00000000    
   0.00000000    
   0.00000000    
   0.00000000    
   0.00000000    
   0.00000000    
   0.00000000    
   0.00000000    
   0.00000000    
   0.00000000    
   0.00000000    
   0.00000000    
   0.00000000    
   0.00000000    
   0.00000000    
   0.00000000    
   0.00000000    
   0.00000000    
   0.00000000    
   0.00000000    
   0.00000000    
   0.00000000    
   0.00000000    
   0.00000000    
   0.00000000    
   0.00000000    
   0.00000000    
   0.00000000    
   0.00000000    
   0.00000000    
   0.00000000    
   0.00000000    
   0.00000000    
   0.00000000    
   0.00000000    
   0.00000000    
   0.00000000    
   0.00000000    
   0.00000000    
   0.00000000    
   0.00000000    
   0.00000000    
   0.00000000    
   0.00000000    
   0.00000000    
   0.00000000    
   0.00000000    
   0.00000000    
   0.00000000    
   0.00000000    
   0.00000000    
   0.00000000    
   0.00000000    
   0.00000000    
   0.00000000    
   0.00000000    
   0.00000000    
   0.00000000    
   0.00000000    
   0.00000000    
   0.00000000    
   0.00000000    
   0.00000000    
   0.00000000    
   0.00000000    
   0.00000000    
   0.00000000    
   0.00000000    
   0.00000000    
   0.00000000    
   0.00000000    
   0.00000000    
   0.00000000    
   0.00000000    
   0.00000000    
   0.00000000    
   0.00000000    
   0.00000000    
   0.00000000    
   0.00000000    
   0.00000000    
   0.00000000    
   0.00000000    
   0.00000000    
   0.00000000    
   0.00000000    
   0.00000000    
   0.00000000    
   0.00000000    
   0.00000000    
   0.00000000    
   0.00000000    
   0.00000000    
   0.00000000    
   0.00000000    
   0.00000000    
   0.00000000    
   0.00000000    
   0.00000000    
   0.00000000    
   0.00000000    
   0.00000000    
   0.00000000    
   0.00000000    
   0.00000000    
   0.00000000    
   0.00000000    
   0.00000000    
   0.00000000    
   0.00000000    
   0.00000000    
   0.00000000    
   0.00000000    
   0.00000000    
   0.00000000    
   0.00000000    
   0.00000000    
   0.00000000    
   0.00000000    
   0.00000000    
   0.00000000    
   0.00000000    
   0.00000000    
   0.00000000    
   0.00000000    
   0.00000000    
   0.00000000    
   0.00000000    
   0.00000000    
   0.00000000    
   0.00000000    
   0.00000000    
   0.00000000    
   0.00000000    
   0.00000000    
   0.00000000    
   0.00000000    
   0.00000000    
   0.00000000    
   0.00000000    
   0.00000000    
   0.00000000    
   0.00000000    
   0.00000000    
   0.00000000    
   0.00000000    
   0.00000000    
   0.00000000    
   0.00000000    
   0.00000000    
   0.00000000    
   0.00000000    
   0.00000000    
   0.00000000    
   0.00000000    
   0.00000000    
   0.00000000    
   0.00000000    
   0.00000000    
   0.00000000    
   0.00000000    
   0.00000000    
   0.00000000    
   0.00000000    
   0.00000000    
   0.00000000    
   0.00000000    
   0.00000000    
   0.00000000    
   0.00000000    
   0.00000000    
   0.00000000    
   0.00000000    
   0.00000000    
   0.00000000    
   0.00000000    
   0.00000000    
   0.00000000    
   0.00000000    
   0.00000000    
   0.00000000    
   0.00000000    
   0.00000000    
   0.00000000    
   0.00000000    
   0.00000000    
   0.00000000    
   0.00000000    
   0.00000000    
   0.00000000    
   0.00000000    
   0.00000000    
   0.00000000    
   0.00000000    
   0.00000000    
   0.00000000    
   0.00000000    
   0.00000000    
   0.00000000    
   0.00000000    
   0.00000000    
   0.00000000    
   0.00000000    
   0.00000000    
   0.00000000    
   0.00000000    
   0.00000000    
   0.00000000    
   0.00000000    
   0.00000000    
   0.00000000    
   0.00000000    
   0.00000000    
   0.00000000    
   0.00000000    
   0.00000000    
   0.00000000    
   0.00000000    
   0.00000000    
   0.00000000    
   0.00000000    
   0.00000000    
   0.00000000    
   0.00000000    
   0.00000000    
   0.00000000    
   0.00000000    
   0.00000000    
   0.00000000    
   0.00000000    
   0.00000000    
   0.00000000    
   0.00000000    
   0.00000000    
   0.00000000    
   0.00000000    
   0.00000000    
   0.00000000    
   0.00000000    
   0.00000000    
   0.00000000    
   0.00000000    
   0.00000000    
   0.00000000    
   0.00000000    
   0.00000000    
   0.00000000    
   0.00000000    
   0.00000000    
   0.00000000    
   0.00000000    
   0.00000000    
   0.00000000    
   0.00000000    
   0.00000000    
   0.00000000    
   0.00000000    
   0.00000000    
   0.00000000    
   0.00000000    
   0.00000000    
   0.00000000    
   0.00000000    
   0.00000000    
   0.00000000    
   0.00000000    
   0.00000000    
   0.00000000    
   0.00000000    
   0.00000000    
   0.00000000    
   0.00000000    
   0.00000000    
   0.00000000    
   0.00000000    
   0.00000000    
   0.00000000    
   0.00000000    
   0.00000000    
   0.00000000    
   0.00000000    
   0.00000000    
   0.00000000    
   0.00000000    
   0.00000000    
   0.00000000    
   0.00000000    
   0.00000000    
   0.00000000    
   0.00000000    
   0.00000000    
   0.00000000    
   0.00000000    
   0.00000000    
   0.00000000    
   0.00000000    
   0.00000000    
   0.00000000    
   0.00000000    
   0.00000000    
   0.00000000    
   0.00000000    
   0.00000000    
   0.00000000    
   0.00000000    
   0.00000000    
   0.00000000    
   0.00000000    
   0.00000000    
   0.00000000    
   0.00000000    
   0.00000000    
   0.00000000    
   0.00000000    
   0.00000000    
   0.00000000    
   0.00000000    
   0.00000000    
   0.00000000    
   0.00000000    
   0.00000000    
   0.00000000    
   0.00000000    
   0.00000000    
   0.00000000    
   0.00000000    
   0.00000000    
   0.00000000    
   0.00000000    
   0.00000000    
   0.00000000    
   0.00000000    
   0.00000000    
   0.00000000    
   0.00000000    
   0.00000000    
   0.00000000    
   0.00000000    
   0.00000000    
   0.00000000    
   0.00000000    
   0.00000000    
   0.00000000    
   0.00000000    
   0.00000000    
   0.00000000    
   0.00000000    
   0.00000000    
   0.00000000    
   0.00000000    
   0.00000000    
   0.00000000    
   0.00000000    
   0.00000000    
   0.00000000    
   0.00000000    
   0.00000000    
   0.00000000    
   0.00000000    
   0.00000000    
   0.00000000    
   0.00000000    
   0.00000000    
   0.00000000    
   0.00000000    
   0.00000000    
   0.00000000    
   0.00000000    
   0.00000000    
   0.00000000    
   0.00000000    
   0.00000000    
   0.00000000    
   0.00000000    
   0.00000000    
   0.00000000    
   0.00000000    
   0.00000000    
   0.00000000    
   0.00000000    
   0.00000000    
   0.00000000    
   0.00000000    
   0.00000000    
   0.00000000    
   0.00000000    
   0.00000000    
   0.00000000    
   0.00000000    
   0.00000000    
   0.00000000    
   0.00000000    
   0.00000000    
   0.00000000    
   0.00000000    
   0.00000000    
   0.00000000    
   0.00000000    
   0.00000000    
   0.00000000    
   0.00000000    
   0.00000000    
   0.00000000    
   0.00000000    
   0.00000000    
   0.00000000    
   0.00000000    
   0.00000000    
   0.00000000    
   0.00000000    
   0.00000000    
   0.00000000    
   0.00000000    
   0.00000000    
   0.00000000    
   0.00000000    
   0.00000000    
   0.00000000    
   0.00000000    
   0.00000000    
   0.00000000    
   0.00000000    
   0.00000000    
   0.00000000    
   0.00000000    
   0.00000000    
   0.00000000    
   0.00000000    
   0.00000000    
   0.00000000    
   0.00000000    
   0.00000000    
   0.00000000    
   0.00000000    
   0.00000000    
   0.00000000    
   0.00000000    
   0.00000000    
   0.00000000    
   0.00000000    
   0.00000000    
   0.00000000    
   0.00000000    
   0.00000000    
   0.00000000    
   0.00000000    
   0.00000000    
   0.00000000    
   0.00000000    
   0.00000000    
   0.00000000    
   0.00000000    
   0.00000000    
   0.00000000    
   0.00000000    
   0.00000000    
   0.00000000    
   0.00000000    
   0.00000000    
   0.00000000    
   0.00000000    
   0.00000000    
   0.00000000    
   0.00000000    
   0.00000000    
   0.00000000    
   0.00000000    
   0.00000000    
   0.00000000    
   0.00000000    
   0.00000000    
   0.00000000    
   0.00000000    
   0.00000000    
   0.00000000    
   0.00000000    
   0.00000000    
   0.00000000    
   0.00000000    
   0.00000000    
   0.00000000    
   0.00000000    
   0.00000000    
   0.00000000    
   0.00000000    
   0.00000000    
   0.00000000    
   0.00000000    
   0.00000000    
   0.00000000    
   0.00000000    
   0.00000000    
   0.00000000    
   0.00000000    
   0.00000000    
   0.00000000    
   0.00000000    
   0.00000000    
   0.00000000    
   0.00000000    
   0.00000000    
   0.00000000    
   0.00000000    
   0.00000000    
   0.00000000    
   0.00000000    
   0.00000000    
   0.00000000    
   0.00000000    
   0.00000000    
   0.00000000    
   0.00000000    
   0.00000000    
   0.00000000    
   0.00000000    
   0.00000000    
   0.00000000    
   0.00000000    
   0.00000000    
   0.00000000    
   0.00000000    
   0.00000000    
   0.00000000    
   0.00000000    
   0.00000000    
   0.00000000    
   0.00000000    
   0.00000000    
   0.00000000    
   0.00000000    
   0.00000000    
   0.00000000    
   0.00000000    
   0.00000000    
   0.00000000    
   0.00000000    
   0.00000000    
   0.00000000    
   0.00000000    
   0.00000000    
   0.00000000    
   0.00000000    
   0.00000000    
   0.00000000    
   0.00000000    
   0.00000000    
   0.00000000    
   0.00000000    
   0.00000000    
   0.00000000    
   0.00000000    
   0.00000000    
   0.00000000    
   0.00000000    
   0.00000000    
   0.00000000    
   0.00000000    
   0.00000000    
   0.00000000    
   0.00000000    
   0.00000000    
   0.00000000    
   0.00000000    
   0.00000000    
   0.00000000    
   0.00000000    
   0.00000000    
   0.00000000    
   0.00000000    
   0.00000000    
   0.00000000    
   0.00000000    
   0.00000000    
   0.00000000    
   0.00000000    
   0.00000000    
   0.00000000    
   0.00000000    
   0.00000000    
   0.00000000    
   0.00000000    
   0.00000000    
   0.00000000    
   0.00000000    
   0.00000000    
   0.00000000    
   0.00000000    
   0.00000000    
   0.00000000    
   0.00000000    
   0.00000000    
   0.00000000    
   0.00000000    
   0.00000000    
   0.00000000    
   0.00000000    
   0.00000000    
   0.00000000    
   0.00000000    
   0.00000000    
   0.00000000    
   0.00000000    
   0.00000000    
   0.00000000    
   0.00000000    
   0.00000000    
   0.00000000    
   0.00000000    
   0.00000000    
   0.00000000    
   0.00000000    
   0.00000000    
   0.00000000    
   0.00000000    
   0.00000000    
   0.00000000    
   0.00000000    
   0.00000000    
   0.00000000    
   0.00000000    
   0.00000000    
   0.00000000    
   0.00000000    
   0.00000000    
   0.00000000    
   0.00000000    
   0.00000000    
   0.00000000    
   0.00000000    
   0.00000000    
   0.00000000    
   0.00000000    
   0.00000000    
   0.00000000    
   0.00000000    
   0.00000000    
   0.00000000    
   0.00000000    
   0.00000000    
   0.00000000    
   0.00000000    
   0.00000000    
   0.00000000    
   0.00000000    
   0.00000000    
   0.00000000    
   0.00000000    
   0.00000000    
   0.00000000    
   0.00000000    
   0.00000000    
   0.00000000    
   0.00000000    
   0.00000000    
   0.00000000    
   0.00000000    
   0.00000000    
   0.00000000    
   0.00000000    
   0.00000000    
   0.00000000    
   0.00000000    
   0.00000000    
   0.00000000    
   0.00000000    
   0.00000000    
   0.00000000    
   0.00000000    
   0.00000000    
   0.00000000    
   0.00000000    
   0.00000000    
   0.00000000    
   0.00000000    
   0.00000000    
   0.00000000    
   0.00000000    
   0.00000000    
   0.00000000    
   0.00000000    
   0.00000000    
   0.00000000    
   0.00000000    
   0.00000000    
   0.00000000    
   0.00000000    
   0.00000000    
   0.00000000    
   0.00000000    
   0.00000000    
   0.00000000    
   0.00000000    
   0.00000000    
   0.00000000    
   0.00000000    
   0.00000000    
   0.00000000    
   0.00000000    
   0.00000000    
   0.00000000    
   0.00000000    
   0.00000000    
   0.00000000    
   0.00000000    
   0.00000000    
   0.00000000    
   0.00000000    
   0.00000000    
   0.00000000    
   0.00000000    
   0.00000000    
   0.00000000    
   0.00000000    
   0.00000000    
   0.00000000    
   0.00000000    
   0.00000000    
   0.00000000    
   0.00000000    
   0.00000000    
   0.00000000    
   0.00000000    
   0.00000000    
   0.00000000    
   0.00000000    
   0.00000000    
   0.00000000    
   0.00000000    
   0.00000000    
   0.00000000    
   0.00000000    
   0.00000000    
   0.00000000    
   0.00000000    
   0.00000000    
   0.00000000    
   0.00000000    
   0.00000000    
   0.00000000    
   0.00000000    
   0.00000000    
   0.00000000    
   0.00000000    
   0.00000000    
   0.00000000    
   0.00000000    
   0.00000000    
   0.00000000    
   0.00000000    
   0.00000000    
   0.00000000    
   0.00000000    
   0.00000000    
   0.00000000    
   0.00000000    
   0.00000000    
   0.00000000    
   0.00000000    
   0.00000000    
   0.00000000    
   0.00000000    
   0.00000000    
   0.00000000    
   0.00000000    
   0.00000000    
   0.00000000    
   0.00000000    
   0.00000000    
   0.00000000    
   0.00000000    
   0.00000000    
   0.00000000    
   0.00000000    
   0.00000000    
   0.00000000    
   0.00000000    
   0.00000000    
   0.00000000    
   0.00000000    
   0.00000000    
   0.00000000    
   0.00000000    
   0.00000000    
   0.00000000    
   0.00000000    
   0.00000000    
   0.00000000    
   0.00000000    
   0.00000000    
   0.00000000    
   0.00000000    
   0.00000000    
   0.00000000    
   0.00000000    
   0.00000000    
   0.00000000    
   0.00000000    
   0.00000000    
   0.00000000    
   0.00000000    
   0.00000000    
   0.00000000    
   0.00000000    
   0.00000000    
   0.00000000    
   0.00000000    
   0.00000000    
   0.00000000    
   0.00000000    
   0.00000000    
   0.00000000    
   2.00000000    
   0.00000000    
   0.00000000    
   0.00000000    
   0.00000000    
   0.00000000    
   0.00000000    
   0.00000000    
   0.00000000    
   0.00000000    
   0.00000000    
   0.00000000    
   0.00000000    
   0.00000000    
   0.00000000    
   0.00000000    
   0.00000000    
   0.00000000    
   0.00000000    
   0.00000000    
   0.00000000    
   0.00000000    
   0.00000000    
   0.00000000    
   0.00000000    
   0.00000000    
   0.00000000    
   0.00000000    
   0.00000000    
   0.00000000    
   0.00000000    
   0.00000000    
   0.00000000    
   0.00000000    
   0.00000000    
   0.00000000    
   0.00000000    
   0.00000000    
   0.00000000    
   0.00000000    
   0.00000000    
   0.00000000    
   0.00000000    
   0.00000000    
   0.00000000    
   0.00000000    
   0.00000000    
   0.00000000    
   0.00000000    
   0.00000000    
   0.00000000    
   0.00000000    
   0.00000000    
   0.00000000    
   0.00000000    
   0.00000000    
   0.00000000    
   0.00000000    
   0.00000000    
   0.00000000    
   0.00000000    
   0.00000000    
   1.00000000    
   0.00000000    
   0.00000000    
   0.00000000    
   0.00000000    
   0.00000000    
   0.00000000    
   0.00000000    
   1.00000000    
   1.00000000    
   0.00000000    
   0.00000000    
   0.00000000    
   0.00000000    
   0.00000000    
   0.00000000    
   0.00000000    
   0.00000000    
   0.00000000    
   0.00000000    
   0.00000000    
   0.00000000    
   0.00000000    
   0.00000000    
   0.00000000    
   0.00000000    
   0.00000000    
   0.00000000    
   0.00000000    
   0.00000000    
   0.00000000    
   0.00000000    
   0.00000000    
   0.00000000    
   0.00000000    
   0.00000000    
   0.00000000    
   0.00000000    
   0.00000000    
   0.00000000    
   0.00000000    
   0.00000000    
   0.00000000    
   0.00000000    
   0.00000000    
   0.00000000    
   0.00000000    
   0.00000000    
   0.00000000    
   0.00000000    
   0.00000000    
   0.00000000    
   0.00000000    
   0.00000000    
   0.00000000    
   0.00000000    
   0.00000000    
   0.00000000    
   0.00000000    
   0.00000000    
   0.00000000    
   0.00000000    
   1.00000000    
   0.00000000    
   0.00000000    
   0.00000000    
   0.00000000    
   0.00000000    
   2.00000000    
   1.00000000    
   1.00000000    
   0.00000000    
   0.00000000    
   0.00000000    
   0.00000000    
   0.00000000    
   2.00000000    
   0.00000000    
   0.00000000    
   0.00000000    
   0.00000000    
   0.00000000    
   0.00000000    
   0.00000000    
   0.00000000    
   0.00000000    
   0.00000000    
   0.00000000    
   0.00000000    
   0.00000000    
   0.00000000    
   0.00000000    
   0.00000000    
   0.00000000    
   0.00000000    
   0.00000000    
   0.00000000    
   0.00000000    
   0.00000000    
   0.00000000    
   0.00000000    
   0.00000000    
   0.00000000    
   0.00000000    
   0.00000000    
   0.00000000    
   0.00000000    
   0.00000000    
   0.00000000    
   0.00000000    
   0.00000000    
   0.00000000    
   0.00000000    
   0.00000000    
   0.00000000    
   0.00000000    
   0.00000000    
   0.00000000    
   0.00000000    
   0.00000000    
   0.00000000    
   0.00000000    
   0.00000000    
   1.00000000    
   2.00000000    
   2.00000000    
   1.00000000    
   0.00000000    
   2.00000000    
   2.00000000    
   2.00000000    
   0.00000000    
   2.00000000    
   0.00000000    
   3.00000000    
   1.00000000    
   0.00000000    
   0.00000000    
   0.00000000    
   0.00000000    
   0.00000000    
   0.00000000    
   0.00000000    
   0.00000000    
   0.00000000    
   0.00000000    
   0.00000000    
   0.00000000    
   0.00000000    
   0.00000000    
   0.00000000    
   0.00000000    
   0.00000000    
   0.00000000    
   0.00000000    
   0.00000000    
   0.00000000    
   0.00000000    
   0.00000000    
   0.00000000    
   0.00000000    
   0.00000000    
   0.00000000    
   0.00000000    
   0.00000000    
   0.00000000    
   0.00000000    
   0.00000000    
   0.00000000    
   0.00000000    
   0.00000000    
   0.00000000    
   0.00000000    
   0.00000000    
   0.00000000    
   0.00000000    
   0.00000000    
   0.00000000    
   0.00000000    
   0.00000000    
   0.00000000    
   0.00000000    
   0.00000000    
   0.00000000    
   0.00000000    
   0.00000000    
   0.00000000    
   0.00000000    
   1.00000000    
   1.00000000    
   2.00000000    
   1.00000000    
   1.00000000    
   2.00000000    
   0.00000000    
   0.00000000    
   0.00000000    
   2.00000000    
   2.00000000    
   1.00000000    
   0.00000000    
   0.00000000    
   1.00000000    
   0.00000000    
   0.00000000    
   1.00000000    
   0.00000000    
   0.00000000    
   0.00000000    
   0.00000000    
   0.00000000    
   0.00000000    
   0.00000000    
   0.00000000    
   0.00000000    
   0.00000000    
   0.00000000    
   0.00000000    
   0.00000000    
   0.00000000    
   0.00000000    
   0.00000000    
   0.00000000    
   0.00000000    
   0.00000000    
   0.00000000    
   0.00000000    
   0.00000000    
   0.00000000    
   0.00000000    
   0.00000000    
   0.00000000    
   0.00000000    
   0.00000000    
   0.00000000    
   0.00000000    
   0.00000000    
   0.00000000    
   0.00000000    
   0.00000000    
   0.00000000    
   0.00000000    
   0.00000000    
   0.00000000    
   0.00000000    
   0.00000000    
   0.00000000    
   0.00000000    
   0.00000000    
   0.00000000    
   0.00000000    
   1.00000000    
   1.00000000    
   0.00000000    
   2.00000000    
   3.00000000    
   2.00000000    
   1.00000000    
   2.00000000    
   0.00000000    
   0.00000000    
   1.00000000    
   2.00000000    
   0.00000000    
   0.00000000    
   0.00000000    
   0.00000000    
   0.00000000    
   1.00000000    
   0.00000000    
   0.00000000    
   1.00000000    
   0.00000000    
   0.00000000    
   0.00000000    
   0.00000000    
   0.00000000    
   0.00000000    
   0.00000000    
   0.00000000    
   0.00000000    
   0.00000000    
   0.00000000    
   0.00000000    
   0.00000000    
   0.00000000    
   0.00000000    
   0.00000000    
   0.00000000    
   0.00000000    
   0.00000000    
   0.00000000    
   0.00000000    
   0.00000000    
   0.00000000    
   0.00000000    
   0.00000000    
   0.00000000    
   0.00000000    
   0.00000000    
   0.00000000    
   0.00000000    
   0.00000000    
   0.00000000    
   0.00000000    
   0.00000000    
   0.00000000    
   0.00000000    
   0.00000000    
   0.00000000    
   0.00000000    
   0.00000000    
   0.00000000    
   0.00000000    
   0.00000000    
   0.00000000    
   0.00000000    
   2.00000000    
   0.00000000    
   1.00000000    
   0.00000000    
   1.00000000    
   0.00000000    
   1.00000000    
   1.00000000    
   0.00000000    
   0.00000000    
   2.00000000    
   0.00000000    
   0.00000000    
   0.00000000    
   1.00000000    
   0.00000000    
   1.00000000    
   0.00000000    
   3.00000000    
   0.00000000    
   0.00000000    
   0.00000000    
   0.00000000    
   0.00000000    
   0.00000000    
   0.00000000    
   0.00000000    
   0.00000000    
   0.00000000    
   0.00000000    
   0.00000000    
   0.00000000    
   0.00000000    
   0.00000000    
   0.00000000    
   0.00000000    
   0.00000000    
   0.00000000    
   0.00000000    
   0.00000000    
   0.00000000    
   0.00000000    
   0.00000000    
   0.00000000    
   0.00000000    
   0.00000000    
   0.00000000    
   0.00000000    
   0.00000000    
   0.00000000    
   0.00000000    
   0.00000000    
   0.00000000    
   0.00000000    
   0.00000000    
   0.00000000    
   0.00000000    
   0.00000000    
   0.00000000    
   0.00000000    
   0.00000000    
   0.00000000    
   0.00000000    
   1.00000000    
   1.00000000    
   0.00000000    
   1.00000000    
   2.00000000    
   0.00000000    
   0.00000000    
   0.00000000    
   0.00000000    
   0.00000000    
   2.00000000    
   2.00000000    
   1.00000000    
   2.00000000    
   0.00000000    
   1.00000000    
   1.00000000    
   0.00000000    
   0.00000000    
   1.00000000    
   0.00000000    
   0.00000000    
   0.00000000    
   0.00000000    
   0.00000000    
   0.00000000    
   0.00000000    
   0.00000000    
   0.00000000    
   0.00000000    
   0.00000000    
   0.00000000    
   0.00000000    
   0.00000000    
   0.00000000    
   0.00000000    
   0.00000000    
   0.00000000    
   0.00000000    
   0.00000000    
   0.00000000    
   0.00000000    
   0.00000000    
   0.00000000    
   0.00000000    
   0.00000000    
   0.00000000    
   0.00000000    
   0.00000000    
   0.00000000    
   0.00000000    
   0.00000000    
   0.00000000    
   0.00000000    
   0.00000000    
   0.00000000    
   0.00000000    
   0.00000000    
   0.00000000    
   0.00000000    
   1.00000000    
   1.00000000    
   1.00000000    
   0.00000000    
   0.00000000    
   0.00000000    
   0.00000000    
   0.00000000    
   2.00000000    
   0.00000000    
   0.00000000    
   3.00000000    
   2.00000000    
   3.00000000    
   2.00000000    
   0.00000000    
   0.00000000    
   1.00000000    
   0.00000000    
   0.00000000    
   0.00000000    
   1.00000000    
   1.00000000    
   0.00000000    
   0.00000000    
   0.00000000    
   0.00000000    
   0.00000000    
   0.00000000    
   0.00000000    
   0.00000000    
   0.00000000    
   0.00000000    
   0.00000000    
   0.00000000    
   0.00000000    
   0.00000000    
   0.00000000    
   0.00000000    
   0.00000000    
   0.00000000    
   0.00000000    
   0.00000000    
   0.00000000    
   0.00000000    
   0.00000000    
   0.00000000    
   0.00000000    
   0.00000000    
   0.00000000    
   0.00000000    
   0.00000000    
   0.00000000    
   0.00000000    
   0.00000000    
   0.00000000    
   0.00000000    
   0.00000000    
   0.00000000    
   0.00000000    
   0.00000000    
   0.00000000    
   0.00000000    
   0.00000000    
   0.00000000    
   0.00000000    
   0.00000000    
   0.00000000    
   2.00000000    
   1.00000000    
   0.00000000    
   1.00000000    
   1.00000000    
   0.00000000    
   2.00000000    
   2.00000000    
   3.00000000    
   1.00000000    
   1.00000000    
   1.00000000    
   0.00000000    
   0.00000000    
   0.00000000    
   0.00000000    
   0.00000000    
   1.00000000    
   3.00000000    
   0.00000000    
   3.00000000    
   0.00000000    
   0.00000000    
   0.00000000    
   0.00000000    
   0.00000000    
   0.00000000    
   0.00000000    
   0.00000000    
   0.00000000    
   0.00000000    
   0.00000000    
   0.00000000    
   0.00000000    
   0.00000000    
   0.00000000    
   0.00000000    
   0.00000000    
   0.00000000    
   0.00000000    
   0.00000000    
   0.00000000    
   0.00000000    
   0.00000000    
   0.00000000    
   0.00000000    
   0.00000000    
   0.00000000    
   0.00000000    
   0.00000000    
   0.00000000    
   0.00000000    
   0.00000000    
   0.00000000    
   0.00000000    
   0.00000000    
   0.00000000    
   0.00000000    
   0.00000000    
   0.00000000    
   0.00000000    
   0.00000000    
   1.00000000    
   1.00000000    
   1.00000000    
   1.00000000    
   0.00000000    
   2.00000000    
   2.00000000    
   1.00000000    
   0.00000000    
   0.00000000    
   1.00000000    
   1.00000000    
   0.00000000    
   0.00000000    
   3.00000000    
   1.00000000    
   1.00000000    
   0.00000000    
   1.00000000    
   0.00000000    
   0.00000000    
   1.00000000    
   1.00000000    
   1.00000000    
   0.00000000    
   0.00000000    
   0.00000000    
   0.00000000    
   0.00000000    
   0.00000000    
   0.00000000    
   0.00000000    
   0.00000000    
   0.00000000    
   0.00000000    
   0.00000000    
   0.00000000    
   0.00000000    
   0.00000000    
   0.00000000    
   0.00000000    
   0.00000000    
   0.00000000    
   0.00000000    
   0.00000000    
   0.00000000    
   0.00000000    
   0.00000000    
   0.00000000    
   0.00000000    
   0.00000000    
   0.00000000    
   0.00000000    
   0.00000000    
   0.00000000    
   0.00000000    
   0.00000000    
   0.00000000    
   0.00000000    
   0.00000000    
   0.00000000    
   1.00000000    
   1.00000000    
   1.00000000    
   0.00000000    
   0.00000000    
   0.00000000    
   0.00000000    
   1.00000000    
   3.00000000    
   2.00000000    
   0.00000000    
   0.00000000    
   0.00000000    
   1.00000000    
   3.00000000    
   1.00000000    
   4.00000000    
   1.00000000    
   0.00000000    
   2.00000000    
   0.00000000    
   2.00000000    
   1.00000000    
   0.00000000    
   2.00000000    
   1.00000000    
   0.00000000    
   0.00000000    
   0.00000000    
   0.00000000    
   0.00000000    
   0.00000000    
   0.00000000    
   0.00000000    
   0.00000000    
   0.00000000    
   0.00000000    
   0.00000000    
   0.00000000    
   0.00000000    
   0.00000000    
   0.00000000    
   0.00000000    
   0.00000000    
   0.00000000    
   0.00000000    
   0.00000000    
   0.00000000    
   0.00000000    
   0.00000000    
   0.00000000    
   0.00000000    
   0.00000000    
   0.00000000    
   0.00000000    
   0.00000000    
   0.00000000    
   0.00000000    
   0.00000000    
   0.00000000    
   0.00000000    
   0.00000000    
   0.00000000    
   0.00000000    
   0.00000000    
   0.00000000    
   0.00000000    
   0.00000000    
   1.00000000    
   0.00000000    
   1.00000000    
   1.00000000    
   0.00000000    
   2.00000000    
   0.00000000    
   1.00000000    
   0.00000000    
   5.00000000    
   0.00000000    
   3.00000000    
   2.00000000    
   2.00000000    
   3.00000000    
   3.00000000    
   0.00000000    
   0.00000000    
   1.00000000    
   0.00000000    
   0.00000000    
   1.00000000    
   0.00000000    
   0.00000000    
   0.00000000    
   0.00000000    
   0.00000000    
   0.00000000    
   0.00000000    
   0.00000000    
   0.00000000    
   0.00000000    
   0.00000000    
   0.00000000    
   0.00000000    
   0.00000000    
   0.00000000    
   0.00000000    
   0.00000000    
   0.00000000    
   0.00000000    
   0.00000000    
   0.00000000    
   0.00000000    
   0.00000000    
   0.00000000    
   0.00000000    
   0.00000000    
   0.00000000    
   0.00000000    
   0.00000000    
   0.00000000    
   0.00000000    
   0.00000000    
   0.00000000    
   0.00000000    
   0.00000000    
   0.00000000    
   0.00000000    
   0.00000000    
   0.00000000    
   0.00000000    
   0.00000000    
   0.00000000    
   0.00000000    
   2.00000000    
   1.00000000    
   0.00000000    
   1.00000000    
   1.00000000    
   1.00000000    
   3.00000000    
   1.00000000    
   0.00000000    
   1.00000000    
   1.00000000    
   2.00000000    
   1.00000000    
   0.00000000    
   1.00000000    
   1.00000000    
   1.00000000    
   0.00000000    
   0.00000000    
   0.00000000    
   0.00000000    
   0.00000000    
   0.00000000    
   0.00000000    
   0.00000000    
   0.00000000    
   0.00000000    
   0.00000000    
   0.00000000    
   0.00000000    
   0.00000000    
   0.00000000    
   0.00000000    
   0.00000000    
   0.00000000    
   0.00000000    
   0.00000000    
   0.00000000    
   0.00000000    
   0.00000000    
   0.00000000    
   0.00000000    
   0.00000000    
   0.00000000    
   0.00000000    
   0.00000000    
   0.00000000    
   0.00000000    
   0.00000000    
   0.00000000    
   0.00000000    
   0.00000000    
   0.00000000    
   0.00000000    
   0.00000000    
   0.00000000    
   0.00000000    
   0.00000000    
   0.00000000    
   0.00000000    
   0.00000000    
   0.00000000    
   0.00000000    
   0.00000000    
   0.00000000    
   2.00000000    
   0.00000000    
   2.00000000    
   0.00000000    
   0.00000000    
   2.00000000    
   0.00000000    
   1.00000000    
   2.00000000    
   0.00000000    
   1.00000000    
   2.00000000    
   2.00000000    
   2.00000000    
   0.00000000    
   0.00000000    
   2.00000000    
   0.00000000    
   0.00000000    
   0.00000000    
   0.00000000    
   1.00000000    
   0.00000000    
   0.00000000    
   0.00000000    
   0.00000000    
   0.00000000    
   0.00000000    
   0.00000000    
   0.00000000    
   0.00000000    
   0.00000000    
   0.00000000    
   0.00000000    
   0.00000000    
   0.00000000    
   0.00000000    
   0.00000000    
   0.00000000    
   0.00000000    
   0.00000000    
   0.00000000    
   0.00000000    
   0.00000000    
   0.00000000    
   0.00000000    
   0.00000000    
   0.00000000    
   0.00000000    
   0.00000000    
   0.00000000    
   0.00000000    
   0.00000000    
   0.00000000    
   0.00000000    
   0.00000000    
   0.00000000    
   0.00000000    
   0.00000000    
   0.00000000    
   1.00000000    
   1.00000000    
   1.00000000    
   0.00000000    
   0.00000000    
   0.00000000    
   0.00000000    
   1.00000000    
   1.00000000    
   3.00000000    
   0.00000000    
   1.00000000    
   2.00000000    
   4.00000000    
   1.00000000    
   2.00000000    
   1.00000000    
   1.00000000    
   0.00000000    
   0.00000000    
   0.00000000    
   2.00000000    
   1.00000000    
   0.00000000    
   0.00000000    
   0.00000000    
   0.00000000    
   0.00000000    
   0.00000000    
   0.00000000    
   0.00000000    
   0.00000000    
   0.00000000    
   0.00000000    
   0.00000000    
   0.00000000    
   0.00000000    
   0.00000000    
   0.00000000    
   0.00000000    
   0.00000000    
   0.00000000    
   0.00000000    
   0.00000000    
   0.00000000    
   0.00000000    
   0.00000000    
   0.00000000    
   0.00000000    
   0.00000000    
   0.00000000    
   0.00000000    
   0.00000000    
   0.00000000    
   0.00000000    
   0.00000000    
   0.00000000    
   0.00000000    
   0.00000000    
   0.00000000    
   0.00000000    
   0.00000000    
   1.00000000    
   1.00000000    
   2.00000000    
   1.00000000    
   1.00000000    
   0.00000000    
   0.00000000    
   1.00000000    
   5.00000000    
   2.00000000    
   0.00000000    
   1.00000000    
   3.00000000    
   0.00000000    
   1.00000000    
   2.00000000    
   0.00000000    
   1.00000000    
   0.00000000    
   0.00000000    
   0.00000000    
   2.00000000    
   0.00000000    
   2.00000000    
   0.00000000    
   0.00000000    
   1.00000000    
   0.00000000    
   0.00000000    
   0.00000000    
   0.00000000    
   0.00000000    
   0.00000000    
   0.00000000    
   0.00000000    
   0.00000000    
   0.00000000    
   0.00000000    
   0.00000000    
   0.00000000    
   0.00000000    
   0.00000000    
   0.00000000    
   0.00000000    
   0.00000000    
   0.00000000    
   0.00000000    
   0.00000000    
   0.00000000    
   0.00000000    
   0.00000000    
   0.00000000    
   0.00000000    
   0.00000000    
   0.00000000    
   0.00000000    
   0.00000000    
   0.00000000    
   0.00000000    
   0.00000000    
   0.00000000    
   0.00000000    
   0.00000000    
   0.00000000    
   0.00000000    
   0.00000000    
   1.00000000    
   0.00000000    
   0.00000000    
   3.00000000    
   0.00000000    
   0.00000000    
   0.00000000    
   0.00000000    
   1.00000000    
   2.00000000    
   0.00000000    
   1.00000000    
   0.00000000    
   0.00000000    
   1.00000000    
   0.00000000    
   2.00000000    
   1.00000000    
   1.00000000    
   0.00000000    
   0.00000000    
   1.00000000    
   2.00000000    
   0.00000000    
   0.00000000    
   0.00000000    
   0.00000000    
   0.00000000    
   0.00000000    
   0.00000000    
   0.00000000    
   0.00000000    
   0.00000000    
   0.00000000    
   0.00000000    
   0.00000000    
   0.00000000    
   0.00000000    
   0.00000000    
   0.00000000    
   0.00000000    
   0.00000000    
   0.00000000    
   0.00000000    
   0.00000000    
   0.00000000    
   0.00000000    
   0.00000000    
   0.00000000    
   0.00000000    
   0.00000000    
   0.00000000    
   0.00000000    
   0.00000000    
   0.00000000    
   0.00000000    
   0.00000000    
   0.00000000    
   0.00000000    
   0.00000000    
   0.00000000    
   0.00000000    
   0.00000000    
   0.00000000    
   1.00000000    
   1.00000000    
   3.00000000    
   0.00000000    
   0.00000000    
   1.00000000    
   0.00000000    
   0.00000000    
   0.00000000    
   0.00000000    
   3.00000000    
   1.00000000    
   0.00000000    
   0.00000000    
   1.00000000    
   4.00000000    
   1.00000000    
   1.00000000    
   1.00000000    
   1.00000000    
   1.00000000    
   1.00000000    
   0.00000000    
   1.00000000    
   0.00000000    
   0.00000000    
   0.00000000    
   0.00000000    
   0.00000000    
   0.00000000    
   0.00000000    
   0.00000000    
   0.00000000    
   0.00000000    
   0.00000000    
   0.00000000    
   0.00000000    
   0.00000000    
   0.00000000    
   0.00000000    
   0.00000000    
   0.00000000    
   0.00000000    
   0.00000000    
   0.00000000    
   0.00000000    
   0.00000000    
   0.00000000    
   0.00000000    
   0.00000000    
   0.00000000    
   0.00000000    
   0.00000000    
   0.00000000    
   0.00000000    
   0.00000000    
   0.00000000    
   0.00000000    
   0.00000000    
   0.00000000    
   0.00000000    
   0.00000000    
   0.00000000    
   0.00000000    
   1.00000000    
   1.00000000    
   0.00000000    
   1.00000000    
   0.00000000    
   0.00000000    
   3.00000000    
   0.00000000    
   0.00000000    
   3.00000000    
   0.00000000    
   0.00000000    
   1.00000000    
   1.00000000    
   2.00000000    
   1.00000000    
   0.00000000    
   1.00000000    
   0.00000000    
   1.00000000    
   0.00000000    
   0.00000000    
   1.00000000    
   0.00000000    
   0.00000000    
   0.00000000    
   0.00000000    
   0.00000000    
   0.00000000    
   0.00000000    
   0.00000000    
   0.00000000    
   0.00000000    
   0.00000000    
   0.00000000    
   0.00000000    
   0.00000000    
   0.00000000    
   0.00000000    
   0.00000000    
   0.00000000    
   0.00000000    
   0.00000000    
   0.00000000    
   0.00000000    
   0.00000000    
   0.00000000    
   0.00000000    
   0.00000000    
   0.00000000    
   0.00000000    
   0.00000000    
   0.00000000    
   0.00000000    
   0.00000000    
   0.00000000    
   0.00000000    
   0.00000000    
   0.00000000    
   0.00000000    
   0.00000000    
   0.00000000    
   0.00000000    
   0.00000000    
   0.00000000    
   0.00000000    
   1.00000000    
   1.00000000    
   0.00000000    
   0.00000000    
   2.00000000    
   0.00000000    
   4.00000000    
   1.00000000    
   1.00000000    
   2.00000000    
   1.00000000    
   1.00000000    
   0.00000000    
   2.00000000    
   0.00000000    
   0.00000000    
   1.00000000    
   1.00000000    
   1.00000000    
   0.00000000    
   0.00000000    
   0.00000000    
   0.00000000    
   0.00000000    
   0.00000000    
   0.00000000    
   0.00000000    
   0.00000000    
   0.00000000    
   0.00000000    
   0.00000000    
   0.00000000    
   0.00000000    
   0.00000000    
   0.00000000    
   0.00000000    
   0.00000000    
   0.00000000    
   0.00000000    
   0.00000000    
   0.00000000    
   0.00000000    
   0.00000000    
   0.00000000    
   0.00000000    
   0.00000000    
   0.00000000    
   0.00000000    
   0.00000000    
   0.00000000    
   0.00000000    
   0.00000000    
   0.00000000    
   0.00000000    
   0.00000000    
   0.00000000    
   0.00000000    
   0.00000000    
   0.00000000    
   0.00000000    
   0.00000000    
   0.00000000    
   2.00000000    
   0.00000000    
   0.00000000    
   1.00000000    
   2.00000000    
   1.00000000    
   2.00000000    
   5.00000000    
   3.00000000    
   1.00000000    
   2.00000000    
   1.00000000    
   1.00000000    
   1.00000000    
   0.00000000    
   0.00000000    
   0.00000000    
   0.00000000    
   3.00000000    
   2.00000000    
   1.00000000    
   1.00000000    
   1.00000000    
   0.00000000    
   0.00000000    
   0.00000000    
   0.00000000    
   0.00000000    
   0.00000000    
   0.00000000    
   0.00000000    
   0.00000000    
   0.00000000    
   0.00000000    
   0.00000000    
   0.00000000    
   0.00000000    
   0.00000000    
   0.00000000    
   0.00000000    
   0.00000000    
   0.00000000    
   0.00000000    
   0.00000000    
   0.00000000    
   0.00000000    
   0.00000000    
   0.00000000    
   0.00000000    
   0.00000000    
   0.00000000    
   0.00000000    
   0.00000000    
   0.00000000    
   0.00000000    
   0.00000000    
   0.00000000    
   0.00000000    
   0.00000000    
   0.00000000    
   0.00000000    
   0.00000000    
   0.00000000    
   0.00000000    
   0.00000000    
   1.00000000    
   0.00000000    
   1.00000000    
   1.00000000    
   1.00000000    
   2.00000000    
   3.00000000    
   1.00000000    
   2.00000000    
   1.00000000    
   5.00000000    
   4.00000000    
   1.00000000    
   3.00000000    
   0.00000000    
   3.00000000    
   0.00000000    
   1.00000000    
   1.00000000    
   0.00000000    
   0.00000000    
   0.00000000    
   0.00000000    
   0.00000000    
   0.00000000    
   0.00000000    
   0.00000000    
   0.00000000    
   0.00000000    
   0.00000000    
   0.00000000    
   0.00000000    
   0.00000000    
   0.00000000    
   0.00000000    
   0.00000000    
   0.00000000    
   0.00000000    
   0.00000000    
   0.00000000    
   0.00000000    
   0.00000000    
   0.00000000    
   0.00000000    
   0.00000000    
   0.00000000    
   0.00000000    
   0.00000000    
   0.00000000    
   0.00000000    
   0.00000000    
   0.00000000    
   0.00000000    
   0.00000000    
   0.00000000    
   0.00000000    
   0.00000000    
   0.00000000    
   0.00000000    
   0.00000000    
   0.00000000    
   0.00000000    
   0.00000000    
   0.00000000    
   0.00000000    
   0.00000000    
   3.00000000    
   1.00000000    
   1.00000000    
   3.00000000    
   3.00000000    
   3.00000000    
   3.00000000    
   3.00000000    
   2.00000000    
   5.00000000    
   1.00000000    
   2.00000000    
   2.00000000    
   0.00000000    
   1.00000000    
   1.00000000    
   1.00000000    
   1.00000000    
   0.00000000    
   0.00000000    
   0.00000000    
   0.00000000    
   0.00000000    
   0.00000000    
   0.00000000    
   0.00000000    
   0.00000000    
   0.00000000    
   0.00000000    
   0.00000000    
   0.00000000    
   0.00000000    
   0.00000000    
   0.00000000    
   0.00000000    
   0.00000000    
   0.00000000    
   0.00000000    
   0.00000000    
   0.00000000    
   0.00000000    
   0.00000000    
   0.00000000    
   0.00000000    
   0.00000000    
   0.00000000    
   0.00000000    
   0.00000000    
   0.00000000    
   0.00000000    
   0.00000000    
   0.00000000    
   0.00000000    
   0.00000000    
   0.00000000    
   0.00000000    
   0.00000000    
   0.00000000    
   0.00000000    
   0.00000000    
   0.00000000    
   0.00000000    
   0.00000000    
   0.00000000    
   1.00000000    
   3.00000000    
   3.00000000    
   0.00000000    
   3.00000000    
   2.00000000    
   4.00000000    
   1.00000000    
   2.00000000    
   5.00000000    
   7.00000000    
   2.00000000    
   2.00000000    
   1.00000000    
   0.00000000    
   0.00000000    
   0.00000000    
   1.00000000    
   0.00000000    
   0.00000000    
   0.00000000    
   0.00000000    
   0.00000000    
   0.00000000    
   0.00000000    
   0.00000000    
   0.00000000    
   0.00000000    
   0.00000000    
   0.00000000    
   0.00000000    
   0.00000000    
   0.00000000    
   0.00000000    
   0.00000000    
   0.00000000    
   0.00000000    
   0.00000000    
   0.00000000    
   0.00000000    
   0.00000000    
   0.00000000    
   0.00000000    
   0.00000000    
   0.00000000    
   0.00000000    
   0.00000000    
   0.00000000    
   0.00000000    
   0.00000000    
   0.00000000    
   0.00000000    
   0.00000000    
   0.00000000    
   0.00000000    
   0.00000000    
   0.00000000    
   0.00000000    
   0.00000000    
   0.00000000    
   0.00000000    
   0.00000000    
   0.00000000    
   0.00000000    
   0.00000000    
   0.00000000    
   1.00000000    
   1.00000000    
   0.00000000    
   1.00000000    
   1.00000000    
   6.00000000    
   0.00000000    
   0.00000000    
   5.00000000    
   4.00000000    
   0.00000000    
   1.00000000    
   0.00000000    
   0.00000000    
   0.00000000    
   0.00000000    
   0.00000000    
   0.00000000    
   0.00000000    
   0.00000000    
   0.00000000    
   0.00000000    
   0.00000000    
   0.00000000    
   0.00000000    
   0.00000000    
   0.00000000    
   0.00000000    
   0.00000000    
   0.00000000    
   0.00000000    
   0.00000000    
   0.00000000    
   0.00000000    
   0.00000000    
   0.00000000    
   0.00000000    
   0.00000000    
   0.00000000    
   0.00000000    
   0.00000000    
   0.00000000    
   0.00000000    
   0.00000000    
   0.00000000    
   0.00000000    
   0.00000000    
   0.00000000    
   0.00000000    
   0.00000000    
   0.00000000    
   0.00000000    
   0.00000000    
   0.00000000    
   0.00000000    
   0.00000000    
   0.00000000    
   0.00000000    
   0.00000000    
   0.00000000    
   0.00000000    
   0.00000000    
   0.00000000    
   0.00000000    
   0.00000000    
   0.00000000    
   1.00000000    
   0.00000000    
   1.00000000    
   1.00000000    
   3.00000000    
   1.00000000    
   0.00000000    
   2.00000000    
   0.00000000    
   1.00000000    
   0.00000000    
   0.00000000    
   0.00000000    
   0.00000000    
   0.00000000    
   0.00000000    
   0.00000000    
   0.00000000    
   0.00000000    
   0.00000000    
   0.00000000    
   0.00000000    
   0.00000000    
   0.00000000    
   0.00000000    
   0.00000000    
   0.00000000    
   0.00000000    
   0.00000000    
   0.00000000    
   0.00000000    
   0.00000000    
   0.00000000    
   0.00000000    
   0.00000000    
   0.00000000    
   0.00000000    
   0.00000000    
   0.00000000    
   0.00000000    
   0.00000000    
   0.00000000    
   0.00000000    
   0.00000000    
   0.00000000    
   0.00000000    
   0.00000000    
   0.00000000    
   0.00000000    
   0.00000000    
   0.00000000    
   0.00000000    
   0.00000000    
   0.00000000    
   0.00000000    
   0.00000000    
   0.00000000    
   0.00000000    
   0.00000000    
   0.00000000    
   0.00000000    
   0.00000000    
   0.00000000    
   0.00000000    
   0.00000000    
   0.00000000    
   0.00000000    
   0.00000000    
   0.00000000    
   0.00000000    
   0.00000000    
   0.00000000    
   0.00000000    
   0.00000000    
   0.00000000    
   0.00000000    
   0.00000000    
   0.00000000    
   0.00000000    
   0.00000000    
   0.00000000    
   0.00000000    
   0.00000000    
   0.00000000    
   0.00000000    
   0.00000000    
   0.00000000    
   0.00000000    
   0.00000000    
   0.00000000    
   0.00000000    
   0.00000000    
   0.00000000    
   0.00000000    
   0.00000000    
   0.00000000    
   0.00000000    
   0.00000000    
   0.00000000    
   0.00000000    
   0.00000000    
   0.00000000    
   0.00000000    
   0.00000000    
   0.00000000    
   0.00000000    
   0.00000000    
   0.00000000    
   0.00000000    
   0.00000000    
   0.00000000    
   0.00000000    
   0.00000000    
   0.00000000    
   0.00000000    
   0.00000000    
   0.00000000    
   0.00000000    
   0.00000000    
   0.00000000    
   0.00000000    
   0.00000000    
   0.00000000    
   0.00000000    
   0.00000000    
   0.00000000    
   0.00000000    
   0.00000000    
   0.00000000    
   0.00000000    
   0.00000000    
   0.00000000    
   0.00000000    
   0.00000000    
   0.00000000    
   0.00000000    
   0.00000000    
   0.00000000    
   0.00000000    
   0.00000000    
   0.00000000    
   0.00000000    
   0.00000000    
   0.00000000    
   0.00000000    
   0.00000000    
   0.00000000    
   0.00000000    
   0.00000000    
   0.00000000    
   0.00000000    
   0.00000000    
   0.00000000    
   0.00000000    
   0.00000000    
   0.00000000    
   0.00000000    
   0.00000000    
   0.00000000    
   0.00000000    
   0.00000000    
   0.00000000    
   0.00000000    
   0.00000000    
   0.00000000    
   0.00000000    
   0.00000000    
   0.00000000    
   0.00000000    
   0.00000000    
   0.00000000    
   0.00000000    
   0.00000000    
   0.00000000    
   0.00000000    
   0.00000000    
   0.00000000    
   0.00000000    
   0.00000000    
   0.00000000    
   0.00000000    
   0.00000000    
   0.00000000    
   0.00000000    
   0.00000000    
   0.00000000    
   0.00000000    
   0.00000000    
   0.00000000    
   0.00000000    
   0.00000000    
   0.00000000    
   0.00000000    
   0.00000000    
   0.00000000    
   0.00000000    
   0.00000000    
   0.00000000    
   0.00000000    
   0.00000000    
   0.00000000    
   0.00000000    
   0.00000000    
   0.00000000    
   0.00000000    
   0.00000000    
   0.00000000    
   0.00000000    
   0.00000000    
   0.00000000    
   0.00000000    
   0.00000000    
   0.00000000    
   0.00000000    
   0.00000000    
   0.00000000    
   0.00000000    
   0.00000000    
   0.00000000    
   0.00000000    
   0.00000000    
   0.00000000    
   0.00000000    
   0.00000000    
   0.00000000    
   0.00000000    
   0.00000000    
   0.00000000    
   0.00000000    
   0.00000000    
   0.00000000    
   0.00000000    
   0.00000000    
   0.00000000    
   0.00000000    
   0.00000000    
   0.00000000    
   0.00000000    
   0.00000000    
   0.00000000    
   0.00000000    
   0.00000000    
   0.00000000    
   0.00000000    
   0.00000000    
   0.00000000    
   0.00000000    
   0.00000000    
   0.00000000    
   0.00000000    
   0.00000000    
   0.00000000    
   0.00000000    
   0.00000000    
   0.00000000    
   0.00000000    
   0.00000000    
   0.00000000    
   0.00000000    
   0.00000000    
   0.00000000    
   0.00000000    
   0.00000000    
   0.00000000    
   0.00000000    
   0.00000000    
   0.00000000    
   0.00000000    
   0.00000000    
   0.00000000    
   0.00000000    
   0.00000000    
   0.00000000    
   0.00000000    
   0.00000000    
   0.00000000    
   0.00000000    
   0.00000000    
   0.00000000    
   0.00000000    
   0.00000000    
   0.00000000    
   0.00000000    
   0.00000000    
   0.00000000    
   0.00000000    
   0.00000000    
   0.00000000    
   0.00000000    
   0.00000000    
   0.00000000    
   0.00000000    
   0.00000000    
   0.00000000    
   0.00000000    
   0.00000000    
   0.00000000    
   0.00000000    
   0.00000000    
   0.00000000    
   0.00000000    
   0.00000000    
   0.00000000    
   0.00000000    
   0.00000000    
   0.00000000    
   0.00000000    
   0.00000000    
   0.00000000    
   0.00000000    
   0.00000000    
   0.00000000    
   0.00000000    
   0.00000000    
   0.00000000    
   0.00000000    
   0.00000000    
   0.00000000    
   0.00000000    
   0.00000000    
   0.00000000    
   0.00000000    
   0.00000000    
   0.00000000    
   0.00000000    
   0.00000000    
   0.00000000    
   0.00000000    
   0.00000000    
   0.00000000    
   0.00000000    
   0.00000000    
   0.00000000    
   0.00000000    
   0.00000000    
   0.00000000    
   0.00000000    
   0.00000000    
   0.00000000    
   0.00000000    
   0.00000000    
   0.00000000    
   0.00000000    
   0.00000000    
   0.00000000    
   0.00000000    
   0.00000000    
   0.00000000    
   0.00000000    
   0.00000000    
   0.00000000    
   0.00000000    
   0.00000000    
   0.00000000    
   0.00000000    
   0.00000000    
   0.00000000    
   0.00000000    
   0.00000000    
   0.00000000    
   0.00000000    
   0.00000000    
   0.00000000    
   0.00000000    
   0.00000000    
   0.00000000    
   0.00000000    
   0.00000000    
   0.00000000    
   0.00000000    
   0.00000000    
   0.00000000    
   0.00000000    
   0.00000000    
   0.00000000    
   0.00000000    
   0.00000000    
   0.00000000    
   0.00000000    
   0.00000000    
   0.00000000    
   0.00000000    
   0.00000000    
   0.00000000    
   0.00000000    
   0.00000000    
   0.00000000    
   0.00000000    
   0.00000000    
   0.00000000    
   0.00000000    
   0.00000000    
   0.00000000    
   0.00000000    
   0.00000000    
   0.00000000    
   0.00000000    
   0.00000000    
   0.00000000    
   0.00000000    
   0.00000000    
   0.00000000    
   0.00000000    
   0.00000000    
   0.00000000    
   0.00000000    
   0.00000000    
   0.00000000    
   0.00000000    
   0.00000000    
   0.00000000    
   0.00000000    
   0.00000000    
   0.00000000    
   0.00000000    
   0.00000000    
   0.00000000    
   0.00000000    
   0.00000000    
   0.00000000    
   0.00000000    
   0.00000000    
   0.00000000    
   0.00000000    
   0.00000000    
   0.00000000    
   0.00000000    
   0.00000000    
   0.00000000    
   0.00000000    
   0.00000000    
   0.00000000    
   0.00000000    
   0.00000000    
   0.00000000    
   0.00000000    
   0.00000000    
   0.00000000    
   0.00000000    
   0.00000000    
   0.00000000    
   0.00000000    
   0.00000000    
   0.00000000    
   0.00000000    
   0.00000000    
   0.00000000    
   0.00000000    
   0.00000000    
   0.00000000    
   0.00000000    
   0.00000000    
   0.00000000    
   0.00000000    
   0.00000000    
   0.00000000    
   0.00000000    
   0.00000000    
   0.00000000    
   0.00000000    
   0.00000000    
   0.00000000    
   0.00000000    
   0.00000000    
   0.00000000    
   0.00000000    
   0.00000000    
   0.00000000    
   0.00000000    
   0.00000000    
   0.00000000    
   0.00000000    
   0.00000000    
   0.00000000    
   0.00000000    
   0.00000000    
   0.00000000    
   0.00000000    
   0.00000000    
   0.00000000    
   0.00000000    
   0.00000000    
   0.00000000    
   0.00000000    
   0.00000000    
   0.00000000    
   0.00000000    
   0.00000000    
   0.00000000    
   0.00000000    
   0.00000000    
   0.00000000    
   0.00000000    
   0.00000000    
   0.00000000    
   0.00000000    
   0.00000000    
   0.00000000    
   0.00000000    
   0.00000000    
   0.00000000    
   0.00000000    
   0.00000000    
   0.00000000    
   0.00000000    
   0.00000000    
   0.00000000    
   0.00000000    
   0.00000000    
   0.00000000    
   0.00000000    
   0.00000000    
   0.00000000    
   0.00000000    
   0.00000000    
   0.00000000    
   0.00000000    
   0.00000000    
   0.00000000    
   0.00000000    
   0.00000000    
   0.00000000    
   0.00000000    
   0.00000000    
   0.00000000    
   0.00000000    
   0.00000000    
   0.00000000    
   0.00000000    
   0.00000000    
   0.00000000    
   0.00000000    
   0.00000000    
   0.00000000    
   0.00000000    
   0.00000000    
   0.00000000    
   0.00000000    
   0.00000000    
   0.00000000    
   0.00000000    
   0.00000000    
   0.00000000    
   0.00000000    
   0.00000000    
   0.00000000    
   0.00000000    
   0.00000000    
   0.00000000    
   0.00000000    
   0.00000000    
   0.00000000    
   0.00000000    
   0.00000000    
   0.00000000    
   0.00000000    
   0.00000000    
   0.00000000    
   0.00000000    
   0.00000000    
   0.00000000    
   0.00000000    
   0.00000000    
   0.00000000    
   0.00000000    
   0.00000000    
   0.00000000    
   0.00000000    
   0.00000000    
   0.00000000    
   0.00000000    
   0.00000000    
   0.00000000    
   0.00000000    
   0.00000000    
   0.00000000    
   0.00000000    
   0.00000000    
   0.00000000    
   0.00000000    
   0.00000000    
   0.00000000    
   0.00000000    
   0.00000000    
   0.00000000    
   0.00000000    
   0.00000000    
   0.00000000    
   0.00000000    
   0.00000000    
   0.00000000    
   0.00000000    
   0.00000000    
   0.00000000    
   0.00000000    
   0.00000000    
   0.00000000    
   0.00000000    
   0.00000000    
   0.00000000    
   0.00000000    
   0.00000000    
   0.00000000    
   0.00000000    
   0.00000000    
   0.00000000    
   0.00000000    
   0.00000000    
   0.00000000    
   0.00000000    
   0.00000000    
   0.00000000    
   0.00000000    
   0.00000000    
   0.00000000    
   0.00000000    
   0.00000000    
   0.00000000    
   0.00000000    
   0.00000000    
   0.00000000    
   0.00000000    
   0.00000000    
   0.00000000    
   0.00000000    
   0.00000000    
   0.00000000    
   0.00000000    
   0.00000000    
   0.00000000    
   0.00000000    
   0.00000000    
   0.00000000    
   0.00000000    
   0.00000000    
   0.00000000    
   0.00000000    
   0.00000000    
   0.00000000    
   0.00000000    
   0.00000000    
   0.00000000    
   0.00000000    
   0.00000000    
   0.00000000    
   0.00000000    
   0.00000000    
   0.00000000    
   0.00000000    
   0.00000000    
   0.00000000    
   0.00000000    
   0.00000000    
   0.00000000    
   0.00000000    
   0.00000000    
   0.00000000    
   0.00000000    
   0.00000000    
   0.00000000    
   0.00000000    
   0.00000000    
   0.00000000    
   0.00000000    
   0.00000000    
   0.00000000    
   0.00000000    
   0.00000000    
   0.00000000    
   0.00000000    
   0.00000000    
   0.00000000    
   0.00000000    
   0.00000000    
   0.00000000    
   0.00000000    
   0.00000000    
   0.00000000    
   0.00000000    
   0.00000000    
   0.00000000    
   0.00000000    
   0.00000000    
   0.00000000    
   0.00000000    
   0.00000000    
   0.00000000    
   0.00000000    
   0.00000000    
   0.00000000    
   0.00000000    
   0.00000000    
   0.00000000    
   0.00000000    
   0.00000000    
   0.00000000    
   0.00000000    
   0.00000000    
   0.00000000    
   0.00000000    
   0.00000000    
   0.00000000    
   0.00000000    
   0.00000000    
   0.00000000    
   0.00000000    
   0.00000000    
   0.00000000    
   0.00000000    
   0.00000000    
   0.00000000    
   0.00000000    
   0.00000000    
   0.00000000    
   0.00000000    
   0.00000000    
   0.00000000    
   0.00000000    
   0.00000000    
   0.00000000    
   0.00000000    
   0.00000000    
   0.00000000    
   0.00000000    
   0.00000000    
   0.00000000    
   0.00000000    
   0.00000000    
   0.00000000    
   0.00000000    
   0.00000000    
   0.00000000    
   0.00000000    
   0.00000000    
   0.00000000    
   0.00000000    
   0.00000000    
   0.00000000    
   0.00000000    
   0.00000000    
   0.00000000    
   0.00000000    
   0.00000000    
   0.00000000    
   0.00000000    
   0.00000000    
   0.00000000    
   0.00000000    
   0.00000000    
   0.00000000    
   0.00000000    
   0.00000000    
   0.00000000    
   0.00000000    
   0.00000000    
   0.00000000    
   0.00000000    
   0.00000000    
   0.00000000    
   0.00000000    
   0.00000000    
   0.00000000    
   0.00000000    
   0.00000000    
   0.00000000    
   0.00000000    
   0.00000000    
   0.00000000    
   0.00000000    
   0.00000000    
   0.00000000    
   0.00000000    
   0.00000000    
   0.00000000    
   0.00000000    
   0.00000000    
   0.00000000    
   0.00000000    
   0.00000000    
   0.00000000    
   0.00000000    
   0.00000000    
   0.00000000    
   0.00000000    
   0.00000000    
   0.00000000    
   0.00000000    
   0.00000000    
   0.00000000    
   0.00000000    
   0.00000000    
   0.00000000    
   0.00000000    
   0.00000000    
   0.00000000    
   0.00000000    
   0.00000000    
   0.00000000    
   0.00000000    
   0.00000000    
   0.00000000    
   0.00000000    
   0.00000000    
   0.00000000    
   0.00000000    
   0.00000000    
   0.00000000    
   0.00000000    
   0.00000000    
   0.00000000    
   0.00000000    
   0.00000000    
   0.00000000    
   0.00000000    
   0.00000000    
   0.00000000    
   0.00000000    
   0.00000000    
   0.00000000    
   0.00000000    
   0.00000000    
   0.00000000    
   0.00000000    
   0.00000000    
   0.00000000    
   0.00000000    
   0.00000000    
   0.00000000    
   0.00000000    
   0.00000000    
   0.00000000    
   0.00000000    
   0.00000000    
   0.00000000    
   0.00000000    
   0.00000000    
   0.00000000    
   0.00000000    
   0.00000000    
   0.00000000    
   0.00000000    
   0.00000000    
   0.00000000    
   0.00000000    
   0.00000000    
   0.00000000    
   0.00000000    
   0.00000000    
   0.00000000    
   0.00000000    
   0.00000000    
   0.00000000    
   0.00000000    
   0.00000000    
   0.00000000    
   0.00000000    
   0.00000000    
   0.00000000    
   0.00000000    
   0.00000000    
   0.00000000    
   0.00000000    
   0.00000000    
   0.00000000    
   0.00000000    
   0.00000000    
   0.00000000    
   0.00000000    
   0.00000000    
   0.00000000    
   0.00000000    
   0.00000000    
   0.00000000    
   0.00000000    
   0.00000000    
   0.00000000    
   0.00000000    
   0.00000000    
   0.00000000    
   0.00000000    
   0.00000000    
   0.00000000    
   0.00000000    
   0.00000000    
   0.00000000    
   0.00000000    
   0.00000000    
   0.00000000    
   0.00000000    
   0.00000000    
   0.00000000    
   0.00000000    
   0.00000000    
   0.00000000    
   0.00000000    
   0.00000000    
   0.00000000    
   0.00000000    
   0.00000000    
   0.00000000    
   0.00000000    
   0.00000000    
   0.00000000    
   0.00000000    
   0.00000000    
   0.00000000    
   0.00000000    
   0.00000000    
   0.00000000    
   0.00000000    
   0.00000000    
   0.00000000    
   0.00000000    
   0.00000000    
   0.00000000    
   0.00000000    
   0.00000000    
   0.00000000    
   0.00000000    
   0.00000000    
   0.00000000    
   0.00000000    
   0.00000000    
   0.00000000    
   0.00000000    
   0.00000000    
   0.00000000    
   0.00000000    
   0.00000000    
   0.00000000    
   0.00000000    
   0.00000000    
   0.00000000    
   0.00000000    
   0.00000000    
   0.00000000    
   0.00000000    
   0.00000000    
   0.00000000    
   0.00000000    
   0.00000000    
   0.00000000    
   0.00000000    
   0.00000000    
   0.00000000    
   0.00000000    
   0.00000000    
   0.00000000    
   0.00000000    
   0.00000000    
   0.00000000    
   0.00000000    
   0.00000000    
   0.00000000    
   0.00000000    
   0.00000000    
   0.00000000    
   0.00000000    
   0.00000000    
   0.00000000    
   0.00000000    
   0.00000000    
   0.00000000    
   0.00000000    
   0.00000000    
   0.00000000    
   0.00000000    
   0.00000000    
   0.00000000    
   0.00000000    
   0.00000000    
   0.00000000    
   0.00000000    
   0.00000000    
   0.00000000    
   0.00000000    
   0.00000000    
   0.00000000    
   0.00000000    
   0.00000000    
   0.00000000    
   0.00000000    
   0.00000000    
   0.00000000    
   0.00000000    
   0.00000000    
   0.00000000    
   0.00000000    
   0.00000000    
   0.00000000    
   0.00000000    
   0.00000000    
   0.00000000    
   0.00000000    
   0.00000000    
   0.00000000    
   0.00000000    
   0.00000000    
   0.00000000    
   0.00000000    
   0.00000000    
   0.00000000    
   0.00000000    
   0.00000000    
   0.00000000    
   0.00000000    
   0.00000000    
   0.00000000    
   0.00000000    
   0.00000000    
   0.00000000    
   0.00000000    
   0.00000000    
   0.00000000    
   0.00000000    
   0.00000000    
   0.00000000    
   0.00000000    
   0.00000000    
   0.00000000    
   0.00000000    
   0.00000000    
   0.00000000    
   0.00000000    
   0.00000000    
   0.00000000    
   0.00000000    
   0.00000000    
   0.00000000    
   0.00000000    
   0.00000000    
   0.00000000    
   0.00000000    
   0.00000000    
   0.00000000    
   0.00000000    
   0.00000000    
   0.00000000    
   0.00000000    
   0.00000000    
   0.00000000    
   0.00000000    
   0.00000000    
   0.00000000    
   0.00000000    
   0.00000000    
   0.00000000    
   0.00000000    
   0.00000000    
   0.00000000    
   0.00000000    
   0.00000000    
   0.00000000    
   0.00000000    
   0.00000000    
   0.00000000    
   0.00000000    
   0.00000000    
   0.00000000    
   0.00000000    
   0.00000000    
   0.00000000    
   0.00000000    
   0.00000000    
   0.00000000    
   0.00000000    
   0.00000000    
   0.00000000    
   0.00000000    
   0.00000000    
   0.00000000    
   0.00000000    
   0.00000000    
   0.00000000    
   0.00000000    
   0.00000000    
   0.00000000    
   0.00000000    
   0.00000000    
   0.00000000    
   0.00000000    
   0.00000000    
   0.00000000    
   0.00000000    
   0.00000000    
   0.00000000    
   0.00000000    
   0.00000000    
   0.00000000    
   0.00000000    
   0.00000000    
   0.00000000    
   0.00000000    
   0.00000000    
   0.00000000    
   0.00000000    
   0.00000000    
   0.00000000    
   0.00000000    
   0.00000000    
   0.00000000    
   0.00000000    
   0.00000000    
   0.00000000    
   0.00000000    
   0.00000000    
   0.00000000    
   0.00000000    
   0.00000000    
   0.00000000    
   0.00000000    
   0.00000000    
   0.00000000    
   0.00000000    
   0.00000000    
   0.00000000    
   0.00000000    
   0.00000000    
   0.00000000    
   0.00000000    
   0.00000000    
   0.00000000    
   0.00000000    
   0.00000000    
   0.00000000    
   0.00000000    
   0.00000000    
   0.00000000    
   0.00000000    
   0.00000000    
   0.00000000    
   0.00000000    
   0.00000000    
   0.00000000    
   0.00000000    
   0.00000000    
   0.00000000    
   0.00000000    
   0.00000000    
   0.00000000    
   0.00000000    
   0.00000000    
   0.00000000    
   0.00000000    
   0.00000000    
   0.00000000    
   0.00000000    
   0.00000000    
   0.00000000    
   0.00000000    
   0.00000000    
   0.00000000    
   0.00000000    
   0.00000000    
   0.00000000    
   0.00000000    
   0.00000000    
   0.00000000    
   0.00000000    
   0.00000000    
   0.00000000    
   0.00000000    
   0.00000000    
   0.00000000    
   0.00000000    
   0.00000000    
   0.00000000    
   0.00000000    
   0.00000000    
   0.00000000    
   0.00000000    
   0.00000000    
   0.00000000    
   0.00000000    
   0.00000000    
   0.00000000    
   0.00000000    
   0.00000000    
   0.00000000    
   0.00000000    
   0.00000000    
   0.00000000    
   0.00000000    
   0.00000000    
   0.00000000    
   0.00000000    
   0.00000000    
   0.00000000    
   0.00000000    
   0.00000000    
   0.00000000    
   0.00000000    
   0.00000000    
   0.00000000    
   0.00000000    
   0.00000000    
   0.00000000    
   0.00000000    
   0.00000000    
   0.00000000    
   0.00000000    
   0.00000000    
   0.00000000    
   0.00000000    
   0.00000000    
   0.00000000    
   0.00000000    
   0.00000000    
   0.00000000    
   0.00000000    
   0.00000000    
   0.00000000    
   0.00000000    
   0.00000000    
   0.00000000    
   0.00000000    
   0.00000000    
   0.00000000    
   0.00000000    
   0.00000000    
   0.00000000    
   0.00000000    
   0.00000000    
   0.00000000    
   0.00000000    
   0.00000000    
   0.00000000    
   0.00000000    
   0.00000000    
   0.00000000    
   0.00000000    
   0.00000000    
   0.00000000    
   0.00000000    
   0.00000000    
   0.00000000    
   0.00000000    
   0.00000000    
   0.00000000    
   0.00000000    
   0.00000000    
   0.00000000    
   0.00000000    
   0.00000000    
   0.00000000    
   0.00000000    
   0.00000000    
   0.00000000    
   0.00000000    
   0.00000000    
   0.00000000    
   0.00000000    
   0.00000000    
   0.00000000    
   0.00000000    
   0.00000000    
   0.00000000    
   0.00000000    
   0.00000000    
   0.00000000    
   0.00000000    
   0.00000000    
   0.00000000    
   0.00000000    
   0.00000000    
   0.00000000    
   0.00000000    
   0.00000000    
   0.00000000    
   0.00000000    
   0.00000000    
   0.00000000    
   0.00000000    
   0.00000000    
   0.00000000    
   0.00000000    
   0.00000000    
   0.00000000    
   0.00000000    
   0.00000000    
   0.00000000    
   0.00000000    
   0.00000000    
   0.00000000    
   0.00000000    
   0.00000000    
   0.00000000    
   0.00000000    
   0.00000000    
   0.00000000    
   0.00000000    
   0.00000000    
   0.00000000    
   0.00000000    
   0.00000000    
   0.00000000    
   0.00000000    
   0.00000000    
   0.00000000    
   0.00000000    
   0.00000000    
   0.00000000    
   0.00000000    
   0.00000000    
   0.00000000    
   0.00000000    
   0.00000000    
   0.00000000    
   0.00000000    
   0.00000000    
   0.00000000    
   0.00000000    
   0.00000000    
   0.00000000    
   0.00000000    
   0.00000000    
   0.00000000    
   0.00000000    
   0.00000000    
   0.00000000    
   0.00000000    
   0.00000000    
   0.00000000    
   0.00000000    
   0.00000000    
   0.00000000    
   0.00000000    
   0.00000000    
   0.00000000    
   0.00000000    
   0.00000000    
   0.00000000    
   0.00000000    
   0.00000000    
   0.00000000    
   0.00000000    
   0.00000000    
   0.00000000    
   0.00000000    
   0.00000000    
   0.00000000    
   0.00000000    
   0.00000000    
   0.00000000    
   0.00000000    
   0.00000000    
   0.00000000    
   0.00000000    
   0.00000000    
   0.00000000    
   0.00000000    
   0.00000000    
   0.00000000    
   0.00000000    
   0.00000000    
   0.00000000    
   0.00000000    
   0.00000000    
   0.00000000    
   0.00000000    
   0.00000000    
   0.00000000    
   0.00000000    
   0.00000000    
   0.00000000    
   0.00000000    
   0.00000000    
   0.00000000    
   0.00000000    
   0.00000000    
   0.00000000    
   0.00000000    
   0.00000000    
   0.00000000    
   0.00000000    
   0.00000000    
   0.00000000    
   0.00000000    
   0.00000000    
   0.00000000    
   0.00000000    
   0.00000000    
   0.00000000    
   0.00000000    
   0.00000000    
   0.00000000    
   0.00000000    
   0.00000000    
   0.00000000    
   0.00000000    
   0.00000000    
   0.00000000    
   0.00000000    
   0.00000000    
   0.00000000    
   0.00000000    
   0.00000000    
   0.00000000    
   0.00000000    
   0.00000000    
   0.00000000    
   0.00000000    
   0.00000000    
   0.00000000    
   0.00000000    
   0.00000000    
   0.00000000    
   0.00000000    
   0.00000000    
   0.00000000    
   0.00000000    
   0.00000000    
   0.00000000    
   0.00000000    
   0.00000000    
   0.00000000    
   0.00000000    
   0.00000000    
   0.00000000    
   0.00000000    
   0.00000000    
   0.00000000    
   0.00000000    
   0.00000000    
   0.00000000    
   0.00000000    
   0.00000000    
   0.00000000    
   0.00000000    
   0.00000000    
   0.00000000    
   0.00000000    
   0.00000000    
   0.00000000    
   0.00000000    
   0.00000000    
   0.00000000    
   0.00000000    
   0.00000000    
   0.00000000    
   0.00000000    
   0.00000000    
   0.00000000    
   0.00000000    
   0.00000000    
   0.00000000    
   0.00000000    
   0.00000000    
   0.00000000    
   0.00000000    
   0.00000000    
   0.00000000    
   0.00000000    
   0.00000000    
   0.00000000    
   0.00000000    
   0.00000000    
   0.00000000    
   0.00000000    
   0.00000000    
   0.00000000    
   0.00000000    
   0.00000000    
   0.00000000    
   0.00000000    
   0.00000000    
   0.00000000    
   0.00000000    
   0.00000000    
   0.00000000    
   0.00000000    
   0.00000000    
   0.00000000    
   0.00000000    
   0.00000000    
   0.00000000    
   0.00000000    
   0.00000000    
   0.00000000    
   0.00000000    
   0.00000000    
   0.00000000    
   0.00000000    
   0.00000000    
   0.00000000    
   0.00000000    
   0.00000000    
   0.00000000    
   0.00000000    
   0.00000000    
   0.00000000    
   0.00000000    
   0.00000000    
   0.00000000    
   0.00000000    
   0.00000000    
   0.00000000    
   0.00000000    
   0.00000000    
   0.00000000    
   0.00000000    
   0.00000000    
   0.00000000    
   0.00000000    
   0.00000000    
   0.00000000    
   0.00000000    
   0.00000000    
   0.00000000    
   0.00000000    
   0.00000000    
   0.00000000    
   0.00000000    
   0.00000000    
   0.00000000    
   0.00000000    
   0.00000000    
   0.00000000    
   0.00000000    
   0.00000000    
   0.00000000    
   0.00000000    
   0.00000000    
   0.00000000    
   0.00000000    
   0.00000000    
   0.00000000    
   0.00000000    
   0.00000000    
   0.00000000    
   0.00000000    
   0.00000000    
   0.00000000    
   0.00000000    
   0.00000000    
   0.00000000    
   0.00000000    
   0.00000000    
   0.00000000    
   0.00000000    
   0.00000000    
   0.00000000    
   0.00000000    
   0.00000000    
   0.00000000    
   0.00000000    
   0.00000000    
   0.00000000    
   0.00000000    
   0.00000000    
   0.00000000    
   0.00000000    
   0.00000000    
   0.00000000    
   0.00000000    
   0.00000000    
   0.00000000    
   0.00000000    
   0.00000000    
   0.00000000    
   0.00000000    
   0.00000000    
   0.00000000    
   0.00000000    
   0.00000000    
   0.00000000    
   0.00000000    
   0.00000000    
   0.00000000    
   0.00000000    
   0.00000000    
   0.00000000    
   0.00000000    
   0.00000000    
   0.00000000    
   0.00000000    
   0.00000000    
   0.00000000    
   0.00000000    
   0.00000000    
   0.00000000    
   0.00000000    
   0.00000000    
   0.00000000    
   0.00000000    
   0.00000000    
   0.00000000    
   0.00000000    
   0.00000000    
   0.00000000    
   0.00000000    
   0.00000000    
   0.00000000    
   0.00000000    
   0.00000000    
   0.00000000    
   0.00000000    
   0.00000000    
   0.00000000    
   0.00000000    
   0.00000000    
   0.00000000    
   0.00000000    
   0.00000000    
   0.00000000    
   0.00000000    
   0.00000000    
   0.00000000    
   0.00000000    
   0.00000000    
   0.00000000    
   0.00000000    
   0.00000000    
   0.00000000    
   0.00000000    
   0.00000000    
   0.00000000    
   0.00000000    
   0.00000000    
   0.00000000    
   0.00000000    
   0.00000000    
   0.00000000    
   0.00000000    
   0.00000000    
   0.00000000    
   0.00000000    
   0.00000000    
   0.00000000    
   0.00000000    
   0.00000000    
   0.00000000    
   0.00000000    
   0.00000000    
   0.00000000    
   0.00000000    
   0.00000000    
   0.00000000    
   0.00000000    
   0.00000000    
   0.00000000    
   0.00000000    
   0.00000000    
   0.00000000    
   0.00000000    
   0.00000000    
   0.00000000    
   0.00000000    
   0.00000000    
   0.00000000    
   0.00000000    
   0.00000000    
   0.00000000    
   0.00000000    
   0.00000000    
   0.00000000    
   0.00000000    
   0.00000000    
   0.00000000    
   0.00000000    
   0.00000000    
   0.00000000    
   0.00000000    
   0.00000000    
   0.00000000    
   0.00000000    
   0.00000000    
   0.00000000    
   0.00000000    
   0.00000000    
   0.00000000    
   0.00000000    
   0.00000000    
   0.00000000    
   0.00000000    
   0.00000000    
   0.00000000    
   0.00000000    
   0.00000000    
   0.00000000    
   0.00000000    
   0.00000000    
   0.00000000    
   0.00000000    
   0.00000000    
   0.00000000    
   0.00000000    
   0.00000000    
   0.00000000    
   0.00000000    
   0.00000000    
   0.00000000    
   0.00000000    
   0.00000000    
   0.00000000    
   0.00000000    
   0.00000000    
   0.00000000    
   0.00000000    
   0.00000000    
   0.00000000    
   0.00000000    
   0.00000000    
   0.00000000    
   0.00000000    
   0.00000000    
   0.00000000    
   0.00000000    
   0.00000000    
   0.00000000    
   0.00000000    
   0.00000000    
   0.00000000    
   0.00000000    
   0.00000000    
   0.00000000    
   0.00000000    
   0.00000000    
   0.00000000    
   0.00000000    
   0.00000000    
   0.00000000    
   0.00000000    
   0.00000000    
   0.00000000    
   0.00000000    
   0.00000000    
   0.00000000    
   0.00000000    
   0.00000000    
   0.00000000    
   0.00000000    
   0.00000000    
   0.00000000    
   0.00000000    
   0.00000000    
   0.00000000    
   0.00000000    
   0.00000000    
   0.00000000    
   0.00000000    
   0.00000000    
   0.00000000    
   0.00000000    
   0.00000000    
   0.00000000    
   0.00000000    
   0.00000000    
   0.00000000    
   0.00000000    
   0.00000000    
   0.00000000    
   0.00000000    
   0.00000000    
   0.00000000    
   0.00000000    
   0.00000000    
   0.00000000    
   0.00000000    
   0.00000000    
   0.00000000    
   0.00000000    
   0.00000000    
   0.00000000    
   0.00000000    
   0.00000000    
   0.00000000    
   0.00000000    
   0.00000000    
   0.00000000    
   0.00000000    
   0.00000000    
   0.00000000    
   0.00000000    
   0.00000000    
   0.00000000    
   0.00000000    
   0.00000000    
   0.00000000    
   0.00000000    
   0.00000000    
   0.00000000    
   0.00000000    
   0.00000000    
   0.00000000    
   0.00000000    
   0.00000000    
   0.00000000    
   0.00000000    
   0.00000000    
   0.00000000    
   0.00000000    
   0.00000000    
   0.00000000    
   0.00000000    
   0.00000000    
   0.00000000    
   0.00000000    
   0.00000000    
   0.00000000    
   0.00000000    
   0.00000000    
   0.00000000    
   0.00000000    
   0.00000000    
   0.00000000    
   0.00000000    
   0.00000000    
   0.00000000    
   0.00000000    
   0.00000000    
   0.00000000    
   0.00000000    
   0.00000000    
   0.00000000    
   0.00000000    
   0.00000000    
   0.00000000    
   0.00000000    
   0.00000000    
   0.00000000    
   0.00000000    
   0.00000000    
   0.00000000    
   0.00000000    
   0.00000000    
   0.00000000    
   0.00000000    
   0.00000000    
   0.00000000    
   0.00000000    
   0.00000000    
   0.00000000    
   0.00000000    
   0.00000000    
   0.00000000    
   0.00000000    
   0.00000000    
   0.00000000    
   0.00000000    
   0.00000000    
   0.00000000    
   0.00000000    
   0.00000000    
   0.00000000    
   0.00000000    
   0.00000000    
   0.00000000    
   0.00000000    
   0.00000000    
   0.00000000    
   0.00000000    
   0.00000000    
   0.00000000    
   0.00000000    
   0.00000000    
   0.00000000    
   0.00000000    
   0.00000000    
   0.00000000    
   0.00000000    
   0.00000000    
   0.00000000    
   0.00000000    
   0.00000000    
   0.00000000    
   0.00000000    
   0.00000000    
   0.00000000    
   0.00000000    
   0.00000000    
   0.00000000    
   0.00000000    
   0.00000000    
   0.00000000    
   0.00000000    
   0.00000000    
   0.00000000    
   0.00000000    
   0.00000000    
   0.00000000    
   0.00000000    
   0.00000000    
   0.00000000    
   0.00000000    
   0.00000000    
   0.00000000    
   0.00000000    
   0.00000000    
   0.00000000    
   0.00000000    
   0.00000000    
   0.00000000    
   0.00000000    
   0.00000000    
   0.00000000    
   0.00000000    
   0.00000000    
   0.00000000    
   0.00000000    
   0.00000000    
   0.00000000    
   0.00000000    
   0.00000000    
   0.00000000    
   0.00000000    
   0.00000000    
   0.00000000    
   0.00000000    
   0.00000000    
   0.00000000    
   0.00000000    
   0.00000000    
   0.00000000    
   0.00000000    
   0.00000000    
   0.00000000    
   0.00000000    
   0.00000000    
   0.00000000    
   0.00000000    
   0.00000000    
   0.00000000    
   0.00000000    
   0.00000000    
   0.00000000    
   0.00000000    
   0.00000000    
   0.00000000    
   0.00000000    
   0.00000000    
   0.00000000    
   0.00000000    
   0.00000000    
   0.00000000    
   0.00000000    
   0.00000000    
   0.00000000    
   0.00000000    
   0.00000000    
   0.00000000    
   0.00000000    
   0.00000000    
   0.00000000    
   0.00000000    
   0.00000000    
   0.00000000    
   0.00000000    
   0.00000000    
   0.00000000    
   0.00000000    
   0.00000000    
   0.00000000    
   0.00000000    
   0.00000000    
   0.00000000    
   0.00000000    
   0.00000000    
   0.00000000    
   0.00000000    
   0.00000000    
   0.00000000    
   0.00000000    
   0.00000000    
   0.00000000    
   0.00000000    
   0.00000000    
   0.00000000    
   0.00000000    
   0.00000000    
   0.00000000    
   0.00000000    
   0.00000000    
   0.00000000    
   0.00000000    
   0.00000000    
   0.00000000    
   0.00000000    
   0.00000000    
   0.00000000    
   0.00000000    
   0.00000000    
   0.00000000    
   0.00000000    
   0.00000000    
   0.00000000    
   0.00000000    
   0.00000000    
   0.00000000    
   0.00000000    
   0.00000000    
   0.00000000    
   0.00000000    
   0.00000000    
   0.00000000    
   0.00000000    
   0.00000000    
   0.00000000    
   0.00000000    
   0.00000000    
   0.00000000    
   0.00000000    
   0.00000000    
   0.00000000    
   0.00000000    
   0.00000000    
   0.00000000    
   0.00000000    
   0.00000000    
   0.00000000    
   0.00000000    
   0.00000000    
   0.00000000    
   0.00000000    
   0.00000000    
   0.00000000    
   0.00000000    
   0.00000000    
   0.00000000    
   0.00000000    
   0.00000000    
   0.00000000    
   0.00000000    
   0.00000000    
   0.00000000    
   0.00000000    
   0.00000000    
   0.00000000    
   0.00000000    
   0.00000000    
   0.00000000    
   0.00000000    
   0.00000000    
   0.00000000    
   0.00000000    
   0.00000000    
   0.00000000    
   0.00000000    
   0.00000000    
   0.00000000    
   0.00000000    
   0.00000000    
   0.00000000    
   0.00000000    
   0.00000000    
   0.00000000    
   0.00000000    
   0.00000000    
   0.00000000    
   0.00000000    
   0.00000000    
   0.00000000    
   0.00000000    
   0.00000000    
   0.00000000    
   0.00000000    
   0.00000000    
   0.00000000    
   0.00000000    
   0.00000000    
   0.00000000    
   0.00000000    
   0.00000000    
   0.00000000    
   0.00000000    
   0.00000000    
   0.00000000    
   0.00000000    
   0.00000000    
   0.00000000    
   0.00000000    
   0.00000000    
   0.00000000    
   0.00000000    
   0.00000000    
   0.00000000    
   0.00000000    
   0.00000000    
   0.00000000    
   0.00000000    
   0.00000000    
   0.00000000    
   0.00000000    
   0.00000000    
   0.00000000    
   0.00000000    
   0.00000000    
   0.00000000    
   0.00000000    
   0.00000000    
   0.00000000    
   0.00000000    
   0.00000000    
   0.00000000    
   0.00000000    
   0.00000000    
   0.00000000    
   0.00000000    
   0.00000000    
   0.00000000    
   0.00000000    
   0.00000000    
   0.00000000    
   0.00000000    
   0.00000000    
   0.00000000    
   0.00000000    
   0.00000000    
   0.00000000    
   0.00000000    
   0.00000000    
   0.00000000    
   0.00000000    
   0.00000000    
   0.00000000    
   0.00000000    
   0.00000000    
   0.00000000    
   0.00000000    
   0.00000000    
   0.00000000    
   0.00000000    
   0.00000000    
   0.00000000    
   0.00000000    
   0.00000000    
   0.00000000    
   0.00000000    
   0.00000000    
   0.00000000    
   0.00000000    
   0.00000000    
   0.00000000    
   0.00000000    
   0.00000000    
   0.00000000    
   0.00000000    
   0.00000000    
   0.00000000    
   0.00000000    
   0.00000000    
   0.00000000    
   0.00000000    
   0.00000000    
   0.00000000    
   0.00000000    
   0.00000000    
   0.00000000    
   0.00000000    
   0.00000000    
   0.00000000    
   0.00000000    
   0.00000000    
   0.00000000    
   0.00000000    
   0.00000000    
   0.00000000    
   0.00000000    
   0.00000000    
   0.00000000    
   0.00000000    
   0.00000000    
   0.00000000    
   0.00000000    
   0.00000000    
   0.00000000    
   0.00000000    
   0.00000000    
   0.00000000    
   0.00000000    
   0.00000000    
   0.00000000    
   0.00000000    
   0.00000000    
   0.00000000    
   0.00000000    
   0.00000000    
   0.00000000    
   0.00000000    
   0.00000000    
   0.00000000    
   0.00000000    
   0.00000000    
   0.00000000    
   0.00000000    
   0.00000000    
   0.00000000    
   0.00000000    
   0.00000000    
   0.00000000    
   0.00000000    
   0.00000000    
   0.00000000    
   0.00000000    
   0.00000000    
   0.00000000    
   0.00000000    
   0.00000000    
   0.00000000    
   0.00000000    
   0.00000000    
   0.00000000    
   0.00000000    
   0.00000000    
   0.00000000    
   0.00000000    
   0.00000000    
   0.00000000    
   0.00000000    
   0.00000000    
   0.00000000    
   0.00000000    
   0.00000000    
   0.00000000    
   0.00000000    
   0.00000000    
   0.00000000    
   0.00000000    
   0.00000000    
   0.00000000    
   0.00000000    
   0.00000000    
   0.00000000    
   0.00000000    
   0.00000000    
   0.00000000    
   0.00000000    
   0.00000000    
   0.00000000    
   0.00000000    
   0.00000000    
   0.00000000    
   0.00000000    
   0.00000000    
   0.00000000    
   0.00000000    
   0.00000000    
   0.00000000    
   0.00000000    
   0.00000000    
   0.00000000    
   0.00000000    
   1.00000000    
   0.00000000    
   0.00000000    
   0.00000000    
   0.00000000    
   0.00000000    
   0.00000000    
   0.00000000    
   0.00000000    
   0.00000000    
   0.00000000    
   0.00000000    
   0.00000000    
   0.00000000    
   0.00000000    
   0.00000000    
   0.00000000    
   0.00000000    
   0.00000000    
   0.00000000    
   0.00000000    
   0.00000000    
   0.00000000    
   0.00000000    
   0.00000000    
   0.00000000    
   0.00000000    
   0.00000000    
   0.00000000    
   0.00000000    
   0.00000000    
   0.00000000    
   0.00000000    
   0.00000000    
   0.00000000    
   0.00000000    
   0.00000000    
   0.00000000    
   0.00000000    
   0.00000000    
   0.00000000    
   0.00000000    
   0.00000000    
   0.00000000    
   0.00000000    
   0.00000000    
   0.00000000    
   0.00000000    
   0.00000000    
   0.00000000    
   0.00000000    
   0.00000000    
   0.00000000    
   0.00000000    
   0.00000000    
   0.00000000    
   0.00000000    
   0.00000000    
   0.00000000    
   0.00000000    
   0.00000000    
   0.00000000    
   0.00000000    
   0.00000000    
   0.00000000    
   0.00000000    
   2.00000000    
   1.00000000    
   0.00000000    
   0.00000000    
   0.00000000    
   0.00000000    
   0.00000000    
   0.00000000    
   0.00000000    
   0.00000000    
   0.00000000    
   0.00000000    
   0.00000000    
   0.00000000    
   0.00000000    
   0.00000000    
   0.00000000    
   0.00000000    
   0.00000000    
   0.00000000    
   0.00000000    
   0.00000000    
   0.00000000    
   0.00000000    
   0.00000000    
   0.00000000    
   0.00000000    
   0.00000000    
   0.00000000    
   0.00000000    
   0.00000000    
   0.00000000    
   0.00000000    
   0.00000000    
   0.00000000    
   0.00000000    
   0.00000000    
   0.00000000    
   0.00000000    
   0.00000000    
   0.00000000    
   0.00000000    
   0.00000000    
   0.00000000    
   0.00000000    
   0.00000000    
   0.00000000    
   0.00000000    
   0.00000000    
   0.00000000    
   0.00000000    
   0.00000000    
   0.00000000    
   0.00000000    
   0.00000000    
   0.00000000    
   0.00000000    
   0.00000000    
   0.00000000    
   0.00000000    
   0.00000000    
   0.00000000    
   0.00000000    
   0.00000000    
   1.00000000    
   0.00000000    
   0.00000000    
   1.00000000    
   2.00000000    
   0.00000000    
   0.00000000    
   0.00000000    
   0.00000000    
   0.00000000    
   0.00000000    
   0.00000000    
   0.00000000    
   0.00000000    
   0.00000000    
   0.00000000    
   0.00000000    
   0.00000000    
   0.00000000    
   0.00000000    
   0.00000000    
   0.00000000    
   0.00000000    
   0.00000000    
   0.00000000    
   0.00000000    
   0.00000000    
   0.00000000    
   0.00000000    
   0.00000000    
   0.00000000    
   0.00000000    
   0.00000000    
   0.00000000    
   0.00000000    
   0.00000000    
   0.00000000    
   0.00000000    
   0.00000000    
   0.00000000    
   0.00000000    
   0.00000000    
   0.00000000    
   0.00000000    
   0.00000000    
   0.00000000    
   0.00000000    
   0.00000000    
   0.00000000    
   0.00000000    
   0.00000000    
   0.00000000    
   0.00000000    
   0.00000000    
   0.00000000    
   0.00000000    
   0.00000000    
   0.00000000    
   0.00000000    
   0.00000000    
   0.00000000    
   0.00000000    
   0.00000000    
   1.00000000    
   3.00000000    
   1.00000000    
   3.00000000    
   1.00000000    
   0.00000000    
   0.00000000    
   0.00000000    
   1.00000000    
   1.00000000    
   0.00000000    
   0.00000000    
   0.00000000    
   0.00000000    
   0.00000000    
   0.00000000    
   0.00000000    
   0.00000000    
   0.00000000    
   0.00000000    
   0.00000000    
   0.00000000    
   0.00000000    
   0.00000000    
   0.00000000    
   0.00000000    
   0.00000000    
   0.00000000    
   0.00000000    
   0.00000000    
   0.00000000    
   0.00000000    
   0.00000000    
   0.00000000    
   0.00000000    
   0.00000000    
   0.00000000    
   0.00000000    
   0.00000000    
   0.00000000    
   0.00000000    
   0.00000000    
   0.00000000    
   0.00000000    
   0.00000000    
   0.00000000    
   0.00000000    
   0.00000000    
   0.00000000    
   0.00000000    
   0.00000000    
   0.00000000    
   0.00000000    
   0.00000000    
   0.00000000    
   0.00000000    
   0.00000000    
   1.00000000    
   0.00000000    
   1.00000000    
   0.00000000    
   1.00000000    
   0.00000000    
   0.00000000    
   3.00000000    
   0.00000000    
   2.00000000    
   0.00000000    
   0.00000000    
   1.00000000    
   0.00000000    
   1.00000000    
   0.00000000    
   1.00000000    
   1.00000000    
   0.00000000    
   0.00000000    
   0.00000000    
   0.00000000    
   0.00000000    
   0.00000000    
   0.00000000    
   0.00000000    
   0.00000000    
   0.00000000    
   0.00000000    
   0.00000000    
   0.00000000    
   0.00000000    
   0.00000000    
   0.00000000    
   0.00000000    
   0.00000000    
   0.00000000    
   0.00000000    
   0.00000000    
   0.00000000    
   0.00000000    
   0.00000000    
   0.00000000    
   0.00000000    
   0.00000000    
   0.00000000    
   0.00000000    
   0.00000000    
   0.00000000    
   0.00000000    
   0.00000000    
   0.00000000    
   0.00000000    
   0.00000000    
   0.00000000    
   0.00000000    
   0.00000000    
   0.00000000    
   0.00000000    
   0.00000000    
   0.00000000    
   0.00000000    
   0.00000000    
   1.00000000    
   1.00000000    
   1.00000000    
   1.00000000    
   1.00000000    
   0.00000000    
   2.00000000    
   0.00000000    
   2.00000000    
   0.00000000    
   0.00000000    
   2.00000000    
   0.00000000    
   1.00000000    
   1.00000000    
   1.00000000    
   0.00000000    
   1.00000000    
   0.00000000    
   0.00000000    
   0.00000000    
   0.00000000    
   0.00000000    
   0.00000000    
   0.00000000    
   0.00000000    
   0.00000000    
   0.00000000    
   0.00000000    
   0.00000000    
   0.00000000    
   0.00000000    
   0.00000000    
   0.00000000    
   0.00000000    
   0.00000000    
   0.00000000    
   0.00000000    
   0.00000000    
   0.00000000    
   0.00000000    
   0.00000000    
   0.00000000    
   0.00000000    
   0.00000000    
   0.00000000    
   0.00000000    
   0.00000000    
   0.00000000    
   0.00000000    
   0.00000000    
   0.00000000    
   0.00000000    
   0.00000000    
   0.00000000    
   0.00000000    
   0.00000000    
   0.00000000    
   0.00000000    
   0.00000000    
   0.00000000    
   0.00000000    
   0.00000000    
   0.00000000    
   0.00000000    
   0.00000000    
   0.00000000    
   2.00000000    
   1.00000000    
   1.00000000    
   0.00000000    
   2.00000000    
   1.00000000    
   0.00000000    
   1.00000000    
   2.00000000    
   1.00000000    
   1.00000000    
   1.00000000    
   1.00000000    
   0.00000000    
   0.00000000    
   1.00000000    
   0.00000000    
   0.00000000    
   0.00000000    
   0.00000000    
   0.00000000    
   0.00000000    
   0.00000000    
   0.00000000    
   0.00000000    
   0.00000000    
   0.00000000    
   0.00000000    
   0.00000000    
   0.00000000    
   0.00000000    
   0.00000000    
   0.00000000    
   0.00000000    
   0.00000000    
   0.00000000    
   0.00000000    
   0.00000000    
   0.00000000    
   0.00000000    
   0.00000000    
   0.00000000    
   0.00000000    
   0.00000000    
   0.00000000    
   0.00000000    
   0.00000000    
   0.00000000    
   0.00000000    
   0.00000000    
   0.00000000    
   0.00000000    
   0.00000000    
   0.00000000    
   0.00000000    
   0.00000000    
   0.00000000    
   0.00000000    
   0.00000000    
   0.00000000    
   1.00000000    
   1.00000000    
   1.00000000    
   0.00000000    
   1.00000000    
   1.00000000    
   2.00000000    
   0.00000000    
   0.00000000    
   0.00000000    
   1.00000000    
   0.00000000    
   0.00000000    
   2.00000000    
   1.00000000    
   2.00000000    
   2.00000000    
   2.00000000    
   0.00000000    
   1.00000000    
   0.00000000    
   0.00000000    
   1.00000000    
   0.00000000    
   0.00000000    
   0.00000000    
   0.00000000    
   0.00000000    
   0.00000000    
   0.00000000    
   0.00000000    
   0.00000000    
   0.00000000    
   0.00000000    
   0.00000000    
   0.00000000    
   0.00000000    
   0.00000000    
   0.00000000    
   0.00000000    
   0.00000000    
   0.00000000    
   0.00000000    
   0.00000000    
   0.00000000    
   0.00000000    
   0.00000000    
   0.00000000    
   0.00000000    
   0.00000000    
   0.00000000    
   0.00000000    
   0.00000000    
   0.00000000    
   0.00000000    
   0.00000000    
   0.00000000    
   0.00000000    
   0.00000000    
   0.00000000    
   0.00000000    
   0.00000000    
   1.00000000    
   0.00000000    
   3.00000000    
   0.00000000    
   1.00000000    
   2.00000000    
   0.00000000    
   2.00000000    
   2.00000000    
   1.00000000    
   1.00000000    
   0.00000000    
   0.00000000    
   0.00000000    
   0.00000000    
   0.00000000    
   1.00000000    
   0.00000000    
   1.00000000    
   1.00000000    
   2.00000000    
   0.00000000    
   0.00000000    
   1.00000000    
   1.00000000    
   0.00000000    
   0.00000000    
   0.00000000    
   0.00000000    
   0.00000000    
   0.00000000    
   0.00000000    
   0.00000000    
   0.00000000    
   0.00000000    
   0.00000000    
   0.00000000    
   0.00000000    
   0.00000000    
   0.00000000    
   0.00000000    
   0.00000000    
   0.00000000    
   0.00000000    
   0.00000000    
   0.00000000    
   0.00000000    
   0.00000000    
   0.00000000    
   0.00000000    
   0.00000000    
   0.00000000    
   0.00000000    
   0.00000000    
   0.00000000    
   0.00000000    
   0.00000000    
   0.00000000    
   0.00000000    
   0.00000000    
   0.00000000    
   0.00000000    
   0.00000000    
   0.00000000    
   0.00000000    
   0.00000000    
   0.00000000    
   3.00000000    
   2.00000000    
   0.00000000    
   4.00000000    
   0.00000000    
   0.00000000    
   1.00000000    
   3.00000000    
   2.00000000    
   2.00000000    
   1.00000000    
   0.00000000    
   0.00000000    
   0.00000000    
   1.00000000    
   2.00000000    
   0.00000000    
   1.00000000    
   2.00000000    
   1.00000000    
   0.00000000    
   0.00000000    
   0.00000000    
   0.00000000    
   0.00000000    
   0.00000000    
   0.00000000    
   0.00000000    
   0.00000000    
   0.00000000    
   0.00000000    
   0.00000000    
   0.00000000    
   0.00000000    
   0.00000000    
   0.00000000    
   0.00000000    
   0.00000000    
   0.00000000    
   0.00000000    
   0.00000000    
   0.00000000    
   0.00000000    
   0.00000000    
   0.00000000    
   0.00000000    
   0.00000000    
   0.00000000    
   0.00000000    
   0.00000000    
   0.00000000    
   0.00000000    
   0.00000000    
   0.00000000    
   0.00000000    
   0.00000000    
   0.00000000    
   0.00000000    
   0.00000000    
   0.00000000    
   1.00000000    
   0.00000000    
   0.00000000    
   1.00000000    
   0.00000000    
   2.00000000    
   0.00000000    
   2.00000000    
   3.00000000    
   1.00000000    
   1.00000000    
   2.00000000    
   2.00000000    
   1.00000000    
   2.00000000    
   2.00000000    
   0.00000000    
   3.00000000    
   0.00000000    
   1.00000000    
   1.00000000    
   0.00000000    
   0.00000000    
   0.00000000    
   0.00000000    
   0.00000000    
   0.00000000    
   0.00000000    
   1.00000000    
   0.00000000    
   0.00000000    
   0.00000000    
   0.00000000    
   0.00000000    
   0.00000000    
   0.00000000    
   0.00000000    
   0.00000000    
   0.00000000    
   0.00000000    
   0.00000000    
   0.00000000    
   0.00000000    
   0.00000000    
   0.00000000    
   0.00000000    
   0.00000000    
   0.00000000    
   0.00000000    
   0.00000000    
   0.00000000    
   0.00000000    
   0.00000000    
   0.00000000    
   0.00000000    
   0.00000000    
   0.00000000    
   0.00000000    
   0.00000000    
   0.00000000    
   0.00000000    
   0.00000000    
   0.00000000    
   0.00000000    
   2.00000000    
   0.00000000    
   1.00000000    
   2.00000000    
   0.00000000    
   0.00000000    
   0.00000000    
   2.00000000    
   1.00000000    
   1.00000000    
   1.00000000    
   1.00000000    
   1.00000000    
   0.00000000    
   1.00000000    
   1.00000000    
   1.00000000    
   0.00000000    
   0.00000000    
   1.00000000    
   0.00000000    
   0.00000000    
   0.00000000    
   1.00000000    
   0.00000000    
   1.00000000    
   1.00000000    
   0.00000000    
   0.00000000    
   0.00000000    
   0.00000000    
   0.00000000    
   0.00000000    
   0.00000000    
   0.00000000    
   0.00000000    
   0.00000000    
   0.00000000    
   0.00000000    
   0.00000000    
   0.00000000    
   0.00000000    
   0.00000000    
   0.00000000    
   0.00000000    
   0.00000000    
   0.00000000    
   0.00000000    
   0.00000000    
   0.00000000    
   0.00000000    
   0.00000000    
   0.00000000    
   0.00000000    
   0.00000000    
   0.00000000    
   0.00000000    
   0.00000000    
   0.00000000    
   0.00000000    
   0.00000000    
   0.00000000    
   0.00000000    
   0.00000000    
   1.00000000    
   0.00000000    
   1.00000000    
   1.00000000    
   0.00000000    
   0.00000000    
   0.00000000    
   1.00000000    
   0.00000000    
   3.00000000    
   2.00000000    
   0.00000000    
   1.00000000    
   2.00000000    
   3.00000000    
   0.00000000    
   3.00000000    
   0.00000000    
   3.00000000    
   0.00000000    
   1.00000000    
   2.00000000    
   1.00000000    
   1.00000000    
   1.00000000    
   1.00000000    
   1.00000000    
   0.00000000    
   0.00000000    
   0.00000000    
   0.00000000    
   0.00000000    
   0.00000000    
   0.00000000    
   0.00000000    
   0.00000000    
   0.00000000    
   0.00000000    
   0.00000000    
   0.00000000    
   0.00000000    
   0.00000000    
   0.00000000    
   0.00000000    
   0.00000000    
   0.00000000    
   0.00000000    
   0.00000000    
   0.00000000    
   0.00000000    
   0.00000000    
   0.00000000    
   0.00000000    
   0.00000000    
   0.00000000    
   0.00000000    
   0.00000000    
   0.00000000    
   0.00000000    
   0.00000000    
   0.00000000    
   0.00000000    
   0.00000000    
   1.00000000    
   1.00000000    
   0.00000000    
   1.00000000    
   0.00000000    
   1.00000000    
   1.00000000    
   2.00000000    
   1.00000000    
   0.00000000    
   0.00000000    
   2.00000000    
   1.00000000    
   0.00000000    
   2.00000000    
   3.00000000    
   3.00000000    
   1.00000000    
   0.00000000    
   2.00000000    
   0.00000000    
   5.00000000    
   1.00000000    
   1.00000000    
   1.00000000    
   0.00000000    
   1.00000000    
   0.00000000    
   1.00000000    
   0.00000000    
   0.00000000    
   0.00000000    
   0.00000000    
   0.00000000    
   0.00000000    
   0.00000000    
   0.00000000    
   0.00000000    
   0.00000000    
   0.00000000    
   0.00000000    
   0.00000000    
   0.00000000    
   0.00000000    
   0.00000000    
   0.00000000    
   0.00000000    
   0.00000000    
   0.00000000    
   0.00000000    
   0.00000000    
   0.00000000    
   0.00000000    
   0.00000000    
   0.00000000    
   0.00000000    
   0.00000000    
   0.00000000    
   0.00000000    
   0.00000000    
   0.00000000    
   0.00000000    
   0.00000000    
   0.00000000    
   0.00000000    
   0.00000000    
   2.00000000    
   0.00000000    
   0.00000000    
   1.00000000    
   3.00000000    
   1.00000000    
   1.00000000    
   3.00000000    
   0.00000000    
   1.00000000    
   1.00000000    
   2.00000000    
   2.00000000    
   0.00000000    
   6.00000000    
   2.00000000    
   4.00000000    
   1.00000000    
   2.00000000    
   1.00000000    
   0.00000000    
   1.00000000    
   1.00000000    
   0.00000000    
   0.00000000    
   1.00000000    
   0.00000000    
   0.00000000    
   0.00000000    
   0.00000000    
   0.00000000    
   0.00000000    
   0.00000000    
   0.00000000    
   0.00000000    
   0.00000000    
   0.00000000    
   0.00000000    
   0.00000000    
   0.00000000    
   0.00000000    
   0.00000000    
   0.00000000    
   0.00000000    
   0.00000000    
   0.00000000    
   0.00000000    
   0.00000000    
   0.00000000    
   0.00000000    
   0.00000000    
   0.00000000    
   0.00000000    
   0.00000000    
   0.00000000    
   0.00000000    
   0.00000000    
   0.00000000    
   0.00000000    
   0.00000000    
   0.00000000    
   1.00000000    
   1.00000000    
   0.00000000    
   1.00000000    
   1.00000000    
   0.00000000    
   0.00000000    
   3.00000000    
   1.00000000    
   0.00000000    
   2.00000000    
   3.00000000    
   3.00000000    
   0.00000000    
   2.00000000    
   3.00000000    
   2.00000000    
   3.00000000    
   2.00000000    
   1.00000000    
   2.00000000    
   1.00000000    
   2.00000000    
   2.00000000    
   1.00000000    
   1.00000000    
   0.00000000    
   0.00000000    
   1.00000000    
   1.00000000    
   1.00000000    
   0.00000000    
   0.00000000    
   0.00000000    
   0.00000000    
   0.00000000    
   0.00000000    
   0.00000000    
   0.00000000    
   0.00000000    
   0.00000000    
   0.00000000    
   0.00000000    
   0.00000000    
   0.00000000    
   0.00000000    
   0.00000000    
   0.00000000    
   0.00000000    
   0.00000000    
   0.00000000    
   0.00000000    
   0.00000000    
   0.00000000    
   0.00000000    
   0.00000000    
   0.00000000    
   0.00000000    
   0.00000000    
   0.00000000    
   0.00000000    
   0.00000000    
   0.00000000    
   0.00000000    
   0.00000000    
   0.00000000    
   1.00000000    
   2.00000000    
   0.00000000    
   1.00000000    
   1.00000000    
   0.00000000    
   3.00000000    
   1.00000000    
   2.00000000    
   1.00000000    
   2.00000000    
   3.00000000    
   1.00000000    
   5.00000000    
   0.00000000    
   5.00000000    
   2.00000000    
   1.00000000    
   0.00000000    
   1.00000000    
   0.00000000    
   0.00000000    
   0.00000000    
   2.00000000    
   0.00000000    
   0.00000000    
   0.00000000    
   0.00000000    
   0.00000000    
   0.00000000    
   0.00000000    
   0.00000000    
   0.00000000    
   0.00000000    
   0.00000000    
   0.00000000    
   0.00000000    
   0.00000000    
   0.00000000    
   0.00000000    
   0.00000000    
   0.00000000    
   0.00000000    
   0.00000000    
   0.00000000    
   0.00000000    
   0.00000000    
   0.00000000    
   0.00000000    
   0.00000000    
   0.00000000    
   0.00000000    
   0.00000000    
   0.00000000    
   0.00000000    
   0.00000000    
   0.00000000    
   0.00000000    
   0.00000000    
   0.00000000    
   0.00000000    
   0.00000000    
   0.00000000    
   0.00000000    
   0.00000000    
   2.00000000    
   3.00000000    
   1.00000000    
   1.00000000    
   0.00000000    
   0.00000000    
   0.00000000    
   0.00000000    
   3.00000000    
   2.00000000    
   3.00000000    
   2.00000000    
   1.00000000    
   1.00000000    
   1.00000000    
   2.00000000    
   1.00000000    
   2.00000000    
   2.00000000    
   3.00000000    
   0.00000000    
   2.00000000    
   1.00000000    
   5.00000000    
   4.00000000    
   1.00000000    
   0.00000000    
   3.00000000    
   0.00000000    
   0.00000000    
   0.00000000    
   0.00000000    
   0.00000000    
   0.00000000    
   0.00000000    
   0.00000000    
   0.00000000    
   0.00000000    
   0.00000000    
   0.00000000    
   0.00000000    
   0.00000000    
   0.00000000    
   0.00000000    
   0.00000000    
   0.00000000    
   0.00000000    
   0.00000000    
   0.00000000    
   0.00000000    
   0.00000000    
   0.00000000    
   0.00000000    
   0.00000000    
   0.00000000    
   0.00000000    
   0.00000000    
   0.00000000    
   0.00000000    
   0.00000000    
   0.00000000    
   0.00000000    
   1.00000000    
   0.00000000    
   0.00000000    
   2.00000000    
   2.00000000    
   0.00000000    
   2.00000000    
   1.00000000    
   0.00000000    
   2.00000000    
   0.00000000    
   2.00000000    
   2.00000000    
   2.00000000    
   2.00000000    
   2.00000000    
   1.00000000    
   2.00000000    
   1.00000000    
   0.00000000    
   2.00000000    
   3.00000000    
   1.00000000    
   0.00000000    
   2.00000000    
   3.00000000    
   1.00000000    
   0.00000000    
   1.00000000    
   0.00000000    
   0.00000000    
   0.00000000    
   0.00000000    
   0.00000000    
   0.00000000    
   0.00000000    
   0.00000000    
   0.00000000    
   0.00000000    
   0.00000000    
   0.00000000    
   0.00000000    
   0.00000000    
   0.00000000    
   0.00000000    
   0.00000000    
   0.00000000    
   0.00000000    
   0.00000000    
   0.00000000    
   0.00000000    
   0.00000000    
   0.00000000    
   0.00000000    
   0.00000000    
   0.00000000    
   0.00000000    
   0.00000000    
   0.00000000    
   0.00000000    
   0.00000000    
   0.00000000    
   0.00000000    
   0.00000000    
   0.00000000    
   1.00000000    
   0.00000000    
   1.00000000    
   0.00000000    
   0.00000000    
   1.00000000    
   0.00000000    
   1.00000000    
   1.00000000    
   0.00000000    
   2.00000000    
   2.00000000    
   0.00000000    
   1.00000000    
   4.00000000    
   0.00000000    
   1.00000000    
   2.00000000    
   1.00000000    
   3.00000000    
   4.00000000    
   1.00000000    
   1.00000000    
   1.00000000    
   1.00000000    
   1.00000000    
   3.00000000    
   0.00000000    
   0.00000000    
   0.00000000    
   0.00000000    
   0.00000000    
   0.00000000    
   0.00000000    
   0.00000000    
   0.00000000    
   0.00000000    
   0.00000000    
   0.00000000    
   0.00000000    
   0.00000000    
   0.00000000    
   0.00000000    
   0.00000000    
   0.00000000    
   0.00000000    
   0.00000000    
   0.00000000    
   0.00000000    
   0.00000000    
   0.00000000    
   0.00000000    
   0.00000000    
   0.00000000    
   0.00000000    
   0.00000000    
   0.00000000    
   0.00000000    
   0.00000000    
   0.00000000    
   0.00000000    
   0.00000000    
   0.00000000    
   0.00000000    
   0.00000000    
   2.00000000    
   2.00000000    
   1.00000000    
   1.00000000    
   0.00000000    
   0.00000000    
   1.00000000    
   2.00000000    
   1.00000000    
   2.00000000    
   6.00000000    
   0.00000000    
   1.00000000    
   0.00000000    
   1.00000000    
   0.00000000    
   1.00000000    
   1.00000000    
   2.00000000    
   1.00000000    
   1.00000000    
   0.00000000    
   5.00000000    
   2.00000000    
   1.00000000    
   0.00000000    
   2.00000000    
   1.00000000    
   0.00000000    
   0.00000000    
   0.00000000    
   0.00000000    
   0.00000000    
   0.00000000    
   0.00000000    
   0.00000000    
   0.00000000    
   0.00000000    
   0.00000000    
   0.00000000    
   0.00000000    
   0.00000000    
   0.00000000    
   0.00000000    
   0.00000000    
   0.00000000    
   0.00000000    
   0.00000000    
   0.00000000    
   0.00000000    
   0.00000000    
   0.00000000    
   0.00000000    
   0.00000000    
   0.00000000    
   0.00000000    
   0.00000000    
   0.00000000    
   0.00000000    
   0.00000000    
   0.00000000    
   0.00000000    
   0.00000000    
   0.00000000    
   0.00000000    
   1.00000000    
   0.00000000    
   3.00000000    
   0.00000000    
   0.00000000    
   1.00000000    
   1.00000000    
   2.00000000    
   0.00000000    
   2.00000000    
   2.00000000    
   0.00000000    
   1.00000000    
   2.00000000    
   1.00000000    
   0.00000000    
   4.00000000    
   1.00000000    
   1.00000000    
   2.00000000    
   1.00000000    
   0.00000000    
   0.00000000    
   1.00000000    
   0.00000000    
   0.00000000    
   0.00000000    
   0.00000000    
   0.00000000    
   0.00000000    
   0.00000000    
   0.00000000    
   0.00000000    
   0.00000000    
   0.00000000    
   0.00000000    
   0.00000000    
   0.00000000    
   0.00000000    
   0.00000000    
   0.00000000    
   0.00000000    
   0.00000000    
   0.00000000    
   0.00000000    
   0.00000000    
   0.00000000    
   0.00000000    
   0.00000000    
   0.00000000    
   0.00000000    
   0.00000000    
   0.00000000    
   0.00000000    
   0.00000000    
   0.00000000    
   0.00000000    
   0.00000000    
   0.00000000    
   0.00000000    
   0.00000000    
   0.00000000    
   0.00000000    
   2.00000000    
   0.00000000    
   1.00000000    
   0.00000000    
   0.00000000    
   1.00000000    
   4.00000000    
   3.00000000    
   4.00000000    
   2.00000000    
   4.00000000    
   0.00000000    
   0.00000000    
   8.00000000    
   1.00000000    
   2.00000000    
   0.00000000    
   1.00000000    
   3.00000000    
   1.00000000    
   3.00000000    
   2.00000000    
   4.00000000    
   1.00000000    
   0.00000000    
   1.00000000    
   0.00000000    
   1.00000000    
   0.00000000    
   0.00000000    
   0.00000000    
   0.00000000    
   0.00000000    
   0.00000000    
   0.00000000    
   0.00000000    
   0.00000000    
   0.00000000    
   0.00000000    
   0.00000000    
   0.00000000    
   0.00000000    
   0.00000000    
   0.00000000    
   0.00000000    
   0.00000000    
   0.00000000    
   0.00000000    
   0.00000000    
   0.00000000    
   0.00000000    
   0.00000000    
   0.00000000    
   0.00000000    
   0.00000000    
   0.00000000    
   0.00000000    
   0.00000000    
   0.00000000    
   0.00000000    
   0.00000000    
   0.00000000    
   0.00000000    
   1.00000000    
   0.00000000    
   1.00000000    
   1.00000000    
   0.00000000    
   2.00000000    
   2.00000000    
   0.00000000    
   0.00000000    
   1.00000000    
   1.00000000    
   1.00000000    
   0.00000000    
   3.00000000    
   2.00000000    
   3.00000000    
   3.00000000    
   0.00000000    
   2.00000000    
   3.00000000    
   0.00000000    
   1.00000000    
   1.00000000    
   0.00000000    
   0.00000000    
   0.00000000    
   0.00000000    
   1.00000000    
   0.00000000    
   0.00000000    
   0.00000000    
   0.00000000    
   0.00000000    
   0.00000000    
   0.00000000    
   0.00000000    
   0.00000000    
   0.00000000    
   0.00000000    
   0.00000000    
   0.00000000    
   0.00000000    
   0.00000000    
   0.00000000    
   0.00000000    
   0.00000000    
   0.00000000    
   0.00000000    
   0.00000000    
   0.00000000    
   0.00000000    
   0.00000000    
   0.00000000    
   0.00000000    
   0.00000000    
   0.00000000    
   0.00000000    
   0.00000000    
   0.00000000    
   0.00000000    
   0.00000000    
   0.00000000    
   0.00000000    
   0.00000000    
   0.00000000    
   0.00000000    
   0.00000000    
   2.00000000    
   1.00000000    
   2.00000000    
   0.00000000    
   0.00000000    
   1.00000000    
   5.00000000    
   3.00000000    
   4.00000000    
   1.00000000    
   3.00000000    
   1.00000000    
   0.00000000    
   1.00000000    
   3.00000000    
   1.00000000    
   0.00000000    
   0.00000000    
   1.00000000    
   1.00000000    
   0.00000000    
   1.00000000    
   0.00000000    
   0.00000000    
   0.00000000    
   0.00000000    
   0.00000000    
   0.00000000    
   0.00000000    
   0.00000000    
   0.00000000    
   0.00000000    
   0.00000000    
   0.00000000    
   0.00000000    
   0.00000000    
   0.00000000    
   0.00000000    
   0.00000000    
   0.00000000    
   0.00000000    
   0.00000000    
   0.00000000    
   0.00000000    
   0.00000000    
   0.00000000    
   0.00000000    
   0.00000000    
   0.00000000    
   0.00000000    
   0.00000000    
   0.00000000    
   0.00000000    
   0.00000000    
   0.00000000    
   0.00000000    
   0.00000000    
   0.00000000    
   0.00000000    
   0.00000000    
   0.00000000    
   0.00000000    
   0.00000000    
   1.00000000    
   0.00000000    
   2.00000000    
   0.00000000    
   2.00000000    
   2.00000000    
   1.00000000    
   1.00000000    
   5.00000000    
   2.00000000    
   3.00000000    
   5.00000000    
   2.00000000    
   2.00000000    
   4.00000000    
   0.00000000    
   1.00000000    
   2.00000000    
   1.00000000    
   1.00000000    
   1.00000000    
   0.00000000    
   1.00000000    
   2.00000000    
   0.00000000    
   0.00000000    
   0.00000000    
   0.00000000    
   0.00000000    
   0.00000000    
   0.00000000    
   0.00000000    
   0.00000000    
   0.00000000    
   0.00000000    
   0.00000000    
   0.00000000    
   0.00000000    
   0.00000000    
   0.00000000    
   0.00000000    
   0.00000000    
   0.00000000    
   0.00000000    
   0.00000000    
   0.00000000    
   0.00000000    
   0.00000000    
   0.00000000    
   0.00000000    
   0.00000000    
   0.00000000    
   0.00000000    
   0.00000000    
   0.00000000    
   0.00000000    
   0.00000000    
   0.00000000    
   0.00000000    
   0.00000000    
   0.00000000    
   0.00000000    
   0.00000000    
   0.00000000    
   0.00000000    
   0.00000000    
   0.00000000    
   3.00000000    
   1.00000000    
   5.00000000    
   0.00000000    
   1.00000000    
   4.00000000    
   0.00000000    
   1.00000000    
   2.00000000    
   7.00000000    
   1.00000000    
   0.00000000    
   0.00000000    
   0.00000000    
   1.00000000    
   1.00000000    
   1.00000000    
   0.00000000    
   1.00000000    
   0.00000000    
   0.00000000    
   0.00000000    
   0.00000000    
   0.00000000    
   0.00000000    
   0.00000000    
   0.00000000    
   0.00000000    
   0.00000000    
   0.00000000    
   0.00000000    
   0.00000000    
   0.00000000    
   0.00000000    
   0.00000000    
   0.00000000    
   0.00000000    
   0.00000000    
   0.00000000    
   0.00000000    
   0.00000000    
   0.00000000    
   0.00000000    
   0.00000000    
   0.00000000    
   0.00000000    
   0.00000000    
   0.00000000    
   0.00000000    
   0.00000000    
   0.00000000    
   0.00000000    
   0.00000000    
   0.00000000    
   0.00000000    
   0.00000000    
   0.00000000    
   0.00000000    
   0.00000000    
   0.00000000    
   0.00000000    
   2.00000000    
   1.00000000    
   1.00000000    
   2.00000000    
   1.00000000    
   4.00000000    
   1.00000000    
   1.00000000    
   1.00000000    
   2.00000000    
   5.00000000    
   3.00000000    
   4.00000000    
   6.00000000    
   0.00000000    
   3.00000000    
   0.00000000    
   0.00000000    
   0.00000000    
   1.00000000    
   0.00000000    
   1.00000000    
   0.00000000    
   0.00000000    
   0.00000000    
   0.00000000    
   0.00000000    
   0.00000000    
   0.00000000    
   0.00000000    
   0.00000000    
   0.00000000    
   0.00000000    
   0.00000000    
   0.00000000    
   0.00000000    
   0.00000000    
   0.00000000    
   0.00000000    
   0.00000000    
   0.00000000    
   0.00000000    
   0.00000000    
   0.00000000    
   0.00000000    
   0.00000000    
   0.00000000    
   0.00000000    
   0.00000000    
   0.00000000    
   0.00000000    
   0.00000000    
   0.00000000    
   0.00000000    
   0.00000000    
   0.00000000    
   0.00000000    
   0.00000000    
   0.00000000    
   0.00000000    
   0.00000000    
   0.00000000    
   0.00000000    
   0.00000000    
   0.00000000    
   0.00000000    
   2.00000000    
   2.00000000    
   2.00000000    
   0.00000000    
   1.00000000    
   4.00000000    
   1.00000000    
   0.00000000    
   3.00000000    
   3.00000000    
   2.00000000    
   6.00000000    
   2.00000000    
   2.00000000    
   2.00000000    
   2.00000000    
   0.00000000    
   0.00000000    
   1.00000000    
   0.00000000    
   0.00000000    
   0.00000000    
   0.00000000    
   0.00000000    
   0.00000000    
   0.00000000    
   0.00000000    
   0.00000000    
   0.00000000    
   0.00000000    
   0.00000000    
   0.00000000    
   0.00000000    
   0.00000000    
   0.00000000    
   0.00000000    
   0.00000000    
   0.00000000    
   0.00000000    
   0.00000000    
   0.00000000    
   0.00000000    
   0.00000000    
   0.00000000    
   0.00000000    
   0.00000000    
   0.00000000    
   0.00000000    
   0.00000000    
   0.00000000    
   0.00000000    
   0.00000000    
   0.00000000    
   0.00000000    
   0.00000000    
   0.00000000    
   0.00000000    
   0.00000000    
   0.00000000    
   0.00000000    
   0.00000000    
   0.00000000    
   0.00000000    
   0.00000000    
   1.00000000    
   1.00000000    
   1.00000000    
   1.00000000    
   0.00000000    
   5.00000000    
   4.00000000    
   0.00000000    
   2.00000000    
   5.00000000    
   2.00000000    
   4.00000000    
   5.00000000    
   3.00000000    
   1.00000000    
   1.00000000    
   0.00000000    
   1.00000000    
   0.00000000    
   0.00000000    
   0.00000000    
   0.00000000    
   0.00000000    
   0.00000000    
   0.00000000    
   0.00000000    
   0.00000000    
   0.00000000    
   0.00000000    
   0.00000000    
   0.00000000    
   0.00000000    
   0.00000000    
   0.00000000    
   0.00000000    
   0.00000000    
   0.00000000    
   0.00000000    
   0.00000000    
   0.00000000    
   0.00000000    
   0.00000000    
   0.00000000    
   0.00000000    
   0.00000000    
   0.00000000    
   0.00000000    
   0.00000000    
   0.00000000    
   0.00000000    
   0.00000000    
   0.00000000    
   0.00000000    
   0.00000000    
   0.00000000    
   0.00000000    
   0.00000000    
   0.00000000    
   0.00000000    
   0.00000000    
   0.00000000    
   0.00000000    
   0.00000000    
   0.00000000    
   0.00000000    
   0.00000000    
   1.00000000    
   0.00000000    
   0.00000000    
   2.00000000    
   1.00000000    
   0.00000000    
   1.00000000    
   2.00000000    
   0.00000000    
   4.00000000    
   2.00000000    
   0.00000000    
   1.00000000    
   2.00000000    
   0.00000000    
   0.00000000    
   0.00000000    
   0.00000000    
   0.00000000    
   0.00000000    
   0.00000000    
   0.00000000    
   0.00000000    
   0.00000000    
   0.00000000    
   0.00000000    
   0.00000000    
   0.00000000    
   0.00000000    
   0.00000000    
   0.00000000    
   0.00000000    
   0.00000000    
   0.00000000    
   0.00000000    
   0.00000000    
   0.00000000    
   0.00000000    
   0.00000000    
   0.00000000    
   0.00000000    
   0.00000000    
   0.00000000    
   0.00000000    
   0.00000000    
   0.00000000    
   0.00000000    
   0.00000000    
   0.00000000    
   0.00000000    
   0.00000000    
   0.00000000    
   0.00000000    
   0.00000000    
   0.00000000    
   0.00000000    
   0.00000000    
   0.00000000    
   0.00000000    
   0.00000000    
   0.00000000    
   0.00000000    
   0.00000000    
   0.00000000    
   0.00000000    
   0.00000000    
   0.00000000    
   0.00000000    
   1.00000000    
   0.00000000    
   1.00000000    
   0.00000000    
   2.00000000    
   2.00000000    
   0.00000000    
   1.00000000    
   0.00000000    
   0.00000000    
   0.00000000    
   0.00000000    
   0.00000000    
   0.00000000    
   0.00000000    
   0.00000000    
   0.00000000    
   0.00000000    
   0.00000000    
   0.00000000    
   0.00000000    
   0.00000000    
   0.00000000    
   0.00000000    
   0.00000000    
   0.00000000    
   0.00000000    
   0.00000000    
   0.00000000    
   0.00000000    
   0.00000000    
   0.00000000    
   0.00000000    
   0.00000000    
   0.00000000    
   0.00000000    
   0.00000000    
   0.00000000    
   0.00000000    
   0.00000000    
   0.00000000    
   0.00000000    
   0.00000000    
   0.00000000    
   0.00000000    
   0.00000000    
   0.00000000    
   0.00000000    
   0.00000000    
   0.00000000    
   0.00000000    
   0.00000000    
   0.00000000    
   0.00000000    
   0.00000000    
   0.00000000    
   0.00000000    
   0.00000000    
   0.00000000    
   0.00000000    
   0.00000000    
   0.00000000    
   0.00000000    
   0.00000000    
   0.00000000    
   0.00000000    
   0.00000000    
   0.00000000    
   0.00000000    
   0.00000000    
   0.00000000    
   0.00000000    
   0.00000000    
   0.00000000    
   0.00000000    
   0.00000000    
   0.00000000    
   0.00000000    
   0.00000000    
   0.00000000    
   0.00000000    
   0.00000000    
   0.00000000    
   0.00000000    
   0.00000000    
   0.00000000    
   0.00000000    
   0.00000000    
   0.00000000    
   0.00000000    
   0.00000000    
   0.00000000    
   0.00000000    
   0.00000000    
   0.00000000    
   0.00000000    
   0.00000000    
   0.00000000    
   0.00000000    
   0.00000000    
   0.00000000    
   0.00000000    
   0.00000000    
   0.00000000    
   0.00000000    
   0.00000000    
   0.00000000    
   0.00000000    
   0.00000000    
   0.00000000    
   0.00000000    
   0.00000000    
   0.00000000    
   0.00000000    
   0.00000000    
   0.00000000    
   0.00000000    
   0.00000000    
   0.00000000    
   0.00000000    
   0.00000000    
   0.00000000    
   0.00000000    
   0.00000000    
   0.00000000    
   0.00000000    
   0.00000000    
   0.00000000    
   0.00000000    
   0.00000000    
   0.00000000    
   0.00000000    
   0.00000000    
   0.00000000    
   0.00000000    
   0.00000000    
   0.00000000    
   0.00000000    
   0.00000000    
   0.00000000    
   0.00000000    
   0.00000000    
   0.00000000    
   0.00000000    
   0.00000000    
   0.00000000    
   0.00000000    
   0.00000000    
   0.00000000    
   0.00000000    
   0.00000000    
   0.00000000    
   0.00000000    
   0.00000000    
   0.00000000    
   0.00000000    
   0.00000000    
   0.00000000    
   0.00000000    
   0.00000000    
   0.00000000    
   0.00000000    
   0.00000000    
   0.00000000    
   0.00000000    
   0.00000000    
   0.00000000    
   0.00000000    
   0.00000000    
   0.00000000    
   0.00000000    
   0.00000000    
   0.00000000    
   0.00000000    
   0.00000000    
   0.00000000    
   0.00000000    
   0.00000000    
   0.00000000    
   0.00000000    
   0.00000000    
   0.00000000    
   0.00000000    
   0.00000000    
   0.00000000    
   0.00000000    
   0.00000000    
   0.00000000    
   0.00000000    
   0.00000000    
   0.00000000    
   0.00000000    
   0.00000000    
   0.00000000    
   0.00000000    
   0.00000000    
   0.00000000    
   0.00000000    
   0.00000000    
   0.00000000    
   0.00000000    
   0.00000000    
   0.00000000    
   0.00000000    
   0.00000000    
   0.00000000    
   0.00000000    
   0.00000000    
   0.00000000    
   0.00000000    
   0.00000000    
   0.00000000    
   0.00000000    
   0.00000000    
   0.00000000    
   0.00000000    
   0.00000000    
   0.00000000    
   0.00000000    
   0.00000000    
   0.00000000    
   0.00000000    
   0.00000000    
   0.00000000    
   0.00000000    
   0.00000000    
   0.00000000    
   0.00000000    
   0.00000000    
   0.00000000    
   0.00000000    
   0.00000000    
   0.00000000    
   0.00000000    
   0.00000000    
   0.00000000    
   0.00000000    
   0.00000000    
   0.00000000    
   0.00000000    
   0.00000000    
   0.00000000    
   0.00000000    
   0.00000000    
   0.00000000    
   0.00000000    
   0.00000000    
   0.00000000    
   0.00000000    
   0.00000000    
   0.00000000    
   0.00000000    
   0.00000000    
   0.00000000    
   0.00000000    
   0.00000000    
   0.00000000    
   0.00000000    
   0.00000000    
   0.00000000    
   0.00000000    
   0.00000000    
   0.00000000    
   0.00000000    
   0.00000000    
   0.00000000    
   0.00000000    
   0.00000000    
   0.00000000    
   0.00000000    
   0.00000000    
   0.00000000    
   0.00000000    
   0.00000000    
   0.00000000    
   0.00000000    
   0.00000000    
   0.00000000    
   0.00000000    
   0.00000000    
   0.00000000    
   0.00000000    
   0.00000000    
   0.00000000    
   0.00000000    
   0.00000000    
   0.00000000    
   0.00000000    
   0.00000000    
   0.00000000    
   0.00000000    
   0.00000000    
   0.00000000    
   0.00000000    
   0.00000000    
   0.00000000    
   0.00000000    
   0.00000000    
   0.00000000    
   0.00000000    
   0.00000000    
   0.00000000    
   0.00000000    
   0.00000000    
   0.00000000    
   0.00000000    
   0.00000000    
   0.00000000    
   0.00000000    
   0.00000000    
   0.00000000    
   0.00000000    
   0.00000000    
   0.00000000    
   0.00000000    
   0.00000000    
   0.00000000    
   0.00000000    
   0.00000000    
   0.00000000    
   0.00000000    
   0.00000000    
   0.00000000    
   0.00000000    
   0.00000000    
   0.00000000    
   0.00000000    
   0.00000000    
   0.00000000    
   0.00000000    
   0.00000000    
   0.00000000    
   0.00000000    
   0.00000000    
   0.00000000    
   0.00000000    
   0.00000000    
   0.00000000    
   0.00000000    
   0.00000000    
   0.00000000    
   0.00000000    
   0.00000000    
   0.00000000    
   0.00000000    
   0.00000000    
   0.00000000    
   0.00000000    
   0.00000000    
   0.00000000    
   0.00000000    
   0.00000000    
   0.00000000    
   0.00000000    
   0.00000000    
   0.00000000    
   0.00000000    
   0.00000000    
   0.00000000    
   0.00000000    
   0.00000000    
   0.00000000    
   0.00000000    
   0.00000000    
   0.00000000    
   0.00000000    
   0.00000000    
   0.00000000    
   0.00000000    
   0.00000000    
   0.00000000    
   0.00000000    
   0.00000000    
   0.00000000    
   0.00000000    
   0.00000000    
   0.00000000    
   0.00000000    
   0.00000000    
   0.00000000    
   0.00000000    
   0.00000000    
   0.00000000    
   0.00000000    
   0.00000000    
   0.00000000    
   0.00000000    
   0.00000000    
   0.00000000    
   0.00000000    
   0.00000000    
   0.00000000    
   0.00000000    
   0.00000000    
   0.00000000    
   0.00000000    
   0.00000000    
   0.00000000    
   0.00000000    
   0.00000000    
   0.00000000    
   0.00000000    
   0.00000000    
   0.00000000    
   0.00000000    
   0.00000000    
   0.00000000    
   0.00000000    
   0.00000000    
   0.00000000    
   0.00000000    
   0.00000000    
   0.00000000    
   0.00000000    
   0.00000000    
   0.00000000    
   0.00000000    
   0.00000000    
   0.00000000    
   0.00000000    
   0.00000000    
   0.00000000    
   0.00000000    
   0.00000000    
   0.00000000    
   0.00000000    
   0.00000000    
   0.00000000    
   0.00000000    
   0.00000000    
   0.00000000    
   0.00000000    
   0.00000000    
   0.00000000    
   0.00000000    
   0.00000000    
   0.00000000    
   0.00000000    
   0.00000000    
   0.00000000    
   0.00000000    
   0.00000000    
   0.00000000    
   0.00000000    
   0.00000000    
   0.00000000    
   0.00000000    
   0.00000000    
   0.00000000    
   0.00000000    
   0.00000000    
   0.00000000    
   0.00000000    
   0.00000000    
   0.00000000    
   0.00000000    
   0.00000000    
   0.00000000    
   0.00000000    
   0.00000000    
   0.00000000    
   0.00000000    
   0.00000000    
   0.00000000    
   0.00000000    
   0.00000000    
   0.00000000    
   0.00000000    
   0.00000000    
   0.00000000    
   0.00000000    
   0.00000000    
   0.00000000    
   0.00000000    
   0.00000000    
   0.00000000    
   0.00000000    
   0.00000000    
   0.00000000    
   0.00000000    
   0.00000000    
   0.00000000    
   0.00000000    
   0.00000000    
   0.00000000    
   0.00000000    
   0.00000000    
   0.00000000    
   0.00000000    
   0.00000000    
   0.00000000    
   0.00000000    
   0.00000000    
   0.00000000    
   0.00000000    
   0.00000000    
   0.00000000    
   0.00000000    
   0.00000000    
   0.00000000    
   0.00000000    
   0.00000000    
   0.00000000    
   0.00000000    
   0.00000000    
   0.00000000    
   0.00000000    
   0.00000000    
   0.00000000    
   0.00000000    
   0.00000000    
   0.00000000    
   0.00000000    
   0.00000000    
   0.00000000    
   0.00000000    
   0.00000000    
   0.00000000    
   0.00000000    
   0.00000000    
   0.00000000    
   0.00000000    
   0.00000000    
   0.00000000    
   0.00000000    
   0.00000000    
   0.00000000    
   0.00000000    
   0.00000000    
   0.00000000    
   0.00000000    
   0.00000000    
   0.00000000    
   0.00000000    
   0.00000000    
   0.00000000    
   0.00000000    
   0.00000000    
   0.00000000    
   0.00000000    
   0.00000000    
   0.00000000    
   0.00000000    
   0.00000000    
   0.00000000    
   0.00000000    
   0.00000000    
   0.00000000    
   0.00000000    
   0.00000000    
   0.00000000    
   0.00000000    
   0.00000000    
   0.00000000    
   0.00000000    
   0.00000000    
   0.00000000    
   0.00000000    
   0.00000000    
   0.00000000    
   0.00000000    
   0.00000000    
   0.00000000    
   0.00000000    
   0.00000000    
   0.00000000    
   0.00000000    
   0.00000000    
   0.00000000    
   0.00000000    
   0.00000000    
   0.00000000    
   0.00000000    
   0.00000000    
   0.00000000    
   0.00000000    
   0.00000000    
   0.00000000    
   0.00000000    
   0.00000000    
   0.00000000    
   0.00000000    
   0.00000000    
   0.00000000    
   0.00000000    
   0.00000000    
   0.00000000    
   0.00000000    
   0.00000000    
   0.00000000    
   0.00000000    
   0.00000000    
   0.00000000    
   0.00000000    
   0.00000000    
   0.00000000    
   0.00000000    
   0.00000000    
   0.00000000    
   0.00000000    
   0.00000000    
   0.00000000    
   0.00000000    
   0.00000000    
   0.00000000    
   0.00000000    
   0.00000000    
   0.00000000    
   0.00000000    
   0.00000000    
   0.00000000    
   0.00000000    
   0.00000000    
   0.00000000    
   0.00000000    
   0.00000000    
   0.00000000    
   0.00000000    
   0.00000000    
   0.00000000    
   0.00000000    
   0.00000000    
   0.00000000    
   0.00000000    
   0.00000000    
   0.00000000    
   0.00000000    
   0.00000000    
   0.00000000    
   0.00000000    
   0.00000000    
   0.00000000    
   0.00000000    
   0.00000000    
   0.00000000    
   0.00000000    
   0.00000000    
   0.00000000    
   0.00000000    
   0.00000000    
   0.00000000    
   0.00000000    
   0.00000000    
   0.00000000    
   0.00000000    
   0.00000000    
   0.00000000    
   0.00000000    
   0.00000000    
   0.00000000    
   0.00000000    
   0.00000000    
   0.00000000    
   0.00000000    
   0.00000000    
   0.00000000    
   0.00000000    
   0.00000000    
   0.00000000    
   0.00000000    
   0.00000000    
   0.00000000    
   0.00000000    
   0.00000000    
   0.00000000    
   0.00000000    
   0.00000000    
   0.00000000    
   0.00000000    
   0.00000000    
   0.00000000    
   0.00000000    
   0.00000000    
   0.00000000    
   0.00000000    
   0.00000000    
   0.00000000    
   0.00000000    
   0.00000000    
   0.00000000    
   0.00000000    
   0.00000000    
   0.00000000    
   0.00000000    
   0.00000000    
   0.00000000    
   0.00000000    
   0.00000000    
   0.00000000    
   0.00000000    
   0.00000000    
   0.00000000    
   0.00000000    
   0.00000000    
   0.00000000    
   0.00000000    
   0.00000000    
   0.00000000    
   0.00000000    
   0.00000000    
   0.00000000    
   0.00000000    
   0.00000000    
   0.00000000    
   0.00000000    
   0.00000000    
   0.00000000    
   0.00000000    
   0.00000000    
   0.00000000    
   0.00000000    
   0.00000000    
   0.00000000    
   0.00000000    
   0.00000000    
   0.00000000    
   0.00000000    
   0.00000000    
   0.00000000    
   0.00000000    
   0.00000000    
   0.00000000    
   0.00000000    
   0.00000000    
   0.00000000    
   0.00000000    
   0.00000000    
   0.00000000    
   0.00000000    
   0.00000000    
   0.00000000    
   0.00000000    
   0.00000000    
   0.00000000    
   0.00000000    
   0.00000000    
   0.00000000    
   0.00000000    
   0.00000000    
   0.00000000    
   0.00000000    
   0.00000000    
   0.00000000    
   0.00000000    
   0.00000000    
   0.00000000    
   0.00000000    
   0.00000000    
   0.00000000    
   0.00000000    
   0.00000000    
   0.00000000    
   0.00000000    
   0.00000000    
   0.00000000    
   0.00000000    
   0.00000000    
   0.00000000    
   0.00000000    
   0.00000000    
   0.00000000    
   0.00000000    
   0.00000000    
   0.00000000    
   0.00000000    
   0.00000000    
   0.00000000    
   0.00000000    
   0.00000000    
   0.00000000    
   0.00000000    
   0.00000000    
   0.00000000    
   0.00000000    
   0.00000000    
   0.00000000    
   0.00000000    
   0.00000000    
   0.00000000    
   0.00000000    
   0.00000000    
   0.00000000    
   0.00000000    
   0.00000000    
   0.00000000    
   0.00000000    
   0.00000000    
   0.00000000    
   0.00000000    
   0.00000000    
   0.00000000    
   0.00000000    
   0.00000000    
   0.00000000    
   0.00000000    
   0.00000000    
   0.00000000    
   0.00000000    
   0.00000000    
   0.00000000    
   0.00000000    
   0.00000000    
   0.00000000    
   0.00000000    
   0.00000000    
   0.00000000    
   0.00000000    
   0.00000000    
   0.00000000    
   0.00000000    
   0.00000000    
   0.00000000    
   0.00000000    
   0.00000000    
   0.00000000    
   0.00000000    
   0.00000000    
   0.00000000    
   0.00000000    
   0.00000000    
   0.00000000    
   0.00000000    
   0.00000000    
   0.00000000    
   0.00000000    
   0.00000000    
   0.00000000    
   0.00000000    
   0.00000000    
   0.00000000    
   0.00000000    
   0.00000000    
   0.00000000    
   0.00000000    
   0.00000000    
   0.00000000    
   0.00000000    
   0.00000000    
   0.00000000    
   0.00000000    
   0.00000000    
   0.00000000    
   0.00000000    
   0.00000000    
   0.00000000    
   0.00000000    
   0.00000000    
   0.00000000    
   0.00000000    
   0.00000000    
   0.00000000    
   0.00000000    
   0.00000000    
   0.00000000    
   0.00000000    
   0.00000000    
   0.00000000    
   0.00000000    
   0.00000000    
   0.00000000    
   0.00000000    
   0.00000000    
   0.00000000    
   0.00000000    
   0.00000000    
   0.00000000    
   0.00000000    
   0.00000000    
   0.00000000    
   0.00000000    
   0.00000000    
   0.00000000    
   0.00000000    
   0.00000000    
   0.00000000    
   0.00000000    
   0.00000000    
   0.00000000    
   0.00000000    
   0.00000000    
   0.00000000    
   0.00000000    
   0.00000000    
   0.00000000    
   0.00000000    
   0.00000000    
   0.00000000    
   0.00000000    
   0.00000000    
   0.00000000    
   0.00000000    
   0.00000000    
   0.00000000    
   0.00000000    
   0.00000000    
   0.00000000    
   0.00000000    
   0.00000000    
   0.00000000    
   0.00000000    
   0.00000000    
   0.00000000    
   0.00000000    
   0.00000000    
   0.00000000    
   0.00000000    
   0.00000000    
   0.00000000    
   0.00000000    
   0.00000000    
   0.00000000    
   0.00000000    
   0.00000000    
   0.00000000    
   0.00000000    
   0.00000000    
   0.00000000    
   0.00000000    
   0.00000000    
   0.00000000    
   0.00000000    
   0.00000000    
   0.00000000    
   0.00000000    
   0.00000000    
   0.00000000    
   0.00000000    
   0.00000000    
   0.00000000    
   0.00000000    
   0.00000000    
   0.00000000    
   0.00000000    
   0.00000000    
   0.00000000    
   0.00000000    
   0.00000000    
   0.00000000    
   0.00000000    
   0.00000000    
   0.00000000    
   0.00000000    
   0.00000000    
   0.00000000    
   0.00000000    
   0.00000000    
   0.00000000    
   0.00000000    
   0.00000000    
   0.00000000    
   0.00000000    
   0.00000000    
   0.00000000    
   0.00000000    
   0.00000000    
   0.00000000    
   0.00000000    
   0.00000000    
   0.00000000    
   0.00000000    
   0.00000000    
   0.00000000    
   0.00000000    
   0.00000000    
   0.00000000    
   0.00000000    
   0.00000000    
   0.00000000    
   0.00000000    
   0.00000000    
   0.00000000    
   0.00000000    
   0.00000000    
   0.00000000    
   0.00000000    
   0.00000000    
   0.00000000    
   0.00000000    
   0.00000000    
   0.00000000    
   0.00000000    
   0.00000000    
   0.00000000    
   0.00000000    
   0.00000000    
   0.00000000    
   0.00000000    
   0.00000000    
   0.00000000    
   0.00000000    
   0.00000000    
   0.00000000    
   0.00000000    
   0.00000000    
   0.00000000    
   0.00000000    
   0.00000000    
   0.00000000    
   0.00000000    
   0.00000000    
   0.00000000    
   0.00000000    
   0.00000000    
   0.00000000    
   0.00000000    
   0.00000000    
   0.00000000    
   0.00000000    
   0.00000000    
   0.00000000    
   0.00000000    
   0.00000000    
   0.00000000    
   0.00000000    
   0.00000000    
   0.00000000    
   0.00000000    
   0.00000000    
   0.00000000    
   0.00000000    
   0.00000000    
   0.00000000    
   0.00000000    
   0.00000000    
   0.00000000    
   0.00000000    
   0.00000000    
   0.00000000    
   0.00000000    
   0.00000000    
   0.00000000    
   0.00000000    
   0.00000000    
   0.00000000    
   0.00000000    
   0.00000000    
   0.00000000    
   0.00000000    
   0.00000000    
   0.00000000    
   0.00000000    
   0.00000000    
   0.00000000    
   0.00000000    
   0.00000000    
   0.00000000    
   0.00000000    
   0.00000000    
   0.00000000    
   0.00000000    
   0.00000000    
   0.00000000    
   0.00000000    
   0.00000000    
   0.00000000    
   0.00000000    
   0.00000000    
   0.00000000    
   0.00000000    
   0.00000000    
   0.00000000    
   0.00000000    
   0.00000000    
   0.00000000    
   0.00000000    
   0.00000000    
   0.00000000    
   0.00000000    
   0.00000000    
   0.00000000    
   0.00000000    
   0.00000000    
   0.00000000    
   0.00000000    
   0.00000000    
   0.00000000    
   0.00000000    
   0.00000000    
   0.00000000    
   0.00000000    
   0.00000000    
   0.00000000    
   0.00000000    
   0.00000000    
   0.00000000    
   0.00000000    
   0.00000000    
   0.00000000    
   0.00000000    
   0.00000000    
   0.00000000    
   0.00000000    
   0.00000000    
   0.00000000    
   0.00000000    
   0.00000000    
   0.00000000    
   0.00000000    
   0.00000000    
   0.00000000    
   0.00000000    
   0.00000000    
   0.00000000    
   0.00000000    
   0.00000000    
   0.00000000    
   0.00000000    
   0.00000000    
   0.00000000    
   0.00000000    
   0.00000000    
   0.00000000    
   0.00000000    
   0.00000000    
   0.00000000    
   0.00000000    
   0.00000000    
   0.00000000    
   0.00000000    
   0.00000000    
   0.00000000    
   0.00000000    
   0.00000000    
   0.00000000    
   0.00000000    
   0.00000000    
   0.00000000    
   0.00000000    
   0.00000000    
   0.00000000    
   0.00000000    
   0.00000000    
   0.00000000    
   0.00000000    
   0.00000000    
   0.00000000    
   0.00000000    
   0.00000000    
   0.00000000    
   0.00000000    
   0.00000000    
   0.00000000    
   0.00000000    
   0.00000000    
   0.00000000    
   0.00000000    
   0.00000000    
   0.00000000    
   0.00000000    
   0.00000000    
   0.00000000    
   0.00000000    
   0.00000000    
   0.00000000    
   0.00000000    
   0.00000000    
   0.00000000    
   0.00000000    
   0.00000000    
   0.00000000    
   0.00000000    
   0.00000000    
   0.00000000    
   0.00000000    
   0.00000000    
   0.00000000    
   0.00000000    
   0.00000000    
   0.00000000    
   0.00000000    
   0.00000000    
   0.00000000    
   0.00000000    
   0.00000000    
   0.00000000    
   0.00000000    
   0.00000000    
   0.00000000    
   0.00000000    
   0.00000000    
   0.00000000    
   0.00000000    
   0.00000000    
   0.00000000    
   0.00000000    
   0.00000000    
   0.00000000    
   0.00000000    
   0.00000000    
   0.00000000    
   0.00000000    
   0.00000000    
   0.00000000    
   0.00000000    
   0.00000000    
   0.00000000    
   0.00000000    
   0.00000000    
   0.00000000    
   0.00000000    
   0.00000000    
   0.00000000    
   0.00000000    
   0.00000000    
   0.00000000    
   0.00000000    
   0.00000000    
   0.00000000    
   0.00000000    
   0.00000000    
   0.00000000    
   0.00000000    
   0.00000000    
   0.00000000    
   0.00000000    
   0.00000000    
   0.00000000    
   0.00000000    
   0.00000000    
   0.00000000    
   0.00000000    
   0.00000000    
   0.00000000    
   0.00000000    
   0.00000000    
   0.00000000    
   0.00000000    
   0.00000000    
   0.00000000    
   0.00000000    
   0.00000000    
   0.00000000    
   0.00000000    
   0.00000000    
   0.00000000    
   0.00000000    
   0.00000000    
   0.00000000    
   0.00000000    
   0.00000000    
   0.00000000    
   0.00000000    
   0.00000000    
   0.00000000    
   0.00000000    
   0.00000000    
   0.00000000    
   0.00000000    
   0.00000000    
   0.00000000    
   0.00000000    
   0.00000000    
   0.00000000    
   0.00000000    
   0.00000000    
   0.00000000    
   0.00000000    
   0.00000000    
   0.00000000    
   0.00000000    
   0.00000000    
   0.00000000    
   0.00000000    
   0.00000000    
   0.00000000    
   0.00000000    
   0.00000000    
   0.00000000    
   0.00000000    
   0.00000000    
   0.00000000    
   0.00000000    
   0.00000000    
   0.00000000    
   0.00000000    
   0.00000000    
   0.00000000    
   0.00000000    
   0.00000000    
   0.00000000    
   0.00000000    
   0.00000000    
   0.00000000    
   0.00000000    
   0.00000000    
   0.00000000    
   0.00000000    
   0.00000000    
   0.00000000    
   0.00000000    
   0.00000000    
   0.00000000    
   0.00000000    
   0.00000000    
   0.00000000    
   0.00000000    
   0.00000000    
   0.00000000    
   0.00000000    
   0.00000000    
   0.00000000    
   0.00000000    
   0.00000000    
   0.00000000    
   0.00000000    
   0.00000000    
   0.00000000    
   0.00000000    
   0.00000000    
   0.00000000    
   0.00000000    
   0.00000000    
   0.00000000    
   0.00000000    
   0.00000000    
   0.00000000    
   0.00000000    
   0.00000000    
   0.00000000    
   0.00000000    
   0.00000000    
   0.00000000    
   0.00000000    
   0.00000000    
   0.00000000    
   0.00000000    
   0.00000000    
   0.00000000    
   0.00000000    
   0.00000000    
   0.00000000    
   0.00000000    
   0.00000000    
   0.00000000    
   0.00000000    
   0.00000000    
   0.00000000    
   0.00000000    
   0.00000000    
   0.00000000    
   0.00000000    
   0.00000000    
   0.00000000    
   0.00000000    
   0.00000000    
   0.00000000    
   0.00000000    
   0.00000000    
   0.00000000    
   0.00000000    
   0.00000000    
   0.00000000    
   0.00000000    
   0.00000000    
   0.00000000    
   0.00000000    
   0.00000000    
   0.00000000    
   0.00000000    
   0.00000000    
   0.00000000    
   0.00000000    
   0.00000000    
   0.00000000    
   0.00000000    
   0.00000000    
   0.00000000    
   0.00000000    
   0.00000000    
   0.00000000    
   0.00000000    
   0.00000000    
   0.00000000    
   0.00000000    
   0.00000000    
   0.00000000    
   0.00000000    
   0.00000000    
   0.00000000    
   0.00000000    
   0.00000000    
   0.00000000    
   0.00000000    
   0.00000000    
   0.00000000    
   0.00000000    
   0.00000000    
   0.00000000    
   0.00000000    
   0.00000000    
   0.00000000    
   0.00000000    
   0.00000000    
   0.00000000    
   0.00000000    
   0.00000000    
   0.00000000    
   0.00000000    
   0.00000000    
   0.00000000    
   0.00000000    
   0.00000000    
   0.00000000    
   0.00000000    
   0.00000000    
   0.00000000    
   0.00000000    
   0.00000000    
   0.00000000    
   0.00000000    
   0.00000000    
   0.00000000    
   0.00000000    
   0.00000000    
   0.00000000    
   0.00000000    
   0.00000000    
   0.00000000    
   0.00000000    
   0.00000000    
   0.00000000    
   0.00000000    
   0.00000000    
   0.00000000    
   0.00000000    
   0.00000000    
   0.00000000    
   0.00000000    
   0.00000000    
   0.00000000    
   0.00000000    
   0.00000000    
   0.00000000    
   0.00000000    
   0.00000000    
   0.00000000    
   0.00000000    
   0.00000000    
   0.00000000    
   0.00000000    
   0.00000000    
   0.00000000    
   0.00000000    
   0.00000000    
   0.00000000    
   0.00000000    
   0.00000000    
   0.00000000    
   0.00000000    
   0.00000000    
   0.00000000    
   0.00000000    
   0.00000000    
   0.00000000    
   0.00000000    
   0.00000000    
   0.00000000    
   0.00000000    
   0.00000000    
   0.00000000    
   0.00000000    
   0.00000000    
   0.00000000    
   0.00000000    
   0.00000000    
   0.00000000    
   0.00000000    
   0.00000000    
   0.00000000    
   0.00000000    
   0.00000000    
   0.00000000    
   0.00000000    
   0.00000000    
   0.00000000    
   0.00000000    
   0.00000000    
   0.00000000    
   0.00000000    
   0.00000000    
   0.00000000    
   0.00000000    
   0.00000000    
   0.00000000    
   0.00000000    
   0.00000000    
   0.00000000    
   0.00000000    
   0.00000000    
   0.00000000    
   0.00000000    
   0.00000000    
   0.00000000    
   0.00000000    
   0.00000000    
   0.00000000    
   0.00000000    
   0.00000000    
   0.00000000    
   0.00000000    
   0.00000000    
   0.00000000    
   0.00000000    
   0.00000000    
   0.00000000    
   0.00000000    
   0.00000000    
   0.00000000    
   0.00000000    
   0.00000000    
   0.00000000    
   0.00000000    
   0.00000000    
   0.00000000    
   0.00000000    
   0.00000000    
   0.00000000    
   0.00000000    
   0.00000000    
   0.00000000    
   0.00000000    
   0.00000000    
   0.00000000    
   0.00000000    
   0.00000000    
   0.00000000    
   0.00000000    
   0.00000000    
   0.00000000    
   0.00000000    
   0.00000000    
   0.00000000    
   0.00000000    
   0.00000000    
   0.00000000    
   0.00000000    
   0.00000000    
   0.00000000    
   0.00000000    
   0.00000000    
   0.00000000    
   0.00000000    
   0.00000000    
   0.00000000    
   0.00000000    
   0.00000000    
   0.00000000    
   0.00000000    
   0.00000000    
   0.00000000    
   0.00000000    
   0.00000000    
   0.00000000    
   0.00000000    
   0.00000000    
   0.00000000    
   0.00000000    
   0.00000000    
   0.00000000    
   0.00000000    
   0.00000000    
   0.00000000    
   0.00000000    
   0.00000000    
   0.00000000    
   0.00000000    
   0.00000000    
   0.00000000    
   0.00000000    
   0.00000000    
   0.00000000    
   0.00000000    
   0.00000000    
   0.00000000    
   0.00000000    
   0.00000000    
   0.00000000    
   0.00000000    
   0.00000000    
   0.00000000    
   0.00000000    
   0.00000000    
   0.00000000    
   0.00000000    
   0.00000000    
   0.00000000    
   0.00000000    
   0.00000000    
   0.00000000    
   0.00000000    
   0.00000000    
   0.00000000    
   0.00000000    
   0.00000000    
   0.00000000    
   0.00000000    
   0.00000000    
   0.00000000    
   0.00000000    
   0.00000000    
   0.00000000    
   0.00000000    
   0.00000000    
   0.00000000    
   0.00000000    
   0.00000000    
   0.00000000    
   0.00000000    
   0.00000000    
   0.00000000    
   0.00000000    
   0.00000000    
   0.00000000    
   0.00000000    
   0.00000000    
   0.00000000    
   0.00000000    
   0.00000000    
   0.00000000    
   0.00000000    
   0.00000000    
   0.00000000    
   0.00000000    
   0.00000000    
   0.00000000    
   0.00000000    
   0.00000000    
   0.00000000    
   0.00000000    
   0.00000000    
   0.00000000    
   0.00000000    
   0.00000000    
   0.00000000    
   0.00000000    
   0.00000000    
   0.00000000    
   0.00000000    
   0.00000000    
   0.00000000    
   0.00000000    
   0.00000000    
   0.00000000    
   0.00000000    
   0.00000000    
   0.00000000    
   0.00000000    
   0.00000000    
   0.00000000    
   0.00000000    
   0.00000000    
   0.00000000    
   0.00000000    
   0.00000000    
   0.00000000    
   0.00000000    
   0.00000000    
   0.00000000    
   0.00000000    
   0.00000000    
   0.00000000    
   0.00000000    
   0.00000000    
   0.00000000    
   0.00000000    
   0.00000000    
   0.00000000    
   0.00000000    
   0.00000000    
   0.00000000    
   0.00000000    
   0.00000000    
   0.00000000    
   0.00000000    
   0.00000000    
   0.00000000    
   0.00000000    
   0.00000000    
   0.00000000    
   0.00000000    
   0.00000000    
   0.00000000    
   0.00000000    
   0.00000000    
   0.00000000    
   0.00000000    
   0.00000000    
   0.00000000    
   0.00000000    
   0.00000000    
   0.00000000    
   0.00000000    
   0.00000000    
   0.00000000    
   0.00000000    
   0.00000000    
   0.00000000    
   0.00000000    
   0.00000000    
   0.00000000    
   0.00000000    
   0.00000000    
   0.00000000    
   0.00000000    
   0.00000000    
   0.00000000    
   0.00000000    
   0.00000000    
   0.00000000    
   0.00000000    
   0.00000000    
   0.00000000    
   0.00000000    
   0.00000000    
   0.00000000    
   0.00000000    
   0.00000000    
   0.00000000    
   0.00000000    
   0.00000000    
   0.00000000    
   0.00000000    
   0.00000000    
   0.00000000    
   0.00000000    
   0.00000000    
   0.00000000    
   0.00000000    
   0.00000000    
   0.00000000    
   0.00000000    
   0.00000000    
   0.00000000    
   0.00000000    
   0.00000000    
   0.00000000    
   0.00000000    
   0.00000000    
   0.00000000    
   0.00000000    
   0.00000000    
   0.00000000    
   0.00000000    
   0.00000000    
   0.00000000    
   0.00000000    
   0.00000000    
   0.00000000    
   0.00000000    
   0.00000000    
   0.00000000    
   0.00000000    
   0.00000000    
   0.00000000    
   0.00000000    
   0.00000000    
   0.00000000    
   0.00000000    
   0.00000000    
   0.00000000    
   0.00000000    
   0.00000000    
   0.00000000    
   0.00000000    
   0.00000000    
   0.00000000    
   0.00000000    
   0.00000000    
   0.00000000    
   0.00000000    
   0.00000000    
   0.00000000    
   0.00000000    
   0.00000000    
   0.00000000    
   0.00000000    
   0.00000000    
   0.00000000    
   0.00000000    
   0.00000000    
   0.00000000    
   0.00000000    
   0.00000000    
   0.00000000    
   0.00000000    
   0.00000000    
   0.00000000    
   0.00000000    
   0.00000000    
   0.00000000    
   0.00000000    
   0.00000000    
   0.00000000    
   0.00000000    
   0.00000000    
   0.00000000    
   0.00000000    
   0.00000000    
   0.00000000    
   0.00000000    
   0.00000000    
   0.00000000    
   0.00000000    
   0.00000000    
   0.00000000    
   0.00000000    
   0.00000000    
   0.00000000    
   0.00000000    
   0.00000000    
   0.00000000    
   0.00000000    
   0.00000000    
   0.00000000    
   0.00000000    
   0.00000000    
   0.00000000    
   0.00000000    
   0.00000000    
   0.00000000    
   0.00000000    
   0.00000000    
   0.00000000    
   0.00000000    
   0.00000000    
   0.00000000    
   0.00000000    
   0.00000000    
   0.00000000    
   0.00000000    
   0.00000000    
   0.00000000    
   0.00000000    
   0.00000000    
   0.00000000    
   0.00000000    
   0.00000000    
   0.00000000    
   0.00000000    
   0.00000000    
   0.00000000    
   0.00000000    
   0.00000000    
   0.00000000    
   0.00000000    
   0.00000000    
   0.00000000    
   0.00000000    
   0.00000000    
   0.00000000    
   0.00000000    
   0.00000000    
   0.00000000    
   0.00000000    
   0.00000000    
   0.00000000    
   0.00000000    
   0.00000000    
   0.00000000    
   0.00000000    
   0.00000000    
   0.00000000    
   0.00000000    
   0.00000000    
   0.00000000    
   0.00000000    
   0.00000000    
   0.00000000    
   0.00000000    
   0.00000000    
   0.00000000    
   0.00000000    
   0.00000000    
   0.00000000    
   0.00000000    
   0.00000000    
   0.00000000    
   0.00000000    
   0.00000000    
   0.00000000    
   0.00000000    
   0.00000000    
   0.00000000    
   0.00000000    
   0.00000000    
   0.00000000    
   0.00000000    
   0.00000000    
   0.00000000    
   0.00000000    
   0.00000000    
   0.00000000    
   0.00000000    
   0.00000000    
   0.00000000    
   0.00000000    
   0.00000000    
   0.00000000    
   0.00000000    
   0.00000000    
   0.00000000    
   0.00000000    
   0.00000000    
   0.00000000    
   0.00000000    
   0.00000000    
   0.00000000    
   0.00000000    
   0.00000000    
   0.00000000    
   0.00000000    
   0.00000000    
   0.00000000    
   0.00000000    
   0.00000000    
   0.00000000    
   0.00000000    
   0.00000000    
   0.00000000    
   0.00000000    
   0.00000000    
   0.00000000    
   0.00000000    
   0.00000000    
   0.00000000    
   0.00000000    
   0.00000000    
   0.00000000    
   0.00000000    
   0.00000000    
   0.00000000    
   0.00000000    
   0.00000000    
   0.00000000    
   0.00000000    
   0.00000000    
   0.00000000    
   0.00000000    
   0.00000000    
   0.00000000    
   0.00000000    
   0.00000000    
   0.00000000    
   0.00000000    
   0.00000000    
   0.00000000    
   0.00000000    
   0.00000000    
   0.00000000    
   0.00000000    
   0.00000000    
   0.00000000    
   0.00000000    
   0.00000000    
   0.00000000    
   0.00000000    
   0.00000000    
   0.00000000    
   0.00000000    
   0.00000000    
   0.00000000    
   0.00000000    
   0.00000000    
   0.00000000    
   0.00000000    
   0.00000000    
   0.00000000    
   0.00000000    
   0.00000000    
   0.00000000    
   0.00000000    
   0.00000000    
   0.00000000    
   0.00000000    
   0.00000000    
   0.00000000    
   0.00000000    
   0.00000000    
   0.00000000    
   0.00000000    
   0.00000000    
   0.00000000    
   0.00000000    
   0.00000000    
   0.00000000    
   0.00000000    
   0.00000000    
   0.00000000    
   0.00000000    
   0.00000000    
   0.00000000    
   0.00000000    
   0.00000000    
   0.00000000    
   0.00000000    
   0.00000000    
   0.00000000    
   0.00000000    
   0.00000000    
   0.00000000    
   0.00000000    
   0.00000000    
   0.00000000    
   0.00000000    
   0.00000000    
   0.00000000    
   0.00000000    
   0.00000000    
   0.00000000    
   0.00000000    
   0.00000000    
   0.00000000    
   0.00000000    
   0.00000000    
   0.00000000    
   0.00000000    
   0.00000000    
   0.00000000    
   0.00000000    
   0.00000000    
   0.00000000    
   0.00000000    
   0.00000000    
   0.00000000    
   0.00000000    
   0.00000000    
   0.00000000    
   0.00000000    
   0.00000000    
   0.00000000    
   0.00000000    
   0.00000000    
   0.00000000    
   0.00000000    
   0.00000000    
   0.00000000    
   0.00000000    
   0.00000000    
   0.00000000    
   0.00000000    
   0.00000000    
   0.00000000    
   0.00000000    
   0.00000000    
   0.00000000    
   0.00000000    
   0.00000000    
   0.00000000    
   0.00000000    
   1.00000000    
   0.00000000    
   0.00000000    
   0.00000000    
   0.00000000    
   0.00000000    
   0.00000000    
   0.00000000    
   0.00000000    
   0.00000000    
   0.00000000    
   0.00000000    
   0.00000000    
   0.00000000    
   0.00000000    
   0.00000000    
   0.00000000    
   0.00000000    
   0.00000000    
   0.00000000    
   0.00000000    
   0.00000000    
   0.00000000    
   0.00000000    
   0.00000000    
   0.00000000    
   0.00000000    
   0.00000000    
   0.00000000    
   0.00000000    
   0.00000000    
   0.00000000    
   0.00000000    
   0.00000000    
   0.00000000    
   0.00000000    
   0.00000000    
   0.00000000    
   0.00000000    
   0.00000000    
   0.00000000    
   0.00000000    
   0.00000000    
   0.00000000    
   0.00000000    
   0.00000000    
   0.00000000    
   0.00000000    
   0.00000000    
   0.00000000    
   0.00000000    
   0.00000000    
   0.00000000    
   0.00000000    
   0.00000000    
   0.00000000    
   0.00000000    
   0.00000000    
   0.00000000    
   0.00000000    
   0.00000000    
   0.00000000    
   0.00000000    
   0.00000000    
   1.00000000    
   0.00000000    
   0.00000000    
   0.00000000    
   0.00000000    
   0.00000000    
   0.00000000    
   0.00000000    
   0.00000000    
   0.00000000    
   0.00000000    
   0.00000000    
   0.00000000    
   0.00000000    
   0.00000000    
   0.00000000    
   0.00000000    
   0.00000000    
   0.00000000    
   0.00000000    
   0.00000000    
   0.00000000    
   0.00000000    
   0.00000000    
   0.00000000    
   0.00000000    
   0.00000000    
   0.00000000    
   0.00000000    
   0.00000000    
   0.00000000    
   0.00000000    
   0.00000000    
   0.00000000    
   0.00000000    
   0.00000000    
   0.00000000    
   0.00000000    
   0.00000000    
   0.00000000    
   0.00000000    
   0.00000000    
   0.00000000    
   0.00000000    
   0.00000000    
   0.00000000    
   0.00000000    
   0.00000000    
   0.00000000    
   0.00000000    
   0.00000000    
   0.00000000    
   0.00000000    
   0.00000000    
   0.00000000    
   0.00000000    
   0.00000000    
   0.00000000    
   0.00000000    
   0.00000000    
   0.00000000    
   1.00000000    
   1.00000000    
   0.00000000    
   0.00000000    
   2.00000000    
   1.00000000    
   0.00000000    
   2.00000000    
   0.00000000    
   1.00000000    
   5.00000000    
   0.00000000    
   1.00000000    
   0.00000000    
   0.00000000    
   0.00000000    
   0.00000000    
   0.00000000    
   0.00000000    
   0.00000000    
   0.00000000    
   0.00000000    
   0.00000000    
   0.00000000    
   0.00000000    
   0.00000000    
   0.00000000    
   0.00000000    
   0.00000000    
   0.00000000    
   0.00000000    
   0.00000000    
   0.00000000    
   0.00000000    
   0.00000000    
   0.00000000    
   0.00000000    
   0.00000000    
   0.00000000    
   0.00000000    
   0.00000000    
   0.00000000    
   0.00000000    
   0.00000000    
   0.00000000    
   0.00000000    
   0.00000000    
   0.00000000    
   0.00000000    
   0.00000000    
   0.00000000    
   0.00000000    
   0.00000000    
   0.00000000    
   0.00000000    
   0.00000000    
   0.00000000    
   0.00000000    
   0.00000000    
   0.00000000    
   0.00000000    
   1.00000000    
   1.00000000    
   0.00000000    
   1.00000000    
   0.00000000    
   0.00000000    
   3.00000000    
   1.00000000    
   1.00000000    
   1.00000000    
   0.00000000    
   1.00000000    
   1.00000000    
   2.00000000    
   0.00000000    
   1.00000000    
   1.00000000    
   0.00000000    
   0.00000000    
   0.00000000    
   0.00000000    
   0.00000000    
   0.00000000    
   0.00000000    
   0.00000000    
   0.00000000    
   0.00000000    
   0.00000000    
   0.00000000    
   0.00000000    
   0.00000000    
   0.00000000    
   0.00000000    
   0.00000000    
   0.00000000    
   0.00000000    
   0.00000000    
   0.00000000    
   0.00000000    
   0.00000000    
   0.00000000    
   0.00000000    
   0.00000000    
   0.00000000    
   0.00000000    
   0.00000000    
   0.00000000    
   0.00000000    
   0.00000000    
   0.00000000    
   0.00000000    
   0.00000000    
   0.00000000    
   0.00000000    
   0.00000000    
   0.00000000    
   0.00000000    
   0.00000000    
   0.00000000    
   0.00000000    
   0.00000000    
   0.00000000    
   0.00000000    
   1.00000000    
   0.00000000    
   0.00000000    
   0.00000000    
   0.00000000    
   1.00000000    
   0.00000000    
   1.00000000    
   0.00000000    
   1.00000000    
   0.00000000    
   0.00000000    
   0.00000000    
   1.00000000    
   1.00000000    
   1.00000000    
   1.00000000    
   0.00000000    
   1.00000000    
   0.00000000    
   0.00000000    
   0.00000000    
   0.00000000    
   0.00000000    
   0.00000000    
   0.00000000    
   0.00000000    
   0.00000000    
   0.00000000    
   0.00000000    
   0.00000000    
   0.00000000    
   0.00000000    
   0.00000000    
   0.00000000    
   0.00000000    
   0.00000000    
   0.00000000    
   0.00000000    
   0.00000000    
   0.00000000    
   0.00000000    
   0.00000000    
   0.00000000    
   0.00000000    
   0.00000000    
   0.00000000    
   0.00000000    
   0.00000000    
   0.00000000    
   0.00000000    
   0.00000000    
   0.00000000    
   0.00000000    
   0.00000000    
   0.00000000    
   0.00000000    
   0.00000000    
   0.00000000    
   0.00000000    
   0.00000000    
   1.00000000    
   0.00000000    
   2.00000000    
   3.00000000    
   0.00000000    
   2.00000000    
   3.00000000    
   1.00000000    
   0.00000000    
   1.00000000    
   1.00000000    
   0.00000000    
   2.00000000    
   0.00000000    
   1.00000000    
   1.00000000    
   0.00000000    
   4.00000000    
   0.00000000    
   0.00000000    
   0.00000000    
   0.00000000    
   0.00000000    
   0.00000000    
   0.00000000    
   0.00000000    
   0.00000000    
   0.00000000    
   0.00000000    
   0.00000000    
   0.00000000    
   0.00000000    
   0.00000000    
   0.00000000    
   0.00000000    
   0.00000000    
   0.00000000    
   0.00000000    
   0.00000000    
   0.00000000    
   0.00000000    
   0.00000000    
   0.00000000    
   0.00000000    
   0.00000000    
   0.00000000    
   0.00000000    
   0.00000000    
   0.00000000    
   0.00000000    
   0.00000000    
   0.00000000    
   0.00000000    
   0.00000000    
   0.00000000    
   0.00000000    
   0.00000000    
   0.00000000    
   0.00000000    
   0.00000000    
   0.00000000    
   0.00000000    
   0.00000000    
   0.00000000    
   1.00000000    
   0.00000000    
   0.00000000    
   1.00000000    
   3.00000000    
   1.00000000    
   0.00000000    
   1.00000000    
   0.00000000    
   2.00000000    
   2.00000000    
   2.00000000    
   2.00000000    
   0.00000000    
   1.00000000    
   2.00000000    
   1.00000000    
   1.00000000    
   2.00000000    
   0.00000000    
   0.00000000    
   1.00000000    
   1.00000000    
   0.00000000    
   0.00000000    
   0.00000000    
   0.00000000    
   0.00000000    
   0.00000000    
   0.00000000    
   0.00000000    
   0.00000000    
   0.00000000    
   0.00000000    
   0.00000000    
   0.00000000    
   0.00000000    
   0.00000000    
   0.00000000    
   0.00000000    
   0.00000000    
   0.00000000    
   0.00000000    
   0.00000000    
   0.00000000    
   0.00000000    
   0.00000000    
   0.00000000    
   0.00000000    
   0.00000000    
   0.00000000    
   0.00000000    
   0.00000000    
   0.00000000    
   0.00000000    
   0.00000000    
   0.00000000    
   0.00000000    
   0.00000000    
   0.00000000    
   0.00000000    
   0.00000000    
   1.00000000    
   0.00000000    
   0.00000000    
   0.00000000    
   0.00000000    
   2.00000000    
   1.00000000    
   2.00000000    
   3.00000000    
   0.00000000    
   0.00000000    
   0.00000000    
   0.00000000    
   3.00000000    
   3.00000000    
   0.00000000    
   0.00000000    
   2.00000000    
   1.00000000    
   0.00000000    
   2.00000000    
   0.00000000    
   1.00000000    
   0.00000000    
   3.00000000    
   0.00000000    
   0.00000000    
   1.00000000    
   0.00000000    
   0.00000000    
   0.00000000    
   0.00000000    
   0.00000000    
   0.00000000    
   0.00000000    
   0.00000000    
   0.00000000    
   0.00000000    
   0.00000000    
   0.00000000    
   0.00000000    
   0.00000000    
   0.00000000    
   0.00000000    
   0.00000000    
   0.00000000    
   0.00000000    
   0.00000000    
   0.00000000    
   0.00000000    
   0.00000000    
   0.00000000    
   0.00000000    
   0.00000000    
   0.00000000    
   0.00000000    
   0.00000000    
   0.00000000    
   0.00000000    
   0.00000000    
   0.00000000    
   0.00000000    
   0.00000000    
   0.00000000    
   1.00000000    
   1.00000000    
   1.00000000    
   0.00000000    
   0.00000000    
   1.00000000    
   0.00000000    
   1.00000000    
   1.00000000    
   0.00000000    
   1.00000000    
   2.00000000    
   1.00000000    
   0.00000000    
   1.00000000    
   1.00000000    
   5.00000000    
   0.00000000    
   2.00000000    
   0.00000000    
   0.00000000    
   2.00000000    
   1.00000000    
   2.00000000    
   0.00000000    
   1.00000000    
   0.00000000    
   0.00000000    
   0.00000000    
   0.00000000    
   0.00000000    
   0.00000000    
   0.00000000    
   0.00000000    
   0.00000000    
   0.00000000    
   0.00000000    
   0.00000000    
   0.00000000    
   0.00000000    
   0.00000000    
   0.00000000    
   0.00000000    
   0.00000000    
   0.00000000    
   0.00000000    
   0.00000000    
   0.00000000    
   0.00000000    
   0.00000000    
   0.00000000    
   0.00000000    
   0.00000000    
   0.00000000    
   0.00000000    
   0.00000000    
   0.00000000    
   0.00000000    
   0.00000000    
   0.00000000    
   0.00000000    
   0.00000000    
   0.00000000    
   1.00000000    
   0.00000000    
   1.00000000    
   1.00000000    
   0.00000000    
   0.00000000    
   1.00000000    
   1.00000000    
   1.00000000    
   2.00000000    
   3.00000000    
   0.00000000    
   0.00000000    
   2.00000000    
   1.00000000    
   0.00000000    
   4.00000000    
   3.00000000    
   2.00000000    
   1.00000000    
   1.00000000    
   1.00000000    
   0.00000000    
   1.00000000    
   2.00000000    
   0.00000000    
   0.00000000    
   0.00000000    
   0.00000000    
   1.00000000    
   0.00000000    
   0.00000000    
   0.00000000    
   0.00000000    
   0.00000000    
   0.00000000    
   0.00000000    
   0.00000000    
   0.00000000    
   0.00000000    
   0.00000000    
   0.00000000    
   0.00000000    
   0.00000000    
   0.00000000    
   0.00000000    
   0.00000000    
   0.00000000    
   0.00000000    
   0.00000000    
   0.00000000    
   0.00000000    
   0.00000000    
   0.00000000    
   0.00000000    
   0.00000000    
   0.00000000    
   0.00000000    
   0.00000000    
   0.00000000    
   0.00000000    
   0.00000000    
   0.00000000    
   0.00000000    
   0.00000000    
   0.00000000    
   1.00000000    
   0.00000000    
   2.00000000    
   0.00000000    
   1.00000000    
   0.00000000    
   2.00000000    
   2.00000000    
   5.00000000    
   2.00000000    
   2.00000000    
   2.00000000    
   5.00000000    
   2.00000000    
   1.00000000    
   3.00000000    
   1.00000000    
   3.00000000    
   3.00000000    
   3.00000000    
   1.00000000    
   2.00000000    
   3.00000000    
   0.00000000    
   0.00000000    
   1.00000000    
   0.00000000    
   1.00000000    
   1.00000000    
   0.00000000    
   0.00000000    
   0.00000000    
   0.00000000    
   0.00000000    
   0.00000000    
   0.00000000    
   0.00000000    
   0.00000000    
   0.00000000    
   0.00000000    
   0.00000000    
   0.00000000    
   0.00000000    
   0.00000000    
   0.00000000    
   0.00000000    
   0.00000000    
   0.00000000    
   0.00000000    
   0.00000000    
   0.00000000    
   0.00000000    
   0.00000000    
   0.00000000    
   0.00000000    
   0.00000000    
   0.00000000    
   0.00000000    
   0.00000000    
   0.00000000    
   0.00000000    
   0.00000000    
   0.00000000    
   0.00000000    
   1.00000000    
   0.00000000    
   0.00000000    
   2.00000000    
   2.00000000    
   1.00000000    
   1.00000000    
   2.00000000    
   2.00000000    
   1.00000000    
   1.00000000    
   0.00000000    
   3.00000000    
   4.00000000    
   2.00000000    
   2.00000000    
   2.00000000    
   1.00000000    
   1.00000000    
   2.00000000    
   1.00000000    
   2.00000000    
   0.00000000    
   0.00000000    
   0.00000000    
   1.00000000    
   2.00000000    
   1.00000000    
   1.00000000    
   0.00000000    
   0.00000000    
   0.00000000    
   0.00000000    
   0.00000000    
   0.00000000    
   0.00000000    
   0.00000000    
   0.00000000    
   0.00000000    
   0.00000000    
   0.00000000    
   0.00000000    
   0.00000000    
   0.00000000    
   0.00000000    
   0.00000000    
   0.00000000    
   0.00000000    
   0.00000000    
   0.00000000    
   0.00000000    
   0.00000000    
   0.00000000    
   0.00000000    
   0.00000000    
   0.00000000    
   0.00000000    
   0.00000000    
   0.00000000    
   0.00000000    
   0.00000000    
   0.00000000    
   1.00000000    
   1.00000000    
   1.00000000    
   2.00000000    
   2.00000000    
   1.00000000    
   0.00000000    
   1.00000000    
   1.00000000    
   1.00000000    
   1.00000000    
   1.00000000    
   3.00000000    
   0.00000000    
   2.00000000    
   1.00000000    
   1.00000000    
   1.00000000    
   1.00000000    
   3.00000000    
   1.00000000    
   0.00000000    
   1.00000000    
   2.00000000    
   1.00000000    
   0.00000000    
   1.00000000    
   2.00000000    
   2.00000000    
   0.00000000    
   0.00000000    
   0.00000000    
   0.00000000    
   0.00000000    
   0.00000000    
   0.00000000    
   0.00000000    
   0.00000000    
   0.00000000    
   0.00000000    
   0.00000000    
   0.00000000    
   0.00000000    
   0.00000000    
   0.00000000    
   0.00000000    
   0.00000000    
   0.00000000    
   0.00000000    
   0.00000000    
   0.00000000    
   0.00000000    
   0.00000000    
   0.00000000    
   0.00000000    
   0.00000000    
   0.00000000    
   0.00000000    
   0.00000000    
   0.00000000    
   0.00000000    
   0.00000000    
   0.00000000    
   1.00000000    
   0.00000000    
   0.00000000    
   1.00000000    
   0.00000000    
   0.00000000    
   3.00000000    
   0.00000000    
   1.00000000    
   2.00000000    
   1.00000000    
   3.00000000    
   1.00000000    
   3.00000000    
   1.00000000    
   2.00000000    
   1.00000000    
   0.00000000    
   3.00000000    
   0.00000000    
   0.00000000    
   0.00000000    
   1.00000000    
   0.00000000    
   1.00000000    
   1.00000000    
   3.00000000    
   0.00000000    
   0.00000000    
   0.00000000    
   1.00000000    
   0.00000000    
   0.00000000    
   0.00000000    
   0.00000000    
   0.00000000    
   0.00000000    
   0.00000000    
   0.00000000    
   0.00000000    
   0.00000000    
   0.00000000    
   0.00000000    
   0.00000000    
   0.00000000    
   0.00000000    
   0.00000000    
   0.00000000    
   0.00000000    
   0.00000000    
   0.00000000    
   0.00000000    
   0.00000000    
   0.00000000    
   0.00000000    
   0.00000000    
   0.00000000    
   0.00000000    
   0.00000000    
   0.00000000    
   0.00000000    
   0.00000000    
   0.00000000    
   0.00000000    
   1.00000000    
   2.00000000    
   0.00000000    
   1.00000000    
   1.00000000    
   1.00000000    
   0.00000000    
   1.00000000    
   1.00000000    
   1.00000000    
   3.00000000    
   1.00000000    
   1.00000000    
   2.00000000    
   3.00000000    
   4.00000000    
   1.00000000    
   6.00000000    
   2.00000000    
   3.00000000    
   1.00000000    
   2.00000000    
   0.00000000    
   2.00000000    
   0.00000000    
   1.00000000    
   1.00000000    
   3.00000000    
   2.00000000    
   0.00000000    
   1.00000000    
   1.00000000    
   1.00000000    
   0.00000000    
   0.00000000    
   0.00000000    
   0.00000000    
   0.00000000    
   0.00000000    
   0.00000000    
   0.00000000    
   0.00000000    
   0.00000000    
   0.00000000    
   0.00000000    
   0.00000000    
   0.00000000    
   0.00000000    
   0.00000000    
   0.00000000    
   0.00000000    
   0.00000000    
   0.00000000    
   0.00000000    
   0.00000000    
   0.00000000    
   0.00000000    
   0.00000000    
   0.00000000    
   0.00000000    
   0.00000000    
   0.00000000    
   0.00000000    
   0.00000000    
   2.00000000    
   4.00000000    
   3.00000000    
   1.00000000    
   0.00000000    
   0.00000000    
   2.00000000    
   1.00000000    
   3.00000000    
   1.00000000    
   0.00000000    
   2.00000000    
   2.00000000    
   2.00000000    
   5.00000000    
   1.00000000    
   5.00000000    
   0.00000000    
   4.00000000    
   1.00000000    
   2.00000000    
   3.00000000    
   0.00000000    
   1.00000000    
   4.00000000    
   0.00000000    
   2.00000000    
   1.00000000    
   2.00000000    
   1.00000000    
   1.00000000    
   0.00000000    
   1.00000000    
   0.00000000    
   0.00000000    
   0.00000000    
   0.00000000    
   0.00000000    
   0.00000000    
   0.00000000    
   0.00000000    
   0.00000000    
   0.00000000    
   0.00000000    
   0.00000000    
   0.00000000    
   0.00000000    
   0.00000000    
   0.00000000    
   0.00000000    
   0.00000000    
   0.00000000    
   0.00000000    
   0.00000000    
   0.00000000    
   0.00000000    
   0.00000000    
   0.00000000    
   0.00000000    
   0.00000000    
   0.00000000    
   0.00000000    
   0.00000000    
   1.00000000    
   2.00000000    
   0.00000000    
   0.00000000    
   0.00000000    
   0.00000000    
   0.00000000    
   2.00000000    
   1.00000000    
   2.00000000    
   1.00000000    
   1.00000000    
   2.00000000    
   2.00000000    
   4.00000000    
   2.00000000    
   2.00000000    
   1.00000000    
   4.00000000    
   6.00000000    
   2.00000000    
   3.00000000    
   3.00000000    
   1.00000000    
   1.00000000    
   3.00000000    
   3.00000000    
   2.00000000    
   1.00000000    
   1.00000000    
   2.00000000    
   1.00000000    
   0.00000000    
   1.00000000    
   0.00000000    
   0.00000000    
   0.00000000    
   0.00000000    
   0.00000000    
   0.00000000    
   0.00000000    
   0.00000000    
   0.00000000    
   0.00000000    
   0.00000000    
   0.00000000    
   0.00000000    
   0.00000000    
   0.00000000    
   0.00000000    
   0.00000000    
   0.00000000    
   0.00000000    
   0.00000000    
   0.00000000    
   0.00000000    
   0.00000000    
   0.00000000    
   0.00000000    
   0.00000000    
   0.00000000    
   0.00000000    
   0.00000000    
   0.00000000    
   0.00000000    
   0.00000000    
   1.00000000    
   0.00000000    
   1.00000000    
   0.00000000    
   1.00000000    
   0.00000000    
   1.00000000    
   2.00000000    
   1.00000000    
   0.00000000    
   2.00000000    
   2.00000000    
   0.00000000    
   4.00000000    
   3.00000000    
   2.00000000    
   4.00000000    
   3.00000000    
   4.00000000    
   4.00000000    
   2.00000000    
   5.00000000    
   1.00000000    
   5.00000000    
   1.00000000    
   3.00000000    
   0.00000000    
   0.00000000    
   0.00000000    
   1.00000000    
   2.00000000    
   2.00000000    
   0.00000000    
   0.00000000    
   0.00000000    
   0.00000000    
   0.00000000    
   0.00000000    
   0.00000000    
   0.00000000    
   0.00000000    
   0.00000000    
   0.00000000    
   0.00000000    
   0.00000000    
   0.00000000    
   0.00000000    
   0.00000000    
   0.00000000    
   0.00000000    
   0.00000000    
   0.00000000    
   0.00000000    
   0.00000000    
   0.00000000    
   0.00000000    
   0.00000000    
   0.00000000    
   0.00000000    
   0.00000000    
   0.00000000    
   0.00000000    
   0.00000000    
   0.00000000    
   0.00000000    
   0.00000000    
   1.00000000    
   0.00000000    
   0.00000000    
   0.00000000    
   0.00000000    
   0.00000000    
   4.00000000    
   1.00000000    
   2.00000000    
   3.00000000    
   5.00000000    
   1.00000000    
   2.00000000    
   6.00000000    
   4.00000000    
   4.00000000    
   3.00000000    
   3.00000000    
   4.00000000    
   3.00000000    
   3.00000000    
   1.00000000    
   4.00000000    
   1.00000000    
   2.00000000    
   1.00000000    
   1.00000000    
   0.00000000    
   1.00000000    
   0.00000000    
   0.00000000    
   0.00000000    
   0.00000000    
   0.00000000    
   0.00000000    
   0.00000000    
   0.00000000    
   0.00000000    
   0.00000000    
   0.00000000    
   0.00000000    
   0.00000000    
   0.00000000    
   0.00000000    
   0.00000000    
   0.00000000    
   0.00000000    
   0.00000000    
   0.00000000    
   0.00000000    
   0.00000000    
   0.00000000    
   0.00000000    
   0.00000000    
   0.00000000    
   0.00000000    
   0.00000000    
   0.00000000    
   0.00000000    
   0.00000000    
   0.00000000    
   0.00000000    
   0.00000000    
   0.00000000    
   1.00000000    
   0.00000000    
   2.00000000    
   1.00000000    
   2.00000000    
   1.00000000    
   2.00000000    
   5.00000000    
   3.00000000    
   2.00000000    
   1.00000000    
   2.00000000    
   1.00000000    
   1.00000000    
   4.00000000    
   4.00000000    
   2.00000000    
   2.00000000    
   0.00000000    
   0.00000000    
   3.00000000    
   1.00000000    
   0.00000000    
   2.00000000    
   1.00000000    
   0.00000000    
   3.00000000    
   0.00000000    
   1.00000000    
   0.00000000    
   0.00000000    
   0.00000000    
   0.00000000    
   0.00000000    
   0.00000000    
   0.00000000    
   0.00000000    
   0.00000000    
   0.00000000    
   0.00000000    
   0.00000000    
   0.00000000    
   0.00000000    
   0.00000000    
   0.00000000    
   0.00000000    
   0.00000000    
   0.00000000    
   0.00000000    
   0.00000000    
   0.00000000    
   0.00000000    
   0.00000000    
   0.00000000    
   0.00000000    
   0.00000000    
   0.00000000    
   0.00000000    
   0.00000000    
   0.00000000    
   0.00000000    
   0.00000000    
   1.00000000    
   0.00000000    
   3.00000000    
   2.00000000    
   2.00000000    
   2.00000000    
   1.00000000    
   5.00000000    
   1.00000000    
   4.00000000    
   1.00000000    
   2.00000000    
   4.00000000    
   2.00000000    
   3.00000000    
   2.00000000    
   5.00000000    
   1.00000000    
   1.00000000    
   1.00000000    
   0.00000000    
   0.00000000    
   0.00000000    
   1.00000000    
   0.00000000    
   2.00000000    
   0.00000000    
   1.00000000    
   2.00000000    
   0.00000000    
   1.00000000    
   0.00000000    
   0.00000000    
   0.00000000    
   0.00000000    
   0.00000000    
   0.00000000    
   0.00000000    
   0.00000000    
   0.00000000    
   0.00000000    
   0.00000000    
   0.00000000    
   0.00000000    
   0.00000000    
   0.00000000    
   0.00000000    
   0.00000000    
   0.00000000    
   0.00000000    
   0.00000000    
   0.00000000    
   0.00000000    
   0.00000000    
   0.00000000    
   0.00000000    
   0.00000000    
   0.00000000    
   0.00000000    
   0.00000000    
   0.00000000    
   0.00000000    
   0.00000000    
   1.00000000    
   0.00000000    
   1.00000000    
   3.00000000    
   0.00000000    
   1.00000000    
   1.00000000    
   1.00000000    
   1.00000000    
   3.00000000    
   0.00000000    
   1.00000000    
   1.00000000    
   3.00000000    
   3.00000000    
   2.00000000    
   1.00000000    
   3.00000000    
   1.00000000    
   1.00000000    
   1.00000000    
   3.00000000    
   1.00000000    
   3.00000000    
   2.00000000    
   2.00000000    
   1.00000000    
   1.00000000    
   1.00000000    
   1.00000000    
   1.00000000    
   1.00000000    
   0.00000000    
   0.00000000    
   0.00000000    
   0.00000000    
   0.00000000    
   0.00000000    
   0.00000000    
   0.00000000    
   0.00000000    
   0.00000000    
   0.00000000    
   0.00000000    
   0.00000000    
   0.00000000    
   0.00000000    
   0.00000000    
   0.00000000    
   0.00000000    
   0.00000000    
   0.00000000    
   0.00000000    
   0.00000000    
   0.00000000    
   0.00000000    
   0.00000000    
   0.00000000    
   0.00000000    
   0.00000000    
   0.00000000    
   0.00000000    
   0.00000000    
   0.00000000    
   0.00000000    
   0.00000000    
   0.00000000    
   1.00000000    
   0.00000000    
   1.00000000    
   2.00000000    
   2.00000000    
   0.00000000    
   1.00000000    
   3.00000000    
   1.00000000    
   2.00000000    
   6.00000000    
   4.00000000    
   4.00000000    
   0.00000000    
   1.00000000    
   2.00000000    
   2.00000000    
   4.00000000    
   1.00000000    
   2.00000000    
   0.00000000    
   0.00000000    
   0.00000000    
   2.00000000    
   1.00000000    
   1.00000000    
   1.00000000    
   0.00000000    
   0.00000000    
   0.00000000    
   0.00000000    
   0.00000000    
   0.00000000    
   0.00000000    
   0.00000000    
   0.00000000    
   0.00000000    
   0.00000000    
   0.00000000    
   0.00000000    
   0.00000000    
   0.00000000    
   0.00000000    
   0.00000000    
   0.00000000    
   0.00000000    
   0.00000000    
   0.00000000    
   0.00000000    
   0.00000000    
   0.00000000    
   0.00000000    
   0.00000000    
   0.00000000    
   0.00000000    
   0.00000000    
   0.00000000    
   0.00000000    
   0.00000000    
   0.00000000    
   0.00000000    
   0.00000000    
   0.00000000    
   2.00000000    
   0.00000000    
   0.00000000    
   0.00000000    
   1.00000000    
   1.00000000    
   0.00000000    
   3.00000000    
   0.00000000    
   0.00000000    
   3.00000000    
   2.00000000    
   2.00000000    
   4.00000000    
   1.00000000    
   1.00000000    
   3.00000000    
   2.00000000    
   1.00000000    
   4.00000000    
   2.00000000    
   3.00000000    
   3.00000000    
   1.00000000    
   1.00000000    
   1.00000000    
   1.00000000    
   0.00000000    
   1.00000000    
   2.00000000    
   0.00000000    
   0.00000000    
   0.00000000    
   0.00000000    
   0.00000000    
   0.00000000    
   0.00000000    
   0.00000000    
   0.00000000    
   0.00000000    
   0.00000000    
   0.00000000    
   0.00000000    
   0.00000000    
   0.00000000    
   0.00000000    
   0.00000000    
   0.00000000    
   0.00000000    
   0.00000000    
   0.00000000    
   0.00000000    
   0.00000000    
   0.00000000    
   0.00000000    
   0.00000000    
   0.00000000    
   0.00000000    
   0.00000000    
   0.00000000    
   0.00000000    
   0.00000000    
   0.00000000    
   1.00000000    
   1.00000000    
   1.00000000    
   1.00000000    
   0.00000000    
   1.00000000    
   0.00000000    
   0.00000000    
   1.00000000    
   2.00000000    
   4.00000000    
   2.00000000    
   3.00000000    
   3.00000000    
   7.00000000    
   2.00000000    
   3.00000000    
   0.00000000    
   1.00000000    
   5.00000000    
   2.00000000    
   3.00000000    
   0.00000000    
   1.00000000    
   0.00000000    
   1.00000000    
   1.00000000    
   1.00000000    
   1.00000000    
   0.00000000    
   0.00000000    
   0.00000000    
   0.00000000    
   0.00000000    
   0.00000000    
   0.00000000    
   0.00000000    
   0.00000000    
   0.00000000    
   0.00000000    
   0.00000000    
   0.00000000    
   0.00000000    
   0.00000000    
   0.00000000    
   0.00000000    
   0.00000000    
   0.00000000    
   0.00000000    
   0.00000000    
   0.00000000    
   0.00000000    
   0.00000000    
   0.00000000    
   0.00000000    
   0.00000000    
   0.00000000    
   0.00000000    
   0.00000000    
   0.00000000    
   0.00000000    
   0.00000000    
   0.00000000    
   0.00000000    
   1.00000000    
   0.00000000    
   3.00000000    
   1.00000000    
   2.00000000    
   1.00000000    
   1.00000000    
   1.00000000    
   0.00000000    
   1.00000000    
   4.00000000    
   0.00000000    
   3.00000000    
   3.00000000    
   3.00000000    
   3.00000000    
   3.00000000    
   0.00000000    
   2.00000000    
   1.00000000    
   2.00000000    
   2.00000000    
   2.00000000    
   0.00000000    
   3.00000000    
   1.00000000    
   1.00000000    
   1.00000000    
   3.00000000    
   0.00000000    
   0.00000000    
   0.00000000    
   0.00000000    
   0.00000000    
   0.00000000    
   0.00000000    
   0.00000000    
   0.00000000    
   0.00000000    
   0.00000000    
   0.00000000    
   0.00000000    
   0.00000000    
   0.00000000    
   0.00000000    
   0.00000000    
   0.00000000    
   0.00000000    
   0.00000000    
   0.00000000    
   0.00000000    
   0.00000000    
   0.00000000    
   0.00000000    
   0.00000000    
   0.00000000    
   0.00000000    
   0.00000000    
   0.00000000    
   0.00000000    
   0.00000000    
   0.00000000    
   0.00000000    
   0.00000000    
   0.00000000    
   2.00000000    
   1.00000000    
   0.00000000    
   3.00000000    
   0.00000000    
   1.00000000    
   1.00000000    
   1.00000000    
   1.00000000    
   1.00000000    
   1.00000000    
   1.00000000    
   2.00000000    
   1.00000000    
   3.00000000    
   1.00000000    
   1.00000000    
   0.00000000    
   3.00000000    
   1.00000000    
   9.00000000    
   2.00000000    
   1.00000000    
   1.00000000    
   1.00000000    
   1.00000000    
   0.00000000    
   0.00000000    
   0.00000000    
   0.00000000    
   0.00000000    
   0.00000000    
   0.00000000    
   0.00000000    
   0.00000000    
   0.00000000    
   0.00000000    
   0.00000000    
   0.00000000    
   0.00000000    
   0.00000000    
   0.00000000    
   0.00000000    
   0.00000000    
   0.00000000    
   0.00000000    
   0.00000000    
   0.00000000    
   0.00000000    
   0.00000000    
   0.00000000    
   0.00000000    
   0.00000000    
   0.00000000    
   0.00000000    
   0.00000000    
   0.00000000    
   0.00000000    
   0.00000000    
   0.00000000    
   0.00000000    
   0.00000000    
   0.00000000    
   0.00000000    
   0.00000000    
   1.00000000    
   1.00000000    
   1.00000000    
   1.00000000    
   2.00000000    
   3.00000000    
   1.00000000    
   0.00000000    
   2.00000000    
   3.00000000    
   2.00000000    
   0.00000000    
   7.00000000    
   4.00000000    
   4.00000000    
   3.00000000    
   2.00000000    
   5.00000000    
   2.00000000    
   1.00000000    
   0.00000000    
   0.00000000    
   0.00000000    
   0.00000000    
   1.00000000    
   1.00000000    
   0.00000000    
   0.00000000    
   0.00000000    
   0.00000000    
   0.00000000    
   0.00000000    
   0.00000000    
   0.00000000    
   0.00000000    
   0.00000000    
   0.00000000    
   0.00000000    
   0.00000000    
   0.00000000    
   0.00000000    
   0.00000000    
   0.00000000    
   0.00000000    
   0.00000000    
   0.00000000    
   0.00000000    
   0.00000000    
   0.00000000    
   0.00000000    
   0.00000000    
   0.00000000    
   0.00000000    
   0.00000000    
   0.00000000    
   0.00000000    
   0.00000000    
   0.00000000    
   0.00000000    
   0.00000000    
   0.00000000    
   0.00000000    
   0.00000000    
   0.00000000    
   1.00000000    
   3.00000000    
   2.00000000    
   0.00000000    
   0.00000000    
   3.00000000    
   0.00000000    
   2.00000000    
   3.00000000    
   2.00000000    
   5.00000000    
   9.00000000    
   7.00000000    
   1.00000000    
   7.00000000    
   5.00000000    
   2.00000000    
   1.00000000    
   2.00000000    
   1.00000000    
   3.00000000    
   0.00000000    
   1.00000000    
   3.00000000    
   1.00000000    
   0.00000000    
   0.00000000    
   0.00000000    
   0.00000000    
   0.00000000    
   0.00000000    
   0.00000000    
   0.00000000    
   0.00000000    
   0.00000000    
   0.00000000    
   0.00000000    
   0.00000000    
   0.00000000    
   0.00000000    
   0.00000000    
   0.00000000    
   0.00000000    
   0.00000000    
   0.00000000    
   0.00000000    
   0.00000000    
   0.00000000    
   0.00000000    
   0.00000000    
   0.00000000    
   0.00000000    
   0.00000000    
   0.00000000    
   0.00000000    
   0.00000000    
   0.00000000    
   0.00000000    
   0.00000000    
   0.00000000    
   0.00000000    
   0.00000000    
   0.00000000    
   0.00000000    
   0.00000000    
   0.00000000    
   2.00000000    
   2.00000000    
   2.00000000    
   2.00000000    
   6.00000000    
   0.00000000    
   0.00000000    
   2.00000000    
   4.00000000    
   5.00000000    
   9.00000000    
   3.00000000    
   7.00000000    
   6.00000000    
   2.00000000    
   0.00000000    
   0.00000000    
   0.00000000    
   1.00000000    
   1.00000000    
   0.00000000    
   1.00000000    
   0.00000000    
   1.00000000    
   1.00000000    
   0.00000000    
   0.00000000    
   0.00000000    
   0.00000000    
   0.00000000    
   0.00000000    
   0.00000000    
   0.00000000    
   0.00000000    
   0.00000000    
   0.00000000    
   0.00000000    
   0.00000000    
   0.00000000    
   0.00000000    
   0.00000000    
   0.00000000    
   0.00000000    
   0.00000000    
   0.00000000    
   0.00000000    
   0.00000000    
   0.00000000    
   0.00000000    
   0.00000000    
   0.00000000    
   0.00000000    
   0.00000000    
   0.00000000    
   0.00000000    
   0.00000000    
   0.00000000    
   0.00000000    
   0.00000000    
   0.00000000    
   0.00000000    
   0.00000000    
   0.00000000    
   0.00000000    
   1.00000000    
   0.00000000    
   4.00000000    
   0.00000000    
   3.00000000    
   1.00000000    
   2.00000000    
   3.00000000    
   2.00000000    
   2.00000000    
   2.00000000    
   3.00000000    
   4.00000000    
   3.00000000    
   2.00000000    
   1.00000000    
   1.00000000    
   0.00000000    
   2.00000000    
   1.00000000    
   0.00000000    
   1.00000000    
   0.00000000    
   0.00000000    
   0.00000000    
   0.00000000    
   0.00000000    
   0.00000000    
   0.00000000    
   0.00000000    
   0.00000000    
   0.00000000    
   0.00000000    
   0.00000000    
   0.00000000    
   0.00000000    
   0.00000000    
   0.00000000    
   0.00000000    
   0.00000000    
   0.00000000    
   0.00000000    
   0.00000000    
   0.00000000    
   0.00000000    
   0.00000000    
   0.00000000    
   0.00000000    
   0.00000000    
   0.00000000    
   0.00000000    
   0.00000000    
   0.00000000    
   0.00000000    
   0.00000000    
   0.00000000    
   0.00000000    
   0.00000000    
   0.00000000    
   0.00000000    
   0.00000000    
   0.00000000    
   0.00000000    
   0.00000000    
   0.00000000    
   0.00000000    
   1.00000000    
   4.00000000    
   1.00000000    
   1.00000000    
   3.00000000    
   1.00000000    
   2.00000000    
   4.00000000    
   1.00000000    
   2.00000000    
   4.00000000    
   1.00000000    
   5.00000000    
   2.00000000    
   1.00000000    
   0.00000000    
   0.00000000    
   1.00000000    
   0.00000000    
   0.00000000    
   0.00000000    
   0.00000000    
   0.00000000    
   0.00000000    
   0.00000000    
   0.00000000    
   0.00000000    
   0.00000000    
   0.00000000    
   0.00000000    
   0.00000000    
   0.00000000    
   0.00000000    
   0.00000000    
   0.00000000    
   0.00000000    
   0.00000000    
   0.00000000    
   0.00000000    
   0.00000000    
   0.00000000    
   0.00000000    
   0.00000000    
   0.00000000    
   0.00000000    
   0.00000000    
   0.00000000    
   0.00000000    
   0.00000000    
   0.00000000    
   0.00000000    
   0.00000000    
   0.00000000    
   0.00000000    
   0.00000000    
   0.00000000    
   0.00000000    
   0.00000000    
   0.00000000    
   0.00000000    
   0.00000000    
   0.00000000    
   0.00000000    
   0.00000000    
   0.00000000    
   4.00000000    
   3.00000000    
   0.00000000    
   1.00000000    
   0.00000000    
   1.00000000    
   6.00000000    
   0.00000000    
   2.00000000    
   3.00000000    
   1.00000000    
   1.00000000    
   1.00000000    
   0.00000000    
   0.00000000    
   2.00000000    
   1.00000000    
   0.00000000    
   0.00000000    
   0.00000000    
   0.00000000    
   0.00000000    
   0.00000000    
   0.00000000    
   0.00000000    
   0.00000000    
   0.00000000    
   0.00000000    
   0.00000000    
   0.00000000    
   0.00000000    
   0.00000000    
   0.00000000    
   0.00000000    
   0.00000000    
   0.00000000    
   0.00000000    
   0.00000000    
   0.00000000    
   0.00000000    
   0.00000000    
   0.00000000    
   0.00000000    
   0.00000000    
   0.00000000    
   0.00000000    
   0.00000000    
   0.00000000    
   0.00000000    
   0.00000000    
   0.00000000    
   0.00000000    
   0.00000000    
   0.00000000    
   0.00000000    
   0.00000000    
   0.00000000    
   0.00000000    
   0.00000000    
   0.00000000    
   0.00000000    
   0.00000000    
   0.00000000    
   0.00000000    
   0.00000000    
   1.00000000    
   0.00000000    
   0.00000000    
   0.00000000    
   1.00000000    
   0.00000000    
   1.00000000    
   1.00000000    
   1.00000000    
   0.00000000    
   3.00000000    
   0.00000000    
   0.00000000    
   0.00000000    
   0.00000000    
   0.00000000    
   0.00000000    
   0.00000000    
   0.00000000    
   0.00000000    
   0.00000000    
   0.00000000    
   0.00000000    
   0.00000000    
   0.00000000    
   0.00000000    
   0.00000000    
   0.00000000    
   0.00000000    
   0.00000000    
   0.00000000    
   0.00000000    
   0.00000000    
   0.00000000    
   0.00000000    
   0.00000000    
   0.00000000    
   0.00000000    
   0.00000000    
   0.00000000    
   0.00000000    
   0.00000000    
   0.00000000    
   0.00000000    
   0.00000000    
   0.00000000    
   0.00000000    
   0.00000000    
   0.00000000    
   0.00000000    
   0.00000000    
   0.00000000    
   0.00000000    
   0.00000000    
   0.00000000    
   0.00000000    
   0.00000000    
   0.00000000    
   0.00000000    
   0.00000000    
   0.00000000    
   0.00000000    
   0.00000000    
   0.00000000    
   0.00000000    
   0.00000000    
   0.00000000    
   1.00000000    
   1.00000000    
   0.00000000    
   0.00000000    
   1.00000000    
   1.00000000    
   1.00000000    
   0.00000000    
   0.00000000    
   0.00000000    
   0.00000000    
   0.00000000    
   0.00000000    
   0.00000000    
   0.00000000    
   0.00000000    
   0.00000000    
   0.00000000    
   0.00000000    
   0.00000000    
   0.00000000    
   0.00000000    
   0.00000000    
   0.00000000    
   0.00000000    
   0.00000000    
   0.00000000    
   0.00000000    
   0.00000000    
   0.00000000    
   0.00000000    
   0.00000000    
   0.00000000    
   0.00000000    
   0.00000000    
   0.00000000    
   0.00000000    
   0.00000000    
   0.00000000    
   0.00000000    
   0.00000000    
   0.00000000    
   0.00000000    
   0.00000000    
   0.00000000    
   0.00000000    
   0.00000000    
   0.00000000    
   0.00000000    
   0.00000000    
   0.00000000    
   0.00000000    
   0.00000000    
   0.00000000    
   0.00000000    
   0.00000000    
   0.00000000    
   0.00000000    
   0.00000000    
   0.00000000    
   0.00000000    
   0.00000000    
   0.00000000    
   0.00000000    
   0.00000000    
   0.00000000    
   0.00000000    
   0.00000000    
   0.00000000    
   0.00000000    
   0.00000000    
   0.00000000    
   0.00000000    
   0.00000000    
   0.00000000    
   0.00000000    
   0.00000000    
   0.00000000    
   0.00000000    
   0.00000000    
   0.00000000    
   0.00000000    
   0.00000000    
   0.00000000    
   0.00000000    
   0.00000000    
   0.00000000    
   0.00000000    
   0.00000000    
   0.00000000    
   0.00000000    
   0.00000000    
   0.00000000    
   0.00000000    
   0.00000000    
   0.00000000    
   0.00000000    
   0.00000000    
   0.00000000    
   0.00000000    
   0.00000000    
   0.00000000    
   0.00000000    
   0.00000000    
   0.00000000    
   0.00000000    
   0.00000000    
   0.00000000    
   0.00000000    
   0.00000000    
   0.00000000    
   0.00000000    
   0.00000000    
   0.00000000    
   0.00000000    
   0.00000000    
   0.00000000    
   0.00000000    
   0.00000000    
   0.00000000    
   0.00000000    
   0.00000000    
   0.00000000    
   0.00000000    
   0.00000000    
   0.00000000    
   0.00000000    
   0.00000000    
   0.00000000    
   0.00000000    
   0.00000000    
   0.00000000    
   0.00000000    
   0.00000000    
   0.00000000    
   0.00000000    
   0.00000000    
   0.00000000    
   0.00000000    
   0.00000000    
   0.00000000    
   0.00000000    
   0.00000000    
   0.00000000    
   0.00000000    
   0.00000000    
   0.00000000    
   0.00000000    
   0.00000000    
   0.00000000    
   0.00000000    
   0.00000000    
   0.00000000    
   0.00000000    
   0.00000000    
   0.00000000    
   0.00000000    
   0.00000000    
   0.00000000    
   0.00000000    
   0.00000000    
   0.00000000    
   0.00000000    
   0.00000000    
   0.00000000    
   0.00000000    
   0.00000000    
   0.00000000    
   0.00000000    
   0.00000000    
   0.00000000    
   0.00000000    
   0.00000000    
   0.00000000    
   0.00000000    
   0.00000000    
   0.00000000    
   0.00000000    
   0.00000000    
   0.00000000    
   0.00000000    
   0.00000000    
   0.00000000    
   0.00000000    
   0.00000000    
   0.00000000    
   0.00000000    
   0.00000000    
   0.00000000    
   0.00000000    
   0.00000000    
   0.00000000    
   0.00000000    
   0.00000000    
   0.00000000    
   0.00000000    
   0.00000000    
   0.00000000    
   0.00000000    
   0.00000000    
   0.00000000    
   0.00000000    
   0.00000000    
   0.00000000    
   0.00000000    
   0.00000000    
   0.00000000    
   0.00000000    
   0.00000000    
   0.00000000    
   0.00000000    
   0.00000000    
   0.00000000    
   0.00000000    
   0.00000000    
   0.00000000    
   0.00000000    
   0.00000000    
   0.00000000    
   0.00000000    
   0.00000000    
   0.00000000    
   0.00000000    
   0.00000000    
   0.00000000    
   0.00000000    
   0.00000000    
   0.00000000    
   0.00000000    
   0.00000000    
   0.00000000    
   0.00000000    
   0.00000000    
   0.00000000    
   0.00000000    
   0.00000000    
   0.00000000    
   0.00000000    
   0.00000000    
   0.00000000    
   0.00000000    
   0.00000000    
   0.00000000    
   0.00000000    
   0.00000000    
   0.00000000    
   0.00000000    
   0.00000000    
   0.00000000    
   0.00000000    
   0.00000000    
   0.00000000    
   0.00000000    
   0.00000000    
   0.00000000    
   0.00000000    
   0.00000000    
   0.00000000    
   0.00000000    
   0.00000000    
   0.00000000    
   0.00000000    
   0.00000000    
   0.00000000    
   0.00000000    
   0.00000000    
   0.00000000    
   0.00000000    
   0.00000000    
   0.00000000    
   0.00000000    
   0.00000000    
   0.00000000    
   0.00000000    
   0.00000000    
   0.00000000    
   0.00000000    
   0.00000000    
   0.00000000    
   0.00000000    
   0.00000000    
   0.00000000    
   0.00000000    
   0.00000000    
   0.00000000    
   0.00000000    
   0.00000000    
   0.00000000    
   0.00000000    
   0.00000000    
   0.00000000    
   0.00000000    
   0.00000000    
   0.00000000    
   0.00000000    
   0.00000000    
   0.00000000    
   0.00000000    
   0.00000000    
   0.00000000    
   0.00000000    
   0.00000000    
   0.00000000    
   0.00000000    
   0.00000000    
   0.00000000    
   0.00000000    
   0.00000000    
   0.00000000    
   0.00000000    
   0.00000000    
   0.00000000    
   0.00000000    
   0.00000000    
   0.00000000    
   0.00000000    
   0.00000000    
   0.00000000    
   0.00000000    
   0.00000000    
   0.00000000    
   0.00000000    
   0.00000000    
   0.00000000    
   0.00000000    
   0.00000000    
   0.00000000    
   0.00000000    
   0.00000000    
   0.00000000    
   0.00000000    
   0.00000000    
   0.00000000    
   0.00000000    
   0.00000000    
   0.00000000    
   0.00000000    
   0.00000000    
   0.00000000    
   0.00000000    
   0.00000000    
   0.00000000    
   0.00000000    
   0.00000000    
   0.00000000    
   0.00000000    
   0.00000000    
   0.00000000    
   0.00000000    
   0.00000000    
   0.00000000    
   0.00000000    
   0.00000000    
   0.00000000    
   0.00000000    
   0.00000000    
   0.00000000    
   0.00000000    
   0.00000000    
   0.00000000    
   0.00000000    
   0.00000000    
   0.00000000    
   0.00000000    
   0.00000000    
   0.00000000    
   0.00000000    
   0.00000000    
   0.00000000    
   0.00000000    
   0.00000000    
   0.00000000    
   0.00000000    
   0.00000000    
   0.00000000    
   0.00000000    
   0.00000000    
   0.00000000    
   0.00000000    
   0.00000000    
   0.00000000    
   0.00000000    
   0.00000000    
   0.00000000    
   0.00000000    
   0.00000000    
   0.00000000    
   0.00000000    
   0.00000000    
   0.00000000    
   0.00000000    
   0.00000000    
   0.00000000    
   0.00000000    
   0.00000000    
   0.00000000    
   0.00000000    
   0.00000000    
   0.00000000    
   0.00000000    
   0.00000000    
   0.00000000    
   0.00000000    
   0.00000000    
   0.00000000    
   0.00000000    
   0.00000000    
   0.00000000    
   0.00000000    
   0.00000000    
   0.00000000    
   0.00000000    
   0.00000000    
   0.00000000    
   0.00000000    
   0.00000000    
   0.00000000    
   0.00000000    
   0.00000000    
   0.00000000    
   0.00000000    
   0.00000000    
   0.00000000    
   0.00000000    
   0.00000000    
   0.00000000    
   0.00000000    
   0.00000000    
   0.00000000    
   0.00000000    
   0.00000000    
   0.00000000    
   0.00000000    
   0.00000000    
   0.00000000    
   0.00000000    
   0.00000000    
   0.00000000    
   0.00000000    
   0.00000000    
   0.00000000    
   0.00000000    
   0.00000000    
   0.00000000    
   0.00000000    
   0.00000000    
   0.00000000    
   0.00000000    
   0.00000000    
   0.00000000    
   0.00000000    
   0.00000000    
   0.00000000    
   0.00000000    
   0.00000000    
   0.00000000    
   0.00000000    
   0.00000000    
   0.00000000    
   0.00000000    
   0.00000000    
   0.00000000    
   0.00000000    
   0.00000000    
   0.00000000    
   0.00000000    
   0.00000000    
   0.00000000    
   0.00000000    
   0.00000000    
   0.00000000    
   0.00000000    
   0.00000000    
   0.00000000    
   0.00000000    
   0.00000000    
   0.00000000    
   0.00000000    
   0.00000000    
   0.00000000    
   0.00000000    
   0.00000000    
   0.00000000    
   0.00000000    
   0.00000000    
   0.00000000    
   0.00000000    
   0.00000000    
   0.00000000    
   0.00000000    
   0.00000000    
   0.00000000    
   0.00000000    
   0.00000000    
   0.00000000    
   0.00000000    
   0.00000000    
   0.00000000    
   0.00000000    
   0.00000000    
   0.00000000    
   0.00000000    
   0.00000000    
   0.00000000    
   0.00000000    
   0.00000000    
   0.00000000    
   0.00000000    
   0.00000000    
   0.00000000    
   0.00000000    
   0.00000000    
   0.00000000    
   0.00000000    
   0.00000000    
   0.00000000    
   0.00000000    
   0.00000000    
   0.00000000    
   0.00000000    
   0.00000000    
   0.00000000    
   0.00000000    
   0.00000000    
   0.00000000    
   0.00000000    
   0.00000000    
   0.00000000    
   0.00000000    
   0.00000000    
   0.00000000    
   0.00000000    
   0.00000000    
   0.00000000    
   0.00000000    
   0.00000000    
   0.00000000    
   0.00000000    
   0.00000000    
   0.00000000    
   0.00000000    
   0.00000000    
   0.00000000    
   0.00000000    
   0.00000000    
   0.00000000    
   0.00000000    
   0.00000000    
   0.00000000    
   0.00000000    
   0.00000000    
   0.00000000    
   0.00000000    
   0.00000000    
   0.00000000    
   0.00000000    
   0.00000000    
   0.00000000    
   0.00000000    
   0.00000000    
   0.00000000    
   0.00000000    
   0.00000000    
   0.00000000    
   0.00000000    
   0.00000000    
   0.00000000    
   0.00000000    
   0.00000000    
   0.00000000    
   0.00000000    
   0.00000000    
   0.00000000    
   0.00000000    
   0.00000000    
   0.00000000    
   0.00000000    
   0.00000000    
   0.00000000    
   0.00000000    
   0.00000000    
   0.00000000    
   0.00000000    
   0.00000000    
   0.00000000    
   0.00000000    
   0.00000000    
   0.00000000    
   0.00000000    
   0.00000000    
   0.00000000    
   0.00000000    
   0.00000000    
   0.00000000    
   0.00000000    
   0.00000000    
   0.00000000    
   0.00000000    
   0.00000000    
   0.00000000    
   0.00000000    
   0.00000000    
   0.00000000    
   0.00000000    
   0.00000000    
   0.00000000    
   0.00000000    
   0.00000000    
   0.00000000    
   0.00000000    
   0.00000000    
   0.00000000    
   0.00000000    
   0.00000000    
   0.00000000    
   0.00000000    
   0.00000000    
   0.00000000    
   0.00000000    
   0.00000000    
   0.00000000    
   0.00000000    
   0.00000000    
   0.00000000    
   0.00000000    
   0.00000000    
   0.00000000    
   0.00000000    
   0.00000000    
   0.00000000    
   0.00000000    
   0.00000000    
   0.00000000    
   0.00000000    
   0.00000000    
   0.00000000    
   0.00000000    
   0.00000000    
   0.00000000    
   0.00000000    
   0.00000000    
   0.00000000    
   0.00000000    
   0.00000000    
   0.00000000    
   0.00000000    
   0.00000000    
   0.00000000    
   0.00000000    
   0.00000000    
   0.00000000    
   0.00000000    
   0.00000000    
   0.00000000    
   0.00000000    
   0.00000000    
   0.00000000    
   0.00000000    
   0.00000000    
   0.00000000    
   0.00000000    
   0.00000000    
   0.00000000    
   0.00000000    
   0.00000000    
   0.00000000    
   0.00000000    
   0.00000000    
   0.00000000    
   0.00000000    
   0.00000000    
   0.00000000    
   0.00000000    
   0.00000000    
   0.00000000    
   0.00000000    
   0.00000000    
   0.00000000    
   0.00000000    
   0.00000000    
   0.00000000    
   0.00000000    
   0.00000000    
   0.00000000    
   0.00000000    
   0.00000000    
   0.00000000    
   0.00000000    
   0.00000000    
   0.00000000    
   0.00000000    
   0.00000000    
   0.00000000    
   0.00000000    
   0.00000000    
   0.00000000    
   0.00000000    
   0.00000000    
   0.00000000    
   0.00000000    
   0.00000000    
   0.00000000    
   0.00000000    
   0.00000000    
   0.00000000    
   0.00000000    
   0.00000000    
   0.00000000    
   0.00000000    
   0.00000000    
   0.00000000    
   0.00000000    
   0.00000000    
   0.00000000    
   0.00000000    
   0.00000000    
   0.00000000    
   0.00000000    
   0.00000000    
   0.00000000    
   0.00000000    
   0.00000000    
   0.00000000    
   0.00000000    
   0.00000000    
   0.00000000    
   0.00000000    
   0.00000000    
   0.00000000    
   0.00000000    
   0.00000000    
   0.00000000    
   0.00000000    
   0.00000000    
   0.00000000    
   0.00000000    
   0.00000000    
   0.00000000    
   0.00000000    
   0.00000000    
   0.00000000    
   0.00000000    
   0.00000000    
   0.00000000    
   0.00000000    
   0.00000000    
   0.00000000    
   0.00000000    
   0.00000000    
   0.00000000    
   0.00000000    
   0.00000000    
   0.00000000    
   0.00000000    
   0.00000000    
   0.00000000    
   0.00000000    
   0.00000000    
   0.00000000    
   0.00000000    
   0.00000000    
   0.00000000    
   0.00000000    
   0.00000000    
   0.00000000    
   0.00000000    
   0.00000000    
   0.00000000    
   0.00000000    
   0.00000000    
   0.00000000    
   0.00000000    
   0.00000000    
   0.00000000    
   0.00000000    
   0.00000000    
   0.00000000    
   0.00000000    
   0.00000000    
   0.00000000    
   0.00000000    
   0.00000000    
   0.00000000    
   0.00000000    
   0.00000000    
   0.00000000    
   0.00000000    
   0.00000000    
   0.00000000    
   0.00000000    
   0.00000000    
   0.00000000    
   0.00000000    
   0.00000000    
   0.00000000    
   0.00000000    
   0.00000000    
   0.00000000    
   0.00000000    
   0.00000000    
   0.00000000    
   0.00000000    
   0.00000000    
   0.00000000    
   0.00000000    
   0.00000000    
   0.00000000    
   0.00000000    
   0.00000000    
   0.00000000    
   0.00000000    
   0.00000000    
   0.00000000    
   0.00000000    
   0.00000000    
   0.00000000    
   0.00000000    
   0.00000000    
   0.00000000    
   0.00000000    
   0.00000000    
   0.00000000    
   0.00000000    
   0.00000000    
   0.00000000    
   0.00000000    
   0.00000000    
   0.00000000    
   0.00000000    
   0.00000000    
   0.00000000    
   0.00000000    
   0.00000000    
   0.00000000    
   0.00000000    
   0.00000000    
   0.00000000    
   0.00000000    
   0.00000000    
   0.00000000    
   0.00000000    
   0.00000000    
   0.00000000    
   0.00000000    
   0.00000000    
   0.00000000    
   0.00000000    
   0.00000000    
   0.00000000    
   0.00000000    
   0.00000000    
   0.00000000    
   0.00000000    
   0.00000000    
   0.00000000    
   0.00000000    
   0.00000000    
   0.00000000    
   0.00000000    
   0.00000000    
   0.00000000    
   0.00000000    
   0.00000000    
   0.00000000    
   0.00000000    
   0.00000000    
   0.00000000    
   0.00000000    
   0.00000000    
   0.00000000    
   0.00000000    
   0.00000000    
   0.00000000    
   0.00000000    
   0.00000000    
   0.00000000    
   0.00000000    
   0.00000000    
   0.00000000    
   0.00000000    
   0.00000000    
   0.00000000    
   0.00000000    
   0.00000000    
   0.00000000    
   0.00000000    
   0.00000000    
   0.00000000    
   0.00000000    
   0.00000000    
   0.00000000    
   0.00000000    
   0.00000000    
   0.00000000    
   0.00000000    
   0.00000000    
   0.00000000    
   0.00000000    
   0.00000000    
   0.00000000    
   0.00000000    
   0.00000000    
   0.00000000    
   0.00000000    
   0.00000000    
   0.00000000    
   0.00000000    
   0.00000000    
   0.00000000    
   0.00000000    
   0.00000000    
   0.00000000    
   0.00000000    
   0.00000000    
   0.00000000    
   0.00000000    
   0.00000000    
   0.00000000    
   0.00000000    
   0.00000000    
   0.00000000    
   0.00000000    
   0.00000000    
   0.00000000    
   0.00000000    
   0.00000000    
   0.00000000    
   0.00000000    
   0.00000000    
   0.00000000    
   0.00000000    
   0.00000000    
   0.00000000    
   0.00000000    
   0.00000000    
   0.00000000    
   0.00000000    
   0.00000000    
   0.00000000    
   0.00000000    
   0.00000000    
   0.00000000    
   0.00000000    
   0.00000000    
   0.00000000    
   0.00000000    
   0.00000000    
   0.00000000    
   0.00000000    
   0.00000000    
   0.00000000    
   0.00000000    
   0.00000000    
   0.00000000    
   0.00000000    
   0.00000000    
   0.00000000    
   0.00000000    
   0.00000000    
   0.00000000    
   0.00000000    
   0.00000000    
   0.00000000    
   0.00000000    
   0.00000000    
   0.00000000    
   0.00000000    
   0.00000000    
   0.00000000    
   0.00000000    
   0.00000000    
   0.00000000    
   0.00000000    
   0.00000000    
   0.00000000    
   0.00000000    
   0.00000000    
   0.00000000    
   0.00000000    
   0.00000000    
   0.00000000    
   0.00000000    
   0.00000000    
   0.00000000    
   0.00000000    
   0.00000000    
   0.00000000    
   0.00000000    
   0.00000000    
   0.00000000    
   0.00000000    
   0.00000000    
   0.00000000    
   0.00000000    
   0.00000000    
   0.00000000    
   0.00000000    
   0.00000000    
   0.00000000    
   0.00000000    
   0.00000000    
   0.00000000    
   0.00000000    
   0.00000000    
   0.00000000    
   0.00000000    
   0.00000000    
   0.00000000    
   0.00000000    
   0.00000000    
   0.00000000    
   0.00000000    
   0.00000000    
   0.00000000    
   0.00000000    
   0.00000000    
   0.00000000    
   0.00000000    
   0.00000000    
   0.00000000    
   0.00000000    
   0.00000000    
   0.00000000    
   0.00000000    
   0.00000000    
   0.00000000    
   0.00000000    
   0.00000000    
   0.00000000    
   0.00000000    
   0.00000000    
   0.00000000    
   0.00000000    
   0.00000000    
   0.00000000    
   0.00000000    
   0.00000000    
   0.00000000    
   0.00000000    
   0.00000000    
   0.00000000    
   0.00000000    
   0.00000000    
   0.00000000    
   0.00000000    
   0.00000000    
   0.00000000    
   0.00000000    
   0.00000000    
   0.00000000    
   0.00000000    
   0.00000000    
   0.00000000    
   0.00000000    
   0.00000000    
   0.00000000    
   0.00000000    
   0.00000000    
   0.00000000    
   0.00000000    
   0.00000000    
   0.00000000    
   0.00000000    
   0.00000000    
   0.00000000    
   0.00000000    
   0.00000000    
   0.00000000    
   0.00000000    
   0.00000000    
   0.00000000    
   0.00000000    
   0.00000000    
   0.00000000    
   0.00000000    
   0.00000000    
   0.00000000    
   0.00000000    
   0.00000000    
   0.00000000    
   0.00000000    
   0.00000000    
   0.00000000    
   0.00000000    
   0.00000000    
   0.00000000    
   0.00000000    
   0.00000000    
   0.00000000    
   0.00000000    
   0.00000000    
   0.00000000    
   0.00000000    
   0.00000000    
   0.00000000    
   0.00000000    
   0.00000000    
   0.00000000    
   0.00000000    
   0.00000000    
   0.00000000    
   0.00000000    
   0.00000000    
   0.00000000    
   0.00000000    
   0.00000000    
   0.00000000    
   0.00000000    
   0.00000000    
   0.00000000    
   0.00000000    
   0.00000000    
   0.00000000    
   0.00000000    
   0.00000000    
   0.00000000    
   0.00000000    
   0.00000000    
   0.00000000    
   0.00000000    
   0.00000000    
   0.00000000    
   0.00000000    
   0.00000000    
   0.00000000    
   0.00000000    
   0.00000000    
   0.00000000    
   0.00000000    
   0.00000000    
   0.00000000    
   0.00000000    
   0.00000000    
   0.00000000    
   0.00000000    
   0.00000000    
   0.00000000    
   0.00000000    
   0.00000000    
   0.00000000    
   0.00000000    
   0.00000000    
   0.00000000    
   0.00000000    
   0.00000000    
   0.00000000    
   0.00000000    
   0.00000000    
   0.00000000    
   0.00000000    
   0.00000000    
   0.00000000    
   0.00000000    
   0.00000000    
   0.00000000    
   0.00000000    
   0.00000000    
   0.00000000    
   0.00000000    
   0.00000000    
   0.00000000    
   0.00000000    
   0.00000000    
   0.00000000    
   0.00000000    
   0.00000000    
   0.00000000    
   0.00000000    
   0.00000000    
   0.00000000    
   0.00000000    
   0.00000000    
   0.00000000    
   0.00000000    
   0.00000000    
   0.00000000    
   0.00000000    
   0.00000000    
   0.00000000    
   0.00000000    
   0.00000000    
   0.00000000    
   0.00000000    
   0.00000000    
   0.00000000    
   0.00000000    
   0.00000000    
   0.00000000    
   0.00000000    
   0.00000000    
   0.00000000    
   0.00000000    
   0.00000000    
   0.00000000    
   0.00000000    
   0.00000000    
   0.00000000    
   0.00000000    
   0.00000000    
   0.00000000    
   0.00000000    
   0.00000000    
   0.00000000    
   0.00000000    
   0.00000000    
   0.00000000    
   0.00000000    
   0.00000000    
   0.00000000    
   0.00000000    
   0.00000000    
   0.00000000    
   0.00000000    
   0.00000000    
   0.00000000    
   0.00000000    
   0.00000000    
   0.00000000    
   0.00000000    
   0.00000000    
   0.00000000    
   0.00000000    
   0.00000000    
   0.00000000    
   0.00000000    
   0.00000000    
   0.00000000    
   0.00000000    
   0.00000000    
   0.00000000    
   0.00000000    
   0.00000000    
   0.00000000    
   0.00000000    
   0.00000000    
   0.00000000    
   0.00000000    
   0.00000000    
   0.00000000    
   0.00000000    
   0.00000000    
   0.00000000    
   0.00000000    
   0.00000000    
   0.00000000    
   0.00000000    
   0.00000000    
   0.00000000    
   0.00000000    
   0.00000000    
   0.00000000    
   0.00000000    
   0.00000000    
   0.00000000    
   0.00000000    
   0.00000000    
   0.00000000    
   0.00000000    
   0.00000000    
   0.00000000    
   0.00000000    
   0.00000000    
   0.00000000    
   0.00000000    
   0.00000000    
   0.00000000    
   0.00000000    
   0.00000000    
   0.00000000    
   0.00000000    
   0.00000000    
   0.00000000    
   0.00000000    
   0.00000000    
   0.00000000    
   0.00000000    
   0.00000000    
   0.00000000    
   0.00000000    
   0.00000000    
   0.00000000    
   0.00000000    
   0.00000000    
   0.00000000    
   0.00000000    
   0.00000000    
   0.00000000    
   0.00000000    
   0.00000000    
   0.00000000    
   0.00000000    
   0.00000000    
   0.00000000    
   0.00000000    
   0.00000000    
   0.00000000    
   0.00000000    
   0.00000000    
   0.00000000    
   0.00000000    
   0.00000000    
   0.00000000    
   0.00000000    
   0.00000000    
   0.00000000    
   0.00000000    
   0.00000000    
   0.00000000    
   0.00000000    
   0.00000000    
   0.00000000    
   0.00000000    
   0.00000000    
   0.00000000    
   0.00000000    
   0.00000000    
   0.00000000    
   0.00000000    
   0.00000000    
   0.00000000    
   0.00000000    
   0.00000000    
   0.00000000    
   0.00000000    
   0.00000000    
   0.00000000    
   0.00000000    
   0.00000000    
   0.00000000    
   0.00000000    
   0.00000000    
   0.00000000    
   0.00000000    
   0.00000000    
   0.00000000    
   0.00000000    
   0.00000000    
   0.00000000    
   0.00000000    
   0.00000000    
   0.00000000    
   0.00000000    
   0.00000000    
   0.00000000    
   0.00000000    
   0.00000000    
   0.00000000    
   0.00000000    
   0.00000000    
   0.00000000    
   0.00000000    
   0.00000000    
   0.00000000    
   0.00000000    
   0.00000000    
   0.00000000    
   0.00000000    
   0.00000000    
   0.00000000    
   0.00000000    
   0.00000000    
   0.00000000    
   0.00000000    
   0.00000000    
   0.00000000    
   0.00000000    
   0.00000000    
   0.00000000    
   0.00000000    
   0.00000000    
   0.00000000    
   0.00000000    
   0.00000000    
   0.00000000    
   0.00000000    
   0.00000000    
   0.00000000    
   0.00000000    
   0.00000000    
   0.00000000    
   0.00000000    
   0.00000000    
   0.00000000    
   0.00000000    
   0.00000000    
   0.00000000    
   0.00000000    
   0.00000000    
   0.00000000    
   0.00000000    
   0.00000000    
   0.00000000    
   0.00000000    
   0.00000000    
   0.00000000    
   0.00000000    
   0.00000000    
   0.00000000    
   0.00000000    
   0.00000000    
   0.00000000    
   0.00000000    
   0.00000000    
   0.00000000    
   0.00000000    
   0.00000000    
   0.00000000    
   0.00000000    
   0.00000000    
   0.00000000    
   0.00000000    
   0.00000000    
   0.00000000    
   0.00000000    
   0.00000000    
   0.00000000    
   0.00000000    
   0.00000000    
   0.00000000    
   0.00000000    
   0.00000000    
   0.00000000    
   0.00000000    
   0.00000000    
   0.00000000    
   0.00000000    
   0.00000000    
   0.00000000    
   0.00000000    
   0.00000000    
   0.00000000    
   0.00000000    
   0.00000000    
   0.00000000    
   0.00000000    
   0.00000000    
   0.00000000    
   0.00000000    
   0.00000000    
   0.00000000    
   0.00000000    
   0.00000000    
   0.00000000    
   0.00000000    
   0.00000000    
   0.00000000    
   0.00000000    
   0.00000000    
   0.00000000    
   0.00000000    
   0.00000000    
   0.00000000    
   0.00000000    
   0.00000000    
   0.00000000    
   0.00000000    
   0.00000000    
   0.00000000    
   0.00000000    
   0.00000000    
   0.00000000    
   0.00000000    
   0.00000000    
   0.00000000    
   0.00000000    
   0.00000000    
   0.00000000    
   0.00000000    
   0.00000000    
   0.00000000    
   0.00000000    
   0.00000000    
   0.00000000    
   0.00000000    
   0.00000000    
   0.00000000    
   0.00000000    
   0.00000000    
   0.00000000    
   0.00000000    
   0.00000000    
   0.00000000    
   0.00000000    
   0.00000000    
   0.00000000    
   0.00000000    
   0.00000000    
   0.00000000    
   0.00000000    
   0.00000000    
   0.00000000    
   0.00000000    
   0.00000000    
   0.00000000    
   0.00000000    
   0.00000000    
   0.00000000    
   0.00000000    
   0.00000000    
   0.00000000    
   0.00000000    
   0.00000000    
   0.00000000    
   0.00000000    
   0.00000000    
   0.00000000    
   0.00000000    
   0.00000000    
   0.00000000    
   0.00000000    
   0.00000000    
   0.00000000    
   0.00000000    
   0.00000000    
   0.00000000    
   0.00000000    
   0.00000000    
   0.00000000    
   0.00000000    
   0.00000000    
   0.00000000    
   0.00000000    
   0.00000000    
   0.00000000    
   0.00000000    
   0.00000000    
   0.00000000    
   0.00000000    
   0.00000000    
   0.00000000    
   0.00000000    
   0.00000000    
   0.00000000    
   0.00000000    
   0.00000000    
   0.00000000    
   0.00000000    
   0.00000000    
   0.00000000    
   0.00000000    
   0.00000000    
   0.00000000    
   0.00000000    
   0.00000000    
   0.00000000    
   0.00000000    
   0.00000000    
   0.00000000    
   0.00000000    
   0.00000000    
   0.00000000    
   0.00000000    
   0.00000000    
   0.00000000    
   0.00000000    
   0.00000000    
   0.00000000    
   0.00000000    
   0.00000000    
   0.00000000    
   0.00000000    
   0.00000000    
   0.00000000    
   0.00000000    
   0.00000000    
   0.00000000    
   0.00000000    
   0.00000000    
   0.00000000    
   0.00000000    
   0.00000000    
   0.00000000    
   0.00000000    
   0.00000000    
   0.00000000    
   0.00000000    
   0.00000000    
   0.00000000    
   0.00000000    
   0.00000000    
   0.00000000    
   0.00000000    
   0.00000000    
   0.00000000    
   0.00000000    
   0.00000000    
   0.00000000    
   0.00000000    
   0.00000000    
   0.00000000    
   0.00000000    
   0.00000000    
   0.00000000    
   0.00000000    
   0.00000000    
   0.00000000    
   0.00000000    
   0.00000000    
   0.00000000    
   0.00000000    
   0.00000000    
   0.00000000    
   0.00000000    
   0.00000000    
   0.00000000    
   0.00000000    
   0.00000000    
   0.00000000    
   0.00000000    
   0.00000000    
   0.00000000    
   0.00000000    
   0.00000000    
   0.00000000    
   0.00000000    
   0.00000000    
   0.00000000    
   0.00000000    
   0.00000000    
   0.00000000    
   0.00000000    
   0.00000000    
   0.00000000    
   0.00000000    
   0.00000000    
   0.00000000    
   0.00000000    
   0.00000000    
   0.00000000    
   0.00000000    
   0.00000000    
   0.00000000    
   0.00000000    
   0.00000000    
   0.00000000    
   0.00000000    
   0.00000000    
   0.00000000    
   0.00000000    
   0.00000000    
   0.00000000    
   0.00000000    
   0.00000000    
   0.00000000    
   0.00000000    
   0.00000000    
   0.00000000    
   0.00000000    
   0.00000000    
   0.00000000    
   0.00000000    
   0.00000000    
   0.00000000    
   0.00000000    
   0.00000000    
   0.00000000    
   0.00000000    
   0.00000000    
   0.00000000    
   0.00000000    
   0.00000000    
   0.00000000    
   0.00000000    
   0.00000000    
   0.00000000    
   0.00000000    
   0.00000000    
   0.00000000    
   0.00000000    
   0.00000000    
   0.00000000    
   0.00000000    
   0.00000000    
   0.00000000    
   0.00000000    
   0.00000000    
   0.00000000    
   0.00000000    
   0.00000000    
   0.00000000    
   0.00000000    
   0.00000000    
   0.00000000    
   0.00000000    
   0.00000000    
   0.00000000    
   0.00000000    
   0.00000000    
   0.00000000    
   0.00000000    
   0.00000000    
   0.00000000    
   0.00000000    
   0.00000000    
   0.00000000    
   0.00000000    
   0.00000000    
   0.00000000    
   0.00000000    
   0.00000000    
   0.00000000    
   0.00000000    
   0.00000000    
   0.00000000    
   0.00000000    
   0.00000000    
   0.00000000    
   0.00000000    
   0.00000000    
   0.00000000    
   0.00000000    
   0.00000000    
   0.00000000    
   0.00000000    
   0.00000000    
   0.00000000    
   0.00000000    
   0.00000000    
   0.00000000    
   0.00000000    
   0.00000000    
   0.00000000    
   0.00000000    
   0.00000000    
   0.00000000    
   0.00000000    
   0.00000000    
   0.00000000    
   0.00000000    
   0.00000000    
   0.00000000    
   0.00000000    
   0.00000000    
   0.00000000    
   0.00000000    
   0.00000000    
   0.00000000    
   0.00000000    
   0.00000000    
   0.00000000    
   0.00000000    
   0.00000000    
   0.00000000    
   0.00000000    
   0.00000000    
   0.00000000    
   0.00000000    
   0.00000000    
   0.00000000    
   0.00000000    
   0.00000000    
   0.00000000    
   0.00000000    
   0.00000000    
   0.00000000    
   0.00000000    
   0.00000000    
   0.00000000    
   0.00000000    
   0.00000000    
   0.00000000    
   0.00000000    
   0.00000000    
   0.00000000    
   0.00000000    
   0.00000000    
   0.00000000    
   0.00000000    
   0.00000000    
   0.00000000    
   0.00000000    
   0.00000000    
   0.00000000    
   0.00000000    
   0.00000000    
   0.00000000    
   0.00000000    
   0.00000000    
   0.00000000    
   0.00000000    
   0.00000000    
   0.00000000    
   0.00000000    
   0.00000000    
   0.00000000    
   0.00000000    
   0.00000000    
   0.00000000    
   0.00000000    
   0.00000000    
   0.00000000    
   0.00000000    
   0.00000000    
   0.00000000    
   0.00000000    
   0.00000000    
   0.00000000    
   0.00000000    
   0.00000000    
   0.00000000    
   0.00000000    
   0.00000000    
   0.00000000    
   0.00000000    
   0.00000000    
   0.00000000    
   0.00000000    
   0.00000000    
   0.00000000    
   0.00000000    
   0.00000000    
   0.00000000    
   0.00000000    
   0.00000000    
   0.00000000    
   0.00000000    
   0.00000000    
   0.00000000    
   0.00000000    
   0.00000000    
   0.00000000    
   0.00000000    
   0.00000000    
   0.00000000    
   0.00000000    
   0.00000000    
   0.00000000    
   0.00000000    
   0.00000000    
   0.00000000    
   0.00000000    
   0.00000000    
   0.00000000    
   0.00000000    
   0.00000000    
   0.00000000    
   0.00000000    
   0.00000000    
   0.00000000    
   0.00000000    
   0.00000000    
   0.00000000    
   0.00000000    
   0.00000000    
   0.00000000    
   0.00000000    
   0.00000000    
   0.00000000    
   0.00000000    
   0.00000000    
   0.00000000    
   0.00000000    
   0.00000000    
   0.00000000    
   0.00000000    
   0.00000000    
   0.00000000    
   0.00000000    
   0.00000000    
   0.00000000    
   0.00000000    
   0.00000000    
   0.00000000    
   0.00000000    
   0.00000000    
   0.00000000    
   0.00000000    
   0.00000000    
   0.00000000    
   0.00000000    
   0.00000000    
   0.00000000    
   0.00000000    
   0.00000000    
   0.00000000    
   0.00000000    
   0.00000000    
   0.00000000    
   0.00000000    
   0.00000000    
   0.00000000    
   0.00000000    
   0.00000000    
   0.00000000    
   0.00000000    
   0.00000000    
   0.00000000    
   0.00000000    
   0.00000000    
   0.00000000    
   0.00000000    
   0.00000000    
   0.00000000    
   0.00000000    
   0.00000000    
   0.00000000    
   0.00000000    
   0.00000000    
   0.00000000    
   0.00000000    
   0.00000000    
   0.00000000    
   0.00000000    
   0.00000000    
   0.00000000    
   0.00000000    
   0.00000000    
   0.00000000    
   0.00000000    
   0.00000000    
   0.00000000    
   0.00000000    
   0.00000000    
   0.00000000    
   0.00000000    
   0.00000000    
   0.00000000    
   0.00000000    
   0.00000000    
   0.00000000    
   2.00000000    
   0.00000000    
   0.00000000    
   1.00000000    
   0.00000000    
   2.00000000    
   0.00000000    
   2.00000000    
   1.00000000    
   1.00000000    
   3.00000000    
   0.00000000    
   0.00000000    
   0.00000000    
   0.00000000    
   0.00000000    
   0.00000000    
   0.00000000    
   0.00000000    
   0.00000000    
   0.00000000    
   0.00000000    
   0.00000000    
   0.00000000    
   0.00000000    
   0.00000000    
   0.00000000    
   0.00000000    
   0.00000000    
   0.00000000    
   0.00000000    
   0.00000000    
   0.00000000    
   0.00000000    
   0.00000000    
   0.00000000    
   0.00000000    
   0.00000000    
   0.00000000    
   0.00000000    
   0.00000000    
   0.00000000    
   0.00000000    
   0.00000000    
   0.00000000    
   0.00000000    
   0.00000000    
   0.00000000    
   0.00000000    
   0.00000000    
   0.00000000    
   0.00000000    
   0.00000000    
   0.00000000    
   0.00000000    
   0.00000000    
   0.00000000    
   0.00000000    
   1.00000000    
   2.00000000    
   1.00000000    
   0.00000000    
   1.00000000    
   0.00000000    
   1.00000000    
   1.00000000    
   0.00000000    
   0.00000000    
   1.00000000    
   0.00000000    
   0.00000000    
   3.00000000    
   0.00000000    
   0.00000000    
   0.00000000    
   0.00000000    
   0.00000000    
   0.00000000    
   1.00000000    
   0.00000000    
   0.00000000    
   0.00000000    
   0.00000000    
   0.00000000    
   0.00000000    
   0.00000000    
   0.00000000    
   0.00000000    
   0.00000000    
   0.00000000    
   0.00000000    
   0.00000000    
   0.00000000    
   0.00000000    
   0.00000000    
   0.00000000    
   0.00000000    
   0.00000000    
   0.00000000    
   0.00000000    
   0.00000000    
   0.00000000    
   0.00000000    
   0.00000000    
   0.00000000    
   0.00000000    
   0.00000000    
   0.00000000    
   0.00000000    
   0.00000000    
   0.00000000    
   0.00000000    
   0.00000000    
   0.00000000    
   0.00000000    
   0.00000000    
   0.00000000    
   0.00000000    
   0.00000000    
   0.00000000    
   0.00000000    
   0.00000000    
   1.00000000    
   4.00000000    
   3.00000000    
   1.00000000    
   2.00000000    
   0.00000000    
   2.00000000    
   3.00000000    
   0.00000000    
   1.00000000    
   1.00000000    
   1.00000000    
   3.00000000    
   2.00000000    
   0.00000000    
   2.00000000    
   0.00000000    
   0.00000000    
   2.00000000    
   0.00000000    
   0.00000000    
   0.00000000    
   0.00000000    
   0.00000000    
   0.00000000    
   0.00000000    
   0.00000000    
   0.00000000    
   0.00000000    
   0.00000000    
   0.00000000    
   0.00000000    
   0.00000000    
   0.00000000    
   0.00000000    
   0.00000000    
   0.00000000    
   0.00000000    
   0.00000000    
   0.00000000    
   0.00000000    
   0.00000000    
   0.00000000    
   0.00000000    
   0.00000000    
   0.00000000    
   0.00000000    
   0.00000000    
   0.00000000    
   0.00000000    
   0.00000000    
   0.00000000    
   0.00000000    
   0.00000000    
   0.00000000    
   0.00000000    
   0.00000000    
   0.00000000    
   0.00000000    
   0.00000000    
   0.00000000    
   0.00000000    
   0.00000000    
   3.00000000    
   4.00000000    
   2.00000000    
   1.00000000    
   0.00000000    
   1.00000000    
   1.00000000    
   1.00000000    
   1.00000000    
   1.00000000    
   1.00000000    
   1.00000000    
   3.00000000    
   3.00000000    
   2.00000000    
   1.00000000    
   0.00000000    
   1.00000000    
   1.00000000    
   1.00000000    
   0.00000000    
   1.00000000    
   1.00000000    
   2.00000000    
   0.00000000    
   0.00000000    
   0.00000000    
   0.00000000    
   0.00000000    
   0.00000000    
   0.00000000    
   0.00000000    
   0.00000000    
   0.00000000    
   0.00000000    
   0.00000000    
   0.00000000    
   0.00000000    
   0.00000000    
   0.00000000    
   0.00000000    
   0.00000000    
   0.00000000    
   0.00000000    
   0.00000000    
   0.00000000    
   0.00000000    
   0.00000000    
   0.00000000    
   0.00000000    
   0.00000000    
   0.00000000    
   0.00000000    
   0.00000000    
   0.00000000    
   0.00000000    
   0.00000000    
   0.00000000    
   0.00000000    
   0.00000000    
   0.00000000    
   0.00000000    
   0.00000000    
   2.00000000    
   3.00000000    
   2.00000000    
   4.00000000    
   2.00000000    
   0.00000000    
   1.00000000    
   2.00000000    
   0.00000000    
   0.00000000    
   2.00000000    
   0.00000000    
   0.00000000    
   2.00000000    
   1.00000000    
   0.00000000    
   2.00000000    
   1.00000000    
   2.00000000    
   0.00000000    
   2.00000000    
   2.00000000    
   2.00000000    
   0.00000000    
   2.00000000    
   0.00000000    
   0.00000000    
   0.00000000    
   0.00000000    
   0.00000000    
   0.00000000    
   0.00000000    
   0.00000000    
   0.00000000    
   0.00000000    
   0.00000000    
   0.00000000    
   0.00000000    
   0.00000000    
   0.00000000    
   0.00000000    
   0.00000000    
   0.00000000    
   0.00000000    
   0.00000000    
   0.00000000    
   0.00000000    
   0.00000000    
   0.00000000    
   0.00000000    
   0.00000000    
   0.00000000    
   0.00000000    
   0.00000000    
   0.00000000    
   0.00000000    
   0.00000000    
   0.00000000    
   0.00000000    
   0.00000000    
   0.00000000    
   0.00000000    
   0.00000000    
   0.00000000    
   0.00000000    
   1.00000000    
   1.00000000    
   3.00000000    
   1.00000000    
   0.00000000    
   1.00000000    
   0.00000000    
   1.00000000    
   1.00000000    
   2.00000000    
   0.00000000    
   3.00000000    
   4.00000000    
   1.00000000    
   0.00000000    
   2.00000000    
   0.00000000    
   0.00000000    
   1.00000000    
   0.00000000    
   1.00000000    
   0.00000000    
   0.00000000    
   0.00000000    
   2.00000000    
   0.00000000    
   0.00000000    
   0.00000000    
   0.00000000    
   0.00000000    
   0.00000000    
   0.00000000    
   0.00000000    
   0.00000000    
   0.00000000    
   0.00000000    
   0.00000000    
   0.00000000    
   0.00000000    
   0.00000000    
   0.00000000    
   0.00000000    
   0.00000000    
   0.00000000    
   0.00000000    
   0.00000000    
   0.00000000    
   0.00000000    
   0.00000000    
   0.00000000    
   0.00000000    
   0.00000000    
   0.00000000    
   0.00000000    
   0.00000000    
   0.00000000    
   0.00000000    
   0.00000000    
   0.00000000    
   0.00000000    
   0.00000000    
   0.00000000    
   2.00000000    
   0.00000000    
   1.00000000    
   0.00000000    
   2.00000000    
   2.00000000    
   1.00000000    
   3.00000000    
   1.00000000    
   1.00000000    
   3.00000000    
   0.00000000    
   0.00000000    
   0.00000000    
   1.00000000    
   3.00000000    
   4.00000000    
   1.00000000    
   0.00000000    
   0.00000000    
   0.00000000    
   2.00000000    
   2.00000000    
   0.00000000    
   1.00000000    
   1.00000000    
   0.00000000    
   0.00000000    
   0.00000000    
   0.00000000    
   0.00000000    
   0.00000000    
   0.00000000    
   0.00000000    
   0.00000000    
   0.00000000    
   0.00000000    
   0.00000000    
   0.00000000    
   0.00000000    
   0.00000000    
   0.00000000    
   0.00000000    
   0.00000000    
   0.00000000    
   0.00000000    
   0.00000000    
   0.00000000    
   0.00000000    
   0.00000000    
   0.00000000    
   0.00000000    
   0.00000000    
   0.00000000    
   0.00000000    
   0.00000000    
   0.00000000    
   0.00000000    
   0.00000000    
   0.00000000    
   0.00000000    
   0.00000000    
   0.00000000    
   0.00000000    
   0.00000000    
   2.00000000    
   6.00000000    
   1.00000000    
   1.00000000    
   1.00000000    
   0.00000000    
   3.00000000    
   2.00000000    
   1.00000000    
   1.00000000    
   2.00000000    
   2.00000000    
   2.00000000    
   0.00000000    
   2.00000000    
   0.00000000    
   0.00000000    
   3.00000000    
   1.00000000    
   3.00000000    
   1.00000000    
   2.00000000    
   1.00000000    
   3.00000000    
   0.00000000    
   0.00000000    
   0.00000000    
   0.00000000    
   0.00000000    
   0.00000000    
   0.00000000    
   0.00000000    
   0.00000000    
   0.00000000    
   0.00000000    
   0.00000000    
   0.00000000    
   0.00000000    
   0.00000000    
   0.00000000    
   0.00000000    
   0.00000000    
   0.00000000    
   0.00000000    
   0.00000000    
   0.00000000    
   0.00000000    
   0.00000000    
   0.00000000    
   0.00000000    
   0.00000000    
   0.00000000    
   0.00000000    
   0.00000000    
   0.00000000    
   0.00000000    
   0.00000000    
   0.00000000    
   0.00000000    
   1.00000000    
   0.00000000    
   0.00000000    
   1.00000000    
   3.00000000    
   0.00000000    
   1.00000000    
   1.00000000    
   1.00000000    
   2.00000000    
   0.00000000    
   2.00000000    
   0.00000000    
   2.00000000    
   1.00000000    
   1.00000000    
   3.00000000    
   0.00000000    
   2.00000000    
   3.00000000    
   0.00000000    
   2.00000000    
   1.00000000    
   0.00000000    
   1.00000000    
   0.00000000    
   0.00000000    
   0.00000000    
   1.00000000    
   0.00000000    
   0.00000000    
   0.00000000    
   0.00000000    
   0.00000000    
   0.00000000    
   0.00000000    
   0.00000000    
   0.00000000    
   0.00000000    
   0.00000000    
   0.00000000    
   0.00000000    
   0.00000000    
   0.00000000    
   0.00000000    
   0.00000000    
   0.00000000    
   0.00000000    
   0.00000000    
   0.00000000    
   0.00000000    
   0.00000000    
   0.00000000    
   0.00000000    
   0.00000000    
   0.00000000    
   0.00000000    
   0.00000000    
   0.00000000    
   0.00000000    
   0.00000000    
   0.00000000    
   0.00000000    
   0.00000000    
   0.00000000    
   0.00000000    
   0.00000000    
   0.00000000    
   1.00000000    
   0.00000000    
   2.00000000    
   3.00000000    
   1.00000000    
   1.00000000    
   0.00000000    
   4.00000000    
   2.00000000    
   2.00000000    
   1.00000000    
   1.00000000    
   2.00000000    
   0.00000000    
   0.00000000    
   3.00000000    
   2.00000000    
   1.00000000    
   4.00000000    
   1.00000000    
   0.00000000    
   4.00000000    
   0.00000000    
   2.00000000    
   0.00000000    
   0.00000000    
   0.00000000    
   0.00000000    
   0.00000000    
   0.00000000    
   0.00000000    
   0.00000000    
   0.00000000    
   0.00000000    
   0.00000000    
   0.00000000    
   0.00000000    
   0.00000000    
   0.00000000    
   0.00000000    
   0.00000000    
   0.00000000    
   0.00000000    
   0.00000000    
   0.00000000    
   0.00000000    
   0.00000000    
   0.00000000    
   0.00000000    
   0.00000000    
   0.00000000    
   0.00000000    
   0.00000000    
   0.00000000    
   0.00000000    
   0.00000000    
   0.00000000    
   0.00000000    
   0.00000000    
   0.00000000    
   0.00000000    
   0.00000000    
   1.00000000    
   1.00000000    
   1.00000000    
   2.00000000    
   2.00000000    
   2.00000000    
   0.00000000    
   1.00000000    
   2.00000000    
   1.00000000    
   3.00000000    
   2.00000000    
   0.00000000    
   1.00000000    
   4.00000000    
   1.00000000    
   1.00000000    
   0.00000000    
   1.00000000    
   1.00000000    
   2.00000000    
   2.00000000    
   2.00000000    
   2.00000000    
   2.00000000    
   0.00000000    
   2.00000000    
   0.00000000    
   1.00000000    
   0.00000000    
   1.00000000    
   0.00000000    
   1.00000000    
   0.00000000    
   0.00000000    
   0.00000000    
   0.00000000    
   0.00000000    
   0.00000000    
   0.00000000    
   0.00000000    
   0.00000000    
   0.00000000    
   0.00000000    
   0.00000000    
   0.00000000    
   0.00000000    
   0.00000000    
   0.00000000    
   0.00000000    
   0.00000000    
   0.00000000    
   0.00000000    
   0.00000000    
   0.00000000    
   0.00000000    
   0.00000000    
   0.00000000    
   0.00000000    
   0.00000000    
   0.00000000    
   0.00000000    
   0.00000000    
   1.00000000    
   0.00000000    
   0.00000000    
   1.00000000    
   0.00000000    
   1.00000000    
   2.00000000    
   1.00000000    
   3.00000000    
   1.00000000    
   4.00000000    
   2.00000000    
   4.00000000    
   2.00000000    
   3.00000000    
   2.00000000    
   3.00000000    
   1.00000000    
   4.00000000
[truncated: 4,320,541 more chars]
