# Supplementary material
Source: MDPI journal article supplement (https://www.mdpi.com/2076-3417/11/1/54)
Supplement: s1 [file s1 › cube6p.cub]

 cube data
 Gaussian cube format
          28  -4.00000000      -4.00000000      -4.00000000    
          64  0.12500000000000000        0.00000000       0.00000000    
          64   0.00000000      0.12500000000000000        0.00000000    
          64   0.00000000       0.00000000      0.12500000000000000     
           8   0.00000000      -2.67221451       2.15519547       2.93595481    
           8   0.00000000     -0.150857836       3.30548668       2.81384969    
           8   0.00000000       3.07264663E-02   3.50958204      -3.19356585    
           8   0.00000000      -7.89826810E-02  -3.27234507       3.21959376    
           8   0.00000000      -1.06339121     -0.906540990       4.24952364    
           8   0.00000000      -1.32403719       4.21546173      -1.07749081    
           8   0.00000000       2.61586404       2.70156622      -2.78511286    
           8   0.00000000       2.52406502      -2.64349484       2.50556946    
           8   0.00000000      -3.39739609     -0.272558540       3.46245813    
           8   0.00000000      -3.27851224       2.97978806      0.347624898    
           8   0.00000000      0.471579641      -2.98107719      -2.88698339    
           8   0.00000000      0.976763785       4.35914326      0.509657025    
           8   0.00000000      0.682952583       1.12384617       3.92846775    
           8   0.00000000      -2.17443347      -2.59998918      -2.60004735    
           8   0.00000000       3.48375297       3.05174661     -0.221653044    
           8   0.00000000       2.97382474     -0.195622906       3.25772572    
           8   0.00000000       1.08624649     -0.871125042      -4.30358076    
           8   0.00000000      0.813717425      -4.26297855     -0.683062375    
           8   0.00000000      -3.12401533      -2.90898299     -0.111362614    
           8   0.00000000      -2.74329114      -1.79019728E-04  -3.00249314    
           8   0.00000000     -0.610557318       1.01267231      -4.06388330    
           8   0.00000000      -1.22077954      -4.45167017       1.15539110    
           8   0.00000000      -4.03520298      0.912742376     -0.834302068    
           8   0.00000000      -4.47385836     -0.809908390       1.07780242    
           8   0.00000000       3.30892587      0.243423417      -3.37782550    
           8   0.00000000       3.13695168      -3.10512662      -2.98819579E-02
           8   0.00000000       4.21240997     -0.925002038      -1.25701833    
           8   0.00000000       4.02974558      0.635947585      0.964641690    
   6.00000000    
   0.00000000    
   2.00000000    
   2.00000000    
   4.00000000    
   0.00000000    
   4.00000000    
   2.00000000    
   4.00000000    
   4.00000000    
   4.00000000    
   2.00000000    
   8.00000000    
   2.00000000    
   0.00000000    
   2.00000000    
   4.00000000    
   2.00000000    
   4.00000000    
   2.00000000    
   0.00000000    
   2.00000000    
   2.00000000    
   2.00000000    
   2.00000000    
   6.00000000    
   4.00000000    
   0.00000000    
   0.00000000    
   2.00000000    
   2.00000000    
   0.00000000    
   10.0000000    
   4.00000000    
   0.00000000    
   0.00000000    
   0.00000000    
   0.00000000    
   4.00000000    
   0.00000000    
   2.00000000    
   0.00000000    
   0.00000000    
   0.00000000    
   0.00000000    
   2.00000000    
   2.00000000    
   2.00000000    
   2.00000000    
   2.00000000    
   2.00000000    
   0.00000000    
   0.00000000    
   4.00000000    
   2.00000000    
   0.00000000    
   0.00000000    
   2.00000000    
   4.00000000    
   0.00000000    
   2.00000000    
   0.00000000    
   2.00000000    
   0.00000000    
   0.00000000    
   2.00000000    
   3.00000000    
   4.00000000    
   3.00000000    
   0.00000000    
   1.00000000    
   3.00000000    
   1.00000000    
   3.00000000    
   3.00000000    
   1.00000000    
   3.00000000    
   1.00000000    
   0.00000000    
   4.00000000    
   2.00000000    
   3.00000000    
   3.00000000    
   2.00000000    
   1.00000000    
   1.00000000    
   3.00000000    
   0.00000000    
   4.00000000    
   1.00000000    
   4.00000000    
   1.00000000    
   2.00000000    
   1.00000000    
   1.00000000    
   1.00000000    
   4.00000000    
   1.00000000    
   2.00000000    
   1.00000000    
   0.00000000    
   3.00000000    
   0.00000000    
   3.00000000    
   1.00000000    
   2.00000000    
   1.00000000    
   3.00000000    
   1.00000000    
   3.00000000    
   3.00000000    
   1.00000000    
   1.00000000    
   2.00000000    
   0.00000000    
   1.00000000    
   2.00000000    
   3.00000000    
   1.00000000    
   1.00000000    
   1.00000000    
   1.00000000    
   0.00000000    
   0.00000000    
   1.00000000    
   0.00000000    
   2.00000000    
   1.00000000    
   2.00000000    
   3.00000000    
   2.00000000    
   3.00000000    
   2.00000000    
   3.00000000    
   2.00000000    
   1.00000000    
   4.00000000    
   4.00000000    
   2.00000000    
   2.00000000    
   2.00000000    
   3.00000000    
   4.00000000    
   1.00000000    
   5.00000000    
   1.00000000    
   4.00000000    
   1.00000000    
   1.00000000    
   1.00000000    
   1.00000000    
   4.00000000    
   3.00000000    
   0.00000000    
   1.00000000    
   1.00000000    
   0.00000000    
   2.00000000    
   1.00000000    
   1.00000000    
   0.00000000    
   2.00000000    
   0.00000000    
   4.00000000    
   3.00000000    
   2.00000000    
   4.00000000    
   2.00000000    
   1.00000000    
   2.00000000    
   2.00000000    
   1.00000000    
   2.00000000    
   3.00000000    
   4.00000000    
   1.00000000    
   1.00000000    
   3.00000000    
   1.00000000    
   1.00000000    
   0.00000000    
   0.00000000    
   1.00000000    
   1.00000000    
   2.00000000    
   1.00000000    
   1.00000000    
   0.00000000    
   0.00000000    
   2.00000000    
   2.00000000    
   2.00000000    
   2.00000000    
   4.00000000    
   3.00000000    
   4.00000000    
   6.00000000    
   1.00000000    
   0.00000000    
   1.00000000    
   4.00000000    
   3.00000000    
   5.00000000    
   3.00000000    
   1.00000000    
   5.00000000    
   4.00000000    
   3.00000000    
   4.00000000    
   4.00000000    
   3.00000000    
   3.00000000    
   2.00000000    
   2.00000000    
   2.00000000    
   5.00000000    
   1.00000000    
   1.00000000    
   2.00000000    
   2.00000000    
   3.00000000    
   3.00000000    
   1.00000000    
   2.00000000    
   1.00000000    
   1.00000000    
   2.00000000    
   0.00000000    
   0.00000000    
   1.00000000    
   1.00000000    
   4.00000000    
   0.00000000    
   0.00000000    
   1.00000000    
   3.00000000    
   0.00000000    
   2.00000000    
   1.00000000    
   2.00000000    
   0.00000000    
   3.00000000    
   0.00000000    
   0.00000000    
   3.00000000    
   0.00000000    
   2.00000000    
   0.00000000    
   2.00000000    
   1.00000000    
   3.00000000    
   1.00000000    
   0.00000000    
   0.00000000    
   4.00000000    
   1.00000000    
   4.00000000    
   3.00000000    
   2.00000000    
   6.00000000    
   2.00000000    
   3.00000000    
   1.00000000    
   2.00000000    
   4.00000000    
   2.00000000    
   3.00000000    
   3.00000000    
   3.00000000    
   2.00000000    
   3.00000000    
   4.00000000    
   1.00000000    
   1.00000000    
   4.00000000    
   4.00000000    
   1.00000000    
   2.00000000    
   0.00000000    
   0.00000000    
   0.00000000    
   1.00000000    
   3.00000000    
   1.00000000    
   0.00000000    
   0.00000000    
   1.00000000    
   2.00000000    
   1.00000000    
   3.00000000    
   1.00000000    
   4.00000000    
   1.00000000    
   3.00000000    
   3.00000000    
   3.00000000    
   2.00000000    
   0.00000000    
   1.00000000    
   1.00000000    
   2.00000000    
   3.00000000    
   1.00000000    
   0.00000000    
   0.00000000    
   2.00000000    
   1.00000000    
   2.00000000    
   0.00000000    
   2.00000000    
   2.00000000    
   0.00000000    
   3.00000000    
   1.00000000    
   0.00000000    
   4.00000000    
   1.00000000    
   2.00000000    
   2.00000000    
   2.00000000    
   0.00000000    
   0.00000000    
   3.00000000    
   1.00000000    
   3.00000000    
   2.00000000    
   3.00000000    
   2.00000000    
   2.00000000    
   1.00000000    
   3.00000000    
   0.00000000    
   2.00000000    
   4.00000000    
   3.00000000    
   4.00000000    
   0.00000000    
   5.00000000    
   3.00000000    
   2.00000000    
   3.00000000    
   2.00000000    
   1.00000000    
   0.00000000    
   2.00000000    
   1.00000000    
   1.00000000    
   4.00000000    
   3.00000000    
   1.00000000    
   4.00000000    
   0.00000000    
   1.00000000    
   2.00000000    
   0.00000000    
   3.00000000    
   1.00000000    
   3.00000000    
   1.00000000    
   1.00000000    
   0.00000000    
   0.00000000    
   3.00000000    
   3.00000000    
   1.00000000    
   0.00000000    
   0.00000000    
   1.00000000    
   1.00000000    
   1.00000000    
   0.00000000    
   3.00000000    
   1.00000000    
   5.00000000    
   0.00000000    
   0.00000000    
   1.00000000    
   2.00000000    
   1.00000000    
   0.00000000    
   3.00000000    
   3.00000000    
   6.00000000    
   2.00000000    
   4.00000000    
   1.00000000    
   2.00000000    
   0.00000000    
   1.00000000    
   3.00000000    
   6.00000000    
   3.00000000    
   2.00000000    
   5.00000000    
   2.00000000    
   2.00000000    
   3.00000000    
   2.00000000    
   2.00000000    
   2.00000000    
   2.00000000    
   1.00000000    
   1.00000000    
   3.00000000    
   2.00000000    
   2.00000000    
   1.00000000    
   3.00000000    
   2.00000000    
   1.00000000    
   2.00000000    
   0.00000000    
   1.00000000    
   3.00000000    
   3.00000000    
   5.00000000    
   2.00000000    
   1.00000000    
   6.00000000    
   3.00000000    
   1.00000000    
   2.00000000    
   1.00000000    
   2.00000000    
   2.00000000    
   2.00000000    
   0.00000000    
   2.00000000    
   0.00000000    
   0.00000000    
   0.00000000    
   0.00000000    
   0.00000000    
   2.00000000    
   1.00000000    
   3.00000000    
   1.00000000    
   1.00000000    
   3.00000000    
   1.00000000    
   2.00000000    
   2.00000000    
   3.00000000    
   1.00000000    
   3.00000000    
   2.00000000    
   1.00000000    
   1.00000000    
   2.00000000    
   3.00000000    
   1.00000000    
   1.00000000    
   2.00000000    
   2.00000000    
   3.00000000    
   2.00000000    
   4.00000000    
   5.00000000    
   3.00000000    
   4.00000000    
   1.00000000    
   2.00000000    
   4.00000000    
   5.00000000    
   5.00000000    
   3.00000000    
   1.00000000    
   0.00000000    
   1.00000000    
   0.00000000    
   1.00000000    
   2.00000000    
   1.00000000    
   4.00000000    
   2.00000000    
   0.00000000    
   1.00000000    
   3.00000000    
   5.00000000    
   4.00000000    
   6.00000000    
   3.00000000    
   4.00000000    
   1.00000000    
   2.00000000    
   1.00000000    
   1.00000000    
   1.00000000    
   2.00000000    
   0.00000000    
   1.00000000    
   1.00000000    
   1.00000000    
   0.00000000    
   1.00000000    
   0.00000000    
   1.00000000    
   0.00000000    
   1.00000000    
   1.00000000    
   2.00000000    
   0.00000000    
   1.00000000    
   0.00000000    
   2.00000000    
   2.00000000    
   1.00000000    
   0.00000000    
   1.00000000    
   1.00000000    
   1.00000000    
   1.00000000    
   4.00000000    
   1.00000000    
   4.00000000    
   4.00000000    
   4.00000000    
   2.00000000    
   2.00000000    
   4.00000000    
   6.00000000    
   1.00000000    
   4.00000000    
   5.00000000    
   3.00000000    
   1.00000000    
   4.00000000    
   3.00000000    
   3.00000000    
   0.00000000    
   4.00000000    
   3.00000000    
   2.00000000    
   4.00000000    
   1.00000000    
   1.00000000    
   1.00000000    
   2.00000000    
   2.00000000    
   1.00000000    
   3.00000000    
   2.00000000    
   3.00000000    
   5.00000000    
   1.00000000    
   1.00000000    
   2.00000000    
   3.00000000    
   4.00000000    
   4.00000000    
   1.00000000    
   2.00000000    
   2.00000000    
   1.00000000    
   3.00000000    
   1.00000000    
   0.00000000    
   4.00000000    
   1.00000000    
   0.00000000    
   1.00000000    
   1.00000000    
   0.00000000    
   0.00000000    
   0.00000000    
   2.00000000    
   2.00000000    
   1.00000000    
   0.00000000    
   4.00000000    
   1.00000000    
   4.00000000    
   1.00000000    
   2.00000000    
   1.00000000    
   1.00000000    
   4.00000000    
   3.00000000    
   4.00000000    
   3.00000000    
   2.00000000    
   1.00000000    
   5.00000000    
   5.00000000    
   1.00000000    
   0.00000000    
   2.00000000    
   2.00000000    
   1.00000000    
   3.00000000    
   4.00000000    
   3.00000000    
   2.00000000    
   6.00000000    
   2.00000000    
   2.00000000    
   1.00000000    
   5.00000000    
   3.00000000    
   5.00000000    
   0.00000000    
   1.00000000    
   6.00000000    
   1.00000000    
   6.00000000    
   1.00000000    
   7.00000000    
   1.00000000    
   6.00000000    
   3.00000000    
   1.00000000    
   1.00000000    
   2.00000000    
   0.00000000    
   0.00000000    
   3.00000000    
   0.00000000    
   4.00000000    
   0.00000000    
   2.00000000    
   1.00000000    
   2.00000000    
   3.00000000    
   0.00000000    
   2.00000000    
   0.00000000    
   2.00000000    
   4.00000000    
   1.00000000    
   0.00000000    
   0.00000000    
   2.00000000    
   3.00000000    
   2.00000000    
   1.00000000    
   1.00000000    
   1.00000000    
   2.00000000    
   1.00000000    
   1.00000000    
   4.00000000    
   3.00000000    
   2.00000000    
   5.00000000    
   3.00000000    
   3.00000000    
   2.00000000    
   3.00000000    
   4.00000000    
   2.00000000    
   4.00000000    
   6.00000000    
   1.00000000    
   2.00000000    
   5.00000000    
   7.00000000    
   4.00000000    
   3.00000000    
   2.00000000    
   3.00000000    
   0.00000000    
   3.00000000    
   0.00000000    
   3.00000000    
   2.00000000    
   4.00000000    
   2.00000000    
   4.00000000    
   1.00000000    
   2.00000000    
   4.00000000    
   4.00000000    
   8.00000000    
   6.00000000    
   3.00000000    
   9.00000000    
   1.00000000    
   3.00000000    
   5.00000000    
   0.00000000    
   3.00000000    
   0.00000000    
   2.00000000    
   0.00000000    
   0.00000000    
   2.00000000    
   4.00000000    
   1.00000000    
   0.00000000    
   0.00000000    
   0.00000000    
   3.00000000    
   2.00000000    
   0.00000000    
   1.00000000    
   0.00000000    
   2.00000000    
   0.00000000    
   4.00000000    
   2.00000000    
   1.00000000    
   1.00000000    
   2.00000000    
   3.00000000    
   2.00000000    
   1.00000000    
   2.00000000    
   3.00000000    
   3.00000000    
   0.00000000    
   2.00000000    
   4.00000000    
   5.00000000    
   2.00000000    
   6.00000000    
   4.00000000    
   2.00000000    
   5.00000000    
   2.00000000    
   1.00000000    
   3.00000000    
   2.00000000    
   3.00000000    
   2.00000000    
   5.00000000    
   2.00000000    
   2.00000000    
   1.00000000    
   2.00000000    
   2.00000000    
   2.00000000    
   2.00000000    
   4.00000000    
   7.00000000    
   7.00000000    
   19.0000000    
   11.0000000    
   5.00000000    
   3.00000000    
   7.00000000    
   1.00000000    
   1.00000000    
   2.00000000    
   1.00000000    
   3.00000000    
   3.00000000    
   0.00000000    
   3.00000000    
   2.00000000    
   1.00000000    
   0.00000000    
   1.00000000    
   1.00000000    
   1.00000000    
   2.00000000    
   1.00000000    
   0.00000000    
   1.00000000    
   0.00000000    
   0.00000000    
   1.00000000    
   1.00000000    
   2.00000000    
   3.00000000    
   1.00000000    
   1.00000000    
   2.00000000    
   1.00000000    
   8.00000000    
   3.00000000    
   2.00000000    
   1.00000000    
   3.00000000    
   2.00000000    
   3.00000000    
   1.00000000    
   3.00000000    
   1.00000000    
   1.00000000    
   2.00000000    
   6.00000000    
   2.00000000    
   0.00000000    
   5.00000000    
   4.00000000    
   2.00000000    
   0.00000000    
   5.00000000    
   3.00000000    
   5.00000000    
   3.00000000    
   1.00000000    
   2.00000000    
   2.00000000    
   2.00000000    
   4.00000000    
   3.00000000    
   16.0000000    
   11.0000000    
   11.0000000    
   11.0000000    
   11.0000000    
   5.00000000    
   3.00000000    
   0.00000000    
   0.00000000    
   6.00000000    
   4.00000000    
   0.00000000    
   2.00000000    
   1.00000000    
   0.00000000    
   2.00000000    
   1.00000000    
   2.00000000    
   4.00000000    
   0.00000000    
   0.00000000    
   0.00000000    
   0.00000000    
   2.00000000    
   0.00000000    
   2.00000000    
   0.00000000    
   0.00000000    
   1.00000000    
   1.00000000    
   1.00000000    
   0.00000000    
   2.00000000    
   1.00000000    
   1.00000000    
   2.00000000    
   1.00000000    
   3.00000000    
   5.00000000    
   2.00000000    
   4.00000000    
   2.00000000    
   2.00000000    
   1.00000000    
   3.00000000    
   2.00000000    
   5.00000000    
   2.00000000    
   6.00000000    
   4.00000000    
   0.00000000    
   1.00000000    
   1.00000000    
   2.00000000    
   3.00000000    
   1.00000000    
   2.00000000    
   3.00000000    
   3.00000000    
   0.00000000    
   2.00000000    
   2.00000000    
   6.00000000    
   10.0000000    
   10.0000000    
   18.0000000    
   25.0000000    
   20.0000000    
   12.0000000    
   13.0000000    
   6.00000000    
   2.00000000    
   6.00000000    
   4.00000000    
   1.00000000    
   2.00000000    
   1.00000000    
   0.00000000    
   1.00000000    
   3.00000000    
   1.00000000    
   2.00000000    
   0.00000000    
   1.00000000    
   0.00000000    
   0.00000000    
   0.00000000    
   0.00000000    
   1.00000000    
   0.00000000    
   1.00000000    
   0.00000000    
   2.00000000    
   1.00000000    
   1.00000000    
   0.00000000    
   3.00000000    
   1.00000000    
   2.00000000    
   0.00000000    
   0.00000000    
   4.00000000    
   4.00000000    
   3.00000000    
   3.00000000    
   2.00000000    
   4.00000000    
   4.00000000    
   4.00000000    
   5.00000000    
   2.00000000    
   0.00000000    
   4.00000000    
   4.00000000    
   0.00000000    
   4.00000000    
   3.00000000    
   3.00000000    
   1.00000000    
   4.00000000    
   2.00000000    
   0.00000000    
   0.00000000    
   3.00000000    
   1.00000000    
   3.00000000    
   4.00000000    
   15.0000000    
   22.0000000    
   24.0000000    
   27.0000000    
   30.0000000    
   24.0000000    
   15.0000000    
   7.00000000    
   4.00000000    
   1.00000000    
   1.00000000    
   2.00000000    
   1.00000000    
   1.00000000    
   2.00000000    
   2.00000000    
   0.00000000    
   1.00000000    
   0.00000000    
   2.00000000    
   1.00000000    
   2.00000000    
   2.00000000    
   2.00000000    
   0.00000000    
   1.00000000    
   0.00000000    
   2.00000000    
   1.00000000    
   0.00000000    
   1.00000000    
   2.00000000    
   0.00000000    
   2.00000000    
   1.00000000    
   1.00000000    
   2.00000000    
   4.00000000    
   1.00000000    
   3.00000000    
   4.00000000    
   4.00000000    
   2.00000000    
   5.00000000    
   3.00000000    
   3.00000000    
   7.00000000    
   1.00000000    
   5.00000000    
   0.00000000    
   0.00000000    
   0.00000000    
   3.00000000    
   5.00000000    
   3.00000000    
   1.00000000    
   3.00000000    
   1.00000000    
   1.00000000    
   2.00000000    
   3.00000000    
   1.00000000    
   1.00000000    
   6.00000000    
   9.00000000    
   22.0000000    
   30.0000000    
   32.0000000    
   27.0000000    
   20.0000000    
   9.00000000    
   15.0000000    
   3.00000000    
   4.00000000    
   1.00000000    
   1.00000000    
   1.00000000    
   0.00000000    
   2.00000000    
   1.00000000    
   2.00000000    
   0.00000000    
   2.00000000    
   3.00000000    
   0.00000000    
   0.00000000    
   0.00000000    
   1.00000000    
   3.00000000    
   0.00000000    
   0.00000000    
   0.00000000    
   1.00000000    
   2.00000000    
   1.00000000    
   1.00000000    
   3.00000000    
   2.00000000    
   0.00000000    
   0.00000000    
   4.00000000    
   2.00000000    
   5.00000000    
   4.00000000    
   1.00000000    
   0.00000000    
   2.00000000    
   5.00000000    
   3.00000000    
   2.00000000    
   4.00000000    
   3.00000000    
   4.00000000    
   1.00000000    
   4.00000000    
   3.00000000    
   2.00000000    
   1.00000000    
   2.00000000    
   1.00000000    
   3.00000000    
   2.00000000    
   3.00000000    
   1.00000000    
   1.00000000    
   0.00000000    
   1.00000000    
   2.00000000    
   9.00000000    
   21.0000000    
   20.0000000    
   20.0000000    
   28.0000000    
   21.0000000    
   12.0000000    
   4.00000000    
   2.00000000    
   4.00000000    
   0.00000000    
   1.00000000    
   2.00000000    
   2.00000000    
   3.00000000    
   0.00000000    
   0.00000000    
   1.00000000    
   1.00000000    
   3.00000000    
   1.00000000    
   2.00000000    
   0.00000000    
   1.00000000    
   1.00000000    
   1.00000000    
   1.00000000    
   1.00000000    
   0.00000000    
   1.00000000    
   1.00000000    
   1.00000000    
   1.00000000    
   0.00000000    
   2.00000000    
   0.00000000    
   2.00000000    
   3.00000000    
   1.00000000    
   4.00000000    
   1.00000000    
   5.00000000    
   1.00000000    
   3.00000000    
   0.00000000    
   6.00000000    
   3.00000000    
   2.00000000    
   2.00000000    
   1.00000000    
   3.00000000    
   5.00000000    
   1.00000000    
   0.00000000    
   3.00000000    
   1.00000000    
   3.00000000    
   1.00000000    
   3.00000000    
   0.00000000    
   3.00000000    
   5.00000000    
   7.00000000    
   5.00000000    
   9.00000000    
   15.0000000    
   21.0000000    
   15.0000000    
   14.0000000    
   7.00000000    
   13.0000000    
   10.0000000    
   2.00000000    
   4.00000000    
   5.00000000    
   5.00000000    
   0.00000000    
   3.00000000    
   0.00000000    
   1.00000000    
   0.00000000    
   0.00000000    
   0.00000000    
   1.00000000    
   1.00000000    
   1.00000000    
   1.00000000    
   0.00000000    
   0.00000000    
   2.00000000    
   0.00000000    
   0.00000000    
   0.00000000    
   1.00000000    
   3.00000000    
   0.00000000    
   1.00000000    
   2.00000000    
   0.00000000    
   1.00000000    
   4.00000000    
   3.00000000    
   4.00000000    
   3.00000000    
   4.00000000    
   3.00000000    
   1.00000000    
   1.00000000    
   4.00000000    
   2.00000000    
   2.00000000    
   3.00000000    
   0.00000000    
   2.00000000    
   3.00000000    
   3.00000000    
   2.00000000    
   3.00000000    
   0.00000000    
   3.00000000    
   3.00000000    
   0.00000000    
   1.00000000    
   3.00000000    
   2.00000000    
   1.00000000    
   2.00000000    
   3.00000000    
   4.00000000    
   12.0000000    
   13.0000000    
   11.0000000    
   7.00000000    
   10.0000000    
   2.00000000    
   3.00000000    
   4.00000000    
   2.00000000    
   2.00000000    
   2.00000000    
   0.00000000    
   0.00000000    
   1.00000000    
   2.00000000    
   2.00000000    
   1.00000000    
   0.00000000    
   1.00000000    
   0.00000000    
   1.00000000    
   1.00000000    
   0.00000000    
   2.00000000    
   0.00000000    
   0.00000000    
   2.00000000    
   0.00000000    
   2.00000000    
   1.00000000    
   1.00000000    
   0.00000000    
   1.00000000    
   1.00000000    
   0.00000000    
   2.00000000    
   2.00000000    
   1.00000000    
   3.00000000    
   4.00000000    
   2.00000000    
   3.00000000    
   0.00000000    
   3.00000000    
   2.00000000    
   3.00000000    
   2.00000000    
   5.00000000    
   3.00000000    
   1.00000000    
   1.00000000    
   1.00000000    
   1.00000000    
   3.00000000    
   2.00000000    
   1.00000000    
   4.00000000    
   5.00000000    
   0.00000000    
   4.00000000    
   2.00000000    
   3.00000000    
   2.00000000    
   5.00000000    
   10.0000000    
   10.0000000    
   9.00000000    
   8.00000000    
   3.00000000    
   3.00000000    
   2.00000000    
   0.00000000    
   0.00000000    
   4.00000000    
   1.00000000    
   1.00000000    
   1.00000000    
   0.00000000    
   3.00000000    
   0.00000000    
   1.00000000    
   1.00000000    
   2.00000000    
   2.00000000    
   2.00000000    
   1.00000000    
   2.00000000    
   1.00000000    
   1.00000000    
   0.00000000    
   1.00000000    
   1.00000000    
   1.00000000    
   0.00000000    
   1.00000000    
   0.00000000    
   0.00000000    
   0.00000000    
   0.00000000    
   0.00000000    
   1.00000000    
   1.00000000    
   2.00000000    
   1.00000000    
   3.00000000    
   2.00000000    
   1.00000000    
   2.00000000    
   1.00000000    
   0.00000000    
   5.00000000    
   3.00000000    
   1.00000000    
   4.00000000    
   3.00000000    
   3.00000000    
   3.00000000    
   3.00000000    
   1.00000000    
   2.00000000    
   4.00000000    
   2.00000000    
   3.00000000    
   2.00000000    
   3.00000000    
   3.00000000    
   3.00000000    
   2.00000000    
   4.00000000    
   9.00000000    
   4.00000000    
   4.00000000    
   1.00000000    
   5.00000000    
   2.00000000    
   2.00000000    
   2.00000000    
   0.00000000    
   3.00000000    
   1.00000000    
   2.00000000    
   0.00000000    
   1.00000000    
   2.00000000    
   1.00000000    
   1.00000000    
   0.00000000    
   1.00000000    
   5.00000000    
   1.00000000    
   1.00000000    
   4.00000000    
   0.00000000    
   1.00000000    
   1.00000000    
   0.00000000    
   1.00000000    
   2.00000000    
   0.00000000    
   1.00000000    
   0.00000000    
   1.00000000    
   0.00000000    
   2.00000000    
   1.00000000    
   1.00000000    
   2.00000000    
   2.00000000    
   2.00000000    
   2.00000000    
   0.00000000    
   4.00000000    
   5.00000000    
   3.00000000    
   2.00000000    
   5.00000000    
   2.00000000    
   2.00000000    
   1.00000000    
   2.00000000    
   1.00000000    
   0.00000000    
   4.00000000    
   4.00000000    
   0.00000000    
   4.00000000    
   1.00000000    
   0.00000000    
   3.00000000    
   5.00000000    
   2.00000000    
   2.00000000    
   3.00000000    
   4.00000000    
   3.00000000    
   3.00000000    
   5.00000000    
   2.00000000    
   2.00000000    
   3.00000000    
   2.00000000    
   0.00000000    
   3.00000000    
   1.00000000    
   2.00000000    
   3.00000000    
   1.00000000    
   2.00000000    
   0.00000000    
   1.00000000    
   1.00000000    
   0.00000000    
   1.00000000    
   1.00000000    
   0.00000000    
   0.00000000    
   3.00000000    
   0.00000000    
   1.00000000    
   2.00000000    
   0.00000000    
   1.00000000    
   0.00000000    
   1.00000000    
   1.00000000    
   0.00000000    
   1.00000000    
   2.00000000    
   3.00000000    
   1.00000000    
   2.00000000    
   0.00000000    
   1.00000000    
   1.00000000    
   1.00000000    
   1.00000000    
   3.00000000    
   0.00000000    
   2.00000000    
   3.00000000    
   3.00000000    
   0.00000000    
   1.00000000    
   3.00000000    
   3.00000000    
   1.00000000    
   5.00000000    
   2.00000000    
   4.00000000    
   0.00000000    
   3.00000000    
   2.00000000    
   1.00000000    
   4.00000000    
   6.00000000    
   5.00000000    
   2.00000000    
   5.00000000    
   1.00000000    
   2.00000000    
   3.00000000    
   3.00000000    
   0.00000000    
   3.00000000    
   1.00000000    
   2.00000000    
   2.00000000    
   2.00000000    
   1.00000000    
   2.00000000    
   1.00000000    
   2.00000000    
   2.00000000    
   1.00000000    
   3.00000000    
   2.00000000    
   2.00000000    
   3.00000000    
   3.00000000    
   1.00000000    
   2.00000000    
   2.00000000    
   4.00000000    
   0.00000000    
   2.00000000    
   0.00000000    
   0.00000000    
   0.00000000    
   0.00000000    
   0.00000000    
   3.00000000    
   2.00000000    
   0.00000000    
   4.00000000    
   5.00000000    
   0.00000000    
   0.00000000    
   3.00000000    
   2.00000000    
   1.00000000    
   5.00000000    
   3.00000000    
   1.00000000    
   1.00000000    
   3.00000000    
   0.00000000    
   2.00000000    
   1.00000000    
   0.00000000    
   3.00000000    
   0.00000000    
   3.00000000    
   1.00000000    
   3.00000000    
   2.00000000    
   0.00000000    
   3.00000000    
   4.00000000    
   0.00000000    
   0.00000000    
   2.00000000    
   5.00000000    
   4.00000000    
   3.00000000    
   0.00000000    
   1.00000000    
   4.00000000    
   1.00000000    
   1.00000000    
   2.00000000    
   1.00000000    
   2.00000000    
   1.00000000    
   1.00000000    
   1.00000000    
   0.00000000    
   1.00000000    
   3.00000000    
   2.00000000    
   0.00000000    
   1.00000000    
   3.00000000    
   3.00000000    
   0.00000000    
   1.00000000    
   1.00000000    
   1.00000000    
   1.00000000    
   0.00000000    
   2.00000000    
   0.00000000    
   1.00000000    
   2.00000000    
   1.00000000    
   1.00000000    
   2.00000000    
   4.00000000    
   3.00000000    
   1.00000000    
   0.00000000    
   2.00000000    
   2.00000000    
   1.00000000    
   1.00000000    
   0.00000000    
   2.00000000    
   2.00000000    
   2.00000000    
   0.00000000    
   3.00000000    
   3.00000000    
   1.00000000    
   3.00000000    
   2.00000000    
   4.00000000    
   2.00000000    
   0.00000000    
   2.00000000    
   0.00000000    
   2.00000000    
   2.00000000    
   4.00000000    
   2.00000000    
   7.00000000    
   5.00000000    
   4.00000000    
   5.00000000    
   3.00000000    
   3.00000000    
   2.00000000    
   2.00000000    
   3.00000000    
   0.00000000    
   1.00000000    
   3.00000000    
   2.00000000    
   0.00000000    
   1.00000000    
   2.00000000    
   0.00000000    
   1.00000000    
   3.00000000    
   3.00000000    
   0.00000000    
   1.00000000    
   0.00000000    
   0.00000000    
   1.00000000    
   5.00000000    
   2.00000000    
   2.00000000    
   2.00000000    
   1.00000000    
   1.00000000    
   0.00000000    
   2.00000000    
   0.00000000    
   0.00000000    
   2.00000000    
   6.00000000    
   1.00000000    
   0.00000000    
   1.00000000    
   1.00000000    
   1.00000000    
   1.00000000    
   4.00000000    
   2.00000000    
   1.00000000    
   4.00000000    
   2.00000000    
   2.00000000    
   2.00000000    
   1.00000000    
   1.00000000    
   0.00000000    
   5.00000000    
   1.00000000    
   2.00000000    
   3.00000000    
   3.00000000    
   1.00000000    
   3.00000000    
   2.00000000    
   0.00000000    
   4.00000000    
   4.00000000    
   1.00000000    
   1.00000000    
   1.00000000    
   2.00000000    
   0.00000000    
   2.00000000    
   3.00000000    
   2.00000000    
   1.00000000    
   1.00000000    
   3.00000000    
   1.00000000    
   2.00000000    
   2.00000000    
   1.00000000    
   2.00000000    
   0.00000000    
   4.00000000    
   3.00000000    
   4.00000000    
   1.00000000    
   1.00000000    
   0.00000000    
   1.00000000    
   0.00000000    
   1.00000000    
   2.00000000    
   0.00000000    
   1.00000000    
   0.00000000    
   0.00000000    
   0.00000000    
   1.00000000    
   1.00000000    
   1.00000000    
   0.00000000    
   4.00000000    
   4.00000000    
   1.00000000    
   2.00000000    
   3.00000000    
   1.00000000    
   2.00000000    
   2.00000000    
   2.00000000    
   6.00000000    
   2.00000000    
   2.00000000    
   2.00000000    
   2.00000000    
   3.00000000    
   1.00000000    
   1.00000000    
   7.00000000    
   2.00000000    
   3.00000000    
   3.00000000    
   5.00000000    
   4.00000000    
   4.00000000    
   4.00000000    
   4.00000000    
   0.00000000    
   0.00000000    
   5.00000000    
   1.00000000    
   1.00000000    
   3.00000000    
   1.00000000    
   2.00000000    
   2.00000000    
   3.00000000    
   2.00000000    
   4.00000000    
   1.00000000    
   1.00000000    
   0.00000000    
   4.00000000    
   1.00000000    
   2.00000000    
   2.00000000    
   1.00000000    
   3.00000000    
   4.00000000    
   3.00000000    
   2.00000000    
   2.00000000    
   2.00000000    
   1.00000000    
   0.00000000    
   3.00000000    
   1.00000000    
   5.00000000    
   4.00000000    
   0.00000000    
   1.00000000    
   0.00000000    
   1.00000000    
   1.00000000    
   1.00000000    
   0.00000000    
   1.00000000    
   1.00000000    
   2.00000000    
   1.00000000    
   4.00000000    
   0.00000000    
   0.00000000    
   1.00000000    
   1.00000000    
   4.00000000    
   2.00000000    
   4.00000000    
   6.00000000    
   4.00000000    
   6.00000000    
   2.00000000    
   5.00000000    
   3.00000000    
   2.00000000    
   3.00000000    
   2.00000000    
   6.00000000    
   0.00000000    
   2.00000000    
   4.00000000    
   0.00000000    
   2.00000000    
   1.00000000    
   1.00000000    
   1.00000000    
   3.00000000    
   1.00000000    
   0.00000000    
   1.00000000    
   2.00000000    
   5.00000000    
   0.00000000    
   5.00000000    
   1.00000000    
   3.00000000    
   4.00000000    
   3.00000000    
   4.00000000    
   3.00000000    
   3.00000000    
   10.0000000    
   3.00000000    
   6.00000000    
   10.0000000    
   2.00000000    
   3.00000000    
   2.00000000    
   3.00000000    
   1.00000000    
   0.00000000    
   3.00000000    
   2.00000000    
   2.00000000    
   1.00000000    
   1.00000000    
   2.00000000    
   1.00000000    
   1.00000000    
   0.00000000    
   2.00000000    
   0.00000000    
   3.00000000    
   0.00000000    
   3.00000000    
   1.00000000    
   1.00000000    
   3.00000000    
   6.00000000    
   1.00000000    
   4.00000000    
   3.00000000    
   10.0000000    
   15.0000000    
   9.00000000    
   9.00000000    
   9.00000000    
   4.00000000    
   5.00000000    
   2.00000000    
   2.00000000    
   5.00000000    
   0.00000000    
   7.00000000    
   1.00000000    
   5.00000000    
   1.00000000    
   4.00000000    
   5.00000000    
   2.00000000    
   1.00000000    
   2.00000000    
   1.00000000    
   0.00000000    
   0.00000000    
   1.00000000    
   2.00000000    
   7.00000000    
   2.00000000    
   3.00000000    
   2.00000000    
   4.00000000    
   0.00000000    
   2.00000000    
   7.00000000    
   9.00000000    
   10.0000000    
   21.0000000    
   13.0000000    
   5.00000000    
   6.00000000    
   1.00000000    
   4.00000000    
   3.00000000    
   4.00000000    
   0.00000000    
   1.00000000    
   5.00000000    
   2.00000000    
   1.00000000    
   0.00000000    
   1.00000000    
   1.00000000    
   2.00000000    
   1.00000000    
   2.00000000    
   3.00000000    
   0.00000000    
   1.00000000    
   3.00000000    
   3.00000000    
   2.00000000    
   1.00000000    
   2.00000000    
   7.00000000    
   16.0000000    
   10.0000000    
   22.0000000    
   22.0000000    
   21.0000000    
   15.0000000    
   12.0000000    
   10.0000000    
   4.00000000    
   3.00000000    
   2.00000000    
   2.00000000    
   5.00000000    
   1.00000000    
   1.00000000    
   1.00000000    
   5.00000000    
   4.00000000    
   1.00000000    
   3.00000000    
   3.00000000    
   2.00000000    
   3.00000000    
   2.00000000    
   3.00000000    
   1.00000000    
   1.00000000    
   2.00000000    
   1.00000000    
   2.00000000    
   0.00000000    
   1.00000000    
   9.00000000    
   6.00000000    
   14.0000000    
   19.0000000    
   24.0000000    
   15.0000000    
   5.00000000    
   5.00000000    
   3.00000000    
   10.0000000    
   4.00000000    
   0.00000000    
   1.00000000    
   0.00000000    
   0.00000000    
   1.00000000    
   0.00000000    
   1.00000000    
   0.00000000    
   1.00000000    
   2.00000000    
   1.00000000    
   1.00000000    
   1.00000000    
   1.00000000    
   4.00000000    
   3.00000000    
   5.00000000    
   3.00000000    
   7.00000000    
   4.00000000    
   7.00000000    
   11.0000000    
   18.0000000    
   24.0000000    
   30.0000000    
   20.0000000    
   21.0000000    
   13.0000000    
   10.0000000    
   9.00000000    
   4.00000000    
   5.00000000    
   5.00000000    
   4.00000000    
   1.00000000    
   1.00000000    
   1.00000000    
   2.00000000    
   1.00000000    
   4.00000000    
   2.00000000    
   1.00000000    
   3.00000000    
   2.00000000    
   6.00000000    
   3.00000000    
   0.00000000    
   0.00000000    
   2.00000000    
   4.00000000    
   3.00000000    
   1.00000000    
   6.00000000    
   15.0000000    
   16.0000000    
   26.0000000    
   29.0000000    
   24.0000000    
   21.0000000    
   12.0000000    
   5.00000000    
   6.00000000    
   2.00000000    
   2.00000000    
   2.00000000    
   0.00000000    
   0.00000000    
   1.00000000    
   1.00000000    
   2.00000000    
   0.00000000    
   1.00000000    
   1.00000000    
   0.00000000    
   1.00000000    
   1.00000000    
   2.00000000    
   2.00000000    
   0.00000000    
   5.00000000    
   4.00000000    
   5.00000000    
   1.00000000    
   4.00000000    
   19.0000000    
   11.0000000    
   25.0000000    
   27.0000000    
   32.0000000    
   20.0000000    
   15.0000000    
   11.0000000    
   9.00000000    
   4.00000000    
   3.00000000    
   1.00000000    
   4.00000000    
   5.00000000    
   2.00000000    
   3.00000000    
   3.00000000    
   1.00000000    
   3.00000000    
   2.00000000    
   6.00000000    
   4.00000000    
   2.00000000    
   2.00000000    
   4.00000000    
   1.00000000    
   0.00000000    
   0.00000000    
   1.00000000    
   3.00000000    
   0.00000000    
   3.00000000    
   2.00000000    
   10.0000000    
   20.0000000    
   28.0000000    
   28.0000000    
   24.0000000    
   26.0000000    
   24.0000000    
   14.0000000    
   5.00000000    
   5.00000000    
   2.00000000    
   0.00000000    
   1.00000000    
   1.00000000    
   2.00000000    
   0.00000000    
   0.00000000    
   3.00000000    
   0.00000000    
   0.00000000    
   10.0000000    
   4.00000000    
   0.00000000    
   1.00000000    
   1.00000000    
   1.00000000    
   2.00000000    
   6.00000000    
   1.00000000    
   6.00000000    
   8.00000000    
   11.0000000    
   11.0000000    
   20.0000000    
   30.0000000    
   27.0000000    
   28.0000000    
   14.0000000    
   7.00000000    
   8.00000000    
   4.00000000    
   3.00000000    
   2.00000000    
   3.00000000    
   3.00000000    
   0.00000000    
   1.00000000    
   1.00000000    
   2.00000000    
   3.00000000    
   1.00000000    
   4.00000000    
   0.00000000    
   6.00000000    
   1.00000000    
   3.00000000    
   2.00000000    
   3.00000000    
   2.00000000    
   0.00000000    
   4.00000000    
   1.00000000    
   1.00000000    
   8.00000000    
   11.0000000    
   22.0000000    
   14.0000000    
   33.0000000    
   32.0000000    
   24.0000000    
   25.0000000    
   17.0000000    
   6.00000000    
   4.00000000    
   5.00000000    
   4.00000000    
   1.00000000    
   0.00000000    
   4.00000000    
   1.00000000    
   1.00000000    
   2.00000000    
   0.00000000    
   1.00000000    
   4.00000000    
   1.00000000    
   2.00000000    
   1.00000000    
   3.00000000    
   2.00000000    
   1.00000000    
   3.00000000    
   1.00000000    
   3.00000000    
   6.00000000    
   5.00000000    
   11.0000000    
   12.0000000    
   24.0000000    
   20.0000000    
   21.0000000    
   7.00000000    
   10.0000000    
   3.00000000    
   1.00000000    
   5.00000000    
   3.00000000    
   0.00000000    
   3.00000000    
   2.00000000    
   2.00000000    
   0.00000000    
   1.00000000    
   2.00000000    
   3.00000000    
   2.00000000    
   6.00000000    
   0.00000000    
   2.00000000    
   2.00000000    
   1.00000000    
   2.00000000    
   2.00000000    
   2.00000000    
   1.00000000    
   1.00000000    
   1.00000000    
   2.00000000    
   6.00000000    
   20.0000000    
   17.0000000    
   13.0000000    
   34.0000000    
   23.0000000    
   15.0000000    
   13.0000000    
   4.00000000    
   2.00000000    
   4.00000000    
   1.00000000    
   1.00000000    
   0.00000000    
   1.00000000    
   0.00000000    
   1.00000000    
   3.00000000    
   0.00000000    
   1.00000000    
   0.00000000    
   2.00000000    
   0.00000000    
   2.00000000    
   1.00000000    
   0.00000000    
   6.00000000    
   4.00000000    
   2.00000000    
   1.00000000    
   3.00000000    
   3.00000000    
   5.00000000    
   13.0000000    
   15.0000000    
   9.00000000    
   12.0000000    
   13.0000000    
   2.00000000    
   3.00000000    
   5.00000000    
   2.00000000    
   3.00000000    
   1.00000000    
   2.00000000    
   3.00000000    
   2.00000000    
   1.00000000    
   0.00000000    
   3.00000000    
   2.00000000    
   2.00000000    
   1.00000000    
   2.00000000    
   0.00000000    
   3.00000000    
   3.00000000    
   1.00000000    
   1.00000000    
   0.00000000    
   0.00000000    
   1.00000000    
   4.00000000    
   2.00000000    
   4.00000000    
   2.00000000    
   10.0000000    
   11.0000000    
   22.0000000    
   8.00000000    
   13.0000000    
   3.00000000    
   2.00000000    
   4.00000000    
   5.00000000    
   1.00000000    
   1.00000000    
   0.00000000    
   1.00000000    
   2.00000000    
   2.00000000    
   2.00000000    
   1.00000000    
   1.00000000    
   0.00000000    
   1.00000000    
   4.00000000    
   0.00000000    
   4.00000000    
   3.00000000    
   3.00000000    
   1.00000000    
   3.00000000    
   1.00000000    
   9.00000000    
   7.00000000    
   3.00000000    
   6.00000000    
   7.00000000    
   15.0000000    
   4.00000000    
   10.0000000    
   3.00000000    
   2.00000000    
   2.00000000    
   2.00000000    
   0.00000000    
   4.00000000    
   2.00000000    
   2.00000000    
   3.00000000    
   2.00000000    
   0.00000000    
   2.00000000    
   6.00000000    
   4.00000000    
   3.00000000    
   2.00000000    
   3.00000000    
   0.00000000    
   3.00000000    
   1.00000000    
   5.00000000    
   3.00000000    
   5.00000000    
   1.00000000    
   1.00000000    
   3.00000000    
   3.00000000    
   5.00000000    
   6.00000000    
   6.00000000    
   14.0000000    
   8.00000000    
   1.00000000    
   2.00000000    
   2.00000000    
   3.00000000    
   2.00000000    
   3.00000000    
   0.00000000    
   1.00000000    
   0.00000000    
   1.00000000    
   1.00000000    
   0.00000000    
   0.00000000    
   2.00000000    
   0.00000000    
   0.00000000    
   3.00000000    
   0.00000000    
   1.00000000    
   1.00000000    
   1.00000000    
   2.00000000    
   4.00000000    
   2.00000000    
   1.00000000    
   1.00000000    
   0.00000000    
   2.00000000    
   4.00000000    
   3.00000000    
   2.00000000    
   2.00000000    
   4.00000000    
   0.00000000    
   2.00000000    
   3.00000000    
   3.00000000    
   1.00000000    
   3.00000000    
   1.00000000    
   2.00000000    
   5.00000000    
   1.00000000    
   3.00000000    
   3.00000000    
   1.00000000    
   2.00000000    
   1.00000000    
   3.00000000    
   3.00000000    
   0.00000000    
   4.00000000    
   2.00000000    
   5.00000000    
   4.00000000    
   1.00000000    
   3.00000000    
   2.00000000    
   1.00000000    
   2.00000000    
   1.00000000    
   5.00000000    
   6.00000000    
   2.00000000    
   1.00000000    
   2.00000000    
   3.00000000    
   1.00000000    
   1.00000000    
   0.00000000    
   2.00000000    
   0.00000000    
   0.00000000    
   4.00000000    
   0.00000000    
   3.00000000    
   2.00000000    
   1.00000000    
   0.00000000    
   3.00000000    
   2.00000000    
   1.00000000    
   3.00000000    
   3.00000000    
   2.00000000    
   1.00000000    
   4.00000000    
   0.00000000    
   3.00000000    
   1.00000000    
   0.00000000    
   6.00000000    
   1.00000000    
   4.00000000    
   4.00000000    
   4.00000000    
   2.00000000    
   0.00000000    
   2.00000000    
   2.00000000    
   1.00000000    
   1.00000000    
   0.00000000    
   1.00000000    
   4.00000000    
   0.00000000    
   2.00000000    
   1.00000000    
   0.00000000    
   0.00000000    
   3.00000000    
   2.00000000    
   1.00000000    
   1.00000000    
   4.00000000    
   0.00000000    
   2.00000000    
   2.00000000    
   2.00000000    
   0.00000000    
   0.00000000    
   1.00000000    
   1.00000000    
   2.00000000    
   0.00000000    
   4.00000000    
   2.00000000    
   1.00000000    
   1.00000000    
   2.00000000    
   1.00000000    
   0.00000000    
   1.00000000    
   0.00000000    
   3.00000000    
   3.00000000    
   1.00000000    
   0.00000000    
   1.00000000    
   1.00000000    
   1.00000000    
   0.00000000    
   4.00000000    
   0.00000000    
   4.00000000    
   1.00000000    
   3.00000000    
   1.00000000    
   1.00000000    
   1.00000000    
   1.00000000    
   0.00000000    
   5.00000000    
   2.00000000    
   6.00000000    
   4.00000000    
   1.00000000    
   1.00000000    
   0.00000000    
   5.00000000    
   2.00000000    
   4.00000000    
   0.00000000    
   0.00000000    
   2.00000000    
   2.00000000    
   1.00000000    
   3.00000000    
   1.00000000    
   5.00000000    
   7.00000000    
   1.00000000    
   0.00000000    
   0.00000000    
   2.00000000    
   2.00000000    
   1.00000000    
   5.00000000    
   2.00000000    
   2.00000000    
   2.00000000    
   0.00000000    
   0.00000000    
   1.00000000    
   1.00000000    
   2.00000000    
   3.00000000    
   2.00000000    
   1.00000000    
   1.00000000    
   0.00000000    
   3.00000000    
   2.00000000    
   6.00000000    
   6.00000000    
   1.00000000    
   0.00000000    
   1.00000000    
   0.00000000    
   1.00000000    
   0.00000000    
   3.00000000    
   1.00000000    
   1.00000000    
   0.00000000    
   0.00000000    
   0.00000000    
   3.00000000    
   2.00000000    
   4.00000000    
   3.00000000    
   1.00000000    
   2.00000000    
   1.00000000    
   2.00000000    
   3.00000000    
   0.00000000    
   1.00000000    
   4.00000000    
   1.00000000    
   2.00000000    
   1.00000000    
   1.00000000    
   5.00000000    
   2.00000000    
   1.00000000    
   3.00000000    
   3.00000000    
   2.00000000    
   1.00000000    
   3.00000000    
   1.00000000    
   1.00000000    
   1.00000000    
   2.00000000    
   2.00000000    
   2.00000000    
   1.00000000    
   0.00000000    
   2.00000000    
   0.00000000    
   3.00000000    
   5.00000000    
   2.00000000    
   0.00000000    
   2.00000000    
   1.00000000    
   1.00000000    
   2.00000000    
   1.00000000    
   2.00000000    
   2.00000000    
   1.00000000    
   1.00000000    
   2.00000000    
   2.00000000    
   2.00000000    
   1.00000000    
   2.00000000    
   3.00000000    
   1.00000000    
   1.00000000    
   4.00000000    
   1.00000000    
   1.00000000    
   0.00000000    
   1.00000000    
   1.00000000    
   3.00000000    
   1.00000000    
   2.00000000    
   1.00000000    
   1.00000000    
   0.00000000    
   2.00000000    
   0.00000000    
   2.00000000    
   2.00000000    
   2.00000000    
   0.00000000    
   3.00000000    
   3.00000000    
   0.00000000    
   2.00000000    
   1.00000000    
   1.00000000    
   2.00000000    
   0.00000000    
   0.00000000    
   1.00000000    
   1.00000000    
   1.00000000    
   2.00000000    
   2.00000000    
   2.00000000    
   2.00000000    
   0.00000000    
   3.00000000    
   3.00000000    
   1.00000000    
   4.00000000    
   3.00000000    
   4.00000000    
   1.00000000    
   0.00000000    
   5.00000000    
   4.00000000    
   2.00000000    
   0.00000000    
   1.00000000    
   4.00000000    
   4.00000000    
   1.00000000    
   1.00000000    
   1.00000000    
   0.00000000    
   2.00000000    
   1.00000000    
   2.00000000    
   2.00000000    
   3.00000000    
   3.00000000    
   1.00000000    
   1.00000000    
   2.00000000    
   1.00000000    
   3.00000000    
   2.00000000    
   0.00000000    
   3.00000000    
   0.00000000    
   0.00000000    
   1.00000000    
   1.00000000    
   0.00000000    
   2.00000000    
   2.00000000    
   0.00000000    
   0.00000000    
   0.00000000    
   2.00000000    
   0.00000000    
   1.00000000    
   4.00000000    
   0.00000000    
   3.00000000    
   2.00000000    
   1.00000000    
   1.00000000    
   0.00000000    
   2.00000000    
   3.00000000    
   0.00000000    
   1.00000000    
   2.00000000    
   2.00000000    
   1.00000000    
   1.00000000    
   0.00000000    
   2.00000000    
   4.00000000    
   4.00000000    
   2.00000000    
   2.00000000    
   3.00000000    
   0.00000000    
   1.00000000    
   1.00000000    
   1.00000000    
   1.00000000    
   1.00000000    
   0.00000000    
   1.00000000    
   1.00000000    
   4.00000000    
   0.00000000    
   1.00000000    
   1.00000000    
   0.00000000    
   0.00000000    
   1.00000000    
   2.00000000    
   2.00000000    
   1.00000000    
   1.00000000    
   1.00000000    
   1.00000000    
   0.00000000    
   2.00000000    
   2.00000000    
   0.00000000    
   2.00000000    
   3.00000000    
   1.00000000    
   1.00000000    
   2.00000000    
   0.00000000    
   1.00000000    
   0.00000000    
   1.00000000    
   2.00000000    
   1.00000000    
   1.00000000    
   3.00000000    
   0.00000000    
   1.00000000    
   3.00000000    
   0.00000000    
   2.00000000    
   0.00000000    
   1.00000000    
   0.00000000    
   2.00000000    
   2.00000000    
   3.00000000    
   0.00000000    
   1.00000000    
   0.00000000    
   0.00000000    
   3.00000000    
   2.00000000    
   1.00000000    
   1.00000000    
   1.00000000    
   1.00000000    
   3.00000000    
   4.00000000    
   0.00000000    
   1.00000000    
   3.00000000    
   1.00000000    
   1.00000000    
   4.00000000    
   1.00000000    
   3.00000000    
   0.00000000    
   1.00000000    
   2.00000000    
   1.00000000    
   1.00000000    
   4.00000000    
   0.00000000    
   3.00000000    
   3.00000000    
   1.00000000    
   0.00000000    
   1.00000000    
   0.00000000    
   3.00000000    
   2.00000000    
   3.00000000    
   1.00000000    
   1.00000000    
   0.00000000    
   3.00000000    
   0.00000000    
   0.00000000    
   0.00000000    
   1.00000000    
   0.00000000    
   3.00000000    
   0.00000000    
   0.00000000    
   3.00000000    
   1.00000000    
   3.00000000    
   1.00000000    
   3.00000000    
   2.00000000    
   1.00000000    
   1.00000000    
   2.00000000    
   0.00000000    
   3.00000000    
   0.00000000    
   1.00000000    
   2.00000000    
   1.00000000    
   0.00000000    
   1.00000000    
   2.00000000    
   3.00000000    
   1.00000000    
   1.00000000    
   1.00000000    
   1.00000000    
   2.00000000    
   2.00000000    
   2.00000000    
   4.00000000    
   0.00000000    
   1.00000000    
   6.00000000    
   2.00000000    
   8.00000000    
   2.00000000    
   2.00000000    
   3.00000000    
   2.00000000    
   1.00000000    
   2.00000000    
   1.00000000    
   1.00000000    
   1.00000000    
   0.00000000    
   2.00000000    
   2.00000000    
   0.00000000    
   2.00000000    
   1.00000000    
   3.00000000    
   1.00000000    
   1.00000000    
   4.00000000    
   0.00000000    
   2.00000000    
   3.00000000    
   1.00000000    
   1.00000000    
   1.00000000    
   2.00000000    
   1.00000000    
   0.00000000    
   1.00000000    
   1.00000000    
   4.00000000    
   0.00000000    
   1.00000000    
   2.00000000    
   0.00000000    
   2.00000000    
   1.00000000    
   0.00000000    
   1.00000000    
   0.00000000    
   1.00000000    
   0.00000000    
   2.00000000    
   2.00000000    
   3.00000000    
   0.00000000    
   2.00000000    
   0.00000000    
   0.00000000    
   2.00000000    
   0.00000000    
   2.00000000    
   2.00000000    
   2.00000000    
   0.00000000    
   0.00000000    
   0.00000000    
   2.00000000    
   3.00000000    
   2.00000000    
   9.00000000    
   15.0000000    
   10.0000000    
   11.0000000    
   6.00000000    
   4.00000000    
   3.00000000    
   1.00000000    
   1.00000000    
   3.00000000    
   2.00000000    
   1.00000000    
   0.00000000    
   3.00000000    
   2.00000000    
   2.00000000    
   3.00000000    
   2.00000000    
   1.00000000    
   2.00000000    
   0.00000000    
   1.00000000    
   1.00000000    
   3.00000000    
   2.00000000    
   2.00000000    
   2.00000000    
   0.00000000    
   2.00000000    
   2.00000000    
   2.00000000    
   1.00000000    
   0.00000000    
   0.00000000    
   0.00000000    
   2.00000000    
   3.00000000    
   3.00000000    
   2.00000000    
   3.00000000    
   0.00000000    
   0.00000000    
   0.00000000    
   4.00000000    
   2.00000000    
   2.00000000    
   1.00000000    
   1.00000000    
   1.00000000    
   1.00000000    
   0.00000000    
   1.00000000    
   0.00000000    
   1.00000000    
   1.00000000    
   1.00000000    
   0.00000000    
   2.00000000    
   1.00000000    
   1.00000000    
   4.00000000    
   1.00000000    
   3.00000000    
   7.00000000    
   6.00000000    
   16.0000000    
   20.0000000    
   22.0000000    
   20.0000000    
   2.00000000    
   5.00000000    
   2.00000000    
   2.00000000    
   2.00000000    
   2.00000000    
   0.00000000    
   0.00000000    
   3.00000000    
   0.00000000    
   3.00000000    
   0.00000000    
   0.00000000    
   0.00000000    
   1.00000000    
   0.00000000    
   1.00000000    
   0.00000000    
   4.00000000    
   0.00000000    
   0.00000000    
   0.00000000    
   0.00000000    
   0.00000000    
   0.00000000    
   1.00000000    
   1.00000000    
   1.00000000    
   1.00000000    
   1.00000000    
   2.00000000    
   3.00000000    
   4.00000000    
   1.00000000    
   1.00000000    
   0.00000000    
   0.00000000    
   1.00000000    
   1.00000000    
   3.00000000    
   4.00000000    
   0.00000000    
   2.00000000    
   2.00000000    
   0.00000000    
   2.00000000    
   1.00000000    
   0.00000000    
   0.00000000    
   1.00000000    
   1.00000000    
   1.00000000    
   1.00000000    
   3.00000000    
   3.00000000    
   3.00000000    
   3.00000000    
   10.0000000    
   9.00000000    
   14.0000000    
   26.0000000    
   28.0000000    
   14.0000000    
   17.0000000    
   10.0000000    
   6.00000000    
   1.00000000    
   0.00000000    
   1.00000000    
   1.00000000    
   2.00000000    
   1.00000000    
   1.00000000    
   2.00000000    
   2.00000000    
   0.00000000    
   0.00000000    
   1.00000000    
   0.00000000    
   0.00000000    
   1.00000000    
   0.00000000    
   0.00000000    
   0.00000000    
   0.00000000    
   1.00000000    
   2.00000000    
   0.00000000    
   3.00000000    
   3.00000000    
   0.00000000    
   2.00000000    
   0.00000000    
   0.00000000    
   2.00000000    
   1.00000000    
   1.00000000    
   2.00000000    
   0.00000000    
   1.00000000    
   0.00000000    
   0.00000000    
   0.00000000    
   0.00000000    
   1.00000000    
   1.00000000    
   4.00000000    
   0.00000000    
   2.00000000    
   3.00000000    
   3.00000000    
   1.00000000    
   1.00000000    
   2.00000000    
   0.00000000    
   1.00000000    
   3.00000000    
   2.00000000    
   3.00000000    
   4.00000000    
   4.00000000    
   3.00000000    
   10.0000000    
   19.0000000    
   29.0000000    
   28.0000000    
   33.0000000    
   13.0000000    
   11.0000000    
   6.00000000    
   5.00000000    
   4.00000000    
   1.00000000    
   1.00000000    
   1.00000000    
   2.00000000    
   0.00000000    
   1.00000000    
   1.00000000    
   0.00000000    
   1.00000000    
   2.00000000    
   0.00000000    
   0.00000000    
   3.00000000    
   0.00000000    
   0.00000000    
   3.00000000    
   4.00000000    
   1.00000000    
   0.00000000    
   3.00000000    
   2.00000000    
   1.00000000    
   4.00000000    
   2.00000000    
   0.00000000    
   1.00000000    
   2.00000000    
   1.00000000    
   1.00000000    
   0.00000000    
   0.00000000    
   1.00000000    
   0.00000000    
   1.00000000    
   1.00000000    
   2.00000000    
   0.00000000    
   1.00000000    
   0.00000000    
   1.00000000    
   1.00000000    
   0.00000000    
   1.00000000    
   1.00000000    
   0.00000000    
   2.00000000    
   1.00000000    
   0.00000000    
   2.00000000    
   0.00000000    
   0.00000000    
   1.00000000    
   3.00000000    
   6.00000000    
   21.0000000    
   24.0000000    
   24.0000000    
   24.0000000    
   32.0000000    
   34.0000000    
   22.0000000    
   14.0000000    
   6.00000000    
   2.00000000    
   0.00000000    
   2.00000000    
   2.00000000    
   2.00000000    
   1.00000000    
   3.00000000    
   2.00000000    
   1.00000000    
   0.00000000    
   0.00000000    
   0.00000000    
   1.00000000    
   1.00000000    
   0.00000000    
   1.00000000    
   0.00000000    
   3.00000000    
   3.00000000    
   2.00000000    
   3.00000000    
   4.00000000    
   2.00000000    
   1.00000000    
   0.00000000    
   2.00000000    
   2.00000000    
   2.00000000    
   2.00000000    
   3.00000000    
   3.00000000    
   2.00000000    
   1.00000000    
   2.00000000    
   0.00000000    
   1.00000000    
   0.00000000    
   0.00000000    
   1.00000000    
   0.00000000    
   0.00000000    
   2.00000000    
   0.00000000    
   2.00000000    
   1.00000000    
   1.00000000    
   2.00000000    
   5.00000000    
   1.00000000    
   2.00000000    
   1.00000000    
   1.00000000    
   1.00000000    
   2.00000000    
   10.0000000    
   13.0000000    
   15.0000000    
   21.0000000    
   26.0000000    
   24.0000000    
   23.0000000    
   8.00000000    
   8.00000000    
   2.00000000    
   1.00000000    
   3.00000000    
   2.00000000    
   2.00000000    
   1.00000000    
   0.00000000    
   1.00000000    
   0.00000000    
   0.00000000    
   0.00000000    
   0.00000000    
   1.00000000    
   0.00000000    
   4.00000000    
   1.00000000    
   1.00000000    
   1.00000000    
   1.00000000    
   0.00000000    
   0.00000000    
   0.00000000    
   1.00000000    
   2.00000000    
   0.00000000    
   1.00000000    
   3.00000000    
   2.00000000    
   2.00000000    
   0.00000000    
   1.00000000    
   0.00000000    
   1.00000000    
   0.00000000    
   1.00000000    
   1.00000000    
   0.00000000    
   2.00000000    
   0.00000000    
   2.00000000    
   0.00000000    
   0.00000000    
   2.00000000    
   0.00000000    
   0.00000000    
   1.00000000    
   1.00000000    
   1.00000000    
   1.00000000    
   1.00000000    
   3.00000000    
   3.00000000    
   0.00000000    
   0.00000000    
   2.00000000    
   2.00000000    
   5.00000000    
   5.00000000    
   12.0000000    
   24.0000000    
   25.0000000    
   15.0000000    
   13.0000000    
   1.00000000    
   1.00000000    
   1.00000000    
   2.00000000    
   2.00000000    
   3.00000000    
   1.00000000    
   3.00000000    
   1.00000000    
   1.00000000    
   1.00000000    
   1.00000000    
   3.00000000    
   1.00000000    
   4.00000000    
   2.00000000    
   0.00000000    
   2.00000000    
   4.00000000    
   3.00000000    
   2.00000000    
   0.00000000    
   3.00000000    
   4.00000000    
   1.00000000    
   2.00000000    
   2.00000000    
   2.00000000    
   3.00000000    
   0.00000000    
   1.00000000    
   1.00000000    
   0.00000000    
   2.00000000    
   3.00000000    
   3.00000000    
   1.00000000    
   0.00000000    
   4.00000000    
   3.00000000    
   1.00000000    
   0.00000000    
   0.00000000    
   2.00000000    
   1.00000000    
   1.00000000    
   0.00000000    
   0.00000000    
   2.00000000    
   1.00000000    
   0.00000000    
   3.00000000    
   3.00000000    
   0.00000000    
   1.00000000    
   2.00000000    
   3.00000000    
   6.00000000    
   5.00000000    
   5.00000000    
   14.0000000    
   17.0000000    
   13.0000000    
   3.00000000    
   2.00000000    
   2.00000000    
   2.00000000    
   6.00000000    
   1.00000000    
   3.00000000    
   1.00000000    
   2.00000000    
   4.00000000    
   1.00000000    
   0.00000000    
   0.00000000    
   0.00000000    
   0.00000000    
   1.00000000    
   0.00000000    
   10.0000000    
   3.00000000    
   2.00000000    
   1.00000000    
   0.00000000    
   1.00000000    
   1.00000000    
   0.00000000    
   1.00000000    
   0.00000000    
   1.00000000    
   0.00000000    
   3.00000000    
   0.00000000    
   2.00000000    
   0.00000000    
   3.00000000    
   0.00000000    
   1.00000000    
   1.00000000    
   2.00000000    
   0.00000000    
   1.00000000    
   2.00000000    
   0.00000000    
   2.00000000    
   0.00000000    
   0.00000000    
   3.00000000    
   1.00000000    
   0.00000000    
   2.00000000    
   1.00000000    
   4.00000000    
   0.00000000    
   1.00000000    
   0.00000000    
   1.00000000    
   0.00000000    
   1.00000000    
   2.00000000    
   1.00000000    
   3.00000000    
   6.00000000    
   5.00000000    
   6.00000000    
   4.00000000    
   2.00000000    
   2.00000000    
   3.00000000    
   1.00000000    
   6.00000000    
   2.00000000    
   1.00000000    
   1.00000000    
   3.00000000    
   0.00000000    
   3.00000000    
   4.00000000    
   0.00000000    
   0.00000000    
   1.00000000    
   1.00000000    
   2.00000000    
   3.00000000    
   2.00000000    
   2.00000000    
   1.00000000    
   0.00000000    
   2.00000000    
   3.00000000    
   0.00000000    
   4.00000000    
   0.00000000    
   1.00000000    
   1.00000000    
   2.00000000    
   4.00000000    
   3.00000000    
   0.00000000    
   0.00000000    
   2.00000000    
   5.00000000    
   1.00000000    
   0.00000000    
   2.00000000    
   0.00000000    
   0.00000000    
   1.00000000    
   0.00000000    
   1.00000000    
   1.00000000    
   0.00000000    
   1.00000000    
   2.00000000    
   0.00000000    
   1.00000000    
   0.00000000    
   3.00000000    
   2.00000000    
   1.00000000    
   5.00000000    
   1.00000000    
   0.00000000    
   3.00000000    
   4.00000000    
   10.0000000    
   2.00000000    
   5.00000000    
   4.00000000    
   2.00000000    
   4.00000000    
   3.00000000    
   1.00000000    
   0.00000000    
   1.00000000    
   3.00000000    
   1.00000000    
   0.00000000    
   1.00000000    
   2.00000000    
   2.00000000    
   0.00000000    
   0.00000000    
   3.00000000    
   0.00000000    
   1.00000000    
   4.00000000    
   2.00000000    
   2.00000000    
   0.00000000    
   2.00000000    
   2.00000000    
   1.00000000    
   2.00000000    
   1.00000000    
   1.00000000    
   1.00000000    
   4.00000000    
   1.00000000    
   1.00000000    
   2.00000000    
   1.00000000    
   1.00000000    
   2.00000000    
   2.00000000    
   0.00000000    
   3.00000000    
   1.00000000    
   2.00000000    
   0.00000000    
   1.00000000    
   0.00000000    
   2.00000000    
   0.00000000    
   0.00000000    
   0.00000000    
   1.00000000    
   0.00000000    
   0.00000000    
   0.00000000    
   1.00000000    
   0.00000000    
   2.00000000    
   1.00000000    
   2.00000000    
   2.00000000    
   3.00000000    
   1.00000000    
   3.00000000    
   4.00000000    
   2.00000000    
   2.00000000    
   5.00000000    
   4.00000000    
   5.00000000    
   2.00000000    
   1.00000000    
   1.00000000    
   0.00000000    
   1.00000000    
   2.00000000    
   2.00000000    
   1.00000000    
   3.00000000    
   2.00000000    
   0.00000000    
   0.00000000    
   4.00000000    
   3.00000000    
   1.00000000    
   3.00000000    
   1.00000000    
   1.00000000    
   2.00000000    
   0.00000000    
   2.00000000    
   2.00000000    
   4.00000000    
   3.00000000    
   3.00000000    
   4.00000000    
   1.00000000    
   4.00000000    
   2.00000000    
   0.00000000    
   1.00000000    
   1.00000000    
   0.00000000    
   0.00000000    
   0.00000000    
   1.00000000    
   0.00000000    
   1.00000000    
   2.00000000    
   0.00000000    
   0.00000000    
   0.00000000    
   1.00000000    
   2.00000000    
   0.00000000    
   1.00000000    
   0.00000000    
   2.00000000    
   1.00000000    
   1.00000000    
   1.00000000    
   4.00000000    
   1.00000000    
   2.00000000    
   0.00000000    
   1.00000000    
   0.00000000    
   4.00000000    
   0.00000000    
   2.00000000    
   0.00000000    
   4.00000000    
   1.00000000    
   1.00000000    
   3.00000000    
   0.00000000    
   0.00000000    
   1.00000000    
   1.00000000    
   1.00000000    
   2.00000000    
   0.00000000    
   1.00000000    
   2.00000000    
   0.00000000    
   1.00000000    
   1.00000000    
   3.00000000    
   0.00000000    
   2.00000000    
   0.00000000    
   0.00000000    
   2.00000000    
   2.00000000    
   2.00000000    
   1.00000000    
   2.00000000    
   1.00000000    
   3.00000000    
   1.00000000    
   4.00000000    
   1.00000000    
   0.00000000    
   0.00000000    
   1.00000000    
   2.00000000    
   2.00000000    
   3.00000000    
   1.00000000    
   2.00000000    
   2.00000000    
   0.00000000    
   3.00000000    
   2.00000000    
   1.00000000    
   0.00000000    
   0.00000000    
   1.00000000    
   1.00000000    
   0.00000000    
   0.00000000    
   0.00000000    
   1.00000000    
   0.00000000    
   2.00000000    
   0.00000000    
   1.00000000    
   2.00000000    
   1.00000000    
   5.00000000    
   3.00000000    
   0.00000000    
   1.00000000    
   0.00000000    
   1.00000000    
   1.00000000    
   1.00000000    
   1.00000000    
   0.00000000    
   2.00000000    
   3.00000000    
   0.00000000    
   4.00000000    
   3.00000000    
   0.00000000    
   3.00000000    
   1.00000000    
   0.00000000    
   0.00000000    
   2.00000000    
   0.00000000    
   2.00000000    
   0.00000000    
   0.00000000    
   1.00000000    
   2.00000000    
   1.00000000    
   2.00000000    
   1.00000000    
   4.00000000    
   0.00000000    
   1.00000000    
   1.00000000    
   1.00000000    
   3.00000000    
   2.00000000    
   2.00000000    
   2.00000000    
   1.00000000    
   1.00000000    
   1.00000000    
   1.00000000    
   2.00000000    
   2.00000000    
   2.00000000    
   4.00000000    
   2.00000000    
   0.00000000    
   1.00000000    
   1.00000000    
   2.00000000    
   0.00000000    
   2.00000000    
   1.00000000    
   1.00000000    
   2.00000000    
   1.00000000    
   1.00000000    
   0.00000000    
   2.00000000    
   0.00000000    
   1.00000000    
   0.00000000    
   4.00000000    
   2.00000000    
   1.00000000    
   0.00000000    
   0.00000000    
   1.00000000    
   0.00000000    
   0.00000000    
   0.00000000    
   1.00000000    
   0.00000000    
   3.00000000    
   1.00000000    
   1.00000000    
   2.00000000    
   2.00000000    
   0.00000000    
   1.00000000    
   2.00000000    
   0.00000000    
   0.00000000    
   3.00000000    
   3.00000000    
   0.00000000    
   3.00000000    
   1.00000000    
   3.00000000    
   2.00000000    
   4.00000000    
   2.00000000    
   0.00000000    
   2.00000000    
   4.00000000    
   2.00000000    
   1.00000000    
   0.00000000    
   4.00000000    
   3.00000000    
   4.00000000    
   0.00000000    
   1.00000000    
   3.00000000    
   0.00000000    
   1.00000000    
   3.00000000    
   1.00000000    
   1.00000000    
   1.00000000    
   4.00000000    
   2.00000000    
   1.00000000    
   1.00000000    
   1.00000000    
   1.00000000    
   1.00000000    
   3.00000000    
   1.00000000    
   0.00000000    
   2.00000000    
   1.00000000    
   0.00000000    
   2.00000000    
   1.00000000    
   0.00000000    
   0.00000000    
   2.00000000    
   5.00000000    
   0.00000000    
   1.00000000    
   2.00000000    
   4.00000000    
   1.00000000    
   1.00000000    
   0.00000000    
   0.00000000    
   1.00000000    
   0.00000000    
   1.00000000    
   0.00000000    
   3.00000000    
   0.00000000    
   2.00000000    
   2.00000000    
   0.00000000    
   3.00000000    
   2.00000000    
   4.00000000    
   1.00000000    
   4.00000000    
   0.00000000    
   0.00000000    
   1.00000000    
   3.00000000    
   1.00000000    
   1.00000000    
   4.00000000    
   2.00000000    
   0.00000000    
   0.00000000    
   3.00000000    
   2.00000000    
   3.00000000    
   0.00000000    
   0.00000000    
   0.00000000    
   1.00000000    
   4.00000000    
   0.00000000    
   1.00000000    
   0.00000000    
   4.00000000    
   1.00000000    
   2.00000000    
   3.00000000    
   1.00000000    
   1.00000000    
   2.00000000    
   1.00000000    
   1.00000000    
   0.00000000    
   1.00000000    
   1.00000000    
   0.00000000    
   0.00000000    
   0.00000000    
   0.00000000    
   0.00000000    
   0.00000000    
   1.00000000    
   1.00000000    
   2.00000000    
   1.00000000    
   1.00000000    
   0.00000000    
   1.00000000    
   0.00000000    
   2.00000000    
   1.00000000    
   4.00000000    
   0.00000000    
   3.00000000    
   0.00000000    
   3.00000000    
   1.00000000    
   0.00000000    
   1.00000000    
   2.00000000    
   1.00000000    
   3.00000000    
   1.00000000    
   2.00000000    
   2.00000000    
   1.00000000    
   1.00000000    
   4.00000000    
   1.00000000    
   3.00000000    
   3.00000000    
   1.00000000    
   2.00000000    
   0.00000000    
   0.00000000    
   5.00000000    
   3.00000000    
   3.00000000    
   1.00000000    
   2.00000000    
   1.00000000    
   0.00000000    
   0.00000000    
   1.00000000    
   3.00000000    
   3.00000000    
   1.00000000    
   1.00000000    
   1.00000000    
   1.00000000    
   1.00000000    
   0.00000000    
   0.00000000    
   0.00000000    
   3.00000000    
   1.00000000    
   1.00000000    
   0.00000000    
   0.00000000    
   1.00000000    
   1.00000000    
   0.00000000    
   1.00000000    
   2.00000000    
   1.00000000    
   0.00000000    
   1.00000000    
   1.00000000    
   0.00000000    
   2.00000000    
   0.00000000    
   1.00000000    
   1.00000000    
   2.00000000    
   1.00000000    
   0.00000000    
   1.00000000    
   1.00000000    
   1.00000000    
   0.00000000    
   1.00000000    
   1.00000000    
   0.00000000    
   1.00000000    
   1.00000000    
   0.00000000    
   4.00000000    
   1.00000000    
   0.00000000    
   2.00000000    
   0.00000000    
   0.00000000    
   1.00000000    
   4.00000000    
   1.00000000    
   1.00000000    
   1.00000000    
   0.00000000    
   5.00000000    
   2.00000000    
   1.00000000    
   0.00000000    
   2.00000000    
   0.00000000    
   0.00000000    
   2.00000000    
   0.00000000    
   2.00000000    
   3.00000000    
   2.00000000    
   1.00000000    
   2.00000000    
   2.00000000    
   1.00000000    
   1.00000000    
   2.00000000    
   3.00000000    
   2.00000000    
   2.00000000    
   0.00000000    
   2.00000000    
   1.00000000    
   0.00000000    
   0.00000000    
   1.00000000    
   0.00000000    
   2.00000000    
   0.00000000    
   1.00000000    
   1.00000000    
   2.00000000    
   0.00000000    
   1.00000000    
   0.00000000    
   3.00000000    
   2.00000000    
   3.00000000    
   2.00000000    
   0.00000000    
   3.00000000    
   1.00000000    
   1.00000000    
   1.00000000    
   0.00000000    
   2.00000000    
   0.00000000    
   1.00000000    
   0.00000000    
   1.00000000    
   2.00000000    
   2.00000000    
   0.00000000    
   1.00000000    
   2.00000000    
   1.00000000    
   1.00000000    
   4.00000000    
   1.00000000    
   4.00000000    
   3.00000000    
   0.00000000    
   3.00000000    
   3.00000000    
   1.00000000    
   6.00000000    
   5.00000000    
   0.00000000    
   2.00000000    
   2.00000000    
   2.00000000    
   4.00000000    
   2.00000000    
   6.00000000    
   1.00000000    
   1.00000000    
   1.00000000    
   1.00000000    
   2.00000000    
   2.00000000    
   1.00000000    
   1.00000000    
   1.00000000    
   0.00000000    
   2.00000000    
   0.00000000    
   1.00000000    
   0.00000000    
   1.00000000    
   0.00000000    
   0.00000000    
   1.00000000    
   0.00000000    
   1.00000000    
   1.00000000    
   1.00000000    
   1.00000000    
   0.00000000    
   1.00000000    
   0.00000000    
   0.00000000    
   0.00000000    
   1.00000000    
   0.00000000    
   2.00000000    
   1.00000000    
   0.00000000    
   3.00000000    
   1.00000000    
   0.00000000    
   3.00000000    
   1.00000000    
   0.00000000    
   1.00000000    
   0.00000000    
   0.00000000    
   2.00000000    
   3.00000000    
   2.00000000    
   0.00000000    
   1.00000000    
   1.00000000    
   4.00000000    
   1.00000000    
   2.00000000    
   4.00000000    
   2.00000000    
   3.00000000    
   0.00000000    
   5.00000000    
   4.00000000    
   0.00000000    
   0.00000000    
   1.00000000    
   2.00000000    
   1.00000000    
   2.00000000    
   2.00000000    
   1.00000000    
   1.00000000    
   1.00000000    
   1.00000000    
   3.00000000    
   1.00000000    
   1.00000000    
   2.00000000    
   1.00000000    
   0.00000000    
   0.00000000    
   1.00000000    
   0.00000000    
   0.00000000    
   0.00000000    
   1.00000000    
   3.00000000    
   1.00000000    
   2.00000000    
   0.00000000    
   1.00000000    
   1.00000000    
   1.00000000    
   1.00000000    
   1.00000000    
   0.00000000    
   1.00000000    
   1.00000000    
   1.00000000    
   2.00000000    
   1.00000000    
   0.00000000    
   0.00000000    
   1.00000000    
   1.00000000    
   1.00000000    
   0.00000000    
   4.00000000    
   0.00000000    
   1.00000000    
   0.00000000    
   1.00000000    
   2.00000000    
   2.00000000    
   3.00000000    
   3.00000000    
   2.00000000    
   1.00000000    
   2.00000000    
   0.00000000    
   2.00000000    
   3.00000000    
   3.00000000    
   1.00000000    
   2.00000000    
   0.00000000    
   0.00000000    
   6.00000000    
   0.00000000    
   2.00000000    
   3.00000000    
   4.00000000    
   3.00000000    
   0.00000000    
   1.00000000    
   3.00000000    
   1.00000000    
   3.00000000    
   3.00000000    
   1.00000000    
   3.00000000    
   1.00000000    
   0.00000000    
   4.00000000    
   2.00000000    
   3.00000000    
   3.00000000    
   2.00000000    
   1.00000000    
   1.00000000    
   3.00000000    
   0.00000000    
   4.00000000    
   1.00000000    
   4.00000000    
   1.00000000    
   2.00000000    
   1.00000000    
   1.00000000    
   1.00000000    
   4.00000000    
   1.00000000    
   2.00000000    
   1.00000000    
   0.00000000    
   3.00000000    
   0.00000000    
   3.00000000    
   1.00000000    
   2.00000000    
   1.00000000    
   3.00000000    
   1.00000000    
   3.00000000    
   3.00000000    
   1.00000000    
   1.00000000    
   2.00000000    
   0.00000000    
   1.00000000    
   2.00000000    
   3.00000000    
   1.00000000    
   1.00000000    
   1.00000000    
   1.00000000    
   0.00000000    
   0.00000000    
   1.00000000    
   0.00000000    
   2.00000000    
   1.00000000    
   2.00000000    
   6.00000000    
   8.00000000    
   0.00000000    
   6.00000000    
   8.00000000    
   2.00000000    
   2.00000000    
   4.00000000    
   4.00000000    
   0.00000000    
   2.00000000    
   2.00000000    
   4.00000000    
   2.00000000    
   2.00000000    
   2.00000000    
   2.00000000    
   0.00000000    
   0.00000000    
   0.00000000    
   4.00000000    
   2.00000000    
   0.00000000    
   0.00000000    
   2.00000000    
   2.00000000    
   2.00000000    
   2.00000000    
   2.00000000    
   4.00000000    
   4.00000000    
   2.00000000    
   0.00000000    
   0.00000000    
   0.00000000    
   2.00000000    
   6.00000000    
   0.00000000    
   4.00000000    
   0.00000000    
   2.00000000    
   0.00000000    
   4.00000000    
   4.00000000    
   2.00000000    
   0.00000000    
   0.00000000    
   0.00000000    
   0.00000000    
   0.00000000    
   4.00000000    
   4.00000000    
   2.00000000    
   2.00000000    
   2.00000000    
   2.00000000    
   0.00000000    
   0.00000000    
   0.00000000    
   2.00000000    
   0.00000000    
   6.00000000    
   4.00000000    
   3.00000000    
   8.00000000    
   8.00000000    
   3.00000000    
   4.00000000    
   7.00000000    
   3.00000000    
   4.00000000    
   1.00000000    
   2.00000000    
   2.00000000    
   1.00000000    
   2.00000000    
   3.00000000    
   2.00000000    
   0.00000000    
   2.00000000    
   1.00000000    
   1.00000000    
   6.00000000    
   2.00000000    
   1.00000000    
   0.00000000    
   2.00000000    
   1.00000000    
   0.00000000    
   0.00000000    
   2.00000000    
   2.00000000    
   1.00000000    
   1.00000000    
   1.00000000    
   2.00000000    
   3.00000000    
   1.00000000    
   3.00000000    
   1.00000000    
   3.00000000    
   3.00000000    
   3.00000000    
   4.00000000    
   1.00000000    
   3.00000000    
   2.00000000    
   3.00000000    
   4.00000000    
   3.00000000    
   0.00000000    
   0.00000000    
   1.00000000    
   0.00000000    
   2.00000000    
   1.00000000    
   0.00000000    
   2.00000000    
   1.00000000    
   5.00000000    
   3.00000000    
   2.00000000    
   1.00000000    
   3.00000000    
   0.00000000    
   4.00000000    
   1.00000000    
   4.00000000    
   0.00000000    
   3.00000000    
   6.00000000    
   2.00000000    
   1.00000000    
   1.00000000    
   3.00000000    
   4.00000000    
   2.00000000    
   4.00000000    
   3.00000000    
   5.00000000    
   3.00000000    
   5.00000000    
   2.00000000    
   2.00000000    
   4.00000000    
   2.00000000    
   1.00000000    
   4.00000000    
   3.00000000    
   2.00000000    
   4.00000000    
   2.00000000    
   5.00000000    
   2.00000000    
   0.00000000    
   2.00000000    
   1.00000000    
   2.00000000    
   3.00000000    
   1.00000000    
   1.00000000    
   3.00000000    
   0.00000000    
   2.00000000    
   4.00000000    
   6.00000000    
   0.00000000    
   1.00000000    
   1.00000000    
   2.00000000    
   2.00000000    
   1.00000000    
   1.00000000    
   1.00000000    
   0.00000000    
   1.00000000    
   3.00000000    
   4.00000000    
   2.00000000    
   1.00000000    
   0.00000000    
   6.00000000    
   2.00000000    
   1.00000000    
   0.00000000    
   2.00000000    
   2.00000000    
   0.00000000    
   3.00000000    
   3.00000000    
   3.00000000    
   3.00000000    
   6.00000000    
   4.00000000    
   2.00000000    
   2.00000000    
   3.00000000    
   3.00000000    
   2.00000000    
   1.00000000    
   3.00000000    
   1.00000000    
   3.00000000    
   3.00000000    
   3.00000000    
   2.00000000    
   1.00000000    
   2.00000000    
   4.00000000    
   2.00000000    
   2.00000000    
   5.00000000    
   1.00000000    
   2.00000000    
   3.00000000    
   1.00000000    
   3.00000000    
   3.00000000    
   5.00000000    
   1.00000000    
   2.00000000    
   1.00000000    
   2.00000000    
   1.00000000    
   1.00000000    
   0.00000000    
   3.00000000    
   4.00000000    
   0.00000000    
   0.00000000    
   2.00000000    
   3.00000000    
   1.00000000    
   2.00000000    
   1.00000000    
   1.00000000    
   0.00000000    
   3.00000000    
   0.00000000    
   2.00000000    
   3.00000000    
   1.00000000    
   3.00000000    
   2.00000000    
   3.00000000    
   0.00000000    
   1.00000000    
   0.00000000    
   0.00000000    
   0.00000000    
   1.00000000    
   1.00000000    
   3.00000000    
   5.00000000    
   1.00000000    
   0.00000000    
   8.00000000    
   7.00000000    
   1.00000000    
   3.00000000    
   0.00000000    
   5.00000000    
   7.00000000    
   1.00000000    
   2.00000000    
   0.00000000    
   2.00000000    
   2.00000000    
   2.00000000    
   2.00000000    
   4.00000000    
   7.00000000    
   4.00000000    
   1.00000000    
   6.00000000    
   4.00000000    
   2.00000000    
   4.00000000    
   2.00000000    
   2.00000000    
   3.00000000    
   1.00000000    
   0.00000000    
   1.00000000    
   1.00000000    
   7.00000000    
   1.00000000    
   2.00000000    
   3.00000000    
   3.00000000    
   6.00000000    
   1.00000000    
   2.00000000    
   3.00000000    
   3.00000000    
   3.00000000    
   3.00000000    
   3.00000000    
   3.00000000    
   3.00000000    
   1.00000000    
   2.00000000    
   3.00000000    
   1.00000000    
   2.00000000    
   1.00000000    
   2.00000000    
   4.00000000    
   0.00000000    
   2.00000000    
   2.00000000    
   1.00000000    
   2.00000000    
   3.00000000    
   2.00000000    
   3.00000000    
   0.00000000    
   2.00000000    
   2.00000000    
   1.00000000    
   2.00000000    
   3.00000000    
   1.00000000    
   3.00000000    
   5.00000000    
   2.00000000    
   2.00000000    
   4.00000000    
   1.00000000    
   2.00000000    
   2.00000000    
   5.00000000    
   1.00000000    
   2.00000000    
   2.00000000    
   4.00000000    
   0.00000000    
   3.00000000    
   1.00000000    
   2.00000000    
   1.00000000    
   2.00000000    
   3.00000000    
   1.00000000    
   2.00000000    
   1.00000000    
   4.00000000    
   4.00000000    
   4.00000000    
   2.00000000    
   2.00000000    
   3.00000000    
   3.00000000    
   3.00000000    
   2.00000000    
   2.00000000    
   7.00000000    
   3.00000000    
   1.00000000    
   1.00000000    
   1.00000000    
   3.00000000    
   1.00000000    
   4.00000000    
   2.00000000    
   1.00000000    
   2.00000000    
   0.00000000    
   0.00000000    
   0.00000000    
   2.00000000    
   0.00000000    
   0.00000000    
   1.00000000    
   0.00000000    
   1.00000000    
   1.00000000    
   2.00000000    
   2.00000000    
   0.00000000    
   3.00000000    
   2.00000000    
   0.00000000    
   3.00000000    
   2.00000000    
   4.00000000    
   3.00000000    
   2.00000000    
   7.00000000    
   2.00000000    
   8.00000000    
   1.00000000    
   5.00000000    
   3.00000000    
   3.00000000    
   1.00000000    
   1.00000000    
   4.00000000    
   0.00000000    
   2.00000000    
   4.00000000    
   2.00000000    
   2.00000000    
   4.00000000    
   4.00000000    
   5.00000000    
   1.00000000    
   4.00000000    
   2.00000000    
   1.00000000    
   3.00000000    
   3.00000000    
   5.00000000    
   5.00000000    
   1.00000000    
   2.00000000    
   6.00000000    
   1.00000000    
   1.00000000    
   0.00000000    
   1.00000000    
   1.00000000    
   4.00000000    
   3.00000000    
   4.00000000    
   2.00000000    
   1.00000000    
   1.00000000    
   1.00000000    
   1.00000000    
   0.00000000    
   1.00000000    
   2.00000000    
   2.00000000    
   1.00000000    
   0.00000000    
   1.00000000    
   0.00000000    
   1.00000000    
   1.00000000    
   0.00000000    
   2.00000000    
   3.00000000    
   3.00000000    
   3.00000000    
   0.00000000    
   1.00000000    
   1.00000000    
   4.00000000    
   1.00000000    
   4.00000000    
   1.00000000    
   1.00000000    
   4.00000000    
   1.00000000    
   2.00000000    
   3.00000000    
   3.00000000    
   6.00000000    
   4.00000000    
   1.00000000    
   3.00000000    
   3.00000000    
   4.00000000    
   0.00000000    
   1.00000000    
   2.00000000    
   2.00000000    
   0.00000000    
   4.00000000    
   4.00000000    
   3.00000000    
   1.00000000    
   1.00000000    
   4.00000000    
   3.00000000    
   4.00000000    
   2.00000000    
   1.00000000    
   3.00000000    
   1.00000000    
   1.00000000    
   2.00000000    
   2.00000000    
   1.00000000    
   1.00000000    
   2.00000000    
   2.00000000    
   3.00000000    
   1.00000000    
   3.00000000    
   1.00000000    
   1.00000000    
   3.00000000    
   2.00000000    
   1.00000000    
   0.00000000    
   0.00000000    
   0.00000000    
   1.00000000    
   0.00000000    
   0.00000000    
   1.00000000    
   0.00000000    
   1.00000000    
   3.00000000    
   3.00000000    
   2.00000000    
   6.00000000    
   0.00000000    
   0.00000000    
   3.00000000    
   4.00000000    
   2.00000000    
   2.00000000    
   3.00000000    
   2.00000000    
   1.00000000    
   5.00000000    
   3.00000000    
   10.0000000    
   3.00000000    
   3.00000000    
   3.00000000    
   6.00000000    
   3.00000000    
   3.00000000    
   1.00000000    
   4.00000000    
   5.00000000    
   4.00000000    
   5.00000000    
   2.00000000    
   4.00000000    
   4.00000000    
   1.00000000    
   1.00000000    
   2.00000000    
   1.00000000    
   3.00000000    
   1.00000000    
   4.00000000    
   2.00000000    
   5.00000000    
   3.00000000    
   2.00000000    
   5.00000000    
   0.00000000    
   3.00000000    
   3.00000000    
   2.00000000    
   1.00000000    
   0.00000000    
   1.00000000    
   5.00000000    
   0.00000000    
   3.00000000    
   3.00000000    
   3.00000000    
   1.00000000    
   2.00000000    
   2.00000000    
   1.00000000    
   1.00000000    
   1.00000000    
   1.00000000    
   0.00000000    
   2.00000000    
   0.00000000    
   0.00000000    
   2.00000000    
   3.00000000    
   0.00000000    
   0.00000000    
   1.00000000    
   3.00000000    
   0.00000000    
   2.00000000    
   4.00000000    
   1.00000000    
   0.00000000    
   2.00000000    
   3.00000000    
   3.00000000    
   3.00000000    
   6.00000000    
   4.00000000    
   5.00000000    
   1.00000000    
   4.00000000    
   1.00000000    
   2.00000000    
   5.00000000    
   3.00000000    
   1.00000000    
   6.00000000    
   5.00000000    
   1.00000000    
   2.00000000    
   1.00000000    
   3.00000000    
   5.00000000    
   4.00000000    
   2.00000000    
   0.00000000    
   4.00000000    
   4.00000000    
   1.00000000    
   0.00000000    
   3.00000000    
   2.00000000    
   2.00000000    
   0.00000000    
   3.00000000    
   4.00000000    
   2.00000000    
   4.00000000    
   3.00000000    
   1.00000000    
   1.00000000    
   1.00000000    
   2.00000000    
   1.00000000    
   1.00000000    
   1.00000000    
   1.00000000    
   0.00000000    
   0.00000000    
   3.00000000    
   2.00000000    
   1.00000000    
   1.00000000    
   0.00000000    
   1.00000000    
   0.00000000    
   2.00000000    
   0.00000000    
   0.00000000    
   2.00000000    
   1.00000000    
   2.00000000    
   1.00000000    
   3.00000000    
   3.00000000    
   2.00000000    
   2.00000000    
   3.00000000    
   6.00000000    
   3.00000000    
   4.00000000    
   2.00000000    
   7.00000000    
   2.00000000    
   6.00000000    
   6.00000000    
   1.00000000    
   2.00000000    
   7.00000000    
   1.00000000    
   1.00000000    
   2.00000000    
   1.00000000    
   4.00000000    
   3.00000000    
   1.00000000    
   3.00000000    
   4.00000000    
   5.00000000    
   1.00000000    
   3.00000000    
   4.00000000    
   4.00000000    
   2.00000000    
   1.00000000    
   5.00000000    
   2.00000000    
   6.00000000    
   4.00000000    
   2.00000000    
   3.00000000    
   1.00000000    
   2.00000000    
   1.00000000    
   1.00000000    
   3.00000000    
   2.00000000    
   2.00000000    
   2.00000000    
   1.00000000    
   0.00000000    
   2.00000000    
   1.00000000    
   0.00000000    
   2.00000000    
   0.00000000    
   3.00000000    
   0.00000000    
   0.00000000    
   0.00000000    
   2.00000000    
   4.00000000    
   2.00000000    
   1.00000000    
   3.00000000    
   2.00000000    
   2.00000000    
   5.00000000    
   3.00000000    
   2.00000000    
   5.00000000    
   1.00000000    
   4.00000000    
   3.00000000    
   5.00000000    
   7.00000000    
   6.00000000    
   2.00000000    
   3.00000000    
   3.00000000    
   2.00000000    
   1.00000000    
   3.00000000    
   4.00000000    
   3.00000000    
   3.00000000    
   1.00000000    
   7.00000000    
   4.00000000    
   3.00000000    
   5.00000000    
   2.00000000    
   3.00000000    
   4.00000000    
   14.0000000    
   8.00000000    
   9.00000000    
   11.0000000    
   5.00000000    
   4.00000000    
   2.00000000    
   1.00000000    
   4.00000000    
   2.00000000    
   4.00000000    
   3.00000000    
   4.00000000    
   1.00000000    
   0.00000000    
   3.00000000    
   0.00000000    
   2.00000000    
   0.00000000    
   1.00000000    
   2.00000000    
   1.00000000    
   3.00000000    
   0.00000000    
   2.00000000    
   0.00000000    
   1.00000000    
   0.00000000    
   3.00000000    
   1.00000000    
   0.00000000    
   0.00000000    
   2.00000000    
   1.00000000    
   1.00000000    
   4.00000000    
   3.00000000    
   3.00000000    
   3.00000000    
   2.00000000    
   1.00000000    
   1.00000000    
   1.00000000    
   6.00000000    
   1.00000000    
   2.00000000    
   2.00000000    
   2.00000000    
   2.00000000    
   2.00000000    
   6.00000000    
   5.00000000    
   2.00000000    
   4.00000000    
   1.00000000    
   3.00000000    
   3.00000000    
   1.00000000    
   2.00000000    
   4.00000000    
   3.00000000    
   2.00000000    
   3.00000000    
   4.00000000    
   14.0000000    
   17.0000000    
   5.00000000    
   14.0000000    
   7.00000000    
   6.00000000    
   2.00000000    
   3.00000000    
   1.00000000    
   2.00000000    
   2.00000000    
   4.00000000    
   2.00000000    
   0.00000000    
   3.00000000    
   0.00000000    
   0.00000000    
   1.00000000    
   1.00000000    
   1.00000000    
   0.00000000    
   4.00000000    
   4.00000000    
   1.00000000    
   2.00000000    
   2.00000000    
   1.00000000    
   1.00000000    
   0.00000000    
   1.00000000    
   1.00000000    
   0.00000000    
   3.00000000    
   3.00000000    
   0.00000000    
   2.00000000    
   2.00000000    
   5.00000000    
   2.00000000    
   2.00000000    
   2.00000000    
   4.00000000    
   3.00000000    
   3.00000000    
   4.00000000    
   6.00000000    
   3.00000000    
   2.00000000    
   2.00000000    
   2.00000000    
   5.00000000    
   3.00000000    
   2.00000000    
   2.00000000    
   2.00000000    
   3.00000000    
   1.00000000    
   5.00000000    
   0.00000000    
   2.00000000    
   9.00000000    
   9.00000000    
   7.00000000    
   10.0000000    
   21.0000000    
   16.0000000    
   17.0000000    
   13.0000000    
   4.00000000    
   4.00000000    
   2.00000000    
   3.00000000    
   2.00000000    
   3.00000000    
   3.00000000    
   3.00000000    
   3.00000000    
   3.00000000    
   1.00000000    
   0.00000000    
   4.00000000    
   1.00000000    
   2.00000000    
   0.00000000    
   1.00000000    
   2.00000000    
   0.00000000    
   4.00000000    
   0.00000000    
   2.00000000    
   1.00000000    
   2.00000000    
   3.00000000    
   0.00000000    
   0.00000000    
   0.00000000    
   3.00000000    
   0.00000000    
   4.00000000    
   2.00000000    
   0.00000000    
   2.00000000    
   1.00000000    
   4.00000000    
   2.00000000    
   0.00000000    
   3.00000000    
   3.00000000    
   1.00000000    
   6.00000000    
   3.00000000    
   2.00000000    
   2.00000000    
   6.00000000    
   0.00000000    
   2.00000000    
   3.00000000    
   1.00000000    
   3.00000000    
   3.00000000    
   1.00000000    
   3.00000000    
   1.00000000    
   3.00000000    
   4.00000000    
   4.00000000    
   4.00000000    
   17.0000000    
   18.0000000    
   25.0000000    
   18.0000000    
   17.0000000    
   10.0000000    
   6.00000000    
   6.00000000    
   3.00000000    
   5.00000000    
   0.00000000    
   3.00000000    
   3.00000000    
   3.00000000    
   3.00000000    
   3.00000000    
   1.00000000    
   0.00000000    
   0.00000000    
   2.00000000    
   4.00000000    
   1.00000000    
   4.00000000    
   0.00000000    
   4.00000000    
   4.00000000    
   1.00000000    
   1.00000000    
   1.00000000    
   1.00000000    
   1.00000000    
   0.00000000    
   1.00000000    
   0.00000000    
   0.00000000    
   2.00000000    
   2.00000000    
   2.00000000    
   2.00000000    
   2.00000000    
   7.00000000    
   4.00000000    
   2.00000000    
   4.00000000    
   1.00000000    
   2.00000000    
   1.00000000    
   2.00000000    
   6.00000000    
   5.00000000    
   0.00000000    
   2.00000000    
   2.00000000    
   1.00000000    
   4.00000000    
   1.00000000    
   0.00000000    
   3.00000000    
   2.00000000    
   0.00000000    
   4.00000000    
   3.00000000    
   4.00000000    
   3.00000000    
   6.00000000    
   12.0000000    
   10.0000000    
   12.0000000    
   18.0000000    
   7.00000000    
   5.00000000    
   0.00000000    
   0.00000000    
   0.00000000    
   4.00000000    
   1.00000000    
   6.00000000    
   2.00000000    
   3.00000000    
   1.00000000    
   2.00000000    
   2.00000000    
   1.00000000    
   0.00000000    
   1.00000000    
   1.00000000    
   3.00000000    
   4.00000000    
   1.00000000    
   2.00000000    
   2.00000000    
   1.00000000    
   1.00000000    
   1.00000000    
   1.00000000    
   0.00000000    
   4.00000000    
   0.00000000    
   1.00000000    
   3.00000000    
   2.00000000    
   1.00000000    
   4.00000000    
   4.00000000    
   4.00000000    
   0.00000000    
   4.00000000    
   0.00000000    
   4.00000000    
   5.00000000    
   2.00000000    
   1.00000000    
   5.00000000    
   3.00000000    
   2.00000000    
   2.00000000    
   4.00000000    
   1.00000000    
   2.00000000    
   1.00000000    
   1.00000000    
   2.00000000    
   2.00000000    
   0.00000000    
   3.00000000    
   1.00000000    
   6.00000000    
   3.00000000    
   4.00000000    
   9.00000000    
   14.0000000    
   17.0000000    
   9.00000000    
   9.00000000    
   4.00000000    
   2.00000000    
   4.00000000    
   1.00000000    
   3.00000000    
   3.00000000    
   1.00000000    
   0.00000000    
   1.00000000    
   2.00000000    
   1.00000000    
   3.00000000    
   0.00000000    
   2.00000000    
   2.00000000    
   1.00000000    
   0.00000000    
   1.00000000    
   2.00000000    
   1.00000000    
   1.00000000    
   0.00000000    
   0.00000000    
   1.00000000    
   0.00000000    
   1.00000000    
   1.00000000    
   1.00000000    
   1.00000000    
   3.00000000    
   0.00000000    
   1.00000000    
   2.00000000    
   2.00000000    
   1.00000000    
   3.00000000    
   2.00000000    
   1.00000000    
   5.00000000    
   3.00000000    
   7.00000000    
   3.00000000    
   2.00000000    
   2.00000000    
   3.00000000    
   1.00000000    
   1.00000000    
   4.00000000    
   3.00000000    
   7.00000000    
   1.00000000    
   1.00000000    
   1.00000000    
   1.00000000    
   1.00000000    
   4.00000000    
   4.00000000    
   4.00000000    
   7.00000000    
   4.00000000    
   10.0000000    
   7.00000000    
   7.00000000    
   3.00000000    
   4.00000000    
   2.00000000    
   3.00000000    
   2.00000000    
   2.00000000    
   3.00000000    
   0.00000000    
   4.00000000    
   1.00000000    
   3.00000000    
   0.00000000    
   0.00000000    
   1.00000000    
   4.00000000    
   1.00000000    
   1.00000000    
   1.00000000    
   1.00000000    
   1.00000000    
   0.00000000    
   2.00000000    
   0.00000000    
   3.00000000    
   1.00000000    
   0.00000000    
   0.00000000    
   0.00000000    
   0.00000000    
   0.00000000    
   2.00000000    
   0.00000000    
   6.00000000    
   1.00000000    
   2.00000000    
   6.00000000    
   1.00000000    
   2.00000000    
   2.00000000    
   4.00000000    
   1.00000000    
   1.00000000    
   4.00000000    
   4.00000000    
   2.00000000    
   1.00000000    
   4.00000000    
   2.00000000    
   3.00000000    
   4.00000000    
   2.00000000    
   4.00000000    
   2.00000000    
   0.00000000    
   0.00000000    
   4.00000000    
   4.00000000    
   3.00000000    
   1.00000000    
   2.00000000    
   8.00000000    
   6.00000000    
   4.00000000    
   5.00000000    
   4.00000000    
   2.00000000    
   1.00000000    
   2.00000000    
   1.00000000    
   2.00000000    
   0.00000000    
   1.00000000    
   1.00000000    
   2.00000000    
   3.00000000    
   1.00000000    
   1.00000000    
   3.00000000    
   1.00000000    
   1.00000000    
   2.00000000    
   2.00000000    
   1.00000000    
   2.00000000    
   0.00000000    
   1.00000000    
   2.00000000    
   2.00000000    
   2.00000000    
   2.00000000    
   2.00000000    
   1.00000000    
   0.00000000    
   0.00000000    
   1.00000000    
   0.00000000    
   2.00000000    
   4.00000000    
   5.00000000    
   4.00000000    
   2.00000000    
   4.00000000    
   2.00000000    
   5.00000000    
   6.00000000    
   1.00000000    
   3.00000000    
   1.00000000    
   2.00000000    
   3.00000000    
   1.00000000    
   1.00000000    
   7.00000000    
   2.00000000    
   2.00000000    
   2.00000000    
   1.00000000    
   1.00000000    
   0.00000000    
   3.00000000    
   2.00000000    
   6.00000000    
   9.00000000    
   3.00000000    
   5.00000000    
   4.00000000    
   7.00000000    
   2.00000000    
   0.00000000    
   3.00000000    
   1.00000000    
   2.00000000    
   1.00000000    
   1.00000000    
   0.00000000    
   0.00000000    
   0.00000000    
   1.00000000    
   1.00000000    
   0.00000000    
   2.00000000    
   1.00000000    
   2.00000000    
   2.00000000    
   1.00000000    
   0.00000000    
   1.00000000    
   1.00000000    
   2.00000000    
   2.00000000    
   3.00000000    
   0.00000000    
   1.00000000    
   1.00000000    
   0.00000000    
   1.00000000    
   0.00000000    
   1.00000000    
   1.00000000    
   4.00000000    
   1.00000000    
   3.00000000    
   1.00000000    
   2.00000000    
   1.00000000    
   4.00000000    
   0.00000000    
   2.00000000    
   5.00000000    
   2.00000000    
   3.00000000    
   3.00000000    
   3.00000000    
   3.00000000    
   0.00000000    
   1.00000000    
   1.00000000    
   4.00000000    
   2.00000000    
   4.00000000    
   1.00000000    
   1.00000000    
   3.00000000    
   7.00000000    
   2.00000000    
   2.00000000    
   7.00000000    
   5.00000000    
   5.00000000    
   10.0000000    
   4.00000000    
   3.00000000    
   2.00000000    
   1.00000000    
   1.00000000    
   4.00000000    
   2.00000000    
   3.00000000    
   2.00000000    
   0.00000000    
   1.00000000    
   2.00000000    
   1.00000000    
   0.00000000    
   2.00000000    
   1.00000000    
   0.00000000    
   0.00000000    
   1.00000000    
   2.00000000    
   1.00000000    
   4.00000000    
   1.00000000    
   1.00000000    
   3.00000000    
   1.00000000    
   1.00000000    
   1.00000000    
   2.00000000    
   2.00000000    
   0.00000000    
   0.00000000    
   3.00000000    
   2.00000000    
   0.00000000    
   2.00000000    
   2.00000000    
   4.00000000    
   2.00000000    
   5.00000000    
   4.00000000    
   4.00000000    
   1.00000000    
   1.00000000    
   1.00000000    
   3.00000000    
   1.00000000    
   1.00000000    
   3.00000000    
   2.00000000    
   1.00000000    
   2.00000000    
   1.00000000    
   1.00000000    
   0.00000000    
   0.00000000    
   1.00000000    
   4.00000000    
   2.00000000    
   4.00000000    
   4.00000000    
   5.00000000    
   1.00000000    
   4.00000000    
   3.00000000    
   7.00000000    
   1.00000000    
   2.00000000    
   2.00000000    
   1.00000000    
   3.00000000    
   2.00000000    
   1.00000000    
   1.00000000    
   2.00000000    
   2.00000000    
   1.00000000    
   1.00000000    
   2.00000000    
   2.00000000    
   2.00000000    
   1.00000000    
   0.00000000    
   1.00000000    
   1.00000000    
   0.00000000    
   1.00000000    
   0.00000000    
   1.00000000    
   1.00000000    
   1.00000000    
   0.00000000    
   0.00000000    
   1.00000000    
   0.00000000    
   1.00000000    
   0.00000000    
   0.00000000    
   2.00000000    
   4.00000000    
   3.00000000    
   2.00000000    
   3.00000000    
   1.00000000    
   4.00000000    
   4.00000000    
   2.00000000    
   4.00000000    
   7.00000000    
   1.00000000    
   5.00000000    
   3.00000000    
   2.00000000    
   2.00000000    
   1.00000000    
   0.00000000    
   1.00000000    
   1.00000000    
   0.00000000    
   4.00000000    
   1.00000000    
   3.00000000    
   2.00000000    
   2.00000000    
   4.00000000    
   2.00000000    
   6.00000000    
   2.00000000    
   2.00000000    
   5.00000000    
   2.00000000    
   3.00000000    
   5.00000000    
   3.00000000    
   1.00000000    
   0.00000000    
   1.00000000    
   5.00000000    
   4.00000000    
   1.00000000    
   4.00000000    
   1.00000000    
   1.00000000    
   3.00000000    
   0.00000000    
   1.00000000    
   1.00000000    
   1.00000000    
   3.00000000    
   1.00000000    
   2.00000000    
   4.00000000    
   1.00000000    
   2.00000000    
   5.00000000    
   0.00000000    
   0.00000000    
   1.00000000    
   0.00000000    
   0.00000000    
   4.00000000    
   0.00000000    
   1.00000000    
   2.00000000    
   1.00000000    
   2.00000000    
   1.00000000    
   4.00000000    
   3.00000000    
   1.00000000    
   1.00000000    
   3.00000000    
   4.00000000    
   2.00000000    
   0.00000000    
   1.00000000    
   0.00000000    
   0.00000000    
   1.00000000    
   0.00000000    
   0.00000000    
   3.00000000    
   1.00000000    
   1.00000000    
   0.00000000    
   2.00000000    
   2.00000000    
   4.00000000    
   5.00000000    
   2.00000000    
   4.00000000    
   3.00000000    
   1.00000000    
   4.00000000    
   2.00000000    
   1.00000000    
   3.00000000    
   3.00000000    
   0.00000000    
   1.00000000    
   2.00000000    
   1.00000000    
   3.00000000    
   1.00000000    
   3.00000000    
   0.00000000    
   4.00000000    
   0.00000000    
   1.00000000    
   1.00000000    
   1.00000000    
   1.00000000    
   0.00000000    
   0.00000000    
   2.00000000    
   0.00000000    
   0.00000000    
   1.00000000    
   2.00000000    
   1.00000000    
   2.00000000    
   0.00000000    
   1.00000000    
   0.00000000    
   1.00000000    
   2.00000000    
   0.00000000    
   5.00000000    
   3.00000000    
   3.00000000    
   2.00000000    
   2.00000000    
   1.00000000    
   1.00000000    
   3.00000000    
   1.00000000    
   3.00000000    
   4.00000000    
   2.00000000    
   3.00000000    
   4.00000000    
   3.00000000    
   1.00000000    
   4.00000000    
   3.00000000    
   7.00000000    
   4.00000000    
   3.00000000    
   2.00000000    
   2.00000000    
   2.00000000    
   2.00000000    
   1.00000000    
   4.00000000    
   3.00000000    
   2.00000000    
   4.00000000    
   3.00000000    
   2.00000000    
   2.00000000    
   0.00000000    
   1.00000000    
   3.00000000    
   4.00000000    
   0.00000000    
   0.00000000    
   1.00000000    
   3.00000000    
   2.00000000    
   1.00000000    
   1.00000000    
   3.00000000    
   2.00000000    
   1.00000000    
   2.00000000    
   1.00000000    
   0.00000000    
   0.00000000    
   1.00000000    
   1.00000000    
   1.00000000    
   2.00000000    
   0.00000000    
   2.00000000    
   0.00000000    
   1.00000000    
   1.00000000    
   1.00000000    
   4.00000000    
   2.00000000    
   0.00000000    
   2.00000000    
   3.00000000    
   1.00000000    
   1.00000000    
   1.00000000    
   1.00000000    
   2.00000000    
   5.00000000    
   3.00000000    
   5.00000000    
   3.00000000    
   9.00000000    
   4.00000000    
   3.00000000    
   1.00000000    
   4.00000000    
   4.00000000    
   2.00000000    
   2.00000000    
   2.00000000    
   2.00000000    
   2.00000000    
   2.00000000    
   0.00000000    
   3.00000000    
   3.00000000    
   3.00000000    
   3.00000000    
   2.00000000    
   5.00000000    
   1.00000000    
   5.00000000    
   1.00000000    
   1.00000000    
   3.00000000    
   1.00000000    
   1.00000000    
   1.00000000    
   2.00000000    
   1.00000000    
   3.00000000    
   4.00000000    
   1.00000000    
   0.00000000    
   3.00000000    
   3.00000000    
   1.00000000    
   0.00000000    
   2.00000000    
   1.00000000    
   1.00000000    
   4.00000000    
   1.00000000    
   2.00000000    
   2.00000000    
   0.00000000    
   0.00000000    
   0.00000000    
   2.00000000    
   1.00000000    
   0.00000000    
   1.00000000    
   2.00000000    
   2.00000000    
   0.00000000    
   5.00000000    
   0.00000000    
   4.00000000    
   3.00000000    
   4.00000000    
   1.00000000    
   4.00000000    
   4.00000000    
   2.00000000    
   2.00000000    
   9.00000000    
   4.00000000    
   4.00000000    
   6.00000000    
   4.00000000    
   3.00000000    
   6.00000000    
   2.00000000    
   4.00000000    
   2.00000000    
   4.00000000    
   2.00000000    
   3.00000000    
   2.00000000    
   3.00000000    
   5.00000000    
   3.00000000    
   2.00000000    
   0.00000000    
   1.00000000    
   2.00000000    
   1.00000000    
   3.00000000    
   0.00000000    
   1.00000000    
   5.00000000    
   5.00000000    
   4.00000000    
   2.00000000    
   1.00000000    
   2.00000000    
   3.00000000    
   2.00000000    
   1.00000000    
   7.00000000    
   3.00000000    
   3.00000000    
   2.00000000    
   4.00000000    
   4.00000000    
   3.00000000    
   3.00000000    
   2.00000000    
   1.00000000    
   1.00000000    
   2.00000000    
   0.00000000    
   1.00000000    
   1.00000000    
   0.00000000    
   2.00000000    
   2.00000000    
   2.00000000    
   2.00000000    
   1.00000000    
   1.00000000    
   4.00000000    
   3.00000000    
   3.00000000    
   3.00000000    
   2.00000000    
   5.00000000    
   3.00000000    
   3.00000000    
   7.00000000    
   4.00000000    
   3.00000000    
   3.00000000    
   4.00000000    
   1.00000000    
   9.00000000    
   7.00000000    
   4.00000000    
   4.00000000    
   5.00000000    
   1.00000000    
   3.00000000    
   3.00000000    
   6.00000000    
   2.00000000    
   3.00000000    
   4.00000000    
   4.00000000    
   6.00000000    
   3.00000000    
   1.00000000    
   2.00000000    
   2.00000000    
   3.00000000    
   2.00000000    
   2.00000000    
   2.00000000    
   2.00000000    
   1.00000000    
   2.00000000    
   2.00000000    
   2.00000000    
   9.00000000    
   10.0000000    
   3.00000000    
   2.00000000    
   4.00000000    
   2.00000000    
   1.00000000    
   7.00000000    
   5.00000000    
   2.00000000    
   3.00000000    
   0.00000000    
   1.00000000    
   1.00000000    
   1.00000000    
   0.00000000    
   1.00000000    
   1.00000000    
   2.00000000    
   1.00000000    
   1.00000000    
   2.00000000    
   1.00000000    
   4.00000000    
   5.00000000    
   4.00000000    
   1.00000000    
   0.00000000    
   1.00000000    
   4.00000000    
   4.00000000    
   10.0000000    
   17.0000000    
   6.00000000    
   4.00000000    
   7.00000000    
   2.00000000    
   3.00000000    
   5.00000000    
   5.00000000    
   2.00000000    
   2.00000000    
   4.00000000    
   3.00000000    
   5.00000000    
   2.00000000    
   2.00000000    
   1.00000000    
   2.00000000    
   2.00000000    
   1.00000000    
   5.00000000    
   0.00000000    
   2.00000000    
   1.00000000    
   2.00000000    
   1.00000000    
   2.00000000    
   3.00000000    
   2.00000000    
   3.00000000    
   5.00000000    
   6.00000000    
   5.00000000    
   10.0000000    
   13.0000000    
   10.0000000    
   4.00000000    
   5.00000000    
   2.00000000    
   4.00000000    
   5.00000000    
   2.00000000    
   2.00000000    
   0.00000000    
   1.00000000    
   4.00000000    
   0.00000000    
   1.00000000    
   2.00000000    
   0.00000000    
   1.00000000    
   4.00000000    
   1.00000000    
   2.00000000    
   1.00000000    
   7.00000000    
   2.00000000    
   5.00000000    
   2.00000000    
   4.00000000    
   4.00000000    
   3.00000000    
   14.0000000    
   14.0000000    
   21.0000000    
   18.0000000    
   12.0000000    
   9.00000000    
   4.00000000    
   8.00000000    
   5.00000000    
   5.00000000    
   1.00000000    
   6.00000000    
   4.00000000    
   3.00000000    
   3.00000000    
   3.00000000    
   3.00000000    
   1.00000000    
   4.00000000    
   6.00000000    
   4.00000000    
   4.00000000    
   3.00000000    
   2.00000000    
   1.00000000    
   0.00000000    
   1.00000000    
   2.00000000    
   4.00000000    
   2.00000000    
   1.00000000    
   3.00000000    
   6.00000000    
   7.00000000    
   17.0000000    
   10.0000000    
   16.0000000    
   12.0000000    
   10.0000000    
   4.00000000    
   2.00000000    
   1.00000000    
   1.00000000    
   2.00000000    
   2.00000000    
   2.00000000    
   0.00000000    
   1.00000000    
   1.00000000    
   2.00000000    
   0.00000000    
   1.00000000    
   1.00000000    
   4.00000000    
   1.00000000    
   3.00000000    
   2.00000000    
   1.00000000    
   2.00000000    
   1.00000000    
   1.00000000    
   2.00000000    
   4.00000000    
   4.00000000    
   8.00000000    
   17.0000000    
   16.0000000    
   25.0000000    
   10.0000000    
   14.0000000    
   10.0000000    
   6.00000000    
   4.00000000    
   10.0000000    
   4.00000000    
   2.00000000    
   3.00000000    
   2.00000000    
   2.00000000    
   2.00000000    
   4.00000000    
   2.00000000    
   6.00000000    
   2.00000000    
   2.00000000    
   4.00000000    
   2.00000000    
   3.00000000    
   0.00000000    
   1.00000000    
   2.00000000    
   3.00000000    
   7.00000000    
   0.00000000    
   1.00000000    
   2.00000000    
   5.00000000    
   5.00000000    
   18.0000000    
   18.0000000    
   19.0000000    
   16.0000000    
   16.0000000    
   7.00000000    
   2.00000000    
   5.00000000    
   3.00000000    
   0.00000000    
   1.00000000    
   1.00000000    
   1.00000000    
   2.00000000    
   1.00000000    
   2.00000000    
   0.00000000    
   1.00000000    
   4.00000000    
   2.00000000    
   2.00000000    
   1.00000000    
   1.00000000    
   2.00000000    
   3.00000000    
   2.00000000    
   3.00000000    
   5.00000000    
   1.00000000    
   4.00000000    
   9.00000000    
   5.00000000    
   17.0000000    
   18.0000000    
   12.0000000    
   17.0000000    
   7.00000000    
   4.00000000    
   7.00000000    
   4.00000000    
   3.00000000    
   2.00000000    
   1.00000000    
   4.00000000    
   5.00000000    
   0.00000000    
   4.00000000    
   2.00000000    
   4.00000000    
   2.00000000    
   4.00000000    
   5.00000000    
   1.00000000    
   2.00000000    
   0.00000000    
   0.00000000    
   2.00000000    
   0.00000000    
   3.00000000    
   2.00000000    
   1.00000000    
   0.00000000    
   3.00000000    
   10.0000000    
   18.0000000    
   21.0000000    
   14.0000000    
   11.0000000    
   13.0000000    
   5.00000000    
   4.00000000    
   4.00000000    
   1.00000000    
   1.00000000    
   1.00000000    
   0.00000000    
   0.00000000    
   1.00000000    
   3.00000000    
   2.00000000    
   1.00000000    
   1.00000000    
   1.00000000    
   0.00000000    
   3.00000000    
   1.00000000    
   1.00000000    
   3.00000000    
   3.00000000    
   6.00000000    
   1.00000000    
   3.00000000    
   0.00000000    
   2.00000000    
   11.0000000    
   14.0000000    
   13.0000000    
   17.0000000    
   18.0000000    
   9.00000000    
   7.00000000    
   5.00000000    
   2.00000000    
   3.00000000    
   7.00000000    
   5.00000000    
   4.00000000    
   3.00000000    
   1.00000000    
   1.00000000    
   6.00000000    
   1.00000000    
   4.00000000    
   4.00000000    
   5.00000000    
   4.00000000    
   0.00000000    
   1.00000000    
   3.00000000    
   4.00000000    
   3.00000000    
   0.00000000    
   2.00000000    
   1.00000000    
   0.00000000    
   5.00000000    
   2.00000000    
   9.00000000    
   12.0000000    
   14.0000000    
   10.0000000    
   11.0000000    
   2.00000000    
   8.00000000    
   1.00000000    
   0.00000000    
   1.00000000    
   4.00000000    
   2.00000000    
   2.00000000    
   0.00000000    
   2.00000000    
   2.00000000    
   0.00000000    
   1.00000000    
   0.00000000    
   2.00000000    
   0.00000000    
   1.00000000    
   3.00000000    
   0.00000000    
   3.00000000    
   3.00000000    
   1.00000000    
   1.00000000    
   2.00000000    
   3.00000000    
   1.00000000    
   5.00000000    
   7.00000000    
   4.00000000    
   10.0000000    
   7.00000000    
   9.00000000    
   3.00000000    
   4.00000000    
   0.00000000    
   2.00000000    
   1.00000000    
   2.00000000    
   2.00000000    
   2.00000000    
   5.00000000    
   2.00000000    
   3.00000000    
   5.00000000    
   3.00000000    
   2.00000000    
   1.00000000    
   0.00000000    
   4.00000000    
   2.00000000    
   0.00000000    
   0.00000000    
   1.00000000    
   0.00000000    
   0.00000000    
   2.00000000    
   2.00000000    
   1.00000000    
   4.00000000    
   2.00000000    
   8.00000000    
   10.0000000    
   12.0000000    
   7.00000000    
   3.00000000    
   7.00000000    
   1.00000000    
   4.00000000    
   2.00000000    
   1.00000000    
   0.00000000    
   1.00000000    
   1.00000000    
   1.00000000    
   2.00000000    
   2.00000000    
   1.00000000    
   0.00000000    
   1.00000000    
   0.00000000    
   3.00000000    
   0.00000000    
   3.00000000    
   6.00000000    
   2.00000000    
   1.00000000    
   2.00000000    
   5.00000000    
   2.00000000    
   5.00000000    
   4.00000000    
   6.00000000    
   4.00000000    
   6.00000000    
   5.00000000    
   4.00000000    
   4.00000000    
   2.00000000    
   3.00000000    
   1.00000000    
   2.00000000    
   3.00000000    
   1.00000000    
   2.00000000    
   1.00000000    
   1.00000000    
   1.00000000    
   0.00000000    
   2.00000000    
   3.00000000    
   2.00000000    
   1.00000000    
   2.00000000    
   0.00000000    
   2.00000000    
   0.00000000    
   3.00000000    
   2.00000000    
   0.00000000    
   2.00000000    
   1.00000000    
   3.00000000    
   0.00000000    
   3.00000000    
   5.00000000    
   4.00000000    
   7.00000000    
   5.00000000    
   3.00000000    
   1.00000000    
   4.00000000    
   2.00000000    
   1.00000000    
   3.00000000    
   2.00000000    
   3.00000000    
   0.00000000    
   1.00000000    
   0.00000000    
   3.00000000    
   0.00000000    
   1.00000000    
   0.00000000    
   2.00000000    
   1.00000000    
   2.00000000    
   4.00000000    
   1.00000000    
   2.00000000    
   0.00000000    
   2.00000000    
   0.00000000    
   2.00000000    
   2.00000000    
   2.00000000    
   2.00000000    
   2.00000000    
   6.00000000    
   0.00000000    
   2.00000000    
   2.00000000    
   1.00000000    
   1.00000000    
   1.00000000    
   2.00000000    
   5.00000000    
   3.00000000    
   0.00000000    
   1.00000000    
   3.00000000    
   2.00000000    
   2.00000000    
   1.00000000    
   0.00000000    
   0.00000000    
   3.00000000    
   0.00000000    
   2.00000000    
   0.00000000    
   1.00000000    
   2.00000000    
   5.00000000    
   1.00000000    
   0.00000000    
   0.00000000    
   3.00000000    
   0.00000000    
   0.00000000    
   1.00000000    
   5.00000000    
   2.00000000    
   3.00000000    
   1.00000000    
   2.00000000    
   2.00000000    
   3.00000000    
   2.00000000    
   2.00000000    
   1.00000000    
   1.00000000    
   0.00000000    
   2.00000000    
   3.00000000    
   0.00000000    
   1.00000000    
   0.00000000    
   3.00000000    
   6.00000000    
   3.00000000    
   4.00000000    
   0.00000000    
   2.00000000    
   7.00000000    
   1.00000000    
   1.00000000    
   3.00000000    
   0.00000000    
   6.00000000    
   1.00000000    
   3.00000000    
   3.00000000    
   3.00000000    
   0.00000000    
   4.00000000    
   3.00000000    
   2.00000000    
   2.00000000    
   4.00000000    
   1.00000000    
   3.00000000    
   3.00000000    
   1.00000000    
   3.00000000    
   0.00000000    
   2.00000000    
   1.00000000    
   0.00000000    
   1.00000000    
   0.00000000    
   4.00000000    
   0.00000000    
   0.00000000    
   1.00000000    
   2.00000000    
   1.00000000    
   2.00000000    
   4.00000000    
   4.00000000    
   1.00000000    
   0.00000000    
   1.00000000    
   0.00000000    
   1.00000000    
   3.00000000    
   1.00000000    
   2.00000000    
   3.00000000    
   0.00000000    
   2.00000000    
   0.00000000    
   1.00000000    
   5.00000000    
   1.00000000    
   0.00000000    
   0.00000000    
   1.00000000    
   0.00000000    
   1.00000000    
   1.00000000    
   1.00000000    
   0.00000000    
   0.00000000    
   3.00000000    
   6.00000000    
   0.00000000    
   3.00000000    
   3.00000000    
   1.00000000    
   1.00000000    
   3.00000000    
   3.00000000    
   4.00000000    
   4.00000000    
   1.00000000    
   2.00000000    
   5.00000000    
   0.00000000    
   1.00000000    
   2.00000000    
   1.00000000    
   1.00000000    
   2.00000000    
   3.00000000    
   1.00000000    
   0.00000000    
   3.00000000    
   1.00000000    
   1.00000000    
   3.00000000    
   2.00000000    
   1.00000000    
   2.00000000    
   2.00000000    
   3.00000000    
   1.00000000    
   3.00000000    
   2.00000000    
   1.00000000    
   0.00000000    
   3.00000000    
   2.00000000    
   3.00000000    
   1.00000000    
   2.00000000    
   4.00000000    
   1.00000000    
   2.00000000    
   1.00000000    
   1.00000000    
   2.00000000    
   2.00000000    
   2.00000000    
   0.00000000    
   3.00000000    
   5.00000000    
   2.00000000    
   1.00000000    
   2.00000000    
   2.00000000    
   2.00000000    
   1.00000000    
   0.00000000    
   5.00000000    
   2.00000000    
   3.00000000    
   4.00000000    
   3.00000000    
   0.00000000    
   2.00000000    
   3.00000000    
   1.00000000    
   4.00000000    
   2.00000000    
   2.00000000    
   4.00000000    
   2.00000000    
   2.00000000    
   2.00000000    
   3.00000000    
   0.00000000    
   4.00000000    
   3.00000000    
   2.00000000    
   2.00000000    
   1.00000000    
   3.00000000    
   2.00000000    
   0.00000000    
   1.00000000    
   4.00000000    
   1.00000000    
   5.00000000    
   2.00000000    
   1.00000000    
   2.00000000    
   3.00000000    
   0.00000000    
   0.00000000    
   0.00000000    
   2.00000000    
   5.00000000    
   2.00000000    
   3.00000000    
   0.00000000    
   1.00000000    
   3.00000000    
   1.00000000    
   2.00000000    
   2.00000000    
   1.00000000    
   0.00000000    
   1.00000000    
   4.00000000    
   2.00000000    
   1.00000000    
   1.00000000    
   2.00000000    
   2.00000000    
   3.00000000    
   1.00000000    
   1.00000000    
   0.00000000    
   1.00000000    
   1.00000000    
   2.00000000    
   1.00000000    
   1.00000000    
   0.00000000    
   1.00000000    
   0.00000000    
   4.00000000    
   1.00000000    
   3.00000000    
   3.00000000    
   1.00000000    
   3.00000000    
   2.00000000    
   1.00000000    
   2.00000000    
   3.00000000    
   4.00000000    
   2.00000000    
   3.00000000    
   3.00000000    
   1.00000000    
   3.00000000    
   3.00000000    
   0.00000000    
   0.00000000    
   2.00000000    
   1.00000000    
   1.00000000    
   2.00000000    
   0.00000000    
   1.00000000    
   5.00000000    
   2.00000000    
   2.00000000    
   4.00000000    
   7.00000000    
   3.00000000    
   2.00000000    
   0.00000000    
   0.00000000    
   1.00000000    
   4.00000000    
   2.00000000    
   1.00000000    
   0.00000000    
   0.00000000    
   3.00000000    
   2.00000000    
   2.00000000    
   8.00000000    
   0.00000000    
   2.00000000    
   0.00000000    
   1.00000000    
   1.00000000    
   0.00000000    
   1.00000000    
   3.00000000    
   0.00000000    
   3.00000000    
   0.00000000    
   5.00000000    
   2.00000000    
   1.00000000    
   2.00000000    
   2.00000000    
   0.00000000    
   1.00000000    
   2.00000000    
   2.00000000    
   1.00000000    
   1.00000000    
   1.00000000    
   3.00000000    
   1.00000000    
   4.00000000    
   3.00000000    
   0.00000000    
   4.00000000    
   1.00000000    
   3.00000000    
   4.00000000    
   3.00000000    
   3.00000000    
   6.00000000    
   1.00000000    
   0.00000000    
   1.00000000    
   0.00000000    
   0.00000000    
   1.00000000    
   5.00000000    
   1.00000000    
   0.00000000    
   2.00000000    
   4.00000000    
   2.00000000    
   3.00000000    
   2.00000000    
   0.00000000    
   2.00000000    
   1.00000000    
   2.00000000    
   2.00000000    
   0.00000000    
   4.00000000    
   3.00000000    
   3.00000000    
   0.00000000    
   6.00000000    
   1.00000000    
   1.00000000    
   0.00000000    
   1.00000000    
   2.00000000    
   2.00000000    
   3.00000000    
   1.00000000    
   0.00000000    
   1.00000000    
   1.00000000    
   3.00000000    
   2.00000000    
   0.00000000    
   1.00000000    
   0.00000000    
   1.00000000    
   0.00000000    
   0.00000000    
   0.00000000    
   1.00000000    
   0.00000000    
   1.00000000    
   0.00000000    
   3.00000000    
   2.00000000    
   2.00000000    
   3.00000000    
   3.00000000    
   2.00000000    
   1.00000000    
   1.00000000    
   3.00000000    
   2.00000000    
   4.00000000    
   2.00000000    
   3.00000000    
   3.00000000    
   2.00000000    
   0.00000000    
   4.00000000    
   1.00000000    
   0.00000000    
   1.00000000    
   2.00000000    
   4.00000000    
   3.00000000    
   1.00000000    
   1.00000000    
   2.00000000    
   2.00000000    
   2.00000000    
   1.00000000    
   1.00000000    
   1.00000000    
   0.00000000    
   2.00000000    
   1.00000000    
   0.00000000    
   1.00000000    
   1.00000000    
   1.00000000    
   3.00000000    
   1.00000000    
   0.00000000    
   1.00000000    
   2.00000000    
   0.00000000    
   0.00000000    
   1.00000000    
   1.00000000    
   2.00000000    
   2.00000000    
   1.00000000    
   2.00000000    
   0.00000000    
   0.00000000    
   1.00000000    
   3.00000000    
   0.00000000    
   4.00000000    
   0.00000000    
   2.00000000    
   2.00000000    
   2.00000000    
   0.00000000    
   3.00000000    
   4.00000000    
   2.00000000    
   2.00000000    
   1.00000000    
   3.00000000    
   1.00000000    
   1.00000000    
   3.00000000    
   5.00000000    
   1.00000000    
   1.00000000    
   1.00000000    
   0.00000000    
   3.00000000    
   3.00000000    
   3.00000000    
   1.00000000    
   1.00000000    
   2.00000000    
   1.00000000    
   2.00000000    
   2.00000000    
   1.00000000    
   1.00000000    
   3.00000000    
   3.00000000    
   1.00000000    
   1.00000000    
   3.00000000    
   3.00000000    
   2.00000000    
   0.00000000    
   5.00000000    
   1.00000000    
   3.00000000    
   3.00000000    
   0.00000000    
   2.00000000    
   2.00000000    
   2.00000000    
   1.00000000    
   1.00000000    
   2.00000000    
   1.00000000    
   2.00000000    
   7.00000000    
   0.00000000    
   1.00000000    
   2.00000000    
   1.00000000    
   1.00000000    
   1.00000000    
   1.00000000    
   0.00000000    
   0.00000000    
   0.00000000    
   1.00000000    
   1.00000000    
   0.00000000    
   0.00000000    
   3.00000000    
   2.00000000    
   0.00000000    
   1.00000000    
   4.00000000    
   3.00000000    
   1.00000000    
   1.00000000    
   3.00000000    
   4.00000000    
   1.00000000    
   1.00000000    
   0.00000000    
   1.00000000    
   1.00000000    
   0.00000000    
   3.00000000    
   1.00000000    
   3.00000000    
   1.00000000    
   2.00000000    
   3.00000000    
   3.00000000    
   1.00000000    
   1.00000000    
   1.00000000    
   4.00000000    
   3.00000000    
   2.00000000    
   4.00000000    
   2.00000000    
   2.00000000    
   5.00000000    
   6.00000000    
   5.00000000    
   3.00000000    
   2.00000000    
   4.00000000    
   0.00000000    
   0.00000000    
   1.00000000    
   4.00000000    
   2.00000000    
   2.00000000    
   0.00000000    
   2.00000000    
   1.00000000    
   0.00000000    
   1.00000000    
   2.00000000    
   1.00000000    
   2.00000000    
   0.00000000    
   3.00000000    
   3.00000000    
   2.00000000    
   1.00000000    
   2.00000000    
   2.00000000    
   2.00000000    
   0.00000000    
   1.00000000    
   2.00000000    
   0.00000000    
   1.00000000    
   1.00000000    
   3.00000000    
   3.00000000    
   2.00000000    
   4.00000000    
   1.00000000    
   0.00000000    
   1.00000000    
   2.00000000    
   1.00000000    
   1.00000000    
   3.00000000    
   1.00000000    
   3.00000000    
   3.00000000    
   0.00000000    
   0.00000000    
   1.00000000    
   2.00000000    
   1.00000000    
   0.00000000    
   1.00000000    
   0.00000000    
   0.00000000    
   1.00000000    
   1.00000000    
   0.00000000    
   1.00000000    
   1.00000000    
   3.00000000    
   2.00000000    
   6.00000000    
   7.00000000    
   5.00000000    
   10.0000000    
   9.00000000    
   2.00000000    
   3.00000000    
   0.00000000    
   0.00000000    
   1.00000000    
   1.00000000    
   8.00000000    
   1.00000000    
   0.00000000    
   2.00000000    
   1.00000000    
   0.00000000    
   0.00000000    
   1.00000000    
   2.00000000    
   1.00000000    
   3.00000000    
   1.00000000    
   1.00000000    
   1.00000000    
   0.00000000    
   0.00000000    
   0.00000000    
   1.00000000    
   1.00000000    
   1.00000000    
   2.00000000    
   0.00000000    
   2.00000000    
   1.00000000    
   3.00000000    
   0.00000000    
   3.00000000    
   1.00000000    
   3.00000000    
   2.00000000    
   1.00000000    
   1.00000000    
   3.00000000    
   3.00000000    
   2.00000000    
   2.00000000    
   0.00000000    
   0.00000000    
   4.00000000    
   0.00000000    
   2.00000000    
   3.00000000    
   0.00000000    
   1.00000000    
   2.00000000    
   2.00000000    
   2.00000000    
   1.00000000    
   4.00000000    
   1.00000000    
   0.00000000    
   2.00000000    
   2.00000000    
   5.00000000    
   17.0000000    
   18.0000000    
   18.0000000    
   12.0000000    
   8.00000000    
   5.00000000    
   1.00000000    
   1.00000000    
   2.00000000    
   0.00000000    
   0.00000000    
   2.00000000    
   0.00000000    
   7.00000000    
   2.00000000    
   0.00000000    
   0.00000000    
   5.00000000    
   2.00000000    
   1.00000000    
   2.00000000    
   2.00000000    
   1.00000000    
   3.00000000    
   0.00000000    
   0.00000000    
   0.00000000    
   0.00000000    
   1.00000000    
   0.00000000    
   2.00000000    
   0.00000000    
   0.00000000    
   0.00000000    
   1.00000000    
   0.00000000    
   0.00000000    
   0.00000000    
   0.00000000    
   3.00000000    
   2.00000000    
   0.00000000    
   2.00000000    
   3.00000000    
   1.00000000    
   2.00000000    
   2.00000000    
   1.00000000    
   1.00000000    
   0.00000000    
   1.00000000    
   0.00000000    
   1.00000000    
   3.00000000    
   1.00000000    
   1.00000000    
   2.00000000    
   3.00000000    
   0.00000000    
   3.00000000    
   3.00000000    
   1.00000000    
   9.00000000    
   10.0000000    
   10.0000000    
   18.0000000    
   21.0000000    
   14.0000000    
   10.0000000    
   4.00000000    
   5.00000000    
   3.00000000    
   1.00000000    
   1.00000000    
   2.00000000    
   2.00000000    
   1.00000000    
   0.00000000    
   1.00000000    
   1.00000000    
   5.00000000    
   2.00000000    
   3.00000000    
   0.00000000    
   1.00000000    
   0.00000000    
   1.00000000    
   3.00000000    
   0.00000000    
   1.00000000    
   2.00000000    
   1.00000000    
   0.00000000    
   0.00000000    
   2.00000000    
   0.00000000    
   1.00000000    
   3.00000000    
   1.00000000    
   0.00000000    
   0.00000000    
   1.00000000    
   2.00000000    
   1.00000000    
   0.00000000    
   1.00000000    
   1.00000000    
   1.00000000    
   1.00000000    
   2.00000000    
   0.00000000    
   1.00000000    
   2.00000000    
   2.00000000    
   0.00000000    
   2.00000000    
   4.00000000    
   1.00000000    
   2.00000000    
   0.00000000    
   2.00000000    
   0.00000000    
   1.00000000    
   2.00000000    
   3.00000000    
   7.00000000    
   10.0000000    
   13.0000000    
   16.0000000    
   19.0000000    
   14.0000000    
   10.0000000    
   12.0000000    
   7.00000000    
   2.00000000    
   1.00000000    
   1.00000000    
   4.00000000    
   0.00000000    
   3.00000000    
   1.00000000    
   1.00000000    
   2.00000000    
   2.00000000    
   2.00000000    
   3.00000000    
   0.00000000    
   1.00000000    
   2.00000000    
   2.00000000    
   0.00000000    
   2.00000000    
   1.00000000    
   0.00000000    
   0.00000000    
   0.00000000    
   1.00000000    
   0.00000000    
   1.00000000    
   1.00000000    
   1.00000000    
   0.00000000    
   2.00000000    
   0.00000000    
   1.00000000    
   3.00000000    
   3.00000000    
   2.00000000    
   0.00000000    
   2.00000000    
   0.00000000    
   2.00000000    
   1.00000000    
   1.00000000    
   1.00000000    
   1.00000000    
   0.00000000    
   4.00000000    
   1.00000000    
   2.00000000    
   1.00000000    
   1.00000000    
   2.00000000    
   0.00000000    
   1.00000000    
   1.00000000    
   1.00000000    
   1.00000000    
   1.00000000    
   3.00000000    
   3.00000000    
   10.0000000    
   12.0000000    
   16.0000000    
   11.0000000    
   11.0000000    
   7.00000000    
   5.00000000    
   3.00000000    
   2.00000000    
   2.00000000    
   2.00000000    
   1.00000000    
   1.00000000    
   2.00000000    
   2.00000000    
   0.00000000    
   1.00000000    
   1.00000000    
   0.00000000    
   1.00000000    
   0.00000000    
   1.00000000    
   1.00000000    
   0.00000000    
   0.00000000    
   1.00000000    
   2.00000000    
   0.00000000    
   3.00000000    
   1.00000000    
   1.00000000    
   3.00000000    
   3.00000000    
   4.00000000    
   1.00000000    
   0.00000000    
   0.00000000    
   0.00000000    
   4.00000000    
   1.00000000    
   1.00000000    
   0.00000000    
   2.00000000    
   0.00000000    
   2.00000000    
   1.00000000    
   0.00000000    
   2.00000000    
   0.00000000    
   1.00000000    
   1.00000000    
   1.00000000    
   1.00000000    
   1.00000000    
   2.00000000    
   1.00000000    
   1.00000000    
   0.00000000    
   1.00000000    
   1.00000000    
   2.00000000    
   0.00000000    
   3.00000000    
   2.00000000    
   4.00000000    
   10.0000000    
   16.0000000    
   13.0000000    
   2.00000000    
   3.00000000    
   3.00000000    
   1.00000000    
   3.00000000    
   2.00000000    
   1.00000000    
   1.00000000    
   0.00000000    
   2.00000000    
   1.00000000    
   3.00000000    
   3.00000000    
   2.00000000    
   1.00000000    
   2.00000000    
   1.00000000    
   2.00000000    
   1.00000000    
   1.00000000    
   0.00000000    
   0.00000000    
   4.00000000    
   3.00000000    
   0.00000000    
   3.00000000    
   1.00000000    
   2.00000000    
   0.00000000    
   3.00000000    
   1.00000000    
   1.00000000    
   4.00000000    
   2.00000000    
   2.00000000    
   3.00000000    
   2.00000000    
   2.00000000    
   1.00000000    
   0.00000000    
   1.00000000    
   0.00000000    
   2.00000000    
   1.00000000    
   4.00000000    
   2.00000000    
   4.00000000    
   3.00000000    
   0.00000000    
   1.00000000    
   2.00000000    
   0.00000000    
   2.00000000    
   1.00000000    
   1.00000000    
   1.00000000    
   1.00000000    
   2.00000000    
   2.00000000    
   4.00000000    
   5.00000000    
   4.00000000    
   7.00000000    
   5.00000000    
   8.00000000    
   7.00000000    
   1.00000000    
   2.00000000    
   0.00000000    
   2.00000000    
   1.00000000    
   0.00000000    
   1.00000000    
   1.00000000    
   1.00000000    
   3.00000000    
   1.00000000    
   2.00000000    
   0.00000000    
   2.00000000    
   1.00000000    
   1.00000000    
   0.00000000    
   1.00000000    
   1.00000000    
   2.00000000    
   2.00000000    
   1.00000000    
   3.00000000    
   1.00000000    
   2.00000000    
   2.00000000    
   5.00000000    
   2.00000000    
   4.00000000    
   2.00000000    
   4.00000000    
   1.00000000    
   1.00000000    
   2.00000000    
   4.00000000    
   0.00000000    
   0.00000000    
   1.00000000    
   1.00000000    
   0.00000000    
   1.00000000    
   3.00000000    
   4.00000000    
   0.00000000    
   0.00000000    
   4.00000000    
   1.00000000    
   1.00000000    
   1.00000000    
   1.00000000    
   1.00000000    
   1.00000000    
   3.00000000    
   0.00000000    
   0.00000000    
   1.00000000    
   4.00000000    
   2.00000000    
   2.00000000    
   2.00000000    
   2.00000000    
   4.00000000    
   1.00000000    
   1.00000000    
   4.00000000    
   2.00000000    
   2.00000000    
   0.00000000    
   2.00000000    
   1.00000000    
   1.00000000    
   2.00000000    
   1.00000000    
   2.00000000    
   1.00000000    
   1.00000000    
   1.00000000    
   0.00000000    
   0.00000000    
   1.00000000    
   1.00000000    
   2.00000000    
   0.00000000    
   3.00000000    
   3.00000000    
   1.00000000    
   2.00000000    
   1.00000000    
   3.00000000    
   0.00000000    
   3.00000000    
   1.00000000    
   1.00000000    
   3.00000000    
   2.00000000    
   0.00000000    
   0.00000000    
   3.00000000    
   0.00000000    
   0.00000000    
   1.00000000    
   0.00000000    
   1.00000000    
   3.00000000    
   0.00000000    
   0.00000000    
   1.00000000    
   4.00000000    
   4.00000000    
   1.00000000    
   2.00000000    
   1.00000000    
   2.00000000    
   1.00000000    
   4.00000000    
   0.00000000    
   1.00000000    
   0.00000000    
   0.00000000    
   1.00000000    
   4.00000000    
   1.00000000    
   4.00000000    
   1.00000000    
   5.00000000    
   4.00000000    
   0.00000000    
   4.00000000    
   2.00000000    
   3.00000000    
   0.00000000    
   3.00000000    
   2.00000000    
   3.00000000    
   3.00000000    
   0.00000000    
   1.00000000    
   1.00000000    
   1.00000000    
   3.00000000    
   3.00000000    
   2.00000000    
   0.00000000    
   0.00000000    
   1.00000000    
   0.00000000    
   2.00000000    
   0.00000000    
   3.00000000    
   1.00000000    
   1.00000000    
   0.00000000    
   5.00000000    
   2.00000000    
   3.00000000    
   2.00000000    
   1.00000000    
   1.00000000    
   2.00000000    
   2.00000000    
   6.00000000    
   0.00000000    
   2.00000000    
   1.00000000    
   0.00000000    
   0.00000000    
   1.00000000    
   2.00000000    
   2.00000000    
   2.00000000    
   2.00000000    
   0.00000000    
   4.00000000    
   2.00000000    
   1.00000000    
   0.00000000    
   0.00000000    
   2.00000000    
   1.00000000    
   1.00000000    
   2.00000000    
   2.00000000    
   1.00000000    
   4.00000000    
   3.00000000    
   7.00000000    
   5.00000000    
   1.00000000    
   3.00000000    
   1.00000000    
   1.00000000    
   2.00000000    
   1.00000000    
   2.00000000    
   1.00000000    
   5.00000000    
   3.00000000    
   0.00000000    
   2.00000000    
   0.00000000    
   0.00000000    
   2.00000000    
   0.00000000    
   0.00000000    
   0.00000000    
   1.00000000    
   1.00000000    
   0.00000000    
   2.00000000    
   3.00000000    
   0.00000000    
   0.00000000    
   3.00000000    
   1.00000000    
   3.00000000    
   3.00000000    
   1.00000000    
   1.00000000    
   2.00000000    
   4.00000000    
   0.00000000    
   1.00000000    
   2.00000000    
   1.00000000    
   2.00000000    
   1.00000000    
   2.00000000    
   0.00000000    
   1.00000000    
   1.00000000    
   0.00000000    
   1.00000000    
   0.00000000    
   0.00000000    
   2.00000000    
   2.00000000    
   1.00000000    
   2.00000000    
   1.00000000    
   2.00000000    
   1.00000000    
   2.00000000    
   1.00000000    
   0.00000000    
   4.00000000    
   0.00000000    
   1.00000000    
   1.00000000    
   3.00000000    
   5.00000000    
   2.00000000    
   2.00000000    
   0.00000000    
   1.00000000    
   4.00000000    
   1.00000000    
   3.00000000    
   2.00000000    
   5.00000000    
   2.00000000    
   1.00000000    
   3.00000000    
   0.00000000    
   1.00000000    
   0.00000000    
   2.00000000    
   0.00000000    
   0.00000000    
   1.00000000    
   0.00000000    
   2.00000000    
   4.00000000    
   2.00000000    
   3.00000000    
   3.00000000    
   3.00000000    
   0.00000000    
   1.00000000    
   2.00000000    
   4.00000000    
   2.00000000    
   3.00000000    
   1.00000000    
   2.00000000    
   0.00000000    
   1.00000000    
   2.00000000    
   5.00000000    
   1.00000000    
   0.00000000    
   1.00000000    
   1.00000000    
   1.00000000    
   0.00000000    
   2.00000000    
   1.00000000    
   3.00000000    
   1.00000000    
   1.00000000    
   1.00000000    
   1.00000000    
   1.00000000    
   0.00000000    
   0.00000000    
   2.00000000    
   3.00000000    
   3.00000000    
   1.00000000    
   1.00000000    
   0.00000000    
   1.00000000    
   2.00000000    
   2.00000000    
   2.00000000    
   2.00000000    
   2.00000000    
   1.00000000    
   1.00000000    
   2.00000000    
   0.00000000    
   2.00000000    
   1.00000000    
   1.00000000    
   1.00000000    
   1.00000000    
   0.00000000    
   1.00000000    
   3.00000000    
   0.00000000    
   2.00000000    
   0.00000000    
   0.00000000    
   2.00000000    
   0.00000000    
   0.00000000    
   3.00000000    
   1.00000000    
   1.00000000    
   1.00000000    
   1.00000000    
   1.00000000    
   0.00000000    
   0.00000000    
   2.00000000    
   3.00000000    
   1.00000000    
   2.00000000    
   3.00000000    
   2.00000000    
   1.00000000    
   0.00000000    
   3.00000000    
   0.00000000    
   0.00000000    
   2.00000000    
   1.00000000    
   0.00000000    
   1.00000000    
   0.00000000    
   0.00000000    
   0.00000000    
   0.00000000    
   1.00000000    
   2.00000000    
   1.00000000    
   1.00000000    
   0.00000000    
   3.00000000    
   2.00000000    
   0.00000000    
   1.00000000    
   1.00000000    
   2.00000000    
   1.00000000    
   2.00000000    
   2.00000000    
   1.00000000    
   3.00000000    
   0.00000000    
   2.00000000    
   1.00000000    
   0.00000000    
   2.00000000    
   1.00000000    
   3.00000000    
   1.00000000    
   0.00000000    
   2.00000000    
   0.00000000    
   5.00000000    
   0.00000000    
   0.00000000    
   1.00000000    
   0.00000000    
   1.00000000    
   0.00000000    
   1.00000000    
   0.00000000    
   3.00000000    
   0.00000000    
   3.00000000    
   2.00000000    
   1.00000000    
   3.00000000    
   2.00000000    
   0.00000000    
   0.00000000    
   0.00000000    
   1.00000000    
   1.00000000    
   2.00000000    
   3.00000000    
   0.00000000    
   0.00000000    
   0.00000000    
   2.00000000    
   2.00000000    
   0.00000000    
   3.00000000    
   2.00000000    
   2.00000000    
   3.00000000    
   0.00000000    
   1.00000000    
   0.00000000    
   3.00000000    
   0.00000000    
   3.00000000    
   1.00000000    
   1.00000000    
   1.00000000    
   1.00000000    
   2.00000000    
   1.00000000    
   1.00000000    
   1.00000000    
   5.00000000    
   2.00000000    
   0.00000000    
   0.00000000    
   1.00000000    
   0.00000000    
   1.00000000    
   0.00000000    
   1.00000000    
   0.00000000    
   0.00000000    
   1.00000000    
   0.00000000    
   0.00000000    
   0.00000000    
   2.00000000    
   1.00000000    
   2.00000000    
   1.00000000    
   4.00000000    
   1.00000000    
   1.00000000    
   1.00000000    
   1.00000000    
   0.00000000    
   1.00000000    
   1.00000000    
   3.00000000    
   1.00000000    
   1.00000000    
   0.00000000    
   3.00000000    
   4.00000000    
   2.00000000    
   0.00000000    
   0.00000000    
   1.00000000    
   3.00000000    
   3.00000000    
   3.00000000    
   0.00000000    
   0.00000000    
   0.00000000    
   1.00000000    
   2.00000000    
   1.00000000    
   2.00000000    
   2.00000000    
   3.00000000    
   3.00000000    
   2.00000000    
   0.00000000    
   0.00000000    
   1.00000000    
   1.00000000    
   0.00000000    
   1.00000000    
   1.00000000    
   0.00000000    
   0.00000000    
   2.00000000    
   1.00000000    
   1.00000000    
   0.00000000    
   0.00000000    
   1.00000000    
   2.00000000    
   0.00000000    
   2.00000000    
   1.00000000    
   4.00000000    
   1.00000000    
   2.00000000    
   1.00000000    
   2.00000000    
   1.00000000    
   1.00000000    
   2.00000000    
   1.00000000    
   2.00000000    
   1.00000000    
   1.00000000    
   0.00000000    
   0.00000000    
   0.00000000    
   2.00000000    
   1.00000000    
   0.00000000    
   0.00000000    
   0.00000000    
   1.00000000    
   1.00000000    
   2.00000000    
   3.00000000    
   5.00000000    
   1.00000000    
   2.00000000    
   3.00000000    
   1.00000000    
   1.00000000    
   2.00000000    
   1.00000000    
   3.00000000    
   3.00000000    
   2.00000000    
   1.00000000    
   2.00000000    
   3.00000000    
   0.00000000    
   1.00000000    
   3.00000000    
   0.00000000    
   3.00000000    
   2.00000000    
   3.00000000    
   2.00000000    
   2.00000000    
   0.00000000    
   1.00000000    
   0.00000000    
   0.00000000    
   0.00000000    
   1.00000000    
   0.00000000    
   2.00000000    
   0.00000000    
   2.00000000    
   0.00000000    
   0.00000000    
   2.00000000    
   0.00000000    
   0.00000000    
   0.00000000    
   1.00000000    
   0.00000000    
   1.00000000    
   1.00000000    
   3.00000000    
   2.00000000    
   2.00000000    
   0.00000000    
   3.00000000    
   0.00000000    
   1.00000000    
   2.00000000    
   2.00000000    
   0.00000000    
   2.00000000    
   0.00000000    
   0.00000000    
   2.00000000    
   2.00000000    
   2.00000000    
   1.00000000    
   3.00000000    
   2.00000000    
   2.00000000    
   0.00000000    
   2.00000000    
   1.00000000    
   3.00000000    
   1.00000000    
   1.00000000    
   3.00000000    
   1.00000000    
   8.00000000    
   0.00000000    
   1.00000000    
   1.00000000    
   0.00000000    
   0.00000000    
   0.00000000    
   3.00000000    
   3.00000000    
   0.00000000    
   3.00000000    
   3.00000000    
   6.00000000    
   0.00000000    
   0.00000000    
   4.00000000    
   0.00000000    
   0.00000000    
   0.00000000    
   1.00000000    
   4.00000000    
   1.00000000    
   0.00000000    
   1.00000000    
   1.00000000    
   2.00000000    
   1.00000000    
   1.00000000    
   0.00000000    
   1.00000000    
   2.00000000    
   1.00000000    
   1.00000000    
   1.00000000    
   2.00000000    
   2.00000000    
   2.00000000    
   0.00000000    
   2.00000000    
   3.00000000    
   0.00000000    
   1.00000000    
   0.00000000    
   1.00000000    
   2.00000000    
   0.00000000    
   2.00000000    
   3.00000000    
   1.00000000    
   0.00000000    
   0.00000000    
   0.00000000    
   1.00000000    
   3.00000000    
   0.00000000    
   5.00000000    
   3.00000000    
   3.00000000    
   2.00000000    
   1.00000000    
   2.00000000    
   2.00000000    
   3.00000000    
   3.00000000    
   0.00000000    
   0.00000000    
   2.00000000    
   1.00000000    
   2.00000000    
   6.00000000    
   4.00000000    
   3.00000000    
   5.00000000    
   2.00000000    
   2.00000000    
   0.00000000    
   0.00000000    
   0.00000000    
   0.00000000    
   2.00000000    
   2.00000000    
   3.00000000    
   3.00000000    
   0.00000000    
   0.00000000    
   1.00000000    
   0.00000000    
   0.00000000    
   0.00000000    
   0.00000000    
   0.00000000    
   0.00000000    
   1.00000000    
   1.00000000    
   1.00000000    
   1.00000000    
   0.00000000    
   2.00000000    
   0.00000000    
   0.00000000    
   1.00000000    
   1.00000000    
   1.00000000    
   0.00000000    
   1.00000000    
   1.00000000    
   5.00000000    
   1.00000000    
   0.00000000    
   1.00000000    
   2.00000000    
   2.00000000    
   1.00000000    
   2.00000000    
   0.00000000    
   1.00000000    
   1.00000000    
   4.00000000    
   3.00000000    
   2.00000000    
   1.00000000    
   2.00000000    
   4.00000000    
   2.00000000    
   3.00000000    
   3.00000000    
   3.00000000    
   3.00000000    
   1.00000000    
   2.00000000    
   2.00000000    
   3.00000000    
   1.00000000    
   4.00000000    
   1.00000000    
   3.00000000    
   1.00000000    
   2.00000000    
   0.00000000    
   1.00000000    
   0.00000000    
   1.00000000    
   2.00000000    
   1.00000000    
   1.00000000    
   3.00000000    
   0.00000000    
   0.00000000    
   1.00000000    
   1.00000000    
   0.00000000    
   0.00000000    
   1.00000000    
   0.00000000    
   1.00000000    
   0.00000000    
   0.00000000    
   1.00000000    
   0.00000000    
   0.00000000    
   1.00000000    
   0.00000000    
   1.00000000    
   1.00000000    
   1.00000000    
   0.00000000    
   0.00000000    
   1.00000000    
   0.00000000    
   1.00000000    
   2.00000000    
   0.00000000    
   1.00000000    
   0.00000000    
   0.00000000    
   0.00000000    
   3.00000000    
   1.00000000    
   0.00000000    
   3.00000000    
   0.00000000    
   1.00000000    
   1.00000000    
   4.00000000    
   1.00000000    
   1.00000000    
   0.00000000    
   0.00000000    
   2.00000000    
   0.00000000    
   0.00000000    
   2.00000000    
   1.00000000    
   1.00000000    
   3.00000000    
   6.00000000    
   2.00000000    
   3.00000000    
   2.00000000    
   3.00000000    
   2.00000000    
   3.00000000    
   2.00000000    
   1.00000000    
   4.00000000    
   4.00000000    
   2.00000000    
   2.00000000    
   2.00000000    
   3.00000000    
   4.00000000    
   1.00000000    
   5.00000000    
   1.00000000    
   4.00000000    
   1.00000000    
   1.00000000    
   1.00000000    
   1.00000000    
   4.00000000    
   3.00000000    
   0.00000000    
   1.00000000    
   1.00000000    
   0.00000000    
   2.00000000    
   1.00000000    
   1.00000000    
   0.00000000    
   2.00000000    
   0.00000000    
   4.00000000    
   3.00000000    
   2.00000000    
   4.00000000    
   2.00000000    
   1.00000000    
   2.00000000    
   2.00000000    
   1.00000000    
   2.00000000    
   3.00000000    
   4.00000000    
   1.00000000    
   1.00000000    
   3.00000000    
   1.00000000    
   1.00000000    
   0.00000000    
   0.00000000    
   1.00000000    
   1.00000000    
   2.00000000    
   1.00000000    
   1.00000000    
   0.00000000    
   0.00000000    
   2.00000000    
   2.00000000    
   2.00000000    
   3.00000000    
   8.00000000    
   8.00000000    
   3.00000000    
   4.00000000    
   7.00000000    
   3.00000000    
   4.00000000    
   1.00000000    
   2.00000000    
   2.00000000    
   1.00000000    
   2.00000000    
   3.00000000    
   2.00000000    
   0.00000000    
   2.00000000    
   1.00000000    
   1.00000000    
   6.00000000    
   2.00000000    
   1.00000000    
   0.00000000    
   2.00000000    
   1.00000000    
   0.00000000    
   0.00000000    
   2.00000000    
   2.00000000    
   1.00000000    
   1.00000000    
   1.00000000    
   2.00000000    
   3.00000000    
   1.00000000    
   3.00000000    
   1.00000000    
   3.00000000    
   3.00000000    
   3.00000000    
   4.00000000    
   1.00000000    
   3.00000000    
   2.00000000    
   3.00000000    
   4.00000000    
   3.00000000    
   0.00000000    
   0.00000000    
   1.00000000    
   0.00000000    
   2.00000000    
   1.00000000    
   0.00000000    
   2.00000000    
   1.00000000    
   5.00000000    
   3.00000000    
   2.00000000    
   1.00000000    
   3.00000000    
   0.00000000    
   4.00000000    
   1.00000000    
   2.00000000    
   8.00000000    
   12.0000000    
   2.00000000    
   2.00000000    
   2.00000000    
   8.00000000    
   2.00000000    
   6.00000000    
   10.0000000    
   2.00000000    
   2.00000000    
   2.00000000    
   4.00000000    
   2.00000000    
   8.00000000    
   4.00000000    
   4.00000000    
   2.00000000    
   4.00000000    
   6.00000000    
   2.00000000    
   0.00000000    
   4.00000000    
   0.00000000    
   4.00000000    
   4.00000000    
   2.00000000    
   0.00000000    
   0.00000000    
   0.00000000    
   0.00000000    
   6.00000000    
   4.00000000    
   10.0000000    
   2.00000000    
   0.00000000    
   0.00000000    
   0.00000000    
   2.00000000    
   4.00000000    
   2.00000000    
   0.00000000    
   0.00000000    
   0.00000000    
   0.00000000    
   2.00000000    
   0.00000000    
   0.00000000    
   2.00000000    
   4.00000000    
   0.00000000    
   2.00000000    
   0.00000000    
   4.00000000    
   2.00000000    
   2.00000000    
   0.00000000    
   2.00000000    
   0.00000000    
   0.00000000    
   4.00000000    
   0.00000000    
   2.00000000    
   3.00000000    
   3.00000000    
   2.00000000    
   2.00000000    
   3.00000000    
   5.00000000    
   4.00000000    
   2.00000000    
   7.00000000    
   7.00000000    
   3.00000000    
   6.00000000    
   4.00000000    
   3.00000000    
   3.00000000    
   4.00000000    
   2.00000000    
   2.00000000    
   0.00000000    
   4.00000000    
   2.00000000    
   1.00000000    
   2.00000000    
   4.00000000    
   3.00000000    
   5.00000000    
   2.00000000    
   2.00000000    
   4.00000000    
   6.00000000    
   2.00000000    
   1.00000000    
   5.00000000    
   2.00000000    
   4.00000000    
   2.00000000    
   2.00000000    
   3.00000000    
   3.00000000    
   1.00000000    
   3.00000000    
   1.00000000    
   4.00000000    
   3.00000000    
   2.00000000    
   2.00000000    
   0.00000000    
   3.00000000    
   1.00000000    
   2.00000000    
   2.00000000    
   1.00000000    
   1.00000000    
   2.00000000    
   3.00000000    
   1.00000000    
   1.00000000    
   2.00000000    
   0.00000000    
   2.00000000    
   3.00000000    
   1.00000000    
   0.00000000    
   2.00000000    
   2.00000000    
   4.00000000    
   2.00000000    
   3.00000000    
   2.00000000    
   4.00000000    
   3.00000000    
   4.00000000    
   2.00000000    
   4.00000000    
   2.00000000    
   4.00000000    
   6.00000000    
   4.00000000    
   3.00000000    
   3.00000000    
   2.00000000    
   3.00000000    
   4.00000000    
   1.00000000    
   2.00000000    
   2.00000000    
   0.00000000    
   5.00000000    
   3.00000000    
   4.00000000    
   1.00000000    
   2.00000000    
   3.00000000    
   4.00000000    
   1.00000000    
   1.00000000    
   3.00000000    
   5.00000000    
   4.00000000    
   3.00000000    
   2.00000000    
   1.00000000    
   6.00000000    
   2.00000000    
   2.00000000    
   3.00000000    
   1.00000000    
   2.00000000    
   4.00000000    
   2.00000000    
   1.00000000    
   1.00000000    
   0.00000000    
   3.00000000    
   1.00000000    
   3.00000000    
   2.00000000    
   1.00000000    
   0.00000000    
   3.00000000    
   1.00000000    
   2.00000000    
   1.00000000    
   3.00000000    
   2.00000000    
   1.00000000    
   1.00000000    
   2.00000000    
   3.00000000    
   7.00000000    
   2.00000000    
   5.00000000    
   4.00000000    
   4.00000000    
   2.00000000    
   0.00000000    
   4.00000000    
   5.00000000    
   2.00000000    
   1.00000000    
   3.00000000    
   2.00000000    
   3.00000000    
   3.00000000    
   6.00000000    
   3.00000000    
   3.00000000    
   6.00000000    
   1.00000000    
   1.00000000    
   2.00000000    
   4.00000000    
   2.00000000    
   2.00000000    
   2.00000000    
   3.00000000    
   1.00000000    
   4.00000000    
   4.00000000    
   3.00000000    
   2.00000000    
   0.00000000    
   1.00000000    
   1.00000000    
   3.00000000    
   4.00000000    
   0.00000000    
   2.00000000    
   2.00000000    
   3.00000000    
   3.00000000    
   1.00000000    
   4.00000000    
   2.00000000    
   4.00000000    
   1.00000000    
   2.00000000    
   4.00000000    
   0.00000000    
   0.00000000    
   2.00000000    
   2.00000000    
   2.00000000    
   1.00000000    
   1.00000000    
   2.00000000    
   3.00000000    
   2.00000000    
   2.00000000    
   2.00000000    
   1.00000000    
   2.00000000    
   2.00000000    
   3.00000000    
   8.00000000    
   4.00000000    
   3.00000000    
   2.00000000    
   4.00000000    
   3.00000000    
   2.00000000    
   1.00000000    
   4.00000000    
   2.00000000    
   2.00000000    
   1.00000000    
   7.00000000    
   3.00000000    
   4.00000000    
   3.00000000    
   3.00000000    
   4.00000000    
   6.00000000    
   4.00000000    
   2.00000000    
   1.00000000    
   2.00000000    
   1.00000000    
   2.00000000    
   2.00000000    
   5.00000000    
   1.00000000    
   3.00000000    
   3.00000000    
   2.00000000    
   0.00000000    
   3.00000000    
   3.00000000    
   1.00000000    
   3.00000000    
   1.00000000    
   4.00000000    
   3.00000000    
   2.00000000    
   4.00000000    
   4.00000000    
   2.00000000    
   1.00000000    
   1.00000000    
   0.00000000    
   2.00000000    
   3.00000000    
   1.00000000    
   1.00000000    
   1.00000000    
   1.00000000    
   4.00000000    
   2.00000000    
   2.00000000    
   2.00000000    
   1.00000000    
   0.00000000    
   0.00000000    
   6.00000000    
   3.00000000    
   1.00000000    
   1.00000000    
   4.00000000    
   2.00000000    
   2.00000000    
   4.00000000    
   0.00000000    
   3.00000000    
   0.00000000    
   2.00000000    
   3.00000000    
   3.00000000    
   1.00000000    
   3.00000000    
   5.00000000    
   3.00000000    
   1.00000000    
   1.00000000    
   8.00000000    
   1.00000000    
   1.00000000    
   5.00000000    
   3.00000000    
   1.00000000    
   7.00000000    
   2.00000000    
   2.00000000    
   3.00000000    
   0.00000000    
   7.00000000    
   5.00000000    
   4.00000000    
   4.00000000    
   4.00000000    
   3.00000000    
   3.00000000    
   2.00000000    
   4.00000000    
   2.00000000    
   2.00000000    
   9.00000000    
   3.00000000    
   2.00000000    
   3.00000000    
   1.00000000    
   1.00000000    
   2.00000000    
   0.00000000    
   1.00000000    
   1.00000000    
   1.00000000    
   0.00000000    
   0.00000000    
   2.00000000    
   1.00000000    
   2.00000000    
   2.00000000    
   1.00000000    
   3.00000000    
   4.00000000    
   3.00000000    
   3.00000000    
   1.00000000    
   2.00000000    
   1.00000000    
   4.00000000    
   1.00000000    
   6.00000000    
   7.00000000    
   2.00000000    
   4.00000000    
   2.00000000    
   2.00000000    
   10.0000000    
   5.00000000    
   9.00000000    
   1.00000000    
   1.00000000    
   3.00000000    
   1.00000000    
   4.00000000    
   0.00000000    
   6.00000000    
   6.00000000    
   3.00000000    
   4.00000000    
   2.00000000    
   3.00000000    
   1.00000000    
   2.00000000    
   3.00000000    
   6.00000000    
   2.00000000    
   1.00000000    
   3.00000000    
   2.00000000    
   5.00000000    
   3.00000000    
   1.00000000    
   0.00000000    
   4.00000000    
   4.00000000    
   1.00000000    
   4.00000000    
   0.00000000    
   1.00000000    
   2.00000000    
   0.00000000    
   0.00000000    
   5.00000000    
   1.00000000    
   1.00000000    
   0.00000000    
   0.00000000    
   3.00000000    
   0.00000000    
   1.00000000    
   2.00000000    
   2.00000000    
   3.00000000    
   1.00000000    
   3.00000000    
   2.00000000    
   3.00000000    
   1.00000000    
   2.00000000    
   0.00000000    
   1.00000000    
   2.00000000    
   4.00000000    
   2.00000000    
   10.0000000    
   7.00000000    
   4.00000000    
   5.00000000    
   1.00000000    
   3.00000000    
   5.00000000    
   6.00000000    
   7.00000000    
   3.00000000    
   3.00000000    
   5.00000000    
   2.00000000    
   3.00000000    
   3.00000000    
   4.00000000    
   0.00000000    
   4.00000000    
   3.00000000    
   4.00000000    
   3.00000000    
   2.00000000    
   2.00000000    
   3.00000000    
   1.00000000    
   4.00000000    
   3.00000000    
   2.00000000    
   1.00000000    
   1.00000000    
   3.00000000    
   4.00000000    
   1.00000000    
   0.00000000    
   1.00000000    
   4.00000000    
   1.00000000    
   2.00000000    
   3.00000000    
   4.00000000    
   3.00000000    
   1.00000000    
   0.00000000    
   2.00000000    
   3.00000000    
   0.00000000    
   0.00000000    
   2.00000000    
   0.00000000    
   2.00000000    
   0.00000000    
   2.00000000    
   2.00000000    
   1.00000000    
   2.00000000    
   2.00000000    
   0.00000000    
   1.00000000    
   0.00000000    
   2.00000000    
   2.00000000    
   1.00000000    
   2.00000000    
   2.00000000    
   2.00000000    
   3.00000000    
   2.00000000    
   2.00000000    
   4.00000000    
   3.00000000    
   9.00000000    
   7.00000000    
   0.00000000    
   5.00000000    
   5.00000000    
   4.00000000    
   0.00000000    
   2.00000000    
   3.00000000    
   1.00000000    
   2.00000000    
   4.00000000    
   2.00000000    
   6.00000000    
   1.00000000    
   1.00000000    
   3.00000000    
   0.00000000    
   2.00000000    
   2.00000000    
   2.00000000    
   1.00000000    
   1.00000000    
   3.00000000    
   3.00000000    
   3.00000000    
   1.00000000    
   2.00000000    
   1.00000000    
   2.00000000    
   5.00000000    
   4.00000000    
   4.00000000    
   1.00000000    
   3.00000000    
   3.00000000    
   4.00000000    
   1.00000000    
   1.00000000    
   0.00000000    
   0.00000000    
   2.00000000    
   1.00000000    
   5.00000000    
   2.00000000    
   0.00000000    
   1.00000000    
   0.00000000    
   2.00000000    
   2.00000000    
   4.00000000    
   0.00000000    
   1.00000000    
   1.00000000    
   1.00000000    
   1.00000000    
   2.00000000    
   1.00000000    
   2.00000000    
   6.00000000    
   4.00000000    
   1.00000000    
   2.00000000    
   1.00000000    
   1.00000000    
   3.00000000    
   5.00000000    
   2.00000000    
   3.00000000    
   3.00000000    
   1.00000000    
   1.00000000    
   4.00000000    
   3.00000000    
   5.00000000    
   5.00000000    
   2.00000000    
   3.00000000    
   4.00000000    
   2.00000000    
   6.00000000    
   2.00000000    
   2.00000000    
   2.00000000    
   5.00000000    
   2.00000000    
   1.00000000    
   2.00000000    
   4.00000000    
   3.00000000    
   5.00000000    
   6.00000000    
   2.00000000    
   1.00000000    
   1.00000000    
   1.00000000    
   0.00000000    
   3.00000000    
   3.00000000    
   1.00000000    
   0.00000000    
   0.00000000    
   1.00000000    
   1.00000000    
   1.00000000    
   3.00000000    
   1.00000000    
   0.00000000    
   1.00000000    
   0.00000000    
   1.00000000    
   1.00000000    
   2.00000000    
   2.00000000    
   3.00000000    
   2.00000000    
   2.00000000    
   3.00000000    
   5.00000000    
   2.00000000    
   2.00000000    
   2.00000000    
   2.00000000    
   4.00000000    
   6.00000000    
   3.00000000    
   2.00000000    
   3.00000000    
   1.00000000    
   3.00000000    
   5.00000000    
   3.00000000    
   2.00000000    
   2.00000000    
   1.00000000    
   5.00000000    
   3.00000000    
   6.00000000    
   1.00000000    
   1.00000000    
   4.00000000    
   3.00000000    
   3.00000000    
   3.00000000    
   5.00000000    
   3.00000000    
   2.00000000    
   3.00000000    
   1.00000000    
   0.00000000    
   3.00000000    
   5.00000000    
   4.00000000    
   2.00000000    
   2.00000000    
   4.00000000    
   3.00000000    
   2.00000000    
   3.00000000    
   1.00000000    
   1.00000000    
   4.00000000    
   4.00000000    
   1.00000000    
   2.00000000    
   4.00000000    
   3.00000000    
   2.00000000    
   4.00000000    
   3.00000000    
   0.00000000    
   1.00000000    
   4.00000000    
   1.00000000    
   3.00000000    
   2.00000000    
   1.00000000    
   1.00000000    
   1.00000000    
   2.00000000    
   0.00000000    
   0.00000000    
   1.00000000    
   5.00000000    
   3.00000000    
   3.00000000    
   4.00000000    
   3.00000000    
   4.00000000    
   2.00000000    
   1.00000000    
   5.00000000    
   3.00000000    
   5.00000000    
   4.00000000    
   3.00000000    
   2.00000000    
   4.00000000    
   0.00000000    
   7.00000000    
   4.00000000    
   1.00000000    
   2.00000000    
   3.00000000    
   2.00000000    
   1.00000000    
   5.00000000    
   1.00000000    
   6.00000000    
   4.00000000    
   0.00000000    
   1.00000000    
   5.00000000    
   1.00000000    
   9.00000000    
   10.0000000    
   5.00000000    
   3.00000000    
   7.00000000    
   4.00000000    
   3.00000000    
   2.00000000    
   2.00000000    
   2.00000000    
   5.00000000    
   3.00000000    
   0.00000000    
   2.00000000    
   1.00000000    
   3.00000000    
   2.00000000    
   1.00000000    
   2.00000000    
   2.00000000    
   0.00000000    
   0.00000000    
   3.00000000    
   1.00000000    
   0.00000000    
   2.00000000    
   1.00000000    
   4.00000000    
   2.00000000    
   1.00000000    
   1.00000000    
   2.00000000    
   1.00000000    
   1.00000000    
   4.00000000    
   2.00000000    
   2.00000000    
   3.00000000    
   3.00000000    
   3.00000000    
   7.00000000    
   3.00000000    
   1.00000000    
   2.00000000    
   0.00000000    
   1.00000000    
   1.00000000    
   0.00000000    
   4.00000000    
   2.00000000    
   2.00000000    
   1.00000000    
   1.00000000    
   1.00000000    
   3.00000000    
   2.00000000    
   2.00000000    
   1.00000000    
   4.00000000    
   6.00000000    
   3.00000000    
   2.00000000    
   4.00000000    
   11.0000000    
   9.00000000    
   9.00000000    
   8.00000000    
   8.00000000    
   4.00000000    
   0.00000000    
   2.00000000    
   1.00000000    
   2.00000000    
   1.00000000    
   3.00000000    
   3.00000000    
   0.00000000    
   4.00000000    
   0.00000000    
   1.00000000    
   2.00000000    
   2.00000000    
   2.00000000    
   3.00000000    
   2.00000000    
   2.00000000    
   1.00000000    
   3.00000000    
   0.00000000    
   2.00000000    
   3.00000000    
   2.00000000    
   1.00000000    
   2.00000000    
   2.00000000    
   1.00000000    
   0.00000000    
   3.00000000    
   1.00000000    
   0.00000000    
   8.00000000    
   4.00000000    
   3.00000000    
   3.00000000    
   3.00000000    
   1.00000000    
   4.00000000    
   3.00000000    
   2.00000000    
   1.00000000    
   5.00000000    
   7.00000000    
   2.00000000    
   0.00000000    
   3.00000000    
   3.00000000    
   2.00000000    
   3.00000000    
   0.00000000    
   4.00000000    
   1.00000000    
   3.00000000    
   2.00000000    
   3.00000000    
   2.00000000    
   2.00000000    
   3.00000000    
   5.00000000    
   8.00000000    
   11.0000000    
   7.00000000    
   7.00000000    
   7.00000000    
   4.00000000    
   2.00000000    
   1.00000000    
   2.00000000    
   3.00000000    
   2.00000000    
   3.00000000    
   4.00000000    
   1.00000000    
   3.00000000    
   2.00000000    
   4.00000000    
   1.00000000    
   3.00000000    
   2.00000000    
   1.00000000    
   2.00000000    
   3.00000000    
   0.00000000    
   2.00000000    
   1.00000000    
   2.00000000    
   0.00000000    
   2.00000000    
   0.00000000    
   0.00000000    
   0.00000000    
   2.00000000    
   0.00000000    
   5.00000000    
   2.00000000    
   4.00000000    
   2.00000000    
   2.00000000    
   6.00000000    
   4.00000000    
   1.00000000    
   0.00000000    
   3.00000000    
   3.00000000    
   4.00000000    
   3.00000000    
   4.00000000    
   2.00000000    
   3.00000000    
   2.00000000    
   1.00000000    
   0.00000000    
   3.00000000    
   3.00000000    
   2.00000000    
   2.00000000    
   2.00000000    
   3.00000000    
   0.00000000    
   1.00000000    
   1.00000000    
   5.00000000    
   2.00000000    
   9.00000000    
   7.00000000    
   7.00000000    
   12.0000000    
   6.00000000    
   2.00000000    
   0.00000000    
   2.00000000    
   5.00000000    
   0.00000000    
   2.00000000    
   2.00000000    
   2.00000000    
   2.00000000    
   2.00000000    
   0.00000000    
   2.00000000    
   1.00000000    
   5.00000000    
   2.00000000    
   2.00000000    
   3.00000000    
   1.00000000    
   1.00000000    
   3.00000000    
   0.00000000    
   1.00000000    
   1.00000000    
   3.00000000    
   1.00000000    
   2.00000000    
   1.00000000    
   1.00000000    
   1.00000000    
   1.00000000    
   1.00000000    
   4.00000000    
   2.00000000    
   3.00000000    
   3.00000000    
   3.00000000    
   8.00000000    
   6.00000000    
   4.00000000    
   1.00000000    
   3.00000000    
   6.00000000    
   1.00000000    
   1.00000000    
   3.00000000    
   1.00000000    
   6.00000000    
   6.00000000    
   3.00000000    
   3.00000000    
   2.00000000    
   3.00000000    
   2.00000000    
   3.00000000    
   2.00000000    
   2.00000000    
   4.00000000    
   2.00000000    
   6.00000000    
   7.00000000    
   4.00000000    
   4.00000000    
   6.00000000    
   4.00000000    
   4.00000000    
   0.00000000    
   2.00000000    
   1.00000000    
   2.00000000    
   3.00000000    
   1.00000000    
   1.00000000    
   4.00000000    
   3.00000000    
   0.00000000    
   0.00000000    
   1.00000000    
   6.00000000    
   1.00000000    
   1.00000000    
   2.00000000    
   2.00000000    
   3.00000000    
   2.00000000    
   3.00000000    
   1.00000000    
   4.00000000    
   1.00000000    
   2.00000000    
   1.00000000    
   2.00000000    
   1.00000000    
   2.00000000    
   4.00000000    
   1.00000000    
   2.00000000    
   0.00000000    
   4.00000000    
   3.00000000    
   3.00000000    
   1.00000000    
   6.00000000    
   0.00000000    
   2.00000000    
   5.00000000    
   1.00000000    
   2.00000000    
   1.00000000    
   2.00000000    
   0.00000000    
   6.00000000    
   6.00000000    
   3.00000000    
   3.00000000    
   7.00000000    
   4.00000000    
   0.00000000    
   5.00000000    
   2.00000000    
   1.00000000    
   3.00000000    
   2.00000000    
   3.00000000    
   5.00000000    
   9.00000000    
   4.00000000    
   6.00000000    
   0.00000000    
   4.00000000    
   1.00000000    
   0.00000000    
   4.00000000    
   2.00000000    
   4.00000000    
   1.00000000    
   4.00000000    
   1.00000000    
   1.00000000    
   0.00000000    
   2.00000000    
   1.00000000    
   0.00000000    
   2.00000000    
   2.00000000    
   3.00000000    
   0.00000000    
   2.00000000    
   2.00000000    
   1.00000000    
   0.00000000    
   1.00000000    
   3.00000000    
   1.00000000    
   0.00000000    
   2.00000000    
   0.00000000    
   1.00000000    
   1.00000000    
   6.00000000    
   4.00000000    
   4.00000000    
   1.00000000    
   6.00000000    
   4.00000000    
   1.00000000    
   3.00000000    
   4.00000000    
   4.00000000    
   5.00000000    
   1.00000000    
   3.00000000    
   1.00000000    
   3.00000000    
   3.00000000    
   3.00000000    
   3.00000000    
   4.00000000    
   7.00000000    
   3.00000000    
   5.00000000    
   1.00000000    
   0.00000000    
   4.00000000    
   3.00000000    
   1.00000000    
   1.00000000    
   4.00000000    
   5.00000000    
   4.00000000    
   6.00000000    
   4.00000000    
   3.00000000    
   2.00000000    
   2.00000000    
   4.00000000    
   1.00000000    
   4.00000000    
   2.00000000    
   3.00000000    
   1.00000000    
   4.00000000    
   0.00000000    
   1.00000000    
   3.00000000    
   4.00000000    
   2.00000000    
   2.00000000    
   5.00000000    
   1.00000000    
   1.00000000    
   2.00000000    
   3.00000000    
   1.00000000    
   2.00000000    
   1.00000000    
   1.00000000    
   2.00000000    
   1.00000000    
   2.00000000    
   0.00000000    
   0.00000000    
   1.00000000    
   2.00000000    
   6.00000000    
   2.00000000    
   2.00000000    
   1.00000000    
   6.00000000    
   5.00000000    
   4.00000000    
   3.00000000    
   2.00000000    
   2.00000000    
   4.00000000    
   2.00000000    
   3.00000000    
   0.00000000    
   3.00000000    
   3.00000000    
   3.00000000    
   7.00000000    
   4.00000000    
   2.00000000    
   6.00000000    
   3.00000000    
   2.00000000    
   4.00000000    
   2.00000000    
   3.00000000    
   4.00000000    
   4.00000000    
   5.00000000    
   5.00000000    
   1.00000000    
   1.00000000    
   3.00000000    
   1.00000000    
   1.00000000    
   2.00000000    
   0.00000000    
   1.00000000    
   2.00000000    
   2.00000000    
   2.00000000    
   1.00000000    
   2.00000000    
   1.00000000    
   2.00000000    
   1.00000000    
   1.00000000    
   1.00000000    
   2.00000000    
   2.00000000    
   1.00000000    
   1.00000000    
   3.00000000    
   2.00000000    
   2.00000000    
   2.00000000    
   1.00000000    
   0.00000000    
   0.00000000    
   1.00000000    
   0.00000000    
   1.00000000    
   1.00000000    
   1.00000000    
   2.00000000    
   1.00000000    
   2.00000000    
   1.00000000    
   4.00000000    
   3.00000000    
   2.00000000    
   4.00000000    
   6.00000000    
   3.00000000    
   3.00000000    
   1.00000000    
   2.00000000    
   4.00000000    
   2.00000000    
   2.00000000    
   7.00000000    
   3.00000000    
   2.00000000    
   2.00000000    
   3.00000000    
   4.00000000    
   4.00000000    
   2.00000000    
   4.00000000    
   5.00000000    
   2.00000000    
   6.00000000    
   8.00000000    
   3.00000000    
   2.00000000    
   0.00000000    
   4.00000000    
   0.00000000    
   3.00000000    
   3.00000000    
   1.00000000    
   5.00000000    
   3.00000000    
   2.00000000    
   0.00000000    
   2.00000000    
   1.00000000    
   1.00000000    
   1.00000000    
   1.00000000    
   0.00000000    
   4.00000000    
   4.00000000    
   0.00000000    
   2.00000000    
   3.00000000    
   0.00000000    
   3.00000000    
   4.00000000    
   2.00000000    
   1.00000000    
   2.00000000    
   1.00000000    
   1.00000000    
   1.00000000    
   0.00000000    
   1.00000000    
   0.00000000    
   0.00000000    
   2.00000000    
   0.00000000    
   2.00000000    
   2.00000000    
   1.00000000    
   3.00000000    
   3.00000000    
   1.00000000    
   4.00000000    
   3.00000000    
   5.00000000    
   2.00000000    
   1.00000000    
   2.00000000    
   3.00000000    
   4.00000000    
   5.00000000    
   6.00000000    
   3.00000000    
   2.00000000    
   2.00000000    
   3.00000000    
   5.00000000    
   3.00000000    
   5.00000000    
   6.00000000    
   3.00000000    
   4.00000000    
   6.00000000    
   2.00000000    
   8.00000000    
   3.00000000    
   5.00000000    
   1.00000000    
   2.00000000    
   4.00000000    
   1.00000000    
   3.00000000    
   1.00000000    
   4.00000000    
   1.00000000    
   2.00000000    
   3.00000000    
   2.00000000    
   3.00000000    
   2.00000000    
   3.00000000    
   1.00000000    
   2.00000000    
   1.00000000    
   5.00000000    
   3.00000000    
   4.00000000    
   3.00000000    
   3.00000000    
   2.00000000    
   3.00000000    
   2.00000000    
   1.00000000    
   0.00000000    
   1.00000000    
   4.00000000    
   2.00000000    
   4.00000000    
   4.00000000    
   5.00000000    
   4.00000000    
   1.00000000    
   7.00000000    
   1.00000000    
   2.00000000    
   1.00000000    
   2.00000000    
   3.00000000    
   1.00000000    
   1.00000000    
   3.00000000    
   2.00000000    
   2.00000000    
   0.00000000    
   1.00000000    
   3.00000000    
   4.00000000    
   2.00000000    
   6.00000000    
   5.00000000    
   4.00000000    
   4.00000000    
   6.00000000    
   3.00000000    
   6.00000000    
   3.00000000    
   4.00000000    
   2.00000000    
   2.00000000    
   5.00000000    
   2.00000000    
   2.00000000    
   1.00000000    
   3.00000000    
   2.00000000    
   3.00000000    
   1.00000000    
   5.00000000    
   2.00000000    
   2.00000000    
   1.00000000    
   0.00000000    
   3.00000000    
   1.00000000    
   4.00000000    
   0.00000000    
   2.00000000    
   4.00000000    
   1.00000000    
   1.00000000    
   2.00000000    
   2.00000000    
   2.00000000    
   1.00000000    
   1.00000000    
   1.00000000    
   0.00000000    
   0.00000000    
   0.00000000    
   3.00000000    
   1.00000000    
   0.00000000    
   3.00000000    
   3.00000000    
   2.00000000    
   2.00000000    
   2.00000000    
   2.00000000    
   2.00000000    
   3.00000000    
   6.00000000    
   5.00000000    
   6.00000000    
   4.00000000    
   2.00000000    
   3.00000000    
   3.00000000    
   5.00000000    
   0.00000000    
   2.00000000    
   4.00000000    
   3.00000000    
   5.00000000    
   4.00000000    
   4.00000000    
   3.00000000    
   5.00000000    
   5.00000000    
   1.00000000    
   4.00000000    
   4.00000000    
   4.00000000    
   5.00000000    
   0.00000000    
   4.00000000    
   0.00000000    
   1.00000000    
   2.00000000    
   1.00000000    
   5.00000000    
   4.00000000    
   2.00000000    
   2.00000000    
   2.00000000    
   0.00000000    
   0.00000000    
   5.00000000    
   3.00000000    
   0.00000000    
   2.00000000    
   1.00000000    
   3.00000000    
   1.00000000    
   2.00000000    
   6.00000000    
   0.00000000    
   2.00000000    
   0.00000000    
   1.00000000    
   0.00000000    
   2.00000000    
   0.00000000    
   3.00000000    
   0.00000000    
   0.00000000    
   4.00000000    
   5.00000000    
   4.00000000    
   2.00000000    
   1.00000000    
   2.00000000    
   3.00000000    
   3.00000000    
   0.00000000    
   2.00000000    
   3.00000000    
   4.00000000    
   6.00000000    
   3.00000000    
   0.00000000    
   2.00000000    
   2.00000000    
   4.00000000    
   4.00000000    
   2.00000000    
   5.00000000    
   4.00000000    
   4.00000000    
   2.00000000    
   3.00000000    
   0.00000000    
   2.00000000    
   4.00000000    
   1.00000000    
   2.00000000    
   3.00000000    
   3.00000000    
   4.00000000    
   6.00000000    
   3.00000000    
   1.00000000    
   4.00000000    
   2.00000000    
   1.00000000    
   4.00000000    
   3.00000000    
   1.00000000    
   5.00000000    
   1.00000000    
   2.00000000    
   2.00000000    
   0.00000000    
   1.00000000    
   2.00000000    
   2.00000000    
   3.00000000    
   3.00000000    
   0.00000000    
   2.00000000    
   0.00000000    
   4.00000000    
   0.00000000    
   0.00000000    
   0.00000000    
   0.00000000    
   2.00000000    
   2.00000000    
   1.00000000    
   0.00000000    
   4.00000000    
   2.00000000    
   1.00000000    
   2.00000000    
   2.00000000    
   3.00000000    
   6.00000000    
   1.00000000    
   2.00000000    
   2.00000000    
   2.00000000    
   0.00000000    
   3.00000000    
   2.00000000    
   1.00000000    
   2.00000000    
   1.00000000    
   3.00000000    
   2.00000000    
   4.00000000    
   3.00000000    
   4.00000000    
   3.00000000    
   3.00000000    
   6.00000000    
   0.00000000    
   2.00000000    
   5.00000000    
   4.00000000    
   4.00000000    
   4.00000000    
   1.00000000    
   2.00000000    
   2.00000000    
   3.00000000    
   1.00000000    
   3.00000000    
   2.00000000    
   1.00000000    
   6.00000000    
   4.00000000    
   1.00000000    
   3.00000000    
   1.00000000    
   0.00000000    
   3.00000000    
   2.00000000    
   4.00000000    
   1.00000000    
   2.00000000    
   0.00000000    
   1.00000000    
   3.00000000    
   0.00000000    
   2.00000000    
   1.00000000    
   2.00000000    
   3.00000000    
   0.00000000    
   0.00000000    
   2.00000000    
   0.00000000    
   1.00000000    
   2.00000000    
   2.00000000    
   2.00000000    
   2.00000000    
   3.00000000    
   2.00000000    
   0.00000000    
   2.00000000    
   4.00000000    
   2.00000000    
   2.00000000    
   3.00000000    
   1.00000000    
   2.00000000    
   2.00000000    
   1.00000000    
   4.00000000    
   3.00000000    
   1.00000000    
   3.00000000    
   5.00000000    
   5.00000000    
   6.00000000    
   5.00000000    
   0.00000000    
   0.00000000    
   8.00000000    
   3.00000000    
   3.00000000    
   1.00000000    
   4.00000000    
   7.00000000    
   1.00000000    
   4.00000000    
   2.00000000    
   2.00000000    
   2.00000000    
   5.00000000    
   3.00000000    
   3.00000000    
   3.00000000    
   2.00000000    
   2.00000000    
   3.00000000    
   1.00000000    
   3.00000000    
   3.00000000    
   1.00000000    
   1.00000000    
   4.00000000    
   1.00000000    
   2.00000000    
   2.00000000    
   1.00000000    
   2.00000000    
   3.00000000    
   1.00000000    
   0.00000000    
   4.00000000    
   0.00000000    
   0.00000000    
   2.00000000    
   0.00000000    
   0.00000000    
   2.00000000    
   0.00000000    
   4.00000000    
   3.00000000    
   1.00000000    
   5.00000000    
   7.00000000    
   1.00000000    
   3.00000000    
   2.00000000    
   5.00000000    
   1.00000000    
   5.00000000    
   4.00000000    
   3.00000000    
   5.00000000    
   2.00000000    
   2.00000000    
   1.00000000    
   4.00000000    
   2.00000000    
   6.00000000    
   3.00000000    
   5.00000000    
   2.00000000    
   2.00000000    
   3.00000000    
   2.00000000    
   2.00000000    
   1.00000000    
   4.00000000    
   3.00000000    
   0.00000000    
   3.00000000    
   2.00000000    
   2.00000000    
   1.00000000    
   5.00000000    
   5.00000000    
   1.00000000    
   1.00000000    
   2.00000000    
   0.00000000    
   3.00000000    
   3.00000000    
   3.00000000    
   5.00000000    
   3.00000000    
   3.00000000    
   0.00000000    
   4.00000000    
   2.00000000    
   1.00000000    
   3.00000000    
   2.00000000    
   0.00000000    
   2.00000000    
   0.00000000    
   1.00000000    
   1.00000000    
   2.00000000    
   2.00000000    
   1.00000000    
   2.00000000    
   1.00000000    
   0.00000000    
   6.00000000    
   4.00000000    
   4.00000000    
   1.00000000    
   5.00000000    
   3.00000000    
   2.00000000    
   1.00000000    
   2.00000000    
   0.00000000    
   1.00000000    
   11.0000000    
   5.00000000    
   2.00000000    
   6.00000000    
   3.00000000    
   4.00000000    
   4.00000000    
   6.00000000    
   3.00000000    
   6.00000000    
   1.00000000    
   4.00000000    
   5.00000000    
   3.00000000    
   2.00000000    
   2.00000000    
   3.00000000    
   3.00000000    
   4.00000000    
   5.00000000    
   6.00000000    
   0.00000000    
   3.00000000    
   1.00000000    
   0.00000000    
   1.00000000    
   2.00000000    
   1.00000000    
   3.00000000    
   1.00000000    
   1.00000000    
   1.00000000    
   6.00000000    
   7.00000000    
   3.00000000    
   7.00000000    
   3.00000000    
   3.00000000    
   1.00000000    
   1.00000000    
   5.00000000    
   3.00000000    
   6.00000000    
   1.00000000    
   2.00000000    
   3.00000000    
   3.00000000    
   1.00000000    
   1.00000000    
   0.00000000    
   1.00000000    
   1.00000000    
   0.00000000    
   2.00000000    
   1.00000000    
   4.00000000    
   3.00000000    
   4.00000000    
   2.00000000    
   1.00000000    
   1.00000000    
   1.00000000    
   3.00000000    
   9.00000000    
   9.00000000    
   8.00000000    
   9.00000000    
   7.00000000    
   5.00000000    
   5.00000000    
   5.00000000    
   8.00000000    
   4.00000000    
   3.00000000    
   4.00000000    
   1.00000000    
   4.00000000    
   1.00000000    
   1.00000000    
   3.00000000    
   4.00000000    
   1.00000000    
   1.00000000    
   2.00000000    
   5.00000000    
   2.00000000    
   1.00000000    
   5.00000000    
   1.00000000    
   3.00000000    
   3.00000000    
   2.00000000    
   2.00000000    
   4.00000000    
   1.00000000    
   2.00000000    
   11.0000000    
   6.00000000    
   6.00000000    
   7.00000000    
   7.00000000    
   2.00000000    
   0.00000000    
   1.00000000    
   1.00000000    
   4.00000000    
   2.00000000    
   3.00000000    
   1.00000000    
   0.00000000    
   0.00000000    
   0.00000000    
   1.00000000    
   0.00000000    
   1.00000000    
   1.00000000    
   0.00000000    
   1.00000000    
   1.00000000    
   3.00000000    
   3.00000000    
   4.00000000    
   5.00000000    
   1.00000000    
   3.00000000    
   2.00000000    
   5.00000000    
   10.0000000    
   9.00000000    
   11.0000000    
   7.00000000    
   4.00000000    
   9.00000000    
   4.00000000    
   5.00000000    
   3.00000000    
   6.00000000    
   4.00000000    
   4.00000000    
   2.00000000    
   4.00000000    
   4.00000000    
   4.00000000    
   3.00000000    
   1.00000000    
   4.00000000    
   2.00000000    
   4.00000000    
   4.00000000    
   4.00000000    
   2.00000000    
   3.00000000    
   1.00000000    
   2.00000000    
   3.00000000    
   1.00000000    
   3.00000000    
   0.00000000    
   3.00000000    
   2.00000000    
   11.0000000    
   9.00000000    
   5.00000000    
   11.0000000    
   8.00000000    
   4.00000000    
   2.00000000    
   4.00000000    
   2.00000000    
   7.00000000    
   2.00000000    
   1.00000000    
   1.00000000    
   4.00000000    
   2.00000000    
   1.00000000    
   3.00000000    
   0.00000000    
   0.00000000    
   2.00000000    
   6.00000000    
   5.00000000    
   3.00000000    
   2.00000000    
   2.00000000    
   4.00000000    
   3.00000000    
   3.00000000    
   3.00000000    
   4.00000000    
   4.00000000    
   5.00000000    
   8.00000000    
   7.00000000    
   7.00000000    
   4.00000000    
   4.00000000    
   6.00000000    
   1.00000000    
   2.00000000    
   2.00000000    
   2.00000000    
   4.00000000    
   3.00000000    
   4.00000000    
   7.00000000    
   3.00000000    
   4.00000000    
   1.00000000    
   2.00000000    
   4.00000000    
   3.00000000    
   2.00000000    
   2.00000000    
   0.00000000    
   3.00000000    
   0.00000000    
   2.00000000    
   2.00000000    
   0.00000000    
   1.00000000    
   3.00000000    
   2.00000000    
   4.00000000    
   8.00000000    
   6.00000000    
   6.00000000    
   8.00000000    
   2.00000000    
   3.00000000    
   3.00000000    
   3.00000000    
   0.00000000    
   1.00000000    
   0.00000000    
   2.00000000    
   1.00000000    
   2.00000000    
   2.00000000    
   2.00000000    
   1.00000000    
   0.00000000    
   2.00000000    
   3.00000000    
   4.00000000    
   2.00000000    
   5.00000000    
   0.00000000    
   0.00000000    
   3.00000000    
   1.00000000    
   4.00000000    
   3.00000000    
   3.00000000    
   2.00000000    
   3.00000000    
   8.00000000    
   7.00000000    
   12.0000000    
   6.00000000    
   6.00000000    
   4.00000000    
   1.00000000    
   0.00000000    
   8.00000000    
   2.00000000    
   5.00000000    
   3.00000000    
   1.00000000    
   1.00000000    
   0.00000000    
   5.00000000    
   2.00000000    
   4.00000000    
   3.00000000    
   0.00000000    
   2.00000000    
   3.00000000    
   1.00000000    
   2.00000000    
   0.00000000    
   0.00000000    
   2.00000000    
   0.00000000    
   2.00000000    
   0.00000000    
   1.00000000    
   3.00000000    
   0.00000000    
   4.00000000    
   4.00000000    
   6.00000000    
   2.00000000    
   3.00000000    
   1.00000000    
   1.00000000    
   1.00000000    
   4.00000000    
   1.00000000    
   2.00000000    
   1.00000000    
   1.00000000    
   1.00000000    
   0.00000000    
   0.00000000    
   1.00000000    
   0.00000000    
   1.00000000    
   10.0000000    
   4.00000000    
   4.00000000    
   1.00000000    
   3.00000000    
   3.00000000    
   0.00000000    
   1.00000000    
   1.00000000    
   5.00000000    
   2.00000000    
   7.00000000    
   4.00000000    
   7.00000000    
   6.00000000    
   4.00000000    
   0.00000000    
   3.00000000    
   3.00000000    
   4.00000000    
   3.00000000    
   5.00000000    
   0.00000000    
   4.00000000    
   2.00000000    
   4.00000000    
   3.00000000    
   6.00000000    
   5.00000000    
   4.00000000    
   2.00000000    
   2.00000000    
   0.00000000    
   1.00000000    
   2.00000000    
   1.00000000    
   3.00000000    
   1.00000000    
   1.00000000    
   1.00000000    
   2.00000000    
   3.00000000    
   5.00000000    
   4.00000000    
   3.00000000    
   4.00000000    
   4.00000000    
   6.00000000    
   6.00000000    
   5.00000000    
   3.00000000    
   1.00000000    
   1.00000000    
   1.00000000    
   2.00000000    
   4.00000000    
   1.00000000    
   2.00000000    
   2.00000000    
   1.00000000    
   0.00000000    
   1.00000000    
   4.00000000    
   3.00000000    
   2.00000000    
   2.00000000    
   3.00000000    
   1.00000000    
   3.00000000    
   2.00000000    
   4.00000000    
   0.00000000    
   2.00000000    
   6.00000000    
   4.00000000    
   4.00000000    
   0.00000000    
   4.00000000    
   2.00000000    
   4.00000000    
   4.00000000    
   2.00000000    
   1.00000000    
   0.00000000    
   5.00000000    
   2.00000000    
   4.00000000    
   6.00000000    
   2.00000000    
   2.00000000    
   2.00000000    
   0.00000000    
   2.00000000    
   4.00000000    
   2.00000000    
   3.00000000    
   1.00000000    
   2.00000000    
   2.00000000    
   0.00000000    
   0.00000000    
   2.00000000    
   0.00000000    
   2.00000000    
   1.00000000    
   2.00000000    
   1.00000000    
   1.00000000    
   3.00000000    
   2.00000000    
   2.00000000    
   1.00000000    
   1.00000000    
   2.00000000    
   4.00000000    
   0.00000000    
   2.00000000    
   0.00000000    
   2.00000000    
   1.00000000    
   0.00000000    
   3.00000000    
   3.00000000    
   0.00000000    
   0.00000000    
   0.00000000    
   3.00000000    
   1.00000000    
   0.00000000    
   2.00000000    
   2.00000000    
   3.00000000    
   1.00000000    
   4.00000000    
   4.00000000    
   1.00000000    
   1.00000000    
   2.00000000    
   3.00000000    
   3.00000000    
   2.00000000    
   2.00000000    
   0.00000000    
   0.00000000    
   1.00000000    
   2.00000000    
   1.00000000    
   3.00000000    
   1.00000000    
   2.00000000    
   0.00000000    
   3.00000000    
   3.00000000    
   2.00000000    
   2.00000000    
   3.00000000    
   1.00000000    
   2.00000000    
   0.00000000    
   1.00000000    
   2.00000000    
   2.00000000    
   4.00000000    
   0.00000000    
   0.00000000    
   2.00000000    
   3.00000000    
   0.00000000    
   1.00000000    
   3.00000000    
   1.00000000    
   0.00000000    
   4.00000000    
   3.00000000    
   1.00000000    
   4.00000000    
   1.00000000    
   3.00000000    
   1.00000000    
   1.00000000    
   2.00000000    
   2.00000000    
   1.00000000    
   3.00000000    
   2.00000000    
   0.00000000    
   1.00000000    
   3.00000000    
   1.00000000    
   0.00000000    
   2.00000000    
   3.00000000    
   0.00000000    
   3.00000000    
   1.00000000    
   4.00000000    
   3.00000000    
   2.00000000    
   1.00000000    
   4.00000000    
   2.00000000    
   1.00000000    
   2.00000000    
   2.00000000    
   1.00000000    
   1.00000000    
   2.00000000    
   2.00000000    
   0.00000000    
   4.00000000    
   2.00000000    
   3.00000000    
   2.00000000    
   1.00000000    
   1.00000000    
   1.00000000    
   1.00000000    
   2.00000000    
   1.00000000    
   1.00000000    
   5.00000000    
   3.00000000    
   3.00000000    
   2.00000000    
   1.00000000    
   0.00000000    
   0.00000000    
   2.00000000    
   1.00000000    
   3.00000000    
   1.00000000    
   4.00000000    
   1.00000000    
   3.00000000    
   1.00000000    
   2.00000000    
   0.00000000    
   2.00000000    
   2.00000000    
   2.00000000    
   3.00000000    
   2.00000000    
   3.00000000    
   1.00000000    
   3.00000000    
   4.00000000    
   3.00000000    
   1.00000000    
   4.00000000    
   0.00000000    
   2.00000000    
   1.00000000    
   1.00000000    
   0.00000000    
   4.00000000    
   3.00000000    
   0.00000000    
   3.00000000    
   6.00000000    
   0.00000000    
   1.00000000    
   2.00000000    
   4.00000000    
   1.00000000    
   5.00000000    
   1.00000000    
   3.00000000    
   2.00000000    
   2.00000000    
   2.00000000    
   5.00000000    
   1.00000000    
   4.00000000    
   1.00000000    
   0.00000000    
   1.00000000    
   4.00000000    
   3.00000000    
   2.00000000    
   4.00000000    
   3.00000000    
   5.00000000    
   5.00000000    
   0.00000000    
   1.00000000    
   1.00000000    
   0.00000000    
   0.00000000    
   3.00000000    
   0.00000000    
   0.00000000    
   1.00000000    
   0.00000000    
   2.00000000    
   0.00000000    
   1.00000000    
   2.00000000    
   2.00000000    
   2.00000000    
   1.00000000    
   1.00000000    
   0.00000000    
   5.00000000    
   1.00000000    
   4.00000000    
   1.00000000    
   0.00000000    
   2.00000000    
   2.00000000    
   1.00000000    
   0.00000000    
   2.00000000    
   1.00000000    
   3.00000000    
   0.00000000    
   0.00000000    
   2.00000000    
   1.00000000    
   2.00000000    
   3.00000000    
   2.00000000    
   1.00000000    
   2.00000000    
   2.00000000    
   4.00000000    
   9.00000000    
   0.00000000    
   2.00000000    
   4.00000000    
   1.00000000    
   1.00000000    
   2.00000000    
   1.00000000    
   3.00000000    
   0.00000000    
   2.00000000    
   2.00000000    
   4.00000000    
   1.00000000    
   5.00000000    
   1.00000000    
   2.00000000    
   1.00000000    
   2.00000000    
   2.00000000    
   3.00000000    
   5.00000000    
   1.00000000    
   3.00000000    
   2.00000000    
   2.00000000    
   0.00000000    
   1.00000000    
   2.00000000    
   2.00000000    
   3.00000000    
   2.00000000    
   0.00000000    
   0.00000000    
   2.00000000    
   1.00000000    
   0.00000000    
   2.00000000    
   2.00000000    
   3.00000000    
   1.00000000    
   1.00000000    
   0.00000000    
   1.00000000    
   5.00000000    
   2.00000000    
   1.00000000    
   0.00000000    
   0.00000000    
   3.00000000    
   3.00000000    
   0.00000000    
   2.00000000    
   1.00000000    
   2.00000000    
   0.00000000    
   0.00000000    
   1.00000000    
   4.00000000    
   4.00000000    
   3.00000000    
   2.00000000    
   2.00000000    
   3.00000000    
   3.00000000    
   1.00000000    
   3.00000000    
   4.00000000    
   0.00000000    
   1.00000000    
   5.00000000    
   3.00000000    
   2.00000000    
   2.00000000    
   3.00000000    
   4.00000000    
   2.00000000    
   2.00000000    
   3.00000000    
   3.00000000    
   3.00000000    
   5.00000000    
   1.00000000    
   1.00000000    
   3.00000000    
   1.00000000    
   2.00000000    
   3.00000000    
   3.00000000    
   2.00000000    
   2.00000000    
   1.00000000    
   0.00000000    
   3.00000000    
   1.00000000    
   0.00000000    
   0.00000000    
   0.00000000    
   1.00000000    
   1.00000000    
   1.00000000    
   3.00000000    
   1.00000000    
   0.00000000    
   1.00000000    
   1.00000000    
   1.00000000    
   1.00000000    
   4.00000000    
   2.00000000    
   0.00000000    
   1.00000000    
   2.00000000    
   1.00000000    
   1.00000000    
   0.00000000    
   1.00000000    
   1.00000000    
   2.00000000    
   2.00000000    
   0.00000000    
   2.00000000    
   1.00000000    
   2.00000000    
   1.00000000    
   3.00000000    
   3.00000000    
   2.00000000    
   2.00000000    
   2.00000000    
   4.00000000    
   1.00000000    
   3.00000000    
   4.00000000    
   3.00000000    
   3.00000000    
   3.00000000    
   2.00000000    
   1.00000000    
   1.00000000    
   3.00000000    
   2.00000000    
   2.00000000    
   1.00000000    
   1.00000000    
   4.00000000    
   4.00000000    
   6.00000000    
   3.00000000    
   1.00000000    
   1.00000000    
   2.00000000    
   1.00000000    
   0.00000000    
   0.00000000    
   1.00000000    
   2.00000000    
   0.00000000    
   4.00000000    
   1.00000000    
   2.00000000    
   1.00000000    
   0.00000000    
   2.00000000    
   0.00000000    
   1.00000000    
   1.00000000    
   2.00000000    
   3.00000000    
   3.00000000    
   3.00000000    
   1.00000000    
   3.00000000    
   1.00000000    
   2.00000000    
   4.00000000    
   1.00000000    
   2.00000000    
   1.00000000    
   2.00000000    
   2.00000000    
   0.00000000    
   2.00000000    
   2.00000000    
   0.00000000    
   2.00000000    
   3.00000000    
   0.00000000    
   4.00000000    
   1.00000000    
   3.00000000    
   4.00000000    
   3.00000000    
   0.00000000    
   3.00000000    
   3.00000000    
   3.00000000    
   4.00000000    
   0.00000000    
   0.00000000    
   4.00000000    
   2.00000000    
   1.00000000    
   4.00000000    
   1.00000000    
   2.00000000    
   0.00000000    
   4.00000000    
   5.00000000    
   2.00000000    
   3.00000000    
   4.00000000    
   2.00000000    
   2.00000000    
   3.00000000    
   2.00000000    
   3.00000000    
   1.00000000    
   2.00000000    
   2.00000000    
   1.00000000    
   1.00000000    
   1.00000000    
   2.00000000    
   1.00000000    
   1.00000000    
   2.00000000    
   0.00000000    
   2.00000000    
   0.00000000    
   0.00000000    
   2.00000000    
   3.00000000    
   5.00000000    
   2.00000000    
   1.00000000    
   0.00000000    
   1.00000000    
   4.00000000    
   1.00000000    
   0.00000000    
   0.00000000    
   1.00000000    
   1.00000000    
   2.00000000    
   0.00000000    
   2.00000000    
   1.00000000    
   1.00000000    
   1.00000000    
   2.00000000    
   0.00000000    
   3.00000000    
   2.00000000    
   1.00000000    
   4.00000000    
   1.00000000    
   0.00000000    
   1.00000000    
   3.00000000    
   1.00000000    
   1.00000000    
   2.00000000    
   4.00000000    
   1.00000000    
   2.00000000    
   4.00000000    
   1.00000000    
   4.00000000    
   1.00000000    
   2.00000000    
   1.00000000    
   2.00000000    
   2.00000000    
   1.00000000    
   1.00000000    
   2.00000000    
   0.00000000    
   1.00000000    
   4.00000000    
   0.00000000    
   3.00000000    
   0.00000000    
   3.00000000    
   2.00000000    
   3.00000000    
   3.00000000    
   2.00000000    
   0.00000000    
   1.00000000    
   0.00000000    
   2.00000000    
   2.00000000    
   1.00000000    
   1.00000000    
   0.00000000    
   1.00000000    
   2.00000000    
   1.00000000    
   1.00000000    
   1.00000000    
   5.00000000    
   1.00000000    
   1.00000000    
   2.00000000    
   1.00000000    
   2.00000000    
   0.00000000    
   1.00000000    
   1.00000000    
   1.00000000    
   1.00000000    
   1.00000000    
   2.00000000    
   3.00000000    
   0.00000000    
   2.00000000    
   4.00000000    
   4.00000000    
   2.00000000    
   1.00000000    
   5.00000000    
   0.00000000    
   4.00000000    
   0.00000000    
   2.00000000    
   1.00000000    
   0.00000000    
   3.00000000    
   2.00000000    
   3.00000000    
   1.00000000    
   0.00000000    
   2.00000000    
   1.00000000    
   2.00000000    
   2.00000000    
   2.00000000    
   5.00000000    
   3.00000000    
   3.00000000    
   3.00000000    
   1.00000000    
   1.00000000    
   3.00000000    
   2.00000000    
   1.00000000    
   5.00000000    
   1.00000000    
   1.00000000    
   1.00000000    
   2.00000000    
   2.00000000    
   3.00000000    
   1.00000000    
   0.00000000    
   1.00000000    
   4.00000000    
   3.00000000    
   1.00000000    
   2.00000000    
   1.00000000    
   2.00000000    
   1.00000000    
   0.00000000    
   1.00000000    
   2.00000000    
   1.00000000    
   0.00000000    
   2.00000000    
   1.00000000    
   2.00000000    
   2.00000000    
   0.00000000    
   0.00000000    
   0.00000000    
   2.00000000    
   3.00000000    
   4.00000000    
   0.00000000    
   2.00000000    
   2.00000000    
   2.00000000    
   1.00000000    
   2.00000000    
   1.00000000    
   2.00000000    
   1.00000000    
   0.00000000    
   4.00000000    
   3.00000000    
   1.00000000    
   2.00000000    
   0.00000000    
   0.00000000    
   0.00000000    
   1.00000000    
   1.00000000    
   1.00000000    
   3.00000000    
   1.00000000    
   0.00000000    
   1.00000000    
   1.00000000    
   1.00000000    
   3.00000000    
   1.00000000    
   2.00000000    
   2.00000000    
   4.00000000    
   3.00000000    
   4.00000000    
   1.00000000    
   0.00000000    
   2.00000000    
   1.00000000    
   2.00000000    
   1.00000000    
   1.00000000    
   0.00000000    
   1.00000000    
   3.00000000    
   0.00000000    
   1.00000000    
   0.00000000    
   1.00000000    
   1.00000000    
   3.00000000    
   1.00000000    
   3.00000000    
   1.00000000    
   2.00000000    
   2.00000000    
   4.00000000    
   1.00000000    
   0.00000000    
   0.00000000    
   2.00000000    
   0.00000000    
   1.00000000    
   2.00000000    
   4.00000000    
   3.00000000    
   2.00000000    
   0.00000000    
   1.00000000    
   4.00000000    
   1.00000000    
   0.00000000    
   1.00000000    
   3.00000000    
   1.00000000    
   1.00000000    
   3.00000000    
   2.00000000    
   2.00000000    
   4.00000000    
   2.00000000    
   0.00000000    
   2.00000000    
   3.00000000    
   2.00000000    
   1.00000000    
   2.00000000    
   0.00000000    
   0.00000000    
   2.00000000    
   0.00000000    
   3.00000000    
   3.00000000    
   6.00000000    
   11.0000000    
   11.0000000    
   8.00000000    
   0.00000000    
   3.00000000    
   3.00000000    
   4.00000000    
   0.00000000    
   1.00000000    
   3.00000000    
   0.00000000    
   2.00000000    
   2.00000000    
   0.00000000    
   1.00000000    
   1.00000000    
   0.00000000    
   3.00000000    
   2.00000000    
   0.00000000    
   2.00000000    
   0.00000000    
   0.00000000    
   3.00000000    
   3.00000000    
   2.00000000    
   0.00000000    
   1.00000000    
   1.00000000    
   1.00000000    
   2.00000000    
   1.00000000    
   1.00000000    
   1.00000000    
   1.00000000    
   0.00000000    
   0.00000000    
   3.00000000    
   1.00000000    
   1.00000000    
   0.00000000    
   1.00000000    
   0.00000000    
   0.00000000    
   0.00000000    
   1.00000000    
   2.00000000    
   1.00000000    
   2.00000000    
   1.00000000    
   1.00000000    
   1.00000000    
   1.00000000    
   4.00000000    
   1.00000000    
   1.00000000    
   3.00000000    
   3.00000000    
   5.00000000    
   2.00000000    
   3.00000000    
   3.00000000    
   5.00000000    
   7.00000000    
   6.00000000    
   9.00000000    
   6.00000000    
   4.00000000    
   4.00000000    
   2.00000000    
   3.00000000    
   2.00000000    
   0.00000000    
   1.00000000    
   1.00000000    
   3.00000000    
   3.00000000    
   1.00000000    
   2.00000000    
   0.00000000    
   3.00000000    
   2.00000000    
   1.00000000    
   2.00000000    
   1.00000000    
   3.00000000    
   2.00000000    
   2.00000000    
   2.00000000    
   2.00000000    
   3.00000000    
   1.00000000    
   0.00000000    
   4.00000000    
   1.00000000    
   2.00000000    
   1.00000000    
   0.00000000    
   1.00000000    
   0.00000000    
   0.00000000    
   1.00000000    
   0.00000000    
   2.00000000    
   2.00000000    
   1.00000000    
   0.00000000    
   0.00000000    
   0.00000000    
   1.00000000    
   4.00000000    
   2.00000000    
   2.00000000    
   3.00000000    
   5.00000000    
   6.00000000    
   0.00000000    
   2.00000000    
   1.00000000    
   0.00000000    
   2.00000000    
   1.00000000    
   3.00000000    
   0.00000000    
   2.00000000    
   1.00000000    
   3.00000000    
   3.00000000    
   6.00000000    
   5.00000000    
   6.00000000    
   4.00000000    
   4.00000000    
   2.00000000    
   1.00000000    
   2.00000000    
   5.00000000    
   1.00000000    
   1.00000000    
   3.00000000    
   5.00000000    
   2.00000000    
   1.00000000    
   1.00000000    
   2.00000000    
   1.00000000    
   0.00000000    
   1.00000000    
   4.00000000    
   1.00000000    
   1.00000000    
   4.00000000    
   1.00000000    
   3.00000000    
   2.00000000    
   1.00000000    
   0.00000000    
   1.00000000    
   1.00000000    
   0.00000000    
   1.00000000    
   0.00000000    
   3.00000000    
   1.00000000    
   2.00000000    
   2.00000000    
   3.00000000    
   4.00000000    
   3.00000000    
   1.00000000    
   3.00000000    
   2.00000000    
   2.00000000    
   3.00000000    
   3.00000000    
   2.00000000    
   3.00000000    
   2.00000000    
   2.00000000    
   1.00000000    
   2.00000000    
   2.00000000    
   1.00000000    
   4.00000000    
   3.00000000    
   4.00000000    
   0.00000000    
   1.00000000    
   4.00000000    
   1.00000000    
   3.00000000    
   7.00000000    
   7.00000000    
   11.0000000    
   8.00000000    
   6.00000000    
   6.00000000    
   1.00000000    
   4.00000000    
   2.00000000    
   1.00000000    
   0.00000000    
   1.00000000    
   3.00000000    
   2.00000000    
   1.00000000    
   2.00000000    
   1.00000000    
   0.00000000    
   2.00000000    
   1.00000000    
   2.00000000    
   3.00000000    
   0.00000000    
   4.00000000    
   2.00000000    
   0.00000000    
   1.00000000    
   0.00000000    
   1.00000000    
   0.00000000    
   0.00000000    
   3.00000000    
   3.00000000    
   1.00000000    
   1.00000000    
   1.00000000    
   0.00000000    
   4.00000000    
   2.00000000    
   1.00000000    
   0.00000000    
   1.00000000    
   0.00000000    
   0.00000000    
   0.00000000    
   1.00000000    
   1.00000000    
   0.00000000    
   0.00000000    
   2.00000000    
   1.00000000    
   2.00000000    
   1.00000000    
   2.00000000    
   5.00000000    
   2.00000000    
   4.00000000    
   1.00000000    
   0.00000000    
   2.00000000    
   2.00000000    
   1.00000000    
   4.00000000    
   0.00000000    
   3.00000000    
   7.00000000    
   8.00000000    
   2.00000000    
   2.00000000    
   6.00000000    
   1.00000000    
   1.00000000    
   3.00000000    
   4.00000000    
   1.00000000    
   1.00000000    
   1.00000000    
   1.00000000    
   1.00000000    
   1.00000000    
   3.00000000    
   2.00000000    
   1.00000000    
   4.00000000    
   3.00000000    
   6.00000000    
   2.00000000    
   2.00000000    
   3.00000000    
   1.00000000    
   2.00000000    
   3.00000000    
   2.00000000    
   3.00000000    
   1.00000000    
   0.00000000    
   4.00000000    
   2.00000000    
   3.00000000    
   1.00000000    
   2.00000000    
   0.00000000    
   1.00000000    
   3.00000000    
   0.00000000    
   1.00000000    
   0.00000000    
   1.00000000    
   2.00000000    
   5.00000000    
   0.00000000    
   1.00000000    
   0.00000000    
   2.00000000    
   2.00000000    
   3.00000000    
   2.00000000    
   3.00000000    
   1.00000000    
   2.00000000    
   0.00000000    
   2.00000000    
   2.00000000    
   1.00000000    
   2.00000000    
   2.00000000    
   1.00000000    
   4.00000000    
   3.00000000    
   2.00000000    
   4.00000000    
   3.00000000    
   3.00000000    
   5.00000000    
   2.00000000    
   3.00000000    
   2.00000000    
   1.00000000    
   5.00000000    
   4.00000000    
   3.00000000    
   0.00000000    
   1.00000000    
   0.00000000    
   1.00000000    
   0.00000000    
   3.00000000    
   1.00000000    
   0.00000000    
   2.00000000    
   2.00000000    
   0.00000000    
   1.00000000    
   1.00000000    
   1.00000000    
   6.00000000    
   3.00000000    
   0.00000000    
   4.00000000    
   2.00000000    
   3.00000000    
   2.00000000    
   1.00000000    
   0.00000000    
   1.00000000    
   2.00000000    
   1.00000000    
   2.00000000    
   2.00000000    
   1.00000000    
   2.00000000    
   2.00000000    
   0.00000000    
   2.00000000    
   1.00000000    
   4.00000000    
   3.00000000    
   1.00000000    
   3.00000000    
   1.00000000    
   2.00000000    
   0.00000000    
   1.00000000    
   1.00000000    
   2.00000000    
   1.00000000    
   4.00000000    
   3.00000000    
   3.00000000    
   0.00000000    
   2.00000000    
   2.00000000    
   1.00000000    
   0.00000000    
   2.00000000    
   3.00000000    
   1.00000000    
   3.00000000    
   4.00000000    
   1.00000000    
   3.00000000    
   0.00000000    
   2.00000000    
   2.00000000    
   1.00000000    
   1.00000000    
   5.00000000    
   1.00000000    
   3.00000000    
   0.00000000    
   2.00000000    
   1.00000000    
   4.00000000    
   2.00000000    
   0.00000000    
   2.00000000    
   0.00000000    
   2.00000000    
   1.00000000    
   4.00000000    
   1.00000000    
   0.00000000    
   1.00000000    
   1.00000000    
   6.00000000    
   5.00000000    
   1.00000000    
   0.00000000    
   0.00000000    
   0.00000000    
   2.00000000    
   1.00000000    
   2.00000000    
   1.00000000    
   1.00000000    
   2.00000000    
   2.00000000    
   0.00000000    
   0.00000000    
   1.00000000    
   1.00000000    
   3.00000000    
   0.00000000    
   1.00000000    
   3.00000000    
   2.00000000    
   2.00000000    
   1.00000000    
   3.00000000    
   5.00000000    
   1.00000000    
   1.00000000    
   3.00000000    
   1.00000000    
   2.00000000    
   1.00000000    
   1.00000000    
   1.00000000    
   4.00000000    
   3.00000000    
   1.00000000    
   1.00000000    
   0.00000000    
   1.00000000    
   1.00000000    
   2.00000000    
   1.00000000    
   0.00000000    
   2.00000000    
   4.00000000    
   1.00000000    
   2.00000000    
   1.00000000    
   3.00000000    
   2.00000000    
   4.00000000    
   2.00000000    
   3.00000000    
   1.00000000    
   0.00000000    
   0.00000000    
   0.00000000    
   2.00000000    
   3.00000000    
   1.00000000    
   1.00000000    
   1.00000000    
   3.00000000    
   3.00000000    
   0.00000000    
   1.00000000    
   1.00000000    
   2.00000000    
   4.00000000    
   3.00000000    
   0.00000000    
   2.00000000    
   4.00000000    
   2.00000000    
   3.00000000    
   2.00000000    
   1.00000000    
   1.00000000    
   3.00000000    
   0.00000000    
   0.00000000    
   2.00000000    
   3.00000000    
   2.00000000    
   2.00000000    
   3.00000000    
   3.00000000    
   0.00000000    
   3.00000000    
   1.00000000    
   2.00000000    
   0.00000000    
   3.00000000    
   1.00000000    
   3.00000000    
   5.00000000    
   1.00000000    
   2.00000000    
   0.00000000    
   1.00000000    
   1.00000000    
   2.00000000    
   2.00000000    
   3.00000000    
   2.00000000    
   0.00000000    
   1.00000000    
   4.00000000    
   1.00000000    
   1.00000000    
   1.00000000    
   2.00000000    
   3.00000000    
   2.00000000    
   1.00000000    
   0.00000000    
   1.00000000    
   1.00000000    
   2.00000000    
   0.00000000    
   2.00000000    
   0.00000000    
   0.00000000    
   2.00000000    
   4.00000000    
   5.00000000    
   1.00000000    
   2.00000000    
   2.00000000    
   1.00000000    
   1.00000000    
   1.00000000    
   2.00000000    
   1.00000000    
   3.00000000    
   1.00000000    
   2.00000000    
   2.00000000    
   1.00000000    
   1.00000000    
   0.00000000    
   1.00000000    
   2.00000000    
   2.00000000    
   2.00000000    
   1.00000000    
   0.00000000    
   3.00000000    
   1.00000000    
   1.00000000    
   2.00000000    
   3.00000000    
   4.00000000    
   2.00000000    
   6.00000000    
   2.00000000    
   0.00000000    
   2.00000000    
   2.00000000    
   3.00000000    
   4.00000000    
   7.00000000    
   1.00000000    
   4.00000000    
   1.00000000    
   0.00000000    
   2.00000000    
   4.00000000    
   1.00000000    
   0.00000000    
   2.00000000    
   1.00000000    
   0.00000000    
   2.00000000    
   0.00000000    
   2.00000000    
   2.00000000    
   2.00000000    
   3.00000000    
   1.00000000    
   2.00000000    
   1.00000000    
   1.00000000    
   2.00000000    
   0.00000000    
   2.00000000    
   2.00000000    
   2.00000000    
   1.00000000    
   4.00000000    
   1.00000000    
   2.00000000    
   0.00000000    
   0.00000000    
   2.00000000    
   5.00000000    
   2.00000000    
   1.00000000    
   1.00000000    
   1.00000000    
   2.00000000    
   1.00000000    
   3.00000000    
   2.00000000    
   2.00000000    
   2.00000000    
   1.00000000    
   1.00000000    
   3.00000000    
   2.00000000    
   1.00000000    
   1.00000000    
   0.00000000    
   2.00000000    
   2.00000000    
   4.00000000    
   3.00000000    
   2.00000000    
   0.00000000    
   0.00000000    
   2.00000000    
   3.00000000    
   0.00000000    
   6.00000000    
   2.00000000    
   2.00000000    
   0.00000000    
   1.00000000    
   2.00000000    
   2.00000000    
   1.00000000    
   3.00000000    
   0.00000000    
   3.00000000    
   1.00000000    
   2.00000000    
   0.00000000    
   1.00000000    
   2.00000000    
   4.00000000    
   0.00000000    
   3.00000000    
   2.00000000    
   0.00000000    
   3.00000000    
   6.00000000    
   4.00000000    
   3.00000000    
   0.00000000    
   2.00000000    
   0.00000000    
   2.00000000    
   7.00000000    
   2.00000000    
   2.00000000    
   4.00000000    
   3.00000000    
   1.00000000    
   1.00000000    
   3.00000000    
   0.00000000    
   2.00000000    
   2.00000000    
   2.00000000    
   2.00000000    
   3.00000000    
   2.00000000    
   2.00000000    
   2.00000000    
   2.00000000    
   1.00000000    
   4.00000000    
   2.00000000    
   0.00000000    
   1.00000000    
   4.00000000    
   1.00000000    
   1.00000000    
   2.00000000    
   2.00000000    
   3.00000000    
   2.00000000    
   2.00000000    
   4.00000000    
   1.00000000    
   1.00000000    
   2.00000000    
   1.00000000    
   3.00000000    
   1.00000000    
   2.00000000    
   2.00000000    
   4.00000000    
   1.00000000    
   3.00000000    
   1.00000000    
   2.00000000    
   3.00000000    
   1.00000000    
   1.00000000    
   1.00000000    
   2.00000000    
   1.00000000    
   1.00000000    
   1.00000000    
   1.00000000    
   1.00000000    
   1.00000000    
   2.00000000    
   3.00000000    
   1.00000000    
   1.00000000    
   2.00000000    
   2.00000000    
   2.00000000    
   2.00000000    
   3.00000000    
   2.00000000    
   4.00000000    
   1.00000000    
   3.00000000    
   1.00000000    
   1.00000000    
   2.00000000    
   2.00000000    
   0.00000000    
   1.00000000    
   3.00000000    
   1.00000000    
   4.00000000    
   3.00000000    
   0.00000000    
   4.00000000    
   3.00000000    
   1.00000000    
   2.00000000    
   1.00000000    
   2.00000000    
   3.00000000    
   1.00000000    
   3.00000000    
   1.00000000    
   1.00000000    
   1.00000000    
   2.00000000    
   1.00000000    
   0.00000000    
   0.00000000    
   2.00000000    
   0.00000000    
   0.00000000    
   2.00000000    
   1.00000000    
   1.00000000    
   1.00000000    
   1.00000000    
   1.00000000    
   0.00000000    
   2.00000000    
   4.00000000    
   1.00000000    
   0.00000000    
   0.00000000    
   2.00000000    
   1.00000000    
   0.00000000    
   2.00000000    
   0.00000000    
   1.00000000    
   0.00000000    
   0.00000000    
   0.00000000    
   3.00000000    
   0.00000000    
   0.00000000    
   1.00000000    
   4.00000000    
   1.00000000    
   7.00000000    
   3.00000000    
   4.00000000    
   2.00000000    
   1.00000000    
   0.00000000    
   2.00000000    
   2.00000000    
   0.00000000    
   1.00000000    
   0.00000000    
   2.00000000    
   3.00000000    
   2.00000000    
   0.00000000    
   3.00000000    
   1.00000000    
   1.00000000    
   0.00000000    
   2.00000000    
   2.00000000    
   1.00000000    
   2.00000000    
   0.00000000    
   1.00000000    
   2.00000000    
   1.00000000    
   2.00000000    
   0.00000000    
   2.00000000    
   3.00000000    
   1.00000000    
   1.00000000    
   0.00000000    
   3.00000000    
   4.00000000    
   1.00000000    
   3.00000000    
   0.00000000    
   4.00000000    
   2.00000000    
   1.00000000    
   2.00000000    
   3.00000000    
   0.00000000    
   0.00000000    
   3.00000000    
   2.00000000    
   1.00000000    
   2.00000000    
   2.00000000    
   1.00000000    
   2.00000000    
   0.00000000    
   1.00000000    
   4.00000000    
   1.00000000    
   0.00000000    
   1.00000000    
   4.00000000    
   1.00000000    
   1.00000000    
   5.00000000    
   4.00000000    
   2.00000000    
   2.00000000    
   2.00000000    
   0.00000000    
   3.00000000    
   4.00000000    
   2.00000000    
   2.00000000    
   0.00000000    
   3.00000000    
   0.00000000    
   3.00000000    
   2.00000000    
   2.00000000    
   0.00000000    
   3.00000000    
   2.00000000    
   0.00000000    
   1.00000000    
   2.00000000    
   0.00000000    
   1.00000000    
   2.00000000    
   0.00000000    
   2.00000000    
   1.00000000    
   0.00000000    
   1.00000000    
   0.00000000    
   1.00000000    
   2.00000000    
   1.00000000    
   0.00000000    
   0.00000000    
   0.00000000    
   0.00000000    
   1.00000000    
   3.00000000    
   0.00000000    
   2.00000000    
   2.00000000    
   1.00000000    
   2.00000000    
   3.00000000    
   1.00000000    
   2.00000000    
   0.00000000    
   1.00000000    
   1.00000000    
   0.00000000    
   0.00000000    
   1.00000000    
   0.00000000    
   2.00000000    
   2.00000000    
   1.00000000    
   1.00000000    
   3.00000000    
   0.00000000    
   2.00000000    
   1.00000000    
   3.00000000    
   1.00000000    
   1.00000000    
   2.00000000    
   4.00000000    
   1.00000000    
   3.00000000    
   0.00000000    
   1.00000000    
   1.00000000    
   1.00000000    
   2.00000000    
   0.00000000    
   4.00000000    
   1.00000000    
   1.00000000    
   2.00000000    
   6.00000000    
   1.00000000    
   0.00000000    
   2.00000000    
   1.00000000    
   3.00000000    
   0.00000000    
   2.00000000    
   1.00000000    
   0.00000000    
   1.00000000    
   2.00000000    
   2.00000000    
   2.00000000    
   1.00000000    
   1.00000000    
   1.00000000    
   0.00000000    
   2.00000000    
   0.00000000    
   0.00000000    
   0.00000000    
   2.00000000    
   1.00000000    
   0.00000000    
   1.00000000    
   2.00000000    
   0.00000000    
   1.00000000    
   0.00000000    
   3.00000000    
   1.00000000    
   0.00000000    
   2.00000000    
   2.00000000    
   2.00000000    
   2.00000000    
   1.00000000    
   0.00000000    
   0.00000000    
   1.00000000    
   2.00000000    
   0.00000000    
   3.00000000    
   4.00000000    
   3.00000000    
   6.00000000    
   3.00000000    
   2.00000000    
   2.00000000    
   4.00000000    
   1.00000000    
   0.00000000    
   4.00000000    
   1.00000000    
   2.00000000    
   2.00000000    
   1.00000000    
   2.00000000    
   4.00000000    
   0.00000000    
   0.00000000    
   1.00000000    
   1.00000000    
   3.00000000    
   2.00000000    
   1.00000000    
   2.00000000    
   1.00000000    
   5.00000000    
   1.00000000    
   1.00000000    
   0.00000000    
   2.00000000    
   1.00000000    
   1.00000000    
   0.00000000    
   0.00000000    
   0.00000000    
   1.00000000    
   0.00000000    
   0.00000000    
   0.00000000    
   2.00000000    
   2.00000000    
   2.00000000    
   2.00000000    
   1.00000000    
   1.00000000    
   3.00000000    
   1.00000000    
   0.00000000    
   0.00000000    
   0.00000000    
   1.00000000    
   1.00000000    
   2.00000000    
   0.00000000    
   2.00000000    
   2.00000000    
   1.00000000    
   1.00000000    
   0.00000000    
   1.00000000    
   1.00000000    
   1.00000000    
   1.00000000    
   1.00000000    
   2.00000000    
   2.00000000    
   5.00000000    
   0.00000000    
   2.00000000    
   0.00000000    
   3.00000000    
   3.00000000    
   2.00000000    
   2.00000000    
   1.00000000    
   2.00000000    
   6.00000000    
   3.00000000    
   2.00000000    
   1.00000000    
   2.00000000    
   2.00000000    
   2.00000000    
   2.00000000    
   1.00000000    
   1.00000000    
   2.00000000    
   1.00000000    
   1.00000000    
   2.00000000    
   5.00000000    
   1.00000000    
   3.00000000    
   0.00000000    
   1.00000000    
   2.00000000    
   1.00000000    
   0.00000000    
   1.00000000    
   0.00000000    
   1.00000000    
   0.00000000    
   3.00000000    
   2.00000000    
   0.00000000    
   0.00000000    
   1.00000000    
   0.00000000    
   0.00000000    
   0.00000000    
   0.00000000    
   1.00000000    
   1.00000000    
   0.00000000    
   0.00000000    
   0.00000000    
   1.00000000    
   0.00000000    
   0.00000000    
   0.00000000    
   1.00000000    
   1.00000000    
   2.00000000    
   2.00000000    
   1.00000000    
   0.00000000    
   0.00000000    
   1.00000000    
   3.00000000    
   1.00000000    
   1.00000000    
   1.00000000    
   1.00000000    
   0.00000000    
   1.00000000    
   1.00000000    
   2.00000000    
   2.00000000    
   1.00000000    
   1.00000000    
   3.00000000    
   4.00000000    
   2.00000000    
   4.00000000    
   3.00000000    
   4.00000000    
   6.00000000    
   1.00000000    
   0.00000000    
   1.00000000    
   4.00000000    
   3.00000000    
   5.00000000    
   3.00000000    
   1.00000000    
   5.00000000    
   4.00000000    
   3.00000000    
   4.00000000    
   4.00000000    
   3.00000000    
   3.00000000    
   2.00000000    
   2.00000000    
   2.00000000    
   5.00000000    
   1.00000000    
   1.00000000    
   2.00000000    
   2.00000000    
   3.00000000    
   3.00000000    
   1.00000000    
   2.00000000    
   1.00000000    
   1.00000000    
   2.00000000    
   0.00000000    
   0.00000000    
   1.00000000    
   1.00000000    
   4.00000000    
   0.00000000    
   0.00000000    
   1.00000000    
   3.00000000    
   0.00000000    
   2.00000000    
   1.00000000    
   2.00000000    
   0.00000000    
   3.00000000    
   0.00000000    
   0.00000000    
   3.00000000    
   0.00000000    
   2.00000000    
   0.00000000    
   2.00000000    
   1.00000000    
   3.00000000    
   1.00000000    
   0.00000000    
   0.00000000    
   4.00000000    
   1.00000000    
   4.00000000    
   0.00000000    
   3.00000000    
   6.00000000    
   2.00000000    
   1.00000000    
   1.00000000    
   3.00000000    
   4.00000000    
   2.00000000    
   4.00000000    
   3.00000000    
   5.00000000    
   3.00000000    
   5.00000000    
   2.00000000    
   2.00000000    
   4.00000000    
   2.00000000    
   1.00000000    
   4.00000000    
   3.00000000    
   2.00000000    
   4.00000000    
   2.00000000    
   5.00000000    
   2.00000000    
   0.00000000    
   2.00000000    
   1.00000000    
   2.00000000    
   3.00000000    
   1.00000000    
   1.00000000    
   3.00000000    
   0.00000000    
   2.00000000    
   4.00000000    
   6.00000000    
   0.00000000    
   1.00000000    
   1.00000000    
   2.00000000    
   2.00000000    
   1.00000000    
   1.00000000    
   1.00000000    
   0.00000000    
   1.00000000    
   3.00000000    
   4.00000000    
   2.00000000    
   1.00000000    
   0.00000000    
   6.00000000    
   2.00000000    
   1.00000000    
   0.00000000    
   2.00000000    
   2.00000000    
   0.00000000    
   3.00000000    
   3.00000000    
   3.00000000    
   3.00000000    
   3.00000000    
   2.00000000    
   2.00000000    
   3.00000000    
   5.00000000    
   4.00000000    
   2.00000000    
   7.00000000    
   7.00000000    
   3.00000000    
   6.00000000    
   4.00000000    
   3.00000000    
   3.00000000    
   4.00000000    
   2.00000000    
   2.00000000    
   0.00000000    
   4.00000000    
   2.00000000    
   1.00000000    
   2.00000000    
   4.00000000    
   3.00000000    
   5.00000000    
   2.00000000    
   2.00000000    
   4.00000000    
   6.00000000    
   2.00000000    
   1.00000000    
   5.00000000    
   2.00000000    
   4.00000000    
   2.00000000    
   2.00000000    
   3.00000000    
   3.00000000    
   1.00000000    
   3.00000000    
   1.00000000    
   4.00000000    
   3.00000000    
   2.00000000    
   2.00000000    
   0.00000000    
   3.00000000    
   1.00000000    
   2.00000000    
   2.00000000    
   1.00000000    
   1.00000000    
   2.00000000    
   3.00000000    
   1.00000000    
   1.00000000    
   2.00000000    
   0.00000000    
   2.00000000    
   3.00000000    
   1.00000000    
   0.00000000    
   2.00000000    
   4.00000000    
   6.00000000    
   2.00000000    
   6.00000000    
   6.00000000    
   2.00000000    
   2.00000000    
   6.00000000    
   2.00000000    
   0.00000000    
   0.00000000    
   2.00000000    
   12.0000000    
   6.00000000    
   0.00000000    
   2.00000000    
   2.00000000    
   4.00000000    
   2.00000000    
   0.00000000    
   4.00000000    
   2.00000000    
   6.00000000    
   4.00000000    
   2.00000000    
   6.00000000    
   0.00000000    
   0.00000000    
   0.00000000    
   2.00000000    
   6.00000000    
   8.00000000    
   0.00000000    
   0.00000000    
   0.00000000    
   2.00000000    
   2.00000000    
   4.00000000    
   6.00000000    
   2.00000000    
   2.00000000    
   4.00000000    
   4.00000000    
   4.00000000    
   0.00000000    
   4.00000000    
   2.00000000    
   0.00000000    
   2.00000000    
   0.00000000    
   2.00000000    
   2.00000000    
   6.00000000    
   2.00000000    
   2.00000000    
   0.00000000    
   0.00000000    
   0.00000000    
   4.00000000    
   0.00000000    
   2.00000000    
   2.00000000    
   2.00000000    
   2.00000000    
   6.00000000    
   2.00000000    
   3.00000000    
   6.00000000    
   2.00000000    
   5.00000000    
   2.00000000    
   10.0000000    
   7.00000000    
   2.00000000    
   0.00000000    
   4.00000000    
   4.00000000    
   3.00000000    
   3.00000000    
   3.00000000    
   2.00000000    
   1.00000000    
   8.00000000    
   5.00000000    
   2.00000000    
   2.00000000    
   1.00000000    
   3.00000000    
   2.00000000    
   1.00000000    
   1.00000000    
   6.00000000    
   2.00000000    
   2.00000000    
   1.00000000    
   5.00000000    
   4.00000000    
   3.00000000    
   0.00000000    
   3.00000000    
   3.00000000    
   3.00000000    
   5.00000000    
   7.00000000    
   4.00000000    
   2.00000000    
   4.00000000    
   2.00000000    
   3.00000000    
   1.00000000    
   5.00000000    
   4.00000000    
   2.00000000    
   3.00000000    
   3.00000000    
   1.00000000    
   0.00000000    
   0.00000000    
   1.00000000    
   3.00000000    
   1.00000000    
   1.00000000    
   1.00000000    
   2.00000000    
   2.00000000    
   3.00000000    
   2.00000000    
   1.00000000    
   1.00000000    
   1.00000000    
   5.00000000    
   2.00000000    
   5.00000000    
   4.00000000    
   3.00000000    
   2.00000000    
   5.00000000    
   4.00000000    
   3.00000000    
   4.00000000    
   2.00000000    
   3.00000000    
   7.00000000    
   4.00000000    
   8.00000000    
   3.00000000    
   2.00000000    
   2.00000000    
   1.00000000    
   3.00000000    
   0.00000000    
   2.00000000    
   1.00000000    
   3.00000000    
   3.00000000    
   8.00000000    
   1.00000000    
   0.00000000    
   0.00000000    
   5.00000000    
   5.00000000    
   5.00000000    
   2.00000000    
   1.00000000    
   7.00000000    
   4.00000000    
   1.00000000    
   5.00000000    
   4.00000000    
   1.00000000    
   1.00000000    
   2.00000000    
   1.00000000    
   0.00000000    
   1.00000000    
   2.00000000    
   1.00000000    
   2.00000000    
   3.00000000    
   1.00000000    
   1.00000000    
   0.00000000    
   0.00000000    
   4.00000000    
   1.00000000    
   1.00000000    
   4.00000000    
   0.00000000    
   3.00000000    
   4.00000000    
   2.00000000    
   2.00000000    
   0.00000000    
   1.00000000    
   4.00000000    
   2.00000000    
   2.00000000    
   3.00000000    
   6.00000000    
   5.00000000    
   5.00000000    
   7.00000000    
   0.00000000    
   4.00000000    
   5.00000000    
   2.00000000    
   7.00000000    
   4.00000000    
   2.00000000    
   6.00000000    
   3.00000000    
   2.00000000    
   3.00000000    
   3.00000000    
   2.00000000    
   2.00000000    
   4.00000000    
   3.00000000    
   4.00000000    
   4.00000000    
   1.00000000    
   4.00000000    
   1.00000000    
   2.00000000    
   7.00000000    
   1.00000000    
   3.00000000    
   6.00000000    
   1.00000000    
   3.00000000    
   3.00000000    
   2.00000000    
   4.00000000    
   6.00000000    
   2.00000000    
   3.00000000    
   3.00000000    
   2.00000000    
   3.00000000    
   4.00000000    
   2.00000000    
   2.00000000    
   2.00000000    
   2.00000000    
   0.00000000    
   1.00000000    
   0.00000000    
   3.00000000    
   1.00000000    
   2.00000000    
   5.00000000    
   6.00000000    
   3.00000000    
   0.00000000    
   0.00000000    
   2.00000000    
   1.00000000    
   3.00000000    
   2.00000000    
   6.00000000    
   10.0000000    
   2.00000000    
   5.00000000    
   4.00000000    
   1.00000000    
   4.00000000    
   7.00000000    
   2.00000000    
   2.00000000    
   3.00000000    
   1.00000000    
   5.00000000    
   2.00000000    
   6.00000000    
   3.00000000    
   1.00000000    
   6.00000000    
   3.00000000    
   3.00000000    
   2.00000000    
   2.00000000    
   5.00000000    
   5.00000000    
   4.00000000    
   2.00000000    
   3.00000000    
   5.00000000    
   5.00000000    
   2.00000000    
   3.00000000    
   1.00000000    
   2.00000000    
   2.00000000    
   2.00000000    
   5.00000000    
   4.00000000    
   3.00000000    
   5.00000000    
   2.00000000    
   4.00000000    
   1.00000000    
   2.00000000    
   2.00000000    
   1.00000000    
   1.00000000    
   1.00000000    
   2.00000000    
   4.00000000    
   2.00000000    
   1.00000000    
   1.00000000    
   1.00000000    
   1.00000000    
   0.00000000    
   3.00000000    
   5.00000000    
   2.00000000    
   2.00000000    
   2.00000000    
   0.00000000    
   4.00000000    
   4.00000000    
   7.00000000    
   2.00000000    
   7.00000000    
   5.00000000    
   5.00000000    
   1.00000000    
   10.0000000    
   1.00000000    
   3.00000000    
   5.00000000    
   8.00000000    
   4.00000000    
   5.00000000    
   3.00000000    
   4.00000000    
   2.00000000    
   6.00000000    
   2.00000000    
   5.00000000    
   2.00000000    
   4.00000000    
   3.00000000    
   5.00000000    
   4.00000000    
   4.00000000    
   4.00000000    
   1.00000000    
   4.00000000    
   4.00000000    
   3.00000000    
   4.00000000    
   3.00000000    
   1.00000000    
   1.00000000    
   1.00000000    
   5.00000000    
   0.00000000    
   3.00000000    
   3.00000000    
   0.00000000    
   4.00000000    
   3.00000000    
   2.00000000    
   0.00000000    
   2.00000000    
   0.00000000    
   3.00000000    
   3.00000000    
   3.00000000    
   3.00000000    
   3.00000000    
   1.00000000    
   3.00000000    
   0.00000000    
   4.00000000    
   2.00000000    
   2.00000000    
   0.00000000    
   3.00000000    
   3.00000000    
   1.00000000    
   0.00000000    
   3.00000000    
   2.00000000    
   7.00000000    
   0.00000000    
   2.00000000    
   4.00000000    
   7.00000000    
   4.00000000    
   1.00000000    
   2.00000000    
   4.00000000    
   7.00000000    
   5.00000000    
   5.00000000    
   3.00000000    
   2.00000000    
   4.00000000    
   5.00000000    
   4.00000000    
   2.00000000    
   3.00000000    
   7.00000000    
   2.00000000    
   2.00000000    
   0.00000000    
   1.00000000    
   1.00000000    
   2.00000000    
   4.00000000    
   1.00000000    
   0.00000000    
   6.00000000    
   4.00000000    
   2.00000000    
   2.00000000    
   2.00000000    
   3.00000000    
   2.00000000    
   2.00000000    
   0.00000000    
   4.00000000    
   4.00000000    
   3.00000000    
   6.00000000    
   2.00000000    
   2.00000000    
   0.00000000    
   2.00000000    
   3.00000000    
   2.00000000    
   0.00000000    
   3.00000000    
   1.00000000    
   1.00000000    
   2.00000000    
   1.00000000    
   4.00000000    
   3.00000000    
   4.00000000    
   6.00000000    
   1.00000000    
   7.00000000    
   1.00000000    
   1.00000000    
   5.00000000    
   4.00000000    
   3.00000000    
   0.00000000    
   0.00000000    
   3.00000000    
   0.00000000    
   7.00000000    
   3.00000000    
   4.00000000    
   8.00000000    
   6.00000000    
   3.00000000    
   5.00000000    
   5.00000000    
   8.00000000    
   4.00000000    
   2.00000000    
   0.00000000    
   5.00000000    
   2.00000000    
   4.00000000    
   4.00000000    
   5.00000000    
   3.00000000    
   4.00000000    
   3.00000000    
   2.00000000    
   4.00000000    
   4.00000000    
   3.00000000    
   3.00000000    
   4.00000000    
   3.00000000    
   3.00000000    
   2.00000000    
   2.00000000    
   0.00000000    
   2.00000000    
   3.00000000    
   3.00000000    
   1.00000000    
   0.00000000    
   3.00000000    
   1.00000000    
   3.00000000    
   1.00000000    
   1.00000000    
   2.00000000    
   2.00000000    
   2.00000000    
   2.00000000    
   1.00000000    
   1.00000000    
   0.00000000    
   1.00000000    
   1.00000000    
   0.00000000    
   0.00000000    
   2.00000000    
   0.00000000    
   1.00000000    
   4.00000000    
   0.00000000    
   3.00000000    
   3.00000000    
   6.00000000    
   2.00000000    
   4.00000000    
   4.00000000    
   4.00000000    
   2.00000000    
   5.00000000    
   7.00000000    
   6.00000000    
   6.00000000    
   6.00000000    
   2.00000000    
   8.00000000    
   3.00000000    
   6.00000000    
   2.00000000    
   2.00000000    
   0.00000000    
   7.00000000    
   2.00000000    
   2.00000000    
   0.00000000    
   4.00000000    
   2.00000000    
   5.00000000    
   3.00000000    
   1.00000000    
   2.00000000    
   3.00000000    
   3.00000000    
   4.00000000    
   2.00000000    
   1.00000000    
   4.00000000    
   1.00000000    
   1.00000000    
   3.00000000    
   1.00000000    
   3.00000000    
   2.00000000    
   0.00000000    
   1.00000000    
   4.00000000    
   3.00000000    
   2.00000000    
   1.00000000    
   0.00000000    
   1.00000000    
   3.00000000    
   0.00000000    
   3.00000000    
   3.00000000    
   3.00000000    
   1.00000000    
   0.00000000    
   2.00000000    
   2.00000000    
   2.00000000    
   3.00000000    
   2.00000000    
   0.00000000    
   3.00000000    
   1.00000000    
   5.00000000    
   4.00000000    
   12.0000000    
   4.00000000    
   2.00000000    
   5.00000000    
   2.00000000    
   8.00000000    
   5.00000000    
   3.00000000    
   6.00000000    
   0.00000000    
   3.00000000    
   5.00000000    
   4.00000000    
   4.00000000    
   6.00000000    
   3.00000000    
   4.00000000    
   4.00000000    
   4.00000000    
   1.00000000    
   3.00000000    
   2.00000000    
   4.00000000    
   0.00000000    
   3.00000000    
   1.00000000    
   3.00000000    
   4.00000000    
   3.00000000    
   3.00000000    
   2.00000000    
   2.00000000    
   2.00000000    
   3.00000000    
   2.00000000    
   1.00000000    
   4.00000000    
   3.00000000    
   2.00000000    
   6.00000000    
   1.00000000    
   6.00000000    
   2.00000000    
   2.00000000    
   4.00000000    
   2.00000000    
   2.00000000    
   1.00000000    
   2.00000000    
   0.00000000    
   0.00000000    
   1.00000000    
   0.00000000    
   2.00000000    
   1.00000000    
   1.00000000    
   3.00000000    
   2.00000000    
   4.00000000    
   2.00000000    
   1.00000000    
   5.00000000    
   3.00000000    
   3.00000000    
   6.00000000    
   3.00000000    
   3.00000000    
   2.00000000    
   3.00000000    
   4.00000000    
   5.00000000    
   5.00000000    
   2.00000000    
   3.00000000    
   0.00000000    
   4.00000000    
   4.00000000    
   4.00000000    
   3.00000000    
   4.00000000    
   3.00000000    
   2.00000000    
   1.00000000    
   4.00000000    
   2.00000000    
   3.00000000    
   3.00000000    
   3.00000000    
   4.00000000    
   3.00000000    
   5.00000000    
   2.00000000    
   3.00000000    
   7.00000000    
   7.00000000    
   2.00000000    
   3.00000000    
   2.00000000    
   0.00000000    
   4.00000000    
   4.00000000    
   2.00000000    
   6.00000000    
   1.00000000    
   1.00000000    
   1.00000000    
   4.00000000    
   2.00000000    
   1.00000000    
   1.00000000    
   2.00000000    
   2.00000000    
   1.00000000    
   2.00000000    
   3.00000000    
   2.00000000    
   2.00000000    
   2.00000000    
   1.00000000    
   2.00000000    
   4.00000000    
   3.00000000    
   4.00000000    
   0.00000000    
   1.00000000    
   4.00000000    
   5.00000000    
   3.00000000    
   0.00000000    
   3.00000000    
   7.00000000    
   7.00000000    
   1.00000000    
   5.00000000    
   3.00000000    
   5.00000000    
   8.00000000    
   5.00000000    
   4.00000000    
   0.00000000    
   2.00000000    
   6.00000000    
   3.00000000    
   7.00000000    
   5.00000000    
   2.00000000    
   4.00000000    
   1.00000000    
   5.00000000    
   1.00000000    
   4.00000000    
   2.00000000    
   4.00000000    
   5.00000000    
   7.00000000    
   4.00000000    
   5.00000000    
   4.00000000    
   1.00000000    
   5.00000000    
   4.00000000    
   3.00000000    
   1.00000000    
   4.00000000    
   2.00000000    
   1.00000000    
   4.00000000    
   2.00000000    
   4.00000000    
   2.00000000    
   1.00000000    
   2.00000000    
   2.00000000    
   2.00000000    
   1.00000000    
   0.00000000    
   4.00000000    
   7.00000000    
   3.00000000    
   2.00000000    
   5.00000000    
   3.00000000    
   3.00000000    
   1.00000000    
   3.00000000    
   1.00000000    
   1.00000000    
   2.00000000    
   3.00000000    
   3.00000000    
   2.00000000    
   4.00000000    
   2.00000000    
   3.00000000    
   4.00000000    
   4.00000000    
   5.00000000    
   3.00000000    
   2.00000000    
   8.00000000    
   3.00000000    
   4.00000000    
   4.00000000    
   2.00000000    
   0.00000000    
   3.00000000    
   6.00000000    
   1.00000000    
   1.00000000    
   1.00000000    
   4.00000000    
   3.00000000    
   2.00000000    
   4.00000000    
   1.00000000    
   2.00000000    
   3.00000000    
   5.00000000    
   3.00000000    
   6.00000000    
   12.0000000    
   8.00000000    
   4.00000000    
   2.00000000    
   4.00000000    
   3.00000000    
   2.00000000    
   3.00000000    
   6.00000000    
   2.00000000    
   2.00000000    
   2.00000000    
   3.00000000    
   6.00000000    
   3.00000000    
   3.00000000    
   1.00000000    
   1.00000000    
   2.00000000    
   3.00000000    
   2.00000000    
   1.00000000    
   0.00000000    
   0.00000000    
   4.00000000    
   0.00000000    
   1.00000000    
   1.00000000    
   0.00000000    
   0.00000000    
   4.00000000    
   1.00000000    
   0.00000000    
   4.00000000    
   2.00000000    
   2.00000000    
   2.00000000    
   2.00000000    
   8.00000000    
   2.00000000    
   2.00000000    
   4.00000000    
   4.00000000    
   4.00000000    
   6.00000000    
   4.00000000    
   4.00000000    
   6.00000000    
   3.00000000    
   4.00000000    
   4.00000000    
   2.00000000    
   2.00000000    
   3.00000000    
   6.00000000    
   3.00000000    
   2.00000000    
   4.00000000    
   3.00000000    
   6.00000000    
   3.00000000    
   5.00000000    
   1.00000000    
   5.00000000    
   6.00000000    
   5.00000000    
   7.00000000    
   6.00000000    
   3.00000000    
   1.00000000    
   6.00000000    
   3.00000000    
   2.00000000    
   3.00000000    
   2.00000000    
   4.00000000    
   7.00000000    
   2.00000000    
   2.00000000    
   4.00000000    
   2.00000000    
   0.00000000    
   1.00000000    
   2.00000000    
   4.00000000    
   0.00000000    
   1.00000000    
   3.00000000    
   1.00000000    
   3.00000000    
   0.00000000    
   1.00000000    
   3.00000000    
   3.00000000    
   2.00000000    
   1.00000000    
   0.00000000    
   4.00000000    
   4.00000000    
   2.00000000    
   4.00000000    
   1.00000000    
   3.00000000    
   6.00000000    
   6.00000000    
   2.00000000    
   5.00000000    
   2.00000000    
   2.00000000    
   6.00000000    
   3.00000000    
   3.00000000    
   6.00000000    
   4.00000000    
   0.00000000    
   3.00000000    
   1.00000000    
   7.00000000    
   0.00000000    
   1.00000000    
   1.00000000    
   2.00000000    
   3.00000000    
   1.00000000    
   3.00000000    
   4.00000000    
   4.00000000    
   8.00000000    
   5.00000000    
   4.00000000    
   1.00000000    
   3.00000000    
   1.00000000    
   0.00000000    
   2.00000000    
   0.00000000    
   0.00000000    
   0.00000000    
   2.00000000    
   4.00000000    
   3.00000000    
   3.00000000    
   4.00000000    
   1.00000000    
   3.00000000    
   2.00000000    
   2.00000000    
   1.00000000    
   4.00000000    
   3.00000000    
   1.00000000    
   4.00000000    
   4.00000000    
   2.00000000    
   3.00000000    
   1.00000000    
   3.00000000    
   1.00000000    
   4.00000000    
   1.00000000    
   1.00000000    
   3.00000000    
   2.00000000    
   0.00000000    
   2.00000000    
   8.00000000    
   2.00000000    
   3.00000000    
   3.00000000    
   6.00000000    
   4.00000000    
   0.00000000    
   2.00000000    
   3.00000000    
   4.00000000    
   7.00000000    
   1.00000000    
   2.00000000    
   3.00000000    
   0.00000000    
   4.00000000    
   3.00000000    
   6.00000000    
   8.00000000    
   3.00000000    
   5.00000000    
   4.00000000    
   2.00000000    
   3.00000000    
   4.00000000    
   1.00000000    
   6.00000000    
   3.00000000    
   2.00000000    
   3.00000000    
   3.00000000    
   3.00000000    
   1.00000000    
   2.00000000    
   0.00000000    
   4.00000000    
   1.00000000    
   4.00000000    
   4.00000000    
   1.00000000    
   2.00000000    
   1.00000000    
   3.00000000    
   4.00000000    
   4.00000000    
   1.00000000    
   0.00000000    
   1.00000000    
   1.00000000    
   4.00000000    
   1.00000000    
   3.00000000    
   2.00000000    
   1.00000000    
   4.00000000    
   2.00000000    
   0.00000000    
   2.00000000    
   0.00000000    
   0.00000000    
   3.00000000    
   1.00000000    
   4.00000000    
   0.00000000    
   5.00000000    
   2.00000000    
   2.00000000    
   1.00000000    
   2.00000000    
   2.00000000    
   5.00000000    
   0.00000000    
   4.00000000    
   3.00000000    
   5.00000000    
   1.00000000    
   2.00000000    
   1.00000000    
   4.00000000    
   0.00000000    
   2.00000000    
   1.00000000    
   2.00000000    
   0.00000000    
   4.00000000    
   3.00000000    
   2.00000000    
   2.00000000    
   2.00000000    
   7.00000000    
   3.00000000    
   4.00000000    
   4.00000000    
   3.00000000    
   6.00000000    
   4.00000000    
   3.00000000    
   2.00000000    
   3.00000000    
   2.00000000    
   1.00000000    
   2.00000000    
   3.00000000    
   2.00000000    
   1.00000000    
   0.00000000    
   1.00000000    
   1.00000000    
   0.00000000    
   2.00000000    
   1.00000000    
   2.00000000    
   1.00000000    
   2.00000000    
   1.00000000    
   4.00000000    
   0.00000000    
   4.00000000    
   1.00000000    
   4.00000000    
   1.00000000    
   1.00000000    
   1.00000000    
   2.00000000    
   2.00000000    
   4.00000000    
   2.00000000    
   4.00000000    
   2.00000000    
   1.00000000    
   3.00000000    
   6.00000000    
   5.00000000    
   3.00000000    
   2.00000000    
   7.00000000    
   4.00000000    
   2.00000000    
   2.00000000    
   1.00000000    
   3.00000000    
   7.00000000    
   3.00000000    
   2.00000000    
   4.00000000    
   2.00000000    
   6.00000000    
   0.00000000    
   2.00000000    
   2.00000000    
   4.00000000    
   6.00000000    
   1.00000000    
   8.00000000    
   2.00000000    
   6.00000000    
   4.00000000    
   3.00000000    
   1.00000000    
   3.00000000    
   4.00000000    
   4.00000000    
   3.00000000    
   0.00000000    
   4.00000000    
   0.00000000    
   4.00000000    
   3.00000000    
   4.00000000    
   1.00000000    
   4.00000000    
   4.00000000    
   1.00000000    
   0.00000000    
   1.00000000    
   4.00000000    
   5.00000000    
   3.00000000    
   5.00000000    
   1.00000000    
   7.00000000    
   0.00000000    
   1.00000000    
   1.00000000    
   0.00000000    
   2.00000000    
   0.00000000    
   2.00000000    
   2.00000000    
   3.00000000    
   1.00000000    
   2.00000000    
   2.00000000    
   3.00000000    
   3.00000000    
   3.00000000    
   2.00000000    
   7.00000000    
   4.00000000    
   2.00000000    
   4.00000000    
   1.00000000    
   4.00000000    
   4.00000000    
   6.00000000    
   0.00000000    
   6.00000000    
   1.00000000    
   2.00000000    
   4.00000000    
   6.00000000    
   1.00000000    
   2.00000000    
   1.00000000    
   3.00000000    
   3.00000000    
   2.00000000    
   3.00000000    
   2.00000000    
   4.00000000    
   5.00000000    
   1.00000000    
   3.00000000    
   0.00000000    
   5.00000000    
   4.00000000    
   0.00000000    
   1.00000000    
   6.00000000    
   3.00000000    
   3.00000000    
   3.00000000    
   2.00000000    
   3.00000000    
   2.00000000    
   2.00000000    
   0.00000000    
   0.00000000    
   3.00000000    
   2.00000000    
   4.00000000    
   0.00000000    
   2.00000000    
   3.00000000    
   4.00000000    
   9.00000000    
   2.00000000    
   3.00000000    
   2.00000000    
   0.00000000    
   0.00000000    
   0.00000000    
   2.00000000    
   2.00000000    
   2.00000000    
   6.00000000    
   1.00000000    
   0.00000000    
   2.00000000    
   3.00000000    
   4.00000000    
   2.00000000    
   4.00000000    
   2.00000000    
   1.00000000    
   4.00000000    
   1.00000000    
   3.00000000    
   3.00000000    
   1.00000000    
   8.00000000    
   2.00000000    
   6.00000000    
   6.00000000    
   0.00000000    
   1.00000000    
   6.00000000    
   2.00000000    
   5.00000000    
   7.00000000    
   2.00000000    
   6.00000000    
   4.00000000    
   2.00000000    
   10.0000000    
   2.00000000    
   4.00000000    
   5.00000000    
   5.00000000    
   1.00000000    
   3.00000000    
   4.00000000    
   4.00000000    
   3.00000000    
   3.00000000    
   3.00000000    
   0.00000000    
   1.00000000    
   0.00000000    
   0.00000000    
   3.00000000    
   1.00000000    
   4.00000000    
   2.00000000    
   2.00000000    
   2.00000000    
   5.00000000    
   3.00000000    
   4.00000000    
   5.00000000    
   3.00000000    
   0.00000000    
   2.00000000    
   0.00000000    
   2.00000000    
   1.00000000    
   5.00000000    
   4.00000000    
   4.00000000    
   4.00000000    
   3.00000000    
   2.00000000    
   2.00000000    
   2.00000000    
   3.00000000    
   2.00000000    
   5.00000000    
   0.00000000    
   3.00000000    
   2.00000000    
   5.00000000    
   2.00000000    
   2.00000000    
   1.00000000    
   3.00000000    
   0.00000000    
   0.00000000    
   1.00000000    
   1.00000000    
   4.00000000    
   5.00000000    
   5.00000000    
   8.00000000    
   5.00000000    
   0.00000000    
   2.00000000    
   3.00000000    
   2.00000000    
   2.00000000    
   4.00000000    
   4.00000000    
   4.00000000    
   2.00000000    
   0.00000000    
   3.00000000    
   0.00000000    
   5.00000000    
   4.00000000    
   4.00000000    
   2.00000000    
   3.00000000    
   2.00000000    
   1.00000000    
   4.00000000    
   2.00000000    
   4.00000000    
   6.00000000    
   1.00000000    
   3.00000000    
   4.00000000    
   4.00000000    
   5.00000000    
   3.00000000    
   3.00000000    
   1.00000000    
   3.00000000    
   4.00000000    
   0.00000000    
   0.00000000    
   0.00000000    
   1.00000000    
   2.00000000    
   3.00000000    
   2.00000000    
   2.00000000    
   1.00000000    
   4.00000000    
   2.00000000    
   5.00000000    
   0.00000000    
   3.00000000    
   4.00000000    
   2.00000000    
   3.00000000    
   1.00000000    
   4.00000000    
   4.00000000    
   2.00000000    
   5.00000000    
   4.00000000    
   2.00000000    
   2.00000000    
   6.00000000    
   5.00000000    
   4.00000000    
   3.00000000    
   1.00000000    
   4.00000000    
   4.00000000    
   6.00000000    
   5.00000000    
   1.00000000    
   0.00000000    
   6.00000000    
   6.00000000    
   6.00000000    
   3.00000000    
   1.00000000    
   3.00000000    
   7.00000000    
   4.00000000    
   3.00000000    
   3.00000000    
   2.00000000    
   5.00000000    
   0.00000000    
   1.00000000    
   2.00000000    
   1.00000000    
   4.00000000    
   3.00000000    
   1.00000000    
   2.00000000    
   3.00000000    
   1.00000000    
   3.00000000    
   4.00000000    
   2.00000000    
   1.00000000    
   3.00000000    
   2.00000000    
   1.00000000    
   1.00000000    
   2.00000000    
   1.00000000    
   5.00000000    
   5.00000000    
   6.00000000    
   1.00000000    
   3.00000000    
   3.00000000    
   5.00000000    
   4.00000000    
   1.00000000    
   4.00000000    
   2.00000000    
   4.00000000    
   3.00000000    
   4.00000000    
   1.00000000    
   3.00000000    
   3.00000000    
   4.00000000    
   3.00000000    
   2.00000000    
   1.00000000    
   2.00000000    
   5.00000000    
   3.00000000    
   2.00000000    
   7.00000000    
   5.00000000    
   5.00000000    
   4.00000000    
   2.00000000    
   4.00000000    
   1.00000000    
   3.00000000    
   3.00000000    
   1.00000000    
   2.00000000    
   3.00000000    
   1.00000000    
   1.00000000    
   2.00000000    
   1.00000000    
   1.00000000    
   2.00000000    
   3.00000000    
   1.00000000    
   1.00000000    
   1.00000000    
   0.00000000    
   0.00000000    
   4.00000000    
   3.00000000    
   1.00000000    
   2.00000000    
   2.00000000    
   3.00000000    
   3.00000000    
   4.00000000    
   2.00000000    
   1.00000000    
   1.00000000    
   0.00000000    
   1.00000000    
   0.00000000    
   2.00000000    
   2.00000000    
   2.00000000    
   0.00000000    
   1.00000000    
   3.00000000    
   4.00000000    
   5.00000000    
   4.00000000    
   1.00000000    
   3.00000000    
   5.00000000    
   0.00000000    
   3.00000000    
   2.00000000    
   2.00000000    
   6.00000000    
   1.00000000    
   2.00000000    
   2.00000000    
   4.00000000    
   3.00000000    
   5.00000000    
   8.00000000    
   1.00000000    
   7.00000000    
   6.00000000    
   3.00000000    
   1.00000000    
   5.00000000    
   3.00000000    
   5.00000000    
   4.00000000    
   2.00000000    
   4.00000000    
   4.00000000    
   1.00000000    
   1.00000000    
   4.00000000    
   1.00000000    
   4.00000000    
   5.00000000    
   4.00000000    
   0.00000000    
   2.00000000    
   1.00000000    
   4.00000000    
   3.00000000    
   3.00000000    
   2.00000000    
   0.00000000    
   1.00000000    
   3.00000000    
   0.00000000    
   5.00000000    
   4.00000000    
   5.00000000    
   1.00000000    
   1.00000000    
   2.00000000    
   1.00000000    
   1.00000000    
   1.00000000    
   1.00000000    
   2.00000000    
   0.00000000    
   2.00000000    
   0.00000000    
   6.00000000    
   8.00000000    
   4.00000000    
   4.00000000    
   4.00000000    
   2.00000000    
   2.00000000    
   3.00000000    
   3.00000000    
   4.00000000    
   4.00000000    
   3.00000000    
   3.00000000    
   3.00000000    
   3.00000000    
   2.00000000    
   6.00000000    
   3.00000000    
   7.00000000    
   5.00000000    
   4.00000000    
   5.00000000    
   3.00000000    
   6.00000000    
   3.00000000    
   2.00000000    
   2.00000000    
   2.00000000    
   3.00000000    
   4.00000000    
   3.00000000    
   2.00000000    
   2.00000000    
   5.00000000    
   3.00000000    
   3.00000000    
   3.00000000    
   1.00000000    
   2.00000000    
   3.00000000    
   2.00000000    
   5.00000000    
   4.00000000    
   5.00000000    
   3.00000000    
   1.00000000    
   1.00000000    
   2.00000000    
   4.00000000    
   2.00000000    
   2.00000000    
   4.00000000    
   1.00000000    
   2.00000000    
   2.00000000    
   2.00000000    
   1.00000000    
   0.00000000    
   2.00000000    
   1.00000000    
   3.00000000    
   2.00000000    
   4.00000000    
   0.00000000    
   2.00000000    
   1.00000000    
   1.00000000    
   2.00000000    
   1.00000000    
   4.00000000    
   4.00000000    
   1.00000000    
   1.00000000    
   3.00000000    
   5.00000000    
   5.00000000    
   5.00000000    
   4.00000000    
   4.00000000    
   2.00000000    
   1.00000000    
   2.00000000    
   2.00000000    
   0.00000000    
   4.00000000    
   5.00000000    
   1.00000000    
   3.00000000    
   0.00000000    
   2.00000000    
   3.00000000    
   0.00000000    
   4.00000000    
   7.00000000    
   3.00000000    
   2.00000000    
   4.00000000    
   3.00000000    
   2.00000000    
   1.00000000    
   2.00000000    
   2.00000000    
   5.00000000    
   4.00000000    
   2.00000000    
   3.00000000    
   4.00000000    
   0.00000000    
   2.00000000    
   5.00000000    
   6.00000000    
   1.00000000    
   0.00000000    
   2.00000000    
   1.00000000    
   2.00000000    
   2.00000000    
   1.00000000    
   2.00000000    
   3.00000000    
   1.00000000    
   1.00000000    
   0.00000000    
   0.00000000    
   3.00000000    
   1.00000000    
   6.00000000    
   2.00000000    
   2.00000000    
   0.00000000    
   4.00000000    
   3.00000000    
   4.00000000    
   1.00000000    
   4.00000000    
   2.00000000    
   3.00000000    
   5.00000000    
   7.00000000    
   3.00000000    
   1.00000000    
   4.00000000    
   1.00000000    
   7.00000000    
   8.00000000    
   3.00000000    
   6.00000000    
   2.00000000    
   6.00000000    
   4.00000000    
   5.00000000    
   2.00000000    
   2.00000000    
   2.00000000    
   0.00000000    
   6.00000000    
   7.00000000    
   1.00000000    
   2.00000000    
   2.00000000    
   3.00000000    
   3.00000000    
   6.00000000    
   2.00000000    
   5.00000000    
   1.00000000    
   2.00000000    
   1.00000000    
   0.00000000    
   1.00000000    
   4.00000000    
   3.00000000    
   2.00000000    
   3.00000000    
   3.00000000    
   4.00000000    
   1.00000000    
   3.00000000    
   2.00000000    
   2.00000000    
   2.00000000    
   3.00000000    
   2.00000000    
   1.00000000    
   1.00000000    
   1.00000000    
   1.00000000    
   2.00000000    
   1.00000000    
   2.00000000    
   2.00000000    
   6.00000000    
   1.00000000    
   0.00000000    
   1.00000000    
   5.00000000    
   4.00000000    
   0.00000000    
   3.00000000    
   3.00000000    
   4.00000000    
   2.00000000    
   4.00000000    
   6.00000000    
   5.00000000    
   8.00000000    
   6.00000000    
   3.00000000    
   2.00000000    
   2.00000000    
   4.00000000    
   3.00000000    
   5.00000000    
   2.00000000    
   3.00000000    
   2.00000000    
   3.00000000    
   0.00000000    
   0.00000000    
   6.00000000    
   1.00000000    
   4.00000000    
   1.00000000    
   2.00000000    
   1.00000000    
   1.00000000    
   1.00000000    
   1.00000000    
   2.00000000    
   1.00000000    
   6.00000000    
   0.00000000    
   3.00000000    
   3.00000000    
   2.00000000    
   5.00000000    
   1.00000000    
   4.00000000    
   1.00000000    
   4.00000000    
   1.00000000    
   1.00000000    
   1.00000000    
   4.00000000    
   1.00000000    
   0.00000000    
   0.00000000    
   0.00000000    
   2.00000000    
   0.00000000    
   2.00000000    
   4.00000000    
   2.00000000    
   3.00000000    
   1.00000000    
   8.00000000    
   5.00000000    
   5.00000000    
   2.00000000    
   5.00000000    
   3.00000000    
   6.00000000    
   3.00000000    
   3.00000000    
   3.00000000    
   3.00000000    
   5.00000000    
   12.0000000    
   6.00000000    
   5.00000000    
   3.00000000    
   4.00000000    
   6.00000000    
   4.00000000    
   2.00000000    
   2.00000000    
   1.00000000    
   4.00000000    
   5.00000000    
   2.00000000    
   0.00000000    
   6.00000000    
   6.00000000    
   2.00000000    
   6.00000000    
   5.00000000    
   4.00000000    
   0.00000000    
   1.00000000    
   0.00000000    
   2.00000000    
   4.00000000    
   3.00000000    
   1.00000000    
   2.00000000    
   1.00000000    
   1.00000000    
   4.00000000    
   2.00000000    
   3.00000000    
   3.00000000    
   6.00000000    
   2.00000000    
   2.00000000    
   4.00000000    
   5.00000000    
   3.00000000    
   4.00000000    
   3.00000000    
   3.00000000    
   0.00000000    
   0.00000000    
   0.00000000    
   0.00000000    
   0.00000000    
   1.00000000    
   1.00000000    
   1.00000000    
   5.00000000    
   0.00000000    
   4.00000000    
   5.00000000    
   7.00000000    
   2.00000000    
   4.00000000    
   4.00000000    
   4.00000000    
   4.00000000    
   3.00000000    
   7.00000000    
   4.00000000    
   8.00000000    
   5.00000000    
   4.00000000    
   2.00000000    
   4.00000000    
   4.00000000    
   5.00000000    
   10.0000000    
   2.00000000    
   0.00000000    
   1.00000000    
   4.00000000    
   3.00000000    
   4.00000000    
   7.00000000    
   1.00000000    
   6.00000000    
   4.00000000    
   4.00000000    
   1.00000000    
   3.00000000    
   5.00000000    
   4.00000000    
   2.00000000    
   0.00000000    
   2.00000000    
   1.00000000    
   0.00000000    
   0.00000000    
   5.00000000    
   2.00000000    
   1.00000000    
   8.00000000    
   6.00000000    
   1.00000000    
   0.00000000    
   2.00000000    
   0.00000000    
   0.00000000    
   1.00000000    
   2.00000000    
   1.00000000    
   0.00000000    
   3.00000000    
   0.00000000    
   5.00000000    
   1.00000000    
   1.00000000    
   1.00000000    
   1.00000000    
   1.00000000    
   2.00000000    
   0.00000000    
   3.00000000    
   5.00000000    
   1.00000000    
   3.00000000    
   3.00000000    
   2.00000000    
   3.00000000    
   2.00000000    
   2.00000000    
   7.00000000    
   1.00000000    
   4.00000000    
   7.00000000    
   1.00000000    
   3.00000000    
   3.00000000    
   3.00000000    
   1.00000000    
   2.00000000    
   4.00000000    
   6.00000000    
   3.00000000    
   2.00000000    
   4.00000000    
   7.00000000    
   1.00000000    
   4.00000000    
   5.00000000    
   4.00000000    
   0.00000000    
   0.00000000    
   4.00000000    
   2.00000000    
   1.00000000    
   1.00000000    
   4.00000000    
   5.00000000    
   3.00000000    
   2.00000000    
   2.00000000    
   4.00000000    
   0.00000000    
   3.00000000    
   5.00000000    
   2.00000000    
   1.00000000    
   1.00000000    
   2.00000000    
   1.00000000    
   1.00000000    
   2.00000000    
   4.00000000    
   3.00000000    
   0.00000000    
   4.00000000    
   1.00000000    
   0.00000000    
   0.00000000    
   1.00000000    
   1.00000000    
   2.00000000    
   3.00000000    
   4.00000000    
   0.00000000    
   0.00000000    
   2.00000000    
   3.00000000    
   1.00000000    
   1.00000000    
   2.00000000    
   3.00000000    
   1.00000000    
   2.00000000    
   2.00000000    
   5.00000000    
   2.00000000    
   6.00000000    
   3.00000000    
   3.00000000    
   6.00000000    
   1.00000000    
   3.00000000    
   4.00000000    
   4.00000000    
   6.00000000    
   3.00000000    
   4.00000000    
   3.00000000    
   3.00000000    
   2.00000000    
   1.00000000    
   4.00000000    
   1.00000000    
   0.00000000    
   2.00000000    
   0.00000000    
   2.00000000    
   3.00000000    
   1.00000000    
   0.00000000    
   2.00000000    
   1.00000000    
   0.00000000    
   1.00000000    
   2.00000000    
   0.00000000    
   1.00000000    
   3.00000000    
   3.00000000    
   2.00000000    
   4.00000000    
   3.00000000    
   2.00000000    
   2.00000000    
   1.00000000    
   0.00000000    
   1.00000000    
   2.00000000    
   1.00000000    
   1.00000000    
   2.00000000    
   0.00000000    
   1.00000000    
   1.00000000    
   0.00000000    
   0.00000000    
   2.00000000    
   2.00000000    
   3.00000000    
   1.00000000    
   6.00000000    
   2.00000000    
   1.00000000    
   2.00000000    
   2.00000000    
   4.00000000    
   2.00000000    
   3.00000000    
   4.00000000    
   4.00000000    
   3.00000000    
   1.00000000    
   3.00000000    
   4.00000000    
   3.00000000    
   0.00000000    
   5.00000000    
   4.00000000    
   6.00000000    
   1.00000000    
   4.00000000    
   2.00000000    
   2.00000000    
   2.00000000    
   2.00000000    
   0.00000000    
   3.00000000    
   4.00000000    
   0.00000000    
   0.00000000    
   1.00000000    
   0.00000000    
   3.00000000    
   2.00000000    
   2.00000000    
   2.00000000    
   1.00000000    
   1.00000000    
   0.00000000    
   4.00000000    
   0.00000000    
   1.00000000    
   2.00000000    
   2.00000000    
   1.00000000    
   1.00000000    
   4.00000000    
   0.00000000    
   1.00000000    
   3.00000000    
   3.00000000    
   1.00000000    
   2.00000000    
   0.00000000    
   1.00000000    
   2.00000000    
   1.00000000    
   1.00000000    
   0.00000000    
   2.00000000    
   2.00000000    
   2.00000000    
   3.00000000    
   7.00000000    
   1.00000000    
   2.00000000    
   1.00000000    
   3.00000000    
   2.00000000    
   1.00000000    
   3.00000000    
   2.00000000    
   3.00000000    
   3.00000000    
   1.00000000    
   0.00000000    
   1.00000000    
   3.00000000    
   4.00000000    
   5.00000000    
   5.00000000    
   2.00000000    
   3.00000000    
   2.00000000    
   1.00000000    
   2.00000000    
   4.00000000    
   3.00000000    
   1.00000000    
   1.00000000    
   5.00000000    
   2.00000000    
   2.00000000    
   1.00000000    
   0.00000000    
   1.00000000    
   2.00000000    
   1.00000000    
   1.00000000    
   3.00000000    
   0.00000000    
   0.00000000    
   2.00000000    
   4.00000000    
   2.00000000    
   3.00000000    
   3.00000000    
   2.00000000    
   1.00000000    
   1.00000000    
   0.00000000    
   1.00000000    
   3.00000000    
   1.00000000    
   0.00000000    
   1.00000000    
   1.00000000    
   1.00000000    
   1.00000000    
   1.00000000    
   0.00000000    
   1.00000000    
   1.00000000    
   4.00000000    
   3.00000000    
   4.00000000    
   3.00000000    
   4.00000000    
   3.00000000    
   2.00000000    
   5.00000000    
   2.00000000    
   0.00000000    
   1.00000000    
   2.00000000    
   0.00000000    
   1.00000000    
   2.00000000    
   6.00000000    
   2.00000000    
   2.00000000    
   2.00000000    
   4.00000000    
   4.00000000    
   1.00000000    
   0.00000000    
   1.00000000    
   3.00000000    
   1.00000000    
   5.00000000    
   3.00000000    
   3.00000000    
   1.00000000    
   0.00000000    
   4.00000000    
   1.00000000    
   3.00000000    
   0.00000000    
   1.00000000    
   2.00000000    
   3.00000000    
   1.00000000    
   1.00000000    
   1.00000000    
   1.00000000    
   0.00000000    
   4.00000000    
   1.00000000    
   2.00000000    
   1.00000000    
   3.00000000    
   0.00000000    
   1.00000000    
   1.00000000    
   2.00000000    
   1.00000000    
   3.00000000    
   3.00000000    
   1.00000000    
   1.00000000    
   1.00000000    
   2.00000000    
   0.00000000    
   1.00000000    
   1.00000000    
   1.00000000    
   1.00000000    
   6.00000000    
   3.00000000    
   6.00000000    
   5.00000000    
   1.00000000    
   3.00000000    
   5.00000000    
   0.00000000    
   2.00000000    
   2.00000000    
   3.00000000    
   1.00000000    
   4.00000000    
   4.00000000    
   3.00000000    
   3.00000000    
   0.00000000    
   0.00000000    
   3.00000000    
   3.00000000    
   0.00000000    
   3.00000000    
   3.00000000    
   3.00000000    
   1.00000000    
   4.00000000    
   3.00000000    
   2.00000000    
   6.00000000    
   1.00000000    
   2.00000000    
   2.00000000    
   1.00000000    
   1.00000000    
   3.00000000    
   2.00000000    
   3.00000000    
   0.00000000    
   3.00000000    
   1.00000000    
   2.00000000    
   1.00000000    
   1.00000000    
   2.00000000    
   1.00000000    
   2.00000000    
   2.00000000    
   4.00000000    
   0.00000000    
   0.00000000    
   1.00000000    
   2.00000000    
   1.00000000    
   2.00000000    
   3.00000000    
   1.00000000    
   2.00000000    
   1.00000000    
   1.00000000    
   1.00000000    
   1.00000000    
   0.00000000    
   1.00000000    
   4.00000000    
   0.00000000    
   1.00000000    
   2.00000000    
   7.00000000    
   5.00000000    
   2.00000000    
   4.00000000    
   3.00000000    
   0.00000000    
   3.00000000    
   1.00000000    
   4.00000000    
   4.00000000    
   2.00000000    
   6.00000000    
   2.00000000    
   0.00000000    
   4.00000000    
   2.00000000    
   0.00000000    
   1.00000000    
   4.00000000    
   0.00000000    
   7.00000000    
   1.00000000    
   1.00000000    
   3.00000000    
   1.00000000    
   2.00000000    
   1.00000000    
   4.00000000    
   0.00000000    
   4.00000000    
   0.00000000    
   2.00000000    
   1.00000000    
   1.00000000    
   3.00000000    
   0.00000000    
   5.00000000    
   1.00000000    
   0.00000000    
   4.00000000    
   2.00000000    
   2.00000000    
   0.00000000    
   2.00000000    
   1.00000000    
   0.00000000    
   0.00000000    
   1.00000000    
   4.00000000    
   2.00000000    
   1.00000000    
   4.00000000    
   1.00000000    
   2.00000000    
   0.00000000    
   5.00000000    
   0.00000000    
   0.00000000    
   2.00000000    
   0.00000000    
   0.00000000    
   1.00000000    
   3.00000000    
   2.00000000    
   4.00000000    
   4.00000000    
   4.00000000    
   3.00000000    
   3.00000000    
   4.00000000    
   3.00000000    
   3.00000000    
   3.00000000    
   2.00000000    
   1.00000000    
   2.00000000    
   3.00000000    
   0.00000000    
   1.00000000    
   1.00000000    
   4.00000000    
   6.00000000    
   4.00000000    
   5.00000000    
   4.00000000    
   2.00000000    
   4.00000000    
   3.00000000    
   2.00000000    
   5.00000000    
   2.00000000    
   3.00000000    
   2.00000000    
   5.00000000    
   2.00000000    
   2.00000000    
   1.00000000    
   1.00000000    
   1.00000000    
   5.00000000    
   0.00000000    
   0.00000000    
   2.00000000    
   2.00000000    
   2.00000000    
   2.00000000    
   0.00000000    
   3.00000000    
   3.00000000    
   4.00000000    
   0.00000000    
   1.00000000    
   2.00000000    
   0.00000000    
   0.00000000    
   4.00000000    
   1.00000000    
   3.00000000    
   1.00000000    
   1.00000000    
   1.00000000    
   0.00000000    
   0.00000000    
   2.00000000    
   0.00000000    
   1.00000000    
   1.00000000    
   4.00000000    
   2.00000000    
   1.00000000    
   6.00000000    
   5.00000000    
   0.00000000    
   4.00000000    
   1.00000000    
   2.00000000    
   2.00000000    
   6.00000000    
   4.00000000    
   2.00000000    
   2.00000000    
   2.00000000    
   4.00000000    
   2.00000000    
   0.00000000    
   3.00000000    
   3.00000000    
   4.00000000    
   3.00000000    
   1.00000000    
   5.00000000    
   1.00000000    
   2.00000000    
   1.00000000    
   1.00000000    
   1.00000000    
   1.00000000    
   3.00000000    
   1.00000000    
   2.00000000    
   3.00000000    
   1.00000000    
   2.00000000    
   1.00000000    
   0.00000000    
   0.00000000    
   1.00000000    
   1.00000000    
   2.00000000    
   2.00000000    
   1.00000000    
   4.00000000    
   2.00000000    
   2.00000000    
   4.00000000    
   0.00000000    
   2.00000000    
   1.00000000    
   1.00000000    
   3.00000000    
   1.00000000    
   2.00000000    
   1.00000000    
   3.00000000    
   4.00000000    
   5.00000000    
   2.00000000    
   0.00000000    
   1.00000000    
   2.00000000    
   4.00000000    
   4.00000000    
   4.00000000    
   1.00000000    
   2.00000000    
   2.00000000    
   4.00000000    
   3.00000000    
   0.00000000    
   0.00000000    
   6.00000000    
   1.00000000    
   2.00000000    
   2.00000000    
   4.00000000    
   4.00000000    
   4.00000000    
   3.00000000    
   4.00000000    
   3.00000000    
   3.00000000    
   4.00000000    
   3.00000000    
   1.00000000    
   4.00000000    
   2.00000000    
   5.00000000    
   2.00000000    
   6.00000000    
   2.00000000    
   0.00000000    
   2.00000000    
   0.00000000    
   1.00000000    
   0.00000000    
   1.00000000    
   1.00000000    
   0.00000000    
   2.00000000    
   1.00000000    
   0.00000000    
   3.00000000    
   2.00000000    
   0.00000000    
   0.00000000    
   2.00000000    
   3.00000000    
   1.00000000    
   5.00000000    
   3.00000000    
   1.00000000    
   2.00000000    
   2.00000000    
   2.00000000    
   1.00000000    
   3.00000000    
   0.00000000    
   0.00000000    
   2.00000000    
   2.00000000    
   0.00000000    
   2.00000000    
   3.00000000    
   2.00000000    
   3.00000000    
   4.00000000    
   2.00000000    
   2.00000000    
   3.00000000    
   4.00000000    
   3.00000000    
   6.00000000    
   3.00000000    
   1.00000000    
   1.00000000    
   1.00000000    
   4.00000000    
   3.00000000    
   7.00000000    
   3.00000000    
   1.00000000    
   2.00000000    
   3.00000000    
   3.00000000    
   3.00000000    
   2.00000000    
   2.00000000    
   2.00000000    
   0.00000000    
   3.00000000    
   4.00000000    
   1.00000000    
   0.00000000    
   1.00000000    
   0.00000000    
   2.00000000    
   1.00000000    
   1.00000000    
   0.00000000    
   0.00000000    
   1.00000000    
   4.00000000    
   2.00000000    
   1.00000000    
   3.00000000    
   2.00000000    
   1.00000000    
   0.00000000    
   1.00000000    
   1.00000000    
   1.00000000    
   2.00000000    
   2.00000000    
   3.00000000    
   0.00000000    
   0.00000000    
   1.00000000    
   1.00000000    
   3.00000000    
   1.00000000    
   3.00000000    
   2.00000000    
   1.00000000    
   0.00000000    
   1.00000000    
   3.00000000    
   0.00000000    
   1.00000000    
   2.00000000    
   0.00000000    
   3.00000000    
   1.00000000    
   3.00000000    
   1.00000000    
   2.00000000    
   2.00000000    
   1.00000000    
   4.00000000    
   6.00000000    
   1.00000000    
   2.00000000    
   6.00000000    
   2.00000000    
   3.00000000    
   2.00000000    
   1.00000000    
   4.00000000    
   2.00000000    
   0.00000000    
   3.00000000    
   5.00000000    
   3.00000000    
   2.00000000    
   2.00000000    
   2.00000000    
   0.00000000    
   3.00000000    
   1.00000000    
   5.00000000    
   4.00000000    
   2.00000000    
   0.00000000    
   2.00000000    
   4.00000000    
   2.00000000    
   2.00000000    
   2.00000000    
   2.00000000    
   2.00000000    
   1.00000000    
   0.00000000    
   1.00000000    
   1.00000000    
   1.00000000    
   2.00000000    
   1.00000000    
   0.00000000    
   2.00000000    
   3.00000000    
   1.00000000    
   2.00000000    
   0.00000000    
   4.00000000    
   0.00000000    
   2.00000000    
   0.00000000    
   3.00000000    
   2.00000000    
   2.00000000    
   1.00000000    
   2.00000000    
   1.00000000    
   2.00000000    
   4.00000000    
   1.00000000    
   0.00000000    
   2.00000000    
   2.00000000    
   0.00000000    
   2.00000000    
   3.00000000    
   3.00000000    
   2.00000000    
   4.00000000    
   1.00000000    
   3.00000000    
   2.00000000    
   4.00000000    
   1.00000000    
   0.00000000    
   1.00000000    
   3.00000000    
   1.00000000    
   2.00000000    
   0.00000000    
   1.00000000    
   1.00000000    
   5.00000000    
   3.00000000    
   1.00000000    
   3.00000000    
   4.00000000    
   2.00000000    
   0.00000000    
   0.00000000    
   4.00000000    
   4.00000000    
   1.00000000    
   1.00000000    
   2.00000000    
   2.00000000    
   2.00000000    
   0.00000000    
   0.00000000    
   1.00000000    
   2.00000000    
   2.00000000    
   2.00000000    
   4.00000000    
   2.00000000    
   2.00000000    
   4.00000000    
   1.00000000    
   1.00000000    
   1.00000000    
   1.00000000    
   1.00000000    
   1.00000000    
   0.00000000    
   1.00000000    
   1.00000000    
   0.00000000    
   2.00000000    
   1.00000000    
   1.00000000    
   1.00000000    
   0.00000000    
   2.00000000    
   5.00000000    
   1.00000000    
   3.00000000    
   2.00000000    
   2.00000000    
   0.00000000    
   1.00000000    
   2.00000000    
   2.00000000    
   2.00000000    
   2.00000000    
   3.00000000    
   4.00000000    
   1.00000000    
   3.00000000    
   1.00000000    
   4.00000000    
   2.00000000    
   0.00000000    
   1.00000000    
   1.00000000    
   1.00000000    
   4.00000000    
   4.00000000    
   4.00000000    
   4.00000000    
   2.00000000    
   2.00000000    
   1.00000000    
   3.00000000    
   1.00000000    
   0.00000000    
   2.00000000    
   2.00000000    
   2.00000000    
   0.00000000    
   0.00000000    
   1.00000000    
   0.00000000    
   1.00000000    
   1.00000000    
   2.00000000    
   2.00000000    
   1.00000000    
   2.00000000    
   1.00000000    
   1.00000000    
   1.00000000    
   2.00000000    
   1.00000000    
   0.00000000    
   2.00000000    
   2.00000000    
   2.00000000    
   1.00000000    
   1.00000000    
   0.00000000    
   3.00000000    
   4.00000000    
   0.00000000    
   2.00000000    
   0.00000000    
   3.00000000    
   0.00000000    
   4.00000000    
   2.00000000    
   4.00000000    
   1.00000000    
   0.00000000    
   2.00000000    
   1.00000000    
   1.00000000    
   4.00000000    
   1.00000000    
   2.00000000    
   1.00000000    
   2.00000000    
   3.00000000    
   4.00000000    
   1.00000000    
   4.00000000    
   2.00000000    
   0.00000000    
   4.00000000    
   2.00000000    
   1.00000000    
   3.00000000    
   5.00000000    
   0.00000000    
   3.00000000    
   5.00000000    
   3.00000000    
   8.00000000    
   5.00000000    
   3.00000000    
   1.00000000    
   3.00000000    
   1.00000000    
   2.00000000    
   2.00000000    
   3.00000000    
   4.00000000    
   2.00000000    
   1.00000000    
   1.00000000    
   2.00000000    
   1.00000000    
   2.00000000    
   5.00000000    
   0.00000000    
   2.00000000    
   3.00000000    
   3.00000000    
   1.00000000    
   2.00000000    
   1.00000000    
   1.00000000    
   2.00000000    
   2.00000000    
   3.00000000    
   0.00000000    
   4.00000000    
   0.00000000    
   0.00000000    
   0.00000000    
   1.00000000    
   1.00000000    
   2.00000000    
   2.00000000    
   1.00000000    
   2.00000000    
   1.00000000    
   3.00000000    
   3.00000000    
   2.00000000    
   0.00000000    
   2.00000000    
   1.00000000    
   2.00000000    
   1.00000000    
   0.00000000    
   2.00000000    
   4.00000000    
   0.00000000    
   1.00000000    
   0.00000000    
   3.00000000    
   2.00000000    
   1.00000000    
   0.00000000    
   3.00000000    
   3.00000000    
   2.00000000    
   2.00000000    
   1.00000000    
   3.00000000    
   6.00000000    
   2.00000000    
   3.00000000    
   2.00000000    
   3.00000000    
   3.00000000    
   4.00000000    
   1.00000000    
   3.00000000    
   2.00000000    
   3.00000000    
   1.00000000    
   2.00000000    
   4.00000000    
   2.00000000    
   5.00000000    
   0.00000000    
   2.00000000    
   3.00000000    
   3.00000000    
   6.00000000    
   2.00000000    
   2.00000000    
   2.00000000    
   4.00000000    
   2.00000000    
   2.00000000    
   0.00000000    
   0.00000000    
   2.00000000    
   0.00000000    
   2.00000000    
   3.00000000    
   3.00000000    
   2.00000000    
   0.00000000    
   3.00000000    
   2.00000000    
   2.00000000    
   1.00000000    
   3.00000000    
   2.00000000    
   2.00000000    
   1.00000000    
   2.00000000    
   2.00000000    
   1.00000000    
   2.00000000    
   1.00000000    
   2.00000000    
   1.00000000    
   2.00000000    
   0.00000000    
   0.00000000    
   1.00000000    
   4.00000000    
   4.00000000    
   0.00000000    
   2.00000000    
   1.00000000    
   5.00000000    
   3.00000000    
   4.00000000    
   6.00000000    
   1.00000000    
   1.00000000    
   2.00000000    
   2.00000000    
   2.00000000    
   0.00000000    
   0.00000000    
   0.00000000    
   4.00000000    
   2.00000000    
   1.00000000    
   2.00000000    
   1.00000000    
   2.00000000    
   1.00000000    
   0.00000000    
   2.00000000    
   0.00000000    
   0.00000000    
   0.00000000    
   6.00000000    
   0.00000000    
   2.00000000    
   2.00000000    
   0.00000000    
   3.00000000    
   0.00000000    
   4.00000000    
   1.00000000    
   1.00000000    
   1.00000000    
   0.00000000    
   0.00000000    
   4.00000000    
   2.00000000    
   2.00000000    
   3.00000000    
   3.00000000    
   2.00000000    
   2.00000000    
   3.00000000    
   0.00000000    
   2.00000000    
   3.00000000    
   1.00000000    
   2.00000000    
   0.00000000    
   3.00000000    
   2.00000000    
   1.00000000    
   0.00000000    
   1.00000000    
   1.00000000    
   3.00000000    
   4.00000000    
   6.00000000    
   3.00000000    
   4.00000000    
   0.00000000    
   1.00000000    
   6.00000000    
   3.00000000    
   1.00000000    
   2.00000000    
   0.00000000    
   1.00000000    
   4.00000000    
   1.00000000    
   1.00000000    
   1.00000000    
   0.00000000    
   0.00000000    
   0.00000000    
   4.00000000    
   5.00000000    
   2.00000000    
   0.00000000    
   2.00000000    
   1.00000000    
   2.00000000    
   3.00000000    
   0.00000000    
   0.00000000    
   3.00000000    
   0.00000000    
   2.00000000    
   2.00000000    
   1.00000000    
   1.00000000    
   0.00000000    
   2.00000000    
   1.00000000    
   3.00000000    
   4.00000000    
   2.00000000    
   0.00000000    
   0.00000000    
   2.00000000    
   1.00000000    
   2.00000000    
   1.00000000    
   1.00000000    
   2.00000000    
   4.00000000    
   3.00000000    
   3.00000000    
   2.00000000    
   0.00000000    
   2.00000000    
   1.00000000    
   4.00000000    
   2.00000000    
   4.00000000    
   4.00000000    
   1.00000000    
   2.00000000    
   4.00000000    
   2.00000000    
   2.00000000    
   1.00000000    
   1.00000000    
   3.00000000    
   1.00000000    
   2.00000000    
   1.00000000    
   4.00000000    
   4.00000000    
   2.00000000    
   2.00000000    
   2.00000000    
   3.00000000    
   1.00000000    
   1.00000000    
   1.00000000    
   1.00000000    
   1.00000000    
   1.00000000    
   0.00000000    
   3.00000000    
   3.00000000    
   2.00000000    
   4.00000000    
   1.00000000    
   3.00000000    
   3.00000000    
   0.00000000    
   3.00000000    
   0.00000000    
   2.00000000    
   3.00000000    
   6.00000000    
   6.00000000    
   1.00000000    
   0.00000000    
   3.00000000    
   3.00000000    
   4.00000000    
   1.00000000    
   1.00000000    
   0.00000000    
   3.00000000    
   1.00000000    
   1.00000000    
   6.00000000    
   0.00000000    
   1.00000000    
   0.00000000    
   2.00000000    
   3.00000000    
   1.00000000    
   1.00000000    
   3.00000000    
   0.00000000    
   2.00000000    
   7.00000000    
   1.00000000    
   0.00000000    
   3.00000000    
   1.00000000    
   1.00000000    
   5.00000000    
   4.00000000    
   2.00000000    
   3.00000000    
   2.00000000    
   1.00000000    
   3.00000000    
   4.00000000    
   0.00000000    
   1.00000000    
   1.00000000    
   4.00000000    
   0.00000000    
   1.00000000    
   2.00000000    
   4.00000000    
   0.00000000    
   2.00000000    
   2.00000000    
   4.00000000    
   2.00000000    
   2.00000000    
   1.00000000    
   0.00000000    
   3.00000000    
   1.00000000    
   2.00000000    
   3.00000000    
   6.00000000    
   6.00000000    
   0.00000000    
   2.00000000    
   0.00000000    
   2.00000000    
   2.00000000    
   1.00000000    
   3.00000000    
   3.00000000    
   1.00000000    
   0.00000000    
   0.00000000    
   1.00000000    
   2.00000000    
   1.00000000    
   0.00000000    
   0.00000000    
   2.00000000    
   2.00000000    
   0.00000000    
   0.00000000    
   1.00000000    
   1.00000000    
   1.00000000    
   1.00000000    
   1.00000000    
   3.00000000    
   0.00000000    
   3.00000000    
   3.00000000    
   0.00000000    
   1.00000000    
   1.00000000    
   4.00000000    
   2.00000000    
   3.00000000    
   0.00000000    
   2.00000000    
   4.00000000    
   3.00000000    
   2.00000000    
   0.00000000    
   2.00000000    
   2.00000000    
   3.00000000    
   1.00000000    
   5.00000000    
   0.00000000    
   1.00000000    
   2.00000000    
   0.00000000    
   1.00000000    
   1.00000000    
   1.00000000    
   2.00000000    
   0.00000000    
   1.00000000    
   2.00000000    
   0.00000000    
   1.00000000    
   1.00000000    
   1.00000000    
   1.00000000    
   2.00000000    
   0.00000000    
   2.00000000    
   3.00000000    
   2.00000000    
   6.00000000    
   1.00000000    
   1.00000000    
   1.00000000    
   5.00000000    
   2.00000000    
   2.00000000    
   2.00000000    
   4.00000000    
   1.00000000    
   0.00000000    
   2.00000000    
   6.00000000    
   3.00000000    
   2.00000000    
   1.00000000    
   0.00000000    
   0.00000000    
   1.00000000    
   3.00000000    
   2.00000000    
   0.00000000    
   3.00000000    
   1.00000000    
   2.00000000    
   2.00000000    
   0.00000000    
   3.00000000    
   4.00000000    
   1.00000000    
   1.00000000    
   5.00000000    
   2.00000000    
   5.00000000    
   4.00000000    
   1.00000000    
   2.00000000    
   5.00000000    
   2.00000000    
   1.00000000    
   2.00000000    
   1.00000000    
   3.00000000    
   1.00000000    
   2.00000000    
   1.00000000    
   1.00000000    
   3.00000000    
   3.00000000    
   2.00000000    
   1.00000000    
   0.00000000    
   1.00000000    
   2.00000000    
   1.00000000    
   2.00000000    
   1.00000000    
   0.00000000    
   2.00000000    
   2.00000000    
   2.00000000    
   2.00000000    
   6.00000000    
   2.00000000    
   1.00000000    
   0.00000000    
   2.00000000    
   1.00000000    
   2.00000000    
   3.00000000    
   4.00000000    
   1.00000000    
   3.00000000    
   1.00000000    
   1.00000000    
   0.00000000    
   2.00000000    
   1.00000000    
   0.00000000    
   3.00000000    
   4.00000000    
   3.00000000    
   1.00000000    
   0.00000000    
   1.00000000    
   1.00000000    
   1.00000000    
   0.00000000    
   2.00000000    
   5.00000000    
   4.00000000    
   1.00000000    
   4.00000000    
   3.00000000    
   4.00000000    
   1.00000000    
   3.00000000    
   3.00000000    
   5.00000000    
   3.00000000    
   3.00000000    
   4.00000000    
   4.00000000    
   2.00000000    
   2.00000000    
   4.00000000    
   4.00000000    
   2.00000000    
   4.00000000    
   0.00000000    
   3.00000000    
   1.00000000    
   3.00000000    
   3.00000000    
   4.00000000    
   4.00000000    
   3.00000000    
   2.00000000    
   1.00000000    
   0.00000000    
   1.00000000    
   2.00000000    
   1.00000000    
   2.00000000    
   2.00000000    
   1.00000000    
   6.00000000    
   1.00000000    
   1.00000000    
   2.00000000    
   0.00000000    
   2.00000000    
   3.00000000    
   2.00000000    
   1.00000000    
   5.00000000    
   4.00000000    
   3.00000000    
   1.00000000    
   2.00000000    
   1.00000000    
   1.00000000    
   0.00000000    
   1.00000000    
   1.00000000    
   1.00000000    
   1.00000000    
   4.00000000    
   4.00000000    
   1.00000000    
   0.00000000    
   2.00000000    
   2.00000000    
   3.00000000    
   0.00000000    
   3.00000000    
   2.00000000    
   2.00000000    
   0.00000000    
   7.00000000    
   4.00000000    
   4.00000000    
   3.00000000    
   4.00000000    
   3.00000000    
   5.00000000    
   1.00000000    
   2.00000000    
   2.00000000    
   1.00000000    
   3.00000000    
   1.00000000    
   3.00000000    
   1.00000000    
   3.00000000    
   0.00000000    
   1.00000000    
   1.00000000    
   1.00000000    
   1.00000000    
   1.00000000    
   1.00000000    
   3.00000000    
   4.00000000    
   1.00000000    
   2.00000000    
   1.00000000    
   4.00000000    
   0.00000000    
   1.00000000    
   1.00000000    
   3.00000000    
   1.00000000    
   1.00000000    
   2.00000000    
   2.00000000    
   3.00000000    
   0.00000000    
   1.00000000    
   5.00000000    
   2.00000000    
   5.00000000    
   1.00000000    
   1.00000000    
   0.00000000    
   2.00000000    
   0.00000000    
   1.00000000    
   1.00000000    
   2.00000000    
   0.00000000    
   2.00000000    
   3.00000000    
   0.00000000    
   2.00000000    
   1.00000000    
   1.00000000    
   3.00000000    
   1.00000000    
   0.00000000    
   3.00000000    
   1.00000000    
   4.00000000    
   0.00000000    
   9.00000000    
   5.00000000    
   3.00000000    
   2.00000000    
   4.00000000    
   1.00000000    
   2.00000000    
   1.00000000    
   3.00000000    
   0.00000000    
   3.00000000    
   0.00000000    
   0.00000000    
   2.00000000    
   1.00000000    
   1.00000000    
   1.00000000    
   2.00000000    
   2.00000000    
   3.00000000    
   2.00000000    
   3.00000000    
   1.00000000    
   0.00000000    
   1.00000000    
   2.00000000    
   2.00000000    
   2.00000000    
   3.00000000    
   0.00000000    
   0.00000000    
   3.00000000    
   5.00000000    
   2.00000000    
   3.00000000    
   3.00000000    
   0.00000000    
   4.00000000    
   2.00000000    
   3.00000000    
   2.00000000    
   0.00000000    
   0.00000000    
   3.00000000    
   2.00000000    
   0.00000000    
   4.00000000    
   1.00000000    
   4.00000000    
   5.00000000    
   3.00000000    
   2.00000000    
   4.00000000    
   0.00000000    
   2.00000000    
   1.00000000    
   2.00000000    
   1.00000000    
   1.00000000    
   1.00000000    
   1.00000000    
   4.00000000    
   1.00000000    
   1.00000000    
   2.00000000    
   3.00000000    
   1.00000000    
   1.00000000    
   2.00000000    
   1.00000000    
   2.00000000    
   2.00000000    
   2.00000000    
   0.00000000    
   0.00000000    
   3.00000000    
   4.00000000    
   1.00000000    
   2.00000000    
   1.00000000    
   1.00000000    
   1.00000000    
   0.00000000    
   1.00000000    
   1.00000000    
   0.00000000    
   3.00000000    
   2.00000000    
   0.00000000    
   1.00000000    
   2.00000000    
   2.00000000    
   0.00000000    
   2.00000000    
   3.00000000    
   1.00000000    
   2.00000000    
   3.00000000    
   2.00000000    
   0.00000000    
   4.00000000    
   0.00000000    
   2.00000000    
   3.00000000    
   2.00000000    
   4.00000000    
   2.00000000    
   1.00000000    
   2.00000000    
   2.00000000    
   0.00000000    
   2.00000000    
   0.00000000    
   6.00000000    
   5.00000000    
   0.00000000    
   6.00000000    
   2.00000000    
   2.00000000    
   3.00000000    
   4.00000000    
   3.00000000    
   0.00000000    
   3.00000000    
   3.00000000    
   2.00000000    
   4.00000000    
   1.00000000    
   3.00000000    
   0.00000000    
   3.00000000    
   3.00000000    
   1.00000000    
   2.00000000    
   2.00000000    
   3.00000000    
   1.00000000    
   0.00000000    
   0.00000000    
   0.00000000    
   1.00000000    
   1.00000000    
   0.00000000    
   1.00000000    
   2.00000000    
   1.00000000    
   5.00000000    
   1.00000000    
   3.00000000    
   0.00000000    
   2.00000000    
   0.00000000    
   1.00000000    
   1.00000000    
   3.00000000    
   0.00000000    
   4.00000000    
   1.00000000    
   3.00000000    
   0.00000000    
   2.00000000    
   4.00000000    
   1.00000000    
   1.00000000    
   2.00000000    
   2.00000000    
   0.00000000    
   1.00000000    
   2.00000000    
   3.00000000    
   0.00000000    
   0.00000000    
   0.00000000    
   3.00000000    
   2.00000000    
   2.00000000    
   3.00000000    
   3.00000000    
   2.00000000    
   3.00000000    
   1.00000000    
   0.00000000    
   3.00000000    
   2.00000000    
   3.00000000    
   1.00000000    
   0.00000000    
   3.00000000    
   1.00000000    
   0.00000000    
   1.00000000    
   0.00000000    
   2.00000000    
   2.00000000    
   4.00000000    
   2.00000000    
   1.00000000    
   1.00000000    
   1.00000000    
   1.00000000    
   1.00000000    
   2.00000000    
   0.00000000    
   5.00000000    
   0.00000000    
   2.00000000    
   1.00000000    
   1.00000000    
   0.00000000    
   1.00000000    
   0.00000000    
   1.00000000    
   4.00000000    
   2.00000000    
   1.00000000    
   3.00000000    
   1.00000000    
   0.00000000    
   0.00000000    
   0.00000000    
   1.00000000    
   3.00000000    
   4.00000000    
   0.00000000    
   2.00000000    
   1.00000000    
   5.00000000    
   5.00000000    
   3.00000000    
   3.00000000    
   1.00000000    
   2.00000000    
   3.00000000    
   1.00000000    
   3.00000000    
   0.00000000    
   3.00000000    
   1.00000000    
   2.00000000    
   3.00000000    
   4.00000000    
   0.00000000    
   2.00000000    
   3.00000000    
   7.00000000    
   1.00000000    
   2.00000000    
   4.00000000    
   4.00000000    
   1.00000000    
   4.00000000    
   2.00000000    
   4.00000000    
   2.00000000    
   1.00000000    
   2.00000000    
   0.00000000    
   0.00000000    
   0.00000000    
   1.00000000    
   0.00000000    
   1.00000000    
   0.00000000    
   1.00000000    
   1.00000000    
   0.00000000    
   0.00000000    
   1.00000000    
   0.00000000    
   0.00000000    
   2.00000000    
   1.00000000    
   1.00000000    
   1.00000000    
   0.00000000    
   0.00000000    
   5.00000000    
   2.00000000    
   0.00000000    
   2.00000000    
   0.00000000    
   3.00000000    
   4.00000000    
   2.00000000    
   1.00000000    
   4.00000000    
   1.00000000    
   1.00000000    
   4.00000000    
   3.00000000    
   4.00000000    
   2.00000000    
   2.00000000    
   2.00000000    
   2.00000000    
   3.00000000    
   4.00000000    
   5.00000000    
   2.00000000    
   4.00000000    
   3.00000000    
   0.00000000    
   2.00000000    
   2.00000000    
   2.00000000    
   0.00000000    
   2.00000000    
   1.00000000    
   1.00000000    
   4.00000000    
   0.00000000    
   2.00000000    
   0.00000000    
   2.00000000    
   1.00000000    
   1.00000000    
   1.00000000    
   0.00000000    
   1.00000000    
   0.00000000    
   0.00000000    
   2.00000000    
   0.00000000    
   1.00000000    
   1.00000000    
   1.00000000    
   2.00000000    
   0.00000000    
   1.00000000    
   2.00000000    
   0.00000000    
   1.00000000    
   1.00000000    
   1.00000000    
   1.00000000    
   0.00000000    
   1.00000000    
   0.00000000    
   2.00000000    
   0.00000000    
   2.00000000    
   0.00000000    
   1.00000000    
   2.00000000    
   2.00000000    
   4.00000000    
   0.00000000    
   0.00000000    
   1.00000000    
   2.00000000    
   1.00000000    
   2.00000000    
   1.00000000    
   1.00000000    
   3.00000000    
   5.00000000    
   0.00000000    
   4.00000000    
   3.00000000    
   1.00000000    
   5.00000000    
   4.00000000    
   3.00000000    
   1.00000000    
   3.00000000    
   2.00000000    
   2.00000000    
   1.00000000    
   2.00000000    
   2.00000000    
   0.00000000    
   0.00000000    
   1.00000000    
   0.00000000    
   3.00000000    
   1.00000000    
   1.00000000    
   3.00000000    
   0.00000000    
   0.00000000    
   1.00000000    
   0.00000000    
   2.00000000    
   2.00000000    
   0.00000000    
   1.00000000    
   0.00000000    
   2.00000000    
   0.00000000    
   1.00000000    
   1.00000000    
   0.00000000    
   2.00000000    
   4.00000000    
   1.00000000    
   1.00000000    
   1.00000000    
   1.00000000    
   1.00000000    
   1.00000000    
   1.00000000    
   1.00000000    
   0.00000000    
   2.00000000    
   0.00000000    
   2.00000000    
   3.00000000    
   1.00000000    
   1.00000000    
   0.00000000    
   0.00000000    
   2.00000000    
   0.00000000    
   0.00000000    
   0.00000000    
   1.00000000    
   0.00000000    
   1.00000000    
   1.00000000    
   1.00000000    
   0.00000000    
   2.00000000    
   0.00000000    
   3.00000000    
   2.00000000    
   3.00000000    
   0.00000000    
   4.00000000    
   3.00000000    
   2.00000000    
   6.00000000    
   2.00000000    
   3.00000000    
   1.00000000    
   2.00000000    
   4.00000000    
   2.00000000    
   3.00000000    
   3.00000000    
   3.00000000    
   2.00000000    
   3.00000000    
   4.00000000    
   1.00000000    
   1.00000000    
   4.00000000    
   4.00000000    
   1.00000000    
   2.00000000    
   0.00000000    
   0.00000000    
   0.00000000    
   1.00000000    
   3.00000000    
   1.00000000    
   0.00000000    
   0.00000000    
   1.00000000    
   2.00000000    
   1.00000000    
   3.00000000    
   1.00000000    
   4.00000000    
   1.00000000    
   3.00000000    
   3.00000000    
   3.00000000    
   2.00000000    
   0.00000000    
   1.00000000    
   1.00000000    
   2.00000000    
   3.00000000    
   1.00000000    
   0.00000000    
   0.00000000    
   2.00000000    
   1.00000000    
   2.00000000    
   0.00000000    
   2.00000000    
   2.00000000    
   0.00000000    
   3.00000000    
   1.00000000    
   0.00000000    
   4.00000000    
   1.00000000    
   2.00000000    
   2.00000000    
   2.00000000    
   3.00000000    
   6.00000000    
   4.00000000    
   2.00000000    
   2.00000000    
   3.00000000    
   3.00000000    
   2.00000000    
   1.00000000    
   3.00000000    
   1.00000000    
   3.00000000    
   3.00000000    
   3.00000000    
   2.00000000    
   1.00000000    
   2.00000000    
   4.00000000    
   2.00000000    
   2.00000000    
   5.00000000    
   1.00000000    
   2.00000000    
   3.00000000    
   1.00000000    
   3.00000000    
   3.00000000    
   5.00000000    
   1.00000000    
   2.00000000    
   1.00000000    
   2.00000000    
   1.00000000    
   1.00000000    
   0.00000000    
   3.00000000    
   4.00000000    
   0.00000000    
   0.00000000    
   2.00000000    
   3.00000000    
   1.00000000    
   2.00000000    
   1.00000000    
   1.00000000    
   0.00000000    
   3.00000000    
   0.00000000    
   2.00000000    
   3.00000000    
   1.00000000    
   3.00000000    
   2.00000000    
   3.00000000    
   0.00000000    
   1.00000000    
   0.00000000    
   0.00000000    
   0.00000000    
   1.00000000    
   1.00000000    
   3.00000000    
   5.00000000    
   1.00000000    
   2.00000000    
   4.00000000    
   2.00000000    
   3.00000000    
   2.00000000    
   4.00000000    
   3.00000000    
   4.00000000    
   2.00000000    
   4.00000000    
   2.00000000    
   4.00000000    
   6.00000000    
   4.00000000    
   3.00000000    
   3.00000000    
   2.00000000    
   3.00000000    
   4.00000000    
   1.00000000    
   2.00000000    
   2.00000000    
   0.00000000    
   5.00000000    
   3.00000000    
   4.00000000    
   1.00000000    
   2.00000000    
   3.00000000    
   4.00000000    
   1.00000000    
   1.00000000    
   3.00000000    
   5.00000000    
   4.00000000    
   3.00000000    
   2.00000000    
   1.00000000    
   6.00000000    
   2.00000000    
   2.00000000    
   3.00000000    
   1.00000000    
   2.00000000    
   4.00000000    
   2.00000000    
   1.00000000    
   1.00000000    
   0.00000000    
   3.00000000    
   1.00000000    
   3.00000000    
   2.00000000    
   1.00000000    
   0.00000000    
   3.00000000    
   1.00000000    
   2.00000000    
   1.00000000    
   3.00000000    
   2.00000000    
   1.00000000    
   1.00000000    
   2.00000000    
   6.00000000    
   2.00000000    
   3.00000000    
   6.00000000    
   2.00000000    
   5.00000000    
   2.00000000    
   10.0000000    
   7.00000000    
   2.00000000    
   0.00000000    
   4.00000000    
   4.00000000    
   3.00000000    
   3.00000000    
   3.00000000    
   2.00000000    
   1.00000000    
   8.00000000    
   5.00000000    
   2.00000000    
   2.00000000    
   1.00000000    
   3.00000000    
   2.00000000    
   1.00000000    
   1.00000000    
   6.00000000    
   2.00000000    
   2.00000000    
   1.00000000    
   5.00000000    
   4.00000000    
   3.00000000    
   0.00000000    
   3.00000000    
   3.00000000    
   3.00000000    
   5.00000000    
   7.00000000    
   4.00000000    
   2.00000000    
   4.00000000    
   2.00000000    
   3.00000000    
   1.00000000    
   5.00000000    
   4.00000000    
   2.00000000    
   3.00000000    
   3.00000000    
   1.00000000    
   0.00000000    
   0.00000000    
   1.00000000    
   3.00000000    
   1.00000000    
   1.00000000    
   1.00000000    
   2.00000000    
   2.00000000    
   3.00000000    
   2.00000000    
   1.00000000    
   2.00000000    
   2.00000000    
   2.00000000    
   2.00000000    
   6.00000000    
   8.00000000    
   0.00000000    
   10.0000000    
   8.00000000    
   2.00000000    
   4.00000000    
   8.00000000    
   2.00000000    
   4.00000000    
   0.00000000    
   2.00000000    
   8.00000000    
   4.00000000    
   2.00000000    
   2.00000000    
   2.00000000    
   4.00000000    
   6.00000000    
   4.00000000    
   14.0000000    
   6.00000000    
   4.00000000    
   0.00000000    
   0.00000000    
   4.00000000    
   4.00000000    
   0.00000000    
   0.00000000    
   0.00000000    
   2.00000000    
   4.00000000    
   2.00000000    
   6.00000000    
   0.00000000    
   2.00000000    
   2.00000000    
   6.00000000    
   4.00000000    
   4.00000000    
   2.00000000    
   6.00000000    
   2.00000000    
   2.00000000    
   2.00000000    
   0.00000000    
   0.00000000    
   0.00000000    
   0.00000000    
   2.00000000    
   0.00000000    
   2.00000000    
   0.00000000    
   2.00000000    
   0.00000000    
   0.00000000    
   4.00000000    
   0.00000000    
   0.00000000    
   0.00000000    
   3.00000000    
   3.00000000    
   4.00000000    
   5.00000000    
   8.00000000    
   2.00000000    
   2.00000000    
   4.00000000    
   2.00000000    
   7.00000000    
   2.00000000    
   4.00000000    
   3.00000000    
   2.00000000    
   3.00000000    
   3.00000000    
   3.00000000    
   3.00000000    
   1.00000000    
   2.00000000    
   3.00000000    
   3.00000000    
   3.00000000    
   5.00000000    
   7.00000000    
   2.00000000    
   4.00000000    
   0.00000000    
   2.00000000    
   4.00000000    
   4.00000000    
   2.00000000    
   4.00000000    
   5.00000000    
   1.00000000    
   1.00000000    
   3.00000000    
   4.00000000    
   4.00000000    
   4.00000000    
   3.00000000    
   1.00000000    
   2.00000000    
   5.00000000    
   1.00000000    
   4.00000000    
   1.00000000    
   3.00000000    
   1.00000000    
   5.00000000    
   0.00000000    
   1.00000000    
   3.00000000    
   1.00000000    
   1.00000000    
   1.00000000    
   3.00000000    
   1.00000000    
   5.00000000    
   5.00000000    
   3.00000000    
   2.00000000    
   2.00000000    
   1.00000000    
   1.00000000    
   3.00000000    
   3.00000000    
   2.00000000    
   0.00000000    
   2.00000000    
   8.00000000    
   6.00000000    
   2.00000000    
   4.00000000    
   0.00000000    
   3.00000000    
   6.00000000    
   6.00000000    
   3.00000000    
   3.00000000    
   2.00000000    
   3.00000000    
   2.00000000    
   4.00000000    
   6.00000000    
   3.00000000    
   4.00000000    
   6.00000000    
   6.00000000    
   1.00000000    
   1.00000000    
   2.00000000    
   5.00000000    
   2.00000000    
   2.00000000    
   5.00000000    
   3.00000000    
   1.00000000    
   0.00000000    
   3.00000000    
   0.00000000    
   2.00000000    
   4.00000000    
   3.00000000    
   4.00000000    
   7.00000000    
   2.00000000    
   1.00000000    
   1.00000000    
   2.00000000    
   0.00000000    
   1.00000000    
   1.00000000    
   4.00000000    
   4.00000000    
   2.00000000    
   2.00000000    
   3.00000000    
   0.00000000    
   2.00000000    
   1.00000000    
   4.00000000    
   2.00000000    
   1.00000000    
   3.00000000    
   3.00000000    
   2.00000000    
   0.00000000    
   2.00000000    
   2.00000000    
   4.00000000    
   10.0000000    
   10.0000000    
   4.00000000    
   6.00000000    
   6.00000000    
   3.00000000    
   3.00000000    
   3.00000000    
   6.00000000    
   4.00000000    
   8.00000000    
   7.00000000    
   5.00000000    
   8.00000000    
   1.00000000    
   6.00000000    
   3.00000000    
   5.00000000    
   3.00000000    
   3.00000000    
   1.00000000    
   2.00000000    
   3.00000000    
   3.00000000    
   2.00000000    
   5.00000000    
   3.00000000    
   3.00000000    
   7.00000000    
   1.00000000    
   1.00000000    
   2.00000000    
   5.00000000    
   1.00000000    
   4.00000000    
   4.00000000    
   7.00000000    
   2.00000000    
   4.00000000    
   4.00000000    
   3.00000000    
   3.00000000    
   7.00000000    
   1.00000000    
   5.00000000    
   1.00000000    
   1.00000000    
   3.00000000    
   0.00000000    
   2.00000000    
   1.00000000    
   1.00000000    
   1.00000000    
   5.00000000    
   5.00000000    
   4.00000000    
   2.00000000    
   5.00000000    
   0.00000000    
   0.00000000    
   5.00000000    
   4.00000000    
   1.00000000    
   2.00000000    
   7.00000000    
   8.00000000    
   2.00000000    
   2.00000000    
   3.00000000    
   6.00000000    
   3.00000000    
   5.00000000    
   1.00000000    
   5.00000000    
   5.00000000    
   6.00000000    
   4.00000000    
   2.00000000    
   6.00000000    
   3.00000000    
   4.00000000    
   3.00000000    
   2.00000000    
   4.00000000    
   4.00000000    
   2.00000000    
   2.00000000    
   4.00000000    
   6.00000000    
   6.00000000    
   2.00000000    
   4.00000000    
   2.00000000    
   5.00000000    
   3.00000000    
   1.00000000    
   3.00000000    
   9.00000000    
   3.00000000    
   4.00000000    
   3.00000000    
   5.00000000    
   2.00000000    
   8.00000000    
   5.00000000    
   1.00000000    
   2.00000000    
   3.00000000    
   0.00000000    
   1.00000000    
   3.00000000    
   0.00000000    
   2.00000000    
   1.00000000    
   1.00000000    
   2.00000000    
   1.00000000    
   5.00000000    
   2.00000000    
   4.00000000    
   0.00000000    
   2.00000000    
   4.00000000    
   0.00000000    
   0.00000000    
   2.00000000    
   3.00000000    
   4.00000000    
   2.00000000    
   2.00000000    
   7.00000000    
   4.00000000    
   3.00000000    
   3.00000000    
   4.00000000    
   1.00000000    
   4.00000000    
   9.00000000    
   15.0000000    
   4.00000000    
   3.00000000    
   4.00000000    
   5.00000000    
   1.00000000    
   3.00000000    
   2.00000000    
   0.00000000    
   6.00000000    
   5.00000000    
   5.00000000    
   9.00000000    
   3.00000000    
   1.00000000    
   2.00000000    
   2.00000000    
   1.00000000    
   5.00000000    
   4.00000000    
   2.00000000    
   0.00000000    
   1.00000000    
   2.00000000    
   3.00000000    
   1.00000000    
   4.00000000    
   4.00000000    
   3.00000000    
   4.00000000    
   2.00000000    
   2.00000000    
   1.00000000    
   2.00000000    
   6.00000000    
   0.00000000    
   7.00000000    
   2.00000000    
   1.00000000    
   1.00000000    
   1.00000000    
   1.00000000    
   3.00000000    
   2.00000000    
   3.00000000    
   2.00000000    
   0.00000000    
   1.00000000    
   1.00000000    
   1.00000000    
   2.00000000    
   3.00000000    
   1.00000000    
   2.00000000    
   0.00000000    
   4.00000000    
   2.00000000    
   0.00000000    
   3.00000000    
   5.00000000    
   1.00000000    
   12.0000000    
   6.00000000    
   8.00000000    
   5.00000000    
   3.00000000    
   4.00000000    
   8.00000000    
   2.00000000    
   6.00000000    
   0.00000000    
   3.00000000    
   4.00000000    
   4.00000000    
   5.00000000    
   1.00000000    
   6.00000000    
   2.00000000    
   7.00000000    
   5.00000000    
   2.00000000    
   1.00000000    
   2.00000000    
   2.00000000    
   2.00000000    
   3.00000000    
   4.00000000    
   2.00000000    
   5.00000000    
   4.00000000    
   4.00000000    
   4.00000000    
   3.00000000    
   3.00000000    
   1.00000000    
   2.00000000    
   2.00000000    
   0.00000000    
   4.00000000    
   1.00000000    
   1.00000000    
   2.00000000    
   1.00000000    
   0.00000000    
   1.00000000    
   1.00000000    
   1.00000000    
   2.00000000    
   2.00000000    
   1.00000000    
   2.00000000    
   1.00000000    
   2.00000000    
   3.00000000    
   0.00000000    
   3.00000000    
   3.00000000    
   4.00000000    
   4.00000000    
   8.00000000    
   4.00000000    
   3.00000000    
   6.00000000    
   1.00000000    
   4.00000000    
   6.00000000    
   6.00000000    
   4.00000000    
   4.00000000    
   7.00000000    
   2.00000000    
   3.00000000    
   2.00000000    
   5.00000000    
   2.00000000    
   2.00000000    
   1.00000000    
   4.00000000    
   1.00000000    
   2.00000000    
   5.00000000    
   6.00000000    
   0.00000000    
   1.00000000    
   0.00000000    
   2.00000000    
   2.00000000    
   1.00000000    
   2.00000000    
   4.00000000    
   2.00000000    
   6.00000000    
   1.00000000    
   5.00000000    
   3.00000000    
   2.00000000    
   5.00000000    
   3.00000000    
   1.00000000    
   3.00000000    
   1.00000000    
   3.00000000    
   4.00000000    
   0.00000000    
   5.00000000    
   1.00000000    
   1.00000000    
   4.00000000    
   2.00000000    
   1.00000000    
   2.00000000    
   2.00000000    
   1.00000000    
   2.00000000    
   0.00000000    
   1.00000000    
   0.00000000    
   0.00000000    
   0.00000000    
   3.00000000    
   3.00000000    
   6.00000000    
   4.00000000    
   2.00000000    
   3.00000000    
   6.00000000    
   4.00000000    
   5.00000000    
   9.00000000    
   8.00000000    
   4.00000000    
   0.00000000    
   4.00000000    
   3.00000000    
   1.00000000    
   5.00000000    
   1.00000000    
   3.00000000    
   1.00000000    
   3.00000000    
   2.00000000    
   4.00000000    
   5.00000000    
   3.00000000    
   2.00000000    
   1.00000000    
   4.00000000    
   1.00000000    
   4.00000000    
   2.00000000    
   3.00000000    
   2.00000000    
   2.00000000    
   1.00000000    
   3.00000000    
   2.00000000    
   4.00000000    
   4.00000000    
   5.00000000    
   6.00000000    
   4.00000000    
   5.00000000    
   5.00000000    
   1.00000000    
   1.00000000    
   3.00000000    
   4.00000000    
   0.00000000    
   2.00000000    
   2.00000000    
   5.00000000    
   2.00000000    
   4.00000000    
   1.00000000    
   6.00000000    
   1.00000000    
   3.00000000    
   0.00000000    
   1.00000000    
   1.00000000    
   3.00000000    
   0.00000000    
   2.00000000    
   2.00000000    
   3.00000000    
   4.00000000    
   3.00000000    
   4.00000000    
   2.00000000    
   6.00000000    
   8.00000000    
   5.00000000    
   15.0000000    
   5.00000000    
   4.00000000    
   4.00000000    
   2.00000000    
   8.00000000    
   2.00000000    
   3.00000000    
   4.00000000    
   2.00000000    
   2.00000000    
   2.00000000    
   1.00000000    
   2.00000000    
   2.00000000    
   3.00000000    
   1.00000000    
   4.00000000    
   4.00000000    
   3.00000000    
   3.00000000    
   1.00000000    
   2.00000000    
   4.00000000    
   3.00000000    
   3.00000000    
   1.00000000    
   5.00000000    
   2.00000000    
   6.00000000    
   3.00000000    
   2.00000000    
   4.00000000    
   6.00000000    
   4.00000000    
   2.00000000    
   4.00000000    
   2.00000000    
   1.00000000    
   4.00000000    
   1.00000000    
   4.00000000    
   1.00000000    
   3.00000000    
   2.00000000    
   1.00000000    
   6.00000000    
   7.00000000    
   2.00000000    
   2.00000000    
   3.00000000    
   0.00000000    
   2.00000000    
   2.00000000    
   1.00000000    
   3.00000000    
   2.00000000    
   3.00000000    
   3.00000000    
   0.00000000    
   3.00000000    
   3.00000000    
   7.00000000    
   6.00000000    
   4.00000000    
   3.00000000    
   7.00000000    
   3.00000000    
   8.00000000    
   0.00000000    
   2.00000000    
   5.00000000    
   2.00000000    
   2.00000000    
   8.00000000    
   2.00000000    
   3.00000000    
   3.00000000    
   1.00000000    
   5.00000000    
   7.00000000    
   2.00000000    
   2.00000000    
   0.00000000    
   4.00000000    
   2.00000000    
   1.00000000    
   2.00000000    
   1.00000000    
   3.00000000    
   1.00000000    
   7.00000000    
   4.00000000    
   2.00000000    
   1.00000000    
   2.00000000    
   1.00000000    
   2.00000000    
   5.00000000    
   2.00000000    
   1.00000000    
   7.00000000    
   4.00000000    
   1.00000000    
   1.00000000    
   2.00000000    
   3.00000000    
   4.00000000    
   2.00000000    
   1.00000000    
   3.00000000    
   3.00000000    
   1.00000000    
   5.00000000    
   2.00000000    
   2.00000000    
   1.00000000    
   2.00000000    
   0.00000000    
   4.00000000    
   1.00000000    
   3.00000000    
   3.00000000    
   2.00000000    
   3.00000000    
   3.00000000    
   5.00000000    
   4.00000000    
   3.00000000    
   4.00000000    
   2.00000000    
   1.00000000    
   2.00000000    
   2.00000000    
   4.00000000    
   0.00000000    
   6.00000000    
   1.00000000    
   6.00000000    
   3.00000000    
   0.00000000    
   2.00000000    
   3.00000000    
   3.00000000    
   1.00000000    
   3.00000000    
   1.00000000    
   4.00000000    
   2.00000000    
   5.00000000    
   6.00000000    
   2.00000000    
   3.00000000    
   4.00000000    
   4.00000000    
   5.00000000    
   2.00000000    
   3.00000000    
   0.00000000    
   1.00000000    
   8.00000000    
   1.00000000    
   3.00000000    
   3.00000000    
   2.00000000    
   3.00000000    
   2.00000000    
   4.00000000    
   0.00000000    
   1.00000000    
   1.00000000    
   2.00000000    
   4.00000000    
   3.00000000    
   1.00000000    
   0.00000000    
   2.00000000    
   3.00000000    
   3.00000000    
   1.00000000    
   0.00000000    
   2.00000000    
   0.00000000    
   1.00000000    
   2.00000000    
   2.00000000    
   2.00000000    
   8.00000000    
   3.00000000    
   2.00000000    
   8.00000000    
   2.00000000    
   4.00000000    
   8.00000000    
   3.00000000    
   5.00000000    
   3.00000000    
   5.00000000    
   0.00000000    
   4.00000000    
   2.00000000    
   5.00000000    
   0.00000000    
   0.00000000    
   3.00000000    
   4.00000000    
   3.00000000    
   4.00000000    
   4.00000000    
   6.00000000    
   1.00000000    
   2.00000000    
   2.00000000    
   4.00000000    
   3.00000000    
   1.00000000    
   0.00000000    
   2.00000000    
   4.00000000    
   3.00000000    
   2.00000000    
   4.00000000    
   3.00000000    
   1.00000000    
   5.00000000    
   4.00000000    
   2.00000000    
   6.00000000    
   4.00000000    
   4.00000000    
   2.00000000    
   6.00000000    
   5.00000000    
   4.00000000    
   1.00000000    
   3.00000000    
   5.00000000    
   2.00000000    
   0.00000000    
   0.00000000    
   3.00000000    
   5.00000000    
   0.00000000    
   0.00000000    
   0.00000000    
   1.00000000    
   0.00000000    
   1.00000000    
   4.00000000    
   3.00000000    
   1.00000000    
   4.00000000    
   3.00000000    
   3.00000000    
   1.00000000    
   6.00000000    
   5.00000000    
   2.00000000    
   2.00000000    
   1.00000000    
   4.00000000    
   2.00000000    
   6.00000000    
   2.00000000    
   2.00000000    
   7.00000000    
   2.00000000    
   0.00000000    
   3.00000000    
   3.00000000    
   5.00000000    
   3.00000000    
   5.00000000    
   1.00000000    
   3.00000000    
   1.00000000    
   2.00000000    
   3.00000000    
   1.00000000    
   3.00000000    
   5.00000000    
   1.00000000    
   4.00000000    
   1.00000000    
   3.00000000    
   2.00000000    
   4.00000000    
   6.00000000    
   8.00000000    
   3.00000000    
   4.00000000    
   1.00000000    
   3.00000000    
   5.00000000    
   3.00000000    
   2.00000000    
   5.00000000    
   5.00000000    
   2.00000000    
   3.00000000    
   2.00000000    
   4.00000000    
   1.00000000    
   2.00000000    
   4.00000000    
   2.00000000    
   1.00000000    
   0.00000000    
   2.00000000    
   1.00000000    
   1.00000000    
   4.00000000    
   2.00000000    
   4.00000000    
   8.00000000    
   2.00000000    
   1.00000000    
   2.00000000    
   6.00000000    
   3.00000000    
   1.00000000    
   6.00000000    
   5.00000000    
   3.00000000    
   2.00000000    
   2.00000000    
   1.00000000    
   5.00000000    
   7.00000000    
   0.00000000    
   3.00000000    
   6.00000000    
   1.00000000    
   8.00000000    
   4.00000000    
   3.00000000    
   1.00000000    
   1.00000000    
   2.00000000    
   3.00000000    
   1.00000000    
   1.00000000    
   3.00000000    
   3.00000000    
   2.00000000    
   6.00000000    
   1.00000000    
   4.00000000    
   2.00000000    
   3.00000000    
   6.00000000    
   4.00000000    
   5.00000000    
   0.00000000    
   2.00000000    
   2.00000000    
   6.00000000    
   1.00000000    
   3.00000000    
   4.00000000    
   3.00000000    
   3.00000000    
   3.00000000    
   1.00000000    
   8.00000000    
   6.00000000    
   1.00000000    
   2.00000000    
   1.00000000    
   3.00000000    
   4.00000000    
   1.00000000    
   0.00000000    
   1.00000000    
   2.00000000    
   4.00000000    
   2.00000000    
   1.00000000    
   5.00000000    
   2.00000000    
   2.00000000    
   4.00000000    
   3.00000000    
   4.00000000    
   3.00000000    
   0.00000000    
   2.00000000    
   1.00000000    
   2.00000000    
   8.00000000    
   6.00000000    
   0.00000000    
   2.00000000    
   3.00000000    
   2.00000000    
   3.00000000    
   2.00000000    
   1.00000000    
   3.00000000    
   1.00000000    
   4.00000000    
   2.00000000    
   2.00000000    
   4.00000000    
   3.00000000    
   6.00000000    
   2.00000000    
   4.00000000    
   3.00000000    
   2.00000000    
   5.00000000    
   1.00000000    
   2.00000000    
   2.00000000    
   3.00000000    
   2.00000000    
   2.00000000    
   8.00000000    
   3.00000000    
   5.00000000    
   6.00000000    
   0.00000000    
   1.00000000    
   0.00000000    
   4.00000000    
   2.00000000    
   4.00000000    
   3.00000000    
   2.00000000    
   1.00000000    
   4.00000000    
   7.00000000    
   3.00000000    
   2.00000000    
   2.00000000    
   2.00000000    
   1.00000000    
   2.00000000    
   2.00000000    
   1.00000000    
   5.00000000    
   2.00000000    
   2.00000000    
   2.00000000    
   3.00000000    
   6.00000000    
   5.00000000    
   3.00000000    
   2.00000000    
   3.00000000    
   2.00000000    
   3.00000000    
   2.00000000    
   2.00000000    
   3.00000000    
   0.00000000    
   0.00000000    
   6.00000000    
   3.00000000    
   2.00000000    
   3.00000000    
   1.00000000    
   4.00000000    
   3.00000000    
   3.00000000    
   3.00000000    
   4.00000000    
   5.00000000    
   3.00000000    
   7.00000000    
   3.00000000    
   7.00000000    
   4.00000000    
   3.00000000    
   3.00000000    
   3.00000000    
   4.00000000    
   2.00000000    
   2.00000000    
   2.00000000    
   4.00000000    
   2.00000000    
   5.00000000    
   7.00000000    
   6.00000000    
   3.00000000    
   5.00000000    
   2.00000000    
   4.00000000    
   4.00000000    
   3.00000000    
   5.00000000    
   2.00000000    
   4.00000000    
   2.00000000    
   3.00000000    
   1.00000000    
   2.00000000    
   4.00000000    
   1.00000000    
   2.00000000    
   0.00000000    
   2.00000000    
   2.00000000    
   1.00000000    
   2.00000000    
   2.00000000    
   4.00000000    
   3.00000000    
   3.00000000    
   3.00000000    
   2.00000000    
   0.00000000    
   4.00000000    
   1.00000000    
   2.00000000    
   1.00000000    
   3.00000000    
   0.00000000    
   3.00000000    
   3.00000000    
   1.00000000    
   2.00000000    
   3.00000000    
   2.00000000    
   1.00000000    
   2.00000000    
   6.00000000    
   2.00000000    
   1.00000000    
   4.00000000    
   6.00000000    
   3.00000000    
   3.00000000    
   2.00000000    
   5.00000000    
   1.00000000    
   2.00000000    
   4.00000000    
   10.0000000    
   5.00000000    
   6.00000000    
   6.00000000    
   0.00000000    
   0.00000000    
   1.00000000    
   2.00000000    
   4.00000000    
   3.00000000    
   2.00000000    
   1.00000000    
   2.00000000    
   5.00000000    
   1.00000000    
   5.00000000    
   3.00000000    
   3.00000000    
   3.00000000    
   5.00000000    
   8.00000000    
   7.00000000    
   5.00000000    
   4.00000000    
   1.00000000    
   1.00000000    
   1.00000000    
   0.00000000    
   0.00000000    
   2.00000000    
   0.00000000    
   1.00000000    
   6.00000000    
   3.00000000    
   4.00000000    
   3.00000000    
   4.00000000    
   6.00000000    
   4.00000000    
   4.00000000    
   4.00000000    
   2.00000000    
   3.00000000    
   2.00000000    
   4.00000000    
   3.00000000    
   8.00000000    
   1.00000000    
   1.00000000    
   1.00000000    
   0.00000000    
   3.00000000    
   3.00000000    
   3.00000000    
   3.00000000    
   6.00000000    
   4.00000000    
   4.00000000    
   8.00000000    
   8.00000000    
   5.00000000    
   3.00000000    
   5.00000000    
   3.00000000    
   3.00000000    
   3.00000000    
   1.00000000    
   3.00000000    
   4.00000000    
   6.00000000    
   2.00000000    
   3.00000000    
   1.00000000    
   2.00000000    
   2.00000000    
   5.00000000    
   6.00000000    
   3.00000000    
   6.00000000    
   3.00000000    
   2.00000000    
   4.00000000    
   2.00000000    
   7.00000000    
   3.00000000    
   8.00000000    
   3.00000000    
   8.00000000    
   4.00000000    
   1.00000000    
   2.00000000    
   0.00000000    
   0.00000000    
   3.00000000    
   5.00000000    
   3.00000000    
   4.00000000    
   5.00000000    
   6.00000000    
   1.00000000    
   4.00000000    
   5.00000000    
   5.00000000    
   1.00000000    
   5.00000000    
   2.00000000    
   1.00000000    
   3.00000000    
   3.00000000    
   5.00000000    
   4.00000000    
   3.00000000    
   4.00000000    
   2.00000000    
   3.00000000    
   4.00000000    
   3.00000000    
   5.00000000    
   2.00000000    
   3.00000000    
   2.00000000    
   6.00000000    
   7.00000000    
   3.00000000    
   3.00000000    
   3.00000000    
   4.00000000    
   2.00000000    
   2.00000000    
   2.00000000    
   6.00000000    
   3.00000000    
   5.00000000    
   3.00000000    
   3.00000000    
   2.00000000    
   1.00000000    
   2.00000000    
   2.00000000    
   4.00000000    
   4.00000000    
   2.00000000    
   6.00000000    
   5.00000000    
   3.00000000    
   0.00000000    
   6.00000000    
   8.00000000    
   4.00000000    
   4.00000000    
   5.00000000    
   1.00000000    
   3.00000000    
   1.00000000    
   1.00000000    
   2.00000000    
   0.00000000    
   1.00000000    
   3.00000000    
   2.00000000    
   14.0000000    
   7.00000000    
   6.00000000    
   2.00000000    
   2.00000000    
   5.00000000    
   1.00000000    
   2.00000000    
   3.00000000    
   3.00000000    
   5.00000000    
   3.00000000    
   4.00000000    
   3.00000000    
   3.00000000    
   1.00000000    
   3.00000000    
   6.00000000    
   3.00000000    
   3.00000000    
   0.00000000    
   3.00000000    
   5.00000000    
   2.00000000    
   3.00000000    
   8.00000000    
   3.00000000    
   4.00000000    
   4.00000000    
   2.00000000    
   6.00000000    
   2.00000000    
   3.00000000    
   1.00000000    
   3.00000000    
   2.00000000    
   3.00000000    
   4.00000000    
   2.00000000    
   4.00000000    
   6.00000000    
   0.00000000    
   1.00000000    
   4.00000000    
   3.00000000    
   4.00000000    
   4.00000000    
   6.00000000    
   4.00000000    
   5.00000000    
   9.00000000    
   3.00000000    
   3.00000000    
   5.00000000    
   7.00000000    
   3.00000000    
   0.00000000    
   1.00000000    
   2.00000000    
   0.00000000    
   1.00000000    
   3.00000000    
   4.00000000    
   1.00000000    
   6.00000000    
   2.00000000    
   1.00000000    
   3.00000000    
   2.00000000    
   9.00000000    
   6.00000000    
   5.00000000    
   2.00000000    
   1.00000000    
   7.00000000    
   1.00000000    
   4.00000000    
   5.00000000    
   1.00000000    
   4.00000000    
   3.00000000    
   2.00000000    
   3.00000000    
   5.00000000    
   3.00000000    
   6.00000000    
   5.00000000    
   3.00000000    
   6.00000000    
   3.00000000    
   5.00000000    
   4.00000000    
   2.00000000    
   1.00000000    
   2.00000000    
   7.00000000    
   5.00000000    
   4.00000000    
   1.00000000    
   4.00000000    
   4.00000000    
   3.00000000    
   2.00000000    
   2.00000000    
   4.00000000    
   2.00000000    
   2.00000000    
   5.00000000    
   3.00000000    
   1.00000000    
   3.00000000    
   3.00000000    
   2.00000000    
   3.00000000    
   6.00000000    
   1.00000000    
   4.00000000    
   3.00000000    
   4.00000000    
   2.00000000    
   1.00000000    
   2.00000000    
   1.00000000    
   1.00000000    
   3.00000000    
   3.00000000    
   1.00000000    
   1.00000000    
   4.00000000    
   4.00000000    
   1.00000000    
   3.00000000    
   4.00000000    
   3.00000000    
   2.00000000    
   6.00000000    
   1.00000000    
   4.00000000    
   2.00000000    
   3.00000000    
   6.00000000    
   1.00000000    
   1.00000000    
   2.00000000    
   3.00000000    
   1.00000000    
   3.00000000    
   2.00000000    
   5.00000000    
   5.00000000    
   2.00000000    
   3.00000000    
   3.00000000    
   4.00000000    
   1.00000000    
   3.00000000    
   3.00000000    
   6.00000000    
   3.00000000    
   4.00000000    
   2.00000000    
   1.00000000    
   3.00000000    
   0.00000000    
   2.00000000    
   1.00000000    
   3.00000000    
   1.00000000    
   1.00000000    
   2.00000000    
   1.00000000    
   6.00000000    
   4.00000000    
   3.00000000    
   2.00000000    
   3.00000000    
   3.00000000    
   8.00000000    
   3.00000000    
   3.00000000    
   2.00000000    
   2.00000000    
   2.00000000    
   1.00000000    
   3.00000000    
   0.00000000    
   1.00000000    
   1.00000000    
   1.00000000    
   5.00000000    
   2.00000000    
   6.00000000    
   0.00000000    
   0.00000000    
   2.00000000    
   2.00000000    
   6.00000000    
   1.00000000    
   7.00000000    
   0.00000000    
   4.00000000    
   4.00000000    
   2.00000000    
   1.00000000    
   1.00000000    
   3.00000000    
   2.00000000    
   2.00000000    
   4.00000000    
   4.00000000    
   6.00000000    
   3.00000000    
   2.00000000    
   3.00000000    
   3.00000000    
   8.00000000    
   4.00000000    
   1.00000000    
   3.00000000    
   1.00000000    
   7.00000000    
   4.00000000    
   1.00000000    
   3.00000000    
   3.00000000    
   3.00000000    
   2.00000000    
   3.00000000    
   5.00000000    
   2.00000000    
   1.00000000    
   3.00000000    
   1.00000000    
   0.00000000    
   2.00000000    
   3.00000000    
   4.00000000    
   2.00000000    
   3.00000000    
   3.00000000    
   1.00000000    
   2.00000000    
   6.00000000    
   3.00000000    
   3.00000000    
   1.00000000    
   5.00000000    
   4.00000000    
   1.00000000    
   1.00000000    
   0.00000000    
   0.00000000    
   0.00000000    
   1.00000000    
   3.00000000    
   2.00000000    
   0.00000000    
   2.00000000    
   5.00000000    
   5.00000000    
   6.00000000    
   2.00000000    
   5.00000000    
   1.00000000    
   1.00000000    
   3.00000000    
   0.00000000    
   4.00000000    
   2.00000000    
   1.00000000    
   3.00000000    
   4.00000000    
   5.00000000    
   6.00000000    
   4.00000000    
   2.00000000    
   3.00000000    
   6.00000000    
   3.00000000    
   4.00000000    
   4.00000000    
   5.00000000    
   1.00000000    
   4.00000000    
   3.00000000    
   4.00000000    
   0.00000000    
   3.00000000    
   4.00000000    
   2.00000000    
   1.00000000    
   4.00000000    
   3.00000000    
   2.00000000    
   1.00000000    
   1.00000000    
   0.00000000    
   1.00000000    
   1.00000000    
   3.00000000    
   4.00000000    
   1.00000000    
   4.00000000    
   3.00000000    
   2.00000000    
   0.00000000    
   4.00000000    
   3.00000000    
   3.00000000    
   1.00000000    
   3.00000000    
   1.00000000    
   1.00000000    
   6.00000000    
   1.00000000    
   1.00000000    
   0.00000000    
   2.00000000    
   4.00000000    
   2.00000000    
   4.00000000    
   4.00000000    
   2.00000000    
   3.00000000    
   2.00000000    
   2.00000000    
   2.00000000    
   0.00000000    
   4.00000000    
   3.00000000    
   4.00000000    
   2.00000000    
   2.00000000    
   2.00000000    
   1.00000000    
   3.00000000    
   3.00000000    
   3.00000000    
   4.00000000    
   6.00000000    
   8.00000000    
   3.00000000    
   4.00000000    
   1.00000000    
   5.00000000    
   2.00000000    
   3.00000000    
   5.00000000    
   2.00000000    
   5.00000000    
   3.00000000    
   3.00000000    
   1.00000000    
   2.00000000    
   2.00000000    
   2.00000000    
   2.00000000    
   2.00000000    
   1.00000000    
   4.00000000    
   4.00000000    
   3.00000000    
   2.00000000    
   1.00000000    
   0.00000000    
   4.00000000    
   2.00000000    
   0.00000000    
   2.00000000    
   5.00000000    
   2.00000000    
   2.00000000    
   1.00000000    
   1.00000000    
   4.00000000    
   2.00000000    
   1.00000000    
   1.00000000    
   1.00000000    
   0.00000000    
   1.00000000    
   1.00000000    
   1.00000000    
   1.00000000    
   4.00000000    
   4.00000000    
   2.00000000    
   3.00000000    
   4.00000000    
   1.00000000    
   1.00000000    
   2.00000000    
   2.00000000    
   1.00000000    
   2.00000000    
   5.00000000    
   4.00000000    
   3.00000000    
   1.00000000    
   6.00000000    
   7.00000000    
   3.00000000    
   8.00000000    
   7.00000000    
   3.00000000    
   5.00000000    
   1.00000000    
   3.00000000    
   1.00000000    
   3.00000000    
   0.00000000    
   8.00000000    
   2.00000000    
   3.00000000    
   3.00000000    
   6.00000000    
   2.00000000    
   4.00000000    
   5.00000000    
   2.00000000    
   4.00000000    
   2.00000000    
   1.00000000    
   1.00000000    
   0.00000000    
   2.00000000    
   1.00000000    
   3.00000000    
   1.00000000    
   1.00000000    
   1.00000000    
   3.00000000    
   2.00000000    
   4.00000000    
   3.00000000    
   3.00000000    
   0.00000000    
   0.00000000    
   2.00000000    
   0.00000000    
   1.00000000    
   1.00000000    
   0.00000000    
   0.00000000    
   2.00000000    
   2.00000000    
   1.00000000    
   5.00000000    
   0.00000000    
   2.00000000    
   5.00000000    
   7.00000000    
   2.00000000    
   5.00000000    
   2.00000000    
   2.00000000    
   3.00000000    
   2.00000000    
   1.00000000    
   6.00000000    
   3.00000000    
   1.00000000    
   3.00000000    
   2.00000000    
   3.00000000    
   2.00000000    
   8.00000000    
   3.00000000    
   4.00000000    
   4.00000000    
   3.00000000    
   1.00000000    
   4.00000000    
   5.00000000    
   8.00000000    
   4.00000000    
   4.00000000    
   6.00000000    
   5.00000000    
   4.00000000    
   5.00000000    
   2.00000000    
   3.00000000    
   2.00000000    
   3.00000000    
   1.00000000    
   3.00000000    
   1.00000000    
   2.00000000    
   1.00000000    
   0.00000000    
   2.00000000    
   3.00000000    
   1.00000000    
   1.00000000    
   4.00000000    
   1.00000000    
   1.00000000    
   4.00000000    
   2.00000000    
   0.00000000    
   1.00000000    
   2.00000000    
   1.00000000    
   1.00000000    
   0.00000000    
   1.00000000    
   2.00000000    
   1.00000000    
   1.00000000    
   3.00000000    
   4.00000000    
   0.00000000    
   4.00000000    
   3.00000000    
   1.00000000    
   5.00000000    
   4.00000000    
   2.00000000    
   1.00000000    
   2.00000000    
   4.00000000    
   2.00000000    
   2.00000000    
   1.00000000    
   3.00000000    
   3.00000000    
   4.00000000    
   7.00000000    
   5.00000000    
   5.00000000    
   3.00000000    
   4.00000000    
   2.00000000    
   3.00000000    
   7.00000000    
   3.00000000    
   2.00000000    
   2.00000000    
   4.00000000    
   2.00000000    
   8.00000000    
   2.00000000    
   2.00000000    
   2.00000000    
   4.00000000    
   2.00000000    
   2.00000000    
   2.00000000    
   2.00000000    
   1.00000000    
   1.00000000    
   1.00000000    
   1.00000000    
   1.00000000    
   2.00000000    
   3.00000000    
   2.00000000    
   2.00000000    
   2.00000000    
   3.00000000    
   1.00000000    
   1.00000000    
   4.00000000    
   2.00000000    
   3.00000000    
   4.00000000    
   1.00000000    
   2.00000000    
   2.00000000    
   1.00000000    
   1.00000000    
   3.00000000    
   1.00000000    
   5.00000000    
   3.00000000    
   0.00000000    
   5.00000000    
   1.00000000    
   1.00000000    
   3.00000000    
   2.00000000    
   2.00000000    
   2.00000000    
   2.00000000    
   3.00000000    
   1.00000000    
   3.00000000    
   0.00000000    
   5.00000000    
   2.00000000    
   3.00000000    
   4.00000000    
   1.00000000    
   3.00000000    
   3.00000000    
   2.00000000    
   1.00000000    
   6.00000000    
   4.00000000    
   4.00000000    
   5.00000000    
   3.00000000    
   6.00000000    
   8.00000000    
   0.00000000    
   2.00000000    
   2.00000000    
   1.00000000    
   5.00000000    
   5.00000000    
   3.00000000    
   0.00000000    
   1.00000000    
   3.00000000    
   1.00000000    
   1.00000000    
   1.00000000    
   3.00000000    
   0.00000000    
   2.00000000    
   2.00000000    
   3.00000000    
   1.00000000    
   4.00000000    
   2.00000000    
   0.00000000    
   1.00000000    
   1.00000000    
   2.00000000    
   3.00000000    
   2.00000000    
   0.00000000    
   3.00000000    
   0.00000000    
   1.00000000    
   1.00000000    
   0.00000000    
   4.00000000    
   0.00000000    
   2.00000000    
   1.00000000    
   0.00000000    
   2.00000000    
   1.00000000    
   0.00000000    
   3.00000000    
   4.00000000    
   1.00000000    
   3.00000000    
   3.00000000    
   4.00000000    
   2.00000000    
   1.00000000    
   6.00000000    
   2.00000000    
   3.00000000    
   2.00000000    
   5.00000000    
   4.00000000    
   6.00000000    
   2.00000000    
   3.00000000    
   1.00000000    
   0.00000000    
   3.00000000    
   3.00000000    
   5.00000000    
   2.00000000    
   2.00000000    
   0.00000000    
   3.00000000    
   3.00000000    
   1.00000000    
   3.00000000    
   1.00000000    
   2.00000000    
   2.00000000    
   1.00000000    
   2.00000000    
   2.00000000    
   0.00000000    
   2.00000000    
   2.00000000    
   2.00000000    
   1.00000000    
   1.00000000    
   0.00000000    
   0.00000000    
   3.00000000    
   1.00000000    
   2.00000000    
   1.00000000    
   3.00000000    
   2.00000000    
   2.00000000    
   0.00000000    
   2.00000000    
   2.00000000    
   0.00000000    
   4.00000000    
   3.00000000    
   3.00000000    
   3.00000000    
   4.00000000    
   1.00000000    
   3.00000000    
   5.00000000    
   3.00000000    
   1.00000000    
   4.00000000    
   2.00000000    
   3.00000000    
   1.00000000    
   1.00000000    
   4.00000000    
   4.00000000    
   4.00000000    
   1.00000000    
   5.00000000    
   3.00000000    
   4.00000000    
   3.00000000    
   2.00000000    
   2.00000000    
   7.00000000    
   4.00000000    
   3.00000000    
   3.00000000    
   3.00000000    
   6.00000000    
   4.00000000    
   2.00000000    
   2.00000000    
   3.00000000    
   4.00000000    
   1.00000000    
   2.00000000    
   4.00000000    
   2.00000000    
   1.00000000    
   3.00000000    
   2.00000000    
   1.00000000    
   1.00000000    
   2.00000000    
   0.00000000    
   0.00000000    
   0.00000000    
   3.00000000    
   1.00000000    
   2.00000000    
   2.00000000    
   3.00000000    
   1.00000000    
   3.00000000    
   1.00000000    
   2.00000000    
   1.00000000    
   1.00000000    
   1.00000000    
   1.00000000    
   0.00000000    
   0.00000000    
   1.00000000    
   4.00000000    
   2.00000000    
   3.00000000    
   2.00000000    
   3.00000000    
   0.00000000    
   1.00000000    
   9.00000000    
   2.00000000    
   2.00000000    
   6.00000000    
   2.00000000    
   5.00000000    
   7.00000000    
   5.00000000    
   3.00000000    
   1.00000000    
   4.00000000    
   1.00000000    
   3.00000000    
   10.0000000    
   3.00000000    
   2.00000000    
   3.00000000    
   5.00000000    
   2.00000000    
   3.00000000    
   4.00000000    
   1.00000000    
   2.00000000    
   5.00000000    
   2.00000000    
   1.00000000    
   3.00000000    
   1.00000000    
   4.00000000    
   1.00000000    
   2.00000000    
   1.00000000    
   2.00000000    
   1.00000000    
   1.00000000    
   3.00000000    
   1.00000000    
   0.00000000    
   3.00000000    
   0.00000000    
   2.00000000    
   3.00000000    
   3.00000000    
   3.00000000    
   2.00000000    
   4.00000000    
   3.00000000    
   0.00000000    
   2.00000000    
   1.00000000    
   4.00000000    
   2.00000000    
   1.00000000    
   1.00000000    
   1.00000000    
   0.00000000    
   3.00000000    
   0.00000000    
   1.00000000    
   3.00000000    
   6.00000000    
   4.00000000    
   2.00000000    
   4.00000000    
   3.00000000    
   3.00000000    
   5.00000000    
   1.00000000    
   4.00000000    
   2.00000000    
   4.00000000    
   2.00000000    
   2.00000000    
   3.00000000    
   2.00000000    
   2.00000000    
   4.00000000    
   5.00000000    
   3.00000000    
   2.00000000    
   1.00000000    
   4.00000000    
   1.00000000    
   3.00000000    
   2.00000000    
   2.00000000    
   4.00000000    
   2.00000000    
   4.00000000    
   5.00000000    
   1.00000000    
   2.00000000    
   1.00000000    
   0.00000000    
   0.00000000    
   3.00000000    
   0.00000000    
   3.00000000    
   2.00000000    
   1.00000000    
   2.00000000    
   5.00000000    
   3.00000000    
   3.00000000    
   5.00000000    
   4.00000000    
   3.00000000    
   2.00000000    
   4.00000000    
   5.00000000    
   3.00000000    
   1.00000000    
   1.00000000    
   1.00000000    
   0.00000000    
   2.00000000    
   0.00000000    
   1.00000000    
   1.00000000    
   1.00000000    
   3.00000000    
   0.00000000    
   6.00000000    
   5.00000000    
   0.00000000    
   4.00000000    
   4.00000000    
   4.00000000    
   4.00000000    
   1.00000000    
   4.00000000    
   5.00000000    
   4.00000000    
   6.00000000    
   2.00000000    
   3.00000000    
   4.00000000    
   2.00000000    
   3.00000000    
   2.00000000    
   2.00000000    
   6.00000000    
   1.00000000    
   6.00000000    
   3.00000000    
   1.00000000    
   3.00000000    
   2.00000000    
   1.00000000    
   2.00000000    
   5.00000000    
   3.00000000    
   2.00000000    
   5.00000000    
   3.00000000    
   4.00000000    
   2.00000000    
   0.00000000    
   0.00000000    
   0.00000000    
   1.00000000    
   1.00000000    
   1.00000000    
   0.00000000    
   4.00000000    
   1.00000000    
   3.00000000    
   0.00000000    
   2.00000000    
   2.00000000    
   2.00000000    
   3.00000000    
   0.00000000    
   1.00000000    
   1.00000000    
   2.00000000    
   1.00000000    
   0.00000000    
   3.00000000    
   0.00000000    
   1.00000000    
   1.00000000    
   1.00000000    
   2.00000000    
   3.00000000    
   2.00000000    
   2.00000000    
   7.00000000    
   2.00000000    
   4.00000000    
   3.00000000    
   7.00000000    
   3.00000000    
   4.00000000    
   4.00000000    
   3.00000000    
   5.00000000    
   3.00000000    
   1.00000000    
   0.00000000    
   3.00000000    
   4.00000000    
   6.00000000    
   3.00000000    
   2.00000000    
   6.00000000    
   3.00000000    
   3.00000000    
   2.00000000    
   4.00000000    
   0.00000000    
   3.00000000    
   4.00000000    
   2.00000000    
   2.00000000    
   2.00000000    
   2.00000000    
   3.00000000    
   1.00000000    
   2.00000000    
   1.00000000    
   3.00000000    
   0.00000000    
   0.00000000    
   3.00000000    
   0.00000000    
   1.00000000    
   1.00000000    
   0.00000000    
   2.00000000    
   1.00000000    
   0.00000000    
   1.00000000    
   1.00000000    
   3.00000000    
   2.00000000    
   4.00000000    
   1.00000000    
   2.00000000    
   2.00000000    
   3.00000000    
   1.00000000    
   0.00000000    
   1.00000000    
   2.00000000    
   3.00000000    
   0.00000000    
   0.00000000    
   2.00000000    
   3.00000000    
   2.00000000    
   4.00000000    
   2.00000000    
   3.00000000    
   4.00000000    
   2.00000000    
   5.00000000    
   4.00000000    
   4.00000000    
   2.00000000    
   6.00000000    
   2.00000000    
   2.00000000    
   1.00000000    
   1.00000000    
   6.00000000    
   4.00000000    
   2.00000000    
   2.00000000    
   0.00000000    
   4.00000000    
   5.00000000    
   3.00000000    
   4.00000000    
   2.00000000    
   5.00000000    
   3.00000000    
   2.00000000    
   4.00000000    
   3.00000000    
   2.00000000    
   0.00000000    
   2.00000000    
   1.00000000    
   2.00000000    
   0.00000000    
   1.00000000    
   3.00000000    
   2.00000000    
   3.00000000    
   1.00000000    
   1.00000000    
   0.00000000    
   0.00000000    
   3.00000000    
   2.00000000    
   2.00000000    
   2.00000000    
   2.00000000    
   1.00000000    
   2.00000000    
   0.00000000    
   3.00000000    
   0.00000000    
   2.00000000    
   2.00000000    
   3.00000000    
   0.00000000    
   1.00000000    
   2.00000000    
   1.00000000    
   0.00000000    
   0.00000000    
   1.00000000    
   3.00000000    
   2.00000000    
   6.00000000    
   1.00000000    
   7.00000000    
   4.00000000    
   2.00000000    
   3.00000000    
   3.00000000    
   5.00000000    
   4.00000000    
   4.00000000    
   1.00000000    
   8.00000000    
   5.00000000    
   8.00000000    
   5.00000000    
   2.00000000    
   4.00000000    
   0.00000000    
   6.00000000    
   3.00000000    
   4.00000000    
   3.00000000    
   1.00000000    
   2.00000000    
   2.00000000    
   2.00000000    
   2.00000000    
   1.00000000    
   2.00000000    
   1.00000000    
   2.00000000    
   3.00000000    
   1.00000000    
   3.00000000    
   1.00000000    
   0.00000000    
   3.00000000    
   0.00000000    
   3.00000000    
   4.00000000    
   1.00000000    
   0.00000000    
   1.00000000    
   3.00000000    
   1.00000000    
   2.00000000    
   6.00000000    
   2.00000000    
   2.00000000    
   0.00000000    
   1.00000000    
   0.00000000    
   2.00000000    
   4.00000000    
   1.00000000    
   3.00000000    
   2.00000000    
   1.00000000    
   0.00000000    
   1.00000000    
   1.00000000    
   2.00000000    
   1.00000000    
   4.00000000    
   4.00000000    
   2.00000000    
   2.00000000    
   4.00000000    
   8.00000000    
   4.00000000    
   3.00000000    
   3.00000000    
   5.00000000    
   6.00000000    
   2.00000000    
   1.00000000    
   4.00000000    
   3.00000000    
   0.00000000    
   8.00000000    
   2.00000000    
   1.00000000    
   2.00000000    
   3.00000000    
   2.00000000    
   2.00000000    
   3.00000000    
   1.00000000    
   1.00000000    
   1.00000000    
   1.00000000    
   3.00000000    
   1.00000000    
   3.00000000    
   1.00000000    
   2.00000000    
   1.00000000    
   2.00000000    
   1.00000000    
   1.00000000    
   1.00000000    
   3.00000000    
   0.00000000    
   1.00000000    
   2.00000000    
   3.00000000    
   1.00000000    
   5.00000000    
   0.00000000    
   4.00000000    
   0.00000000    
   0.00000000    
   3.00000000    
   0.00000000    
   2.00000000    
   2.00000000    
   3.00000000    
   2.00000000    
   2.00000000    
   0.00000000    
   1.00000000    
   0.00000000    
   1.00000000    
   0.00000000    
   1.00000000    
   1.00000000    
   2.00000000    
   2.00000000    
   4.00000000    
   5.00000000    
   1.00000000    
   3.00000000    
   5.00000000    
   2.00000000    
   1.00000000    
   1.00000000    
   5.00000000    
   4.00000000    
   5.00000000    
   3.00000000    
   2.00000000    
   4.00000000    
   2.00000000    
   3.00000000    
   5.00000000    
   2.00000000    
   3.00000000    
   2.00000000    
   4.00000000    
   2.00000000    
   1.00000000    
   3.00000000    
   1.00000000    
   4.00000000    
   1.00000000    
   1.00000000    
   1.00000000    
   1.00000000    
   2.00000000    
   1.00000000    
   3.00000000    
   1.00000000    
   0.00000000    
   1.00000000    
   1.00000000    
   4.00000000    
   1.00000000    
   4.00000000    
   3.00000000    
   3.00000000    
   2.00000000    
   2.00000000    
   2.00000000    
   1.00000000    
   1.00000000    
   0.00000000    
   2.00000000    
   2.00000000    
   1.00000000    
   3.00000000    
   2.00000000    
   1.00000000    
   1.00000000    
   1.00000000    
   2.00000000    
   0.00000000    
   3.00000000    
   0.00000000    
   2.00000000    
   1.00000000    
   4.00000000    
   3.00000000    
   2.00000000    
   1.00000000    
   1.00000000    
   3.00000000    
   1.00000000    
   2.00000000    
   2.00000000    
   3.00000000    
   1.00000000    
   2.00000000    
   2.00000000    
   3.00000000    
   6.00000000    
   1.00000000    
   2.00000000    
   5.00000000    
   7.00000000    
   4.00000000    
   1.00000000    
   1.00000000    
   6.00000000    
   4.00000000    
   1.00000000    
   1.00000000    
   0.00000000    
   4.00000000    
   0.00000000    
   2.00000000    
   1.00000000    
   1.00000000    
   2.00000000    
   1.00000000    
   1.00000000    
   2.00000000    
   4.00000000    
   0.00000000    
   0.00000000    
   1.00000000    
   2.00000000    
   3.00000000    
   4.00000000    
   0.00000000    
   2.00000000    
   1.00000000    
   0.00000000    
   1.00000000    
   0.00000000    
   1.00000000    
   1.00000000    
   2.00000000    
   3.00000000    
   1.00000000    
   1.00000000    
   1.00000000    
   2.00000000    
   2.00000000    
   1.00000000    
   0.00000000    
   3.00000000    
   0.00000000    
   3.00000000    
   0.00000000    
   2.00000000    
   1.00000000    
   6.00000000    
   4.00000000    
   2.00000000    
   7.00000000    
   2.00000000    
   1.00000000    
   2.00000000    
   1.00000000    
   1.00000000    
   4.00000000    
   1.00000000    
   2.00000000    
   4.00000000    
   3.00000000    
   6.00000000    
   6.00000000    
   6.00000000    
   3.00000000    
   2.00000000    
   2.00000000    
   0.00000000    
   2.00000000    
   2.00000000    
   0.00000000    
   1.00000000    
   3.00000000    
   2.00000000    
   1.00000000    
   1.00000000    
   1.00000000    
   0.00000000    
   2.00000000    
   0.00000000    
   5.00000000    
   1.00000000    
   2.00000000    
   0.00000000    
   0.00000000    
   3.00000000    
   3.00000000    
   0.00000000    
   0.00000000    
   0.00000000    
   1.00000000    
   0.00000000    
   3.00000000    
   1.00000000    
   5.00000000    
   1.00000000    
   1.00000000    
   2.00000000    
   1.00000000    
   1.00000000    
   1.00000000    
   2.00000000    
   2.00000000    
   3.00000000    
   0.00000000    
   0.00000000    
   0.00000000    
   1.00000000    
   3.00000000    
   1.00000000    
   5.00000000    
   2.00000000    
   1.00000000    
   0.00000000    
   1.00000000    
   3.00000000    
   2.00000000    
   0.00000000    
   3.00000000    
   3.00000000    
   2.00000000    
   7.00000000    
   3.00000000    
   4.00000000    
   5.00000000    
   1.00000000    
   0.00000000    
   3.00000000    
   2.00000000    
   2.00000000    
   2.00000000    
   1.00000000    
   2.00000000    
   1.00000000    
   2.00000000    
   1.00000000    
   2.00000000    
   1.00000000    
   0.00000000    
   1.00000000    
   3.00000000    
   2.00000000    
   0.00000000    
   3.00000000    
   3.00000000    
   3.00000000    
   1.00000000    
   3.00000000    
   1.00000000    
   1.00000000    
   2.00000000    
   2.00000000    
   0.00000000    
   2.00000000    
   2.00000000    
   1.00000000    
   3.00000000    
   3.00000000    
   2.00000000    
   3.00000000    
   0.00000000    
   3.00000000    
   0.00000000    
   0.00000000    
   2.00000000    
   2.00000000    
   1.00000000    
   2.00000000    
   4.00000000    
   0.00000000    
   0.00000000    
   0.00000000    
   0.00000000    
   1.00000000    
   4.00000000    
   2.00000000    
   3.00000000    
   1.00000000    
   5.00000000    
   0.00000000    
   6.00000000    
   4.00000000    
   4.00000000    
   4.00000000    
   1.00000000    
   4.00000000    
   2.00000000    
   2.00000000    
   3.00000000    
   3.00000000    
   1.00000000    
   5.00000000    
   1.00000000    
   5.00000000    
   4.00000000    
   4.00000000    
   5.00000000    
   6.00000000    
   3.00000000    
   3.00000000    
   1.00000000    
   3.00000000    
   2.00000000    
   2.00000000    
   0.00000000    
   2.00000000    
   0.00000000    
   0.00000000    
   3.00000000    
   0.00000000    
   0.00000000    
   2.00000000    
   3.00000000    
   5.00000000    
   2.00000000    
   1.00000000    
   1.00000000    
   2.00000000    
   4.00000000    
   1.00000000    
   3.00000000    
   2.00000000    
   0.00000000    
   1.00000000    
   2.00000000    
   3.00000000    
   7.00000000    
   0.00000000    
   1.00000000    
   5.00000000    
   4.00000000    
   2.00000000    
   4.00000000    
   0.00000000    
   2.00000000    
   0.00000000    
   2.00000000    
   0.00000000    
   2.00000000    
   2.00000000    
   1.00000000    
   1.00000000    
   1.00000000    
   1.00000000    
   0.00000000    
   1.00000000    
   0.00000000    
   0.00000000    
   4.00000000    
   1.00000000    
   4.00000000    
   6.00000000    
   2.00000000    
   4.00000000    
   0.00000000    
   2.00000000    
   2.00000000    
   6.00000000    
   4.00000000    
   3.00000000    
   3.00000000    
   4.00000000    
   4.00000000    
   4.00000000    
   0.00000000    
   1.00000000    
   3.00000000    
   3.00000000    
   2.00000000    
   2.00000000    
   0.00000000    
   2.00000000    
   5.00000000    
   2.00000000    
   1.00000000    
   2.00000000    
   1.00000000    
   0.00000000    
   2.00000000    
   0.00000000    
   0.00000000    
   1.00000000    
   1.00000000    
   0.00000000    
   4.00000000    
   1.00000000    
   2.00000000    
   1.00000000    
   2.00000000    
   2.00000000    
   6.00000000    
   2.00000000    
   4.00000000    
   2.00000000    
   1.00000000    
   0.00000000    
   1.00000000    
   2.00000000    
   0.00000000    
   2.00000000    
   3.00000000    
   3.00000000    
   3.00000000    
   0.00000000    
   5.00000000    
   4.00000000    
   1.00000000    
   3.00000000    
   7.00000000    
   1.00000000    
   5.00000000    
   2.00000000    
   1.00000000    
   1.00000000    
   0.00000000    
   5.00000000    
   5.00000000    
   3.00000000    
   4.00000000    
   4.00000000    
   5.00000000    
   3.00000000    
   2.00000000    
   4.00000000    
   1.00000000    
   3.00000000    
   2.00000000    
   1.00000000    
   4.00000000    
   1.00000000    
   1.00000000    
   2.00000000    
   2.00000000    
   1.00000000    
   3.00000000    
   3.00000000    
   4.00000000    
   2.00000000    
   1.00000000    
   2.00000000    
   2.00000000    
   4.00000000    
   1.00000000    
   1.00000000    
   3.00000000    
   3.00000000    
   3.00000000    
   4.00000000    
   2.00000000    
   3.00000000    
   0.00000000    
   2.00000000    
   1.00000000    
   0.00000000    
   3.00000000    
   2.00000000    
   1.00000000    
   4.00000000    
   3.00000000    
   3.00000000    
   3.00000000    
   2.00000000    
   0.00000000    
   1.00000000    
   1.00000000    
   1.00000000    
   3.00000000    
   0.00000000    
   0.00000000    
   4.00000000    
   3.00000000    
   0.00000000    
   2.00000000    
   2.00000000    
   1.00000000    
   2.00000000    
   4.00000000    
   2.00000000    
   1.00000000    
   4.00000000    
   5.00000000    
   3.00000000    
   2.00000000    
   4.00000000    
   1.00000000    
   6.00000000    
   6.00000000    
   4.00000000    
   3.00000000    
   2.00000000    
   3.00000000    
   4.00000000    
   2.00000000    
   1.00000000    
   1.00000000    
   2.00000000    
   3.00000000    
   1.00000000    
   1.00000000    
   3.00000000    
   3.00000000    
   2.00000000    
   3.00000000    
   2.00000000    
   6.00000000    
   0.00000000    
   1.00000000    
   0.00000000    
   1.00000000    
   3.00000000    
   2.00000000    
   1.00000000    
   3.00000000    
   0.00000000    
   2.00000000    
   2.00000000    
   0.00000000    
   3.00000000    
   5.00000000    
   2.00000000    
   2.00000000    
   1.00000000    
   4.00000000    
   2.00000000    
   1.00000000    
   0.00000000    
   0.00000000    
   2.00000000    
   3.00000000    
   3.00000000    
   1.00000000    
   0.00000000    
   1.00000000    
   2.00000000    
   0.00000000    
   2.00000000    
   1.00000000    
   1.00000000    
   1.00000000    
   5.00000000    
   1.00000000    
   3.00000000    
   1.00000000    
   1.00000000    
   2.00000000    
   3.00000000    
   4.00000000    
   3.00000000    
   5.00000000    
   3.00000000    
   5.00000000    
   6.00000000    
   3.00000000    
   3.00000000    
   3.00000000    
   3.00000000    
   0.00000000    
   3.00000000    
   4.00000000    
   2.00000000    
   1.00000000    
   0.00000000    
   2.00000000    
   3.00000000    
   2.00000000    
   3.00000000    
   2.00000000    
   1.00000000    
   2.00000000    
   0.00000000    
   0.00000000    
   1.00000000    
   5.00000000    
   2.00000000    
   0.00000000    
   2.00000000    
   0.00000000    
   2.00000000    
   0.00000000    
   2.00000000    
   2.00000000    
   3.00000000    
   6.00000000    
   3.00000000    
   0.00000000    
   5.00000000    
   3.00000000    
   2.00000000    
   0.00000000    
   2.00000000    
   0.00000000    
   0.00000000    
   2.00000000    
   2.00000000    
   0.00000000    
   0.00000000    
   3.00000000    
   2.00000000    
   2.00000000    
   1.00000000    
   1.00000000    
   0.00000000    
   4.00000000    
   2.00000000    
   3.00000000    
   4.00000000    
   2.00000000    
   3.00000000    
   3.00000000    
   1.00000000    
   3.00000000    
   5.00000000    
   3.00000000    
   2.00000000    
   3.00000000    
   4.00000000    
   2.00000000    
   3.00000000    
   1.00000000    
   2.00000000    
   2.00000000    
   2.00000000    
   1.00000000    
   3.00000000    
   4.00000000    
   0.00000000    
   2.00000000    
   2.00000000    
   4.00000000    
   0.00000000    
   4.00000000    
   2.00000000    
   2.00000000    
   3.00000000    
   2.00000000    
   1.00000000    
   1.00000000    
   3.00000000    
   1.00000000    
   1.00000000    
   2.00000000    
   2.00000000    
   2.00000000    
   0.00000000    
   4.00000000    
   0.00000000    
   3.00000000    
   4.00000000    
   0.00000000    
   2.00000000    
   3.00000000    
   1.00000000    
   0.00000000    
   0.00000000    
   2.00000000    
   2.00000000    
   3.00000000    
   1.00000000    
   0.00000000    
   2.00000000    
   1.00000000    
   3.00000000    
   1.00000000    
   1.00000000    
   1.00000000    
   1.00000000    
   2.00000000    
   4.00000000    
   2.00000000    
   2.00000000    
   4.00000000    
   5.00000000    
   2.00000000    
   8.00000000    
   2.00000000    
   2.00000000    
   3.00000000    
   4.00000000    
   0.00000000    
   5.00000000    
   3.00000000    
   8.00000000    
   2.00000000    
   0.00000000    
   5.00000000    
   4.00000000    
   1.00000000    
   1.00000000    
   2.00000000    
   3.00000000    
   3.00000000    
   4.00000000    
   5.00000000    
   1.00000000    
   1.00000000    
   0.00000000    
   0.00000000    
   0.00000000    
   2.00000000    
   2.00000000    
   1.00000000    
   0.00000000    
   2.00000000    
   2.00000000    
   1.00000000    
   0.00000000    
   2.00000000    
   4.00000000    
   0.00000000    
   1.00000000    
   1.00000000    
   0.00000000    
   5.00000000    
   0.00000000    
   3.00000000    
   1.00000000    
   1.00000000    
   1.00000000    
   0.00000000    
   2.00000000    
   0.00000000    
   0.00000000    
   1.00000000    
   0.00000000    
   1.00000000    
   0.00000000    
   1.00000000    
   2.00000000    
   1.00000000    
   1.00000000    
   1.00000000    
   1.00000000    
   1.00000000    
   1.00000000    
   3.00000000    
   2.00000000    
   4.00000000    
   6.00000000    
   1.00000000    
   4.00000000    
   3.00000000    
   2.00000000    
   6.00000000    
   9.00000000    
   6.00000000    
   3.00000000    
   6.00000000    
   4.00000000    
   2.00000000    
   3.00000000    
   4.00000000    
   1.00000000    
   0.00000000    
   1.00000000    
   1.00000000    
   3.00000000    
   3.00000000    
   1.00000000    
   2.00000000    
   3.00000000    
   1.00000000    
   2.00000000    
   1.00000000    
   3.00000000    
   2.00000000    
   3.00000000    
   3.00000000    
   2.00000000    
   0.00000000    
   3.00000000    
   3.00000000    
   0.00000000    
   1.00000000    
   0.00000000    
   2.00000000    
   4.00000000    
   2.00000000    
   3.00000000    
   4.00000000    
   3.00000000    
   2.00000000    
   1.00000000    
   4.00000000    
   0.00000000    
   1.00000000    
   3.00000000    
   3.00000000    
   2.00000000    
   1.00000000    
   2.00000000    
   1.00000000    
   1.00000000    
   3.00000000    
   1.00000000    
   2.00000000    
   6.00000000    
   6.00000000    
   3.00000000    
   1.00000000    
   0.00000000    
   1.00000000    
   1.00000000    
   4.00000000    
   2.00000000    
   5.00000000    
   7.00000000    
   8.00000000    
   3.00000000    
   1.00000000    
   3.00000000    
   3.00000000    
   3.00000000    
   2.00000000    
   3.00000000    
   2.00000000    
   4.00000000    
   1.00000000    
   2.00000000    
   3.00000000    
   0.00000000    
   1.00000000    
   2.00000000    
   2.00000000    
   0.00000000    
   0.00000000    
   2.00000000    
   3.00000000    
   1.00000000    
   1.00000000    
   0.00000000    
   7.00000000    
   6.00000000    
   3.00000000    
   5.00000000    
   6.00000000    
   3.00000000    
   1.00000000    
   2.00000000    
   2.00000000    
   3.00000000    
   3.00000000    
   6.00000000    
   4.00000000    
   3.00000000    
   1.00000000    
   0.00000000    
   2.00000000    
   3.00000000    
   0.00000000    
   1.00000000    
   1.00000000    
   0.00000000    
   3.00000000    
   1.00000000    
   5.00000000    
   5.00000000    
   2.00000000    
   2.00000000    
   2.00000000    
   1.00000000    
   7.00000000    
   3.00000000    
   0.00000000    
   0.00000000    
   2.00000000    
   2.00000000    
   7.00000000    
   3.00000000    
   8.00000000    
   3.00000000    
   4.00000000    
   3.00000000    
   4.00000000    
   2.00000000    
   3.00000000    
   3.00000000    
   1.00000000    
   0.00000000    
   0.00000000    
   2.00000000    
   1.00000000    
   1.00000000    
   1.00000000    
   2.00000000    
   1.00000000    
   1.00000000    
   3.00000000    
   2.00000000    
   2.00000000    
   3.00000000    
   2.00000000    
   1.00000000    
   1.00000000    
   0.00000000    
   0.00000000    
   2.00000000    
   2.00000000    
   2.00000000    
   3.00000000    
   4.00000000    
   0.00000000    
   4.00000000    
   3.00000000    
   4.00000000    
   3.00000000    
   3.00000000    
   4.00000000    
   6.00000000    
   2.00000000    
   1.00000000    
   1.00000000    
   1.00000000    
   0.00000000    
   2.00000000    
   1.00000000    
   2.00000000    
   1.00000000    
   4.00000000    
   5.00000000    
   2.00000000    
   3.00000000    
   2.00000000    
   1.00000000    
   3.00000000    
   2.00000000    
   1.00000000    
   2.00000000    
   3.00000000    
   4.00000000    
   1.00000000    
   3.00000000    
   1.00000000    
   7.00000000    
   8.00000000    
   4.00000000    
   5.00000000    
   3.00000000    
   2.00000000    
   1.00000000    
   1.00000000    
   1.00000000    
   0.00000000    
   1.00000000    
   3.00000000    
   2.00000000    
   3.00000000    
   2.00000000    
   1.00000000    
   1.00000000    
   0.00000000    
   1.00000000    
   2.00000000    
   4.00000000    
   2.00000000    
   1.00000000    
   1.00000000    
   1.00000000    
   2.00000000    
   1.00000000    
   4.00000000    
   1.00000000    
   2.00000000    
   0.00000000    
   0.00000000    
   5.00000000    
   2.00000000    
   3.00000000    
   3.00000000    
   2.00000000    
   3.00000000    
   4.00000000    
   3.00000000    
   1.00000000    
   1.00000000    
   0.00000000    
   0.00000000    
   0.00000000    
   1.00000000    
   1.00000000    
   0.00000000    
   5.00000000    
   2.00000000    
   4.00000000    
   4.00000000    
   2.00000000    
   1.00000000    
   2.00000000    
   0.00000000    
   2.00000000    
   5.00000000    
   3.00000000    
   5.00000000    
   2.00000000    
   3.00000000    
   2.00000000    
   2.00000000    
   5.00000000    
   3.00000000    
   5.00000000    
   7.00000000    
   4.00000000    
   2.00000000    
   5.00000000    
   3.00000000    
   4.00000000    
   2.00000000    
   2.00000000    
   4.00000000    
   3.00000000    
   2.00000000    
   1.00000000    
   4.00000000    
   0.00000000    
   3.00000000    
   0.00000000    
   3.00000000    
   1.00000000    
   2.00000000    
   1.00000000    
   2.00000000    
   2.00000000    
   2.00000000    
   5.00000000    
   2.00000000    
   4.00000000    
   1.00000000    
   5.00000000    
   2.00000000    
   0.00000000    
   3.00000000    
   6.00000000    
   3.00000000    
   3.00000000    
   0.00000000    
   3.00000000    
   2.00000000    
   3.00000000    
   1.00000000    
   2.00000000    
   4.00000000    
   1.00000000    
   3.00000000    
   2.00000000    
   0.00000000    
   5.00000000    
   1.00000000    
   2.00000000    
   0.00000000    
   0.00000000    
   2.00000000    
   0.00000000    
   1.00000000    
   3.00000000    
   2.00000000    
   3.00000000    
   0.00000000    
   1.00000000    
   4.00000000    
   2.00000000    
   4.00000000    
   4.00000000    
   8.00000000    
   1.00000000    
   3.00000000    
   2.00000000    
   1.00000000    
   4.00000000    
   1.00000000    
   2.00000000    
   0.00000000    
   1.00000000    
   1.00000000    
   2.00000000    
   2.00000000    
   1.00000000    
   2.00000000    
   2.00000000    
   0.00000000    
   1.00000000    
   0.00000000    
   3.00000000    
   0.00000000    
   1.00000000    
   2.00000000    
   2.00000000    
   1.00000000    
   4.00000000    
   1.00000000    
   3.00000000    
   4.00000000    
   3.00000000    
   3.00000000    
   3.00000000    
   4.00000000    
   4.00000000    
   4.00000000    
   4.00000000    
   3.00000000    
   4.00000000    
   2.00000000    
   2.00000000    
   1.00000000    
   0.00000000    
   1.00000000    
   1.00000000    
   2.00000000    
   2.00000000    
   4.00000000    
   3.00000000    
   3.00000000    
   5.00000000    
   2.00000000    
   1.00000000    
   1.00000000    
   1.00000000    
   1.00000000    
   0.00000000    
   2.00000000    
   1.00000000    
   0.00000000    
   0.00000000    
   1.00000000    
   2.00000000    
   1.00000000    
   1.00000000    
   4.00000000    
   3.00000000    
   0.00000000    
   1.00000000    
   3.00000000    
   1.00000000    
   1.00000000    
   1.00000000    
   1.00000000    
   1.00000000    
   2.00000000    
   0.00000000    
   0.00000000    
   1.00000000    
   1.00000000    
   0.00000000    
   1.00000000    
   2.00000000    
   1.00000000    
   2.00000000    
   1.00000000    
   2.00000000    
   1.00000000    
   3.00000000    
   2.00000000    
   2.00000000    
   0.00000000    
   3.00000000    
   2.00000000    
   2.00000000    
   1.00000000    
   1.00000000    
   3.00000000    
   3.00000000    
   6.00000000    
   3.00000000    
   2.00000000    
   2.00000000    
   6.00000000    
   1.00000000    
   2.00000000    
   3.00000000    
   2.00000000    
   3.00000000    
   1.00000000    
   3.00000000    
   0.00000000    
   2.00000000    
   3.00000000    
   0.00000000    
   4.00000000    
   1.00000000    
   2.00000000    
   0.00000000    
   3.00000000    
   2.00000000    
   1.00000000    
   0.00000000    
   0.00000000    
   2.00000000    
   0.00000000    
   1.00000000    
   2.00000000    
   1.00000000    
   1.00000000    
   1.00000000    
   1.00000000    
   2.00000000    
   0.00000000    
   1.00000000    
   6.00000000    
   1.00000000    
   1.00000000    
   0.00000000    
   2.00000000    
   3.00000000    
   2.00000000    
   1.00000000    
   1.00000000    
   1.00000000    
   1.00000000    
   3.00000000    
   2.00000000    
   1.00000000    
   0.00000000    
   0.00000000    
   0.00000000    
   0.00000000    
   4.00000000    
   4.00000000    
   1.00000000    
   3.00000000    
   1.00000000    
   0.00000000    
   0.00000000    
   1.00000000    
   2.00000000    
   1.00000000    
   2.00000000    
   1.00000000    
   3.00000000    
   2.00000000    
   1.00000000    
   6.00000000    
   0.00000000    
   1.00000000    
   2.00000000    
   5.00000000    
   1.00000000    
   2.00000000    
   0.00000000    
   2.00000000    
   2.00000000    
   0.00000000    
   0.00000000    
   1.00000000    
   3.00000000    
   0.00000000    
   0.00000000    
   2.00000000    
   2.00000000    
   2.00000000    
   1.00000000    
   1.00000000    
   1.00000000    
   2.00000000    
   0.00000000    
   1.00000000    
   2.00000000    
   1.00000000    
   2.00000000    
   1.00000000    
   1.00000000    
   0.00000000    
   1.00000000    
   1.00000000    
   0.00000000    
   1.00000000    
   1.00000000    
   0.00000000    
   2.00000000    
   0.00000000    
   1.00000000    
   1.00000000    
   1.00000000    
   0.00000000    
   1.00000000    
   0.00000000    
   1.00000000    
   3.00000000    
   3.00000000    
   0.00000000    
   0.00000000    
   0.00000000    
   2.00000000    
   2.00000000    
   0.00000000    
   2.00000000    
   0.00000000    
   1.00000000    
   1.00000000    
   0.00000000    
   1.00000000    
   1.00000000    
   1.00000000    
   1.00000000    
   2.00000000    
   0.00000000    
   0.00000000    
   2.00000000    
   2.00000000    
   1.00000000    
   2.00000000    
   1.00000000    
   0.00000000    
   1.00000000    
   0.00000000    
   5.00000000    
   0.00000000    
   2.00000000    
   0.00000000    
   0.00000000    
   2.00000000    
   1.00000000    
   0.00000000    
   0.00000000    
   0.00000000    
   1.00000000    
   2.00000000    
   2.00000000    
   2.00000000    
   0.00000000    
   0.00000000    
   2.00000000    
   0.00000000    
   1.00000000    
   1.00000000    
   0.00000000    
   1.00000000    
   0.00000000    
   0.00000000    
   2.00000000    
   1.00000000    
   1.00000000    
   0.00000000    
   0.00000000    
   0.00000000    
   1.00000000    
   2.00000000    
   0.00000000    
   0.00000000    
   1.00000000    
   0.00000000    
   0.00000000    
   0.00000000    
   0.00000000    
   0.00000000    
   2.00000000    
   0.00000000    
   0.00000000    
   0.00000000    
   0.00000000    
   2.00000000    
   0.00000000    
   4.00000000    
   2.00000000    
   1.00000000    
   0.00000000    
   2.00000000    
   0.00000000    
   3.00000000    
   1.00000000    
   2.00000000    
   0.00000000    
   0.00000000    
   0.00000000    
   3.00000000    
   1.00000000    
   3.00000000    
   2.00000000    
   3.00000000    
   2.00000000    
   2.00000000    
   1.00000000    
   3.00000000    
   0.00000000    
   2.00000000    
   4.00000000    
   3.00000000    
   4.00000000    
   0.00000000    
   5.00000000    
   3.00000000    
   2.00000000    
   3.00000000    
   2.00000000    
   1.00000000    
   0.00000000    
   2.00000000    
   1.00000000    
   1.00000000    
   4.00000000    
   3.00000000    
   1.00000000    
   4.00000000    
   0.00000000    
   1.00000000    
   2.00000000    
   0.00000000    
   3.00000000    
   1.00000000    
   3.00000000    
   1.00000000    
   1.00000000    
   0.00000000    
   0.00000000    
   3.00000000    
   3.00000000    
   1.00000000    
   0.00000000    
   0.00000000    
   1.00000000    
   1.00000000    
   1.00000000    
   0.00000000    
   3.00000000    
   1.00000000    
   5.00000000    
   0.00000000    
   0.00000000    
   1.00000000    
   2.00000000    
   1.00000000    
   0.00000000    
   3.00000000    
   3.00000000    
   6.00000000    
   2.00000000    
   0.00000000    
   8.00000000    
   7.00000000    
   1.00000000    
   3.00000000    
   0.00000000    
   5.00000000    
   7.00000000    
   1.00000000    
   2.00000000    
   0.00000000    
   2.00000000    
   2.00000000    
   2.00000000    
   2.00000000    
   4.00000000    
   7.00000000    
   4.00000000    
   1.00000000    
   6.00000000    
   4.00000000    
   2.00000000    
   4.00000000    
   2.00000000    
   2.00000000    
   3.00000000    
   1.00000000    
   0.00000000    
   1.00000000    
   1.00000000    
   7.00000000    
   1.00000000    
   2.00000000    
   3.00000000    
   3.00000000    
   6.00000000    
   1.00000000    
   2.00000000    
   3.00000000    
   3.00000000    
   3.00000000    
   3.00000000    
   3.00000000    
   3.00000000    
   3.00000000    
   1.00000000    
   2.00000000    
   3.00000000    
   1.00000000    
   2.00000000    
   1.00000000    
   2.00000000    
   4.00000000    
   0.00000000    
   2.00000000    
   2.00000000    
   1.00000000    
   2.00000000    
   3.00000000    
   2.00000000    
   3.00000000    
   0.00000000    
   2.00000000    
   2.00000000    
   3.00000000    
   7.00000000    
   2.00000000    
   5.00000000    
   4.00000000    
   4.00000000    
   2.00000000    
   0.00000000    
   4.00000000    
   5.00000000    
   2.00000000    
   1.00000000    
   3.00000000    
   2.00000000    
   3.00000000    
   3.00000000    
   6.00000000    
   3.00000000    
   3.00000000    
   6.00000000    
   1.00000000    
   1.00000000    
   2.00000000    
   4.00000000    
   2.00000000    
   2.00000000    
   2.00000000    
   3.00000000    
   1.00000000    
   4.00000000    
   4.00000000    
   3.00000000    
   2.00000000    
   0.00000000    
   1.00000000    
   1.00000000    
   3.00000000    
   4.00000000    
   0.00000000    
   2.00000000    
   2.00000000    
   3.00000000    
   3.00000000    
   1.00000000    
   4.00000000    
   2.00000000    
   4.00000000    
   1.00000000    
   2.00000000    
   4.00000000    
   0.00000000    
   0.00000000    
   2.00000000    
   2.00000000    
   2.00000000    
   1.00000000    
   1.00000000    
   2.00000000    
   3.00000000    
   2.00000000    
   2.00000000    
   2.00000000    
   1.00000000    
   2.00000000    
   1.00000000    
   1.00000000    
   5.00000000    
   2.00000000    
   5.00000000    
   4.00000000    
   3.00000000    
   2.00000000    
   5.00000000    
   4.00000000    
   3.00000000    
   4.00000000    
   2.00000000    
   3.00000000    
   7.00000000    
   4.00000000    
   8.00000000    
   3.00000000    
   2.00000000    
   2.00000000    
   1.00000000    
   3.00000000    
   0.00000000    
   2.00000000    
   1.00000000    
   3.00000000    
   3.00000000    
   8.00000000    
   1.00000000    
   0.00000000    
   0.00000000    
   5.00000000    
   5.00000000    
   5.00000000    
   2.00000000    
   1.00000000    
   7.00000000    
   4.00000000    
   1.00000000    
   5.00000000    
   4.00000000    
   1.00000000    
   1.00000000    
   2.00000000    
   1.00000000    
   0.00000000    
   1.00000000    
   2.00000000    
   1.00000000    
   2.00000000    
   3.00000000    
   1.00000000    
   1.00000000    
   0.00000000    
   0.00000000    
   4.00000000    
   1.00000000    
   1.00000000    
   4.00000000    
   0.00000000    
   3.00000000    
   4.00000000    
   2.00000000    
   2.00000000    
   3.00000000    
   3.00000000    
   4.00000000    
   5.00000000    
   8.00000000    
   2.00000000    
   2.00000000    
   4.00000000    
   2.00000000    
   7.00000000    
   2.00000000    
   4.00000000    
   3.00000000    
   2.00000000    
   3.00000000    
   3.00000000    
   3.00000000    
   3.00000000    
   1.00000000    
   2.00000000    
   3.00000000    
   3.00000000    
   3.00000000    
   5.00000000    
   7.00000000    
   2.00000000    
   4.00000000    
   0.00000000    
   2.00000000    
   4.00000000    
   4.00000000    
   2.00000000    
   4.00000000    
   5.00000000    
   1.00000000    
   1.00000000    
   3.00000000    
   4.00000000    
   4.00000000    
   4.00000000    
   3.00000000    
   1.00000000    
   2.00000000    
   5.00000000    
   1.00000000    
   4.00000000    
   1.00000000    
   3.00000000    
   1.00000000    
   5.00000000    
   0.00000000    
   1.00000000    
   3.00000000    
   1.00000000    
   1.00000000    
   1.00000000    
   3.00000000    
   1.00000000    
   5.00000000    
   5.00000000    
   3.00000000    
   2.00000000    
   2.00000000    
   1.00000000    
   2.00000000    
   0.00000000    
   4.00000000    
   4.00000000    
   2.00000000    
   6.00000000    
   8.00000000    
   10.0000000    
   4.00000000    
   2.00000000    
   2.00000000    
   4.00000000    
   2.00000000    
   4.00000000    
   2.00000000    
   8.00000000    
   4.00000000    
   6.00000000    
   2.00000000    
   8.00000000    
   4.00000000    
   6.00000000    
   4.00000000    
   2.00000000    
   2.00000000    
   4.00000000    
   0.00000000    
   2.00000000    
   0.00000000    
   0.00000000    
   0.00000000    
   6.00000000    
   4.00000000    
   0.00000000    
   4.00000000    
   0.00000000    
   4.00000000    
   2.00000000    
   2.00000000    
   4.00000000    
   6.00000000    
   2.00000000    
   2.00000000    
   0.00000000    
   2.00000000    
   0.00000000    
   2.00000000    
   4.00000000    
   4.00000000    
   2.00000000    
   0.00000000    
   0.00000000    
   2.00000000    
   2.00000000    
   2.00000000    
   6.00000000    
   6.00000000    
   0.00000000    
   2.00000000    
   2.00000000    
   0.00000000    
   6.00000000    
   4.00000000    
   0.00000000    
   3.00000000    
   5.00000000    
   2.00000000    
   3.00000000    
   2.00000000    
   8.00000000    
   10.0000000    
   4.00000000    
   5.00000000    
   8.00000000    
   2.00000000    
   1.00000000    
   2.00000000    
   8.00000000    
   6.00000000    
   1.00000000    
   3.00000000    
   4.00000000    
   3.00000000    
   3.00000000    
   4.00000000    
   8.00000000    
   7.00000000    
   5.00000000    
   4.00000000    
   3.00000000    
   4.00000000    
   5.00000000    
   2.00000000    
   6.00000000    
   3.00000000    
   3.00000000    
   6.00000000    
   1.00000000    
   4.00000000    
   4.00000000    
   3.00000000    
   7.00000000    
   3.00000000    
   3.00000000    
   1.00000000    
   5.00000000    
   3.00000000    
   2.00000000    
   4.00000000    
   3.00000000    
   2.00000000    
   5.00000000    
   5.00000000    
   2.00000000    
   0.00000000    
   2.00000000    
   0.00000000    
   2.00000000    
   1.00000000    
   4.00000000    
   4.00000000    
   2.00000000    
   2.00000000    
   0.00000000    
   2.00000000    
   1.00000000    
   0.00000000    
   1.00000000    
   2.00000000    
   7.00000000    
   0.00000000    
   2.00000000    
   4.00000000    
   10.0000000    
   4.00000000    
   4.00000000    
   5.00000000    
   2.00000000    
   2.00000000    
   4.00000000    
   2.00000000    
   5.00000000    
   3.00000000    
   7.00000000    
   1.00000000    
   3.00000000    
   3.00000000    
   6.00000000    
   4.00000000    
   6.00000000    
   8.00000000    
   2.00000000    
   5.00000000    
   4.00000000    
   2.00000000    
   3.00000000    
   1.00000000    
   2.00000000    
   4.00000000    
   1.00000000    
   5.00000000    
   3.00000000    
   4.00000000    
   3.00000000    
   5.00000000    
   3.00000000    
   5.00000000    
   3.00000000    
   2.00000000    
   4.00000000    
   2.00000000    
   3.00000000    
   4.00000000    
   2.00000000    
   2.00000000    
   2.00000000    
   1.00000000    
   0.00000000    
   2.00000000    
   3.00000000    
   0.00000000    
   2.00000000    
   0.00000000    
   1.00000000    
   2.00000000    
   2.00000000    
   4.00000000    
   3.00000000    
   2.00000000    
   3.00000000    
   2.00000000    
   1.00000000    
   2.00000000    
   1.00000000    
   4.00000000    
   5.00000000    
   2.00000000    
   4.00000000    
   5.00000000    
   5.00000000    
   4.00000000    
   1.00000000    
   1.00000000    
   4.00000000    
   4.00000000    
   5.00000000    
   8.00000000    
   3.00000000    
   1.00000000    
   5.00000000    
   2.00000000    
   9.00000000    
   5.00000000    
   1.00000000    
   7.00000000    
   6.00000000    
   3.00000000    
   1.00000000    
   5.00000000    
   4.00000000    
   4.00000000    
   4.00000000    
   5.00000000    
   5.00000000    
   0.00000000    
   8.00000000    
   2.00000000    
   5.00000000    
   4.00000000    
   2.00000000    
   8.00000000    
   6.00000000    
   2.00000000    
   5.00000000    
   2.00000000    
   5.00000000    
   1.00000000    
   2.00000000    
   3.00000000    
   4.00000000    
   1.00000000    
   4.00000000    
   6.00000000    
   2.00000000    
   3.00000000    
   1.00000000    
   4.00000000    
   1.00000000    
   3.00000000    
   2.00000000    
   2.00000000    
   5.00000000    
   0.00000000    
   1.00000000    
   1.00000000    
   2.00000000    
   1.00000000    
   2.00000000    
   5.00000000    
   4.00000000    
   7.00000000    
   2.00000000    
   8.00000000    
   2.00000000    
   1.00000000    
   0.00000000    
   2.00000000    
   4.00000000    
   8.00000000    
   7.00000000    
   3.00000000    
   2.00000000    
   4.00000000    
   7.00000000    
   5.00000000    
   5.00000000    
   5.00000000    
   6.00000000    
   4.00000000    
   4.00000000    
   2.00000000    
   4.00000000    
   2.00000000    
   4.00000000    
   3.00000000    
   4.00000000    
   4.00000000    
   2.00000000    
   4.00000000    
   2.00000000    
   1.00000000    
   3.00000000    
   1.00000000    
   3.00000000    
   3.00000000    
   5.00000000    
   2.00000000    
   2.00000000    
   4.00000000    
   1.00000000    
   3.00000000    
   2.00000000    
   2.00000000    
   1.00000000    
   6.00000000    
   0.00000000    
   1.00000000    
   4.00000000    
   2.00000000    
   6.00000000    
   2.00000000    
   1.00000000    
   3.00000000    
   0.00000000    
   3.00000000    
   3.00000000    
   5.00000000    
   5.00000000    
   3.00000000    
   0.00000000    
   3.00000000    
   0.00000000    
   2.00000000    
   3.00000000    
   2.00000000    
   2.00000000    
   2.00000000    
   2.00000000    
   1.00000000    
   2.00000000    
   6.00000000    
   7.00000000    
   10.0000000    
   5.00000000    
   1.00000000    
   1.00000000    
   8.00000000    
   4.00000000    
   5.00000000    
   5.00000000    
   7.00000000    
   2.00000000    
   3.00000000    
   8.00000000    
   2.00000000    
   4.00000000    
   3.00000000    
   4.00000000    
   4.00000000    
   2.00000000    
   1.00000000    
   2.00000000    
   4.00000000    
   1.00000000    
   2.00000000    
   2.00000000    
   1.00000000    
   6.00000000    
   4.00000000    
   2.00000000    
   2.00000000    
   3.00000000    
   3.00000000    
   1.00000000    
   5.00000000    
   4.00000000    
   3.00000000    
   7.00000000    
   3.00000000    
   0.00000000    
   3.00000000    
   5.00000000    
   1.00000000    
   5.00000000    
   2.00000000    
   3.00000000    
   1.00000000    
   5.00000000    
   4.00000000    
   3.00000000    
   0.00000000    
   2.00000000    
   2.00000000    
   0.00000000    
   0.00000000    
   2.00000000    
   1.00000000    
   4.00000000    
   4.00000000    
   4.00000000    
   1.00000000    
   4.00000000    
   4.00000000    
   4.00000000    
   7.00000000    
   10.0000000    
   8.00000000    
   5.00000000    
   3.00000000    
   6.00000000    
   8.00000000    
   3.00000000    
   4.00000000    
   4.00000000    
   7.00000000    
   5.00000000    
   2.00000000    
   5.00000000    
   3.00000000    
   3.00000000    
   2.00000000    
   2.00000000    
   3.00000000    
   2.00000000    
   6.00000000    
   3.00000000    
   3.00000000    
   4.00000000    
   3.00000000    
   1.00000000    
   5.00000000    
   4.00000000    
   2.00000000    
   2.00000000    
   3.00000000    
   2.00000000    
   7.00000000    
   1.00000000    
   1.00000000    
   4.00000000    
   4.00000000    
   3.00000000    
   3.00000000    
   1.00000000    
   2.00000000    
   2.00000000    
   4.00000000    
   4.00000000    
   3.00000000    
   3.00000000    
   5.00000000    
   2.00000000    
   2.00000000    
   2.00000000    
   1.00000000    
   0.00000000    
   1.00000000    
   1.00000000    
   2.00000000    
   2.00000000    
   3.00000000    
   2.00000000    
   3.00000000    
   2.00000000    
   2.00000000    
   2.00000000    
   4.00000000    
   8.00000000    
   10.0000000    
   8.00000000    
   4.00000000    
   7.00000000    
   8.00000000    
   4.00000000    
   6.00000000    
   3.00000000    
   8.00000000    
   2.00000000    
   5.00000000    
   2.00000000    
   10.0000000    
   4.00000000    
   0.00000000    
   2.00000000    
   8.00000000    
   0.00000000    
   3.00000000    
   2.00000000    
   5.00000000    
   4.00000000    
   4.00000000    
   2.00000000    
   4.00000000    
   2.00000000    
   3.00000000    
   5.00000000    
   0.00000000    
   3.00000000    
   5.00000000    
   5.00000000    
   4.00000000    
   3.00000000    
   5.00000000    
   2.00000000    
   1.00000000    
   4.00000000    
   4.00000000    
   0.00000000    
   3.00000000    
   1.00000000    
   2.00000000    
   4.00000000    
   2.00000000    
   3.00000000    
   2.00000000    
   4.00000000    
   1.00000000    
   2.00000000    
   4.00000000    
   2.00000000    
   0.00000000    
   0.00000000    
   4.00000000    
   2.00000000    
   2.00000000    
   3.00000000    
   2.00000000    
   4.00000000    
   8.00000000    
   5.00000000    
   5.00000000    
   7.00000000    
   5.00000000    
   5.00000000    
   7.00000000    
   10.0000000    
   4.00000000    
   6.00000000    
   5.00000000    
   1.00000000    
   2.00000000    
   3.00000000    
   4.00000000    
   5.00000000    
   3.00000000    
   2.00000000    
   2.00000000    
   2.00000000    
   5.00000000    
   1.00000000    
   4.00000000    
   5.00000000    
   1.00000000    
   4.00000000    
   3.00000000    
   3.00000000    
   3.00000000    
   1.00000000    
   6.00000000    
   3.00000000    
   4.00000000    
   0.00000000    
   4.00000000    
   7.00000000    
   9.00000000    
   6.00000000    
   3.00000000    
   6.00000000    
   6.00000000    
   4.00000000    
   4.00000000    
   3.00000000    
   5.00000000    
   4.00000000    
   2.00000000    
   2.00000000    
   3.00000000    
   6.00000000    
   3.00000000    
   4.00000000    
   2.00000000    
   0.00000000    
   2.00000000    
   2.00000000    
   0.00000000    
   0.00000000    
   3.00000000    
   2.00000000    
   3.00000000    
   7.00000000    
   3.00000000    
   2.00000000    
   6.00000000    
   3.00000000    
   8.00000000    
   3.00000000    
   1.00000000    
   3.00000000    
   8.00000000    
   4.00000000    
   4.00000000    
   3.00000000    
   1.00000000    
   3.00000000    
   4.00000000    
   2.00000000    
   2.00000000    
   5.00000000    
   3.00000000    
   1.00000000    
   4.00000000    
   3.00000000    
   1.00000000    
   4.00000000    
   2.00000000    
   4.00000000    
   1.00000000    
   0.00000000    
   6.00000000    
   5.00000000    
   1.00000000    
   4.00000000    
   3.00000000    
   7.00000000    
   5.00000000    
   4.00000000    
   6.00000000    
   4.00000000    
   6.00000000    
   7.00000000    
   5.00000000    
   2.00000000    
   6.00000000    
   7.00000000    
   4.00000000    
   4.00000000    
   6.00000000    
   6.00000000    
   1.00000000    
   1.00000000    
   1.00000000    
   4.00000000    
   2.00000000    
   3.00000000    
   2.00000000    
   2.00000000    
   4.00000000    
   2.00000000    
   2.00000000    
   2.00000000    
   4.00000000    
   4.00000000    
   3.00000000    
   4.00000000    
   3.00000000    
   8.00000000    
   1.00000000    
   7.00000000    
   3.00000000    
   2.00000000    
   1.00000000    
   6.00000000    
   4.00000000    
   6.00000000    
   3.00000000    
   8.00000000    
   4.00000000    
   1.00000000    
   2.00000000    
   5.00000000    
   1.00000000    
   3.00000000    
   4.00000000    
   6.00000000    
   2.00000000    
   5.00000000    
   4.00000000    
   2.00000000    
   1.00000000    
   4.00000000    
   4.00000000    
   1.00000000    
   4.00000000    
   2.00000000    
   2.00000000    
   3.00000000    
   4.00000000    
   3.00000000    
   3.00000000    
   4.00000000    
   6.00000000    
   4.00000000    
   6.00000000    
   5.00000000    
   9.00000000    
   5.00000000    
   8.00000000    
   6.00000000    
   3.00000000    
   5.00000000    
   3.00000000    
   2.00000000    
   2.00000000    
   1.00000000    
   3.00000000    
   3.00000000    
   7.00000000    
   4.00000000    
   2.00000000    
   3.00000000    
   3.00000000    
   0.00000000    
   2.00000000    
   0.00000000    
   0.00000000    
   7.00000000    
   6.00000000    
   8.00000000    
   3.00000000    
   4.00000000    
   3.00000000    
   1.00000000    
   1.00000000    
   4.00000000    
   8.00000000    
   8.00000000    
   6.00000000    
   5.00000000    
   1.00000000    
   4.00000000    
   2.00000000    
   4.00000000    
   2.00000000    
   2.00000000    
   2.00000000    
   5.00000000    
   4.00000000    
   1.00000000    
   0.00000000    
   4.00000000    
   6.00000000    
   5.00000000    
   1.00000000    
   7.00000000    
   5.00000000    
   3.00000000    
   0.00000000    
   2.00000000    
   9.00000000    
   2.00000000    
   1.00000000    
   1.00000000    
   4.00000000    
   3.00000000    
   3.00000000    
   6.00000000    
   5.00000000    
   5.00000000    
   8.00000000    
   5.00000000    
   6.00000000    
   4.00000000    
   0.00000000    
   10.0000000    
   4.00000000    
   6.00000000    
   2.00000000    
   8.00000000    
   1.00000000    
   2.00000000    
   5.00000000    
   5.00000000    
   2.00000000    
   2.00000000    
   2.00000000    
   0.00000000    
   0.00000000    
   1.00000000    
   5.00000000    
   4.00000000    
   3.00000000    
   3.00000000    
   3.00000000    
   6.00000000    
   4.00000000    
   3.00000000    
   5.00000000    
   7.00000000    
   4.00000000    
   3.00000000    
   3.00000000    
   1.00000000    
   3.00000000    
   1.00000000    
   4.00000000    
   2.00000000    
   1.00000000    
   4.00000000    
   2.00000000    
   6.00000000    
   2.00000000    
   5.00000000    
   5.00000000    
   2.00000000    
   3.00000000    
   2.00000000    
   3.00000000    
   2.00000000    
   7.00000000    
   1.00000000    
   4.00000000    
   5.00000000    
   4.00000000    
   3.00000000    
   4.00000000    
   2.00000000    
   3.00000000    
   3.00000000    
   4.00000000    
   8.00000000    
   5.00000000    
   7.00000000    
   3.00000000    
   4.00000000    
   4.00000000    
   3.00000000    
   4.00000000    
   1.00000000    
   5.00000000    
   3.00000000    
   3.00000000    
   2.00000000    
   3.00000000    
   6.00000000    
   6.00000000    
   4.00000000    
   3.00000000    
   3.00000000    
   2.00000000    
   1.00000000    
   0.00000000    
   0.00000000    
   3.00000000    
   1.00000000    
   3.00000000    
   2.00000000    
   1.00000000    
   2.00000000    
   3.00000000    
   3.00000000    
   2.00000000    
   5.00000000    
   5.00000000    
   4.00000000    
   8.00000000    
   2.00000000    
   4.00000000    
   2.00000000    
   2.00000000    
   1.00000000    
   2.00000000    
   0.00000000    
   5.00000000    
   6.00000000    
   5.00000000    
   5.00000000    
   3.00000000    
   5.00000000    
   2.00000000    
   2.00000000    
   2.00000000    
   4.00000000    
   3.00000000    
   3.00000000    
   4.00000000    
   3.00000000    
   2.00000000    
   2.00000000    
   1.00000000    
   4.00000000    
   5.00000000    
   3.00000000    
   8.00000000    
   2.00000000    
   0.00000000    
   6.00000000    
   2.00000000    
   3.00000000    
   3.00000000    
   1.00000000    
   9.00000000    
   1.00000000    
   5.00000000    
   4.00000000    
   3.00000000    
   3.00000000    
   3.00000000    
   6.00000000    
   3.00000000    
   4.00000000    
   3.00000000    
   2.00000000    
   1.00000000    
   2.00000000    
   0.00000000    
   0.00000000    
   2.00000000    
   6.00000000    
   6.00000000    
   2.00000000    
   2.00000000    
   8.00000000    
   3.00000000    
   6.00000000    
   9.00000000    
   5.00000000    
   5.00000000    
   4.00000000    
   2.00000000    
   3.00000000    
   2.00000000    
   5.00000000    
   2.00000000    
   4.00000000    
   0.00000000    
   4.00000000    
   3.00000000    
   1.00000000    
   4.00000000    
   1.00000000    
   2.00000000    
   1.00000000    
   4.00000000    
   4.00000000    
   2.00000000    
   1.00000000    
   3.00000000    
   3.00000000    
   4.00000000    
   2.00000000    
   1.00000000    
   4.00000000    
   6.00000000    
   3.00000000    
   1.00000000    
   6.00000000    
   4.00000000    
   4.00000000    
   5.00000000    
   4.00000000    
   6.00000000    
   4.00000000    
   4.00000000    
   6.00000000    
   5.00000000    
   5.00000000    
   1.00000000    
   2.00000000    
   2.00000000    
   5.00000000    
   4.00000000    
   2.00000000    
   5.00000000    
   7.00000000    
   0.00000000    
   1.00000000    
   2.00000000    
   2.00000000    
   1.00000000    
   0.00000000    
   3.00000000    
   4.00000000    
   1.00000000    
   1.00000000    
   3.00000000    
   4.00000000    
   4.00000000    
   4.00000000    
   5.00000000    
   5.00000000    
   7.00000000    
   7.00000000    
   5.00000000    
   4.00000000    
   2.00000000    
   1.00000000    
   2.00000000    
   2.00000000    
   5.00000000    
   3.00000000    
   4.00000000    
   3.00000000    
   1.00000000    
   3.00000000    
   1.00000000    
   2.00000000    
   4.00000000    
   1.00000000    
   4.00000000    
   4.00000000    
   5.00000000    
   3.00000000    
   2.00000000    
   6.00000000    
   5.00000000    
   3.00000000    
   3.00000000    
   6.00000000    
   0.00000000    
   2.00000000    
   2.00000000    
   1.00000000    
   4.00000000    
   6.00000000    
   3.00000000    
   4.00000000    
   3.00000000    
   5.00000000    
   5.00000000    
   5.00000000    
   8.00000000    
   1.00000000    
   2.00000000    
   3.00000000    
   4.00000000    
   6.00000000    
   3.00000000    
   6.00000000    
   6.00000000    
   2.00000000    
   2.00000000    
   2.00000000    
   0.00000000    
   1.00000000    
   2.00000000    
   2.00000000    
   1.00000000    
   3.00000000    
   3.00000000    
   6.00000000    
   8.00000000    
   6.00000000    
   1.00000000    
   6.00000000    
   2.00000000    
   5.00000000    
   2.00000000    
   5.00000000    
   5.00000000    
   3.00000000    
   5.00000000    
   6.00000000    
   6.00000000    
   1.00000000    
   3.00000000    
   0.00000000    
   2.00000000    
   3.00000000    
   2.00000000    
   4.00000000    
   8.00000000    
   3.00000000    
   5.00000000    
   3.00000000    
   2.00000000    
   4.00000000    
   4.00000000    
   2.00000000    
   6.00000000    
   8.00000000    
   3.00000000    
   2.00000000    
   6.00000000    
   3.00000000    
   3.00000000    
   4.00000000    
   4.00000000    
   3.00000000    
   2.00000000    
   6.00000000    
   6.00000000    
   4.00000000    
   3.00000000    
   3.00000000    
   5.00000000    
   2.00000000    
   6.00000000    
   2.00000000    
   6.00000000    
   7.00000000    
   3.00000000    
   8.00000000    
   8.00000000    
   6.00000000    
   4.00000000    
   0.00000000    
   2.00000000    
   0.00000000    
   1.00000000    
   4.00000000    
   2.00000000    
   0.00000000    
   3.00000000    
   4.00000000    
   7.00000000    
   8.00000000    
   7.00000000    
   4.00000000    
   3.00000000    
   2.00000000    
   10.0000000    
   3.00000000    
   3.00000000    
   4.00000000    
   4.00000000    
   2.00000000    
   5.00000000    
   4.00000000    
   1.00000000    
   2.00000000    
   4.00000000    
   3.00000000    
   2.00000000    
   6.00000000    
   6.00000000    
   5.00000000    
   3.00000000    
   7.00000000    
   5.00000000    
   2.00000000    
   6.00000000    
   6.00000000    
   1.00000000    
   3.00000000    
   2.00000000    
   2.00000000    
   2.00000000    
   5.00000000    
   5.00000000    
   4.00000000    
   4.00000000    
   5.00000000    
   1.00000000    
   2.00000000    
   4.00000000    
   3.00000000    
   1.00000000    
   3.00000000    
   3.00000000    
   5.00000000    
   5.00000000    
   3.00000000    
   4.00000000    
   3.00000000    
   9.00000000    
   4.00000000    
   2.00000000    
   3.00000000    
   4.00000000    
   1.00000000    
   1.00000000    
   0.00000000    
   0.00000000    
   2.00000000    
   4.00000000    
   2.00000000    
   5.00000000    
   2.00000000    
   5.00000000    
   2.00000000    
   6.00000000    
   4.00000000    
   8.00000000    
   5.00000000    
   4.00000000    
   2.00000000    
   1.00000000    
   6.00000000    
   1.00000000    
   5.00000000    
   5.00000000    
   1.00000000    
   3.00000000    
   3.00000000    
   3.00000000    
   4.00000000    
   3.00000000    
   1.00000000    
   5.00000000    
   2.00000000    
   10.0000000    
   3.00000000    
   4.00000000    
   6.00000000    
   4.00000000    
   7.00000000    
   4.00000000    
   4.00000000    
   3.00000000    
   2.00000000    
   7.00000000    
   3.00000000    
   4.00000000    
   3.00000000    
   1.00000000    
   6.00000000    
   6.00000000    
   3.00000000    
   2.00000000    
   4.00000000    
   6.00000000    
   4.00000000    
   7.00000000    
   6.00000000    
   5.00000000    
   7.00000000    
   8.00000000    
   9.00000000    
   16.0000000    
   9.00000000    
   4.00000000    
   2.00000000    
   1.00000000    
   0.00000000    
   0.00000000    
   0.00000000    
   2.00000000    
   2.00000000    
   2.00000000    
   1.00000000    
   7.00000000    
   2.00000000    
   4.00000000    
   5.00000000    
   3.00000000    
   2.00000000    
   2.00000000    
   3.00000000    
   0.00000000    
   2.00000000    
   4.00000000    
   2.00000000    
   0.00000000    
   5.00000000    
   3.00000000    
   2.00000000    
   1.00000000    
   2.00000000    
   2.00000000    
   3.00000000    
   4.00000000    
   7.00000000    
   2.00000000    
   4.00000000    
   4.00000000    
   5.00000000    
   1.00000000    
   5.00000000    
   1.00000000    
   3.00000000    
   3.00000000    
   6.00000000    
   1.00000000    
   4.00000000    
   0.00000000    
   11.0000000    
   5.00000000    
   0.00000000    
   2.00000000    
   2.00000000    
   4.00000000    
   3.00000000    
   3.00000000    
   3.00000000    
   6.00000000    
   5.00000000    
   7.00000000    
   5.00000000    
   3.00000000    
   7.00000000    
   11.0000000    
   7.00000000    
   8.00000000    
   8.00000000    
   4.00000000    
   5.00000000    
   3.00000000    
   2.00000000
[truncated: 4,321,189 more chars]
